# Supplementary material for: 16OSTM10: a new open-shell transition metal conformational energy database to challenge contemporary semiempirical and force field methods
Source: Royal Society of Chemistry journal article supplement (doi:10.1039/d2cp01659a), 2022-01-01
Supplement: d2cp01659a1.pdf [file d2cp01659a1.pdf]

Supporting information for:

16OSTM10: A new open-shell transition metal  
conformational energies database to challenge  
contemporary semiempirical and force field methods

*Arseniy A. Otlyotov,<sup>1</sup> Andrey D. Moshchenkov,<sup>1,2</sup> Luigi Cavallo<sup>3\*</sup> and Yury Minenkov<sup>1,4\*</sup>*

<sup>1</sup> N.N. Semenov Federal Research Center for Chemical Physics RAS, Kosygina Street 4, 119991,  
Moscow, Russia

<sup>2</sup> Higher Chemical College of the Russian Academy of Sciences, Dmitry Mendeleev University of  
Chemical Technology of Russia, Miusskaya sq. 9, 125047, Moscow, Russia

<sup>3</sup> KAUST Catalysis Center (KCC), King Abdullah University of Science and Technology, Thuwal  
23955-6900, Saudi Arabia

<sup>4</sup> Joint Institute for High Temperatures, Russian Academy of Sciences, 13-2 Izhorskaya Street,  
Moscow 125412, Russia

## Contents:

|                                                                                                                             |    |
|-----------------------------------------------------------------------------------------------------------------------------|----|
| Tables forming the basis of Figures 2-8 in the main text.....                                                               | 3  |
| Table S1. Table forming the basis of Figure 2.....                                                                          | 3  |
| Table S2. Table forming the basis of Figure 3.....                                                                          | 3  |
| Table S3. Table forming the basis of Figure 4.....                                                                          | 5  |
| Table S4. Table forming the basis of Figure 5.....                                                                          | 6  |
| Table S5. Table forming the basis of Figure 6.....                                                                          | 9  |
| Table S6. Table forming the basis of Figure 7.....                                                                          | 9  |
| Table S7. Table forming the basis of Figure 8.....                                                                          | 10 |
| Table S8. T1/T2 diagnostic values for 10 compounds of 16OSTM10 database.....                                                | 14 |
| FOD plots .....                                                                                                             | 14 |
| Figure S1. Qualitative FOD diagnostics for FIYMEI. The isosurface value is $\sigma = 0.005 \text{ e/Bohr}^3$ . .....        | 14 |
| Figure S2. Qualitative FOD diagnostics for UZEYAA. The isosurface value is $\sigma = 0.005 \text{ e/Bohr}^3$ . .....        | 15 |
| Figure S3. Qualitative FOD diagnostics for FUDNIB. The isosurface value is $\sigma = 0.005 \text{ e/Bohr}^3$ . .....        | 16 |
| Figure S4. Qualitative FOD diagnostics for YIKLUC. The isosurface value is $\sigma = 0.005 \text{ e/Bohr}^3$ . .....        | 16 |
| Figure S5. Qualitative FOD diagnostics for AJOMIX. The isosurface value is $\sigma = 0.005 \text{ e/Bohr}^3$ . .....        | 17 |
| Figure S6. Qualitative FOD diagnostics for LIBLEN. The isosurface value is $\sigma = 0.005 \text{ e/Bohr}^3$ . .....        | 17 |
| Composition of the $\lambda_1$ and $\lambda_2$ basis sets used in the Priroda calculations .....                            | 17 |
| Tabulated absolute conformational energies and optimized Cartesian coordinates for the compounds of 16OSTM10 database. .... | 18 |

## Tables forming the basis of Figures 2-8 in the main text

**Table S1. Table forming the basis of Figure 2.**

| Method         | PBE    | PBE0   | M06    | $\omega$ B97X-V |
|----------------|--------|--------|--------|-----------------|
| min            | 0.42   | 0.68   | 0.65   | 0.36            |
| average        | 0.91   | 0.94   | 0.92   | 0.87            |
| max            | 0.99   | 1.00   | 0.99   | 0.99            |
| Worst compound | LUFCIZ | LUFCIZ | LUFCIZ | LUFCIZ          |
| Best compound  | ONEHAS | ONEHAS | FUHWAG | ONEHAS          |

### Pearson correlation coefficients for conformational energies

|        | PBE  | PBE0 | M06  | $\omega$ B97X-V |
|--------|------|------|------|-----------------|
| ADULES | 0.95 | 0.93 | 0.90 | 0.92            |
| AJOMIX | 0.81 | 0.89 | 0.81 | 0.71            |
| AQINUK | 0.99 | 0.99 | 0.98 | 0.99            |
| AVIXIO | 0.99 | 0.99 | 0.98 | 0.99            |
| FIYMEI | 0.83 | 0.83 | 0.74 | 0.54            |
| FUDNIB | 0.84 | 0.88 | 0.89 | 0.65            |
| FUHWAG | 0.99 | 0.99 | 0.99 | 0.99            |
| LIBLEN | 0.98 | 0.97 | 0.94 | 0.97            |
| LUFCIZ | 0.42 | 0.68 | 0.65 | 0.36            |
| ONEHAS | 0.99 | 1.00 | 0.98 | 0.99            |
| OQOQOB | 0.98 | 0.99 | 0.98 | 0.98            |
| QUHVAS | 0.97 | 0.98 | 0.96 | 0.96            |
| ROBHUN | 0.99 | 0.99 | 0.99 | 0.99            |
| UZEYAA | 0.93 | 0.96 | 0.91 | 0.93            |
| WUDYOL | 0.99 | 0.99 | 0.98 | 0.97            |
| YIKLUC | 0.98 | 0.99 | 0.99 | 0.99            |

**Table S2. Table forming the basis of Figure 3.**

### Mean correlation coefficients for PBEh-3c.

|        | average | min  | max  |
|--------|---------|------|------|
| ADULES | 0.86    | 0.80 | 0.90 |
| AJOMIX | 0.35    | 0.06 | 0.55 |
| AQINUK | 0.99    | 0.98 | 0.99 |
| AVIXIO | 0.99    | 0.98 | 0.99 |
| FIYMEI | 0.85    | 0.69 | 0.95 |
| FUDNIB | 0.92    | 0.78 | 0.98 |
| FUHWAG | 0.99    | 0.98 | 0.99 |
| LIBLEN | 0.93    | 0.84 | 0.97 |
| LUFCIZ | 0.72    | 0.38 | 0.96 |
| ONEHAS | 0.99    | 0.98 | 1.00 |
| OQOQOB | 0.91    | 0.87 | 0.95 |
| QUHVAS | 0.96    | 0.94 | 0.98 |
| ROBHUN | 0.98    | 0.97 | 0.99 |
| UZEYAA | 0.93    | 0.89 | 0.95 |

|        |      |      |      |
|--------|------|------|------|
| WUDYOL | 0.98 | 0.96 | 0.99 |
| YIKLUC | 0.98 | 0.97 | 0.99 |

**Mean correlation coefficients for B97-3c.**

|        | <b>average</b> | <b>min</b> | <b>max</b> |
|--------|----------------|------------|------------|
| ADULES | 0.96           | 0.94       | 1.00       |
| AJOMIX | 0.88           | 0.68       | 0.98       |
| AQINUK | 0.99           | 0.98       | 1.00       |
| AVIXIO | 0.99           | 0.98       | 1.00       |
| FIYMEI | 0.88           | 0.61       | 0.99       |
| FUDNIB | 0.90           | 0.64       | 0.99       |
| FUHWAG | 0.99           | 0.99       | 1.00       |
| LIBLEN | 0.95           | 0.89       | 0.98       |
| LUFCIZ | 0.72           | 0.28       | 0.95       |
| ONEHAS | 1.00           | 0.99       | 1.00       |
| OQOQOB | 0.99           | 0.99       | 1.00       |
| QUHVAS | 0.98           | 0.97       | 1.00       |
| ROBHUN | 0.99           | 0.98       | 1.00       |
| UZEYAA | 0.95           | 0.90       | 1.00       |
| WUDYOL | 0.99           | 0.98       | 1.00       |
| YIKLUC | 0.99           | 0.98       | 1.00       |

**Correlation coefficients for PBEh-3c.**

|        | <b>PBE</b> | <b>PBE0</b> | <b>M06</b> | <b><math>\omega</math>B97X-V</b> |
|--------|------------|-------------|------------|----------------------------------|
| ADULES | 0.85       | 0.80        | 0.87       | 0.90                             |
| AJOMIX | 0.06       | 0.35        | 0.55       | 0.46                             |
| AQINUK | 0.99       | 0.99        | 0.98       | 0.99                             |
| AVIXIO | 0.99       | 0.99        | 0.99       | 0.98                             |
| FIYMEI | 0.92       | 0.95        | 0.85       | 0.69                             |
| FUDNIB | 0.95       | 0.98        | 0.98       | 0.78                             |
| FUHWAG | 0.99       | 0.99        | 0.98       | 0.98                             |
| LIBLEN | 0.94       | 0.97        | 0.84       | 0.97                             |
| LUFCIZ | 0.38       | 0.96        | 0.68       | 0.86                             |
| ONEHAS | 1.00       | 1.00        | 0.98       | 1.00                             |
| OQOQOB | 0.87       | 0.92        | 0.91       | 0.95                             |
| QUHVAS | 0.94       | 0.95        | 0.95       | 0.98                             |
| ROBHUN | 0.97       | 0.98        | 0.97       | 0.99                             |
| UZEYAA | 0.92       | 0.94        | 0.89       | 0.95                             |
| WUDYOL | 0.98       | 0.99        | 0.99       | 0.96                             |
| YIKLUC | 0.97       | 0.98        | 0.99       | 0.98                             |

**Correlation coefficients for B97-3c.**

|        | <b>PBE</b> | <b>PBE0</b> | <b>M06</b> | <b><math>\omega</math>B97X-V</b> |
|--------|------------|-------------|------------|----------------------------------|
| ADULES | 1.00       | 0.94        | 0.94       | 0.96                             |
| AJOMIX | 0.97       | 0.98        | 0.90       | 0.68                             |
| AQINUK | 1.00       | 1.00        | 0.98       | 0.99                             |
| AVIXIO | 1.00       | 0.99        | 0.98       | 0.99                             |
| FIYMEI | 0.99       | 0.99        | 0.93       | 0.61                             |

|        |      |      |      |      |
|--------|------|------|------|------|
| FUDNIB | 0.99 | 0.99 | 0.98 | 0.64 |
| FUHWAG | 0.99 | 1.00 | 0.99 | 1.00 |
| LIBLEN | 0.98 | 0.97 | 0.89 | 0.97 |
| LUFCIZ | 0.94 | 0.71 | 0.95 | 0.28 |
| ONEHAS | 1.00 | 1.00 | 0.99 | 1.00 |
| QQOQOB | 0.99 | 1.00 | 0.99 | 0.99 |
| QUHVAS | 1.00 | 1.00 | 0.97 | 0.97 |
| ROBHUN | 1.00 | 0.99 | 0.98 | 0.98 |
| UZEYAA | 1.00 | 0.99 | 0.90 | 0.93 |
| WUDYOL | 0.99 | 1.00 | 0.99 | 0.98 |
| YIKLUC | 1.00 | 1.00 | 0.98 | 0.98 |

**Table S3. Table forming the basis of Figure 4.**

**Mean correlation coefficients for PM6.**

|        | <b>average</b> | <b>min</b> | <b>max</b> |
|--------|----------------|------------|------------|
| ADULES | 0.94           | 0.89       | 0.98       |
| AJOMIX | 0.24           | 0.00       | 0.47       |
| AQINUK | -0.14          | -0.19      | -0.12      |
| AVIXIO | 0.61           | 0.56       | 0.65       |
| FIYMEI | -0.42          | -0.65      | -0.05      |
| FUDNIB | 0.46           | 0.38       | 0.54       |
| FUHWAG | 0.60           | 0.53       | 0.65       |
| LIBLEN | 0.63           | 0.58       | 0.68       |
| LUFCIZ | 0.16           | -0.59      | 0.79       |
| ONEHAS | 0.69           | 0.67       | 0.75       |
| QQOQOB | 0.02           | -0.02      | 0.07       |
| QUHVAS | 0.93           | 0.91       | 0.97       |
| ROBHUN | 0.82           | 0.78       | 0.85       |
| UZEYAA | 0.84           | 0.78       | 0.90       |
| WUDYOL | 0.94           | 0.92       | 0.96       |
| YIKLUC | 0.72           | 0.65       | 0.78       |

**Mean correlation coefficients for PM7.**

|        | <b>average</b> | <b>min</b> | <b>max</b> |
|--------|----------------|------------|------------|
| ADULES | 0.94           | 0.89       | 0.97       |
| AJOMIX | 0.51           | 0.28       | 0.73       |
| AQINUK | -0.11          | -0.17      | -0.08      |
| AVIXIO | 0.95           | 0.94       | 0.95       |
| FIYMEI | -0.03          | -0.26      | 0.16       |
| FUDNIB | 0.34           | -0.07      | 0.57       |
| FUHWAG | 0.97           | 0.96       | 0.97       |
| LIBLEN | 0.09           | 0.05       | 0.20       |
| LUFCIZ | 0.33           | -0.36      | 0.86       |
| ONEHAS | 0.95           | 0.93       | 0.97       |
| QQOQOB | 0.83           | 0.81       | 0.84       |
| QUHVAS | 0.81           | 0.75       | 0.85       |
| ROBHUN | 0.64           | 0.61       | 0.65       |

|        |      |      |      |
|--------|------|------|------|
| UZEYAA | 0.71 | 0.69 | 0.75 |
| WUDYOL | 0.05 | 0.03 | 0.10 |
| YIKLUC | 0.82 | 0.79 | 0.87 |

**Correlation coefficients for PM6.**

|        | <b>PBE</b> | <b>PBE0</b> | <b>M06</b> | <b><math>\omega</math>B97X-V</b> |
|--------|------------|-------------|------------|----------------------------------|
| ADULES | 0.98       | 0.92        | 0.89       | 0.97                             |
| AJOMIX | 0.47       | 0.24        | 0.00       | 0.25                             |
| AQINUK | -0.12      | -0.12       | -0.12      | -0.19                            |
| AVIXIO | 0.63       | 0.61        | 0.65       | 0.56                             |
| FIYMEI | -0.60      | -0.65       | -0.38      | -0.05                            |
| FUDNIB | 0.38       | 0.50        | 0.54       | 0.43                             |
| FUHWAG | 0.65       | 0.65        | 0.53       | 0.57                             |
| LIBLEN | 0.68       | 0.64        | 0.58       | 0.63                             |
| LUFCIZ | 0.79       | -0.09       | 0.52       | -0.59                            |
| ONEHAS | 0.68       | 0.69        | 0.75       | 0.67                             |
| QQOQOB | -0.02      | 0.00        | 0.07       | 0.05                             |
| QUHVAS | 0.93       | 0.92        | 0.91       | 0.97                             |
| ROBHUN | 0.83       | 0.85        | 0.78       | 0.84                             |
| UZEYAA | 0.84       | 0.85        | 0.78       | 0.90                             |
| WUDYOL | 0.96       | 0.94        | 0.95       | 0.92                             |
| YIKLUC | 0.65       | 0.72        | 0.74       | 0.78                             |

**Correlation coefficients for PM7.**

|        | <b>PBE</b> | <b>PBE0</b> | <b>M06</b> | <b><math>\omega</math>B97X-V</b> |
|--------|------------|-------------|------------|----------------------------------|
| ADULES | 0.93       | 0.97        | 0.89       | 0.96                             |
| AJOMIX | 0.73       | 0.60        | 0.43       | 0.28                             |
| AQINUK | -0.11      | -0.10       | -0.08      | -0.17                            |
| AVIXIO | 0.95       | 0.95        | 0.94       | 0.94                             |
| FIYMEI | 0.05       | -0.06       | 0.16       | -0.26                            |
| FUDNIB | 0.57       | 0.46        | 0.39       | -0.07                            |
| FUHWAG | 0.97       | 0.97        | 0.96       | 0.97                             |
| LIBLEN | 0.07       | 0.06        | 0.20       | 0.05                             |
| LUFCIZ | 0.86       | 0.12        | 0.68       | -0.36                            |
| ONEHAS | 0.93       | 0.94        | 0.97       | 0.94                             |
| QQOQOB | 0.84       | 0.83        | 0.81       | 0.83                             |
| QUHVAS | 0.81       | 0.85        | 0.82       | 0.75                             |
| ROBHUN | 0.65       | 0.63        | 0.61       | 0.65                             |
| UZEYAA | 0.69       | 0.70        | 0.75       | 0.69                             |
| WUDYOL | 0.10       | 0.05        | 0.04       | 0.03                             |
| YIKLUC | 0.79       | 0.83        | 0.81       | 0.87                             |

**Table S4. Table forming the basis of Figure 5.**

**Mean correlation coefficients for GFN1-xTB.**

|        | <b>average</b> | <b>min</b> | <b>max</b> |
|--------|----------------|------------|------------|
| ADULES | 0.95           | 0.93       | 0.97       |

|        |       |       |      |
|--------|-------|-------|------|
| AJOMIX | 0.57  | 0.20  | 0.82 |
| AQINUK | 0.25  | 0.24  | 0.26 |
| AVIXIO | 0.97  | 0.95  | 0.98 |
| FIYMEI | 0.35  | -0.05 | 0.55 |
| FUDNIB | 0.78  | 0.40  | 0.92 |
| FUHWAG | 0.96  | 0.95  | 0.98 |
| LIBLEN | -0.01 | -0.06 | 0.05 |
| LUFCIZ | 0.62  | 0.19  | 0.88 |
| ONEHAS | 0.98  | 0.98  | 0.99 |
| QQOQOB | 0.91  | 0.90  | 0.92 |
| QUHVAS | 0.95  | 0.94  | 0.96 |
| ROBHUN | 0.78  | 0.73  | 0.82 |
| UZEYAA | 0.76  | 0.66  | 0.80 |
| WUDYOL | 0.93  | 0.90  | 0.95 |
| YIKLUC | -     | -     | -    |

**Mean correlation coefficients for GFN2-xTB.**

|        | <b>average</b> | <b>min</b> | <b>max</b> |
|--------|----------------|------------|------------|
| ADULES | 0.97           | 0.93       | 0.98       |
| AJOMIX | 0.77           | 0.42       | 0.91       |
| AQINUK | 0.31           | 0.27       | 0.33       |
| AVIXIO | 0.92           | 0.89       | 0.93       |
| FIYMEI | 0.81           | 0.46       | 0.93       |
| FUDNIB | 0.76           | 0.45       | 0.89       |
| FUHWAG | 0.97           | 0.95       | 0.98       |
| LIBLEN | 0.62           | 0.56       | 0.66       |
| LUFCIZ | 0.25           | -0.40      | 0.72       |
| ONEHAS | 0.97           | 0.96       | 0.97       |
| QQOQOB | 0.76           | 0.74       | 0.79       |
| QUHVAS | 0.96           | 0.95       | 0.97       |
| ROBHUN | 0.77           | 0.73       | 0.80       |
| UZEYAA | 0.87           | 0.82       | 0.91       |
| WUDYOL | 0.97           | 0.95       | 0.99       |
| YIKLUC | 0.95           | 0.94       | 0.95       |

**Mean correlation coefficients for GFN-FF.**

|        | <b>average</b> | <b>min</b> | <b>max</b> |
|--------|----------------|------------|------------|
| ADULES | 0.93           | 0.90       | 0.97       |
| AJOMIX | -0.10          | -0.35      | 0.11       |
| AQINUK | 0.49           | 0.48       | 0.50       |
| AVIXIO | 0.90           | 0.88       | 0.91       |
| FIYMEI | 0.40           | 0.02       | 0.58       |
| FUDNIB | 0.13           | 0.04       | 0.24       |
| FUHWAG | 0.98           | 0.98       | 0.98       |
| LIBLEN | 0.30           | 0.15       | 0.36       |
| LUFCIZ | 0.06           | -0.60      | 0.75       |
| ONEHAS | 0.98           | 0.97       | 0.99       |
| QQOQOB | 0.96           | 0.94       | 0.98       |
| QUHVAS | 0.82           | 0.78       | 0.84       |

|        |      |      |      |
|--------|------|------|------|
| ROBHUN | 0.58 | 0.55 | 0.61 |
| UZEYAA | 0.83 | 0.78 | 0.86 |
| WUDYOL | 0.93 | 0.90 | 0.95 |
| YIKLUC | 0.76 | 0.69 | 0.81 |

**Correlation coefficients for GFN1-xTB.**

|        | <b>PBE</b> | <b>PBE0</b> | <b>M06</b> | <b><math>\omega</math>B97X-V</b> |
|--------|------------|-------------|------------|----------------------------------|
| ADULES | 0.97       | 0.96        | 0.93       | 0.96                             |
| AJOMIX | 0.82       | 0.69        | 0.56       | 0.20                             |
| AQINUK | 0.26       | 0.26        | 0.25       | 0.24                             |
| AVIXIO | 0.98       | 0.98        | 0.95       | 0.97                             |
| FIYMEI | 0.52       | 0.55        | 0.38       | -0.05                            |
| FUDNIB | 0.92       | 0.91        | 0.88       | 0.40                             |
| FUHWAG | 0.95       | 0.96        | 0.97       | 0.98                             |
| LIBLEN | 0.05       | -0.06       | 0.03       | -0.06                            |
| LUFCIZ | 0.19       | 0.88        | 0.60       | 0.80                             |
| ONEHAS | 0.98       | 0.99        | 0.98       | 0.99                             |
| OQOQOB | 0.92       | 0.92        | 0.90       | 0.91                             |
| QUHVAS | 0.95       | 0.94        | 0.95       | 0.96                             |
| ROBHUN | 0.73       | 0.79        | 0.77       | 0.82                             |
| UZEYAA | 0.80       | 0.80        | 0.66       | 0.78                             |
| WUDYOL | 0.95       | 0.94        | 0.94       | 0.90                             |
| YIKLUC | -          | -           | -          | -                                |

**Correlation coefficients for GFN2-xTB.**

|        | <b>PBE</b> | <b>PBE0</b> | <b>M06</b> | <b><math>\omega</math>B97X-V</b> |
|--------|------------|-------------|------------|----------------------------------|
| ADULES | 0.98       | 0.97        | 0.93       | 0.97                             |
| AJOMIX | 0.91       | 0.89        | 0.84       | 0.42                             |
| AQINUK | 0.33       | 0.33        | 0.32       | 0.27                             |
| AVIXIO | 0.92       | 0.93        | 0.89       | 0.92                             |
| FIYMEI | 0.93       | 0.93        | 0.91       | 0.46                             |
| FUDNIB | 0.89       | 0.89        | 0.84       | 0.45                             |
| FUHWAG | 0.95       | 0.95        | 0.98       | 0.98                             |
| LIBLEN | 0.66       | 0.63        | 0.56       | 0.61                             |
| LUFCIZ | -0.40      | 0.58        | 0.10       | 0.72                             |
| ONEHAS | 0.97       | 0.97        | 0.96       | 0.97                             |
| OQOQOB | 0.79       | 0.75        | 0.75       | 0.74                             |
| QUHVAS | 0.96       | 0.95        | 0.95       | 0.97                             |
| ROBHUN | 0.73       | 0.76        | 0.78       | 0.80                             |
| UZEYAA | 0.87       | 0.91        | 0.82       | 0.90                             |
| WUDYOL | 0.99       | 0.98        | 0.98       | 0.95                             |
| YIKLUC | 0.94       | 0.95        | 0.95       | 0.95                             |

**Correlation coefficients for GFN-FF.**

|        | <b>PBE</b> | <b>PBE0</b> | <b>M06</b> | <b><math>\omega</math>B97X-V</b> |
|--------|------------|-------------|------------|----------------------------------|
| ADULES | 0.97       | 0.90        | 0.91       | 0.96                             |
| AJOMIX | -0.35      | -0.12       | 0.11       | -0.06                            |
| AQINUK | 0.50       | 0.49        | 0.48       | 0.50                             |



|        |      |       |      |       |
|--------|------|-------|------|-------|
| AVIXIO | 0.91 | 0.90  | 0.88 | 0.91  |
| FIYMEI | 0.52 | 0.58  | 0.47 | 0.02  |
| FUDNIB | 0.04 | 0.14  | 0.10 | 0.24  |
| FUHWAG | 0.98 | 0.98  | 0.98 | 0.98  |
| LIBLEN | 0.36 | 0.36  | 0.15 | 0.33  |
| LUFClZ | 0.75 | -0.25 | 0.34 | -0.60 |
| ONEHAS | 0.98 | 0.98  | 0.97 | 0.99  |
| OQOQOB | 0.98 | 0.97  | 0.96 | 0.94  |
| QUHVAS | 0.82 | 0.78  | 0.84 | 0.83  |
| ROBHUN | 0.55 | 0.57  | 0.59 | 0.61  |
| UZEYAA | 0.86 | 0.85  | 0.78 | 0.83  |
| WUDYOL | 0.95 | 0.93  | 0.94 | 0.90  |
| YIKLUC | 0.69 | 0.75  | 0.78 | 0.81  |

**Table S5. Table forming the basis of Figure 6.**

|                 | <b>Q3</b> | <b>Q1</b> | <b>max</b> | <b>min</b> | <b>median</b> |
|-----------------|-----------|-----------|------------|------------|---------------|
| PBE-D3 (BJ)     | 0.99      | 0.91      | 0.99       | 0.42       | 0.98          |
| PBE0-D3 (BJ)    | 0.99      | 0.92      | 1.00       | 0.68       | 0.98          |
| M06             | 0.98      | 0.90      | 0.99       | 0.65       | 0.97          |
| $\omega$ B97X-V | 0.99      | 0.87      | 0.99       | 0.36       | 0.97          |
| PBEh-3c         | 0.98      | 0.90      | 0.99       | 0.35       | 0.94          |
| B97-3c          | 0.99      | 0.94      | 1.00       | 0.72       | 0.99          |
| PM6             | 0.83      | 0.22      | 0.94       | -0.42      | 0.62          |
| PM7             | 0.86      | 0.27      | 0.97       | -0.11      | 0.67          |
| GFN1-xTB        | 0.95      | 0.59      | 0.98       | -0.01      | 0.78          |
| GFN2-xTB        | 0.96      | 0.76      | 0.97       | 0.25       | 0.84          |
| GFN-FF          | 0.93      | 0.37      | 0.98       | -0.10      | 0.79          |

**Table S6. Table forming the basis of Figure 7.**

|                 | <b><math>\tau, s</math></b> |
|-----------------|-----------------------------|
| PBE-D3 (BJ)     | 191.554                     |
| PBE0-D3 (BJ)    | 2833.729                    |
| M06             | 2985.011                    |
| $\omega$ B97X-V | 5083.924                    |
| B97-3c          | 89.404                      |
| PBEh-3c         | 732.035                     |
| GFN1            | 0.102                       |
| GFN2            | 0.045                       |
| GFN-FF          | 0.002                       |
| PM6             | 0.06                        |
| PM7             | 0.06                        |

Computer architecture: Intel(R) Core(TM) i5-10600K CPU @ 4.10GHz, 12 Gb RAM. Single core was utilized.

**Table S7. Table forming the basis of Figure 8.****Pearson correlation coefficients for the compounds of 16OSTM10 database.**

|        | $\rho(\text{PBE}/\lambda_2, \text{PBE-D3}/\lambda_2)$ |
|--------|-------------------------------------------------------|
| ADULES | 0.98                                                  |
| AJOMIX | 0.83                                                  |
| AQINUK | 0.97                                                  |
| AVIXIO | -0.03                                                 |
| FIYMEI | 0.43                                                  |
| FUDNIB | 0.57                                                  |
| FUHWAG | 0.82                                                  |
| LIBLEN | 0.96                                                  |
| LUFClZ | 0.90                                                  |
| ONEHAS | 0.99                                                  |
| OQOQOB | 0.36                                                  |
| QUHVAS | 0.97                                                  |
| ROBHUN | 0.97                                                  |
| UZEYAA | 0.96                                                  |
| WUDYOL | 0.98                                                  |
| YIKLUC | 1.00                                                  |

**Absolute energies of the conformations.**

|           | $E(\text{PBE}/\lambda_2)$ , Hartree | $E(\text{PBE-D3}/\lambda_2)$ , Hartree |
|-----------|-------------------------------------|----------------------------------------|
| AQINUK_13 | -14773.18958987                     | -14773.39572320                        |
| AQINUK_15 | -14773.18909685                     | -14773.39552260                        |
| AQINUK_17 | -14773.19006450                     | -14773.39754890                        |
| AQINUK_20 | -14773.18209972                     | -14773.39202320                        |
| AQINUK_22 | -14773.18803601                     | -14773.39488890                        |
| AQINUK_29 | -14773.18532039                     | -14773.39373860                        |
| AQINUK_32 | -14773.19374792                     | -14773.39866630                        |
| AQINUK_6  | -14773.19137329                     | -14773.39682680                        |
| AQINUK_7  | -14773.18870787                     | -14773.39502500                        |
| AQINUK_9  | -14773.19005499                     | -14773.39643980                        |
| AVIXIO_10 | -9169.07080765                      | -9169.39987730                         |
| AVIXIO_13 | -9169.06718954                      | -9169.41365544                         |
| AVIXIO_14 | -9169.05921435                      | -9169.39063622                         |
| AVIXIO_18 | -9169.06941891                      | -9169.38825686                         |
| AVIXIO_1  | -9169.06659658                      | -9169.40484071                         |
| AVIXIO_20 | -9169.07301828                      | -9169.39140229                         |
| AVIXIO_21 | -9169.05871940                      | -9169.39329549                         |
| AVIXIO_29 | -9169.06583520                      | -9169.40183112                         |
| AVIXIO_6  | -9169.06861715                      | -9169.37467736                         |
| AVIXIO_7  | -9169.06432069                      | -9169.39715459                         |
| FUHWAG_14 | -5610.75066424                      | -5611.06911273                         |
| FUHWAG_15 | -5610.76285951                      | -5611.08308297                         |
| FUHWAG_27 | -5610.76084649                      | -5611.08836039                         |
| FUHWAG_31 | -5610.75217648                      | -5611.05050731                         |

|           |                |                |
|-----------|----------------|----------------|
| FUHWAG_32 | -5610.72998715 | -5611.05610486 |
| FUHWAG_33 | -5610.75733521 | -5611.07626111 |
| FUHWAG_34 | -5610.72692895 | -5611.03402162 |
| FUHWAG_3  | -5610.75776431 | -5611.07501040 |
| FUHWAG_6  | -5610.75241487 | -5611.05682053 |
| FUHWAG_8  | -5610.76168456 | -5611.07307748 |
| OQOQOB_10 | -6284.93613798 | -6285.28693455 |
| OQOQOB_13 | -6284.93992218 | -6285.30791036 |
| OQOQOB_17 | -6284.93206104 | -6285.26427936 |
| OQOQOB_1  | -6284.93906166 | -6285.28292884 |
| OQOQOB_22 | -6284.92968058 | -6285.27806728 |
| OQOQOB_26 | -6284.93884803 | -6285.26721225 |
| OQOQOB_30 | -6284.93421247 | -6285.28266902 |
| OQOQOB_3  | -6284.93443704 | -6285.28502328 |
| OQOQOB_6  | -6284.95258933 | -6285.27274288 |
| OQOQOB_8  | -6284.95766487 | -6285.30261991 |
| WUDYOL_0  | -3365.92567093 | -3366.04385828 |
| WUDYOL_16 | -3365.92633909 | -3366.04424275 |
| WUDYOL_19 | -3365.92465111 | -3366.04352511 |
| WUDYOL_20 | -3365.92458616 | -3366.04153828 |
| WUDYOL_21 | -3365.92417380 | -3366.04217666 |
| WUDYOL_32 | -3365.91831691 | -3366.03715427 |
| WUDYOL_34 | -3365.91526920 | -3366.03412316 |
| WUDYOL_3  | -3365.92274571 | -3366.03971021 |
| WUDYOL_7  | -3365.91766403 | -3366.03718520 |
| WUDYOL_8  | -3365.91824895 | -3366.03746748 |
| YIKLUC_15 | -2947.60179050 | -2947.76280711 |
| YIKLUC_18 | -2947.60146966 | -2947.76289800 |
| YIKLUC_19 | -2947.60191833 | -2947.76320955 |
| YIKLUC_27 | -2947.60490643 | -2947.76733277 |
| YIKLUC_29 | -2947.59464934 | -2947.75565699 |
| YIKLUC_30 | -2947.60490877 | -2947.76644897 |
| YIKLUC_32 | -2947.59925495 | -2947.75987496 |
| YIKLUC_33 | -2947.60087199 | -2947.76217573 |
| YIKLUC_34 | -2947.59694240 | -2947.75763625 |
| YIKLUC_9  | -2947.60617699 | -2947.76834241 |
| LIBLEN_16 | -2728.89037254 | -2729.03958725 |
| LIBLEN_18 | -2728.89052564 | -2729.03964391 |
| LIBLEN_1  | -2728.89612672 | -2729.04336249 |
| LIBLEN_23 | -2728.89052627 | -2729.04016380 |
| LIBLEN_24 | -2728.88899990 | -2729.03526877 |
| LIBLEN_25 | -2728.88368277 | -2729.03230438 |
| LIBLEN_26 | -2728.89053615 | -2729.03910705 |
| LIBLEN_31 | -2728.88409753 | -2729.03322960 |
| LIBLEN_33 | -2728.89502980 | -2729.04172213 |
| LIBLEN_3  | -2728.89564956 | -2729.04289863 |
| ONEHAS_12 | -3244.41006970 | -3244.63082024 |
| ONEHAS_14 | -3244.41199479 | -3244.63092203 |
| ONEHAS_17 | -3244.40329840 | -3244.62429939 |
| ONEHAS_22 | -3244.40357900 | -3244.62417748 |

|           |                |                |
|-----------|----------------|----------------|
| ONEHAS_23 | -3244.39875918 | -3244.61790303 |
| ONEHAS_27 | -3244.38353377 | -3244.60588665 |
| ONEHAS_30 | -3244.38208145 | -3244.60409414 |
| ONEHAS_31 | -3244.38635711 | -3244.61205569 |
| ONEHAS_33 | -3244.40131212 | -3244.62495600 |
| ONEHAS_34 | -3244.38245547 | -3244.60442146 |
| UZEYAA_14 | -3891.83024091 | -3892.07160777 |
| UZEYAA_19 | -3891.83008407 | -3892.07012319 |
| UZEYAA_20 | -3891.84112263 | -3892.07972428 |
| UZEYAA_22 | -3891.83113304 | -3892.07100437 |
| UZEYAA_23 | -3891.84015508 | -3892.07572665 |
| UZEYAA_30 | -3891.83533515 | -3892.07400234 |
| UZEYAA_31 | -3891.83922215 | -3892.07743790 |
| UZEYAA_33 | -3891.83133269 | -3892.07168807 |
| UZEYAA_3  | -3891.83425407 | -3892.07288898 |
| UZEYAA_7  | -3891.84129394 | -3892.07888925 |
| ADULES_14 | -3092.51201732 | -3092.69304940 |
| ADULES_16 | -3092.52774329 | -3092.70314664 |
| ADULES_20 | -3092.52530924 | -3092.70151279 |
| ADULES_23 | -3092.51665397 | -3092.69640612 |
| ADULES_25 | -3092.51669377 | -3092.69508230 |
| ADULES_28 | -3092.50555616 | -3092.68821415 |
| ADULES_2  | -3092.52173770 | -3092.69886801 |
| ADULES_31 | -3092.51448295 | -3092.69242929 |
| ADULES_6  | -3092.51951173 | -3092.69592108 |
| ADULES_9  | -3092.51132739 | -3092.69093187 |
| AJOMIX_11 | -4476.60604917 | -4476.81202450 |
| AJOMIX_14 | -4476.60348911 | -4476.81010973 |
| AJOMIX_17 | -4476.60267220 | -4476.81039517 |
| AJOMIX_18 | -4476.60739914 | -4476.81403947 |
| AJOMIX_19 | -4476.60713589 | -4476.81409206 |
| AJOMIX_26 | -4476.60701163 | -4476.81387462 |
| AJOMIX_31 | -4476.60462004 | -4476.81035596 |
| AJOMIX_4  | -4476.60592395 | -4476.80938065 |
| AJOMIX_7  | -4476.60351552 | -4476.80952930 |
| AJOMIX_9  | -4476.60756533 | -4476.81400623 |
| FIYMEI_10 | -6434.49058795 | -6434.80956262 |
| FIYMEI_12 | -6434.48044361 | -6434.79860198 |
| FIYMEI_17 | -6434.48150501 | -6434.79525908 |
| FIYMEI_18 | -6434.47772465 | -6434.79617935 |
| FIYMEI_21 | -6434.47954657 | -6434.81717111 |
| FIYMEI_28 | -6434.47881272 | -6434.80670693 |
| FIYMEI_31 | -6434.48669340 | -6434.80573867 |
| FIYMEI_32 | -6434.47364428 | -6434.79594755 |
| FIYMEI_5  | -6434.47955659 | -6434.80067479 |
| FIYMEI_6  | -6434.48020046 | -6434.79970603 |
| QUHVAS_16 | -3411.99095636 | -3412.18980991 |
| QUHVAS_20 | -3411.98806832 | -3412.18811247 |
| QUHVAS_21 | -3411.98453617 | -3412.18689936 |
| QUHVAS_24 | -3411.97124149 | -3412.17404124 |

|           |                |                |
|-----------|----------------|----------------|
| QUHVAS_25 | -3411.98184796 | -3412.18497682 |
| QUHVAS_26 | -3411.97995692 | -3412.17903192 |
| QUHVAS_27 | -3411.97377877 | -3412.17897882 |
| QUHVAS_28 | -3411.99235346 | -3412.19024210 |
| QUHVAS_29 | -3411.96954857 | -3412.17393631 |
| QUHVAS_6  | -3411.98243012 | -3412.18372402 |
| FUDNIB_18 | -4541.58506057 | -4541.80985694 |
| FUDNIB_21 | -4541.58556205 | -4541.80770346 |
| FUDNIB_23 | -4541.58607438 | -4541.80607285 |
| FUDNIB_24 | -4541.58461327 | -4541.80242194 |
| FUDNIB_26 | -4541.58238413 | -4541.80499325 |
| FUDNIB_27 | -4541.58650860 | -4541.81286286 |
| FUDNIB_2  | -4541.58745213 | -4541.80775509 |
| FUDNIB_32 | -4541.58676239 | -4541.81300568 |
| FUDNIB_3  | -4541.58645492 | -4541.81243594 |
| FUDNIB_5  | -4541.58549864 | -4541.80523584 |
| LUFCIZ_25 | -3592.17307904 | -3592.42059437 |
| LUFCIZ_27 | -3592.16736935 | -3592.41030929 |
| LUFCIZ_28 | -3592.16649064 | -3592.41602369 |
| LUFCIZ_29 | -3592.16753941 | -3592.41892177 |
| LUFCIZ_2  | -3592.18077240 | -3592.43006424 |
| LUFCIZ_30 | -3592.16113583 | -3592.41396696 |
| LUFCIZ_32 | -3592.16062592 | -3592.41046575 |
| LUFCIZ_6  | -3592.17104859 | -3592.42273467 |
| LUFCIZ_9  | -3592.17379822 | -3592.42547364 |
| ROBHUN_10 | -5594.49325700 | -5594.70774467 |
| ROBHUN_12 | -5594.49457945 | -5594.70950435 |
| ROBHUN_13 | -5594.48992405 | -5594.70308577 |
| ROBHUN_14 | -5594.49696543 | -5594.71206300 |
| ROBHUN_29 | -5594.49617789 | -5594.71073301 |
| ROBHUN_2  | -5594.49655413 | -5594.71025193 |
| ROBHUN_34 | -5594.48978930 | -5594.70282712 |
| ROBHUN_3  | -5594.49595350 | -5594.70885132 |
| ROBHUN_4  | -5594.50058495 | -5594.71432033 |
| ROBHUN_8  | -5594.49378397 | -5594.70896207 |

**Table S8. T1/T2 diagnostic values for 10 compounds of 16OSTM10 database**

|        | T1    | T2    |
|--------|-------|-------|
| LUFCIZ | 0.011 | 0.063 |
| ONEHAS | 0.012 | 0.047 |
| ROBHUN | 0.012 | 0.058 |
| ADULES | 0.012 | 0.080 |
| AQINUK | 0.012 | 0.078 |
| AVIXIO | 0.013 | 0.071 |
| FUHWAG | 0.013 | 0.072 |
| OQOQOB | 0.013 | 0.073 |
| QUHVAS | 0.013 | 0.094 |
| WUDYOL | 0.017 | 0.093 |

### FOD plots

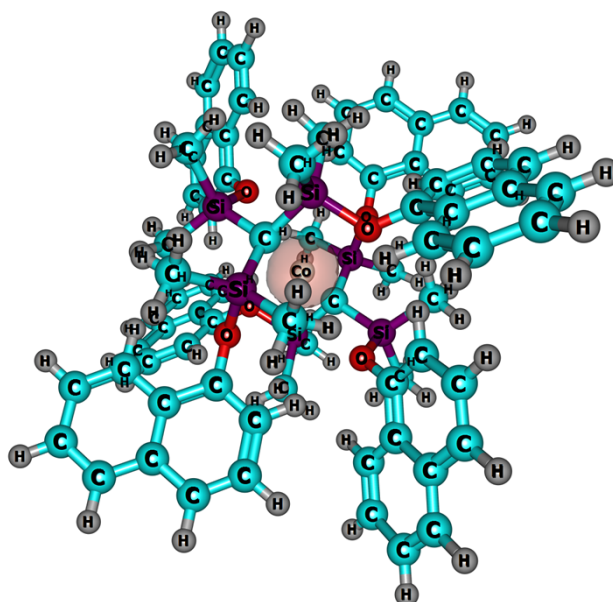

**Figure S1. Qualitative FOD diagnostics for FIYMEI. The isosurface value is  $\sigma = 0.005$  e/Bohr<sup>3</sup>.**

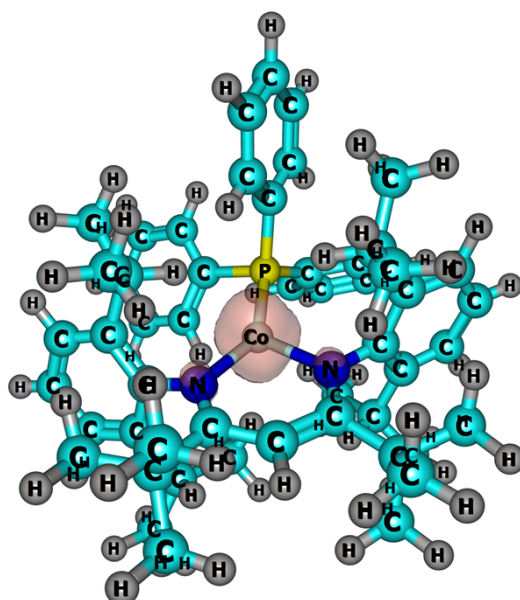

Figure S2. Qualitative FOD diagnostics for UZEYAA. The isosurface value is  $\sigma = 0.005$  e/Bohr<sup>3</sup>.

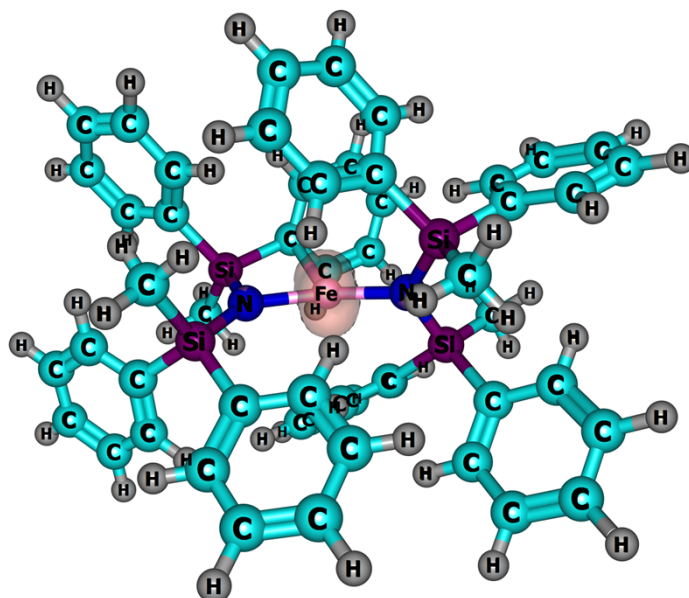

Figure S3. Qualitative FOD diagnostics for FUDNIB. The isosurface value is  $\sigma = 0.005$  e/Bohr<sup>3</sup>.

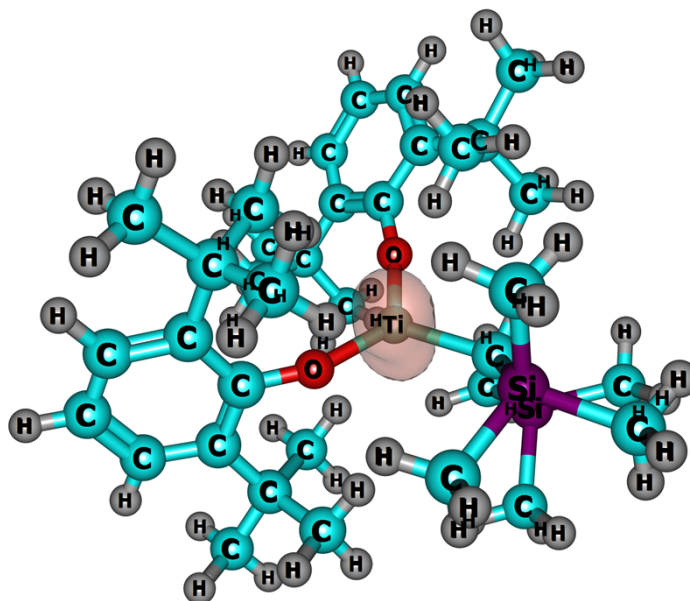

Figure S4. Qualitative FOD diagnostics for YIKLUC. The isosurface value is  $\sigma = 0.005$  e/Bohr<sup>3</sup>.

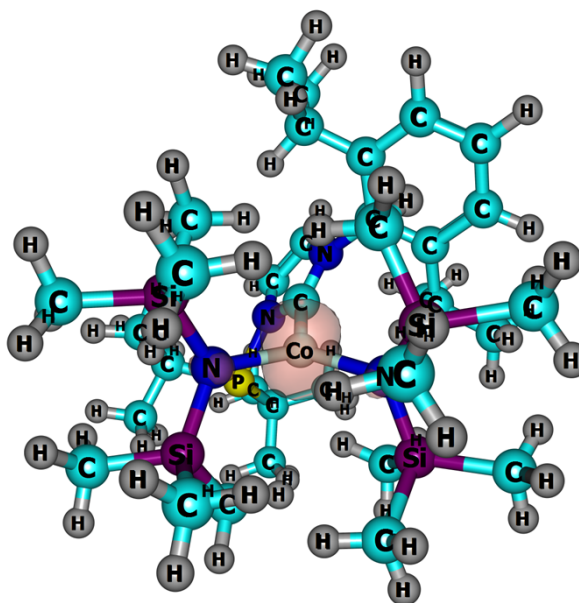



Figure S5. Qualitative FOD diagnostics for AJOMIX. The isosurface value is  $\sigma = 0.005$  e/Bohr<sup>3</sup>.

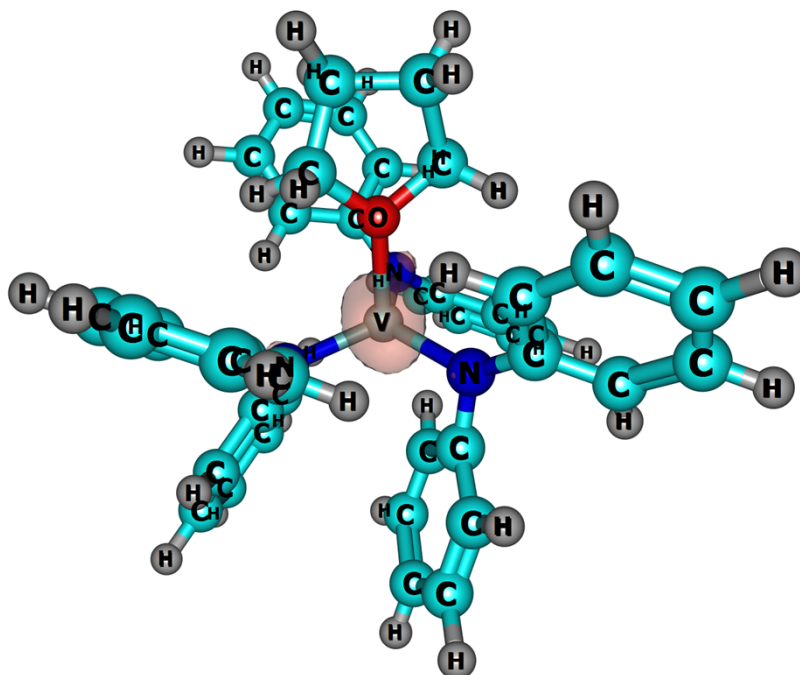

Figure S6. Qualitative FOD diagnostics for LIBLEN. The isosurface value is  $\sigma = 0.005$  e/Bohr<sup>3</sup>.

### Composition of the $\lambda_1$ and $\lambda_2$ basis sets used in the Priroda calculations

| Elements                   | Primitive and contracted functions         |
|----------------------------|--------------------------------------------|
| $\lambda_1$                |                                            |
| H                          | (6s2p) $\rightarrow$ [2s1p]                |
| B, C, N, O, F              | (10s7p3d) $\rightarrow$ [3s2p1d]           |
| Al, Si, P, S, Cl           | (14s11p3d) $\rightarrow$ [4s3p1d]          |
| Ti, V, Cr, Fe, Co, Cu      | (19s15p11d5f) $\rightarrow$ [6s5p3d1f]     |
| Br                         | (19s15p11d) $\rightarrow$ [5s4p2d]         |
| $\lambda_2$                |                                            |
| H                          | (8s4p2d) $\rightarrow$ [3s2p1d]            |
| B, C, N, O, F              | (12s8p4d2f) $\rightarrow$ [4s3p2d1f]       |
| Al, Si, P, S, Cl           | (18s13p5d2f) $\rightarrow$ [5s4p2d1f]      |
| Ti, V, Cr, Fe, Co, Cu      | (23s18p13d8f4g) $\rightarrow$ [8s7p5d3f1g] |
| Br                         | (23s18p13d2f) $\rightarrow$ [6s5p3d1f]     |
| $\lambda_1$ (relativistic) |                                            |
| H                          | (6s2p) $\rightarrow$ [2s1p]                |
| B, C, N, O, F              | (10s7p3d) $\rightarrow$ [3s2p1d]           |
| Al, Si, P, S, Cl           | (15s11p3d) $\rightarrow$ [4s3p1d]          |
| Ti, V, Cr, Fe, Co, Cu      | (21s16p11d5f) $\rightarrow$ [6s5p3d1f]     |
| Br                         | (21s17p11d) $\rightarrow$ [5s4p2d]         |
| $\lambda_2$ (relativistic) |                                            |
| H                          | (8s4p2d) $\rightarrow$ [3s2p1d]            |
| B, C, N, O, F              | (12s8p4d2f) $\rightarrow$ [4s3p2d1f]       |
| Al, Si, P, S, Cl           | (19s13p5d2f) $\rightarrow$ [5s4p2d1f]      |
| Ti, V, Cr, Fe, Co, Cu      | (25s20p14d8f4g) $\rightarrow$ [8s7p5d3f1g] |
| Br                         | (25s21p14d2f) $\rightarrow$ [6s5p3d1f]     |

# Tabulated absolute conformational energies and optimized Cartesian coordinates for the compounds of 16OSTM10 database.

## ADULES

Conformation 14.

Multiplicity: 4

Charge: 0

E(B97-3c) = -3093.966599795127 Hartree

E(M06/def2-TZVP) = -3093.636197040315 Hartree

E(PBE - D3(BJ)/def2-TZVP) = -3092.607314558257 Hartree

E(PBE0 - D3(BJ)/def2-TZVP) = -3092.835883758034 Hartree

E(PBEh-3c) = -3089.871015364763 Hartree

E(PM6) = 12.97362 Kcal/mol

E(PM7) = 12.80835 Kcal/mol

E( $\omega$ B97X-V/def2-TZVP) = -3095.693463217948 Hartree

E(GFN1-xTB) = -132.177647242737 Hartree

E(GFN2-xTB) = -130.925202510276 Hartree

E(GFN-FF) = -18.182891646888 Hartree

Coordinates:

|    |           |           |           |
|----|-----------|-----------|-----------|
| Co | -0.524023 | 0.313364  | -0.282308 |
| C  | -2.133803 | 1.496291  | -0.467672 |
| H  | -1.885718 | 2.421581  | -1.037301 |
| H  | -2.737215 | 0.868477  | -1.165412 |
| C  | -2.960112 | 1.852405  | 0.768044  |
| H  | -3.914745 | 2.347536  | 0.460819  |
| H  | -3.283656 | 0.922686  | 1.283221  |
| C  | -2.241343 | 2.774228  | 1.759163  |
| H  | -1.892325 | 3.668343  | 1.197422  |
| H  | -1.312586 | 2.279700  | 2.111553  |
| C  | -3.047517 | 3.251715  | 2.977195  |
| H  | -2.527274 | 4.140281  | 3.395558  |
| H  | -4.046778 | 3.618969  | 2.646296  |
| C  | -3.230838 | 2.248123  | 4.129660  |
| H  | -3.564957 | 2.813945  | 5.026994  |
| H  | -2.233387 | 1.832789  | 4.398267  |
| C  | -4.221634 | 1.104073  | 3.893184  |
| H  | -5.209805 | 1.490946  | 3.566660  |
| H  | -4.383751 | 0.516331  | 4.820223  |
| H  | -3.877448 | 0.396101  | 3.113341  |
| N  | -0.193693 | -1.125092 | -1.564675 |
| N  | 1.261664  | 0.452191  | 0.491321  |
| C  | 1.172595  | -3.136628 | -2.400775 |
| C  | 0.966794  | -1.789674 | -1.625786 |
| C  | 2.081135  | -1.382393 | -0.846847 |
| H  | 2.970236  | -1.992633 | -1.008613 |
| C  | 2.257583  | -0.379150 | 0.141297  |
| C  | 3.714114  | -0.322241 | 0.722379  |
| C  | 0.118053  | -3.461210 | -3.476531 |
| H  | 0.385397  | -4.430334 | -3.945119 |
| H  | 0.077745  | -2.701035 | -4.276030 |
| H  | -0.899252 | -3.561911 | -3.064004 |
| C  | 2.554657  | -3.189671 | -3.095874 |
| H  | 2.632155  | -4.125965 | -3.684598 |
| H  | 3.402319  | -3.187106 | -2.384218 |
| H  | 2.694836  | -2.339826 | -3.792481 |
| C  | 1.117613  | -4.256407 | -1.329418 |
| H  | 1.255726  | -5.248237 | -1.808515 |
| H  | 0.139735  | -4.264463 | -0.809129 |
| H  | 1.906917  | -4.126367 | -0.563122 |
| C  | 4.635564  | 0.161935  | -0.424048 |
| H  | 5.686728  | 0.218005  | -0.071993 |
| H  | 4.336170  | 1.172173  | -0.769264 |
| H  | 4.598871  | -0.515881 | -1.298575 |
| C  | 4.153855  | -1.733521 | 1.185755  |
| H  | 3.460877  | -2.130136 | 1.955512  |
| H  | 5.165451  | -1.677084 | 1.637105  |
| H  | 4.201937  | -2.470665 | 0.362276  |
| C  | 3.942461  | 0.607754  | 1.929271  |
| H  | 3.358359  | 0.301635  | 2.816456  |
| H  | 3.701488  | 1.663132  | 1.720189  |
| H  | 5.016559  | 0.557527  | 2.201671  |
| C  | -1.329529 | -1.191209 | -2.407251 |
| C  | -1.378847 | -0.376396 | -3.579841 |
| C  | -2.558004 | -0.399984 | -4.348459 |
| H  | -2.601337 | 0.218870  | -5.259371 |
| C  | -3.673491 | -1.160411 | -3.977066 |
| H  | -4.582161 | -1.152192 | -4.597417 |
| C  | -3.631248 | -1.903568 | -2.791816 |
| H  | -4.517519 | -2.477101 | -2.478042 |
| C  | -2.479099 | -1.926152 | -1.988248 |

|   |           |           |           |
|---|-----------|-----------|-----------|
| C | -0.250105 | 0.535799  | -4.074476 |
| H | -0.763873 | 1.247450  | -4.756630 |
| C | 0.792684  | -0.201098 | -4.931942 |
| H | 0.316835  | -0.807591 | -5.728421 |
| H | 1.416539  | -0.872134 | -4.310604 |
| H | 1.474901  | 0.527122  | -5.417566 |
| C | 0.450869  | 1.396366  | -3.012058 |
| H | -0.276842 | 1.891299  | -2.339416 |
| H | 1.037861  | 2.198291  | -3.506303 |
| H | 1.159806  | 0.809979  | -2.395038 |
| C | -2.488712 | -2.708615 | -0.679725 |
| H | -1.467590 | -2.636781 | -0.249650 |
| C | -2.807603 | -4.199331 | -0.885013 |
| H | -2.117054 | -4.674421 | -1.609518 |
| H | -3.840494 | -4.344316 | -1.263772 |
| H | -2.727442 | -4.750555 | 0.074456  |
| C | -3.465796 | -2.079235 | 0.329026  |
| H | -3.227010 | -1.013610 | 0.509993  |
| H | -3.429388 | -2.611091 | 1.302246  |
| H | -4.509958 | -2.126696 | -0.043150 |
| C | 1.210134  | 1.359027  | 1.580302  |
| C | 0.843076  | 0.843744  | 2.870175  |
| C | 0.721206  | 1.779623  | 3.929786  |
| H | 0.447976  | 1.414599  | 4.930645  |
| C | 0.938092  | 3.152000  | 3.732622  |
| H | 0.834320  | 3.852825  | 4.574451  |
| H | 1.272801  | 3.625259  | 2.458670  |
| C | 1.432264  | 4.704286  | 2.307020  |
| C | 1.414087  | 2.751100  | 1.365505  |
| C | 0.530905  | -0.612974 | 3.044842  |
| H | 1.177417  | -1.170619 | 2.335994  |
| C | -0.926774 | -0.888373 | 2.636852  |
| H | -1.135867 | -1.973474 | 2.550979  |
| H | -1.174833 | -0.412112 | 1.656423  |
| H | -1.634891 | -0.446111 | 3.366475  |
| C | 0.815389  | -1.155293 | 4.449636  |
| H | 0.665530  | -2.253540 | 4.476553  |
| H | 0.135835  | -0.717177 | 5.209427  |
| H | 1.857514  | -0.943205 | 4.763664  |
| C | 1.794549  | 3.293760  | -0.006493 |
| H | 1.864000  | 2.421809  | -0.687888 |
| C | 0.711082  | 4.234078  | -0.559190 |
| H | -0.274651 | 3.732425  | -0.586230 |
| H | 0.962707  | 4.561167  | -1.588980 |
| H | 0.609586  | 5.143800  | 0.068567  |
| C | 3.166170  | 3.990625  | 0.005303  |
| H | 3.967192  | 3.321125  | 0.376908  |
| H | 3.158239  | 4.892654  | 0.652057  |
| H | 3.444819  | 4.318072  | -1.017528 |

Conformation 16.

Multiplicity: 4

Charge: 0

E(B97-3c) = -3093.978690751810 Hartree

E(M06/def2-TZVP) = -3093.642591378878 Hartree

E(PBE - D3(BJ)/def2-TZVP) = -3092.617752475290 Hartree

E(PBE0 - D3(BJ)/def2-TZVP) = -3092.841386704271 Hartree

E(PBEh-3c) = -3089.876407988302 Hartree

E(PM6) = 2.70757 Kcal/mol

E(PM7) = 7.79350 Kcal/mol

E( $\omega$ B97X-V/def2-TZVP) = -3095.703850570486 Hartree

E(GFN1-xTB) = -132.188639001650 Hartree

E(GFN2-xTB) = -130.938520100297 Hartree

E(GFN-FF) = -18.195611646942 Hartree

Coordinates:

|    |           |           |           |
|----|-----------|-----------|-----------|
| Co | -0.083465 | 0.571433  | -0.016518 |
| C  | -1.800136 | 1.560192  | 0.155315  |
| H  | -1.565215 | 2.246802  | 1.006881  |
| H  | -1.900516 | 2.206356  | -0.746340 |
| C  | -3.073567 | 0.722835  | 0.436997  |
| H  | -3.318847 | 0.122016  | -0.432285 |
| H  | -2.901365 | 0.075823  | 1.284263  |
| C  | -4.300600 | 1.647972  | 0.749746  |
| H  | -4.471405 | 2.341815  | -0.102629 |
| H  | -4.066228 | 2.298523  | 1.623695  |
| C  | -5.585162 | 0.857775  | 1.033978  |
| H  | -6.446753 | 1.560979  | 1.083726  |
| H  | -5.798140 | 0.184001  | 0.172055  |
| C  | -5.548256 | 0.026184  | 2.321303  |
| H  | -5.325270 | 0.700382  | 3.179163  |
| H  | -4.699695 | -0.689393 | 2.280543  |

|   |           |           |           |                                                            |           |           |           |
|---|-----------|-----------|-----------|------------------------------------------------------------|-----------|-----------|-----------|
| C | -6.843769 | -0.740114 | 2.588916  | H                                                          | -1.362398 | -1.294019 | -1.222027 |
| H | -7.712748 | -0.054270 | 2.678191  | H                                                          | -2.809163 | -2.348889 | -1.187060 |
| H | -6.787415 | -1.331118 | 3.526013  | H                                                          | -1.445828 | -2.732425 | -2.297303 |
| H | -7.069823 | -1.447493 | 1.763092  |                                                            |           |           |           |
| N | 1.357685  | 0.848207  | -1.248164 | Conformation 2.                                            |           |           |           |
| N | 0.575051  | -1.022831 | 0.839738  | Multiplicity: 4                                            |           |           |           |
| C | 3.610446  | 0.257804  | -2.346332 | Charge: 0                                                  |           |           |           |
| C | 2.453494  | 0.076663  | -1.310169 | E(B97-3c) = -3093.973738702698 Hartree                     |           |           |           |
| C | 2.614237  | -1.024329 | -0.430809 | E(M06/def2-TZVP) = -3093.639519811665 Hartree              |           |           |           |
| H | 3.555048  | -1.564362 | -0.563563 | E(PBE - D3(BJ)/def2-TZVP) = -3092.613358754087 Hartree     |           |           |           |
| C | 1.771055  | -1.572780 | 0.568709  | E(PBE0 - D3(BJ)/def2-TZVP) = -3092.837677445571 Hartree    |           |           |           |
| C | 2.383034  | -2.806448 | 1.318911  | E(PBEh-3c) = -3089.872596617491 Hartree                    |           |           |           |
| C | 3.613275  | -0.985225 | -3.269076 | E(PM6) = 6.30908 Kcal/mol                                  |           |           |           |
| H | 4.432803  | -0.904604 | -4.013155 | E(PM7) = 12.43891 Kcal/mol                                 |           |           |           |
| H | 2.656427  | -1.067194 | -3.823012 | E( $\omega$ B97X-V/def2-TZVP) = -3095.698706379848 Hartree |           |           |           |
| H | 3.756649  | -1.925975 | -2.703200 | E(GFN1-xTB) = -132.180979669625 Hartree                    |           |           |           |
| C | 3.519960  | 1.503005  | -3.248019 | E(GFN2-xTB) = -130.930810468457 Hartree                    |           |           |           |
| H | 4.383408  | 1.487715  | -3.943989 | E(GFN-FF) = -18.191079778321 Hartree                       |           |           |           |
| H | 3.570489  | 2.446513  | -2.675606 |                                                            |           |           |           |
| H | 2.600690  | 1.532924  | -3.858428 | Coordinates:                                               |           |           |           |
| C | 4.960290  | 0.353733  | -1.594062 | Co                                                         | 0.452602  | 0.297322  | 0.045668  |
| H | 5.782290  | 0.515453  | -2.321194 | C                                                          | 0.782289  | 2.247110  | -0.224105 |
| H | 5.200268  | -0.560524 | -1.018598 | H                                                          | 0.724814  | 2.728845  | 0.777499  |
| H | 4.958957  | 1.208070  | -0.887031 | H                                                          | 1.863152  | 2.279272  | -0.510358 |
| C | 1.523232  | -3.403488 | 2.449873  | C                                                          | -0.082912 | 2.963848  | -1.250804 |
| H | 2.118385  | -4.188463 | 2.959526  | H                                                          | -0.042824 | 2.431923  | -2.226364 |
| H | 0.595477  | -3.875897 | 2.082546  | H                                                          | -1.145058 | 2.909470  | -0.942683 |
| H | 1.236939  | -2.655591 | 3.210739  | C                                                          | 0.309133  | 4.433009  | -1.501086 |
| C | 3.721361  | -2.358298 | 1.961873  | H                                                          | 1.387384  | 4.451346  | -1.774358 |
| H | 4.456497  | -2.008253 | 1.212712  | H                                                          | 0.237601  | 5.007606  | -0.549015 |
| H | 4.175168  | -3.209252 | 2.510293  | C                                                          | -0.498881 | 5.142330  | -2.603896 |
| H | 3.562539  | -1.533511 | 2.685006  | H                                                          | 0.127732  | 5.948315  | -3.043449 |
| C | 2.671962  | -3.940717 | 0.306104  | H                                                          | -0.682372 | 4.420485  | -3.432772 |
| C | 3.378914  | -3.629515 | -0.486964 | C                                                          | -1.833451 | 5.778262  | -2.181363 |
| H | 1.741939  | -4.288671 | -0.186121 | H                                                          | -2.245591 | 6.324088  | -3.058630 |
| H | 3.117942  | -4.808720 | 0.833930  | H                                                          | -1.631268 | 6.560404  | -1.415118 |
| C | 1.008047  | 2.032142  | -1.944453 | C                                                          | -2.904369 | 4.820538  | -1.650602 |
| C | 1.457341  | 3.294876  | -1.449282 | H                                                          | -2.621879 | 4.385617  | -0.670829 |
| C | 0.988059  | 4.461602  | -2.072976 | H                                                          | -3.071975 | 3.973202  | -2.348104 |
| H | 1.325697  | 5.441842  | -1.705143 | H                                                          | -3.873212 | 5.342192  | -1.509668 |
| C | 0.097054  | 4.402821  | -3.154538 | N                                                          | -0.456994 | -1.061210 | -0.973291 |
| H | -0.257814 | 5.330472  | -3.628232 | N                                                          | 0.880642  | -0.752269 | 1.596932  |
| C | -0.342032 | 3.159442  | -3.624296 | C                                                          | -1.235780 | -3.444918 | -1.467223 |
| H | -1.045102 | 3.116625  | -4.470700 | C                                                          | -0.555957 | -2.350262 | -0.576229 |
| C | 0.092827  | 1.959245  | -3.034644 | C                                                          | -0.027224 | -2.769490 | 0.666297  |
| C | 2.389459  | 3.368613  | -0.244423 | H                                                          | -0.171449 | -3.826557 | 0.884218  |
| H | 2.951073  | 2.412240  | -0.203881 | C                                                          | 0.622464  | -2.059703 | 1.714227  |
| C | 1.574363  | 3.458089  | 1.058560  | C                                                          | 0.915279  | -2.914124 | 2.991109  |
| H | 0.886357  | 2.590797  | 1.141345  | C                                                          | -1.079897 | -4.863869 | -0.878482 |
| H | 0.958575  | 4.380611  | 1.082205  | H                                                          | -1.535707 | -5.590480 | -1.580510 |
| H | 2.237318  | 3.453778  | 1.948411  | H                                                          | -1.599560 | -4.980635 | 0.093155  |
| C | 3.418885  | 4.502770  | -0.334438 | H                                                          | -0.017443 | -5.148995 | -0.747067 |
| H | 3.990641  | 4.462207  | -1.283785 | C                                                          | -2.751007 | -3.191640 | -1.625822 |
| H | 4.140791  | 4.434517  | 0.504562  | H                                                          | -3.202161 | -4.028218 | -2.198259 |
| H | 2.942661  | 5.502729  | -0.270255 | H                                                          | -2.963982 | -2.259997 | -2.179522 |
| C | -0.409651 | 0.622162  | -3.567767 | H                                                          | -3.257735 | -3.144031 | -0.641483 |
| H | 0.019948  | -0.168353 | -2.918707 | C                                                          | -0.585864 | -3.469603 | -2.865855 |
| C | 0.072910  | 0.365196  | -5.005814 | H                                                          | -1.006126 | -4.310146 | -3.455033 |
| H | 1.177197  | 0.414917  | -5.084634 | H                                                          | 0.510811  | -3.614299 | -2.799745 |
| H | -0.344643 | 1.113496  | -5.711245 | H                                                          | -0.784396 | -2.540459 | -3.427503 |
| H | -0.248540 | -0.638189 | -5.353844 | C                                                          | 1.705780  | -2.207367 | 4.108292  |
| C | -1.940368 | 0.513341  | -3.473358 | H                                                          | 1.784434  | -2.901953 | 4.969433  |
| H | -2.282560 | 0.666647  | -2.432326 | H                                                          | 1.214580  | -1.286807 | 4.466230  |
| H | -2.283387 | -0.487762 | -3.805356 | H                                                          | 2.733714  | -1.939746 | 3.804119  |
| C | -2.441364 | 1.268930  | -4.113228 | C                                                          | 1.719715  | -4.178557 | 2.605499  |
| H | -0.489425 | -1.497362 | 1.642317  | H                                                          | 1.179679  | -4.837703 | 1.899696  |
| C | -0.820309 | -0.792560 | 2.839274  | H                                                          | 1.935758  | -4.772427 | 3.517087  |
| C | -1.906900 | -1.249118 | 3.605272  | H                                                          | 2.689539  | -3.907100 | 2.141133  |
| H | -2.166110 | -0.726852 | 4.537578  | C                                                          | -0.453283 | -3.333537 | 3.584496  |
| C | -2.677464 | -2.343796 | 3.193626  | H                                                          | -1.051082 | -3.930149 | 2.868983  |
| H | -3.521636 | -2.688248 | 3.809562  | H                                                          | -1.051643 | -2.442877 | 3.862637  |
| C | -2.390699 | -2.978517 | 1.976209  | H                                                          | -0.299636 | -3.943775 | 4.498491  |
| H | -3.026140 | -3.810907 | 1.640419  | C                                                          | -1.063842 | -0.396082 | -2.073084 |
| C | -1.311709 | -2.569312 | 1.176766  | C                                                          | -0.301747 | -0.117436 | -3.250338 |
| C | -0.026956 | 0.440280  | 3.254565  | C                                                          | -0.888583 | 0.666519  | -4.260271 |
| H | 0.342634  | 0.886083  | 2.301223  | H                                                          | -0.309454 | 0.888795  | -5.169619 |
| C | 1.212940  | 0.095176  | 4.094199  | C                                                          | -2.183757 | 1.180270  | -4.128269 |
| H | 1.776988  | 1.014827  | 4.353668  | H                                                          | -2.620690 | 1.794519  | -4.929896 |
| H | 1.901132  | -0.577010 | 3.547885  | C                                                          | -2.915991 | 0.918474  | -2.962645 |
| H | 0.924054  | -0.407342 | 5.041054  | H                                                          | -3.927235 | 1.337921  | -2.854850 |
| C | -0.883151 | 1.505496  | 3.949477  | C                                                          | -2.382100 | 0.142035  | -1.920715 |
| H | -0.305534 | 2.446152  | 4.056233  | C                                                          | 1.140864  | -0.590430 | -3.408263 |
| H | -1.189569 | 1.195070  | 4.970099  | H                                                          | 1.332516  | -1.328976 | -2.603041 |
| H | -1.802226 | 1.731472  | 3.372551  | C                                                          | 2.123391  | 0.576338  | -3.203682 |
| C | -1.050297 | -3.198602 | -0.186192 | H                                                          | 1.985840  | 1.040274  | -2.209797 |
| H | 0.042976  | -3.155201 | -0.363086 | H                                                          | 1.972676  | 1.364324  | -3.970382 |
| C | -1.469141 | -4.669440 | -0.288178 | H                                                          | 3.172656  | 0.232224  | -3.274828 |
| H | -1.020948 | -5.281244 | 0.521220  | C                                                          | 1.406139  | -1.270303 | -4.761832 |
| H | -1.140766 | -5.093230 | -1.258822 | H                                                          | 0.697869  | -2.097172 | -4.961259 |
| H | -2.570039 | -4.794131 | -0.237868 | H                                                          | 2.434450  | -1.685183 | -4.788210 |
| C | -1.704594 | -2.348300 | -1.288992 | H                                                          | 1.325527  | -0.548850 | -5.600873 |

|   |           |           |           |   |           |           |           |
|---|-----------|-----------|-----------|---|-----------|-----------|-----------|
| C | -3.165844 | -0.054508 | -0.625085 | H | -2.074804 | 4.432972  | 0.187823  |
| H | -2.768585 | -0.966388 | -0.138671 | C | -1.362204 | 3.408797  | 3.460578  |
| C | -4.671483 | -0.256516 | -0.841239 | H | -1.464575 | 4.405208  | 3.937488  |
| H | -4.881762 | -1.066338 | -1.567943 | H | -0.536582 | 2.873505  | 3.971451  |
| H | -5.162303 | 0.666837  | -1.211955 | H | -2.297602 | 2.848437  | 3.651185  |
| H | -5.163389 | -0.519273 | 0.117325  | C | -4.845190 | 0.386093  | 1.050354  |
| C | -2.904939 | 1.108423  | 0.345750  | H | -5.814109 | -0.041316 | 1.380869  |
| H | -1.814014 | 1.237480  | 0.510549  | H | -4.890352 | 0.518171  | -0.049788 |
| H | -3.383295 | 0.918353  | 1.328452  | H | -4.751515 | 1.389483  | 1.507672  |
| H | -3.303575 | 2.062833  | -0.054707 | C | -3.623005 | -0.702032 | 2.985265  |
| C | 1.642186  | 0.126786  | 2.405581  | H | -2.789091 | -1.366259 | 3.285031  |
| C | 0.977053  | 1.099327  | 3.209227  | H | -4.566504 | -1.136307 | 3.374265  |
| C | 1.760020  | 2.042930  | 3.898224  | H | -3.467751 | 0.277314  | 3.481403  |
| H | 1.261104  | 2.793397  | 4.530507  | C | -4.055851 | -1.953916 | 0.875545  |
| C | 3.155373  | 2.046411  | 3.796143  | H | -3.312275 | -2.730645 | 1.124120  |
| H | 3.748508  | 2.795961  | 4.341257  | H | -4.171412 | -1.943054 | -0.223023 |
| C | 3.797036  | 1.090548  | 2.994258  | H | -5.026536 | -2.265986 | 1.311785  |
| H | 4.893971  | 1.100393  | 2.920563  | C | 1.431651  | 2.332506  | 0.415011  |
| C | 3.067971  | 0.122874  | 2.286407  | C | 2.395195  | 2.213032  | 1.463960  |
| C | -0.540148 | 1.107297  | 3.368154  | C | 3.693589  | 2.693438  | 1.236020  |
| H | -0.949398 | 0.407160  | 2.610788  | H | 4.444919  | 2.615081  | 2.035582  |
| C | -1.154027 | 2.491377  | 3.102883  | C | 4.053856  | 3.276808  | 0.007915  |
| H | -2.260136 | 2.440447  | 3.159377  | H | 5.076832  | 3.642118  | -0.147307 |
| H | -0.881542 | 2.872140  | 2.100059  | C | 3.111803  | 3.346027  | -1.024801 |
| H | -0.820165 | 3.237572  | 3.853065  | H | 3.405201  | 3.777467  | -1.993687 |
| C | -0.962008 | 0.596215  | 4.758384  | C | 1.798072  | 2.875030  | -0.853359 |
| H | -2.067737 | 0.565699  | 4.845955  | C | 2.025521  | 1.516294  | 2.767731  |
| H | -0.577829 | 1.260995  | 5.559944  | H | 0.938278  | 1.668136  | 2.923723  |
| H | -0.578454 | -0.422996 | 4.959126  | C | 2.746686  | 2.074146  | 4.000027  |
| C | 3.763208  | -0.900684 | 1.393627  | H | 2.609586  | 3.170700  | 4.095066  |
| H | 3.180694  | -1.843224 | 1.466035  | H | 3.837049  | 1.871113  | 3.970437  |
| C | 3.709302  | -0.470570 | -0.082023 | H | 2.354795  | 1.598752  | 4.922007  |
| H | 2.655321  | -0.336379 | -0.410027 | C | 2.240168  | -0.000175 | 2.626038  |
| H | 4.170367  | -1.235768 | -0.739737 | H | 1.707601  | -0.383812 | 1.731000  |
| H | 4.237115  | 0.492428  | -0.238659 | H | 1.863310  | -0.545381 | 3.515806  |
| C | 5.200007  | -1.221627 | 1.821362  | H | 3.316336  | -0.238649 | 2.499347  |
| H | 5.257244  | -1.510213 | 2.890442  | C | 0.789794  | 2.954764  | -1.993628 |
| H | 5.880390  | -0.359137 | 1.665762  | H | -0.025997 | 2.242748  | -1.736918 |
| H | 5.598848  | -2.060804 | 1.216723  | C | 1.377166  | 2.505103  | -3.339182 |

Conformation 20.

Multiplicity: 4

Charge: 0

E(B97-3c) = -3093.976593267044 Hartree

E(M06/def2-TZVP) = -3093.641615779439 Hartree

E(PBE - D3(BJ)/def2-TZVP) = -3092.615921271834 Hartree

E(PBE0 - D3(BJ)/def2-TZVP) = -3092.839263194862 Hartree

E(PBEh-3c) = -3089.875640250264 Hartree

E(PM6) = 4.82982 Kcal/mol

E(PM7) = 9.45028 Kcal/mol

E( $\omega$ B97X-V/def2-TZVP) = -3095.701208591396 Hartree

E(GFN1-xTB) = -132.186815486466 Hartree

E(GFN2-xTB) = -130.935427281578 Hartree

E(GFN-FF) = -18.195490242084 Hartree

Coordinates:

|    |           |           |           |
|----|-----------|-----------|-----------|
| Co | 0.240518  | 0.095806  | -0.354780 |
| C  | 1.647642  | -0.838363 | -1.396767 |
| H  | 1.316596  | -1.898850 | -1.344256 |
| H  | 1.443900  | -0.496887 | -2.442000 |
| C  | 3.124062  | -0.686425 | -1.058468 |
| H  | 3.410733  | 0.388065  | -1.079016 |
| H  | 3.300141  | -1.013919 | -0.009458 |
| C  | 4.095247  | -1.476103 | -1.963819 |
| H  | 5.131309  | -1.242336 | -1.634972 |
| H  | 4.019930  | -1.098734 | -3.009165 |
| C  | 3.891193  | -3.004023 | -1.954568 |
| H  | 4.871999  | -3.512957 | -2.084651 |
| H  | 3.533003  | -3.314349 | -0.945668 |
| C  | 2.929024  | -3.549652 | -3.019399 |
| H  | 3.347114  | -3.329238 | -4.027169 |
| H  | 1.964807  | -3.002135 | -2.970571 |
| C  | 2.665621  | -5.048939 | -2.881545 |
| H  | 3.606312  | -5.636920 | -2.938667 |
| H  | 1.986841  | -5.422741 | -3.675017 |
| H  | 2.191037  | -5.280123 | -1.904393 |
| N  | 0.142877  | 1.768822  | 0.573120  |
| N  | -1.440368 | -0.634213 | 0.205192  |
| C  | -1.065339 | 3.580789  | 1.951799  |
| C  | -0.924642 | 2.175282  | 1.278199  |
| C  | -2.061791 | 1.338879  | 1.418706  |
| H  | -2.867818 | 1.777790  | 2.012422  |
| C  | -2.333654 | 0.025572  | 0.957987  |
| C  | -3.693498 | -0.569641 | 1.444153  |
| C  | 0.158414  | 4.508136  | 1.831316  |
| H  | -0.105338 | 5.489697  | 2.275112  |
| H  | 0.461873  | 4.684970  | 0.784271  |
| H  | 1.042059  | 4.125448  | 2.371277  |
| C  | -2.255387 | 4.306483  | 1.274201  |
| H  | -2.386048 | 5.314505  | 1.719392  |
| H  | -3.208427 | 3.756386  | 1.392600  |

Conformation 23.

Multiplicity: 4

Charge: 0

E(B97-3c) = -3093.970677203439 Hartree

E(M06/def2-TZVP) = -3093.639284805517 Hartree

E(PBE - D3(BJ)/def2-TZVP) = -3092.610637005292 Hartree

E(PBE0 - D3(BJ)/def2-TZVP) = -3092.836393850187 Hartree

E(PBEh-3c) = -3089.875041409444 Hartree

E(PM6) = 9.33738 Kcal/mol

E(PM7) = 12.06737 Kcal/mol

E( $\omega$ B97X-V/def2-TZVP) = -3095.695327704533 Hartree

E(GFN1-xTB) = -132.181176917506 Hartree

E(GFN2-xTB) = -130.928819096395 Hartree

E(GFN-FF) = -18.190447927935 Hartree

## Coordinates:

|    |           |           |           |
|----|-----------|-----------|-----------|
| Co | 0.005793  | -0.482125 | 0.506378  |
| C  | -1.132498 | -2.122092 | 0.358039  |
| H  | -1.012718 | -2.498634 | -0.681105 |
| H  | -0.599881 | -2.858785 | 1.010866  |
| C  | -2.600778 | -2.014028 | 0.757400  |
| H  | -2.687087 | -1.607029 | 1.786544  |
| H  | -3.111371 | -1.261010 | 0.121187  |
| C  | -3.398543 | -3.332832 | 0.701978  |
| H  | -4.432429 | -3.134405 | 1.063153  |
| H  | -2.960215 | -4.054053 | 1.427138  |
| C  | -3.456889 | -4.003914 | -0.679198 |
| H  | -2.447710 | -4.389606 | -0.941629 |
| H  | -4.113529 | -4.900034 | -0.611394 |
| C  | -3.947968 | -3.105764 | -1.825714 |
| H  | -3.973454 | -3.708160 | -2.759803 |
| H  | -3.199462 | -2.306525 | -2.012278 |
| C  | -5.318760 | -2.464806 | -1.596680 |
| H  | -5.658293 | -1.904356 | -2.491833 |
| H  | -5.302156 | -1.749349 | -0.748614 |
| H  | -6.092291 | -3.228742 | -1.368787 |
| N  | -0.390104 | 1.368448  | 0.858008  |
| N  | 1.725770  | -0.270607 | -0.325131 |
| C  | 0.170223  | 3.896082  | 0.783224  |
| C  | 0.462696  | 2.369270  | 0.571684  |
| C  | 1.746580  | 2.100844  | 0.036424  |
| H  | 2.366304  | 2.991013  | -0.088187 |
| C  | 2.366733  | 0.905717  | -0.410517 |
| C  | 3.832508  | 1.096577  | -0.931721 |
| C  | -1.168112 | 4.245105  | 1.462668  |
| H  | -1.206620 | 5.344527  | 1.604324  |
| H  | -1.281229 | 3.775330  | 2.456227  |
| H  | -2.046568 | 3.956360  | 0.860945  |
| C  | 1.288313  | 4.512013  | 1.663898  |
| H  | 1.067536  | 5.584810  | 1.839104  |
| H  | 2.288600  | 4.454126  | 1.194366  |
| H  | 1.348634  | 4.010622  | 2.649101  |
| C  | 0.186609  | 4.594804  | -0.598575 |
| H  | 0.004161  | 5.682150  | -0.472389 |
| H  | -0.605092 | 4.194559  | -1.261276 |
| H  | 1.156023  | 4.469020  | -1.118472 |
| C  | 3.884256  | 2.248834  | -1.966541 |
| H  | 4.918393  | 2.347099  | -2.354685 |
| H  | 3.600340  | 3.229320  | -1.539697 |
| H  | 3.216614  | 2.050672  | -2.828404 |
| C  | 4.475617  | -0.130484 | -1.607210 |
| H  | 4.618400  | -0.979433 | -0.917787 |
| H  | 5.476023  | 0.166395  | -1.982881 |
| H  | 3.890261  | -0.497816 | -2.469076 |
| C  | 4.708459  | 1.483655  | 0.286453  |
| H  | 4.709648  | 0.680032  | 1.048531  |
| H  | 4.347706  | 2.410831  | 0.772625  |
| H  | 5.757402  | 1.647520  | -0.037010 |
| C  | -1.748420 | 1.428476  | 1.266293  |
| C  | -2.105198 | 1.172963  | 2.625343  |
| C  | -3.474337 | 1.155321  | 2.955113  |
| H  | -3.756921 | 0.970645  | 4.004193  |
| C  | -4.473255 | 1.355468  | 1.996086  |
| H  | -5.534215 | 1.329587  | 2.286245  |
| C  | -4.108739 | 1.583541  | 0.663415  |
| H  | -4.891906 | 1.731323  | -0.095728 |
| C  | -2.760124 | 1.631682  | 0.275607  |
| C  | -1.126776 | 0.823554  | 3.752444  |
| H  | -1.681922 | 1.054161  | 4.688036  |
| C  | 0.191884  | 1.606212  | 3.827089  |
| H  | 0.029206  | 2.699536  | 3.768130  |
| H  | 0.893091  | 1.320004  | 3.020216  |
| H  | 0.689673  | 1.396099  | 4.795887  |
| C  | -0.847569 | -0.688964 | 3.765309  |
| H  | -1.776666 | -1.281766 | 3.871255  |
| H  | -0.154723 | -0.963761 | 4.586699  |
| H  | -0.369598 | -0.991902 | 2.806966  |
| C  | -2.402496 | 1.851105  | -1.191368 |
| H  | -1.321205 | 2.088113  | -1.238756 |
| C  | -3.165662 | 3.023666  | -1.826503 |
| H  | -3.047899 | 3.958169  | -1.242013 |
| H  | -4.251905 | 2.813162  | -1.907075 |
| H  | -2.793659 | 3.213906  | -2.853988 |
| C  | -2.604818 | 0.558733  | -1.999969 |
| H  | -2.012456 | -0.267770 | -1.561633 |
| H  | -2.282146 | 0.695994  | -3.052850 |
| H  | -3.670317 | 0.248947  | -2.004218 |
| C  | 2.123466  | -1.568933 | -0.735658 |
| C  | 1.617874  | -2.089617 | -1.966703 |
| C  | 1.994291  | -3.390219 | -2.342889 |
| H  | 1.628361  | -3.800445 | -3.295337 |
| C  | 2.808388  | -4.181839 | -1.521950 |
| H  | 3.091775  | -5.196808 | -1.838910 |
| C  | 3.229019  | -3.688595 | -0.280291 |
| H  | 3.832506  | -4.328419 | 0.381788  |
| C  | 2.892265  | -2.391274 | 0.140231  |

|   |           |           |           |
|---|-----------|-----------|-----------|
| C | 0.657068  | -1.268041 | -2.818263 |
| H | 0.092935  | -0.642709 | -2.091233 |
| C | -0.362655 | -2.126968 | -3.576716 |
| H | -1.146473 | -1.482309 | -4.022682 |
| H | -0.862242 | -2.854630 | -2.907098 |
| H | 0.106172  | -2.692611 | -4.408749 |
| C | 1.374119  | -0.307610 | -3.780708 |
| H | 0.636691  | 0.275806  | -4.370053 |
| H | 2.016672  | -0.864976 | -4.494171 |
| H | 2.012892  | 0.413977  | -3.238612 |
| C | 3.290319  | -1.904612 | 1.528343  |
| H | 3.128187  | -0.807713 | 1.551647  |
| C | 2.357880  | -2.521707 | 2.586419  |
| H | 1.299850  | -2.284665 | 2.360156  |
| H | 2.587020  | -2.130867 | 3.599484  |
| H | 2.457676  | -3.626537 | 2.609205  |
| C | 4.765307  | -2.165733 | 1.867493  |
| H | 5.444264  | -1.737844 | 1.102641  |
| H | 4.985952  | -3.250399 | 1.942754  |
| H | 5.023658  | -1.711104 | 2.845964  |

## Conformation 25.

Multiplicity: 4

Charge: 0

E(B97-3c) = -3093.968834915629 Hartree

E(M06/def2-TZVP) = -3093.635385306203 Hartree

E(PBE - D3(BJ)/def2-TZVP) = -3092.609478592261 Hartree

E(PBE0 - D3(BJ)/def2-TZVP) = -3092.837790189364 Hartree

E(PBEh-3c) = -3089.873043529812 Hartree

E(PM6) = 10.10311 Kcal/mol

E(PM7) = 10.92971 Kcal/mol

E( $\omega$ B97X-V/def2-TZVP) = -3095.697755080522 Hartree

E(GFN1-xTB) = -132.181804772279 Hartree

E(GFN2-xTB) = -130.929993570523 Hartree

E(GFN-FF) = -18.187415100389 Hartree

## Coordinates:

|    |           |           |           |
|----|-----------|-----------|-----------|
| Co | 0.397977  | 0.403911  | 0.146975  |
| C  | 2.127776  | 1.149407  | 0.830571  |
| H  | 2.989673  | 0.690199  | 0.293184  |
| H  | 2.048021  | 2.192384  | 0.442535  |
| C  | 2.413162  | 1.164822  | 2.333128  |
| H  | 3.268061  | 1.851719  | 2.553395  |
| H  | 1.550685  | 1.605621  | 2.883575  |
| H  | 2.744510  | -0.212871 | 2.913373  |
| C  | 3.608383  | -0.629232 | 2.349145  |
| H  | 1.902241  | -0.904498 | 2.709589  |
| C  | 3.061368  | -0.238823 | 4.412973  |
| H  | 3.450373  | -1.246535 | 4.680996  |
| H  | 3.888765  | 0.474004  | 4.635760  |
| C  | 1.867030  | 0.074355  | 5.321996  |
| H  | 1.047013  | -0.639740 | 5.084763  |
| H  | 1.466875  | 1.083833  | 5.082610  |
| C  | 2.200839  | 0.000395  | 6.812207  |
| H  | 2.570062  | -1.008909 | 7.092031  |
| H  | 1.318778  | 0.221542  | 7.447276  |
| H  | 2.997068  | 0.725206  | 7.083524  |
| N  | -0.429092 | 1.235369  | -1.408570 |
| N  | -0.329978 | -1.389058 | -0.045726 |
| C  | -2.149271 | -2.161402 | -3.335604 |
| C  | -1.329712 | 0.601010  | -2.173507 |
| C  | -1.665106 | -0.758158 | -1.941728 |
| H  | -2.142195 | -1.421913 | -2.629332 |
| C  | -1.254591 | -1.700684 | -0.964956 |
| C  | -1.994775 | -3.079591 | -1.069076 |
| C  | -1.885872 | 2.755004  | -3.604036 |
| H  | -2.584119 | 3.088794  | -4.398719 |
| H  | -0.860666 | 2.957104  | -3.955443 |
| H  | -2.060737 | 3.388669  | -2.716618 |
| C  | -1.862271 | 0.497313  | -4.650358 |
| H  | -2.441674 | 0.947837  | -5.482639 |
| H  | -2.139366 | -0.572433 | -4.586854 |
| H  | -0.788120 | 0.551441  | -4.916547 |
| C  | -3.654732 | 1.141728  | -2.984043 |
| H  | -4.264247 | 1.620168  | -3.778059 |
| H  | -3.877630 | 1.654662  | -2.026514 |
| H  | -3.990381 | 0.092166  | -2.886857 |
| C  | -1.623774 | -4.140310 | -0.015346 |
| H  | -2.211208 | -5.056444 | -0.229859 |
| H  | -1.868477 | -3.821475 | 1.013646  |
| H  | -0.556131 | -4.417386 | -0.033095 |
| C  | -1.704864 | -3.691615 | -2.460914 |
| H  | -2.049705 | -3.045456 | -3.290415 |
| H  | -2.218450 | -4.670418 | -2.557097 |
| H  | -0.618626 | -3.861999 | -2.600427 |
| C  | -3.517197 | -2.832239 | -0.920852 |
| H  | -3.925321 | -2.175844 | -1.712655 |
| H  | -3.748700 | -2.365653 | 0.058292  |
| H  | -4.057957 | -3.799638 | -0.971390 |
| C  | 0.092433  | 2.546631  | -1.540445 |
| C  | -0.334533 | 3.554041  | -0.626627 |

|   |           |           |           |   |           |           |           |
|---|-----------|-----------|-----------|---|-----------|-----------|-----------|
| C | 0.231413  | 4.836979  | -0.721802 | H | -6.842230 | 0.373109  | 2.318598  |
| H | -0.108255 | 5.626943  | -0.034136 | H | -6.806971 | -0.206196 | 0.630073  |
| C | 1.222785  | 5.126095  | -1.667695 | N | 1.293255  | -1.394358 | -0.372616 |
| H | 1.652694  | 6.137070  | -1.729532 | N | 0.333723  | 1.395484  | 0.064407  |
| C | 1.682018  | 4.110069  | -2.515735 | C | 3.755927  | -1.683452 | 0.311509  |
| H | 2.486960  | 4.327678  | -3.234926 | C | 2.465901  | -0.854704 | -0.022513 |
| C | 1.144267  | 2.812669  | -2.466378 | C | 2.589032  | 0.288139  | 0.228313  |
| C | -1.377302 | 3.255957  | 0.445598  | H | 3.604847  | 0.837737  | 0.471767  |
| H | -1.523055 | 2.153339  | 0.447358  | C | 1.652654  | 1.596104  | 0.286956  |
| C | -2.736928 | 3.901197  | 0.130098  | C | 2.238703  | 3.006668  | 0.657421  |
| H | -3.136744 | 3.560724  | -0.845364 | C | 3.819515  | -3.111686 | -0.265701 |
| H | -2.650883 | 5.007126  | 0.088959  | H | 4.784359  | -3.565202 | 0.039939  |
| H | -3.484366 | 3.648754  | 0.910495  | H | 3.775158  | -3.125463 | -1.368702 |
| C | -0.886775 | 3.659429  | 1.845321  | H | 3.013814  | -3.765428 | 0.104876  |
| H | 0.082434  | 3.179141  | 2.086004  | C | 5.044732  | -0.962410 | -0.154204 |
| H | -1.621935 | 3.360114  | 2.619974  | H | 5.916263  | -1.621788 | 0.031629  |
| H | -0.749270 | 4.756818  | 1.930398  | H | 5.241370  | -0.016255 | 0.385050  |
| C | 1.729177  | 1.718337  | -3.353890 | H | 5.019208  | -0.736456 | -1.238284 |
| H | 1.089595  | 0.819584  | -3.241024 | C | 3.786759  | -1.780368 | 1.858375  |
| C | 3.142660  | 1.338768  | -2.874519 | H | 4.679693  | -2.364219 | 2.183221  |
| H | 3.140247  | 1.050070  | -1.806902 | H | 2.888074  | -2.313588 | 2.238976  |
| H | 3.842524  | 2.192485  | -2.989191 | H | 3.823215  | -0.789599 | 2.331728  |
| H | 3.543130  | 0.488362  | -3.463974 | C | 3.784158  | 3.035185  | 0.605851  |
| C | 1.752862  | 2.098470  | -4.843834 | H | 4.122057  | 4.073218  | 0.796358  |
| H | 0.748923  | 2.378967  | -5.219486 | H | 4.176309  | 4.728964  | -0.383942 |
| H | 2.118924  | 1.248099  | -5.454895 | H | 4.251447  | 2.398154  | 1.382488  |
| H | 2.431887  | 2.955104  | -5.034421 | C | 1.837580  | 3.414346  | 2.094632  |
| C | 0.179545  | -2.174517 | 1.016564  | H | 0.751312  | 3.588599  | 2.195601  |
| C | 1.395311  | -2.905923 | 0.884500  | H | 2.354386  | 4.358387  | 2.364683  |
| C | 1.864607  | -3.605042 | 2.016831  | H | 2.140874  | 2.641712  | 2.829426  |
| H | 2.805339  | -4.172019 | 1.926578  | C | 1.759095  | 4.088410  | -0.332060 |
| C | 1.191079  | -3.584910 | 3.240790  | H | 0.677242  | 4.283687  | -0.246316 |
| H | 1.589994  | -4.139101 | 4.103328  | H | 1.984480  | 3.804061  | -1.379089 |
| C | 0.018020  | -2.826590 | 3.367345  | H | 2.284731  | 5.041226  | -0.118398 |
| H | -0.502935 | -2.791029 | 4.335270  | C | 1.050665  | -2.666372 | -0.950401 |
| C | -0.495578 | -2.109523 | 2.277919  | C | 1.150206  | -2.811524 | -2.367569 |
| C | 2.253863  | -3.038034 | -0.380666 | C | 0.812582  | -4.059597 | -2.925357 |
| H | 3.297162  | -3.022849 | 0.006523  | H | 0.893380  | -4.183226 | -4.017456 |
| C | 2.176347  | -1.918651 | -1.425954 | C | 0.357821  | -5.126759 | -2.141681 |
| H | 3.021865  | -2.019698 | -2.137112 | C | 0.095201  | -6.086948 | -2.610283 |
| H | 2.252390  | -0.921974 | -0.950834 | C | 0.211058  | -4.948075 | -0.761493 |
| H | 1.239755  | -1.944890 | -2.015329 | H | -0.173925 | -5.774844 | -0.144297 |
| C | 2.067459  | -4.414279 | -1.050644 | C | 0.541066  | -3.728501 | -0.146634 |
| H | 2.820638  | -4.559322 | -1.852314 | C | 1.590007  | -1.715639 | -3.346954 |
| H | 1.066342  | -4.500769 | -1.518040 | H | 1.211095  | -2.072541 | -4.329178 |
| H | 2.173497  | -5.245063 | -0.324933 | C | 3.118356  | -1.613354 | -3.493027 |
| C | -1.729669 | -1.227056 | 2.426485  | H | 3.579846  | -2.602106 | -3.688151 |
| H | -2.208786 | -1.162341 | 1.428490  | H | 3.580392  | -1.187639 | -2.581620 |
| C | -2.776409 | -1.778503 | 3.401779  | H | 3.378383  | -0.942174 | -4.337550 |
| H | -3.068663 | -2.815292 | 3.138765  | C | 0.981769  | -0.317795 | -3.144150 |
| H | -3.689623 | -1.149840 | 3.382899  | H | -0.111264 | -0.366567 | -2.978528 |
| H | -2.409819 | -1.785122 | 4.448901  | H | 1.148234  | 0.293370  | -4.055424 |
| C | -1.315204 | 0.201286  | 2.819108  | H | 1.442725  | 0.230185  | -2.299231 |
| H | -0.542217 | 0.615599  | 2.125957  | C | 0.331449  | -3.563586 | 1.355093  |
| H | -0.854378 | 0.222178  | 3.827333  | H | 0.712135  | -2.556154 | 1.625621  |
| H | -2.178936 | 0.896108  | 2.806726  | C | 1.114576  | -4.602930 | 2.176043  |
|   |           |           |           | H | 2.196357  | -4.590451 | 1.938364  |
|   |           |           |           | H | 0.742599  | -5.630533 | 1.984493  |
|   |           |           |           | H | 1.002054  | -4.407370 | 3.262270  |
|   |           |           |           | C | -1.164267 | -3.612816 | 1.713868  |
|   |           |           |           | H | -1.738857 | -2.843770 | 1.163818  |
|   |           |           |           | H | -1.316003 | -3.445617 | 2.800183  |
|   |           |           |           | H | -1.601748 | -4.600270 | 1.460248  |
|   |           |           |           | C | -0.719652 | 2.283687  | 0.411044  |
|   |           |           |           | C | -1.216277 | 2.252976  | 1.751042  |
|   |           |           |           | C | -2.276292 | 3.105746  | 2.099515  |
|   |           |           |           | H | -2.654993 | 3.104715  | 3.132015  |
|   |           |           |           | C | -2.868115 | 3.949086  | 1.148758  |
|   |           |           |           | H | -3.697252 | 4.611685  | 1.438838  |
|   |           |           |           | C | -2.420175 | 3.921615  | -0.177043 |
|   |           |           |           | H | -2.912105 | 4.558956  | -0.927204 |
|   |           |           |           | C | -1.356229 | 3.092228  | -0.575671 |
|   |           |           |           | C | -0.657370 | 1.232658  | 2.737163  |
|   |           |           |           | H | 0.407718  | 1.067579  | 2.479451  |
|   |           |           |           | H | -1.376325 | -0.115193 | 2.553779  |
|   |           |           |           | H | -0.865077 | -0.931740 | 3.100597  |
|   |           |           |           | H | -1.446518 | -0.414765 | 1.475437  |
|   |           |           |           | H | -2.428390 | -0.058731 | 2.898776  |
|   |           |           |           | C | -0.715153 | 1.673169  | 4.203760  |
|   |           |           |           | H | -0.214491 | 0.924285  | 4.850115  |
|   |           |           |           | H | -1.759035 | 1.767780  | 4.567334  |
|   |           |           |           | H | -0.211752 | 2.648733  | 4.356535  |
|   |           |           |           | C | -0.937985 | 3.022015  | -2.039519 |
|   |           |           |           | H | 0.062663  | 2.544491  | -2.065609 |
|   |           |           |           | C | -1.899625 | 2.102180  | -2.810397 |
|   |           |           |           | H | -1.957970 | 1.109100  | -2.327533 |
|   |           |           |           | H | -1.561198 | 1.962574  | -3.857835 |
|   |           |           |           | H | -2.924195 | 2.528599  | -2.831807 |
|   |           |           |           | C | -0.841903 | 4.394001  | -2.722421 |
|   |           |           |           | H | -0.178133 | 5.090301  | -2.173641 |
|   |           |           |           | H | -1.837697 | 4.875473  | -2.811093 |

Conformation 28.  
Multiplicity: 4  
Charge: 0  
E(B97-3c) = -3093.960874786102 Hartree  
E(M06/def2-TZVP) = -3093.629286916373 Hartree  
E(PBE - D3(BJ)/def2-TZVP) = -3092.602374126739 Hartree  
E(PBE0 - D3(BJ)/def2-TZVP) = -3092.831855513065 Hartree  
E(PBEh-3c) = -3089.864124178142 Hartree  
E(PM6) = 19.93019 Kcal/mol  
E(PM7) = 17.37411 Kcal/mol  
E( $\omega$ B97X-V/def2-TZVP) = -3095.687345127710 Hartree  
E(GFN1-xTB) = -132.170290432317 Hartree  
E(GFN2-xTB) = -130.917971488172 Hartree  
E(GFN-FF) = -18.174791027163 Hartree

Coordinates:

|    |           |           |           |   |           |           |           |
|----|-----------|-----------|-----------|---|-----------|-----------|-----------|
| Co | -0.403057 | -0.381328 | -0.327386 | H | 0.407718  | 1.067579  | 2.479451  |
| C  | -1.941914 | -1.283037 | -1.266799 | C | -1.376325 | -0.115193 | 2.553779  |
| H  | -1.975903 | -1.001053 | -2.344114 | H | -0.865077 | -0.931740 | 3.100597  |
| H  | -1.442320 | -2.280742 | -1.255541 | H | -1.446518 | -0.414765 | 1.475437  |
| C  | -3.375433 | -1.462260 | -0.753561 | H | -2.428390 | -0.058731 | 2.898776  |
| H  | -3.802132 | -2.373583 | -1.236112 | C | -0.715153 | 1.673169  | 4.203760  |
| H  | -3.379966 | -1.702778 | 0.335028  | H | -0.214491 | 0.924285  | 4.850115  |
| C  | -4.341802 | -0.296772 | -1.018256 | H | -1.759035 | 1.767780  | 4.567334  |
| H  | -5.386417 | -0.678370 | -1.024029 | H | -0.211752 | 2.648733  | 4.356535  |
| H  | -4.163685 | 0.082430  | -2.047657 | C | -0.937985 | 3.022015  | -2.039519 |
| C  | -4.227313 | 0.858890  | -0.015834 | H | 0.062663  | 2.544491  | -2.065609 |
| H  | -3.152556 | 1.088937  | 0.133748  | C | -1.899625 | 2.102180  | -2.810397 |
| H  | -4.669184 | 1.783334  | -0.446966 | H | -1.957970 | 1.109100  | -2.327533 |
| C  | -4.883677 | 0.588248  | 1.346066  | H | -1.561198 | 1.962574  | -3.857835 |
| H  | -4.541232 | 1.363002  | 2.064724  | H | -2.924195 | 2.528599  | -2.831807 |
| H  | -4.512094 | -0.380310 | 1.749998  | C | -0.841903 | 4.394001  | -2.722421 |
| C  | -6.413707 | 0.572920  | 1.315295  | H | -0.178133 | 5.090301  | -2.173641 |
| H  | -6.815639 | 1.548156  | 0.967957  | H | -1.837697 | 4.875473  | -2.811093 |

H -0.445012 4.282694 -3.752013

Conformation 31.  
 Multiplicity: 4  
 Charge: 0  
 E(B97-3c) = -3093.965455867829 Hartree  
 E(M06/def2-TZVP) = -3093.629400858030 Hartree  
 E(PBE - D3(BJ)/def2-TZVP) = -3092.606612819721 Hartree  
 E(PBE0 - D3(BJ)/def2-TZVP) = -3092.833781489612 Hartree  
 E(PBEh-3c) = -3089.869251266124 Hartree  
 E(PM6) = 11.83661 Kcal/mol  
 E(PM7) = 14.50920 Kcal/mol  
 E( $\omega$ B97X-V/def2-TZVP) = -3095.693471187178 Hartree  
 E(GFN1-xTB) = -132.174847326341 Hartree  
 E(GFN2-xTB) = -130.923031769479 Hartree  
 E(GFN-FF) = -18.183856452005 Hartree

Coordinates:

|    |           |           |           |
|----|-----------|-----------|-----------|
| Co | -0.161102 | -0.299109 | 0.415017  |
| C  | 0.126946  | -0.083736 | 2.369161  |
| H  | -0.309662 | 0.903180  | 2.639664  |
| H  | -0.533083 | -0.851001 | 2.841143  |
| C  | 1.558166  | -0.195536 | 2.890589  |
| H  | 2.218256  | 0.526285  | 2.356342  |
| H  | 1.600369  | 0.107542  | 3.964374  |
| C  | 2.147213  | -1.601879 | 2.745313  |
| H  | 1.995909  | -1.926026 | 1.692476  |
| H  | 1.552215  | -2.314576 | 3.361404  |
| C  | 3.634325  | -1.728553 | 3.093492  |
| H  | 3.980955  | -2.758132 | 2.847632  |
| H  | 4.216469  | -1.047255 | 2.432343  |
| C  | 3.986696  | -1.431493 | 4.555311  |
| H  | 3.381092  | -2.090396 | 5.217546  |
| H  | 3.681686  | -0.392818 | 4.806999  |
| C  | 5.473618  | -1.612396 | 4.863119  |
| H  | 5.805765  | -2.651600 | 4.655473  |
| H  | 5.707390  | -1.392489 | 5.924578  |
| H  | 6.096754  | -0.939345 | 4.237137  |
| N  | -1.973881 | -0.325158 | -0.260641 |
| N  | 0.677060  | 0.731363  | -0.998164 |
| C  | -3.726689 | 0.023674  | -2.123729 |
| C  | -2.320330 | 0.194403  | -1.447637 |
| C  | -1.374568 | 0.888118  | -2.244107 |
| H  | -1.784666 | 1.261664  | -3.183351 |
| C  | 0.007659  | 1.158780  | -2.083118 |
| C  | 0.636220  | 1.957332  | -3.281392 |
| C  | -3.558974 | -1.019271 | -3.255700 |
| H  | -4.521478 | -1.161817 | -3.789818 |
| H  | -3.249833 | -2.001558 | -2.846627 |
| H  | -2.795685 | -0.703867 | -3.993610 |
| C  | -4.874961 | -0.453040 | -1.210872 |
| H  | -5.803835 | -0.482681 | -1.816457 |
| H  | -5.051626 | 0.236150  | -0.364696 |
| H  | -4.715313 | -1.464489 | -0.799463 |
| C  | -4.199228 | 1.366398  | -2.736117 |
| H  | -5.220787 | 1.242023  | -3.148860 |
| H  | -3.558875 | 1.724443  | -3.564307 |
| H  | -4.238922 | 2.165834  | -1.969183 |
| C  | 0.312335  | 1.228460  | -4.612485 |
| H  | 0.781155  | 1.778123  | -5.453970 |
| H  | -0.772162 | 1.167302  | -4.821625 |
| H  | 0.716192  | 0.196988  | -4.616988 |
| C  | 2.167432  | 2.129933  | -3.250794 |
| H  | 2.521778  | 2.744930  | -2.407726 |
| H  | 2.476561  | 2.636603  | -4.187708 |
| H  | 2.700592  | 1.163757  | -3.201909 |
| C  | -0.009919 | 3.363567  | -3.324215 |
| H  | 0.188706  | 3.930390  | -2.394742 |
| H  | -1.107776 | 3.307756  | -3.455773 |
| H  | 0.408661  | 3.944986  | -4.171661 |
| C  | -2.774219 | -1.078769 | 0.636160  |
| C  | -3.533878 | -0.465228 | 1.675559  |
| C  | -4.304724 | -1.313819 | 2.499042  |
| H  | -4.941228 | -0.856134 | 3.272395  |
| C  | -4.298154 | -2.704229 | 2.366220  |
| H  | -4.917920 | -3.327344 | 3.028181  |
| C  | -3.485378 | -3.295704 | 1.390267  |
| C  | -3.453895 | -4.391647 | 1.298038  |
| C  | -2.721155 | -2.505590 | 0.520653  |
| C  | -3.644894 | 1.036488  | 1.997301  |
| H  | -4.738481 | 1.253726  | 1.964332  |
| C  | -2.972167 | 2.055234  | 1.067370  |
| H  | -3.343461 | 2.007073  | 0.028198  |
| H  | -1.873593 | 1.924256  | 1.031563  |
| H  | -3.177789 | 3.076321  | 1.448420  |
| C  | -3.187519 | 1.309066  | 3.447692  |
| H  | -3.710762 | 0.670899  | 4.185076  |
| H  | -3.379531 | 2.367246  | 3.718968  |
| H  | -2.101544 | 1.118812  | 3.553929  |
| C  | -1.791844 | -3.157902 | -0.497084 |
| H  | -1.584703 | -2.406034 | -1.285065 |

|   |           |           |           |
|---|-----------|-----------|-----------|
| C | -2.393240 | -4.390464 | -1.184709 |
| H | -3.380042 | -4.162542 | -1.635915 |
| H | -2.535031 | -5.234453 | -0.478612 |
| H | -1.721724 | -4.751318 | -1.990289 |
| C | -0.449507 | -3.499209 | 0.173942  |
| H | -0.007063 | -2.605849 | 0.676277  |
| H | 0.291753  | -3.879041 | -0.558619 |
| H | -0.581702 | -4.262188 | 0.968840  |
| C | 2.019513  | 0.964735  | -0.608907 |
| C | 2.949872  | -0.120582 | -0.672892 |
| C | 4.262732  | 0.091331  | -0.220276 |
| H | 4.992592  | -0.728093 | -0.277413 |
| C | 4.658349  | 1.322613  | 0.319821  |
| H | 5.690984  | 1.465656  | 0.671586  |
| C | 3.723187  | 2.357200  | 0.434846  |
| H | 4.026476  | 3.312191  | 0.890886  |
| C | 2.399476  | 2.206004  | -0.014649 |
| C | 2.500897  | -1.488636 | -1.180569 |
| H | 1.492075  | -1.646965 | -0.725369 |
| C | 3.395361  | -2.647238 | -0.727217 |
| H | 2.921002  | -3.616235 | -0.982620 |
| H | 3.579991  | -2.632767 | 0.363890  |
| H | 4.379611  | -2.624522 | -1.239663 |
| C | 2.299540  | -1.544886 | -2.703281 |
| H | 1.943944  | -2.550027 | -3.010430 |
| H | 3.253195  | -1.345517 | -3.234869 |
| H | 1.551529  | -0.807612 | -3.042806 |
| C | 1.407463  | 3.348526  | 0.179747  |
| H | 0.485409  | 3.088986  | -0.378543 |
| C | 1.015455  | 3.489552  | 1.661542  |
| H | 0.598270  | 2.545266  | 2.055772  |
| H | 0.254529  | 4.286792  | 1.792724  |
| H | 1.898663  | 3.755437  | 2.281697  |
| C | 1.930174  | 4.691203  | -0.360153 |
| H | 2.253928  | 4.621105  | -1.417267 |
| H | 2.795655  | 5.055612  | 0.230356  |
| H | 1.140505  | 5.467452  | -0.295744 |

Conformation 6.

Multiplicity: 4  
 Charge: 0  
 E(B97-3c) = -3093.971023226195 Hartree  
 E(M06/def2-TZVP) = -3093.637498203542 Hartree  
 E(PBE - D3(BJ)/def2-TZVP) = -3092.610163129074 Hartree  
 E(PBE0 - D3(BJ)/def2-TZVP) = -3092.835533710656 Hartree  
 E(PBEh-3c) = -3089.876603004644 Hartree  
 E(PM6) = 8.97611 Kcal/mol  
 E(PM7) = 11.82756 Kcal/mol  
 E( $\omega$ B97X-V/def2-TZVP) = -3095.698526933079 Hartree  
 E(GFN1-xTB) = -132.181100983226 Hartree  
 E(GFN2-xTB) = -130.929081977177 Hartree  
 E(GFN-FF) = -18.190268496539 Hartree

Coordinates:

|    |           |           |           |
|----|-----------|-----------|-----------|
| Co | -0.408296 | -0.002955 | -0.174162 |
| C  | -2.271400 | 0.723510  | -0.205758 |
| H  | -2.314709 | 1.309244  | -1.153393 |
| H  | -2.917590 | -0.171065 | -0.369674 |
| C  | -2.766548 | 1.562341  | 0.972756  |
| H  | -2.836742 | 0.939160  | 1.891338  |
| H  | -1.996150 | 2.323043  | 1.211898  |
| C  | -4.099797 | 2.321318  | 0.754672  |
| H  | -4.136470 | -2.660848 | -0.305674 |
| H  | -4.072453 | 3.253720  | 1.361314  |
| C  | -5.415554 | 1.604538  | 1.098311  |
| H  | -5.449367 | 1.413911  | 2.195589  |
| H  | -6.239545 | 2.324296  | 0.901223  |
| C  | -5.717056 | 0.285771  | 0.359152  |
| H  | -5.289507 | 0.332351  | -0.666581 |
| H  | -6.815497 | 0.188782  | 0.219177  |
| C  | -5.208890 | -0.962630 | 1.083976  |
| H  | -5.716127 | -1.084334 | 2.064379  |
| H  | -4.122784 | -0.907156 | 1.288765  |
| H  | -5.390970 | -1.885748 | 0.495996  |
| C  | 0.748911  | -0.619021 | 1.238127  |
| N  | 0.938765  | 0.185449  | -1.534839 |
| C  | 2.941057  | -1.581122 | 2.182448  |
| C  | 2.046916  | -0.919307 | 1.082720  |
| C  | 2.688214  | -0.722291 | -0.164632 |
| H  | 3.738946  | -1.022114 | -0.179015 |
| C  | 2.218802  | -2.186998 | -1.393783 |
| C  | 3.312190  | -0.091690 | -2.507608 |
| C  | 2.312816  | -1.690640 | 3.583697  |
| H  | 3.032849  | -2.213165 | 4.245946  |
| H  | 1.372217  | -2.267718 | 3.593611  |
| H  | 2.104756  | -0.703445 | 4.033181  |
| C  | 3.258232  | -3.019143 | 1.702133  |
| H  | 3.896275  | -3.537373 | 2.447824  |
| H  | 3.789152  | -3.026261 | 0.730542  |
| H  | 2.326758  | -3.608646 | 1.581233  |
| C  | 4.256090  | -0.783055 | 2.347222  |

|   |           |           |           |   |           |           |           |
|---|-----------|-----------|-----------|---|-----------|-----------|-----------|
| H | 4.882318  | -1.255685 | 3.131259  | C | -0.450716 | -2.101897 | 1.384869  |
| H | 4.048451  | 0.259665  | 2.662638  | H | -1.509704 | -2.388326 | 1.191987  |
| H | 4.859424  | -0.741753 | 1.420456  | H | 0.172336  | -2.897687 | 0.910662  |
| C | 2.839242  | 0.413801  | -3.882969 | C | -0.220410 | -2.085951 | 2.898597  |
| H | 3.718016  | 0.442802  | -4.559169 | H | -0.313829 | -3.127619 | 3.295970  |
| H | 2.408629  | 1.429478  | -3.850867 | H | 0.827038  | -1.788610 | 3.135318  |
| H | 2.086140  | -0.250819 | -4.341817 | C | -1.197806 | -1.195625 | 3.672960  |
| C | 3.918489  | -1.498001 | -2.740955 | H | -2.223964 | -1.384361 | 3.287067  |
| H | 4.416649  | -1.907317 | -1.841500 | H | -0.997121 | -0.130003 | 3.438874  |
| H | 4.676103  | -1.448288 | -3.549813 | C | -1.208776 | -1.416127 | 5.192366  |
| H | 3.135438  | -2.219015 | -3.051637 | H | -2.017544 | -0.794177 | 5.637999  |
| C | 4.412089  | 0.876502  | -2.008320 | H | -1.491444 | -2.473291 | 5.395931  |
| H | 4.880579  | 0.528902  | -1.067744 | C | 0.106189  | -1.108905 | 5.925126  |
| H | 3.992564  | 1.885372  | -1.821525 | H | 0.926281  | -1.724731 | 5.494327  |
| H | 5.209958  | 0.973865  | -2.773506 | H | 0.012073  | -1.441184 | 6.981949  |
| C | -0.075079 | -0.587991 | 2.388896  | C | 0.504708  | 0.575534  | 5.896556  |
| C | -0.039885 | 0.547963  | 3.254874  | H | 0.643301  | 0.732138  | 4.859398  |
| C | -1.010074 | 0.641557  | 4.264655  | H | 1.450111  | 0.549194  | 6.447451  |
| H | -1.005989 | 1.511402  | 4.938026  | H | -0.281340 | 1.004028  | 6.355046  |
| C | -1.990438 | -0.349213 | 4.429391  | N | 0.781765  | -0.823773 | -1.558464 |
| H | -2.751249 | -0.245624 | 5.217489  | N | -0.765378 | 1.209513  | -0.008007 |
| C | -1.987498 | -1.477505 | 3.599372  | C | 1.552226  | 0.054057  | -3.835586 |
| H | -2.743054 | -2.264219 | 3.751464  | C | 0.768575  | 0.163409  | -2.481186 |
| C | -1.031806 | -1.628228 | 2.579165  | C | 0.098406  | 1.387258  | -2.246448 |
| C | 1.025659  | 1.623185  | 3.065738  | H | 0.154228  | 2.084550  | -3.079736 |
| H | 1.906674  | 1.123235  | 2.613182  | C | -0.606782 | 1.918131  | -1.132376 |
| C | 1.491426  | 2.258881  | 4.381756  | C | -1.139834 | 3.375204  | -1.370696 |
| H | 1.798844  | 1.492254  | 5.121877  | C | 1.470846  | 1.342232  | -4.684047 |
| H | 0.696862  | 2.877591  | 4.847486  | H | 2.067662  | 1.191356  | -5.605718 |
| H | 2.357022  | 2.927697  | 4.199675  | H | 1.890302  | 2.223269  | -4.159597 |
| C | 0.573219  | 2.692820  | 2.059942  | H | 0.435246  | 1.577625  | -5.000264 |
| H | 0.238929  | 2.222068  | 1.113484  | C | 3.047948  | -0.190608 | -3.544890 |
| H | 1.399013  | 3.395454  | 1.824554  | H | 3.622175  | -0.149203 | -4.493109 |
| H | -0.277874 | 3.280257  | 2.461091  | H | 3.222705  | -1.182965 | -3.094654 |
| C | -0.984274 | -2.902146 | 1.741090  | H | 3.456463  | 0.583409  | -2.864633 |
| H | -0.157019 | -2.778310 | 1.011132  | C | 1.012088  | -1.086801 | -4.720335 |
| C | -2.272571 | -3.130494 | 0.938534  | H | 1.534504  | -1.074302 | -5.699116 |
| H | -2.492816 | -2.261052 | 0.291136  | H | -0.071962 | -0.964308 | -4.913038 |
| H | -3.147336 | -3.283429 | 1.602961  | H | 1.181071  | -2.077970 | -4.266113 |
| H | -2.179006 | -4.026912 | 0.291841  | C | -1.871205 | -4.047673 | -0.193555 |
| C | -0.659020 | -4.131128 | 2.609452  | H | -2.211764 | 5.048695  | -0.528826 |
| H | 0.281180  | -3.996004 | 3.180008  | H | -1.219537 | 4.194214  | 0.685867  |
| H | -0.547886 | -5.036830 | 1.978155  | H | -2.760330 | 3.487966  | 0.141050  |
| H | -1.467153 | -4.331729 | 3.343041  | C | -2.126860 | 3.339316  | -2.563150 |
| C | 0.259547  | 0.704942  | -2.667705 | H | -1.652695 | 2.975177  | -3.494429 |
| C | 0.094532  | 2.113184  | -2.811550 | H | -2.521028 | 4.358137  | -2.757391 |
| C | -0.673072 | 2.590286  | -3.888235 | H | -2.988741 | 2.676954  | -2.345476 |
| H | -0.800794 | 3.676641  | -4.015316 | C | 0.059995  | 4.292631  | -1.719905 |
| C | -1.283300 | 1.713842  | -4.794325 | H | 0.580777  | 3.980302  | -2.640509 |
| H | -1.882160 | 2.108564  | -5.628855 | H | 0.799156  | 4.306517  | -0.893226 |
| C | -1.138160 | 0.330193  | -4.624248 | H | -0.296877 | 5.332081  | -1.871607 |
| H | -1.631530 | -0.356520 | -5.329317 | C | 1.318316  | -2.137691 | -1.678680 |
| C | -0.374979 | -0.199220 | -3.570885 | C | 0.525074  | -3.189972 | -2.238419 |
| C | 0.712498  | 3.094827  | -1.822567 | C | 1.056644  | -4.491466 | -2.273406 |
| H | 1.210676  | 2.491719  | -1.036228 | H | 0.453365  | -5.301238 | -2.711153 |
| C | -0.365766 | 3.951032  | -1.137012 | C | 2.323157  | -4.783253 | -1.754102 |
| H | 0.084932  | 4.592756  | -0.352822 | H | 2.719006  | -5.809045 | -1.797147 |
| H | -1.136676 | 3.316568  | -0.660219 | C | 3.068255  | -3.761545 | -1.156404 |
| H | -0.876120 | 4.617186  | -1.863128 | H | 4.049948  | -3.993630 | -0.715695 |
| C | 1.779405  | 3.987582  | -2.480276 | C | 2.587778  | -2.581302 | -1.095575 |
| H | 2.238545  | 4.664628  | -1.730621 | C | -0.909078 | -2.967813 | -2.716274 |
| H | 1.338498  | 4.621304  | -3.277621 | H | -1.065816 | -1.874130 | -2.811002 |
| H | 2.591672  | 3.391130  | -2.940859 | C | -1.899701 | -3.491643 | -1.660128 |
| C | -0.269540 | -1.707500 | -3.374329 | H | -1.716852 | -3.034353 | -0.672766 |
| H | 0.544213  | -1.889066 | -2.642953 | H | -1.799206 | -4.590638 | -1.542726 |
| C | -1.567208 | -2.253091 | -2.753210 | H | -2.945709 | -3.272885 | -1.958111 |
| H | -1.794418 | -1.733105 | -1.800500 | C | -1.220565 | -3.624141 | -4.072428 |
| H | -1.485707 | -3.338737 | -2.538928 | H | -0.502056 | -3.334820 | -4.862228 |
| H | -2.430812 | -2.096669 | -3.432237 | H | -2.236494 | -3.335017 | -4.410835 |
| C | 0.087773  | -2.462044 | -4.663761 | H | -1.210387 | -4.731111 | -3.997818 |
| H | 1.019204  | -2.073175 | -5.122820 | C | 3.397415  | -1.395989 | -0.332455 |
| H | -0.717391 | -2.385245 | -5.423297 | H | 2.946005  | -0.404846 | -0.548886 |
| H | 0.235760  | -3.540776 | -4.452285 | C | 4.879325  | -1.342870 | -0.737889 |

Conformation 9.

Multiplicity: 4

Charge: 0

E(B97-3c) = -3093.963856053141 Hartree

E(M06/def2-TZVP) = -3093.631833698390 Hartree

E(PBE - D3(BJ)/def2-TZVP) = -3092.605265298622 Hartree

E(PBE0 - D3(BJ)/def2-TZVP) = -3092.834249570261 Hartree

E(PBEh-3c) = -3089.869321068853 Hartree

E(PM6) = 14.47656 Kcal/mol

E(PM7) = 14.89500 Kcal/mol

E( $\omega$ B97X-V/def2-TZVP) = -3095.692909302862 Hartree

E(GFN1-xTB) = -132.173137986320 Hartree

E(GFN2-xTB) = -130.921770408595 Hartree

E(GFN-FF) = -18.182008739047 Hartree

Coordinates:

|    |          |           |          |   |           |           |          |
|----|----------|-----------|----------|---|-----------|-----------|----------|
| Co | 0.052541 | -0.541344 | 0.230928 | H | -4.245111 | -0.146675 | 1.316140 |
|----|----------|-----------|----------|---|-----------|-----------|----------|



|   |           |           |           |   |           |           |           |
|---|-----------|-----------|-----------|---|-----------|-----------|-----------|
| C | -3.201197 | -0.293608 | -0.531869 | H | 1.359017  | -5.569798 | -2.851144 |
| H | -4.038457 | -0.891797 | -0.946485 | H | 0.191083  | -4.713496 | -1.786074 |
| H | -2.418367 | -0.999909 | -0.199056 | H | 1.694041  | -5.404845 | -1.100432 |
| H | -2.781758 | 0.311655  | -1.358020 | C | 1.317436  | -2.883796 | -3.488030 |
| C | -4.791084 | 1.547869  | 0.129595  | H | 1.834000  | -1.958575 | -3.808641 |
| H | -5.598776 | 1.005662  | -0.403794 | H | 0.263667  | -2.630472 | -3.271811 |
| H | -4.358498 | 2.282554  | -0.578776 | H | 1.327154  | -3.587735 | -4.347281 |
| H | -5.252892 | 2.113821  | 0.966242  | C | -2.732690 | 3.476409  | 0.270000  |
| C | 0.924087  | 2.578175  | 1.819432  | H | -1.630877 | 3.475242  | 0.341960  |
| H | 0.974788  | 2.724518  | 0.721403  | H | -3.129857 | 4.091884  | 1.104076  |
| C | 1.487814  | 3.844461  | 2.473854  | H | -2.999534 | 3.993604  | -0.673920 |
| H | 0.857698  | 4.730617  | 2.256509  | C | -3.961591 | 1.237999  | 2.075318  |
| H | 2.509474  | 4.048877  | 2.094578  | H | -4.743898 | 0.451769  | 2.050513  |
| H | 1.565484  | 3.745147  | 3.576084  | H | -4.349919 | 2.087316  | 2.674609  |
| C | 1.799097  | 1.356831  | 2.144979  | H | -3.083121 | 0.801953  | 2.587053  |
| H | 1.343230  | 0.416823  | 1.753503  | C | -5.167617 | 1.970265  | -0.610149 |
| H | 1.895683  | 1.210620  | 3.240068  | H | -5.026216 | 2.307995  | -1.656844 |
| H | 2.814838  | 1.447579  | 1.710688  | H | -5.741391 | 2.758962  | -0.078403 |

## AJOMIX

Conformation 11.

Multiplicity: 4

Charge: 0

E(B97-3c) = -4478.406797519745 Hartree

E(M06/def2-TZVP) = -4478.394981553469 Hartree

E(PBE - D3(BJ)/def2-TZVP) = -4476.712739708432 Hartree

E(PBE0 - D3(BJ)/def2-TZVP) = -4477.086899115723 Hartree

E(PBEh-3c) = -4473.003954433887 Hartree

E(PM6) = -142.60181 Kcal/mol

E(PM7) = -204.38983 Kcal/mol

E( $\omega$ B97X-V/def2-TZVP) = -4480.434995379660 Hartree

E(GFN1-xTB) = -139.771656147191 Hartree

E(GFN2-xTB) = -136.960811665688 Hartree

E(GFN-FF) = -18.059600203140 Hartree

Coordinates:

|   |           |           |           |    |           |           |           |
|---|-----------|-----------|-----------|----|-----------|-----------|-----------|
| C | 0.943747  | 0.175276  | -0.817298 | H  | -1.077927 | -0.299813 | 5.526669  |
| C | 2.594591  | 1.031047  | -2.166228 | H  | -0.463819 | 2.342764  | 5.251843  |
| H | 3.115699  | 1.809692  | -2.728987 | H  | -0.014221 | 2.433280  | 1.540561  |
| C | 2.815587  | -0.311402 | -2.063730 | H  | -0.005860 | 3.126514  | 3.190290  |
| H | 3.592034  | -0.935453 | -2.511222 | H  | -1.540249 | 2.575917  | 2.467337  |
| C | 1.021096  | 2.674169  | -1.238478 | C  | -2.962656 | -2.116782 | 3.539309  |
| C | -0.021798 | 3.163833  | -2.068209 | H  | -2.988035 | -1.510090 | 4.465090  |
| C | -0.318405 | 4.536233  | -1.969508 | H  | -3.291363 | -3.145820 | 3.796710  |
| H | -1.121488 | 4.958629  | -2.587063 | H  | -3.705120 | -1.686868 | 2.837929  |
| C | 0.374118  | 5.373387  | -1.086604 | C  | -1.334707 | -3.493241 | 1.391832  |
| H | 0.111642  | 6.440470  | -1.027103 | H  | -2.123028 | -3.275594 | 0.646208  |
| C | 1.385670  | 4.857950  | -0.271086 | H  | -1.584527 | -4.464837 | 1.867508  |
| H | 1.915072  | 5.522189  | 0.426967  | H  | -0.376109 | -3.600207 | 0.848374  |
| C | 1.742036  | 3.497296  | -0.334774 | C  | -0.040746 | -2.874219 | 4.066040  |
| C | -0.803217 | 2.247123  | -3.008328 | H  | 0.975285  | -3.031175 | 3.649421  |
| H | -1.078792 | 1.357157  | -2.399013 | H  | -0.411467 | -3.853192 | 4.435937  |
| C | -2.113876 | 2.868423  | -3.502773 | H  | 0.057493  | -2.203470 | 4.943575  |
| H | -2.767996 | 3.182206  | -2.667436 | N  | 1.468016  | 1.310531  | -1.396567 |
| H | -2.676303 | 2.127836  | -4.103180 | N  | 1.808052  | -0.824228 | -1.249366 |
| H | -1.934834 | 3.747112  | -4.157147 | N  | -2.468070 | 0.515057  | -0.424473 |
| C | 0.026982  | 1.788456  | -4.223335 | N  | -0.676794 | -0.607594 | 2.170342  |
| H | 0.334453  | 2.657737  | -4.841954 | Si | -3.508164 | 1.738098  | 0.299226  |
| H | -0.581022 | 1.117753  | -4.864393 | Si | -3.174895 | -0.813254 | -1.325253 |
| H | 0.940151  | 1.232879  | -3.940546 | Si | -0.205973 | 0.634180  | 3.325519  |
| C | 2.902337  | 2.967650  | 0.506862  | Si | -1.233710 | -2.174440 | 2.749986  |
| H | 2.775809  | 1.867486  | 0.591926  | P  | 1.636939  | -2.525314 | -0.698943 |
| C | 4.254460  | 3.243352  | -0.181672 | Co | -0.745807 | 0.023505  | 0.343588  |
| H | 4.318654  | 2.787290  | -1.186841 |    |           |           |           |
| H | 5.089215  | 2.839140  | 0.426842  |    |           |           |           |
| H | 4.414056  | 4.335456  | -0.295974 |    |           |           |           |
| C | 2.932912  | 3.540644  | 1.932108  |    |           |           |           |
| H | 3.197074  | 4.618079  | 1.934126  |    |           |           |           |
| H | 3.702703  | 3.016978  | 2.533440  |    |           |           |           |
| H | 1.962317  | 3.423284  | 2.445660  |    |           |           |           |
| C | 3.104887  | -2.625191 | 0.525321  |    |           |           |           |
| C | 2.737363  | -1.575878 | 1.588576  |    |           |           |           |
| H | 1.666392  | -1.596454 | 1.873824  |    |           |           |           |
| H | 2.949094  | -0.551654 | 1.222519  |    |           |           |           |
| H | 3.349939  | -1.736979 | 2.500155  |    |           |           |           |
| C | 4.531219  | -2.333884 | 0.037795  |    |           |           |           |
| H | 5.203552  | -2.294915 | 0.922222  |    |           |           |           |
| H | 4.605588  | -1.346375 | -0.458650 |    |           |           |           |
| H | 4.932112  | -3.105193 | -0.642312 |    |           |           |           |
| C | 3.020922  | -4.037190 | 1.137210  |    |           |           |           |
| H | 3.717671  | -4.108811 | 1.999224  |    |           |           |           |
| H | 3.308540  | -4.826964 | 0.413911  |    |           |           |           |
| H | 2.001425  | -4.262236 | 1.512043  |    |           |           |           |
| C | 2.003317  | -3.557839 | -2.286237 |    |           |           |           |
| C | 3.464639  | -3.866442 | -2.639702 |    |           |           |           |
| H | 3.488049  | -4.470432 | -3.572660 |    |           |           |           |
| H | 3.971584  | -4.460650 | -1.855734 |    |           |           |           |
| H | 4.068478  | -2.957520 | -2.827779 |    |           |           |           |
| C | 1.268405  | -4.884208 | -1.981677 |    |           |           |           |

Conformation 14.

Multiplicity: 4

Charge: 0

E(B97-3c) = -4478.405838585287 Hartree

E(M06/def2-TZVP) = -4478.396031220862 Hartree

E(PBE - D3(BJ)/def2-TZVP) = -4476.710650425274 Hartree

E(PBE0 - D3(BJ)/def2-TZVP) = -4477.086317034547 Hartree

E(PBEh-3c) = -4473.006022444982 Hartree

E(PM6) = -138.89991 Kcal/mol

E(PM7) = -194.58364 Kcal/mol

E( $\omega$ B97X-V/def2-TZVP) = -4480.434159702331 Hartree

E(GFN1-xTB) = -139.767273729267 Hartree

E(GFN2-xTB) = -136.959005112215 Hartree

E(GFN-FF) = -18.067452078324 Hartree

Coordinates:

|   |          |           |           |  |  |  |  |
|---|----------|-----------|-----------|--|--|--|--|
| C | 1.087327 | 0.362499  | 0.462283  |  |  |  |  |
| C | 3.173120 | 0.871323  | 1.273038  |  |  |  |  |
| H | 4.249539 | 0.736986  | 1.410510  |  |  |  |  |
| C | 2.305829 | 1.793180  | 1.789036  |  |  |  |  |
| H | 2.484308 | 2.627119  | 2.471304  |  |  |  |  |
| C | 3.091062 | -0.887147 | -0.452860 |  |  |  |  |
| C | 3.060747 | -2.279277 | -0.200288 |  |  |  |  |
| C | 3.743181 | -3.117902 | -1.101165 |  |  |  |  |
| H | 3.726074 | -4.204437 | -0.939066 |  |  |  |  |

|           |           |           |           |                                                            |            |           |           |
|-----------|-----------|-----------|-----------|------------------------------------------------------------|------------|-----------|-----------|
| C         | 4.449163  | -2.594240 | -2.190222 | C                                                          | -1.780140  | -5.113677 | 0.937818  |
| H         | 4.978487  | -3.270569 | -2.878395 | H                                                          | -0.721614  | -5.394807 | 0.774011  |
| C         | 4.478302  | -1.213692 | -2.407334 | H                                                          | -2.406250  | -5.830687 | 0.364906  |
| H         | 5.025743  | -0.808966 | -3.271096 | H                                                          | -2.012468  | -5.250069 | 2.009760  |
| C         | 3.791961  | -0.329368 | -1.554249 | C                                                          | -4.014226  | -3.077253 | 0.593394  |
| C         | 2.383233  | -2.842513 | 1.036949  | H                                                          | -4.254072  | -3.167761 | 1.672791  |
| H         | 1.485292  | -2.222164 | 1.233310  | H                                                          | -4.632898  | -3.823264 | 0.051745  |
| C         | 1.886186  | -4.279503 | 0.861599  | H                                                          | -4.331867  | -2.068451 | 0.265075  |
| H         | 1.263353  | -4.382537 | -0.048473 | N                                                          | 2.429132   | 0.030140  | 0.448328  |
| H         | 1.259224  | -4.565138 | 1.728667  | N                                                          | 1.046708   | 1.481135  | 1.283346  |
| H         | 2.719289  | -5.010529 | 0.801120  | N                                                          | -1.572242  | -0.074906 | -1.782031 |
| C         | 3.345254  | -2.740481 | 2.236459  | N                                                          | -1.197651  | -2.056844 | 0.972337  |
| H         | 4.282068  | -3.298927 | 2.030765  | Si                                                         | -0.767433  | -0.361382 | -3.324986 |
| H         | 2.885398  | -3.171755 | 3.148457  | Si                                                         | -3.230163  | 0.523704  | -1.764293 |
| H         | 3.615392  | -1.690362 | 2.464607  | Si                                                         | -1.335502  | -1.761995 | 2.702408  |
| C         | 3.812526  | 1.166921  | -1.850168 | Si                                                         | -2.158923  | -3.367741 | 0.274024  |
| H         | 3.011480  | 1.638756  | -1.245219 | P                                                          | -0.487044  | 2.415471  | 1.357640  |
| C         | 5.152560  | 1.803888  | -1.438829 | Co                                                         | -0.611193  | -0.602940 | -0.184923 |
| H         | 5.375160  | 1.654909  | -0.364408 |                                                            |            |           |           |
| H         | 5.143135  | 2.895452  | -1.636487 | Conformation 17.                                           |            |           |           |
| H         | 5.989850  | 1.361856  | -2.017593 | Multiplicity: 4                                            |            |           |           |
| C         | 3.507251  | 1.470581  | -3.326515 | Charge: 0                                                  |            |           |           |
| H         | 4.345813  | 1.171641  | -3.988241 | E(B97-3c) = -4478.404657737991 Hartree                     |            |           |           |
| H         | 3.349739  | 2.558755  | -3.469557 | E(M06/def2-TZVP) = -4478.392774683970 Hartree              |            |           |           |
| H         | 2.597810  | 0.944811  | -3.670559 | E(PBE - D3(BJ)/def2-TZVP) = -4476.711087665895 Hartree     |            |           |           |
| C         | -0.081243 | 3.782873  | 0.074665  | E(PBE0 - D3(BJ)/def2-TZVP) = -4477.084918833831 Hartree    |            |           |           |
| C         | 1.212597  | 4.589319  | 0.255970  | E(PBEh-3c) = -4473.001951029328 Hartree                    |            |           |           |
| H         | 2.099980  | 3.930626  | 0.339896  | E(PM6) = -145.17434 Kcal/mol                               |            |           |           |
| H         | 1.193725  | 5.268867  | 1.125542  | E(PM7) = -217.64925 Kcal/mol                               |            |           |           |
| H         | 1.365890  | 5.217604  | -0.648061 | E( $\omega$ B97X-V/def2-TZVP) = -4480.431554094200 Hartree |            |           |           |
| C         | -1.308523 | 4.714011  | 0.048670  | E(GFN1-xTB) = -139.774184918721 Hartree                    |            |           |           |
| H         | -1.229690 | 5.400403  | -0.820891 | E(GFN2-xTB) = -136.959622895509 Hartree                    |            |           |           |
| H         | -1.382977 | 5.343661  | 0.957702  | E(GFN-FF) = -18.059908717412 Hartree                       |            |           |           |
| H         | -2.255088 | 4.146009  | -0.062909 |                                                            |            |           |           |
| C         | 0.011391  | 3.026261  | -1.261588 | Coordinates:                                               |            |           |           |
| H         | -0.005054 | 3.755119  | -2.099122 | C                                                          | -0.207602  | -0.900670 | -0.728243 |
| H         | -0.805386 | 2.294339  | -1.412934 | C                                                          | -1.153471  | -2.584555 | -1.969549 |
| H         | 0.957608  | 2.454872  | -1.335422 | H                                                          | -1.914534  | -3.050961 | -2.601454 |
| C         | -0.509066 | 3.171956  | 3.126313  | C                                                          | 0.023504   | -3.064460 | -1.471157 |
| C         | 0.333011  | 4.424980  | 3.407346  | H                                                          | 0.494433   | -4.041098 | -1.596098 |
| H         | 0.208562  | 4.704311  | 4.475885  | C                                                          | -2.323705  | -0.413657 | -2.022173 |
| H         | 0.008889  | 5.295260  | 2.805659  | C                                                          | -3.637134  | 0.066592  | -1.533217 |
| H         | 1.416429  | 4.272850  | 3.236500  | C                                                          | -4.659439  | -0.194362 | -2.078274 |
| C         | -2.002857 | 3.515176  | 3.336976  | H                                                          | -5.689362  | 0.074576  | -1.710410 |
| H         | -2.149096 | 3.890026  | 4.372344  | C                                                          | -4.383395  | 1.142748  | -3.065571 |
| H         | -2.649207 | 2.625588  | 3.203163  | H                                                          | -5.192835  | 1.771182  | -3.466530 |
| H         | -2.357935 | 4.303544  | 2.645047  | C                                                          | -3.078998  | 1.290633  | -3.555938 |
| C         | -0.125127 | 2.061789  | 4.118789  | H                                                          | -2.880922  | 2.027259  | -4.345880 |
| H         | 0.951062  | 1.807048  | 4.082820  | C                                                          | -2.020363  | 0.505262  | -3.065361 |
| H         | -0.697519 | 1.135146  | 3.941008  | C                                                          | -3.979101  | -1.682361 | -0.510368 |
| H         | -0.354203 | 2.407046  | 5.149473  | H                                                          | -3.028781  | -2.094646 | -0.121374 |
| C         | 0.747814  | -1.470760 | -3.084774 | H                                                          | -4.1750495 | -1.133817 | 0.698030  |
| H         | 1.497536  | -1.011705 | -2.414423 | H                                                          | -4.139825  | -0.393950 | 1.247135  |
| H         | 1.242828  | -1.645473 | -4.063008 | H                                                          | -5.003850  | -1.957032 | 1.396329  |
| H         | 0.477829  | -2.457858 | -2.663365 | H                                                          | -5.703513  | -0.650272 | 0.400840  |
| C         | -0.157964 | 1.238124  | -4.161400 | C                                                          | -4.752264  | -2.832477 | -1.183119 |
| -0.994505 | 1.932927  | -4.372206 | H         | -5.737052                                                  | -2.486882  | -1.560343 |           |
| H         | 0.324671  | 0.987142  | -5.129770 | H                                                          | -4.935613  | -3.653089 | -0.459916 |
| H         | 0.582510  | 1.780971  | -3.545936 | H                                                          | -4.199730  | -3.254961 | -2.046739 |
| C         | -1.868084 | -1.190371 | -4.640430 | C                                                          | -0.621956  | 0.597480  | -3.676267 |
| H         | -2.317918 | -2.136080 | -4.279670 | H                                                          | 0.098939   | 0.567677  | -2.830820 |
| H         | -1.246502 | -1.425031 | -5.530306 | C                                                          | -0.323546  | -0.612473 | -4.585575 |
| H         | -2.689280 | -0.524898 | -4.976426 | H                                                          | -0.414628  | -1.578377 | -4.055029 |
| C         | -3.450443 | 2.070514  | -2.858353 | H                                                          | 0.710234   | -0.545356 | -4.982122 |
| H         | -2.772551 | 2.895198  | -2.557945 | H                                                          | -1.019420  | -0.630827 | -5.449718 |
| H         | -4.494569 | 2.439586  | -2.772207 | C                                                          | -0.366936  | 1.888760  | -4.461788 |
| H         | -3.259425 | 1.847819  | -3.928041 | H                                                          | -0.975976  | 1.928646  | -5.388517 |
| C         | -3.779384 | 0.999856  | -0.019438 | H                                                          | 0.696232   | 1.936595  | -4.768923 |
| H         | -3.780854 | 0.118869  | 0.649463  | H                                                          | -0.582781  | 2.791937  | -3.862543 |
| H         | -4.810109 | 1.410045  | -0.050151 | C                                                          | 3.291293   | -1.655689 | -1.513934 |
| H         | -3.107357 | 1.756375  | 0.431363  | C                                                          | 2.989729   | -2.515423 | -2.748763 |
| C         | -4.494322 | -0.746180 | -2.405425 | H                                                          | 1.944969   | -2.381855 | -3.091775 |
| H         | -4.414465 | -0.895002 | -3.499638 | H                                                          | 3.172445   | -3.593496 | -2.588638 |
| H         | -5.522991 | -0.389054 | -2.186973 | C                                                          | 3.647349   | -2.188970 | -3.583328 |
| H         | -4.369526 | -1.733755 | -1.920849 | H                                                          | 4.762190   | -1.805844 | -1.083580 |
| C         | 0.329786  | -1.317765 | 3.502427  | H                                                          | 5.418540   | -1.412666 | -1.888518 |
| H         | 0.967533  | -2.222397 | 3.535375  | H                                                          | 5.050779   | -2.861008 | -0.909121 |
| H         | 0.167829  | -0.998071 | 4.552838  | H                                                          | 4.983256   | -1.225882 | -0.164246 |
| H         | 0.894455  | -0.520612 | 2.985810  | C                                                          | 3.018889   | -0.180434 | -1.861357 |
| C         | -1.896883 | -3.252335 | 3.749064  | H                                                          | 3.703088   | 0.144112  | -2.674057 |
| H         | -2.897223 | -3.639582 | 3.472429  | H                                                          | 3.148475   | 0.495496  | -0.994365 |
| H         | -1.950549 | -2.917407 | 4.806884  | H                                                          | 1.981142   | -0.036441 | -2.219941 |
| H         | -1.173971 | -4.091080 | 3.700553  | C                                                          | 2.487327   | -3.744619 | 0.696421  |
| C         | -2.609471 | -0.407641 | 3.086249  | C                                                          | 2.895046   | -4.847080 | -0.291676 |
| H         | -2.415207 | 0.512985  | 2.503427  | H                                                          | 3.032464   | -5.798087 | 0.267143  |
| H         | -2.617790 | -0.154759 | 4.167164  | H                                                          | 3.852776   | -4.628461 | -0.801433 |
| H         | -3.624751 | -0.762285 | 2.815460  | H                                                          | 2.131607   | -5.042335 | -1.069339 |
| C         | -1.886362 | -3.531750 | -1.588206 | C                                                          | 3.613298   | -3.560040 | 1.741942  |
| H         | -2.026537 | -2.565719 | -2.104559 | H                                                          | 3.796755   | -4.526618 | 2.257500  |
| H         | -2.603818 | -4.267784 | -2.006451 | H                                                          | 3.332109   | -2.811373 | 2.509018  |
| H         | -0.863162 | -3.901589 | -1.805130 | H                                                          | 4.569151   | -3.238278 | 1.285588  |

|    |           |           |           |   |           |           |           |
|----|-----------|-----------|-----------|---|-----------|-----------|-----------|
| C  | 1.208400  | -4.158622 | 1.447976  | H | 2.920131  | 1.866444  | -4.475372 |
| H  | 0.354885  | -4.357721 | 0.772677  | C | 2.452762  | 0.694406  | -2.713606 |
| H  | 0.891483  | -3.384341 | 2.170209  | C | 1.557691  | -3.097107 | -2.686034 |
| H  | 1.411091  | -5.089490 | 2.019258  | H | 1.192700  | -3.019126 | -1.642402 |
| C  | -3.492461 | 2.290662  | 0.539345  | C | 0.442146  | -3.745830 | -3.522727 |
| H  | -3.002273 | 1.976717  | -0.399103 | H | -0.437017 | -3.081941 | -3.619593 |
| H  | -3.751392 | 3.365981  | 0.443193  | H | 0.111299  | -4.691291 | -3.048215 |
| H  | -4.445481 | 1.730795  | 0.614215  | H | 0.793526  | -3.998229 | -4.544435 |
| C  | -1.469591 | 3.589981  | 2.502861  | C | 2.807316  | -3.999128 | -2.689548 |
| H  | -1.133755 | 3.574146  | 3.559558  | H | 3.222405  | -4.089861 | -3.714721 |
| H  | -2.082028 | 4.502368  | 2.348452  | H | 2.551064  | -5.018761 | -2.335784 |
| H  | -0.560715 | 3.653506  | 1.874948  | H | 3.611926  | -3.608547 | -2.036992 |
| C  | -3.743020 | 1.827571  | 3.481930  | C | 2.696595  | 1.833042  | -1.728547 |
| H  | -4.327180 | 0.888619  | 3.394835  | H | 1.919041  | 1.733957  | -0.943013 |
| H  | -4.456424 | 2.672899  | 3.377798  | C | 4.085735  | 1.725533  | -1.069103 |
| H  | -3.312102 | 1.874379  | 4.500167  | H | 4.227074  | 0.774298  | -0.522210 |
| C  | -1.806946 | -0.455497 | 4.805602  | H | 4.232384  | 2.552747  | -0.344603 |
| H  | -1.468259 | 0.492321  | 5.271355  | H | 4.886106  | 1.799873  | -1.834537 |
| H  | -1.437947 | -1.290539 | 5.438321  | C | 2.529733  | 3.218276  | -2.359645 |
| H  | -2.913274 | -0.476674 | 4.830693  | H | 3.348756  | 3.451528  | -3.071412 |
| C  | 0.770487  | -0.964634 | 3.354403  | H | 2.554791  | 3.997710  | -1.572218 |
| H  | 1.329982  | -1.076713 | 2.403442  | H | 1.567009  | 3.301935  | -2.895506 |
| H  | 0.922424  | -1.888330 | 3.951987  | C | 2.314418  | 0.527807  | 3.730533  |
| H  | 1.224430  | -0.122552 | 3.911088  | C | 2.813886  | 1.541184  | 2.684215  |
| C  | -1.791534 | -2.310719 | 2.392618  | H | 1.974568  | 2.060809  | 2.181699  |
| H  | -2.897278 | -2.271255 | 2.350964  | H | 3.436713  | 1.065745  | 1.901632  |
| H  | -1.509648 | -3.163156 | 3.045413  | H | 3.434427  | 2.311897  | 3.188735  |
| H  | -1.415201 | -2.520996 | 1.371639  | C | 3.507703  | -0.208804 | 4.354292  |
| C  | 1.301490  | 5.124980  | 0.044898  | H | 4.186612  | 0.534610  | 4.825830  |
| H  | 0.883550  | 5.256124  | 1.063674  | H | 4.111378  | -0.761336 | 3.608609  |
| H  | 0.737565  | 5.797472  | -0.636117 | H | 3.199081  | -0.915817 | 5.148263  |
| H  | 2.354212  | 5.466675  | 0.054381  | C | 1.562481  | 1.300334  | 4.838310  |
| C  | -0.696607 | 3.233548  | -1.149796 | H | 2.260344  | 2.007050  | 5.335631  |
| H  | -1.041389 | 2.203824  | -1.377719 | H | 1.153730  | 0.630309  | 5.620192  |
| H  | -0.855142 | 3.843292  | -2.063184 | H | 0.720428  | 1.889235  | 4.422611  |
| H  | -1.359332 | 3.642284  | -0.365072 | C | 0.805882  | -2.246017 | 3.635651  |
| C  | 2.228299  | 3.198019  | -2.119685 | C | 2.024506  | -3.181086 | 3.605258  |
| H  | 3.299518  | 3.218890  | -1.831980 | H | 1.757836  | -4.119692 | 4.137926  |
| H  | 2.046006  | 4.045013  | -2.814168 | H | 2.916084  | -2.764265 | 4.108097  |
| H  | 2.047784  | 2.257176  | -2.674144 | H | 2.295854  | -3.472055 | 2.572918  |
| C  | 3.898013  | 3.592178  | 1.490570  | C | 0.360222  | -2.036617 | 5.096359  |
| H  | 4.310335  | 3.546836  | 0.461326  | H | 0.020322  | -3.005091 | 5.520267  |
| H  | 4.747312  | 3.461965  | 2.193960  | H | -0.485467 | -1.325169 | 5.181679  |
| H  | 3.483020  | 4.605048  | 1.652460  | H | 1.187485  | -1.668073 | 5.734981  |
| C  | 1.826703  | 2.595582  | 3.503665  | C | -0.326121 | -2.908882 | 2.825574  |
| H  | 1.511972  | 3.658501  | 3.534450  | H | 0.000507  | -3.115878 | 1.787039  |
| H  | 2.520365  | 2.415906  | 4.351004  | H | -1.226928 | -2.272362 | 2.763298  |
| H  | 0.916085  | 1.982278  | 3.648194  | H | -0.603038 | -3.877889 | 3.293151  |
| C  | 3.744218  | 0.674769  | 2.011038  | C | -0.020521 | 3.149536  | 0.737770  |
| H  | 3.191802  | -0.264378 | 2.187471  | H | -0.050806 | 2.170543  | 1.267010  |
| H  | 4.439735  | 0.837940  | 2.861128  | H | -0.238921 | 3.930497  | 1.494170  |
| H  | 4.358581  | 0.543271  | 1.096190  | H | 1.015721  | 3.299059  | 0.372689  |
| N  | -1.267397 | -1.266015 | -1.533138 | C | -3.011357 | 3.471171  | -0.149450 |
| N  | 0.593847  | -2.034100 | -0.726779 | H | -3.639475 | 3.808477  | -0.998125 |
| N  | -1.333345 | 0.647321  | 1.938754  | H | -3.080550 | 4.241901  | 0.646108  |
| N  | 1.403702  | 2.054198  | 0.574614  | H | -3.443583 | 2.528346  | 0.232042  |
| Si | -2.439161 | 2.007643  | 2.105164  | C | -0.823640 | 4.770438  | -1.735358 |
| Si | -1.083018 | -0.675158 | 3.061897  | H | 0.207845  | 4.790955  | -2.134280 |
| Si | 1.110404  | 3.336862  | -0.586631 | H | -0.950888 | 5.650566  | -1.069520 |
| Si | 2.630870  | 2.205401  | 1.827417  | H | -1.527295 | 4.896878  | -2.583161 |
| P  | 2.215001  | -1.957113 | 0.044032  | C | -3.410995 | 2.121479  | -3.413294 |
| Co | 0.009534  | 0.701451  | 0.533429  | H | -4.106085 | 1.709994  | -2.654794 |
|    |           |           |           | H | -3.802530 | 1.854717  | -4.417589 |
|    |           |           |           | H | -3.441953 | 3.227615  | -3.329425 |
|    |           |           |           | C | -1.569847 | -0.321771 | -3.800204 |
|    |           |           |           | H | -0.544463 | -0.728461 | -3.701433 |
|    |           |           |           | H | -1.842570 | -0.357429 | -4.875484 |
|    |           |           |           | H | -2.268115 | -0.981252 | -3.251554 |
|    |           |           |           | C | -0.612157 | 2.456257  | -4.490508 |
|    |           |           |           | H | -0.547586 | 3.533532  | -4.242757 |
|    |           |           |           | H | -1.095257 | 2.367497  | -5.486598 |
|    |           |           |           | H | 0.415177  | 2.054112  | -4.577440 |
|    |           |           |           | C | -2.264638 | 1.944481  | 3.012547  |
|    |           |           |           | H | -1.211556 | 1.740397  | 3.290202  |
|    |           |           |           | H | -2.816705 | 2.216855  | 3.936285  |
|    |           |           |           | H | -2.288463 | 2.813537  | 2.332234  |
|    |           |           |           | C | -3.172060 | -0.787256 | 3.795515  |
|    |           |           |           | H | -3.549432 | -1.797050 | 3.546092  |
|    |           |           |           | H | -3.866584 | -0.341075 | 4.538503  |
|    |           |           |           | H | -2.187703 | -0.898875 | 4.289708  |
|    |           |           |           | C | -4.883461 | 0.768358  | 1.875873  |
|    |           |           |           | H | -4.999549 | 1.391993  | 0.967630  |
|    |           |           |           | H | -5.358738 | 1.308132  | 2.722046  |
|    |           |           |           | H | -5.459022 | -0.167139 | 1.716348  |
|    |           |           |           | C | -4.253860 | -1.048239 | -1.207385 |
|    |           |           |           | H | -5.167470 | -0.720367 | -0.672159 |
|    |           |           |           | H | -4.541573 | -1.861039 | -1.906763 |
|    |           |           |           | H | -3.891589 | -0.189727 | -1.803442 |
|    |           |           |           | C | -1.519574 | -2.466237 | -0.937459 |
|    |           |           |           | H | -0.911916 | -1.740966 | -1.519525 |
|    |           |           |           | H | -1.910820 | -3.212274 | -1.658651 |

Conformation 18.

Multiplicity: 4

Charge: 0

E(B97-3c) = -4478.408571759936 Hartree

E(M06/def2-TZVP) = -4478.395992495817 Hartree

E(PBE - D3(BJ)/def2-TZVP) = -4476.715088167532 Hartree

E(PBE0 - D3(BJ)/def2-TZVP) = -4477.088251999112 Hartree

E(PBEh-3c) = -4473.000947919019 Hartree

E(PM6) = -146.03076 Kcal/mol

E(PM7) = -212.78351 Kcal/mol

E( $\omega$ B97X-V/def2-TZVP) = -4480.435841460176 Hartree

E(GFN1-xTB) = -139.774287927001 Hartree

E(GFN2-xTB) = -136.962548868099 Hartree

E(GFN-FF) = -18.048705138171 Hartree

Coordinates:

|   |          |           |           |   |           |           |           |
|---|----------|-----------|-----------|---|-----------|-----------|-----------|
| C | 1.120977 | -0.474054 | 0.087169  | H | -2.187703 | -0.898875 | 4.289708  |
| C | 3.169215 | -1.455202 | -0.250811 | C | -4.883461 | 0.768358  | 1.875873  |
| H | 4.026360 | -1.794648 | -0.838117 | H | -4.999549 | 1.391993  | 0.967630  |
| C | 2.936485 | -1.463208 | 1.091541  | H | -5.358738 | 1.308132  | 2.722046  |
| H | 3.561207 | -1.821921 | 1.909420  | H | -5.459022 | -0.167139 | 1.716348  |
| C | 2.081782 | -0.602292 | -2.270789 | C | -4.253860 | -1.048239 | -1.207385 |
| C | 1.896528 | -1.688369 | -3.161072 | H | -5.167470 | -0.720367 | -0.672159 |
| C | 2.078096 | -1.442138 | -4.536702 | H | -4.541573 | -1.861039 | -1.906763 |
| H | 1.929339 | -2.263356 | -5.252705 | H | -3.891589 | -0.189727 | -1.803442 |
| C | 2.445217 | -0.176732 | -5.000862 | C | -1.519574 | -2.466237 | -0.937459 |
| H | 2.585563 | -0.004640 | -6.078644 | H | -0.911916 | -1.740966 | -1.519525 |
| C | 2.629466 | 0.877255  | -4.096731 | H | -1.910820 | -3.212274 | -1.658651 |

|    |           |           |           |
|----|-----------|-----------|-----------|
| H  | -0.837417 | -2.985006 | -0.234237 |
| C  | -3.746167 | -2.985028 | 1.071809  |
| H  | -3.046454 | -3.429495 | 1.807099  |
| H  | -4.095768 | -3.796690 | 0.399088  |
| H  | -4.631879 | -2.607915 | 1.622047  |
| N  | 2.060866  | -0.857227 | -0.849539 |
| N  | 1.689490  | -0.868669 | 1.289338  |
| N  | -1.026958 | 1.667699  | -1.570719 |
| N  | -2.202897 | -0.305404 | 0.920965  |
| Si | -1.226470 | 3.201670  | -0.736659 |
| Si | -1.626923 | 1.477044  | -3.211683 |
| Si | -3.061158 | 0.383040  | 2.291406  |
| Si | -2.928147 | -1.625560 | 0.020251  |
| P  | 0.921404  | -0.489597 | 2.870652  |
| Co | -0.733281 | 0.342398  | -0.180458 |

Conformation 19.

Multiplicity: 4

Charge: 0

E(B97-3c) = -4478.408422031329 Hartree  
 E(M06/def2-TZVP) = -4478.398017093015 Hartree  
 E(PBE - D3(BJ)/def2-TZVP) = -4476.714887455842 Hartree  
 E(PBE0 - D3(BJ)/def2-TZVP) = -4477.089377533198 Hartree  
 E(PBEh-3c) = -4473.006910938894 Hartree  
 E(PM6) = -144.35197 Kcal/mol  
 E(PM7) = -214.56319 Kcal/mol  
 E( $\omega$ B97X-V/def2-TZVP) = -4480.436973878229 Hartree  
 E(GFN1-xTB) = -139.773431813220 Hartree  
 E(GFN2-xTB) = -136.962891733865 Hartree  
 E(GFN-FF) = -18.064249752487 Hartree

Coordinates:

|   |           |           |           |
|---|-----------|-----------|-----------|
| C | 1.080817  | -0.624478 | -0.110882 |
| C | 2.912550  | -1.867421 | -0.712386 |
| H | 3.647162  | -2.291812 | -1.401995 |
| C | 2.804687  | -1.942045 | 0.646643  |
| H | 3.435770  | -2.451754 | 1.377361  |
| C | 1.795303  | -0.644619 | -2.541570 |
| C | 1.466094  | -1.594920 | -3.540038 |
| C | 1.490949  | -1.167769 | -4.882844 |
| H | 1.230959  | -1.882922 | -5.676648 |
| C | 1.823588  | 0.146230  | -5.218392 |
| H | 1.823160  | 0.463566  | -6.272044 |
| C | 2.162057  | 1.061030  | -4.213462 |
| H | 2.439161  | 2.086890  | -4.490444 |
| C | 2.172683  | 0.688647  | -2.857437 |
| C | 1.112117  | -3.044194 | -3.228305 |
| H | 0.903682  | -3.114975 | -2.142336 |
| C | -0.153754 | -3.501343 | -3.973752 |
| H | -0.984250 | -2.782007 | -3.844065 |
| H | -0.488310 | -4.487101 | -3.592967 |
| H | 0.032115  | -3.615422 | -5.061478 |
| C | 2.288094  | -3.984792 | -3.553622 |
| H | 2.537958  | -3.943340 | -4.633985 |
| H | 2.027499  | -5.034161 | -3.306113 |
| H | 3.206997  | -3.723202 | -2.992394 |
| C | 2.659245  | 1.658322  | -1.786579 |
| H | 2.008665  | 1.509218  | -0.900260 |
| C | 4.117254  | 1.341732  | -1.399282 |
| H | 4.241581  | 0.303828  | -1.035548 |
| H | 4.462019  | 2.023906  | -0.595805 |
| H | 4.787086  | 1.478245  | -2.273512 |
| C | 2.531336  | 3.126805  | -2.195460 |
| H | 3.244310  | 3.400624  | -3.000681 |
| H | 2.754408  | 3.781820  | -1.330228 |
| H | 1.505369  | 3.353491  | -2.537925 |
| C | 2.761164  | 0.212952  | 3.306174  |
| C | 3.387407  | 0.996080  | 2.139705  |
| H | 2.634507  | 1.582217  | 1.578916  |
| H | 3.907749  | 0.329351  | 1.425867  |
| H | 4.136597  | 1.712073  | 2.539884  |
| C | 3.834792  | -0.660638 | 3.966302  |
| H | 4.682537  | -0.014623 | 4.283097  |
| H | 4.248699  | -1.423846 | 3.278549  |
| H | 3.461107  | -1.171975 | 4.874238  |
| C | 2.206158  | 1.216569  | 4.342180  |
| H | 3.042841  | 1.809187  | 4.769848  |
| H | 1.691413  | 0.711123  | 5.183868  |
| H | 1.487321  | 1.920712  | 3.878654  |
| C | 0.845813  | -2.295312 | 3.515143  |
| C | 1.956003  | -3.352654 | 3.618599  |
| H | 1.544794  | -4.238325 | 4.149886  |
| H | 2.840495  | -3.012851 | 4.184318  |
| H | 2.282009  | -3.711361 | 2.623335  |
| C | 0.373084  | -1.893092 | 4.927172  |
| H | -0.046949 | -2.781999 | 5.443619  |
| H | -0.421990 | -1.120822 | 4.892506  |
| H | 1.203539  | -1.508596 | 5.553242  |
| C | -0.328156 | -2.899906 | 2.723106  |
| H | 0.021012  | -3.327177 | 1.762325  |
| H | -1.101337 | -2.145336 | 2.478798  |

|    |           |           |           |
|----|-----------|-----------|-----------|
| H  | -0.791796 | -3.721130 | 3.309934  |
| C  | 0.556736  | 3.308502  | 1.174440  |
| H  | 0.535124  | 2.295291  | 1.625717  |
| H  | 0.487290  | 4.049501  | 1.997041  |
| H  | 1.542745  | 3.433818  | 0.682646  |
| C  | -2.450473 | 4.021401  | 0.775247  |
| H  | -3.218215 | 4.284760  | 0.109643  |
| H  | -2.275872 | 4.921252  | 1.402434  |
| H  | -2.877864 | 3.233170  | 1.418815  |
| C  | -0.430712 | 5.075877  | -1.117924 |
| H  | 0.460753  | 4.975821  | -1.764702 |
| H  | -0.241464 | 5.906435  | -0.404721 |
| H  | -1.287673 | 5.379865  | -1.752607 |
| C  | -3.638451 | 2.434259  | -2.349167 |
| H  | -4.110797 | 1.887248  | -1.508510 |
| H  | -4.216954 | 2.218356  | -3.271756 |
| H  | -3.736787 | 3.519426  | -2.139242 |
| C  | -1.727204 | 0.207054  | -3.300481 |
| H  | -0.683300 | -0.060792 | -3.549804 |
| H  | -2.311927 | 0.194541  | -4.244035 |
| H  | -2.144611 | -0.580298 | -2.647006 |
| C  | -1.086483 | 3.078032  | -3.892693 |
| H  | -1.111874 | 4.150009  | -3.619739 |
| H  | -1.679282 | 2.951039  | -4.823287 |
| H  | -0.038895 | 2.801475  | -4.125703 |
| C  | -1.870364 | 1.488787  | 3.241712  |
| H  | -1.064726 | 0.942707  | 3.771042  |
| H  | -2.478081 | 2.032557  | 3.994827  |
| H  | -1.388525 | 2.241073  | 2.594108  |
| C  | -3.515363 | -0.953687 | 3.687508  |
| H  | -4.329055 | -1.636221 | 3.377495  |
| H  | -3.887233 | -0.358887 | 4.548837  |
| H  | -2.672482 | -1.575429 | 4.050599  |
| C  | -4.580413 | 1.121223  | 1.745020  |
| H  | -4.406609 | 1.737022  | 0.840760  |
| H  | -5.005661 | 1.774319  | 2.535462  |
| H  | -5.348319 | 0.362096  | 1.488837  |
| C  | -4.327446 | -1.271331 | -1.078777 |
| H  | -5.214900 | -0.974083 | -0.483549 |
| H  | -4.634226 | -2.107144 | -1.742572 |
| H  | -4.056592 | -0.409356 | -1.716665 |
| C  | -1.576131 | -2.702054 | -0.925883 |
| H  | -1.017453 | -2.000745 | -1.572825 |
| H  | -2.010142 | -3.492350 | -1.571237 |
| H  | -0.844696 | -3.175177 | -0.240090 |
| C  | -3.711383 | -3.174212 | 1.160439  |
| H  | -3.048584 | -3.529997 | 1.973097  |
| H  | -3.944803 | -4.041223 | 0.506400  |
| H  | -4.664797 | -2.840350 | 1.615812  |
| N  | 1.864284  | -1.063084 | -1.160755 |
| N  | 1.693861  | -1.178443 | 1.001639  |
| N  | -0.956575 | 2.016125  | -1.011146 |
| N  | -2.160850 | -0.496653 | 0.953992  |
| Si | -0.840602 | 3.516380  | -0.102120 |
| Si | -1.811186 | 1.943224  | -2.546985 |
| Si | -2.981703 | 0.261211  | 2.314782  |
| Si | -2.920373 | -1.818470 | 0.079671  |
| P  | 1.166675  | -0.633121 | 2.627899  |
| Co | -0.706530 | 0.372553  | -0.012773 |

Conformation 26.

Multiplicity: 4

Charge: 0

E(B97-3c) = -4478.408297694679 Hartree  
 E(M06/def2-TZVP) = -4478.395437685303 Hartree  
 E(PBE - D3(BJ)/def2-TZVP) = -4476.714917165678 Hartree  
 E(PBE0 - D3(BJ)/def2-TZVP) = -4477.087988543492 Hartree  
 E(PBEh-3c) = -4472.999788385364 Hartree  
 E(PM6) = -144.64162 Kcal/mol  
 E(PM7) = -214.11234 Kcal/mol  
 E( $\omega$ B97X-V/def2-TZVP) = -4480.435143783554 Hartree  
 E(GFN1-xTB) = -139.774534268981 Hartree  
 E(GFN2-xTB) = -136.962763915174 Hartree  
 E(GFN-FF) = -18.056701849400 Hartree

Coordinates:

|   |           |          |           |
|---|-----------|----------|-----------|
| C | 0.659939  | 0.921753 | -0.484431 |
| C | 1.671749  | 2.912631 | -1.018752 |
| H | 1.787752  | 3.999510 | -1.028365 |
| C | 2.380919  | 1.924740 | -1.633733 |
| H | 3.252862  | 1.985613 | -2.285473 |
| C | -0.371021 | 3.111034 | 0.314100  |
| C | -1.574289 | 3.361716 | -0.395822 |
| C | -2.468775 | 4.293860 | 0.159472  |
| H | -3.407763 | 4.516492 | -0.365313 |
| H | -2.183986 | 4.945806 | 1.366371  |
| H | -2.902860 | 5.668242 | 1.781469  |
| C | -0.993662 | 4.675756 | 2.046256  |
| H | -0.781650 | 5.188257 | 2.995867  |
| C | -0.054356 | 3.758964 | 1.533313  |
| C | -1.865434 | 2.685605 | -1.731043 |



|    |           |           |           |   |           |           |           |
|----|-----------|-----------|-----------|---|-----------|-----------|-----------|
| H  | -2.705946 | -0.642684 | 3.345014  | H | -2.335063 | -4.928202 | -0.021840 |
| H  | -1.547877 | 0.125978  | 2.223772  | H | -0.867236 | -5.904850 | 0.237863  |
| C  | -3.826258 | -3.104805 | 1.538098  | C | -1.213017 | -4.331113 | 2.436712  |
| H  | -4.620252 | -3.507910 | 0.881393  | H | -0.702958 | -5.279745 | 2.703623  |
| H  | -4.245136 | -3.023863 | 2.563817  | H | -2.306745 | -4.514833 | 2.450107  |
| H  | -2.999485 | -3.840912 | 1.567423  | H | -0.988806 | -3.592210 | 3.228306  |
| C  | -4.770413 | -0.299683 | 0.866209  | C | 3.184695  | -0.984874 | 2.549624  |
| H  | -4.530353 | 0.715603  | 0.496968  | H | 2.455990  | -0.154183 | 2.443661  |
| H  | -5.280636 | -0.201959 | 1.847457  | C | 3.269252  | -1.360367 | 4.044816  |
| H  | -5.497029 | -0.746360 | 0.156422  | H | 2.303028  | -1.706834 | 4.455955  |
| C  | -4.349465 | -3.073148 | -1.832501 | H | 3.600558  | -0.488066 | 4.644808  |
| H  | -4.023969 | -4.017176 | -1.350484 | H | 4.005699  | -2.176681 | 4.194366  |
| H  | -4.701800 | -3.323420 | -2.855922 | C | 4.552466  | -0.465540 | 2.090593  |
| H  | -5.220159 | -2.679272 | -1.270732 | H | 5.358534  | -1.201935 | 2.287708  |
| C  | -1.684673 | -2.709155 | -3.125396 | H | 4.811148  | 0.454882  | 2.651479  |
| H  | -0.655243 | -2.314248 | -3.071846 | H | 4.564853  | -0.224403 | 1.015695  |
| H  | -2.020237 | -2.654042 | -4.182316 | C | -0.333169 | 3.284749  | 2.793280  |
| H  | -1.641956 | -3.782311 | -2.848942 | C | 1.111954  | 2.759659  | 2.741049  |
| C  | -3.689242 | -0.305215 | -2.862896 | H | 1.458962  | 2.593330  | 1.703382  |
| H  | -4.671498 | -0.080121 | -2.398541 | H | 1.229057  | 1.808709  | 3.298236  |
| H  | -3.855717 | -0.470178 | -3.947567 | H | 1.790415  | 3.506941  | 3.204442  |
| H  | -3.055985 | 0.591302  | -2.725635 | C | -0.778296 | 3.411676  | 4.256619  |
| C  | -1.460679 | 3.031093  | -3.766247 | H | -0.082979 | 4.097691  | 4.787623  |
| H  | -2.440116 | 2.543362  | -3.944021 | H | -0.744475 | 2.444956  | 4.795358  |
| H  | -0.938021 | 3.104198  | -4.743352 | H | -1.795136 | 3.836567  | 4.360029  |
| H  | -1.651158 | 4.063384  | -3.411155 | C | -0.372781 | 4.674339  | 2.117817  |
| C  | -0.146925 | 0.336390  | -3.426589 | H | 0.292743  | 5.372488  | 2.668894  |
| H  | 0.423503  | -0.388397 | -2.810253 | H | -1.388175 | 5.116276  | 2.114622  |
| H  | 0.404907  | 0.470735  | -4.379609 | H | -0.020644 | 4.624204  | 1.067799  |
| H  | -1.119860 | -0.121523 | -3.678541 | C | -3.185878 | 2.121910  | 2.168546  |
| C  | 1.317442  | 2.851158  | -2.528876 | C | -3.531573 | 1.531754  | 3.544255  |
| H  | 1.275068  | 3.847943  | -2.046513 | H | -4.624473 | 1.646881  | 3.710623  |
| H  | 1.695490  | 2.989113  | -3.563622 | H | -3.019649 | 2.036768  | 4.383799  |
| H  | 2.055932  | 2.235121  | -1.978127 | H | -3.318348 | 0.446914  | 3.592100  |
| C  | -3.828118 | 3.114358  | -1.123871 | C | -3.709610 | 3.569216  | 2.079044  |
| H  | -3.747946 | 3.456981  | -2.173658 | H | -4.816910 | 3.558292  | 2.163740  |
| H  | -4.475284 | 3.833536  | -0.578597 | H | -3.461983 | 4.045176  | 1.108887  |
| H  | -4.340414 | 2.132062  | -1.130048 | H | -3.322437 | 4.211263  | 2.894326  |
| C  | -2.491372 | 2.697932  | 1.566007  | C | -3.872172 | 1.268282  | 1.088593  |
| H  | -3.162880 | 1.833175  | 1.725792  | H | -3.525189 | 0.217882  | 1.121144  |
| H  | -2.999500 | 3.595128  | 1.978025  | H | -3.666206 | 1.651064  | 0.073612  |
| H  | -1.568598 | 2.516684  | 2.150758  | H | -4.971288 | 1.266897  | 1.251248  |
| C  | -1.334631 | 4.725801  | -0.398184 | C | 0.763767  | -0.655053 | -4.677539 |
| H  | -0.372312 | 4.775312  | 0.148849  | H | -0.167119 | -0.120796 | -4.414111 |
| H  | -2.011777 | 5.491300  | 0.035662  | H | 0.537465  | -1.377209 | -5.489178 |
| H  | -1.135575 | 5.015804  | -1.449654 | H | 1.485746  | 0.090996  | -5.068614 |
| N  | 2.038329  | -1.208775 | -0.061850 | C | 0.343786  | -2.888218 | -2.529503 |
| N  | 1.727444  | 0.199719  | 1.558747  | H | 0.899339  | -3.474039 | -1.770896 |
| N  | -2.225937 | -1.339812 | -0.452613 | H | 0.031483  | -3.571680 | -3.345755 |
| N  | -1.084746 | 1.768989  | -0.974457 | C | -0.571661 | -2.494630 | -2.047400 |
| Si | -3.215362 | -1.385991 | 0.995248  | H | 3.061814  | -2.387107 | -3.703460 |
| Si | -2.924608 | -1.815910 | -1.995048 | H | 3.799440  | -1.703840 | -4.170203 |
| Si | -0.387872 | 2.007942  | -2.572501 | H | 2.776895  | -3.139187 | -4.469795 |
| Si | -2.132750 | 2.996166  | -0.272284 | H | 3.559897  | -2.921076 | -2.870073 |
| P  | 0.930702  | 1.373471  | 2.666975  | C | 3.586402  | 1.573051  | -3.277877 |
| Co | -0.813575 | -0.012358 | -0.274470 | H | 3.718836  | 0.903786  | -4.153134 |

Conformation 4.

Multiplicity: 4

Charge: 0

E(B97-3c) = -4478.403747200211 Hartree

E(M06/def2-TZVP) = -4478.391927752165 Hartree

E(PBE - D3(BJ)/def2-TZVP) = -4476.710135042079 Hartree

E(PBE0 - D3(BJ)/def2-TZVP) = -4477.084671617057 Hartree

E(PBEh-3c) = -4473.003533659517 Hartree

E(PM6) = -144.87756 Kcal/mol

E(PM7) = -201.17456 Kcal/mol

E( $\omega$ B97X-V/def2-TZVP) = -4480.435918014437 Hartree

E(GFN1-xTB) = -139.765169198715 Hartree

E(GFN2-xTB) = -136.953982957000 Hartree

E(GFN-FF) = -18.060843084280 Hartree

Coordinates:

|   |           |           |           |   |           |           |           |
|---|-----------|-----------|-----------|---|-----------|-----------|-----------|
| C | -0.091032 | -0.264198 | 1.148057  | H | -2.686195 | 1.927591  | -4.694758 |
| C | -0.034918 | -1.169120 | 3.257753  | C | 0.191595  | 3.054327  | -2.076473 |
| H | 0.230557  | -1.901072 | 4.024065  | H | 0.316060  | 3.114628  | -0.975573 |
| C | -0.747401 | -0.009131 | 3.337379  | H | 0.252533  | 4.085286  | -2.482645 |
| H | -1.217726 | 0.466616  | 4.197902  | H | 1.027338  | 2.462983  | -2.493537 |
| C | 1.264391  | -2.366098 | 1.528146  | C | -2.657585 | -1.321526 | -3.948190 |
| C | 0.733551  | -3.582349 | 1.030197  | H | -2.604089 | -0.594134 | -4.782971 |
| C | 1.652091  | -4.569517 | 0.624830  | H | -3.538264 | -1.974907 | -4.126018 |
| H | 1.276779  | -5.516378 | 0.212402  | H | -1.750560 | -1.952102 | -3.993018 |
| C | 3.032256  | -4.365658 | 0.740842  | C | -3.097479 | -1.802199 | -0.973341 |
| H | 3.731720  | -5.143885 | 0.399913  | H | -2.350235 | -2.607896 | -1.100224 |
| C | 3.524846  | -3.191057 | 1.321256  | H | -4.099736 | -2.265705 | -1.084237 |
| H | 4.608710  | -3.064483 | 1.455504  | H | -3.007439 | -1.413734 | 0.060113  |
| C | 2.653331  | -2.172308 | 1.749800  | C | -4.537385 | 0.458780  | -2.452839 |
| C | -0.766537 | -3.857896 | 1.036795  | H | -4.879219 | 0.951623  | -1.522566 |
| H | -1.279662 | -2.898448 | 0.822187  | H | -5.304686 | -0.290681 | -2.740134 |
| C | -1.228172 | -4.884256 | -0.006217 | H | -4.510198 | 1.223976  | -3.254857 |
| H | -0.882620 | -4.629943 | -1.024840 | N | 0.362340  | -1.311280 | 1.931656  |

|    |           |           |           |   |          |           |          |
|----|-----------|-----------|-----------|---|----------|-----------|----------|
| N  | -0.777679 | 0.535043  | 2.054178  | C | 1.965744 | -2.848547 | 2.037087 |
| N  | 1.682324  | -0.344506 | -1.829911 | H | 1.036462 | -3.268773 | 2.470141 |
| N  | -1.535731 | 0.633796  | -1.839492 | H | 2.798207 | -3.551919 | 2.244332 |
| Si | 1.474917  | -1.499304 | -3.139695 | H | 1.833582 | -2.789900 | 0.940456 |
| Si | 3.176185  | 0.563474  | -1.714077 | C | 2.186025 | -1.440157 | 4.675052 |
| Si | -1.475584 | 2.267075  | -2.494906 | H | 2.454268 | -0.545732 | 5.272061 |
| Si | -2.861003 | -0.436287 | -2.276212 | H | 2.919320 | -2.236427 | 4.924805 |
| P  | -1.355424 | 2.176735  | 1.593128  | H | 1.183427 | -1.787595 | 4.995405 |
| Co | 0.045973  | 0.046738  | -0.871347 | C | 2.037467 | 2.436696  | 3.764383 |

Conformation 7.

Multiplicity: 4

Charge: 0

E(B97-3c) = -4478.403849343878 Hartree  
 E(M06/def2-TZVP) = -4478.392241751249 Hartree  
 E(PBE - D3(BJ)/def2-TZVP) = -4476.710100065953 Hartree  
 E(PBE0 - D3(BJ)/def2-TZVP) = -4477.084187301767 Hartree  
 E(PBEh-3c) = -4473.001684774375 Hartree  
 E(PM6) = -143.67055 Kcal/mol  
 E(PM7) = -196.38174 Kcal/mol  
 E( $\omega$ B97X-V/def2-TZVP) = -4480.432182199037 Hartree  
 E(GFN1-xTB) = -139.766908000021 Hartree  
 E(GFN2-xTB) = -136.956592775997 Hartree  
 E(GFN-FF) = -18.064664554368 Hartree

Coordinates:

|   |           |           |           |
|---|-----------|-----------|-----------|
| C | -1.177992 | -0.050136 | -0.283416 |
| C | -3.462870 | -0.265390 | -0.381536 |
| H | -4.445241 | -0.631592 | -0.074660 |
| C | -3.088648 | 0.522230  | -1.429373 |
| H | -3.693089 | 0.995780  | -2.204446 |
| C | -2.336702 | -1.429499 | 1.487919  |
| C | -1.780314 | -2.736360 | 1.435398  |
| C | -1.800976 | -3.488224 | 2.624954  |
| H | -1.364638 | -4.495086 | 2.633569  |
| C | -2.377934 | -2.986954 | 3.798550  |
| H | -2.367801 | -3.593751 | 4.716472  |
| C | -3.000135 | -1.736578 | 3.792943  |
| H | -3.499136 | -1.372044 | 4.702851  |
| C | -3.009571 | -0.933141 | 2.636055  |
| C | -1.238137 | -3.336606 | 0.136700  |
| H | -0.448015 | -2.646112 | -0.234156 |
| C | -0.609743 | -4.724096 | 0.312872  |
| H | 0.211349  | -4.730709 | 1.053434  |
| H | -0.190336 | -5.065557 | -0.652986 |
| H | -1.368525 | -5.471560 | 0.625271  |
| C | -2.315196 | -3.434742 | -0.964555 |
| H | -3.144915 | -4.039846 | -0.639846 |
| H | -1.870026 | -3.875185 | -1.879677 |
| H | -2.748114 | -2.458255 | -1.247336 |
| C | -3.852320 | 0.342697  | 2.627544  |
| H | -3.578628 | 0.936031  | 1.731645  |
| C | -5.344353 | -0.036878 | 2.513001  |
| H | -5.549106 | -0.716631 | 1.661777  |
| H | -5.973599 | 0.868733  | 2.392657  |
| H | -5.680003 | -0.564191 | 3.429597  |
| C | -3.649198 | 1.255718  | 3.844253  |
| H | -3.922939 | 0.751497  | 4.793448  |
| H | -4.297051 | 2.150794  | 3.751574  |
| H | -2.604154 | 1.596035  | 3.928694  |
| C | -1.562987 | 3.294863  | -2.542264 |
| C | -1.966430 | 3.668018  | -1.104673 |
| H | -1.124938 | 3.556821  | -0.393021 |
| H | -2.807129 | 3.052943  | -0.727915 |
| H | -2.287057 | 4.731228  | -1.079856 |
| C | -2.772846 | 3.431739  | -3.476364 |
| H | -3.153360 | 4.475060  | -3.424068 |
| H | -3.615923 | 2.772359  | -3.193143 |
| H | -2.516065 | 3.233187  | -4.534407 |
| C | -0.454230 | 4.268428  | -3.005319 |
| H | -0.857596 | 5.303147  | -3.031129 |
| H | -0.078996 | 4.031192  | -4.020293 |
| H | 0.411079  | 4.255845  | -2.312911 |
| C | -0.855195 | 0.623879  | -4.071386 |
| C | -2.274063 | 0.246950  | -4.521905 |
| H | -2.205034 | -0.315607 | -5.478180 |
| H | -2.922704 | 1.122654  | -4.703895 |
| H | -2.773069 | -0.422469 | -3.794803 |
| C | -0.146573 | 1.424685  | -5.180041 |
| H | -0.064001 | 0.790826  | -6.088435 |
| H | 0.880391  | 1.720859  | -4.889278 |
| H | -0.707497 | 2.336668  | -5.466024 |
| C | -0.070354 | -0.668950 | -3.785673 |
| H | -0.592714 | -1.292405 | -3.032663 |
| H | 0.940127  | -0.456731 | -3.388023 |
| H | 0.025942  | -1.269492 | -4.715290 |
| C | 4.029183  | -0.548405 | 2.421841  |
| H | 4.131867  | -0.372372 | 1.335553  |
| H | 4.799036  | -1.284638 | 2.732803  |
| H | 4.232273  | 0.409443  | 2.943000  |

Conformation 9.

Multiplicity: 4

Charge: 0

E(B97-3c) = -4478.408218852044 Hartree  
 E(M06/def2-TZVP) = -4478.397373388160 Hartree  
 E(PBE - D3(BJ)/def2-TZVP) = -4476.714735189170 Hartree  
 E(PBE0 - D3(BJ)/def2-TZVP) = -4477.088699543199 Hartree  
 E(PBEh-3c) = -4473.006023753136 Hartree  
 E(PM6) = -146.48849 Kcal/mol  
 E(PM7) = -214.72955 Kcal/mol  
 E( $\omega$ B97X-V/def2-TZVP) = -4480.436636196658 Hartree  
 E(GFN1-xTB) = -139.772890041799 Hartree  
 E(GFN2-xTB) = -136.962622835129 Hartree  
 E(GFN-FF) = -18.065813191970 Hartree

Coordinates:

|   |           |           |           |
|---|-----------|-----------|-----------|
| C | 0.590487  | 0.170859  | -1.041947 |
| C | 1.632658  | -0.256072 | -3.040777 |
| H | 1.721547  | -0.648984 | -4.056752 |
| C | 2.502234  | 0.468866  | -2.279578 |
| H | 3.516464  | 0.805874  | -2.497410 |
| C | -0.723471 | -0.977680 | -2.880672 |
| C | -0.712957 | -2.324019 | -3.328865 |
| C | -1.866834 | -2.809224 | -3.976906 |
| H | -1.884970 | -3.852392 | -4.324622 |
| H | -2.984118 | -1.996804 | -4.172479 |
| H | -3.880375 | -2.398428 | -4.668649 |
| C | -2.961312 | -0.664823 | -3.741228 |
| H | -3.838813 | -0.029657 | -3.918931 |
| C | -1.834657 | -0.116461 | -3.103072 |
| C | 0.477707  | -3.262780 | -3.164002 |
| H | 1.191906  | -2.790214 | -2.641803 |
| C | 0.063975  | -4.615798 | -2.557358 |
| H | -0.544089 | -4.483412 | -1.642954 |
| H | 0.963343  | -5.207311 | -2.292895 |
| H | -0.527662 | -5.220202 | -3.275195 |

|   |           |           |           |
|---|-----------|-----------|-----------|
| C | 1.200347  | -3.487306 | -4.506157 |
| H | 0.527314  | -3.975723 | -5.240809 |
| H | 2.082739  | -4.144840 | -4.367401 |
| H | 1.550998  | -2.541195 | -4.965097 |
| C | -1.792747 | 1.366777  | -2.746923 |
| H | -1.365222 | 1.437274  | -1.724614 |
| C | -0.879831 | 2.135203  | -3.723567 |
| H | 0.163024  | 1.763752  | -3.717076 |
| H | -0.855340 | 3.212442  | -3.461628 |
| H | -1.263020 | 2.049321  | -4.761618 |
| C | -3.174759 | 2.023120  | -2.706773 |
| H | -3.628888 | 2.097680  | -3.716746 |
| H | -3.092151 | 3.054985  | -2.311506 |
| H | -3.868566 | 1.466165  | -2.050075 |
| C | 2.568156  | 3.516804  | -0.715273 |
| C | 3.305130  | 3.520221  | -2.062219 |
| H | 2.744846  | 2.959002  | -2.834405 |
| H | 4.331914  | 3.115700  | -2.003420 |
| H | 3.384927  | 4.568678  | -2.423105 |
| C | 3.256028  | 4.480193  | 0.271401  |
| H | 3.164737  | 5.519679  | -0.109034 |
| H | 4.336079  | 4.264678  | 0.389420  |
| H | 2.781485  | 4.452063  | 1.274528  |
| C | 1.123619  | 3.996974  | -0.949531 |
| H | 1.137339  | 4.968140  | -1.489452 |
| H | 0.576118  | 4.140451  | 0.000556  |
| H | 0.547364  | 3.279059  | -1.565530 |
| C | 4.085944  | 1.156451  | 0.704138  |
| C | 5.281295  | 1.432736  | -0.217223 |
| H | 6.180820  | 0.933430  | 0.203790  |
| H | 5.516903  | 2.511565  | -0.299271 |
| H | 5.140867  | 1.025677  | -1.237535 |
| C | 4.376987  | 1.742292  | 2.103716  |
| H | 5.292550  | 1.267729  | 2.516660  |
| H | 3.547754  | 1.541562  | 2.808893  |
| H | 4.552007  | 2.834984  | 2.079389  |
| C | 3.861641  | -0.359696 | 0.842753  |
| H | 3.803803  | -0.859658 | -0.144348 |
| H | 2.922136  | -0.578932 | 1.391673  |
| H | 4.710352  | -0.809245 | 1.400453  |
| C | -4.127534 | -1.819949 | 2.307480  |
| H | -3.317875 | -1.927422 | 3.057609  |
| H | -4.665239 | -2.788624 | 2.237181  |
| H | -4.844543 | -1.067227 | 2.695684  |
| C | -2.507048 | -2.765748 | -0.136671 |
| H | -2.147305 | -1.154497 | -1.154497 |
| H | -3.205931 | -3.623617 | -0.225841 |
| H | -1.647862 | -3.104066 | 0.469611  |
| C | -4.925541 | -1.046148 | -0.540224 |
| H | -5.641480 | -0.284448 | -0.178349 |
| H | -5.472356 | -2.008437 | -0.632768 |
| H | -4.588640 | -0.755872 | -1.555466 |
| C | -1.817830 | 3.017516  | 0.805658  |
| H | -0.763414 | 2.683062  | 0.877274  |
| H | -1.924448 | 3.936052  | 1.418685  |
| H | -2.005432 | 3.286496  | -0.253246 |
| C | -3.190793 | 1.725708  | 3.260785  |
| H | -3.876339 | 0.930044  | 3.616224  |
| H | -3.634407 | 2.703235  | 3.546235  |
| H | -2.237878 | 1.612943  | 3.807645  |
| C | -4.743607 | 2.130315  | 0.757503  |
| H | -4.858758 | 2.085547  | -0.341862 |
| H | -4.939856 | 3.175828  | 1.077592  |
| H | -5.529181 | 1.495148  | 1.214856  |
| C | 0.482338  | 1.910703  | 3.513217  |
| H | 1.387348  | 2.282732  | 2.994132  |
| H | 0.429002  | 2.386751  | 4.514680  |
| H | -0.391297 | 2.254577  | 2.931528  |
| C | 2.167736  | -0.267753 | 4.728186  |
| H | 2.173243  | -1.255416 | 5.229019  |
| H | 2.240908  | 0.505779  | 5.521934  |
| H | 3.083556  | -0.202853 | 4.107538  |
| C | -0.853601 | -0.559412 | 4.838348  |
| H | -1.806473 | -0.601181 | 4.275961  |
| H | -0.994777 | 0.107695  | 5.714228  |
| H | -0.644973 | -1.579036 | 5.222399  |
| C | -0.482945 | -3.603614 | 2.862103  |
| H | -0.415650 | -3.571960 | 3.968959  |
| H | -0.386376 | -4.665436 | 2.552070  |
| C | -1.495052 | -3.252374 | 2.585207  |
| H | 1.152426  | -2.992246 | 0.280818  |
| H | 0.308741  | -2.651898 | -0.346967 |
| H | 1.252732  | -4.088635 | 0.151503  |
| H | 2.072696  | -2.510332 | -0.105775 |
| C | 2.480011  | -3.100730 | 2.995816  |
| H | 3.368310  | -2.490433 | 2.742343  |
| H | 2.689180  | -4.148342 | 2.690730  |
| H | 2.363926  | -3.094713 | 4.096923  |
| N | 0.468846  | -0.418252 | -2.287742 |
| N | 1.848892  | 0.752190  | -1.080079 |
| N | -2.393104 | 0.117400  | 0.752811  |

## AQINUK

Conformation 13.

Multiplicity: 2

Charge: 0

E(B97-3c) = -14780.095388065132 Hartree

E(M06/def2-TZVP) = -14775.725164253348 Hartree

E(PBE - D3(BJ)/def2-TZVP) = -14773.096709391895 Hartree

E(PBE0 - D3(BJ)/def2-TZVP) = -14773.633988185265 Hartree

E(PBEh-3c) = -14765.504047416023 Hartree

E(PM6) = 117.70812 Kcal/mol

E(PM7) = 60.57875 Kcal/mol

E( $\omega$ B97X-V/def2-TZVP) = -14776.333673339606 Hartree

E(GFN1-xTB) = -208.694566201214 Hartree

E(GFN2-xTB) = -205.331427868363 Hartree

E(GFN-FF) = -24.580282218097 Hartree

Coordinates:

|   |           |           |           |
|---|-----------|-----------|-----------|
| C | 1.788253  | 2.709541  | 0.888428  |
| C | 2.277646  | 3.934097  | 0.273004  |
| C | 1.622811  | 4.064619  | -0.940796 |
| C | 0.732941  | 2.920224  | -1.067260 |
| C | -0.247300 | 2.710609  | -2.067635 |
| C | -0.844599 | 1.449927  | -2.291035 |
| C | -1.945794 | 1.216881  | -3.204714 |
| H | -2.494404 | 1.997843  | -3.740570 |
| C | -2.155122 | -0.139544 | -3.237092 |
| H | -2.909266 | -0.693048 | -3.805452 |
| C | -1.180980 | -0.735799 | -2.344472 |
| C | -0.988998 | -2.126448 | -2.187769 |
| C | -0.113131 | -2.666604 | -1.214507 |
| C | 0.407085  | -4.024634 | -1.162970 |
| C | 1.074650  | -4.154925 | 0.044013  |
| C | 0.959318  | -2.877249 | 0.731529  |
| C | 1.342092  | -2.588981 | 2.064515  |
| C | 1.483331  | -1.267318 | 2.542620  |
| C | 1.742859  | -0.920517 | 3.925819  |
| H | 1.757932  | -1.628497 | 4.760546  |
| H | 1.943208  | 0.437215  | 3.963937  |
| C | 2.156022  | 1.063914  | 4.835787  |
| C | 1.805828  | 0.919879  | 2.603944  |
| C | 2.057041  | 2.250282  | 2.200677  |
| C | -0.720775 | 3.859700  | -2.880007 |
| C | -0.645622 | 3.854177  | -4.286880 |
| H | -0.201472 | 2.985684  | -4.795545 |
| C | -1.086719 | 4.945127  | -5.048801 |
| H | -0.991628 | 4.910371  | -6.141946 |
| C | -1.635212 | 6.073111  | -4.402161 |
| C | -1.735322 | 6.083028  | -2.992570 |
| H | -2.175275 | 6.966052  | -2.507200 |
| C | -1.279102 | 4.997206  | -2.249001 |
| H | -1.352931 | 5.017026  | -1.151281 |
| C | -2.005232 | 7.246833  | -6.464002 |
| H | -2.599564 | 6.200090  | -6.917385 |
| H | -0.944814 | 7.112609  | -6.784198 |
| C | -2.531138 | 8.602280  | -6.909941 |
| H | -3.585018 | 8.702111  | -6.569065 |
| H | -2.561601 | 8.606586  | -8.021516 |
| C | -1.704042 | 9.786295  | -6.399432 |
| H | -1.650037 | 9.727342  | -5.291989 |
| H | -0.656665 | 9.679036  | -6.760570 |
| C | -2.264820 | 11.141870 | -6.827746 |
| H | -1.647461 | 11.978996 | -6.444694 |
| H | -3.297779 | 11.288578 | -6.448442 |
| H | -2.304527 | 11.234793 | -7.933556 |
| C | -1.784051 | -3.044568 | -3.041074 |
| C | -1.722467 | -2.993738 | -4.454059 |
| H | -1.050282 | -2.268227 | -4.935585 |
| C | -2.465383 | -3.874492 | -5.238744 |
| H | -2.404474 | -3.855652 | -6.336456 |
| C | -3.311582 | -4.830399 | -4.632635 |
| C | -3.401471 | -4.880148 | -3.225130 |
| H | -4.060176 | -5.602279 | -2.725398 |
| C | -2.638208 | -3.997663 | -2.450596 |
| H | -2.705625 | -4.046324 | -1.353242 |
| C | -4.832008 | -6.659595 | -4.930110 |
| H | -5.640427 | -6.197070 | -4.314668 |
| H | -4.237985 | -7.316166 | -4.253833 |
| C | -5.429747 | -7.450861 | -6.084844 |
| H | -4.598873 | -7.898667 | -6.672325 |
| H | -5.939634 | -6.734053 | -6.762265 |
| C | -6.412299 | -8.542511 | -5.640642 |



|    |           |            |           |   |           |            |            |
|----|-----------|------------|-----------|---|-----------|------------|------------|
| H  | -6.884733 | -8.973777  | -6.548379 | H | -1.455682 | -4.636765  | 1.520662   |
| H  | -7.244040 | -8.076672  | -5.065933 | C | -1.140913 | -2.798293  | 0.237383   |
| C  | -5.785292 | -9.670279  | -4.815464 | C | -0.760670 | -3.381882  | -0.991565  |
| H  | -6.527599 | -10.460580 | -4.584949 | C | -0.286968 | -2.613194  | -2.082905  |
| H  | -5.383238 | -9.309640  | -3.846412 | C | -0.179748 | -3.038174  | -3.470715  |
| H  | -4.946548 | -10.149656 | -5.362621 | C | 0.483283  | -2.030154  | -4.151304  |
| C  | 1.550123  | -3.707625  | 3.016310  | C | 0.785608  | -0.990631  | -3.178668  |
| C  | 0.522843  | -4.647135  | 3.240148  | C | 1.594003  | 0.154343   | -3.378694  |
| H  | -0.435481 | -4.525435  | 2.713091  | C | 1.592894  | 1.249322   | -2.485875  |
| C  | 0.696436  | -5.732704  | 4.105672  | C | 2.508140  | 2.507590   | -2.575590  |
| H  | -0.129950 | -6.442127  | 4.245184  | H | 3.350448  | 2.446988   | -3.262552  |
| C  | 1.929229  | -5.907470  | 4.771584  | C | 2.116662  | 3.273617   | -1.610522  |
| C  | 2.959531  | -4.961252  | 4.572880  | H | 2.573173  | 4.237548   | -1.364633  |
| H  | 3.913289  | -5.115172  | 5.097893  | C | 0.958645  | 2.706777   | -0.947908  |
| C  | 2.767929  | -3.878197  | 3.715802  | C | 0.179195  | 3.384761   | 0.015122   |
| H  | 3.588026  | -3.164620  | 3.547509  | C | -3.001889 | -0.217233  | 3.625946   |
| C  | 1.303940  | -8.021712  | 5.733139  | C | -4.195431 | -0.954143  | 3.757174   |
| H  | 0.268472  | -7.645161  | 5.888993  | H | -4.614434 | -1.455936  | 2.872331   |
| H  | 1.599142  | -8.545868  | 6.664956  | C | -4.880030 | -1.029290  | 4.978341   |
| C  | 1.390104  | -8.976920  | 4.541827  | H | -5.818485 | -1.596201  | 5.034219   |
| H  | 1.222764  | -8.408829  | 3.600893  | C | -4.360803 | -0.368983  | 6.112210   |
| H  | 2.430697  | -9.360204  | 4.490009  | C | -3.152523 | 0.555237   | 5.999481   |
| C  | 0.397006  | -10.144864 | 4.620639  | H | -2.757933 | 0.854070   | 6.896321   |
| H  | 0.523491  | -10.673622 | 5.592200  | C | -2.492381 | 0.432831   | 4.775505   |
| H  | 0.667915  | -10.887935 | 3.841262  | H | -1.557435 | 1.007316   | 4.694270   |
| C  | -1.068828 | -9.738664  | 4.438483  | C | -6.178485 | -1.061417  | 7.520647   |
| H  | -1.738658 | -10.621692 | 4.455080  | H | -6.046609 | -2.144945  | 7.295061   |
| H  | -1.221349 | -9.222009  | 3.467687  | H | -6.939339 | -0.660200  | 6.809955   |
| H  | -1.418148 | -9.052082  | 5.237011  | C | -6.628979 | -0.857192  | 8.958870   |
| C  | 2.569829  | 3.202994   | 3.217204  | H | -5.845695 | -1.264136  | 9.635366   |
| C  | 1.843407  | 4.370183   | 3.526764  | H | -7.536221 | -1.478896  | 9.122944   |
| H  | 0.894065  | 4.563086   | 3.004540  | C | -6.917851 | 0.604174   | 9.315797   |
| C  | 2.300530  | 5.288498   | 4.480484  | H | -6.012760 | 1.207302   | 9.092321   |
| H  | 1.701597  | 6.183038   | 4.694960  | H | -7.714817 | 0.991214   | 8.642065   |
| C  | 3.522555  | 5.053266   | 5.145632  | C | -7.331192 | 0.797651   | 10.774389  |
| C  | 4.258438  | 3.883427   | 4.850646  | H | -7.532212 | 1.863262   | 11.004005  |
| H  | 5.210514  | 3.719712   | 5.375915  | H | -6.536039 | 0.451421   | 11.467353  |
| C  | 3.783048  | 2.972727   | 3.908423  | H | -8.250951 | 0.224566   | 11.016690  |
| H  | 4.373479  | 2.075339   | 3.671340  | C | -0.817381 | -4.860410  | -1.111964  |
| C  | 3.392108  | 7.098329   | 6.396209  | C | 0.344835  | -5.590484  | -1.432252  |
| H  | 2.380578  | 6.864268   | 6.802238  | H | 1.288958  | -5.047640  | -1.590371  |
| H  | 3.246943  | 7.706342   | 5.471727  | C | 0.326281  | -6.985684  | -1.554151  |
| C  | 4.208280  | 7.873348   | 7.421704  | H | 1.255664  | -7.515442  | -1.799951  |
| H  | 3.545053  | 8.673871   | 7.813944  | C | -0.883563 | -7.686206  | -1.363011  |
| H  | 4.420827  | 7.199859   | 8.280955  | C | -2.055916 | -6.968271  | -1.035260  |
| C  | 5.509337  | 8.508465   | 6.907842  | H | -2.990673 | -7.531157  | -0.899157  |
| H  | 5.877920  | 9.209814   | 7.687544  | C | -2.017987 | -5.580847  | -0.905750  |
| H  | 5.270723  | 9.145007   | 6.025955  | H | -2.940745 | -5.029497  | -0.672273  |
| C  | 6.627767  | 7.526803   | 6.548119  | C | 0.118147  | -9.818221  | -1.826418  |
| H  | 7.550933  | 8.066830   | 6.255172  | H | 0.935456  | -9.662915  | -1.082320  |
| H  | 6.338560  | 6.860427   | 5.713154  | H | 0.502021  | -9.481161  | -2.817184  |
| H  | 6.879004  | 6.875307   | 7.410985  | C | -0.276782 | -11.287686 | -1.7882180 |
| N  | 0.920411  | 2.085224   | 0.015529  | H | 0.555852  | -11.819357 | -2.390676  |
| N  | -0.426936 | 0.253099   | -1.745541 | H | -1.160613 | -11.387506 | -2.549875  |
| N  | 0.309272  | -1.981977  | -0.093398 | C | -0.550904 | -11.964049 | -0.530267  |
| N  | 1.479706  | -0.126813  | 1.765696  | H | 0.332836  | -11.811595 | 0.129772   |
| O  | -2.091068 | 7.181429   | -5.041652 | H | -0.606515 | -13.060964 | -0.701445  |
| O  | -3.992164 | -5.647487  | -5.477737 | C | -1.820053 | -11.505044 | 0.192936   |
| O  | 2.216661  | -6.929401  | 5.622331  | H | -1.975806 | -12.082826 | 1.126539   |
| O  | 4.066763  | 5.882514   | 6.074328  | H | -2.716599 | -11.649959 | -0.445281  |
| Cu | 0.563389  | 0.059091   | -0.010550 | H | -1.778633 | -10.430407 | 0.454372   |
| Br | 3.682255  | 5.044376   | 0.835616  | C | 2.526363  | 0.202181   | -4.533213  |
| Br | 2.031334  | 5.374041   | -2.221258 | C | 3.513611  | -0.790462  | -4.696116  |
| Br | 0.419119  | -5.322204  | -2.518822 | H | 3.581468  | -1.603117  | -3.957055  |
| Br | 2.108715  | -5.648911  | 0.518500  | C | 4.410786  | -0.765009  | -5.770862  |
|    |           |            |           | H | 5.169152  | -1.554503  | -5.853379  |
|    |           |            |           | C | 4.324923  | 0.266716   | -6.730312  |
|    |           |            |           | C | 3.344055  | 1.271948   | -6.574796  |
|    |           |            |           | H | 3.288183  | 2.064291   | -7.335178  |
|    |           |            |           | C | 2.467738  | 1.241892   | -5.490627  |
|    |           |            |           | H | 1.696852  | 2.020253   | -5.390536  |
|    |           |            |           | C | 6.193431  | -0.537951  | -8.033030  |
|    |           |            |           | H | 6.428962  | -0.451486  | -9.112574  |
|    |           |            |           | H | 5.857407  | -1.583833  | -7.855793  |
|    |           |            |           | C | 7.424633  | -0.202758  | -7.188751  |
|    |           |            |           | H | 7.214688  | -0.417559  | -6.119826  |
|    |           |            |           | H | 8.231245  | -0.907043  | -7.492650  |
|    |           |            |           | C | 7.910489  | 1.247625   | -7.324453  |
|    |           |            |           | H | 8.776460  | 1.387301   | -6.642939  |
|    |           |            |           | H | 7.115685  | 1.926847   | -6.948711  |
|    |           |            |           | C | 8.302540  | 1.658995   | -8.744895  |
|    |           |            |           | H | 8.721323  | 2.685146   | -8.763183  |
|    |           |            |           | H | 7.431395  | 1.653193   | -9.431576  |
|    |           |            |           | H | 9.070795  | 0.978614   | -9.170014  |
|    |           |            |           | C | 0.526358  | 4.792001   | 0.335550   |
|    |           |            |           | C | 0.863906  | 5.152888   | 1.655457   |
|    |           |            |           | H | 0.865025  | 4.377739   | 2.436607   |
|    |           |            |           | C | 1.196554  | 6.470383   | 1.994710   |
|    |           |            |           | H | 1.458991  | 6.707648   | 3.033748   |
|    |           |            |           | C | 1.185090  | 7.470646   | 0.999447   |
|    |           |            |           | C | 0.854759  | 7.122473   | -0.329872  |

Conformation 15.  
 Multiplicity: 2  
 Charge: 0  
 E(B97-3c) = -14780.094958319898 Hartree  
 E(M06/def2-TZVP) = -14775.724403138262 Hartree  
 E(PBE - D3(BJ)/def2-TZVP) = -14773.096372453192 Hartree  
 E(PBE0 - D3(BJ)/def2-TZVP) = -14773.633503454097 Hartree  
 E(PBEh-3c) = -14765.504187436916 Hartree  
 E(PM6) = 120.01410 Kcal/mol  
 E(PM7) = 62.93994 Kcal/mol  
 E( $\omega$ B97X-V/def2-TZVP) = -14776.333607107197 Hartree  
 E(GFN1-xTB) = -208.695170886094 Hartree  
 E(GFN2-xTB) = -205.329612273747 Hartree  
 E(GFN-FF) = -24.581360634561 Hartree

Coordinates:

|   |           |           |          |   |          |          |           |
|---|-----------|-----------|----------|---|----------|----------|-----------|
| C | -0.878497 | 2.754524  | 0.715242 | H | 7.431395 | 1.653193 | -9.431576 |
| C | -1.939705 | 3.407405  | 1.466949 | H | 9.070795 | 0.978614 | -9.170014 |
| C | -2.644332 | 2.409031  | 2.119449 | C | 0.526358 | 4.792001 | 0.335550  |
| C | -2.010044 | 1.146430  | 1.771374 | C | 0.863906 | 5.152888 | 1.655457  |
| C | -2.279482 | -0.125497 | 2.331870 | H | 0.865025 | 4.377739 | 2.436607  |
| C | -1.832803 | -1.326374 | 1.736663 | C | 1.196554 | 6.470383 | 1.994710  |
| C | -1.954004 | -2.635709 | 2.347012 | H | 1.458991 | 6.707648 | 3.033748  |
| H | -2.312196 | -2.825079 | 3.363869 | C | 1.185090 | 7.470646 | 0.999447  |
| C | -1.522074 | -3.549071 | 1.417438 | C | 0.854759 | 7.122473 | -0.329872 |

|    |           |           |           |   |           |           |           |
|----|-----------|-----------|-----------|---|-----------|-----------|-----------|
| H  | 0.846526  | 7.916880  | -1.090120 | H | 8.817677  | 4.718483  | 9.359053  |
| C  | 0.539463  | 5.803808  | -0.653877 | H | 9.463215  | 3.238755  | 10.126235 |
| H  | 0.263187  | 5.546844  | -1.687145 | C | 3.526806  | -2.086917 | -2.710965 |
| C  | 1.789386  | 9.205812  | 2.544549  | C | 4.604860  | -2.907094 | -2.304356 |
| H  | 2.699040  | 8.667516  | 2.898807  | H | 4.678558  | -3.212232 | -1.250022 |
| H  | 0.954492  | 8.939645  | 3.235479  | C | 5.537608  | -3.377822 | -3.228233 |
| C  | 2.027032  | 10.709797 | 2.549500  | H | 6.359110  | -4.043247 | -2.925832 |
| H  | 2.496442  | 10.952765 | 3.526801  | C | 5.431429  | -3.027154 | -4.592532 |
| H  | 2.787931  | 10.946443 | 1.773598  | C | 4.388346  | -2.170646 | -5.004886 |
| C  | 0.781589  | 11.589420 | 2.360063  | H | 4.293425  | -1.859622 | -6.053683 |
| H  | 1.064339  | 12.637758 | 2.598089  | C | 3.450988  | -1.718410 | -4.069871 |
| H  | 0.025259  | 11.305019 | 3.126142  | H | 2.627708  | -1.067836 | -4.401412 |
| C  | 0.146994  | 11.545308 | 0.967349  | C | 6.189125  | -3.495589 | -6.833249 |
| H  | -0.701217 | 12.255936 | 0.894973  | H | 7.169608  | -3.801787 | -7.248484 |
| H  | -0.227706 | 10.534297 | 0.717841  | H | 6.007900  | -2.449453 | -7.168483 |
| H  | 0.884242  | 11.821098 | 0.184731  | C | 5.080481  | -4.430382 | -7.323805 |
| N  | -1.002256 | 1.387978  | 0.859287  | H | 5.122149  | -4.427582 | -8.435990 |
| N  | -1.293314 | -1.446796 | 0.472289  | H | 4.087709  | -4.015366 | -7.050997 |
| N  | 0.234386  | -1.341405 | -1.962308 | C | 5.181366  | -5.867487 | -6.792208 |
| N  | 0.688195  | 1.455784  | -1.464906 | H | 4.334804  | -6.449984 | -7.214124 |
| O  | -4.941380 | -0.374412 | 7.340125  | H | 5.018845  | -5.854680 | -5.692993 |
| O  | -1.019666 | -9.034129 | -1.469106 | C | 6.501610  | -6.574386 | -7.104172 |
| O  | 5.113412  | 0.376637  | -7.833281 | H | 6.476510  | -7.632823 | -6.775896 |
| O  | 1.473918  | 8.780124  | 1.219050  | H | 7.356245  | -6.093710 | -6.585789 |
| Cu | -0.335792 | 0.011865  | -0.518641 | H | 6.720971  | -6.569370 | -8.193173 |
| Br | -2.460607 | 5.209874  | 1.425872  | C | -3.348071 | -1.147213 | -3.091461 |
| Br | -4.237666 | 2.693479  | 3.068911  | C | -3.035380 | -0.799436 | -4.427605 |
| Br | -0.964392 | -4.527780 | -4.300325 | H | -2.031786 | -0.411587 | -4.658222 |
| Br | 0.704978  | -1.988249 | -6.014120 | C | -3.974193 | -0.937456 | -5.447154 |

Conformation 17.

Multiplicity: 2

Charge: 0

E(B97-3c) = -14780.097572059831 Hartree

E(M06/def2-TZVP) = -14775.727575084500 Hartree

E(PBE - D3(BJ)/def2-TZVP) = -14773.098535778976 Hartree

E(PBE0 - D3(BJ)/def2-TZVP) = -14773.635880265881 Hartree

E(PBEh-3c) = -14765.507170753935 Hartree

E(PM6) = 117.13815 Kcal/mol

E(PM7) = 59.28318 Kcal/mol

E( $\omega$ B97X-V/def2-TZVP) = -14776.335895198592 Hartree

E(GFN1-xTB) = -208.697099422761 Hartree

E(GFN2-xTB) = -205.332557611256 Hartree

E(GFN-FF) = -24.583520275293 Hartree

Coordinates:

|   |           |           |           |    |           |           |           |
|---|-----------|-----------|-----------|----|-----------|-----------|-----------|
| C | -1.029405 | 0.768935  | 2.972256  | H  | -8.309155 | -4.936352 | -7.813611 |
| C | -0.669987 | 0.742495  | 4.382054  | H  | -6.679964 | -4.645837 | -7.130975 |
| C | 0.705755  | 0.591574  | 4.444354  | C  | -3.310387 | 1.771733  | 3.251495  |
| C | 1.186573  | 0.520605  | 3.072703  | C  | -3.011539 | 3.015876  | 3.843014  |
| C | 2.536642  | 0.513926  | 2.643388  | H  | -2.015298 | 3.456482  | 3.686723  |
| C | 2.914560  | 0.113798  | 1.342244  | C  | -3.951535 | 3.706400  | 4.617543  |
| C | 4.263475  | 0.199189  | 0.817368  | H  | -3.676769 | 4.676652  | 5.051374  |
| H | 5.107575  | 0.674898  | 1.326467  | C  | -5.230276 | 3.147121  | 4.830580  |
| C | 4.250294  | -0.408757 | -0.413569 | C  | -5.543478 | 1.901636  | 4.241111  |
| H | 5.081181  | -0.531923 | -1.115632 | H  | -6.541027 | 1.477282  | 4.425101  |
| C | 2.892528  | -0.860892 | -0.643144 | C  | -4.601460 | 1.232436  | 3.460949  |
| C | 2.487242  | -1.630296 | -1.755845 | H  | -4.851018 | 0.255288  | 3.021769  |
| C | 1.128789  | -1.931692 | -2.019060 | C  | -6.027917 | 5.007289  | 6.147671  |
| C | 0.616554  | -2.937293 | -2.938431 | H  | -5.030454 | 5.080131  | 6.635593  |
| C | -0.753597 | -2.748401 | -3.018678 | H  | -6.792521 | 5.072781  | 6.948710  |
| C | -1.079227 | -1.630857 | -2.145393 | C  | -6.236156 | 6.129975  | 5.131885  |
| C | -2.333254 | -0.984418 | -2.020528 | H  | -6.062308 | 7.096494  | 5.655397  |
| C | -2.642682 | -0.138567 | -0.932190 | H  | -5.457412 | 6.067394  | 4.341110  |
| C | -3.860277 | 0.639950  | -0.820037 | C  | -7.624795 | 6.122107  | 4.485235  |
| H | -4.616461 | 0.741696  | -1.604769 | H  | -8.397315 | 6.219141  | 5.280535  |
| C | -3.852559 | 1.211921  | 0.428057  | H  | -7.795478 | 5.127451  | 4.021291  |
| H | -4.602062 | 1.875597  | 0.870621  | C  | -7.807985 | 7.224291  | 3.442397  |
| C | -2.628635 | 0.785965  | 1.077563  | H  | -8.818870 | 7.194156  | 2.988636  |
| C | -2.298110 | 1.072045  | 2.421507  | H  | -7.069583 | 7.125228  | 2.619494  |
| C | 3.596309  | 0.997093  | 3.563602  | H  | -7.671190 | 8.232222  | 3.887576  |
| C | 4.701389  | 0.195998  | 3.913550  | N  | 0.104961  | 0.549367  | 2.216640  |
| H | 4.768687  | -0.827063 | 3.514692  | N  | 2.089404  | -0.492314 | 0.416583  |
| C | 5.693866  | 0.658094  | 4.789043  | N  | 0.067951  | -1.218264 | -1.499278 |
| H | 6.528568  | -0.004638 | 5.052244  | N  | -1.887791 | 0.004856  | 0.214591  |
| C | 5.601343  | 1.959619  | 5.326641  | O  | 6.504792  | 2.505514  | 6.181320  |
| C | 4.507457  | 2.780157  | 4.969909  | O  | 6.380771  | -3.546533 | -5.416954 |
| H | 4.457464  | 3.794635  | 5.390866  | O  | -6.105985 | -1.557380 | -6.223619 |
| C | 3.522590  | 2.301376  | 4.109425  | O  | -6.213856 | 3.705674  | 5.586555  |
| H | 2.670248  | 2.944539  | 3.843521  | Cu | 0.094572  | -0.281471 | 0.333179  |
| C | 7.629240  | 1.729320  | 6.591365  | Br | -1.805650 | 0.682185  | 5.875081  |
| H | 8.239925  | 1.448930  | 5.702128  | Br | 1.662994  | 0.310826  | 6.033731  |
| H | 7.280078  | 0.784101  | 7.070524  | Br | 1.525476  | -4.386552 | -3.713764 |
| C | 8.445810  | 2.556773  | 7.571720  | Br | -1.924943 | -3.901236 | -3.925051 |
| H | 8.768443  | 3.491041  | 7.062066  |    |           |           |           |
| H | 9.374972  | 1.991062  | 7.802574  |    |           |           |           |
| C | 7.700854  | 2.899681  | 8.865593  |    |           |           |           |
| H | 6.757658  | 3.422936  | 8.601904  |    |           |           |           |
| H | 7.393721  | 1.955138  | 9.367953  |    |           |           |           |
| C | 8.526718  | 3.754459  | 9.826325  |    |           |           |           |
| H | 7.963838  | 3.989343  | 10.751863 |    |           |           |           |

Conformation 20.

Multiplicity: 2

Charge: 0

E(B97-3c) = -14780.091353752483 Hartree

E(M06/def2-TZVP) = -14775.721276112887 Hartree

E(PBE - D3(BJ)/def2-TZVP) = -14773.092961385832 Hartree

E(PBE0 - D3(BJ)/def2-TZVP) = -14773.629674476910 Hartree H 1.744054 -0.731855 -9.824127  
 E(PBEh-3c) = -14765.499354599709 Hartree H 2.458870 0.480148 -10.926776  
 E(PM6) = 120.46322 Kcal/mol C 0.457785 0.987927 -10.239253  
 E(PM7) = 62.59465 Kcal/mol H -0.044299 0.363290 -11.010211  
 E( $\omega$ B97X-V/def2-TZVP) = -14776.329552213820 Hartree H -0.155325 0.882758 -9.317945  
 E(GFN1-xTB) = -208.694121062031 Hartree C 0.452717 2.455643 -10.692439  
 E(GFN2-xTB) = -205.328599452042 Hartree H -0.577055 2.701201 -11.030842  
 E(GFN-FF) = -24.579821293631 Hartree H 1.096429 2.560918 -11.594839  
 C 0.882907 3.469141 -9.627174  
 H 0.726723 4.508750 -9.979420

Coordinates:

|   |            |           |            |    |           |           |           |
|---|------------|-----------|------------|----|-----------|-----------|-----------|
| C | 2.359114   | 0.733360  | 1.773633   | H  | 1.950704  | 3.354544  | -9.359852 |
| C | 2.536246   | 1.215545  | 3.135302   | H  | 0.297852  | 3.338653  | -8.692493 |
| C | 1.314750   | 1.077448  | 3.773856   | C  | 4.787859  | 0.445595  | 1.231717  |
| C | 0.390958   | 0.510593  | 2.802857   | C  | 5.179636  | -0.523962 | 2.176585  |
| C | -0.925381  | 0.050007  | 3.047678   | H  | 4.420515  | -1.207422 | 2.586042  |
| C | -1.848514  | -0.195317 | 2.006695   | C  | 6.508035  | -0.636615 | 2.605845  |
| C | -3.153475  | -0.797417 | 2.196164   | H  | 6.772090  | -1.408498 | 3.340192  |
| H | -3.522439  | -1.214840 | 3.138321   | C  | 7.483474  | 0.244888  | 2.093317  |
| C | -3.793725  | -0.748899 | 0.982776   | C  | 7.106988  | 1.217064  | 1.139140  |
| H | -4.792785  | -1.119092 | 0.731716   | H  | 7.880864  | 1.897185  | 0.754942  |
| C | -2.881089  | -0.114770 | 0.051791   | C  | 5.783076  | 1.307559  | 0.712530  |
| C | -3.210281  | 0.231451  | -1.277682  | H  | 5.495346  | 2.080843  | -0.014912 |
| C | -2.249946  | 0.731860  | -2.190717  | C  | 9.239216  | -0.699701 | 3.431619  |
| C | -2.511530  | 1.405753  | -3.453649  | H  | 9.057074  | -1.736119 | 3.063512  |
| C | -1.290668  | 1.555846  | -4.091156  | H  | 8.651064  | -1.722248 | 4.371410  |
| C | -0.282914  | 0.972227  | -3.217761  | C  | 10.723045 | -0.484159 | 3.697431  |
| C | 1.083053   | 0.751937  | -3.519772  | H  | 11.078176 | -1.374785 | 4.258755  |
| C | 2.045689   | 0.476858  | -2.524219  | H  | 11.257679 | -0.499585 | 2.722336  |
| C | 3.423518   | 0.119616  | -2.797380  | C  | 11.088837 | 0.782847  | 4.485594  |
| H | 3.838681   | -0.068949 | -3.792575  | H  | 12.158809 | 0.706487  | 4.777052  |
| C | 4.065153   | 0.057304  | -1.585273  | H  | 10.520205 | 0.783440  | 5.442908  |
| H | 5.112088   | -0.193606 | -1.387667  | C  | 10.862701 | 2.106926  | 3.750845  |
| C | 3.079433   | 0.378705  | -0.571765  | H  | 11.217437 | 2.963670  | 4.358960  |
| C | 3.370374   | 0.539397  | 0.801229   | H  | 9.793604  | 2.270758  | 3.515893  |
| C | -1.350246  | -0.247657 | 4.438849   | H  | 11.413460 | 2.127191  | 2.787396  |
| C | -2.472203  | 0.375669  | 5.019852   | N  | 1.034636  | 0.393426  | 1.587401  |
| H | -3.032905  | 1.120820  | 4.436157   | N  | -1.687667 | 0.168864  | 0.685203  |
| C | -2.865636  | 0.097170  | 6.336196   | N  | -0.888258 | 0.560739  | -2.047863 |
| H | -3.733541  | 0.619578  | 6.759272   | N  | 1.849331  | 0.584392  | -1.162650 |
| C | -2.137771  | -0.840004 | 7.099883   | O  | -2.432046 | -1.138855 | 8.380597  |
| C | -1.022024  | -1.487108 | 6.522329   | O  | -8.556663 | -0.636504 | -2.994825 |
| H | -0.473289  | -2.221510 | 7.129275   | O  | 2.608541  | 0.978949  | -8.982326 |
| C | -0.635005  | -1.188342 | 5.218061   | O  | 8.794246  | 0.236881  | 2.450900  |
| H | 0.240177   | -1.690804 | 4.779369   | Cu | 0.077876  | 0.418277  | -0.235148 |
| C | -3.534419  | -0.554755 | 9.031547   | Br | 4.022101  | 2.085880  | 3.881806  |
| H | -4.475975  | -0.770485 | 8.475390   | Br | 0.945913  | 1.733645  | 5.492843  |
| H | -3.390819  | 0.551798  | 9.031429   | Br | -4.117560 | 2.165740  | -4.059117 |
| C | -3.612000  | -1.084040 | 10.455054  | Br | -1.044428 | 2.549266  | -5.666908 |
| H | -3.753603  | -2.186365 | 10.415468  |    |           |           |           |
| H | -4.531935  | -0.668659 | 10.921834  |    |           |           |           |
| C | -2.387020  | -0.746294 | 11.310657  |    |           |           |           |
| H | -1.481118  | -1.133487 | 10.798519  |    |           |           |           |
| H | -2.265096  | 0.359385  | 11.348456  |    |           |           |           |
| C | -2.470959  | -1.308925 | 12.729129  |    |           |           |           |
| H | -1.571977  | -1.052508 | 13.324705  |    |           |           |           |
| H | -2.559581  | -2.415428 | 12.718593  |    |           |           |           |
| H | -3.355346  | -0.913488 | 13.271758  |    |           |           |           |
| C | -4.601806  | 0.000301  | -1.737689  |    |           |           |           |
| C | -5.713155  | 0.589475  | -1.090726  |    |           |           |           |
| H | -5.542307  | 1.261724  | -0.236987  |    |           |           |           |
| C | -7.012552  | 0.364347  | -1.543612  |    |           |           |           |
| H | -7.878313  | 0.837212  | -1.058148  |    |           |           |           |
| C | -7.251083  | -0.477004 | -2.654389  |    |           |           |           |
| C | -6.153131  | -1.090760 | -3.295336  |    |           |           |           |
| H | -6.298257  | -1.775989 | -4.140700  |    |           |           |           |
| C | -4.853165  | -0.841430 | -2.840662  |    |           |           |           |
| H | -4.003792  | -1.321760 | -3.349361  |    |           |           |           |
| C | -8.949237  | -1.341556 | -4.176525  |    |           |           |           |
| H | -8.098873  | -1.433278 | -4.884966  |    |           |           |           |
| H | -9.707778  | -0.693643 | -4.664917  |    |           |           |           |
| C | -9.572792  | -2.704966 | -3.884821  |    |           |           |           |
| H | -10.027456 | -3.040277 | -4.842896  |    |           |           |           |
| H | -10.421590 | -2.557740 | -3.181053  |    |           |           |           |
| C | -8.648855  | -3.813225 | -3.354253  |    |           |           |           |
| H | -7.737473  | -3.869646 | -3.991268  |    |           |           |           |
| H | -9.169300  | -4.783666 | -3.504183  |    |           |           |           |
| C | -8.252662  | -3.696405 | -1.879435  |    |           |           |           |
| H | -7.692419  | -4.594266 | -1.548937  |    |           |           |           |
| H | -9.151327  | -3.607027 | -1.234215  |    |           |           |           |
| H | -7.610846  | -2.817249 | -1.678795  |    |           |           |           |
| C | 1.518604   | 0.760707  | -4.937818  |    |           |           |           |
| C | 0.922888   | -0.116045 | -5.867368  |    |           |           |           |
| H | 0.158154   | -0.826145 | -5.518104  |    |           |           |           |
| C | 1.269797   | -0.092876 | -7.222705  |    |           |           |           |
| H | 0.779155   | -0.790831 | -7.913741  |    |           |           |           |
| C | 2.226982   | 0.835761  | -7.684447  |    |           |           |           |
| C | 2.859908   | 1.692610  | -6.756791  |    |           |           |           |
| H | 3.609962   | 2.403865  | -7.131628  |    |           |           |           |
| C | 2.515732   | 1.647477  | -5.406189  |    |           |           |           |
| H | 2.990441   | 2.343136  | -4.698480  |    |           |           |           |
| C | 1.835952   | 0.361412  | -10.016691 |    |           |           |           |

Conformation 22.

Multiplicity: 2

Charge: 0

E(B97-3c) = -14780.093948277321 Hartree  
 E(M06/def2-TZVP) = -14775.723520496045 Hartree  
 E(PBE - D3(BJ)/def2-TZVP) = -14773.09556752689 Hartree  
 E(PBE0 - D3(BJ)/def2-TZVP) = -14773.632629499658 Hartree  
 E(PBEh-3c) = -14765.502887779823 Hartree  
 E(PM6) = 120.13182 Kcal/mol  
 E(PM7) = 62.90533 Kcal/mol  
 E( $\omega$ B97X-V/def2-TZVP) = -14776.332872161749 Hartree  
 E(GFN1-xTB) = -208.695592316248 Hartree  
 E(GFN2-xTB) = -205.329799481308 Hartree  
 E(GFN-FF) = -24.581525029679 Hartree

Coordinates:

|   |           |           |           |
|---|-----------|-----------|-----------|
| C | -2.818711 | 0.513739  | 0.166278  |
| C | -3.747349 | 1.440949  | 0.795531  |
| C | -2.985126 | 2.431255  | 1.393125  |
| C | -1.590771 | 2.111196  | 1.126792  |
| C | -0.463599 | 2.922350  | 1.402027  |
| C | 0.855760  | 2.417889  | 1.385240  |
| C | 2.044847  | 3.235933  | 1.521139  |
| H | 2.055207  | 4.329954  | 1.552398  |
| C | 3.113566  | 2.376506  | 1.582513  |
| H | 4.175479  | 2.625387  | 1.674952  |
| C | 2.577591  | 1.033022  | 1.485691  |
| C | 3.346816  | -0.143048 | 1.629136  |
| C | 2.810679  | -1.434821 | 1.407757  |
| C | 3.394577  | -2.704343 | 1.814960  |
| C | 2.623643  | -3.703913 | 1.244616  |
| C | 1.570015  | -3.045943 | 0.486146  |
| C | 0.640876  | -3.658462 | -0.388721 |
| C | -0.518286 | -2.996056 | -0.850825 |
| C | -1.417021 | -3.530055 | -1.855521 |
| H | -1.246294 | -4.447133 | -2.428115 |
| C | -2.476661 | -2.661791 | -1.942764 |
| H | -3.348733 | -2.724835 | -2.601273 |
| C | -2.227389 | -1.598987 | -0.989008 |
| C | -3.144789 | -0.568709 | -0.686877 |
| C | -0.650914 | 4.372776  | 1.659887  |
| C | -0.201079 | 4.977794  | 2.849996  |

|   |            |            |           |    |           |           |           |
|---|------------|------------|-----------|----|-----------|-----------|-----------|
| H | 0.280348   | 4.354899   | 3.618467  | N  | 1.208586  | 1.085281  | 1.319567  |
| C | -0.388489  | 6.345742   | 3.092968  | N  | 1.668212  | -1.681731 | 0.674057  |
| H | -0.042788  | 6.775146   | 4.042371  | N  | -1.009365 | -1.799043 | -0.371351 |
| C | -1.025835  | 7.147158   | 2.121974  | O  | -1.257422 | 8.479080  | 2.253772  |
| C | -1.463283  | 6.556667   | 0.914859  | O  | 8.832045  | 0.408958  | 3.003127  |
| H | -1.948286  | 7.198914   | 0.165768  | O  | 1.754284  | -8.845969 | -2.412200 |
| C | -1.283217  | 5.193077   | 0.695033  | O  | -8.270896 | -0.707036 | -3.123930 |
| H | -1.635046  | 4.740256   | -0.244111 | Cu | 0.087205  | -0.369818 | 0.512846  |
| C | -0.856424  | 9.138026   | 3.453693  | Br | -5.605160 | 1.273786  | 1.002927  |
| H | 0.246524   | 9.045928   | 3.585500  | Br | -3.684734 | 3.769796  | 2.506752  |
| H | -1.341622  | 8.650123   | 4.332137  | Br | 4.774309  | -3.013785 | 3.049047  |
| C | -1.271195  | 10.597805  | 3.355432  | Br | 2.837798  | -5.533464 | 1.610992  |
| H | -0.770160  | 11.048968  | 2.471011  |    |           |           |           |
| H | -0.867073  | 11.126879  | 4.246134  |    |           |           |           |
| C | -2.785706  | 10.807293  | 3.259557  |    |           |           |           |
| H | -3.167708  | 10.229011  | 2.392128  |    |           |           |           |
| H | -3.270553  | 10.363727  | 4.157937  |    |           |           |           |
| C | -3.182701  | 12.277318  | 3.127986  |    |           |           |           |
| H | -4.282543  | 12.399230  | 3.063702  |    |           |           |           |
| H | -2.742872  | 12.733337  | 2.216406  |    |           |           |           |
| H | -2.830397  | 12.872894  | 3.996396  |    |           |           |           |
| C | 4.783928   | 0.002240   | 1.972885  |    |           |           |           |
| C | 5.205534   | 0.653271   | 3.155789  |    |           |           |           |
| H | 4.448399   | 1.041195   | 3.853109  |    |           |           |           |
| C | 6.559318   | 0.773541   | 3.467437  |    |           |           |           |
| H | 6.891289   | 1.256520   | 4.397772  |    |           |           |           |
| C | 7.543365   | 0.256879   | 2.594747  |    |           |           |           |
| C | 7.139099   | -0.375879  | 1.399272  |    |           |           |           |
| H | 7.876070   | -0.776104  | 0.690947  |    |           |           |           |
| C | 5.775455   | -0.502628  | 1.107669  |    |           |           |           |
| H | 5.467961   | -1.005325  | 0.178256  |    |           |           |           |
| C | 9.902650   | 0.013642   | 2.141111  |    |           |           |           |
| H | 9.708032   | -1.005137  | 1.737237  |    |           |           |           |
| H | 10.782926  | -0.063199  | 2.812197  |    |           |           |           |
| C | 10.194018  | 1.001636   | 1.009446  |    |           |           |           |
| H | 9.279929   | 1.137432   | 0.391328  |    |           |           |           |
| H | 10.939111  | 0.509570   | 0.346621  |    |           |           |           |
| C | 10.733616  | 2.371540   | 1.447010  |    |           |           |           |
| H | 11.093163  | 2.903285   | 0.539621  |    |           |           |           |
| H | 11.636689  | 2.217157   | 2.079821  |    |           |           |           |
| C | 9.730439   | 3.262155   | 2.186299  |    |           |           |           |
| H | 10.162566  | 4.262023   | 2.393790  |    |           |           |           |
| H | 9.418609   | 2.814019   | 3.149180  |    |           |           |           |
| H | 8.811120   | 3.412910   | 1.582331  |    |           |           |           |
| C | 0.902534   | -5.028572  | -0.899532 |    |           |           |           |
| C | 2.080818   | -5.307988  | -1.632017 |    |           |           |           |
| H | 2.805190   | -4.499227  | -1.811327 |    |           |           |           |
| C | 2.333376   | -6.583917  | -2.131064 |    |           |           |           |
| H | 3.244897   | -6.804600  | -2.704994 |    |           |           |           |
| C | 1.415720   | -7.633582  | -1.899809 |    |           |           |           |
| C | 0.233817   | -7.372516  | -1.174768 |    |           |           |           |
| H | -0.495266  | -8.168278  | -0.973882 |    |           |           |           |
| C | -0.012849  | -6.079252  | -0.692853 |    |           |           |           |
| H | -0.928221  | -5.884736  | -0.114409 |    |           |           |           |
| C | 0.869985   | -9.949380  | -2.220198 |    |           |           |           |
| H | -0.132835  | -9.709718  | -2.647530 |    |           |           |           |
| H | 0.732179   | -10.127606 | -1.128425 |    |           |           |           |
| C | 1.451699   | -11.187335 | -2.889359 |    |           |           |           |
| H | 2.487281   | -11.335515 | -2.511841 |    |           |           |           |
| H | 0.861236   | -12.052740 | -2.519222 |    |           |           |           |
| C | 1.438723   | -11.193081 | -4.425685 |    |           |           |           |
| H | 0.398732   | -11.000298 | -4.773746 |    |           |           |           |
| H | 1.678297   | -12.223935 | -4.765620 |    |           |           |           |
| C | 2.399226   | -10.208456 | -5.098241 |    |           |           |           |
| H | 2.376673   | -10.322771 | -6.201042 |    |           |           |           |
| H | 3.443668   | -10.380328 | -4.764000 |    |           |           |           |
| H | 2.149799   | -9.158141  | -4.854600 |    |           |           |           |
| C | -4.478291  | -0.603759  | -1.338772 |    |           |           |           |
| C | -4.895046  | 0.468320   | -2.153182 |    |           |           |           |
| H | -4.217064  | 1.323003   | -2.297541 |    |           |           |           |
| C | -6.147995  | 0.471723   | -2.779169 |    |           |           |           |
| H | -6.431422  | 1.324441   | -3.409620 |    |           |           |           |
| C | -7.026901  | -0.614981  | -2.585171 |    |           |           |           |
| C | -6.618650  | -1.701741  | -1.779101 |    |           |           |           |
| H | -7.318801  | -2.537747  | -1.637693 |    |           |           |           |
| C | -5.362348  | -1.696531  | -1.175038 |    |           |           |           |
| H | -5.062405  | -2.537189  | -0.532104 |    |           |           |           |
| C | -8.758734  | 0.366305   | -3.928387 |    |           |           |           |
| H | -8.101353  | 0.487953   | -4.820594 |    |           |           |           |
| H | -8.718053  | 1.321071   | -3.352095 |    |           |           |           |
| C | -10.188139 | 0.065085   | -4.358201 |    |           |           |           |
| H | -10.434793 | 0.786855   | -5.166130 |    |           |           |           |
| H | -10.207895 | -0.943070  | -4.827458 |    |           |           |           |
| C | -11.255827 | 0.161946   | -3.257556 |    |           |           |           |
| H | -12.253969 | 0.124414   | -3.745294 |    |           |           |           |
| H | -11.192347 | 1.169653   | -2.788229 |    |           |           |           |
| C | -11.186582 | -0.916814  | -2.173040 |    |           |           |           |
| H | -12.029652 | -0.817161  | -1.459591 |    |           |           |           |
| H | -10.241345 | -0.863634  | -1.599947 |    |           |           |           |
| H | -11.240521 | -1.932524  | -2.617467 |    |           |           |           |
| N | -1.528005  | 0.906504   | 0.455631  |    |           |           |           |

Conformation 29.  
Multiplicity: 2  
Charge: 0  
E(B97-3c) = -14780.093552819184 Hartree  
E(M06/def2-TZVP) = -14775.722412020570 Hartree  
E(PBE - D3(BJ)/def2-TZVP) = -14773.094680285094 Hartree  
E(PBE0 - D3(BJ)/def2-TZVP) = -14773.631566514114 Hartree  
E(PBEh-3c) = -14765.501629592944 Hartree  
E(PM6) = 115.56808 Kcal/mol  
E(PM7) = 58.46810 Kcal/mol  
E( $\omega$ B97X-V/def2-TZVP) = -14776.331145231081 Hartree  
E(GFN1-xTB) = -208.696403560423 Hartree  
E(GFN2-xTB) = -205.332114814830 Hartree  
E(GFN-FF) = -24.581590397895 Hartree

Coordinates:

|   |            |           |           |
|---|------------|-----------|-----------|
| C | 2.194569   | 1.058225  | -1.465942 |
| C | 2.571554   | 2.042119  | -2.469382 |
| C | 1.560997   | 2.988848  | -2.505240 |
| C | 0.567520   | 2.585448  | -1.521455 |
| C | -0.557107  | 3.331114  | -1.092877 |
| C | -1.617358  | 2.751198  | -0.361138 |
| C | -2.713049  | 3.500239  | 0.222765  |
| H | -2.789536  | 4.591991  | 0.239112  |
| C | -3.588360  | 2.581393  | 0.746385  |
| H | -4.527330  | 2.767276  | 1.277498  |
| C | -3.029732  | 1.271021  | 0.478746  |
| C | -3.689598  | 0.053668  | 0.752740  |
| C | -3.068697  | -1.206138 | 0.570385  |
| C | -3.727388  | -2.510849 | 0.497552  |
| C | -2.728197  | -3.461429 | 0.486137  |
| C | -1.459610  | -2.752337 | 0.558149  |
| C | -0.175687  | -3.319527 | 0.743596  |
| C | 1.013638   | -2.592309 | 0.512882  |
| C | 2.341941   | -3.075467 | 0.834671  |
| H | 2.559909   | -4.004066 | 1.371546  |
| C | 3.230310   | -2.143831 | 0.357709  |
| H | 4.322736   | -2.156956 | 0.424936  |
| C | 2.445081   | -1.093393 | -0.260031 |
| C | 2.991108   | -0.006927 | -0.979266 |
| C | -0.611163  | 4.791956  | -1.354419 |
| C | -1.675518  | 5.378420  | -2.067058 |
| H | -2.473974  | 4.733793  | -2.463739 |
| C | -1.719803  | 6.757529  | -2.315194 |
| H | -2.556361  | 7.172513  | -2.892400 |
| C | -0.688073  | 7.588730  | -1.829499 |
| C | 0.375136   | 7.015815  | -1.095782 |
| H | 1.164579   | 7.680398  | -0.716294 |
| C | 0.412221   | 5.641687  | -0.870563 |
| H | 1.248417   | 5.203711  | -0.305007 |
| C | -1.664839  | 9.576322  | -2.756963 |
| H | -2.648529  | 9.416489  | -2.257821 |
| H | -1.728956  | 9.127234  | -3.776449 |
| C | -1.335465  | 11.058377 | -2.845802 |
| H | -1.279246  | 11.471229 | -1.814693 |
| H | -2.192307  | 11.567699 | -3.338810 |
| C | -0.036446  | 11.360802 | -3.599379 |
| H | 0.791434   | 10.803360 | -3.112844 |
| H | -0.112574  | 10.951220 | -4.631543 |
| C | 0.294064   | 12.851868 | -3.654581 |
| H | 1.238051   | 13.041277 | -4.203811 |
| H | 0.410018   | 13.276483 | -2.635468 |
| H | -0.508667  | 13.428104 | -4.161147 |
| C | -5.067861  | 0.104278  | 1.300352  |
| C | -6.128821  | 0.707625  | 0.595455  |
| H | -5.930693  | 1.156416  | -0.389282 |
| C | -7.437318  | 0.697500  | 1.093876  |
| H | -8.239507  | 1.144885  | 0.492881  |
| C | -7.711144  | 0.091800  | 2.338872  |
| C | -6.646990  | -0.475661 | 3.075074  |
| H | -6.875282  | -0.929261 | 4.050207  |
| C | -5.353274  | -0.477350 | 2.557565  |
| H | -4.537271  | -0.944547 | 3.129183  |
| C | -10.133359 | 0.284968  | 2.193256  |
| H | -9.972069  | 1.080293  | 1.433738  |
| H | -10.840783 | 0.693526  | 2.943226  |
| C | -10.720061 | -0.976740 | 1.562565  |
| H | -11.725052 | -0.712867 | 1.162008  |

|    |            |            |           |   |           |            |            |
|----|------------|------------|-----------|---|-----------|------------|------------|
| H  | -10.898261 | -1.717264  | 2.373240  | H | -2.065066 | -4.582666  | -0.270564  |
| C  | -9.878271  | -1.623912  | 0.456805  | C | -1.588636 | -3.214474  | -1.955255  |
| H  | -8.873186  | -1.876538  | 0.856354  | H | -1.617707 | -3.840452  | -2.852707  |
| H  | -9.698523  | -0.883230  | -0.353433 | C | -1.278530 | -1.798648  | -1.936703  |
| C  | -10.527936 | -2.879869  | -0.124761 | C | -1.100604 | -1.007035  | -3.092911  |
| H  | -9.899689  | -3.332776  | -0.917644 | C | -0.682026 | 0.344157   | -3.031340  |
| H  | -11.520353 | -2.656073  | -0.569637 | C | -0.765471 | 1.334368   | -4.094772  |
| H  | -10.684768 | -3.651104  | 0.658147  | C | -0.087899 | 2.458649   | -3.652576  |
| C  | -0.053929  | -4.704807  | 1.263017  | C | 0.413558  | 2.154346   | -2.320563  |
| C  | 0.655587   | -5.699789  | 0.561057  | C | 1.301421  | 2.939274   | -1.545840  |
| H  | 1.106526   | -5.450376  | -0.410939 | C | 1.498313  | 2.720646   | -0.164180  |
| C  | 0.770210   | -7.005904  | 1.055605  | C | 2.496991  | 3.400935   | 0.636426   |
| H  | 1.317971   | -7.753561  | 0.466653  | H | 3.260971  | 4.080532   | 0.245624   |
| C  | 0.176569   | -7.342910  | 2.291372  | C | 2.297449  | 3.009773   | 1.937131   |
| C  | -0.522443  | -6.349034  | 3.012866  | H | 2.865079  | 3.304279   | 2.825367   |
| H  | -0.970841  | -6.626722  | 3.977532  | C | 1.173720  | 2.093748   | 1.932180   |
| C  | -0.639091  | -5.058083  | 2.502142  | C | 0.573589  | 1.561079   | 3.094719   |
| H  | -1.192090  | -4.294745  | 3.069897  | C | -2.466294 | -3.549153  | 2.201476   |
| C  | 0.947146   | -9.626220  | 2.240571  | C | -3.697059 | -4.099998  | 1.793062   |
| H  | 0.741261   | -9.655259  | 1.145992  | H | -4.261786 | -3.608602  | 0.986944   |
| H  | 0.532393   | -10.560641 | 2.671089  | C | -4.234988 | -5.234999  | 2.415631   |
| C  | 2.446783   | -9.540972  | 2.517979  | H | -5.206861 | -5.621401  | 2.081759   |
| H  | 2.840616   | -8.570344  | 2.146235  | C | -3.527422 | -5.856953  | 3.466308   |
| H  | 2.598585   | -9.532472  | 3.619011  | C | -2.281943 | -5.326529  | 3.872088   |
| C  | 3.230323   | -10.694109 | 1.883979  | H | -1.740152 | -5.830822  | 4.685094   |
| H  | 3.065041   | -10.689362 | 0.783266  | C | -1.767897 | -4.189685  | 3.253031   |
| H  | 2.816182   | -11.662557 | 2.243662  | H | -0.801332 | -3.778912  | 3.581414   |
| C  | 4.729796   | -10.635020 | 2.177320  | C | -7.521048 | -7.538923  | 3.790486   |
| H  | 5.273031   | -11.477580 | 1.704540  | H | -5.191336 | -7.874132  | 2.727656   |
| H  | 4.928251   | -10.677634 | 3.268405  | H | -6.019283 | -6.776298  | 3.887387   |
| H  | 5.176917   | -9.692554  | 1.798227  | C | -5.466039 | -8.710256  | 4.726143   |
| C  | 4.462405   | 0.036450   | -1.170458 | H | -4.639446 | -9.444711  | 4.607253   |
| C  | 5.206582   | 1.132860   | -0.688998 | H | -6.391101 | -9.223656  | 4.383772   |
| H  | 4.678905   | 1.954306   | -0.181258 | C | -5.598266 | -8.308407  | 6.198427   |
| C  | 6.597603   | 1.197608   | -0.833324 | H | -4.684022 | -7.752873  | 6.495716   |
| H  | 7.136078   | 2.066639   | -0.433466 | H | -6.439416 | -7.586960  | 6.303003   |
| C  | 7.283080   | 0.151710   | -1.488385 | C | -5.816048 | -9.499239  | 7.131021   |
| C  | 6.549203   | -0.952929  | -1.976336 | H | -5.908956 | -9.178761  | 8.188044   |
| H  | 7.097319   | -1.753580  | -2.493577 | H | -4.970315 | -10.216055 | 7.073295   |
| C  | 5.165524   | -1.009515  | -1.812903 | H | -6.738921 | -10.058518 | 6.869111   |
| H  | 4.603182   | -1.866020  | -2.213029 | C | -1.311160 | -1.646025  | -4.416660  |
| C  | 9.467184   | 1.122659   | -1.145555 | C | -0.261251 | -1.692817  | -5.355584  |
| H  | 9.045849   | 2.130891   | -1.357898 | H | 0.711055  | -1.250004  | -5.091739  |
| H  | 10.415875  | 1.038712   | -1.714769 | C | -0.426235 | -2.287323  | -6.613042  |
| C  | 9.738787   | 0.949923   | 0.350277  | H | 0.418622  | -2.307045  | -7.313621  |
| H  | 10.281958  | 1.862930   | 0.678876  | C | -1.674207 | -2.845650  | -6.962382  |
| H  | 8.775138   | 0.954321   | 0.904681  | C | -2.734056 | -2.811670  | -6.028405  |
| C  | 10.555378  | -0.291738  | 0.738341  | H | -3.700673 | -3.246262  | -6.321485  |
| H  | 10.858119  | -0.180297  | 1.802292  | C | -2.549563 | -2.229018  | -4.775459  |
| H  | 11.505406  | -0.294556  | 0.157511  | H | -3.386820 | -2.190178  | -4.063056  |
| C  | 9.833826   | -1.630317  | 0.556233  | C | -0.924228 | -3.502735  | -9.146603  |
| H  | 10.452225  | -2.470964  | 0.930961  | H | -0.044313 | -4.050789  | -8.736605  |
| H  | 9.595576   | -1.824414  | -0.507178 | H | -0.579857 | -2.477369  | -9.414621  |
| H  | 8.874121   | -1.645260  | 1.114352  | C | -1.492638 | -4.213469  | -10.367486 |
| N  | 0.944542   | 1.375036   | -0.974657 | H | -0.692860 | -4.236706  | -11.140076 |
| N  | -1.810432  | 1.400601   | -0.155092 | H | -2.313399 | -3.591344  | -10.783179 |
| N  | -1.702945  | -1.393859  | 0.523261  | C | -2.010578 | -5.633678  | -10.097159 |
| N  | 1.099859   | -1.364538  | -0.111299 | H | -2.472690 | -6.019717  | -11.030600 |
| O  | -0.632705  | 8.933834   | -2.011162 | H | -2.830319 | -5.571670  | -9.350655  |
| O  | -8.936251  | 0.013273   | 2.925984  | C | -0.944304 | -6.616344  | -9.609107  |
| O  | 0.205882   | -8.577514  | 2.861861  | H | -1.363806 | -7.634968  | -9.486334  |
| O  | 8.624925   | 0.113444   | -1.709441 | H | -0.525710 | -6.319279  | -8.625475  |
| Cu | -0.365691  | 0.006870   | -0.173384 | H | -6.097313 | -6.689252  | -10.323977 |
| Br | 4.004753   | 1.984888   | -3.679851 | C | 2.111407  | 3.993395   | -2.207443  |
| Br | 1.460276   | 4.373838   | -3.767716 | C | 2.057261  | 5.345158   | -1.792587  |
| Br | -5.547937  | -2.877744  | 0.228046  | H | 1.381626  | 5.627055   | -0.971537  |
| Br | -3.027637  | -5.291639  | 0.199322  | C | 2.813266  | 6.325294   | -2.433887  |
|    |            |            |           | H | 2.758397  | 7.380931   | -2.131053  |
|    |            |            |           | C | 3.665953  | 5.980052   | -3.506563  |
|    |            |            |           | C | 3.749667  | 4.632651   | -3.917581  |
|    |            |            |           | H | 4.412832  | 4.331521   | -4.738878  |
|    |            |            |           | C | 2.972484  | 3.662226   | -3.272634  |
|    |            |            |           | H | 3.033649  | 2.614515   | -3.603690  |
|    |            |            |           | H | 5.216046  | 6.729021   | -5.179533  |
|    |            |            |           | C | 4.632666  | 6.240123   | -5.995341  |
|    |            |            |           | H | 6.019372  | 6.020789   | -4.870788  |
|    |            |            |           | C | 5.807179  | 8.045456   | -5.659321  |
|    |            |            |           | H | 6.371588  | 8.506737   | -4.819445  |
|    |            |            |           | H | 6.556019  | 7.814449   | -6.448233  |
|    |            |            |           | C | 4.766112  | 9.034474   | -6.192926  |
|    |            |            |           | H | 4.007641  | 9.210563   | -5.401271  |
|    |            |            |           | H | 4.218065  | 8.562215   | -7.038775  |
|    |            |            |           | C | 5.372786  | 10.362669  | -6.644084  |
|    |            |            |           | H | 4.597152  | 11.058982  | -7.021183  |
|    |            |            |           | H | 6.114103  | 10.216225  | -7.457739  |
|    |            |            |           | H | 5.898257  | 10.869961  | -5.808091  |
|    |            |            |           | C | 1.080634  | 2.138002   | 4.414497   |
|    |            |            |           | C | 1.607866  | 1.074454   | 5.333130   |
|    |            |            |           | H | 1.631845  | 0.010109   | 5.054942   |
|    |            |            |           | C | 2.095543  | 1.475437   | 6.574401   |
|    |            |            |           | H | 2.513212  | 0.750314   | 7.287569   |

Conformation 32.  
Multiplicity: 2  
Charge: 0  
E(B97-3c) = -14780.098371216211 Hartree  
E(M06/def2-TZVP) = -14775.728183140178 Hartree  
E(PBE - D3(BJ)/def2-TZVP) = -14773.099714960432 Hartree  
E(PBE0 - D3(BJ)/def2-TZVP) = -14773.637249647230 Hartree  
E(PBEh-3c) = -14765.507380490557 Hartree  
E(PM6) = 120.04579 Kcal/mol  
E(PM7) = 62.51227 Kcal/mol  
E( $\omega$ B97X-V/def2-TZVP) = -14776.337313630278 Hartree  
E(GFN1-xTB) = -208.695118121392 Hartree  
E(GFN2-xTB) = -205.330908527077 Hartree  
E(GFN-FF) = -24.581469969634 Hartree

Coordinates:  
C -0.445202 0.578585 3.041472  
C -1.344836 0.193517 4.118420  
C -2.051787 -0.913082 3.676807  
C -1.581086 -1.206746 2.331692  
C -1.897542 -2.343089 1.548287  
C -1.640932 -2.401632 0.160212  
C -1.814537 -3.588553 -0.653855

|    |           |           |           |   |           |            |            |
|----|-----------|-----------|-----------|---|-----------|------------|------------|
| C  | 2.059938  | 2.838309  | 6.946705  | C | -0.636929 | -9.340382  | -9.301269  |
| C  | 1.540995  | 3.789584  | 6.042933  | H | -1.327916 | -9.031781  | -10.111121 |
| H  | 1.492641  | 4.854055  | 6.306990  | H | -1.177143 | -10.068876 | -8.661122  |
| C  | 1.067672  | 3.371363  | 4.791211  | H | 0.210332  | -9.881760  | -9.772427  |
| H  | 0.645684  | 4.114661  | 4.098638  | C | 4.385609  | -1.404111  | 1.982482   |
| C  | 2.530436  | 4.486283  | 8.629487  | C | 5.507521  | -1.925427  | 1.308343   |
| H  | 1.487276  | 4.882594  | 8.608336  | H | 5.552345  | -1.856042  | 0.211320   |
| H  | 3.137723  | 5.111808  | 7.934659  | C | 6.582854  | -2.494439  | 2.005062   |
| C  | 3.098808  | 4.555920  | 10.040519 | H | 7.447880  | -2.870272  | 1.443374   |
| H  | 4.089491  | 4.050446  | 10.041906 | C | 6.542439  | -2.566467  | 3.413621   |
| H  | 3.298830  | 5.628548  | 10.250071 | C | 5.415504  | -2.062518  | 4.101673   |
| C  | 2.208276  | 3.985481  | 11.154906 | H | 5.398890  | -2.134056  | 5.198707   |
| H  | 1.216432  | 4.489811  | 11.111752 | C | 4.361876  | -1.486859  | 3.395492   |
| H  | 2.649265  | 4.284179  | 12.130600 | H | 3.491336  | -1.090978  | 3.939759   |
| C  | 2.016209  | 2.466642  | 11.135442 | C | 8.686784  | -3.636611  | 3.556741   |
| H  | 1.421997  | 2.130501  | 12.009239 | H | 9.195826  | -2.834861  | 2.972820   |
| H  | 2.993402  | 1.941471  | 11.170775 | H | 8.390595  | -4.435830  | 2.836235   |
| H  | 1.500128  | 2.128316  | 10.216699 | C | 9.625642  | -4.196884  | 4.616375   |
| N  | -0.673705 | -0.237830 | 1.952833  | H | 9.821308  | -3.401003  | 5.368207   |
| N  | -1.270145 | -1.337256 | -0.635950 | H | 10.595644 | -4.386980  | 4.108893   |
| N  | -0.034541 | 0.902982  | -1.948362 | C | 9.163683  | -5.485886  | 5.313177   |
| N  | 0.735254  | 1.897188  | 0.638176  | H | 10.027953 | -5.898147  | 5.877660   |
| O  | -3.955048 | -6.957498 | 4.137530  | H | 8.927946  | -6.246654  | 4.534954   |
| O  | -1.949439 | -3.429336 | -8.157703 | C | 7.972367  | -5.332997  | 6.262783   |
| O  | 4.359544  | 7.002080  | -4.071848 | H | 7.744506  | -6.229129  | 6.771164   |
| O  | 2.543800  | 3.131351  | 8.181970  | H | 7.061634  | -4.999458  | 5.729790   |
| Cu | -0.303969 | 0.302555  | 0.001652  | H | 8.183952  | -4.578419  | 7.048908   |
| Br | -1.702900 | 1.099403  | 5.722250  | C | 0.125260  | 3.980799   | 3.112257   |
| Br | -3.486735 | -1.685179 | 4.607027  | C | 0.315807  | 3.602076   | 4.456588   |
| Br | -1.766810 | 1.264511  | -5.680514 | H | 0.573600  | 2.556815   | 4.684530   |
| Br | -0.066702 | 4.100124  | -4.561774 | C | 0.185666  | 4.521882   | 5.504617   |

Conformation 6.

Multiplicity: 2

Charge: 0

E(B97-3c) = -14780.096269367965 Hartree

E(M06/def2-TZVP) = -14775.725834511941 Hartree

E(PBE - D3(BJ)/def2-TZVP) = -14773.097758140699 Hartree

E(PBE0 - D3(BJ)/def2-TZVP) = -14773.634955911630 Hartree

E(PBEh-3c) = -14765.505086378176 Hartree

E(PM6) = 121.47409 Kcal/mol

E(PM7) = 64.17224 Kcal/mol

E( $\omega$ B97X-V/def2-TZVP) = -14776.334985168956 Hartree

E(GFN1-xTB) = -208.694535215524 Hartree

E(GFN2-xTB) = -205.329151590731 Hartree

E(GFN-FF) = -24.580649502302 Hartree

Coordinates:

|   |           |           |           |    |            |           |           |
|---|-----------|-----------|-----------|----|------------|-----------|-----------|
| C | -1.662008 | 0.684668  | -2.522059 | H  | -2.784500  | 7.150136  | 9.668783  |
| C | -1.782150 | 0.321324  | -3.926048 | H  | -2.948876  | 6.548995  | 7.990337  |
| C | -0.951901 | -0.768176 | -4.132726 | C  | -3.743242  | 2.072672  | -2.384854 |
| C | -0.322142 | -1.069150 | -2.855944 | C  | -4.741708  | 1.125967  | -2.689913 |
| C | 0.487802  | -2.189858 | -2.549108 | H  | -4.542102  | 0.060354  | -2.501109 |
| C | 1.311791  | -2.236329 | -1.402325 | C  | -5.978051  | 1.508906  | -3.225337 |
| C | 2.061084  | -3.402581 | -0.977781 | H  | -6.730810  | 0.740166  | -3.442565 |
| H | 1.988372  | -4.396333 | -1.430712 | C  | -6.234805  | 2.872698  | -3.480644 |
| C | 2.838383  | -3.010660 | 0.083883  | C  | -5.245825  | 3.834180  | -3.172689 |
| H | 3.530475  | -3.618532 | 0.675140  | H  | -5.462275  | 4.890991  | -3.385687 |
| C | 2.561665  | -1.605810 | 0.310648  | C  | -4.025862  | 3.438099  | -2.626820 |
| C | 3.246025  | -0.799387 | 1.247500  | H  | -3.254814  | 4.191815  | -2.409137 |
| C | 2.846363  | 0.526237  | 1.543928  | C  | -8.422270  | 2.437228  | -4.369917 |
| C | 3.619816  | 1.537083  | 2.249188  | H  | -8.742786  | 1.857799  | -3.471370 |
| C | 2.771575  | 2.608622  | 2.475434  | H  | -8.027410  | 1.706259  | -5.113175 |
| C | 1.480388  | 2.254216  | 1.905398  | C  | -9.598463  | 3.205604  | -4.957075 |
| C | 0.268554  | 2.977194  | 2.028039  | H  | -9.218192  | 3.848603  | -5.781016 |
| C | -0.841422 | 2.742808  | 1.186208  | H  | -10.262028 | 2.452637  | -5.433700 |
| C | -2.138865 | 3.369157  | 1.347919  | C  | -10.422323 | 4.042119  | -3.966513 |
| H | -2.430315 | 4.005812  | 2.189221  | H  | -10.766203 | 3.380120  | -3.139752 |
| C | -2.898039 | 2.995202  | 0.266922  | H  | -11.348201 | 4.371205  | -4.486168 |
| H | -3.935760 | 3.264074  | 0.045499  | C  | -9.712509  | 5.267621  | -3.384350 |
| C | -2.065711 | 2.137844  | -0.553907 | H  | -10.397995 | 5.853045  | -2.738485 |
| C | -2.444187 | 1.631827  | -1.817421 | H  | -9.353453  | 5.940723  | -4.190587 |
| C | 0.438023  | -3.388470 | -3.423296 | H  | -8.828572  | 4.984343  | -2.781537 |
| C | 1.596893  | -3.918125 | -4.024837 | N  | -0.712512  | -0.123430 | -1.930022 |
| H | 2.561231  | -3.413916 | -3.863514 | N  | 1.596338   | -1.169744 | -0.573796 |
| C | 1.542062  | -5.047062 | -4.854086 | N  | 1.586896   | 1.027379  | 1.282986  |
| H | 2.464709  | -5.416703 | -5.320190 | N  | -0.836521  | 1.962124  | 0.048131  |
| C | 0.304463  | -5.683983 | -5.086578 | O  | 0.138143   | -6.781010 | -5.870231 |
| C | -0.863002 | -5.173662 | -4.475207 | O  | 7.525064   | -3.098757 | 4.187077  |
| H | -1.816315 | -5.689322 | -4.659977 | O  | -0.270047  | 6.842226  | 6.151904  |
| C | -0.793888 | -4.043065 | -3.664702 | O  | -7.388768  | 3.354217  | -4.012507 |
| H | -1.709185 | -3.648463 | -3.198524 | Cu | 0.404257   | 0.420273  | -0.289044 |
| C | 1.275111  | -7.350037 | -6.517077 | Br | -2.677865  | 1.238429  | -5.296803 |
| H | 2.020415  | -7.674028 | -5.754352 | Br | -0.587671  | -1.510278 | -5.817484 |
| H | 1.766039  | -6.582782 | -7.161636 | Br | 5.461044   | 1.556949  | 2.611255  |
| C | 0.805137  | -8.528811 | -7.354973 | Br | 3.322777   | 4.257674  | 3.181745  |
| H | 0.316474  | -9.268384 | -6.683476 |    |            |           |           |
| H | 1.706019  | -9.031692 | -7.769889 |    |            |           |           |
| C | -0.151312 | -8.141418 | -8.487327 |    |            |           |           |
| H | -1.016534 | -7.600924 | -8.049070 |    |            |           |           |
| H | 0.356609  | -7.410668 | -9.155778 |    |            |           |           |

Conformation 7.

Multiplicity: 2

Charge: 0

E(B97-3c) = -14780.094628627106 Hartree

E(M06/def2-TZVP) = -14775.723670097575 Hartree  
E(PBE - D3(BJ)/def2-TZVP) = -14773.095860625714 Hartree  
E(PBE0 - D3(BJ)/def2-TZVP) = -14773.633005561653 Hartree  
E(PBEh-3c) = -14765.503314129095 Hartree  
E(PM6) = 116.39312 Kcal/mol  
E(PM7) = 59.57135 Kcal/mol  
E( $\omega$ B97X-V/def2-TZVP) = -14776.332625259862 Hartree  
E(GFN1-xTB) = -208.695566177722 Hartree  
E(GFN2-xTB) = -205.332201832048 Hartree  
E(GFN-FF) = -24.581029655396 Hartree

Coordinates:

|   |           |           |           |                                                             |            |            |           |
|---|-----------|-----------|-----------|-------------------------------------------------------------|------------|------------|-----------|
| C | 1.157856  | -1.896711 | -1.785289 | H                                                           | -3.044196  | -0.687522  | 4.662384  |
| C | 1.830735  | -1.862423 | -3.075233 | H                                                           | -7.739585  | -4.074244  | 5.036579  |
| C | 2.444267  | -0.624691 | -3.176948 | C                                                           | -8.121930  | -4.565332  | 5.954951  |
| C | 2.144159  | 0.098794  | -1.950537 | H                                                           | -7.350868  | -4.880355  | 4.375469  |
| C | 2.684027  | 1.343076  | -1.543414 | H                                                           | -8.859335  | -3.278220  | 4.364925  |
| C | 2.109609  | 2.116906  | -0.510696 | H                                                           | -9.210577  | -2.512765  | 5.088275  |
| C | 2.694011  | 3.331862  | 0.022953  | H                                                           | -8.445729  | -2.718058  | 3.498320  |
| H | 3.681465  | 3.723252  | -0.240947 | C                                                           | -10.036101 | -4.148618  | 3.902417  |
| C | 1.784209  | 3.855078  | 0.907738  | H                                                           | -10.867109 | -3.478499  | 3.596589  |
| H | 1.875360  | 4.761430  | 1.514659  | H                                                           | -10.426804 | -4.731072  | 4.766950  |
| C | 0.645089  | 2.958544  | 0.917267  | C                                                           | -9.705306  | -5.098391  | 2.746616  |
| C | -0.553852 | 3.203408  | 1.622323  | H                                                           | -10.602825 | -5.656771  | 2.412960  |
| C | -1.590887 | 2.243936  | 1.715973  | H                                                           | -8.940295  | -5.851570  | 3.026360  |
| C | -2.963371 | 2.478442  | 2.138962  | H                                                           | -9.315621  | -4.539985  | 1.869481  |
| C | -3.569034 | 1.237433  | 2.248379  | C                                                           | 0.856819   | -4.381491  | -1.663040 |
| C | -2.566385 | 0.244020  | 1.893724  | C                                                           | 2.196369   | -4.839381  | -1.670728 |
| C | -2.682741 | -1.162494 | 2.010352  | H                                                           | 2.992748   | -4.168862  | -1.314378 |
| C | -1.798876 | -2.052390 | 1.360220  | C                                                           | 2.518676   | -6.118139  | -2.118865 |
| C | -1.798633 | -3.489373 | 1.551267  | H                                                           | 3.557281   | -6.478893  | -2.123801 |
| H | -2.405204 | -4.025478 | 2.287960  | C                                                           | 1.505504   | -6.983310  | -2.590185 |
| C | -0.896761 | -4.009026 | 0.656065  | C                                                           | 0.163577   | -6.547016  | -2.582602 |
| C | -0.615665 | -5.056895 | 0.511290  | H                                                           | -0.644390  | -7.195306  | -2.945934 |
| C | -0.345147 | -2.889598 | -0.081655 | C                                                           | -0.145747  | -5.261970  | -2.115117 |
| C | 0.536064  | -3.014938 | -1.178819 | H                                                           | -1.191149  | -4.919653  | -2.130282 |
| C | 3.935794  | 1.835488  | -2.172071 | C                                                           | 0.947227   | -9.126738  | -3.516865 |
| C | 4.006532  | 3.090734  | -2.807911 | H                                                           | 0.404711   | -8.670847  | -4.377466 |
| H | 3.101518  | 3.713611  | -2.865926 | H                                                           | 0.192016   | -9.341570  | -2.723508 |
| C | 5.191998  | 3.545815  | -3.402052 | C                                                           | 1.643681   | -10.499741 | -3.952756 |
| H | 5.200510  | 4.521304  | -3.905657 | H                                                           | 0.898025   | -10.989968 | -4.536705 |
| C | 6.351115  | 2.742344  | -3.354693 | H                                                           | 2.453454   | -10.140455 | -4.666282 |
| C | 6.298543  | 1.488590  | -2.704888 | C                                                           | 2.198118   | -11.294446 | -2.826689 |
| H | 7.213904  | 0.880560  | -2.669147 | H                                                           | 2.474389   | -12.276046 | -3.269172 |
| C | 5.109421  | 1.044793  | -2.131343 | H                                                           | 1.376537   | -11.514432 | -2.107902 |
| H | 5.076509  | 0.063918  | -1.633706 | C                                                           | 3.404657   | -10.727510 | -2.073586 |
| C | 7.674248  | 4.336936  | -4.567960 | H                                                           | 3.782197   | -11.453253 | -1.324900 |
| H | 7.448516  | 5.170370  | -3.863047 | H                                                           | 3.156248   | -9.786187  | -1.547195 |
| H | 6.935095  | 4.393563  | -5.402062 | H                                                           | 4.238007   | -10.499741 | -2.770480 |
| C | 9.093274  | 4.448896  | -5.103516 | N                                                           | 1.300916   | -0.668090  | -1.172775 |
| H | 9.800564  | 4.386432  | -4.247628 | N                                                           | 0.884545   | 1.886373   | 0.081866  |
| H | 9.214248  | 5.467038  | -5.534141 | N                                                           | -1.413111  | 0.892457   | 1.501172  |
| C | 9.446952  | 3.387622  | -6.150197 | O                                                           | -0.873402  | -1.707505  | 0.396157  |
| H | 9.269009  | 2.384190  | -5.709461 | O                                                           | 7.549218   | 3.085931   | -3.894710 |
| H | 8.740637  | 3.473472  | -7.006115 | O                                                           | -1.141975  | 8.065969   | 4.500438  |
| C | 10.886713 | 3.494313  | -6.651710 | O                                                           | -6.668258  | -3.243688  | 5.482957  |
| H | 11.115752 | 2.715244  | -7.406172 | O                                                           | 1.917388   | -8.203320  | -3.024896 |
| H | 11.612230 | 3.376631  | -5.819796 | Cu                                                          | -0.020900  | 0.098997   | 0.207915  |
| H | 11.081845 | 4.481663  | -7.120823 | Br                                                          | 1.741337   | -3.110327  | -4.474067 |
| C | -0.692299 | 4.497245  | 2.337359  | Br                                                          | 3.290800   | 0.006797   | -4.728301 |
| C | -0.891728 | 4.518492  | 3.738058  | Br                                                          | -3.874081  | 4.111608   | 2.302181  |
| H | -0.936981 | 3.565344  | 4.286014  | Br                                                          | -5.400617  | 0.985946   | 2.572868  |
| C | -1.031396 | 5.720514  | 4.428485  | Conformation 9.                                             |            |            |           |
| H | -1.181370 | 5.742523  | 5.517390  | Multiplicity: 2                                             |            |            |           |
| C | -0.991286 | 6.951020  | 3.735272  | Charge: 0                                                   |            |            |           |
| C | -0.785778 | 6.947557  | 2.338386  | E(B97-3c) = -14780.095863964851 Hartree                     |            |            |           |
| H | -0.756700 | 7.885318  | 1.767727  | E(M06/def2-TZVP) = -14775.724808253648 Hartree              |            |            |           |
| C | -0.628059 | 5.731374  | 1.660424  | E(PBE - D3(BJ)/def2-TZVP) = -14773.097230574409 Hartree     |            |            |           |
| H | -0.488520 | 5.736864  | 0.569172  | E(PBE0 - D3(BJ)/def2-TZVP) = -14773.634404943105 Hartree    |            |            |           |
| C | -1.244176 | 9.343512  | 3.874038  | E(PBEh-3c) = -14765.504541605114 Hartree                    |            |            |           |
| H | -0.443388 | 9.471469  | 3.109784  | E(PM6) = 119.33705 Kcal/mol                                 |            |            |           |
| H | -1.035954 | 10.073169 | 4.683053  | E(PM7) = 61.75105 Kcal/mol                                  |            |            |           |
| C | -2.625575 | 9.602271  | 3.275298  | E( $\omega$ B97X-V/def2-TZVP) = -14776.334356350009 Hartree |            |            |           |
| H | -3.382346 | 9.481434  | 4.080396  | E(GFN1-xTB) = -208.696067752465 Hartree                     |            |            |           |
| H | -2.855642 | 8.822143  | 2.517884  | E(GFN2-xTB) = -205.331254471334 Hartree                     |            |            |           |
| C | -2.744455 | 10.990684 | 2.640375  | E(GFN-FF) = -24.582904181538 Hartree                        |            |            |           |
| H | -1.978122 | 11.096060 | 1.839901  | Coordinates:                                                |            |            |           |
| H | -2.493199 | 11.765988 | 3.398394  | C                                                           | 2.482075   | -0.501899  | 1.638654  |
| C | -4.131838 | 11.268426 | 2.060300  | C                                                           | 3.911871   | -0.656653  | 1.416126  |
| H | -4.189515 | 12.275280 | 1.600463  | C                                                           | 4.212143   | 0.014906   | 0.242367  |
| H | -4.914479 | 11.212474 | 2.845143  | C                                                           | 2.965653   | 0.578576   | -0.253902 |
| H | -4.396000 | 10.526225 | 1.278616  | C                                                           | 2.809018   | 1.470002   | -1.343021 |
| C | -3.733532 | -1.737218 | 2.887333  | C                                                           | 1.555907   | 1.715701   | -1.947196 |
| C | -4.695806 | -2.642426 | 2.396756  | C                                                           | 1.325286   | 2.710416   | -2.976436 |
| H | -4.678882 | -2.916082 | 1.331345  | H                                                           | 2.063843   | 3.441270   | -3.320453 |
| C | -5.700452 | -3.163443 | 3.222935  | C                                                           | 0.027835   | 2.553930   | -3.396893 |
| H | -6.447247 | -3.843202 | 2.791694  | H                                                           | -0.510521  | 3.131144   | -4.155347 |
| C | -5.748969 | -2.796343 | 4.585600  | C                                                           | -0.534954  | 1.464275   | -2.624042 |
| C | -4.774406 | -1.908775 | 5.094669  | C                                                           | -1.818410  | 0.915191   | -2.839124 |
| H | -4.820340 | -1.642856 | 6.160450  | C                                                           | -2.381807  | -0.059833  | -1.980575 |
| C | -3.791317 | -1.386351 | 4.257072  | C                                                           | -3.533999  | -0.506103  | -2.253451 |
|   |           |           |           | C                                                           | -3.837684  | -1.565988  | -1.073902 |
|   |           |           |           | C                                                           | -2.869702  | -1.125277  | -0.080791 |
|   |           |           |           | C                                                           | -2.880041  | -1.415020  | -1.305126 |
|   |           |           |           | C                                                           | -1.749684  | -1.218566  | 2.129128  |
|   |           |           |           | C                                                           | -1.749836  | -1.381318  | 3.569641  |
|   |           |           |           | H                                                           | -2.637191  | -1.278928  | 4.181208  |
|   |           |           |           | C                                                           | -0.450300  | -1.233131  | 3.986359  |
|   |           |           |           | H                                                           | -0.059178  | -1.278498  | 5.007621  |
|   |           |           |           | C                                                           | 0.344356   | -0.979220  | 2.800635  |
|   |           |           |           | C                                                           | 1.753750   | -0.884225  | 2.791325  |

|   |            |           |            |    |           |            |            |
|---|------------|-----------|------------|----|-----------|------------|------------|
| C | 3.984916   | 2.224899  | -1.845056  | H  | 7.086339  | -1.454882  | 7.589959   |
| C | 4.398353   | 2.144651  | -3.189520  | N  | 1.933662  | 0.178713   | 0.570536   |
| C | 3.850642   | 1.485026  | -3.878872  | N  | 0.397158  | 1.002122   | -1.717270  |
| C | 5.513767   | 2.853625  | -3.656879  | N  | -1.960727 | -0.281061  | -0.685181  |
| H | 5.816274   | 2.747787  | -4.706889  | N  | -0.473634 | -0.928584  | 1.690266   |
| C | 6.235403   | 3.683229  | -2.772297  | O  | 7.325915  | 4.414793   | -3.119554  |
| C | 5.819966   | 3.787210  | -1.425553  | O  | -5.043906 | 2.832891   | -7.103535  |
| H | 6.388781   | 4.446002  | -0.753763  | O  | -7.669400 | -3.244699  | 3.746806   |
| C | 4.718692   | 3.064353  | -0.972974  | O  | 4.610513  | -1.747564  | 7.621086   |
| H | 4.407454   | 3.144914  | 0.079388   | Cu | -0.028373 | 0.005508   | -0.031470  |
| C | 7.811554   | 4.344459  | -4.458706  | Br | 5.132280  | -1.729198  | 2.355350   |
| H | 7.019398   | 4.680388  | -5.167191  | Br | 5.889316  | -0.034702  | -0.597969  |
| H | 8.063664   | 3.287773  | -4.713766  | Br | -4.355431 | -1.269497  | -3.902164  |
| C | 9.043447   | 5.230074  | -4.564500  | Br | -5.121276 | -2.927785  | -0.929391  |
| H | 8.752529   | 6.271992  | -4.306478  | C  | -1.106074 | -2.961684  | -6.098957  |
| H | 9.356924   | 5.249562  | -5.631312  | H  | -1.052378 | -4.026746  | -6.366573  |
| C | 10.209884  | 4.780650  | -3.679158  | C  | -1.591143 | -2.051473  | -7.064837  |
| H | 9.853973   | 4.722423  | -2.629033  | C  | -1.682599 | 0.681315   | -6.739978  |
| H | 10.499712  | 3.743206  | -3.959590  | H  | -2.053773 | -0.049427  | -7.470358  |
| C | 11.425121  | 5.702829  | -3.771963  | C  | -1.285672 | -0.241086  | -5.469579  |
| H | 12.252681  | 5.355125  | -3.121679  | H  | -1.340419 | 0.830903   | -5.228636  |
| H | 11.169487  | 6.737623  | -3.461884  | C  | -2.395089 | -1.716155  | -9.302162  |
| H | 11.816041  | 5.757753  | -4.809839  | H  | -1.629397 | -0.928639  | -9.491966  |
| C | -2.618340  | 1.428285  | -3.979414  | H  | -3.330511 | -1.198381  | -8.987283  |
| C | -2.156352  | 1.343848  | -5.308031  | C  | -2.640517 | -2.546614  | -10.549297 |
| H | -1.179242  | 0.878934  | -5.506713  | H  | -3.013826 | -1.868804  | -11.341376 |
| C | -2.934054  | 1.792552  | -6.383800  | H  | -3.464884 | -3.267632  | -10.335856 |
| H | -2.546393  | 1.683147  | -7.405239  | C  | -1.411050 | -3.325549  | -11.051810 |
| C | -4.203285  | 2.361526  | -6.142837  | H  | -1.722163 | -3.953195  | -11.913890 |
| C | -4.662050  | 2.483310  | -4.812142  | H  | -1.090588 | -4.031430  | -10.256835 |
| H | -5.462622  | 2.942957  | -4.642195  | C  | -0.231524 | -2.440970  | -11.440867 |
| C | -3.884402  | 2.018308  | -3.753846  | H  | 0.600083  | -3.046364  | -11.873672 |
| H | -4.258760  | 2.103103  | -2.722583  | H  | 0.179057  | -1.873335  | -10.600542 |
| C | -4.756546  | 2.582169  | -8.481212  | H  | -0.524885 | -1.703586  | -12.237956 |
| H | -3.708255  | 2.870936  | -8.719552  | C  | 4.405825  | -2.838690  | -0.193184  |
| H | -5.421884  | 3.279545  | -9.030160  | C  | 4.210362  | -4.109938  | -0.769675  |
| C | -5.045194  | 1.140554  | -8.897856  | H  | 3.220188  | -4.365086  | -1.176469  |
| H | -4.355429  | 0.451205  | -8.364019  | C  | 5.243474  | -5.052968  | -0.836282  |
| C | -4.795533  | 1.044837  | -9.978150  | H  | 5.047153  | -6.034156  | -1.287619  |
| H | -6.492980  | 0.705906  | -8.650358  | C  | 6.519173  | -4.728056  | -0.327551  |
| H | -7.177093  | 1.375562  | -9.218077  | C  | 6.726981  | -3.460714  | 0.262342   |
| H | -6.736614  | 0.866540  | -7.578638  | H  | 7.729151  | -3.224682  | 0.648239   |
| C | -6.753633  | -0.751179 | -9.031223  | C  | 5.684485  | -2.538039  | 0.333679   |
| H | -7.806888  | -1.041170 | -8.843520  | H  | 5.863377  | -1.546270  | 0.774605   |
| H | -6.109022  | -1.440329 | -8.446450  | C  | 7.464883  | -6.830949  | -0.982885  |
| H | -6.542376  | -0.935010 | -10.105652 | H  | 7.120516  | -6.699472  | -2.034251  |
| C | -4.135964  | -1.885513 | 1.942134   | H  | 6.692644  | -7.441009  | -0.455977  |
| C | -5.306439  | -1.104954 | 1.860006   | C  | 8.819498  | -7.522797  | -0.924905  |
| H | -5.273701  | -0.149076 | 1.315602   | H  | 9.560119  | -6.894240  | -1.465592  |
| C | -6.506583  | -1.515513 | 2.453938   | H  | 9.145397  | -7.545600  | 0.136213   |
| H | -7.393710  | -0.874478 | 2.370693   | C  | 8.811343  | -8.944899  | -1.501027  |
| C | -6.558090  | -2.744479 | 3.145405   | H  | 8.078753  | -9.565206  | -0.937527  |
| C | -5.391097  | -3.535957 | 3.239658   | H  | 9.802866  | -9.404210  | -1.303326  |
| H | -5.451941  | -4.492907 | 3.777902   | C  | 8.508726  | -9.025482  | -3.000315  |
| C | -4.200905  | -3.106651 | 2.654260   | H  | 8.585804  | -10.067231 | -3.370982  |
| H | -3.302948  | -3.738814 | 2.717577   | H  | 9.221076  | -8.408379  | -3.587094  |
| C | -8.885788  | -2.501515 | 3.677587   | H  | 7.486712  | -8.668614  | -3.242542  |
| H | -9.165052  | -2.331086 | 2.610557   | C  | 1.567906  | 1.157904   | 4.790236   |
| H | -8.735373  | -1.500863 | 4.145537   | C  | 0.508312  | 1.114747   | 5.719502   |
| C | -9.987698  | -3.262316 | 4.402122   | H  | -0.508576 | 0.896486   | 5.360004   |
| H | -9.633590  | -3.498411 | 5.429698   | C  | 0.717489  | 1.351620   | 7.082583   |
| H | -10.833677 | -2.552156 | 4.522706   | H  | -0.137701 | 1.309978   | 7.769925   |
| C | -10.498163 | -4.535413 | 3.709764   | C  | 2.015338  | 1.650545   | 7.550721   |
| H | -10.801121 | -4.278538 | 2.669561   | C  | 3.089400  | 1.676317   | 6.633145   |
| H | -11.433596 | -4.850118 | 4.221158   | H  | 4.092703  | 1.913079   | 7.015575   |
| C | -9.519581  | -5.712611 | 3.687000   | C  | 2.867856  | 1.426587   | 5.279325   |
| H | -9.986807  | -6.608734 | 3.230519   | H  | 3.707843  | 1.477944   | 4.570946   |
| H | -9.202205  | -5.986192 | 4.714921   | C  | 1.294727  | 2.082557   | 9.807493   |
| H | -8.601294  | -5.473930 | 3.117080   | H  | 1.798281  | 1.984671   | 10.790753  |
| C | 2.478460   | -1.144247 | 4.060894   | H  | 0.554950  | 1.252047   | 9.739405   |
| C | 3.300361   | -0.142928 | 4.631640   | C  | 0.607685  | 3.442385   | 9.697636   |
| H | 3.392853   | 0.827625  | 4.121447   | H  | 1.381659  | 4.234125   | 9.794939   |
| C | 3.988321   | -0.366697 | 5.821871   | H  | 0.174007  | 3.559859   | 8.680873   |
| H | 4.622836   | 0.410344  | 6.271831   | C  | -0.485839 | 3.638418   | 10.751750  |
| C | 3.886907   | -1.613983 | 6.478578   | H  | -0.048602 | 3.504438   | 11.766490  |
| C | 3.065518   | -2.621158 | 5.928871   | H  | -1.246944 | 2.833176   | 10.645466  |
| H | 2.970642   | -3.601259 | 6.414109   | C  | -1.168401 | 5.003765   | 10.661312  |
| C | 2.368080   | -2.374736 | 4.737979   | H  | -1.957935 | 5.118663   | 11.430697  |
| H | 1.745101   | -3.170617 | 4.303509   | H  | -1.642341 | 5.150799   | 9.668645   |
| C | 4.569857   | -2.988523 | 8.324117   | H  | -0.438918 | 5.828017   | 10.803013  |
| H | 4.880710   | -3.818479 | 7.645767   | N  | -0.309755 | 1.374584   | 1.531900   |
| H | 3.523174   | -3.197691 | 8.646442   | N  | -1.025237 | 0.608741   | -1.146089  |
| C | 5.492644   | -2.918206 | 9.533172   | N  | 1.359163  | -0.978071  | -1.402926  |
| H | 5.217445   | -2.023802 | 10.134262  | N  | 1.968448  | -0.370867  | 1.341645   |
| H | 5.251941   | -3.800392 | 10.164329  | O  | -7.251755 | 4.859204   | 1.054649   |
| C | 6.999233   | -2.914055 | 9.231496   | O  | -1.943864 | -2.583615  | -8.263996  |
| H | 7.235868   | -3.791074 | 8.587558   | O  | 7.594456  | -5.557260  | -0.357362  |
| H | 7.539411   | -3.093735 | 10.186257  | O  | 2.336216  | 1.908478   | 8.847152   |
| C | 7.539563   | -1.636673 | 8.583166   | Cu | 0.493741  | 0.151973   | 0.084214   |
| H | 8.639888   | -1.690723 | 8.456341   | Br | 0.517849  | 4.176229   | 4.455350   |
| H | 7.317570   | -0.747567 | 9.209631   | Br | -2.087846 | 5.022538   | 2.294425   |



|    |          |           |           |
|----|----------|-----------|-----------|
| Br | 2.296770 | -1.170526 | -5.420259 |
| Br | 4.902346 | -2.009659 | -3.255614 |

|   |           |            |           |
|---|-----------|------------|-----------|
| N | -0.805330 | 8.125453   | 2.947203  |
| H | -1.729269 | 8.273518   | 3.362926  |
| N | -2.251139 | 7.718748   | 0.399413  |
| H | -2.702668 | 7.184816   | 1.153555  |
| N | 2.116388  | 1.343958   | -7.339521 |
| H | 1.265654  | 1.038393   | -7.817393 |
| N | 0.475011  | 3.768150   | -7.800294 |
| H | 0.307585  | 3.956612   | -8.798451 |
| S | -1.363824 | 6.643085   | -0.558924 |
| S | -0.636075 | 4.749561   | -6.948087 |
| F | -2.238332 | 3.550741   | 2.886601  |
| F | -2.775602 | 6.191461   | 3.142251  |
| F | 2.346028  | 4.587982   | 2.134293  |
| F | 1.810933  | 7.206597   | 2.450451  |
| F | 3.731804  | 1.629743   | -2.790377 |
| F | 3.995909  | 2.313944   | -5.351141 |
| F | -0.134131 | -0.940551  | -3.826407 |
| F | 0.120869  | -0.248327  | -6.425719 |
| O | -1.934304 | 5.311252   | -0.235426 |
| O | 0.094727  | 6.901246   | -0.439209 |
| O | 0.024920  | 5.981452   | -6.451876 |
| O | -1.803507 | 4.838470   | -7.857360 |
| C | 1.334233  | -4.165770  | 0.810130  |
| C | 0.815029  | -3.828235  | 2.075232  |
| C | 0.467749  | -4.803202  | 3.089341  |
| H | 0.575433  | -5.887579  | 2.982378  |
| C | -0.012089 | -4.101183  | 4.164206  |
| H | -4.360178 | -4.490772  | 5.126627  |
| C | 0.045684  | -2.698442  | 3.805622  |
| C | -0.326499 | -1.654034  | 4.672535  |
| C | -0.184844 | -0.285958  | 4.363348  |
| C | -0.475540 | 0.793310   | 5.285326  |
| H | -0.826896 | 0.676266   | 6.314181  |
| C | -0.230516 | 1.962779   | 4.614720  |
| H | -0.320993 | 2.987312   | 4.990579  |
| C | 0.160994  | 1.599168   | 3.269570  |
| C | 1.596333  | -5.603045  | 0.524890  |
| C | 2.635317  | -6.308609  | 1.165702  |
| C | 2.878630  | -7.655243  | 0.899089  |
| C | 2.113431  | -8.396101  | -0.039999 |
| C | 1.063586  | -7.686486  | -0.663770 |
| C | 0.832938  | -6.329913  | -0.402999 |
| C | 2.086513  | -10.532495 | -1.378434 |
| H | 2.232230  | -11.598619 | -1.103110 |
| H | 1.007097  | -10.408770 | -1.585381 |
| C | 2.899296  | -10.257558 | -2.660583 |
| H | 2.569120  | -10.966093 | -3.452980 |
| H | 3.972909  | -10.462697 | -2.472742 |
| C | 5.020539  | -7.682992  | -4.214115 |
| C | 6.295820  | -8.260638  | -4.168256 |
| H | 6.643558  | -8.730553  | -3.237330 |
| C | 7.107682  | -8.202489  | -5.309906 |
| H | 8.114389  | -8.647885  | -5.278882 |
| C | 6.665174  | -7.573840  | -6.491404 |
| C | 5.379153  | -6.987609  | -6.496959 |
| H | 5.023189  | -6.475204  | -7.404549 |
| C | 4.554645  | -7.033900  | -5.368692 |
| H | 3.562285  | -6.560302  | -5.369080 |
| H | 7.530174  | -7.539106  | -7.724612 |
| H | 8.602095  | -7.662971  | -7.476861 |
| H | 7.255286  | -8.360218  | -8.421318 |
| H | 7.408172  | -6.588752  | -8.280878 |
| C | -0.980806 | -2.008933  | 5.261633  |
| C | -0.430644 | -1.700713  | 7.218702  |
| C | -1.121192 | -1.928598  | 8.418277  |
| C | -2.423926 | -2.480702  | 8.426026  |
| C | -2.953320 | -2.832423  | 7.159781  |
| C | -2.258899 | -2.603901  | 5.972636  |
| C | -3.147888 | -1.842723  | 10.720648 |
| H | -3.791220 | -2.306406  | 11.497636 |
| H | -2.124621 | -1.803997  | 11.137364 |
| C | -3.627784 | -0.412844  | 10.432635 |
| H | -2.973261 | 0.042592   | 9.659984  |
| H | -3.523075 | 0.218194   | 11.344355 |
| H | -4.936657 | 0.743944   | 7.452280  |
| C | -4.184565 | 1.764392   | 6.854486  |
| H | -3.944591 | 2.666164   | 7.436005  |
| C | -3.752278 | 1.602659   | 5.529975  |
| H | -3.162479 | 2.393817   | 5.044594  |
| C | -4.050222 | 0.431842   | 4.802552  |
| C | -4.825149 | -0.569707  | 5.432055  |
| H | -5.056930 | -1.496044  | 4.885771  |
| C | -5.280395 | -0.419112  | 6.744752  |
| H | -5.870318 | -1.207507  | 7.231991  |
| C | -3.545375 | 0.236040   | 3.397259  |
| H | -3.007211 | -0.729126  | 3.308195  |
| H | -4.386969 | 0.204377   | 2.673596  |
| H | -2.858270 | 1.046593   | 3.092246  |
| N | 0.549921  | -2.554428  | 2.530466  |
| N | 0.216163  | 0.226638   | 3.146479  |
| N | 2.446626  | -9.723324  | -0.230817 |

## AVIXIO

Conformation 1.

Multiplicity: 2

Charge: 0

E(B97-3c) = -9171.813542538888 Hartree

E(GFN1-xTB) = -378.652543788501 Hartree

E(GFN2-xTB) = -362.172746393175 Hartree

E(GFN-FF) = -35.192734101492 Hartree

E(M06/def2-TZVP) = -9172.854485914644 Hartree

E(PBE - D3(BJ)/def2-TZVP) = -9169.270673509563 Hartree

E(PBE0 - D3(BJ)/def2-TZVP) = -9169.509589829700 Hartree

E(PBEh-3c) = -9158.825362182719 Hartree

E(PM6) = -561.13899 Kcal/mol

E(PM7) = -673.07934 Kcal/mol

E(ωB97X-V/def2-TZVP) = -9174.414034021638 Hartree

Coordinates:

|    |           |           |           |
|----|-----------|-----------|-----------|
| Cu | 0.773103  | -0.820359 | 1.498124  |
| C  | 0.356433  | 2.532813  | 2.234563  |
| C  | 0.707611  | 2.188497  | 0.915103  |
| C  | 0.807459  | 3.143396  | -0.171716 |
| H  | 0.610731  | 4.217319  | -0.095994 |
| C  | 1.142574  | 2.427847  | -1.290356 |
| H  | 1.280923  | 2.805254  | -2.307541 |
| C  | 1.251429  | 1.039835  | -0.887644 |
| C  | 1.587196  | -0.012038 | -1.762578 |
| C  | 1.684298  | -1.361394 | -1.371813 |
| C  | 2.176974  | -2.417817 | -2.233432 |
| H  | 2.538641  | -2.275885 | -3.257430 |
| C  | 2.136908  | -3.578966 | -1.506630 |
| H  | 2.461196  | -4.580005 | -1.814136 |
| C  | 1.595561  | -3.229282 | -0.206981 |
| C  | 0.085377  | 3.967795  | 2.521362  |
| C  | -1.214558 | 4.420067  | 2.816796  |
| C  | -1.489462 | 5.777826  | 2.985717  |
| C  | -0.496156 | 6.768226  | 2.843416  |
| C  | 0.816564  | 6.314737  | 2.582755  |
| C  | 1.087351  | 4.952613  | 2.407884  |
| C  | -0.539457 | 8.995526  | 1.801057  |
| H  | 0.389441  | 8.646546  | 1.316635  |
| H  | -0.361409 | 10.034037 | 2.153663  |
| C  | -1.693491 | 9.016095  | 0.771659  |
| H  | -2.544706 | 9.609796  | 1.170466  |
| H  | -1.364127 | 9.539963  | -0.151087 |
| C  | -1.837999 | 7.081917  | -2.225628 |
| C  | -0.924753 | 7.755934  | -3.050022 |
| H  | 0.064258  | 8.027313  | -2.654200 |
| C  | -1.284831 | 8.030389  | -4.376451 |
| H  | -0.564245 | 8.530436  | -5.039855 |
| C  | -2.536814 | 7.634504  | -4.892050 |
| C  | -3.433734 | 6.963719  | -4.029435 |
| H  | -4.411547 | 6.639015  | -4.417896 |
| C  | -3.096703 | 6.681769  | -2.702216 |
| H  | -3.785767 | 6.134299  | -2.043363 |
| C  | -2.888007 | 7.860600  | -6.336477 |
| H  | -2.674220 | 6.944393  | -6.928109 |
| H  | -2.290473 | 8.680934  | -6.777770 |
| H  | -3.963631 | 8.094490  | -6.462901 |
| C  | 1.794326  | 0.313953  | -3.199253 |
| C  | 2.830815  | 1.148087  | -3.656769 |
| C  | 2.967849  | 1.506346  | -5.006333 |
| C  | 2.059364  | 1.046225  | -5.988610 |
| C  | 1.033425  | 0.186205  | -5.524872 |
| C  | 0.905317  | -0.166509 | -4.182463 |
| C  | 2.643581  | 2.600548  | -7.853644 |
| H  | 2.615965  | 2.533532  | -8.961347 |
| H  | 3.706600  | 2.709540  | -7.568865 |
| C  | 1.876279  | 3.844919  | -7.386476 |
| H  | 1.901231  | 3.890623  | -6.277878 |
| H  | 2.385074  | 4.767045  | -7.747821 |
| C  | -1.034208 | 3.724439  | -5.538894 |
| C  | -0.986127 | 4.292550  | -4.259575 |
| H  | -0.644648 | 5.329380  | -4.136511 |
| C  | -1.377976 | 3.519992  | -3.157297 |
| H  | -1.361705 | 3.962891  | -2.150784 |
| C  | -1.794464 | 2.182699  | -3.315488 |
| C  | -1.838189 | 1.642355  | -4.622216 |
| H  | -2.142617 | 0.594592  | -4.765050 |
| C  | -1.476078 | 2.405104  | -5.736344 |
| H  | -1.501530 | 1.975323  | -6.747206 |
| C  | -2.154712 | 1.339041  | -2.121808 |
| H  | -3.195321 | 0.960468  | -2.196564 |
| H  | -2.052556 | 1.907692  | -1.178439 |
| H  | -1.493060 | 0.450502  | -2.061272 |
| N  | 0.976383  | 0.914106  | 0.458271  |
| N  | 1.349015  | -1.872813 | -0.137507 |

|   |           |           |           |   |           |           |           |
|---|-----------|-----------|-----------|---|-----------|-----------|-----------|
| H | 3.364405  | -9.934383 | 0.168193  | C | -3.786373 | -7.889520 | -2.700696 |
| N | 2.796585  | -8.894509 | -3.161366 | C | -3.603681 | -7.444876 | -1.384564 |
| H | 1.865278  | -8.460581 | -3.136077 | H | -4.256679 | -7.829632 | -0.587833 |
| N | -3.181115 | -2.725016 | 9.559518  | C | -2.569460 | -6.536402 | -1.113182 |
| H | -4.134678 | -2.991805 | 9.301193  | H | -2.405814 | -6.199351 | -0.078000 |
| N | -4.990333 | -0.437828 | 9.903671  | C | -1.721338 | -6.063560 | -2.136116 |
| H | -5.714864 | -0.667663 | 10.598633 | C | -1.935639 | -6.535146 | -3.451789 |
| S | 3.970356  | -7.742541 | -2.762513 | H | -1.291859 | -6.168489 | -4.265894 |
| S | -5.553645 | 0.981182  | 9.117777  | C | -2.951602 | -7.450200 | -3.740875 |
| F | 3.415783  | -5.680751 | 2.055405  | H | -3.099624 | -7.827751 | -4.762705 |
| F | 3.906078  | -8.287360 | 1.503423  | C | -0.619897 | -5.076145 | -1.855299 |
| F | -0.160145 | -5.726995 | -1.071437 | H | -0.869663 | -4.081826 | -2.280464 |
| F | 0.304903  | -8.278700 | -1.630027 | H | 0.331561  | -5.395741 | -2.326275 |
| F | 0.794202  | -1.160705 | 7.297923  | H | -0.449561 | -4.939422 | -0.771507 |
| F | -0.512347 | -1.597953 | 9.577932  | N | -1.206897 | -0.984011 | 0.430064  |
| F | -2.863627 | -2.914375 | 4.812545  | N | -1.513010 | 0.593104  | -1.948999 |
| F | -4.203908 | -3.346774 | 7.118765  | N | 1.236940  | -4.356329 | 7.220862  |
| O | 3.236538  | -6.459293 | -2.690050 | H | 2.237222  | -4.601926 | 7.228317  |
| O | 4.804190  | -8.255231 | -1.649233 | N | 2.357622  | -2.407067 | 8.556483  |
| O | -4.891685 | 2.182979  | 9.676443  | H | 2.424998  | -1.968833 | 7.531096  |
| O | -7.023382 | 0.832766  | 9.136101  | N | -6.258796 | -5.571221 | -3.520180 |

Conformation 10.

Multiplicity: 2

Charge: 0

E(B97-3c) = -9171.808552998102 Hartree

E(GFN1-xTB) = -378.644547962878 Hartree

E(GFN2-xTB) = -362.162721674580 Hartree

E(GFN-FF) = -35.180488258495 Hartree

E(M06/def2-TZVP) = -9172.848934895033 Hartree

E(PBE - D3(BJ)/def2-TZVP) = -9169.265357790482 Hartree

E(PBE0 - D3(BJ)/def2-TZVP) = -9169.502476600435 Hartree

E(PBEh-3c) = -9158.819719304962 Hartree

E(PM6) = -563.75709 Kcal/mol

E(PM7) = -672.86791 Kcal/mol

E( $\omega$ B97X-V/def2-TZVP) = -9174.404364332700 Hartree

Coordinates:

|    |           |           |           |   |            |           |            |
|----|-----------|-----------|-----------|---|------------|-----------|------------|
| Cu | -0.436716 | 0.775907  | -0.240791 | C | -0.773970  | 2.652141  | -3.125581  |
| C  | 0.001333  | -1.160341 | 2.589038  | C | 0.132372   | 3.104330  | -2.146861  |
| C  | -0.853360 | -1.649642 | 1.585809  | C | 0.939336   | 4.300321  | -2.285268  |
| C  | -1.512295 | -2.938378 | 1.642163  | H | 0.966288   | 4.943310  | -3.171153  |
| H  | -1.396539 | -3.671360 | 2.447671  | C | 1.628014   | 4.504400  | -1.110166  |
| C  | -2.282247 | -3.035104 | 0.512117  | H | 2.322234   | 5.249921  | -0.831237  |
| H  | -2.925148 | -3.864416 | 0.201321  | C | 1.259681   | 3.332154  | -0.264978  |
| C  | -2.082632 | -1.811403 | -0.239236 | C | 1.754021   | 3.136235  | 1.037627   |
| C  | -2.704510 | -1.534029 | -1.474826 | C | 1.415461   | 2.038310  | 1.851646   |
| C  | -2.447913 | -0.378605 | -2.238825 | C | 1.922342   | 1.838897  | 3.194199   |
| C  | -3.135605 | -0.054833 | -3.473641 | H | 2.582339   | 2.525464  | 3.732923   |
| H  | -3.950861 | -0.639852 | -3.912020 | C | 1.431736   | 0.633589  | 3.624547   |
| C  | -2.589742 | 1.110136  | -3.943684 | H | 1.586876   | 0.148218  | 4.594039   |
| H  | -2.869544 | 1.671387  | -4.842745 | C | 0.633613   | 0.096215  | 2.542189   |
| C  | -1.570633 | 1.499654  | -2.987647 | C | -0.915986  | 3.450153  | -4.374456  |
| C  | 0.281426  | -2.014182 | 3.775792  | C | -1.496584  | 4.735258  | -4.378038  |
| C  | -0.679496 | -2.265200 | 4.773201  | C | -1.633738  | 5.473934  | -5.552641  |
| C  | -0.390849 | -3.025955 | 5.915134  | C | -1.219563  | 4.978054  | -6.817392  |
| C  | 0.890888  | -3.593504 | 6.125317  | C | -0.628801  | 3.694812  | -6.803163  |
| C  | 1.855869  | -3.331674 | 5.115765  | C | -0.506030  | 2.952037  | -5.622233  |
| C  | 1.555408  | -2.581340 | 3.977289  | C | -1.433502  | 5.357682  | -9.300287  |
| C  | 0.777971  | -4.039509 | 8.570925  | H | -1.295646  | 6.252959  | -9.943019  |
| H  | 1.329429  | -4.721615 | 9.246499  | H | -0.564338  | 4.700489  | -9.488615  |
| H  | -0.302116 | -4.255421 | 8.688325  | C | -2.730402  | 4.647282  | -9.742538  |
| C  | 1.054899  | -2.573778 | 8.985311  | H | -2.648199  | 4.389377  | -10.822192 |
| H  | 0.291609  | -1.898578 | 8.547378  | H | -3.589534  | 5.341563  | -9.643227  |
| H  | 0.985007  | -2.474032 | 10.087154 | C | -5.658350  | 2.896981  | -8.334738  |
| C  | 5.041820  | -1.839871 | 8.604449  | C | -5.808399  | 1.515454  | -8.539322  |
| C  | 5.519497  | -0.882456 | 9.511668  | H | -4.988128  | 0.830654  | -8.279553  |
| H  | 5.063932  | -0.805844 | 10.509524 | C | -7.015930  | 1.036260  | -9.054928  |
| C  | 6.581916  | -0.060422 | 9.121181  | H | -7.143112  | -0.046372 | -9.212997  |
| H  | 6.969687  | 0.693705  | 9.823564  | C | -8.081262  | 1.912445  | -9.365605  |
| C  | 7.173800  | -0.179896 | 7.843132  | C | -7.901780  | 3.290761  | -9.133805  |
| C  | 6.651361  | -1.140767 | 6.949845  | H | -8.726263  | 3.987316  | -9.352456  |
| H  | 7.090705  | -1.236431 | 5.944910  | C | -6.697753  | 3.791915  | -8.617565  |
| C  | 5.594589  | -1.982482 | 7.322260  | H | -6.560687  | 4.863535  | -8.414157  |
| H  | 5.201959  | -2.747582 | 6.636211  | C | -9.369154  | 1.376557  | -9.935086  |
| C  | 8.349348  | 0.679967  | 7.469394  | H | -9.232250  | 1.055977  | -10.989929 |
| H  | 9.283155  | 0.273359  | 7.913868  | H | -9.720607  | 0.487793  | -9.372971  |
| H  | 8.227891  | 1.713730  | 7.843731  | H | -10.173173 | 2.136981  | -9.918835  |
| H  | 8.499945  | 0.731469  | 6.374559  | C | 2.736517   | 4.114994  | 1.579203   |
| C  | -3.658840 | -2.538268 | -2.014792 | C | 2.433682   | 4.961934  | 2.660062   |
| C  | -3.422091 | -3.213480 | -3.231098 | C | 3.373514   | 5.847539  | 3.207352   |
| C  | -4.302166 | -4.176624 | -3.722501 | C | 4.690605   | 5.932872  | 2.696802   |
| C  | -5.461435 | -4.570625 | -3.009363 | C | 4.984233   | 5.084537  | 1.599970   |
| C  | -5.717812 | -3.875089 | -1.803944 | C | 4.043951   | 4.205178  | 1.064088   |
| C  | -4.838276 | -2.892554 | -1.329872 | C | 5.775633   | 7.207631  | 4.551704   |
| C  | -7.020214 | -6.473503 | -2.665272 | H | 6.607948   | 7.940167  | 4.606746   |
| H  | -7.959793 | -6.001191 | -2.315134 | H | 4.858091   | 7.746829  | 4.852044   |
| H  | -6.443853 | -6.752190 | -1.753563 | C | 6.028000   | 6.061399  | 5.541417   |
| C  | -7.354613 | -7.740304 | -3.451580 | H | 5.191468   | 5.334228  | 5.481642   |
| H  | -7.856083 | -8.465152 | -2.774567 | H | 6.031475   | 6.449635  | 6.585002   |
| H  | -8.051811 | -7.496925 | -4.280054 | C | 6.596807   | 2.780230  | 4.621714   |

|   |           |           |           |   |            |           |           |
|---|-----------|-----------|-----------|---|------------|-----------|-----------|
| C | 5.695397  | 1.811041  | 5.083540  | C | -9.281069  | -4.405333 | 7.691941  |
| H | 5.483799  | 1.732351  | 6.159423  | H | -8.753144  | -4.676740 | 8.624476  |
| C | 5.082142  | 0.959992  | 4.152015  | H | -9.194797  | -5.268519 | 7.001490  |
| H | 4.375101  | 0.192475  | 4.501235  | H | -10.359004 | -4.270262 | 7.921624  |
| C | 5.340512  | 1.075504  | 2.770271  | C | 1.462238   | 4.129694  | -2.281791 |
| C | 6.257161  | 2.063870  | 2.341984  | C | 1.581963   | 3.963313  | -3.679857 |
| H | 6.454968  | 2.187393  | 1.266594  | C | 2.149158   | 4.941289  | -4.494727 |
| C | 6.896985  | 2.906033  | 3.255265  | C | 2.625534   | 6.179233  | -3.984466 |
| H | 7.599528  | 3.678595  | 2.914133  | C | 2.466573   | 6.359602  | -2.587108 |
| C | 4.648044  | 0.194939  | 1.765019  | C | 1.909726   | 5.361121  | -1.771674 |
| H | 4.055060  | 0.808001  | 1.054642  | C | 4.030053   | 8.183492  | -4.498761 |
| H | 5.385737  | -0.372372 | 1.160316  | H | 3.548095   | 8.777917  | -3.701346 |
| H | 3.962737  | -0.524456 | 2.249064  | H | 4.127410   | 8.850351  | -5.381170 |
| N | 0.353331  | 2.522161  | -0.916956 | C | 5.441113   | 7.776026  | -4.017204 |
| N | 0.617336  | 0.975988  | 1.481998  | H | 5.856401   | 6.589403  | -3.385386 |
| N | -1.408931 | 5.792190  | -7.917098 | H | 5.368408   | 6.886825  | -3.354980 |
| H | -2.045659 | 6.563236  | -7.701821 | C | 6.682661   | 4.829913  | -4.845423 |
| N | -3.049010 | 3.446774  | -8.984247 | C | 5.775549   | 3.764830  | -4.760590 |
| H | -2.270321 | 2.811182  | -8.770647 | H | 4.867040   | 3.766879  | -5.379722 |
| N | 5.676762  | 6.783495  | 3.162473  | C | 6.064552   | 2.704624  | -3.893843 |
| H | 6.581894  | 6.566488  | 2.739667  | H | 5.380627   | 1.846764  | -3.863499 |
| N | 7.259672  | 5.356840  | 5.189045  | C | 7.223427   | 2.703085  | -3.086380 |
| H | 8.129113  | 5.865826  | 5.400474  | C | 8.112950   | 3.795132  | -3.200459 |
| S | -4.113052 | 3.516076  | -7.671197 | H | 9.025569   | 3.811727  | -2.584519 |
| S | 7.479294  | 3.783127  | 5.814476  | C | 7.862567   | 4.851082  | -4.083754 |
| F | -1.936691 | 5.270290  | -3.231040 | H | 8.563913   | 5.692473  | -4.179117 |
| F | -2.225304 | 6.685793  | -5.520827 | C | 7.503027   | 1.559670  | -2.150192 |
| F | 0.026424  | 1.725218  | -5.710430 | H | 6.636522   | 1.352173  | -1.490267 |
| F | -0.263243 | 3.086894  | -7.967546 | H | 8.384575   | 1.759181  | -1.511936 |
| F | 1.209606  | 4.933822  | 3.204118  | H | 7.695249   | 0.631790  | -2.726609 |
| F | 2.990803  | 6.622884  | 4.246092  | N | -0.529507  | 1.981772  | 0.167806  |
| F | 4.425734  | 3.393440  | 0.062330  | N | 1.759555   | 0.631526  | -0.897792 |
| F | 6.245855  | 5.103709  | 1.108555  | N | -7.335871  | 3.942253  | 3.814408  |
| O | -3.606775 | 2.507175  | -6.713487 | H | -8.073748  | 3.714402  | 3.144641  |
| O | -4.338553 | 4.933450  | -7.300308 | N | -7.084107  | 1.852699  | 6.115722  |
| O | 6.795260  | 3.635861  | 7.123481  | H | -6.168272  | 2.273735  | 6.321512  |
| O | 8.934183  | 3.547873  | 5.686998  | N | 3.154107   | 7.088211  | -4.876710 |

Conformation 13.

Multiplicity: 2

Charge: 0

E(B97-3c) = -9171.820368251789 Hartree  
E(GFN1-xTB) = -378.662387022279 Hartree  
E(GFN2-xTB) = -362.192403200733 Hartree  
E(GFN-FF) = -35.202469556621 Hartree  
E(M06/def2-TZVP) = -9172.860170840058 Hartree  
E(PBE - D3(BJ)/def2-TZVP) = -9169.278208466691 Hartree  
E(PBE0 - D3(BJ)/def2-TZVP) = -9169.516516938764 Hartree  
E(PBEh-3c) = -9158.829396510075 Hartree  
E(PM6) = -570.47663 Kcal/mol  
E(PM7) = -683.23308 Kcal/mol  
E( $\omega$ B97X-V/def2-TZVP) = -9174.418778478581 Hartree

Coordinates:

|    |           |           |           |   |           |           |           |
|----|-----------|-----------|-----------|---|-----------|-----------|-----------|
| Cu | 0.235209  | 0.090532  | 0.290195  | C | 2.985939  | -1.530389 | -1.053203 |
| C  | -2.438601 | 1.740589  | 1.728977  | C | 2.074496  | -2.304046 | -0.312423 |
| C  | -1.663302 | 2.451266  | 0.794573  | C | 2.188568  | -3.734538 | -0.114278 |
| C  | -1.952139 | 3.803395  | 0.358241  | H | 2.993880  | -4.360499 | -0.513343 |
| H  | -2.794531 | 4.408733  | 0.710075  | C | 1.113048  | -4.114594 | 0.647361  |
| C  | -0.981111 | 4.140983  | -0.550113 | H | 0.852351  | -5.119558 | 0.995635  |
| H  | -0.862699 | 5.079672  | -1.101680 | C | 0.362762  | -2.909003 | 0.940353  |
| C  | -0.088006 | 3.004248  | -0.645407 | C | -0.770280 | -2.859845 | 1.774880  |
| C  | 1.085503  | 2.974422  | -1.420006 | C | -1.455788 | -1.673196 | 2.100646  |
| C  | 1.966057  | 1.873717  | -1.457667 | C | -2.545023 | -1.614068 | 3.053639  |
| H  | 3.221034  | 1.890278  | -2.178038 | H | -2.903550 | -2.458809 | 3.650442  |
| C  | 3.642115  | 2.761589  | -2.686735 | C | -3.012368 | -0.325210 | 3.048750  |
| C  | 3.743490  | 0.628262  | -2.096100 | H | -3.834523 | 0.096036  | 3.637335  |
| H  | 4.640368  | 0.235859  | -2.581691 | C | -2.198413 | 0.402941  | 2.096110  |
| C  | 2.821971  | -0.152258 | -1.298019 | C | 4.162746  | -2.177915 | -1.703077 |
| C  | -3.656934 | 2.392660  | 2.292348  | C | 5.486851  | -1.842617 | -1.353619 |
| C  | -3.736725 | 2.858366  | 3.613433  | C | 6.580343  | -2.284138 | -2.098089 |
| C  | -4.917296 | 3.399607  | 4.144988  | C | 6.439434  | -3.075286 | -3.268564 |
| C  | -6.111887 | 3.457235  | 3.394813  | C | 5.112980  | -3.442005 | -3.590688 |
| C  | -6.016932 | 2.998434  | 2.054962  | C | 4.018552  | -2.991100 | -2.840509 |
| C  | -4.839223 | 2.472475  | 1.528341  | C | 7.657456  | -3.895719 | -5.323560 |
| C  | -7.786858 | 4.085174  | 5.184139  | H | 8.617423  | -4.440165 | -5.452315 |
| H  | -8.672791 | 4.754879  | 5.177938  | H | 6.854614  | -4.636401 | -5.490816 |
| H  | -7.008451 | 4.607123  | 5.773300  | C | 7.592138  | -2.795096 | -6.405700 |
| C  | -8.188133 | 2.779746  | 5.899305  | H | 7.646757  | -3.274715 | -7.407977 |
| H  | -8.646513 | 3.037589  | 6.880255  | H | 8.473928  | -2.129327 | -6.318167 |
| H  | -8.965505 | 2.251286  | 5.309851  | C | 6.379510  | 0.826454  | -6.638769 |
| C  | -7.633357 | -0.840440 | 5.900773  | C | 5.140272  | 1.167466  | -7.203709 |
| C  | -7.165343 | -1.254750 | 7.157383  | H | 4.239442  | 0.590212  | -6.950225 |
| H  | -6.375906 | -0.685361 | 7.669213  | C | 5.068917  | 2.275132  | -8.055829 |
| C  | -7.707510 | -2.408830 | 7.733151  | H | 4.098253  | 2.558346  | -8.491071 |
| H  | -7.336019 | -2.754525 | 8.709560  | C | 6.208983  | 3.057374  | -8.344627 |
| C  | -8.706391 | -3.159744 | 7.074367  | C | 7.433373  | 2.699391  | -7.738532 |
| C  | -9.148508 | -2.716097 | 5.809688  | H | 8.321725  | 3.325371  | -7.913151 |
| H  | -9.912976 | -3.297527 | 5.271273  | H | 7.529912  | 1.588322  | -6.891435 |
| C  | -8.619804 | -1.564057 | 5.215379  | H | 8.473488  | 1.329672  | -6.390974 |
| H  | -8.944735 | -1.227098 | 4.221132  | C | 6.130485  | 4.238873  | -9.272556 |

|   |           |           |            |   |           |           |           |
|---|-----------|-----------|------------|---|-----------|-----------|-----------|
| H | 5.085279  | 4.568145  | -9.422003  | C | -4.109590 | 6.852407  | 3.876268  |
| H | 6.707746  | 5.093580  | -8.869847  | H | -4.794136 | 5.984009  | 3.873459  |
| H | 6.556182  | 3.980469  | -10.265961 | H | -4.745757 | 7.758197  | 3.831087  |
| C | -1.308010 | -4.125339 | 2.348475   | C | -3.339264 | 6.859902  | 5.212677  |
| C | -0.629459 | -4.860893 | 3.336796   | H | -2.669715 | 5.970441  | 5.270094  |
| C | -1.164165 | -6.026617 | 3.906038   | H | -2.681720 | 7.752489  | 5.259151  |
| C | -2.441108 | -6.511161 | 3.533744   | C | -3.706326 | 4.543236  | 7.704885  |
| C | -3.112767 | -5.774470 | 2.525916   | C | -3.039137 | 3.553557  | 6.964585  |
| C | -2.571379 | -4.618731 | 1.960035   | H | -3.319221 | 3.365632  | 5.919358  |
| C | -2.965006 | -8.033253 | 5.433507   | C | -2.039382 | 2.796455  | 7.591808  |
| H | -3.196584 | -9.117174 | 5.517456   | H | -1.524447 | 2.007857  | 7.021160  |
| H | -1.937300 | -7.897898 | 5.813775   | C | -1.692639 | 3.007147  | 8.943973  |
| C | -3.946953 | -7.230307 | 6.297431   | C | -2.390025 | 4.006093  | 9.660097  |
| H | -3.722349 | -6.148391 | 6.188436   | H | -2.151166 | 4.171379  | 10.722527 |
| H | -3.819184 | -7.476943 | 7.375697   | C | -3.393472 | 4.770760  | 9.055823  |
| C | -6.339265 | -5.077503 | 4.962962   | H | -3.960881 | 5.521323  | 9.625511  |
| C | -5.686016 | -3.869155 | 5.246371   | C | -0.608592 | 2.200627  | 9.604403  |
| H | -5.283426 | -3.690480 | 6.252953   | H | -0.484755 | 1.204751  | 9.138950  |
| C | -5.605926 | -2.893720 | 4.246851   | H | -0.807323 | 2.051610  | 10.683668 |
| H | -5.139032 | -1.926335 | 4.479701   | H | 0.375749  | 2.709961  | 9.526477  |
| C | -6.164817 | -3.107556 | 2.966712   | C | -2.414468 | -0.378765 | -4.088282 |
| C | -6.813477 | -4.336553 | 2.717904   | C | -3.602490 | -0.768714 | -3.438366 |
| H | -7.256104 | -4.519172 | 1.726595   | C | -4.841838 | -0.670502 | -4.066396 |
| C | -6.911279 | -5.322971 | 3.705851   | C | -4.990528 | -0.128831 | -5.364647 |
| H | -7.433893 | -6.271707 | 3.518062   | C | -3.792540 | -0.191222 | -6.042537 |
| C | -6.067827 | -2.042134 | 1.909306   | C | -2.543990 | 0.082519  | -5.409348 |
| H | -5.017174 | -1.934293 | 1.568409   | C | -6.648501 | 1.148696  | -6.732924 |
| H | -6.692319 | -2.281507 | 1.027680   | H | -7.755658 | 1.127332  | -6.795634 |
| H | -6.380440 | -1.055479 | 2.307485   | H | -6.271157 | 0.989161  | -7.764605 |
| N | 0.954018  | -1.822676 | 0.332119   | C | -6.158881 | 2.536580  | -6.281971 |
| N | -1.237113 | -0.426854 | 1.555653   | H | -5.056258 | 2.574200  | -6.376885 |
| N | 7.587391  | -3.424802 | -3.953277  | H | -6.563936 | 3.303313  | -6.980172 |
| H | 8.387363  | -2.861953 | -3.654267  | C | -5.445104 | 3.319002  | -2.370649 |
| N | 6.407212  | -1.949273 | -6.346216  | C | -5.585004 | 1.967209  | -2.026959 |
| H | 5.512811  | -2.428465 | -6.181451  | H | -5.784952 | 1.220538  | -2.802957 |
| N | -3.025878 | -7.669930 | 4.023055   | C | -5.482162 | 1.592164  | -0.683490 |
| H | -3.977090 | -7.779776 | 3.655631   | H | -5.579103 | 0.527237  | -0.421880 |
| N | -5.311590 | -7.456645 | 5.818246   | C | -5.236001 | 2.545384  | 0.328738  |
| H | -5.706513 | -8.375078 | 6.065630   | C | -5.117883 | 3.901656  | -0.047536 |
| S | 6.445406  | -0.511497 | -5.453498  | H | -4.939001 | 4.663824  | 0.727656  |
| S | -6.503789 | -6.305204 | 6.247917   | C | -5.218402 | 4.297203  | -1.388419 |
| F | 5.720023  | -1.036490 | -0.305482  | H | -5.123594 | 5.351577  | -1.685758 |
| F | 7.827537  | -1.890459 | -1.752947  | C | -5.079632 | 2.120522  | 1.764029  |
| F | 2.793117  | -3.318939 | -3.273482  | H | -5.702980 | 1.234887  | 1.995373  |
| F | 4.845380  | -4.127107 | -4.737670  | H | -5.342162 | 2.930702  | 2.470722  |
| F | 0.575144  | -4.453651 | 3.761375   | H | -4.026192 | 1.840364  | 1.975324  |
| F | -0.427996 | -6.679732 | 4.832254   | N | -0.220538 | 0.990159  | -1.358864 |
| F | -3.292649 | -3.964453 | 1.036608   | N | 0.943069  | -1.341890 | -2.556968 |
| F | -4.327015 | -6.213526 | 2.127688   | N | -3.261267 | 6.851412  | 2.697268  |
| O | 5.165425  | -0.480625 | -4.702358  | H | -3.009754 | 7.758954  | 2.305468  |
| O | 7.764591  | -0.431748 | -4.771736  | N | -4.259922 | 6.933526  | 6.342895  |
| O | -6.159036 | -5.663425 | 7.539832   | H | -3.985014 | 7.545192  | 7.117312  |
| O | -7.778061 | -7.041205 | 6.069530   | N | -6.267701 | 0.035901  | -5.872258 |
|   |           |           |            | H | -6.968117 | -0.185584 | -5.163111 |
|   |           |           |            | N | -6.471365 | 2.833634  | -4.879584 |
|   |           |           |            | H | -7.395702 | 3.261501  | -4.736386 |
|   |           |           |            | S | -5.003062 | 5.528638  | 6.945434  |
|   |           |           |            | S | -5.311274 | 3.825911  | -4.082451 |
|   |           |           |            | F | 0.085318  | 5.417862  | -0.359689 |
|   |           |           |            | F | -1.477611 | 7.351787  | 0.734642  |
|   |           |           |            | F | -1.727801 | 2.269288  | 2.707928  |
|   |           |           |            | F | -3.330235 | 4.129917  | 3.723346  |
|   |           |           |            | F | -3.567568 | -1.178322 | -2.161538 |
|   |           |           |            | F | -5.971706 | -0.982519 | -3.380259 |
|   |           |           |            | F | -1.456035 | 0.467877  | -6.087475 |
|   |           |           |            | F | -3.843165 | 0.677326  | -7.302255 |
|   |           |           |            | O | -5.496156 | 4.789544  | 5.764484  |
|   |           |           |            | O | -5.888074 | 6.014397  | 8.019891  |
|   |           |           |            | O | -3.997116 | 3.377173  | -4.607401 |
|   |           |           |            | O | -5.694864 | 5.252305  | -4.164755 |
|   |           |           |            | C | 2.863466  | -2.905148 | -2.457838 |
|   |           |           |            | C | 3.405091  | -2.438396 | -1.242827 |
|   |           |           |            | C | 4.534684  | -3.055178 | -0.575913 |
|   |           |           |            | H | 5.100626  | -3.909725 | -0.961174 |
|   |           |           |            | C | 4.720122  | -2.374842 | 0.600079  |
|   |           |           |            | H | 5.481629  | -2.545293 | 1.368744  |
|   |           |           |            | C | 3.712285  | -1.335015 | 0.644076  |
|   |           |           |            | C | 3.594762  | -0.402796 | 1.692426  |
|   |           |           |            | C | 2.693965  | 0.682299  | 1.688410  |
|   |           |           |            | C | 2.615032  | 1.686713  | 2.730901  |
|   |           |           |            | H | 3.228810  | 1.718380  | 3.635570  |
|   |           |           |            | C | 1.626114  | 2.562370  | 2.362721  |
|   |           |           |            | H | 1.280906  | 3.458645  | 2.889463  |
|   |           |           |            | C | 1.077668  | 2.071214  | 1.117987  |
|   |           |           |            | C | 3.539200  | -4.054145 | -3.122353 |
|   |           |           |            | C | 4.789085  | -3.908312 | -3.757204 |
|   |           |           |            | C | 5.424922  | -4.937555 | -4.376398 |
|   |           |           |            | C | 4.852786  | -6.282517 | -4.423012 |
|   |           |           |            | C | 3.610246  | -6.423615 | -3.766341 |
|   |           |           |            | C | 2.969640  | -5.336614 | -3.158506 |
|   |           |           |            | C | 5.019766  | -8.518448 | -5.574152 |

Conformation 14.

Multiplicity: 2

Charge: 0

E(B97-3c) = -9171.796571575876 Hartree

E(GFN1-xTB) = -378.632797383453 Hartree

E(GFN2-xTB) = -362.151388178892 Hartree

E(GFN-FF) = -35.175255388708 Hartree

E(M06/def2-TZVP) = -9172.837903378861 Hartree

E(PBE - D3(BJ)/def2-TZVP) = -9169.256506800213 Hartree

E(PBE0 - D3(BJ)/def2-TZVP) = -9169.493729390215 Hartree

E(PBEh-3c) = -9158.806131438232 Hartree

E(PM6) = -554.04840 Kcal/mol

E(PM7) = -663.36746 Kcal/mol

E( $\omega$ B97X-V/def2-TZVP) = -9174.396102721235 Hartree

Coordinates:

|    |           |           |           |
|----|-----------|-----------|-----------|
| Cu | 1.349602  | -0.201096 | -0.923741 |
| C  | -0.031197 | 2.646208  | 0.474123  |
| C  | -0.616008 | 2.132758  | -0.695849 |
| C  | -1.782513 | 2.706783  | -1.336634 |
| H  | -2.291804 | 3.625305  | -1.029798 |
| C  | -2.104383 | 1.883136  | -2.382257 |
| H  | -2.896851 | 2.028060  | -3.122918 |
| C  | -1.134887 | 0.804508  | -2.371419 |
| C  | -1.166163 | -0.271553 | -3.278629 |
| C  | -0.151995 | -1.236458 | -3.387540 |
| C  | -0.084915 | -2.234237 | -4.435910 |
| H  | -0.826255 | -2.355680 | -5.233246 |
| C  | 1.083052  | -2.928236 | -4.250259 |
| H  | 1.500056  | -3.729423 | -4.871341 |
| C  | 1.697394  | -2.385150 | -3.050995 |
| C  | -0.747803 | 3.771494  | 1.139089  |
| C  | -0.718496 | 5.095603  | 0.660374  |
| C  | -1.539274 | 6.086082  | 1.205698  |
| C  | -2.457236 | 5.825799  | 2.259119  |
| C  | -2.479446 | 4.492926  | 2.735352  |
| C  | -1.631575 | 3.517487  | 2.199989  |

|   |           |           |            |   |           |           |           |
|---|-----------|-----------|------------|---|-----------|-----------|-----------|
| H | 5.866926  | -9.213229 | -5.756833  | C | 2.087001  | -1.439621 | 0.949368  |
| H | 4.398053  | -8.984566 | -4.787243  | H | 2.824091  | -2.224219 | 0.757937  |
| C | 4.207877  | -8.403921 | -6.880897  | C | 0.754227  | -1.384956 | 0.383447  |
| H | 3.875918  | -9.421393 | -7.186559  | C | 0.246090  | -2.327917 | -0.534251 |
| H | 4.858989  | -8.021442 | -7.693110  | C | -1.062301 | -2.295185 | -1.049193 |
| C | 2.405410  | -5.901378 | -8.915649  | C | -1.607959 | -3.311647 | -1.927458 |
| C | 3.216798  | -5.838719 | -10.056291 | H | -1.062607 | -4.192271 | -2.282891 |
| H | 4.308399  | -5.778463 | -9.941433  | C | -2.912181 | -2.912181 | -2.172242 |
| C | 2.610240  | -5.836880 | -11.319886 | H | -3.652593 | -3.517232 | -2.768772 |
| H | 3.241609  | -5.787785 | -12.220908 | C | -3.156450 | -1.739414 | -1.445473 |
| C | 1.208045  | -5.888178 | -11.458866 | C | 1.930601  | 2.276101  | 2.965632  |
| C | 0.420352  | -5.941758 | -10.287173 | C | 1.970098  | 2.460743  | 4.363237  |
| H | -0.676906 | -5.975968 | -10.375457 | C | 3.083541  | 3.015518  | 4.996011  |
| C | 1.006121  | -5.944541 | -9.017171  | C | 4.242507  | 3.428415  | 4.283710  |
| H | 0.390869  | -5.969622 | -8.106228  | C | 4.193056  | 3.253630  | 2.878377  |
| C | 0.562328  | -5.846851 | -12.819485 | C | 3.072534  | 2.689589  | 2.253858  |
| H | -0.389138 | -6.413743 | -12.838256 | C | 6.632378  | 4.220268  | 4.514195  |
| H | 0.323111  | -4.800496 | -13.107887 | H | 7.178002  | 4.765575  | 5.307464  |
| H | 1.229540  | -6.256769 | -13.602498 | H | 6.619728  | 4.871184  | 3.618321  |
| C | 4.398410  | -0.615685 | 2.926851   | C | 7.421318  | 2.936274  | 4.189865  |
| C | 5.351527  | 0.305604  | 3.396207   | H | 7.359697  | 2.229849  | 5.051195  |
| C | 5.963485  | 0.178568  | 4.651892   | H | 6.959402  | 2.424207  | 3.323145  |
| C | 5.642372  | -0.887741 | 5.524862   | C | 10.144032 | 1.631819  | 5.660007  |
| C | 4.723950  | -1.842258 | 5.023320   | C | 9.408076  | 1.214151  | 6.778424  |
| C | 4.123308  | -1.710221 | 3.771560   | H | 8.787570  | 1.942791  | 7.319564  |
| C | 6.497132  | 0.057725  | 7.662500   | C | 9.510861  | -0.119185 | 7.201684  |
| H | 6.930433  | -0.367455 | 8.591828   | H | 8.940419  | -0.451738 | 8.083030  |
| H | 7.286754  | 0.679546  | 7.201304   | C | 10.340243 | -1.038597 | 6.528475  |
| C | 5.300300  | 0.955438  | 8.008100   | C | 11.084263 | -0.580680 | 5.417117  |
| H | 4.868077  | 1.365214  | 7.071298   | H | 11.755936 | -1.278419 | 4.892428  |
| H | 5.640888  | 1.830574  | 8.606506   | C | 10.994521 | 0.744260  | 4.979103  |
| C | 1.971854  | 0.389020  | 7.211795   | H | 11.591611 | 1.106676  | 4.129227  |
| C | 1.273572  | 1.351041  | 6.467832   | C | 10.434543 | -2.475766 | 6.970500  |
| H | 1.254999  | 2.394762  | 6.812561   | H | 9.916642  | -3.145261 | 6.251051  |
| C | 0.623410  | 0.956204  | 5.289869   | H | 9.972773  | -2.631760 | 7.964160  |
| H | 0.075921  | 1.698824  | 4.691422   | H | 11.488879 | -2.815191 | 7.021104  |
| C | 0.679219  | -0.377379 | 4.834036   | C | 1.182144  | -3.371742 | -1.033444 |
| C | 1.382697  | -1.322528 | 5.615361   | C | 1.766109  | -4.335485 | -0.190376 |
| H | 1.454184  | -2.364118 | 5.269140   | C | 2.765346  | -5.213224 | -0.632278 |
| C | 2.017464  | -0.954219 | 6.805120   | C | 3.242194  | -5.171085 | -1.963721 |
| H | 2.579057  | -1.690852 | 7.395646   | C | 2.594989  | -4.257388 | -2.830378 |
| C | 0.038564  | -0.785066 | 3.534360   | C | 1.617078  | -3.373327 | -2.375235 |
| H | 0.777142  | -1.292350 | 2.880935   | C | 5.396364  | -6.338587 | -1.607755 |
| H | -0.789292 | -1.504809 | 3.705503   | H | 5.159612  | -7.227936 | -0.989617 |
| H | -0.366205 | 0.085636  | 2.986160   | H | 5.670084  | -5.521360 | -0.901741 |
| N | 2.925691  | -1.389519 | -0.487293  | C | 6.599877  | -6.648545 | -2.495766 |
| N | 1.753653  | 0.939790  | 0.712889   | H | 7.477702  | -6.868155 | -1.850486 |
| N | 5.565392  | -7.272649 | -5.071884  | H | 6.390855  | -7.545215 | -3.115508 |
| H | 6.313742  | -6.874070 | -5.644064  | C | 6.246905  | -2.988103 | -2.559538 |
| N | 3.048875  | -7.526109 | -6.798434  | C | 6.021981  | -2.461302 | -1.280243 |
| H | 2.487670  | -7.585365 | -5.939425  | H | 6.632818  | -2.814415 | -0.436920 |
| N | 6.175154  | -1.066166 | 6.790809   | C | 5.037083  | -1.476201 | -1.114637 |
| H | 5.700757  | -1.828409 | 7.280512   | H | 4.865715  | -1.040917 | -0.118676 |
| N | 4.258381  | 0.176884  | 8.676772   | C | 4.268451  | -1.017063 | -2.204644 |
| H | 4.489834  | -0.120181 | 9.635190   | C | 4.518508  | -1.576941 | -3.478911 |
| S | 3.162045  | -5.909699 | -7.290928  | H | 3.920802  | -1.241248 | -4.340038 |
| S | 2.697569  | 0.866906  | 8.777124   | C | 5.509164  | -2.544474 | -3.668894 |
| F | 5.392992  | -2.712561 | -3.769176  | H | 5.710972  | -2.956824 | -4.667678 |
| F | 6.603477  | -4.798392 | -5.006337  | C | 3.204611  | 0.034218  | -2.032267 |
| F | 1.771530  | -5.552920 | -2.597233  | H | 2.195020  | -0.422383 | -2.099190 |
| F | 2.935023  | -7.607940 | -3.806315  | H | 3.265204  | 0.794928  | -2.836328 |
| F | 5.687552  | 1.361934  | 2.642946   | H | 3.275062  | 0.545733  | -1.054464 |
| F | 6.860673  | 1.117705  | 5.024003   | N | 0.093325  | -0.263856 | 0.840191  |
| F | 3.204926  | -2.621329 | 3.406668   | N | -2.021180 | -1.345222 | -0.768039 |
| F | 4.370665  | -2.866740 | 5.834942   | N | 5.284665  | 3.974339  | 4.992411  |
| O | 2.264282  | -5.165389 | -6.379726  | H | 5.155586  | 3.936338  | 6.003334  |
| O | 4.589466  | -5.555805 | -7.478155  | N | 8.803416  | 3.243341  | 3.838909  |
| O | 2.777364  | 2.349113  | 8.801878   | H | 9.180262  | 2.822775  | 2.984703  |
| O | 2.049294  | 0.122695  | 9.879173   | N | 4.266272  | -5.957625 | -2.448930 |

Conformation 18.

Multiplicity: 2

Charge: 0

E(B97-3c) = -9171.796212722034 Hartree

E(GFN1-xTB) = -378.628962929520 Hartree

E(GFN2-xTB) = -362.148174375241 Hartree

E(GFN-FF) = -35.158265336237 Hartree

E(M06/def2-TZVP) = -9172.842458827785 Hartree

E(PBE - D3(BJ)/def2-TZVP) = -9169.254649370218 Hartree

E(PBE0 - D3(BJ)/def2-TZVP) = -9169.492385560572 Hartree

E(PBEh-3c) = -9158.808550530821 Hartree

E(PM6) = -558.81527 Kcal/mol

E(PM7) = -663.66912 Kcal/mol

E( $\omega$ B97X-V/def2-TZVP) = -9174.393694896908 Hartree

Coordinates:

|    |           |           |          |   |           |           |           |
|----|-----------|-----------|----------|---|-----------|-----------|-----------|
| Cu | -1.822881 | 0.274865  | 0.441420 | C | -4.399256 | -1.425608 | -0.660896 |
| C  | 0.771896  | 1.653308  | 2.269916 | C | -4.660808 | 0.088551  | -0.686988 |
| C  | 0.984842  | 0.407329  | 1.650135 | C | -5.949573 | 0.750505  | -0.660896 |
| C  | 2.225018  | -0.334126 | 1.746630 | H | -6.844048 | 0.406726  | -1.190312 |
| H  | 3.088320  | -0.041392 | 2.353328 | C | -5.809263 | 1.855809  | 0.136084  |

|   |           |            |           |                                                            |
|---|-----------|------------|-----------|------------------------------------------------------------|
| H | -6.570875 | 2.594177   | 0.407385  | E(GFN2-xTB) = -362.151672108256 Hartree                    |
| C | -4.429999 | 1.878441   | 0.581119  | E(GFN-FF) = -35.159254823016 Hartree                       |
| C | -3.879929 | 2.902293   | 1.376229  | E(M06/def2-TZVP) = -9172.839297263821 Hartree              |
| C | -2.549406 | 2.907463   | 1.843011  | E(PBE - D3(BJ)/def2-TZVP) = -9169.257329525668 Hartree     |
| C | -1.966116 | 3.986593   | 2.614028  | E(PBE0 - D3(BJ)/def2-TZVP) = -9169.494237510464 Hartree    |
| H | -2.483393 | 4.903427   | 2.911428  | E(PBEh-3c) = -9158.811205236058 Hartree                    |
| C | -0.661480 | 3.641680   | 2.854719  | E(PM6) = -563.74922 Kcal/mol                               |
| H | 0.098418  | 4.213587   | 3.397520  | E(PM7) = -664.41659 Kcal/mol                               |
| C | -0.450418 | 2.350125   | 2.235291  | E( $\omega$ B97X-V/def2-TZVP) = -9174.393707944870 Hartree |
| C | -5.503855 | -1.649349  | -2.248051 |                                                            |
| C | -6.606157 | -2.307264  | -1.667539 | Coordinates:                                               |
| C | -7.639323 | -2.828233  | -2.445889 | Cu 0.012696 -0.014547 0.616745                             |
| C | -7.640961 | -2.745256  | -3.863512 | C 2.282062 -2.498786 1.419456                              |
| C | -6.538479 | -2.071798  | -4.435096 | C 1.768209 -2.476909 0.110257                              |
| C | -5.495528 | -1.566087  | -3.649267 | C 2.179953 -3.387531 -0.938670                             |
| C | -8.737327 | -3.671761  | -5.935469 | H 2.952330 -4.156922 -0.838546                             |
| H | -9.798660 | -3.792037  | -6.239909 | C 1.425686 -3.083984 -2.041820                             |
| H | -8.331676 | -2.839918  | -6.540824 | H 1.457199 -3.549778 -3.032155                             |
| C | -7.992708 | -4.979053  | -6.276495 | C 0.567543 -1.976466 -1.670317                             |
| H | -8.109413 | -5.186064  | -7.363865 | C -0.343399 -1.360449 -2.551519                            |
| H | -8.460892 | -5.826122  | -5.735177 | C -1.088836 -0.208786 -2.231930                            |
| C | -5.401779 | -7.240874  | -4.939903 | C -2.043715 -0.413895 -3.128298                            |
| C | -4.139012 | -7.321598  | -5.548396 | H -2.319912 0.032354 -4.116419                             |
| H | -3.549718 | -6.407530  | -5.710735 | C -2.524254 1.528406 -2.493110                             |
| C | -3.646303 | -8.576635  | -5.918724 | H -3.266111 2.247260 -2.859788                             |
| H | -2.653720 | -8.648321  | -6.390609 | C -1.871716 1.573241 -1.198135                             |
| C | -4.391533 | -9.755163  | -5.688718 | C 3.349494 -3.478819 1.760378                              |
| C | -5.647697 | -9.639081  | -5.059535 | C 4.657106 -3.046858 2.061065                              |
| H | -6.234607 | -10.547653 | -4.852678 | C 5.659606 -3.938842 2.444257                              |
| C | -6.159456 | -8.390158  | -4.680003 | C 5.439450 -5.340442 2.511412                              |
| H | -7.128242 | -8.296516  | -4.168993 | C 4.122566 -5.771471 2.213270                              |
| C | -3.859007 | -11.096598 | -6.120956 | C 3.117747 -4.865036 1.845162                              |
| H | -4.039869 | -11.260569 | -7.205170 | C 6.312743 -7.332471 3.723754                              |
| H | -2.765031 | -11.171767 | -5.961603 | H 7.329679 -7.732933 3.900264                              |
| H | -4.348399 | -11.926992 | -5.576414 | H 5.721840 -8.128573 3.230194                              |
| C | -4.725387 | 4.089529   | 1.675022  | C 5.662089 -6.982607 5.083688                              |
| C | -5.071397 | 4.469322   | 2.985491  | H 4.563558 -6.875260 4.970718                              |
| C | -5.807346 | 5.630465   | 3.263684  | H 5.838122 -7.805030 5.805911                              |
| C | -6.241182 | 6.494462   | 2.230104  | C 7.918627 -4.182260 6.984154                              |
| C | -5.910107 | 6.094791   | 0.911273  | C 8.012792 -4.344300 8.374155                              |
| C | -5.178452 | 4.938686   | 0.644122  | H 8.023805 -5.357017 8.802008                              |
| C | -6.783160 | 8.539734   | 3.546463  | C 8.109728 -3.203570 9.177254                              |
| H | -7.583693 | 9.307987   | 3.503053  | H 8.194652 -3.318282 10.269251                             |
| H | -6.923672 | 7.987048   | 4.493070  | C 8.104392 -1.905191 8.617766                              |
| C | -5.406828 | 9.220063   | 3.552874  | C 8.004488 -1.782447 7.214697                              |
| H | -4.619452 | 8.439555   | 3.618693  | H 8.002581 -0.779355 6.760328                              |
| H | -5.293270 | 9.861220   | 4.456251  | C 7.922472 -2.911677 6.388233                              |
| C | -2.994055 | 8.862174   | 1.153220  | H 7.873160 -2.814802 5.293289                              |
| C | -1.926060 | 8.187154   | 1.757843  | C 8.193482 -0.695073 9.506386                              |
| H | -1.496452 | 8.584719   | 2.688622  | H 8.247310 0.245721 8.927218                               |
| C | -1.431196 | 7.022596   | 1.152545  | H 9.081108 -0.749686 10.169948                             |
| H | -0.594912 | 6.480648   | 1.618764  | H 7.297429 -0.623065 10.155304                             |
| C | -1.991630 | 6.522551   | -0.040642 | C -0.530886 -1.962556 -3.899091                            |
| C | -3.059951 | 7.238623   | -0.629936 | C -0.178133 -1.288167 -5.083134                            |
| H | -3.517355 | 6.859781   | -1.556101 | C -0.380512 -1.841715 -6.355928                            |
| C | -3.559109 | 8.407862   | -0.049594 | C -0.967170 -3.119794 -6.520643                            |
| H | -4.390706 | 8.959324   | -0.509741 | C -1.311795 -3.798733 -5.320942                            |
| C | -1.484379 | 5.253123   | -0.672160 | C -1.102416 -3.243003 -4.058996                            |
| H | -2.300237 | 4.506235   | -0.752013 | C -1.187802 -3.168846 -9.042359                            |
| H | -1.114778 | 5.439538   | -1.701812 | H -1.343228 -3.989380 -9.767550                            |
| H | -0.665789 | 4.800225   | -0.082253 | H -0.202356 -2.713012 -9.262669                            |
| N | -3.753733 | 0.783471   | 0.084885  | C -2.301060 -2.125617 -9.277513                            |
| N | -1.609380 | 1.923069   | 1.619597  | H -3.251306 -2.498751 -8.830040                            |
| N | -8.715060 | -3.296131  | -4.535426 | H -2.051830 -1.182392 -8.752892                            |
| H | -9.263365 | -3.903704  | -3.921974 | C -5.174490 -2.271099 -11.087061                           |
| N | -6.577230 | -4.973588  | -5.936779 | C -5.827827 -1.216536 -11.743364                           |
| H | -6.053199 | -4.114291  | -6.144155 | H -5.350973 -0.743201 -12.614008                           |
| N | -6.985803 | 7.647480   | 2.410521  | C -7.091221 -0.813660 -11.293283                           |
| H | -7.061229 | 8.163998   | 1.529570  | H -7.619615 -0.006090 -11.823560                           |
| N | -5.208044 | 9.946320   | 2.299824  | C -7.709973 -1.435765 -10.186645                           |
| H | -5.755017 | 10.815177  | 2.215771  | C -7.038423 -2.509628 -9.564572                            |
| S | -6.041864 | -5.633011  | -4.473567 | H -7.517071 -3.031200 -8.720945                            |
| S | -3.596524 | 10.379132  | 1.895238  | C -5.781704 -2.938842 -10.010798                           |
| F | -6.677576 | -2.435960  | -0.335645 | H -5.280533 -3.804449 -9.554425                            |
| F | -8.663914 | -3.479556  | -1.857573 | C -9.041956 -0.957356 -9.670106                            |
| F | -4.464713 | -0.983311  | -4.277174 | H -8.900323 -0.255114 -8.819798                            |
| F | -6.399144 | -1.994974  | -5.789342 | H -9.661589 -1.796022 -9.295431                            |
| F | -4.698860 | 3.704694   | 4.021492  | H -9.616030 -0.419803 -10.449747                           |
| F | -6.099069 | 5.907567   | 4.552902  | N 0.796643 -1.617493 -0.360000                             |
| F | -4.864175 | 4.669039   | -0.635399 | N -1.010405 0.505271 -1.055098                             |
| F | -6.286843 | 6.901426   | -0.106144 | N 6.481892 -6.178726 2.846065                              |
| O | -4.888891 | -4.795822  | -4.071943 | H 7.340306 -5.662170 3.086975                              |
| O | -7.208756 | -5.870292  | -3.590893 | N 6.131238 -5.729540 5.691361                              |
| O | -2.803952 | 10.625422  | 3.121778  | H 5.846257 -4.902426 5.146623                              |
| O | -3.758753 | 11.416037  | 0.856219  | N -1.202080 -3.755043 -7.716538                            |
|   |           |            |           | H -1.715921 -4.630284 -7.615977                            |
|   |           |            |           | N -2.457463 -1.827707 -10.697527                           |
|   |           |            |           | H -2.446461 -0.846623 -10.989558                           |
|   |           |            |           | S 7.823339 -5.632534 5.949579                              |
|   |           |            |           | S -3.525263 -2.748384 -11.626504                           |
|   |           |            |           | F 4.957424 -1.736168 2.023558                              |

Conformation 20.  
Multiplicity: 2  
Charge: 0  
E(B97-3c) = -9171.798942544761 Hartree  
E(GFN1-xTB) = -378.633762794353 Hartree

|   |           |           |            |                                                            |           |           |           |
|---|-----------|-----------|------------|------------------------------------------------------------|-----------|-----------|-----------|
| F | 6.886533  | -3.468284 | 2.763674   | F                                                          | -1.422094 | 4.670649  | -2.028105 |
| F | 1.897454  | -5.351218 | 1.580837   | F                                                          | -3.041031 | 6.641870  | -2.771888 |
| F | 3.817363  | -7.084785 | 2.272662   | F                                                          | -0.861762 | 0.084386  | 6.191880  |
| F | 0.381318  | -0.071718 | -5.015626  | F                                                          | -0.471687 | 1.006558  | 8.662711  |
| F | -0.017762 | -1.110657 | -7.437424  | F                                                          | 1.775242  | 3.609205  | 4.400101  |
| F | -1.473891 | -3.948548 | -2.982443  | F                                                          | 2.200119  | 4.545199  | 6.907216  |
| F | -1.887377 | -5.016974 | -5.438608  | O                                                          | -4.529434 | 3.635058  | -4.036859 |
| O | 8.539222  | -5.313965 | 4.680141   | O                                                          | -6.935851 | 4.397977  | -3.410470 |
| O | 8.179824  | -6.850248 | 6.705775   | O                                                          | 4.933995  | -0.053413 | 9.999988  |
| O | -3.350168 | -2.278025 | -13.011615 | O                                                          | 6.228049  | 2.175834  | 9.913537  |
| O | -3.317741 | -4.149764 | -11.202989 |                                                            |           |           |           |
| C | -2.124713 | 2.565429  | -0.233624  | Conformation 21.                                           |           |           |           |
| C | -1.583951 | 2.560049  | 1.065443   | Multiplicity: 2                                            |           |           |           |
| C | -1.870478 | 3.573731  | 2.060332   | Charge: 0                                                  |           |           |           |
| H | -2.501018 | 4.453306  | 1.893824   | E(B97-3c) = -9171.802089382092 Hartree                     |           |           |           |
| C | -1.215000 | 3.199325  | 3.204458   | E(GFN1-xTB) = -378.642672725431 Hartree                    |           |           |           |
| H | -1.206689 | 3.703213  | 4.176405   | E(GFN2-xTB) = -362.171421278556 Hartree                    |           |           |           |
| C | -0.516527 | 1.966278  | 2.900082   | E(GFN-FF) = -35.167560773366 Hartree                       |           |           |           |
| C | 0.263275  | 1.254329  | 3.829187   | E(M06/def2-TZVP) = -9172.841525071675 Hartree              |           |           |           |
| C | 0.950313  | 0.060824  | 3.532875   | E(PBE - D3(BJ)/def2-TZVP) = -9169.259429012684 Hartree     |           |           |           |
| C | 1.756298  | -0.667415 | 4.491385   | E(PBE0 - D3(BJ)/def2-TZVP) = -9169.498018702177 Hartree    |           |           |           |
| H | 1.889804  | -0.397374 | 5.543319   | E(PBEh-3c) = -9158.811838795891 Hartree                    |           |           |           |
| C | 2.321190  | -1.716804 | 3.813766   | E(PM6) = -560.49513 Kcal/mol                               |           |           |           |
| H | 2.984013  | -2.495549 | 4.205727   | E(PM7) = -670.89896 Kcal/mol                               |           |           |           |
| C | 1.867292  | -1.622773 | 2.441756   | E( $\omega$ B97X-V/def2-TZVP) = -9174.400127570754 Hartree |           |           |           |
| C | -3.043711 | 3.676829  | -0.608264  | Coordinates:                                               |           |           |           |
| C | -4.365523 | 3.746269  | -0.125185  | Cu                                                         | -0.021773 | -1.880249 | 0.667461  |
| C | -5.228661 | 4.774032  | -0.504407  | C                                                          | -2.905758 | -0.100785 | -0.052799 |
| C | -4.840382 | 5.803983  | -1.402080  | C                                                          | -1.730496 | 0.624439  | 0.214424  |
| C | -3.505151 | 5.740606  | -1.858921  | C                                                          | -1.634641 | 2.067697  | 0.118363  |
| C | -2.651645 | 4.690250  | -1.496544  | H                                                          | -2.431541 | 2.731861  | -0.234845 |
| C | -5.727780 | 7.692533  | -2.823025  | H                                                          | -0.357018 | 2.394856  | 0.491035  |
| H | -6.430879 | 8.526104  | -2.610797  | C                                                          | 0.101414  | 3.387730  | 0.532285  |
| H | -4.717990 | 8.140783  | -2.873004  | C                                                          | 0.327326  | 1.153320  | 0.796415  |
| C | -6.103181 | 7.095997  | -4.196300  | C                                                          | 1.672923  | 1.082764  | 1.209727  |
| H | -6.049199 | 7.901058  | -4.963273  | C                                                          | 2.378677  | -0.117465 | 1.389259  |
| H | -7.153965 | 6.741622  | -4.175640  | C                                                          | 3.752339  | -0.186804 | 1.844541  |
| C | -6.366334 | 3.838549  | -5.928705  | H                                                          | 4.365904  | 0.680312  | 2.111969  |
| C | -5.432086 | 3.455654  | -6.904731  | H                                                          | 4.092656  | -1.513748 | 1.884945  |
| H | -4.359073 | 3.463587  | -6.665567  | H                                                          | 5.041616  | -1.959475 | 2.204424  |
| C | -5.893643 | 3.051931  | -8.160637  | C                                                          | 2.920879  | -2.250928 | 1.447043  |
| H | -5.168883 | 2.744699  | -8.931268  | C                                                          | -4.121276 | 0.668288  | -0.436527 |
| C | -7.274821 | 3.022626  | -8.459413  | C                                                          | -4.622206 | 0.645012  | -1.748048 |
| C | -8.186438 | 3.391750  | -7.450118  | C                                                          | -5.721257 | 1.411665  | -2.151736 |
| H | -9.267182 | 3.355902  | -7.659175  | C                                                          | -6.388927 | 2.278443  | -1.255946 |
| C | -7.742942 | 3.798251  | -6.183127  | C                                                          | -5.891726 | 2.283517  | 0.073565  |
| H | -8.449960 | 4.069182  | -5.386444  | C                                                          | -4.788496 | 1.523769  | 0.463345  |
| C | -7.745726 | 2.619717  | -9.831947  | C                                                          | -7.824209 | 3.558652  | -2.872869 |
| H | -7.571107 | 3.438453  | -10.562633 | H                                                          | -8.884329 | 3.889622  | -2.852832 |
| H | -7.191952 | 1.733377  | -10.201056 | H                                                          | -7.774379 | 2.711799  | -3.580066 |
| H | -8.827969 | 2.386112  | -9.844713  | C                                                          | -6.968975 | 4.735365  | -3.394658 |
| C | 0.425581  | 1.815761  | 5.198741   | H                                                          | -7.268643 | 4.967285  | -4.440553 |
| C | -0.117134 | 1.188949  | 6.334045   | H                                                          | -7.178054 | 5.640971  | -2.791304 |
| C | 0.096465  | 1.672205  | 7.633161   | C                                                          | -3.696435 | 6.431302  | -2.554881 |
| C | 0.885717  | 2.822288  | 7.871196   | C                                                          | -4.292715 | 7.701280  | -2.548303 |
| C | 1.413130  | 3.459657  | 6.720470   | H                                                          | -5.333215 | 7.822422  | -2.214609 |
| C | 1.191317  | 2.974689  | 5.431451   | C                                                          | -3.526369 | 8.807858  | -2.934372 |
| C | 1.282165  | 2.556868  | 10.318705  | H                                                          | -3.982189 | 9.810382  | -2.919568 |
| H | 1.405266  | 3.256966  | 11.171475  | C                                                          | -2.172791 | 8.669052  | -3.308533 |
| H | 0.347557  | 1.996124  | 10.503684  | C                                                          | -1.602616 | 7.377469  | -3.297928 |
| C | 2.453240  | 1.565512  | 10.279017  | H                                                          | -0.536011 | 7.261073  | -3.543131 |
| H | 2.315369  | 0.874694  | 9.421187   | C                                                          | -2.354789 | 6.257793  | -2.927979 |
| H | 2.451155  | 0.933087  | 11.195294  | H                                                          | -1.904414 | 5.255863  | -2.887089 |
| C | 4.833829  | 1.373039  | 7.768032   | C                                                          | -1.335820 | 9.858708  | -3.695179 |
| C | 4.926059  | 0.167733  | 7.057510   | H                                                          | -1.782754 | 10.808348 | -3.341752 |
| H | 5.071309  | -0.775147 | 7.604050   | H                                                          | -1.239378 | 9.928230  | -4.800018 |
| C | 4.824172  | 0.199170  | 5.658674   | H                                                          | -0.308307 | 9.759676  | -3.291088 |
| H | 4.893441  | -0.737489 | 5.085427   | C                                                          | 2.353967  | 2.387599  | 1.437363  |
| C | 4.612423  | 1.409357  | 4.965379   | C                                                          | 1.945717  | 3.233215  | 2.483760  |
| C | 4.540806  | 2.606179  | 5.714851   | C                                                          | 2.386344  | 4.558834  | 2.584452  |
| H | 4.365685  | 3.559515  | 5.194195   | C                                                          | 3.226344  | 5.126344  | 1.597976  |
| C | 4.661513  | 2.600021  | 7.106849   | C                                                          | 3.707713  | 4.249022  | 0.596572  |
| H | 4.590309  | 3.532335  | 7.683547   | C                                                          | 3.278334  | 2.920613  | 0.516274  |
| C | 4.420336  | 1.435805  | 3.473613   | C                                                          | 2.526283  | 7.429905  | 1.966773  |
| H | 3.368636  | 1.697692  | 3.231819   | H                                                          | 2.576844  | 7.624734  | 3.057831  |
| H | 5.059702  | 2.207556  | 2.999261   | H                                                          | 1.510693  | 7.015940  | 1.781892  |
| H | 4.638270  | 0.456681  | 3.010574   | C                                                          | 2.647110  | 8.772972  | 1.258204  |
| N | -0.751422 | 1.592590  | 1.592590   | H                                                          | 1.800212  | 9.404668  | 1.615574  |
| N | 1.015458  | -0.549203 | 2.297302   | H                                                          | 3.588484  | 9.278627  | 1.562604  |
| N | -5.782148 | 6.766467  | -1.710134  | C                                                          | 0.055542  | 7.668551  | -0.351129 |
| H | -6.723435 | 6.460924  | -1.452350  | C                                                          | -0.686751 | 8.845741  | -0.182635 |
| N | -5.272446 | 5.975987  | -4.614113  | H                                                          | -0.272659 | 9.817284  | -0.491609 |
| H | -4.263095 | 6.059273  | -4.438146  | C                                                          | -1.974839 | 8.757351  | 0.360622  |
| N | 1.144996  | 3.368957  | 9.116488   | H                                                          | -2.570202 | 9.674096  | 0.491538  |
| H | 1.847460  | 4.109398  | 9.051167   | C                                                          | -2.537412 | 7.515183  | 0.726189  |
| N | 3.716483  | 2.275319  | 10.079425  | C                                                          | -1.761938 | 6.347932  | 0.541828  |
| H | 4.051877  | 2.802219  | 10.897903  | H                                                          | -2.184535 | 5.365350  | 0.803450  |
| S | -5.771586 | 4.385895  | -4.327425  | C                                                          | -0.472470 | 6.417417  | 0.007600  |
| S | 5.054323  | 1.354630  | 9.544276   | H                                                          | 0.134144  | 5.516148  | -0.159518 |
| F | -4.816622 | 2.807240  | 0.717096   | C                                                          | -3.933212 | 7.418529  | 1.276798  |
| F | -6.500672 | 4.788184  | -0.053310  |                                                            |           |           |           |

|   |           |            |           |                                                         |           |           |           |
|---|-----------|------------|-----------|---------------------------------------------------------|-----------|-----------|-----------|
| H | -3.932232 | 6.938040   | 2.277049  | H                                                       | -1.717396 | -2.999323 | -4.464020 |
| H | -4.569169 | 6.788299   | 0.619842  | H                                                       | -2.581171 | -2.257283 | -3.074130 |
| H | -4.406525 | 8.414274   | 1.372463  | N                                                       | 0.479694  | -3.846118 | 0.699162  |
| N | -0.522266 | 0.086436   | 0.607064  | N                                                       | -1.934509 | -2.374476 | 0.185718  |
| N | 1.886622  | -1.385160  | 1.160247  | N                                                       | 7.645380  | -6.629192 | 2.605759  |
| N | -7.469561 | 3.090491   | -1.546562 | H                                                       | 7.575242  | -6.927001 | 3.581826  |
| H | -7.632920 | 3.771205   | -0.799806 | N                                                       | 9.096521  | -3.942048 | 2.537772  |
| N | -5.530405 | 4.515643   | -3.348615 | H                                                       | 8.699203  | -3.774188 | 1.604777  |
| H | -5.170729 | 3.632408   | -3.728872 | N                                                       | -4.712793 | -9.416826 | -1.715835 |
| N | 3.554959  | 6.474198   | 1.558671  | H                                                       | -4.402883 | -9.630261 | -2.667627 |
| H | 3.961546  | 6.711943   | 0.646987  | N                                                       | -6.604085 | -8.320485 | -3.682032 |
| N | 2.694577  | 8.679409   | -0.203986 | H                                                       | -6.993334 | -9.099187 | -4.232545 |
| H | 2.802415  | 9.576824   | -0.688340 | S                                                       | 8.066106  | -3.300122 | -3.717939 |
| S | -4.628730 | 5.007463   | -2.006917 | S                                                       | -7.039712 | -6.899906 | -4.543300 |
| S | 1.659485  | 7.711484   | -1.149979 | F                                                       | 3.210898  | -5.304855 | 3.654616  |
| F | -4.028342 | -0.121745  | -2.682775 | F                                                       | 5.491070  | -6.657383 | 4.208789  |
| F | -6.050588 | 1.386274   | -3.472159 | F                                                       | 5.218588  | -3.606281 | -0.300683 |
| F | -4.360780 | 1.623861   | 1.728831  | F                                                       | 7.462051  | -4.921526 | 0.222129  |
| F | -6.486552 | 3.107517   | 0.961172  | F                                                       | -3.847803 | -6.019028 | 1.610583  |
| F | 1.079498  | 2.784196   | 3.403516  | F                                                       | -5.299670 | -8.101159 | 0.794094  |
| F | 1.962217  | 5.304235   | 3.629051  | F                                                       | -1.101462 | -6.355280 | -2.256947 |
| F | 3.704704  | 2.169015   | -0.508032 | F                                                       | -2.574196 | -8.460068 | -3.101719 |
| F | 4.533006  | 4.748965   | -0.341409 | O                                                       | 7.007579  | -2.591757 | 2.964613  |
| O | -3.654877 | 3.926792   | -1.729694 | O                                                       | 7.771987  | -4.346456 | 4.726265  |
| O | -5.596076 | 5.484946   | -0.981806 | O                                                       | -8.235385 | -6.269128 | -3.936902 |
| O | 1.559352  | 8.466871   | -2.423373 | O                                                       | -7.030693 | -7.329862 | -5.956757 |
| O | 2.177990  | 6.329647   | -1.133478 |                                                         |           |           |           |
| C | 2.872901  | -3.653706  | 1.341886  | Conformation 29.                                        |           |           |           |
| C | 1.721474  | -4.377894  | 0.975676  | Multiplicity: 2                                         |           |           |           |
| C | 1.685005  | -5.821259  | 0.848419  | Charge: 0                                               |           |           |           |
| C | 2.539109  | -6.488072  | 1.005770  | E(B97-3c) = -9171.809104614103 Hartree                  |           |           |           |
| C | 0.401837  | -6.155482  | 0.502328  | E(GFN1-xTB) = -378.648897551350 Hartree                 |           |           |           |
| H | -0.015797 | -7.153636  | 0.333881  | E(GFN2-xTB) = -362.172770499308 Hartree                 |           |           |           |
| C | -0.341625 | -4.915310  | 0.407124  | E(GFN-FF) = -35.184973048727 Hartree                    |           |           |           |
| C | -1.708910 | -4.844921  | 0.082698  | E(M06/def2-TZVP) = -9172.850888596924 Hartree           |           |           |           |
| C | -2.445787 | -3.644199  | 0.016242  | E(PBE - D3(BJ)/def2-TZVP) = -9169.266976840323 Hartree  |           |           |           |
| C | -3.859876 | -3.573246  | -0.294029 | E(PBE0 - D3(BJ)/def2-TZVP) = -9169.504437265598 Hartree |           |           |           |
| H | -4.511884 | -4.427393  | -0.497541 | E(PBEh-3c) = -9158.820500071699 Hartree                 |           |           |           |
| C | -4.197664 | -2.245029  | -0.298160 | E(PM6) = -565.65965 Kcal/mol                            |           |           |           |
| H | -5.180312 | -1.797434  | -0.480916 | E(PM7) = -678.72587 Kcal/mol                            |           |           |           |
| C | -2.984404 | -1.505194  | -0.027243 | E(ωB97X-V/def2-TZVP) = -9174.407289092167 Hartree       |           |           |           |
| C | 4.114964  | -4.419269  | 1.640493  |                                                         |           |           |           |
| C | 4.235699  | -5.217811  | 2.795870  | Coordinates:                                            |           |           |           |
| C | 5.401400  | -5.930217  | 3.075657  | Cu                                                      | -0.702032 | -0.611871 | -1.622842 |
| C | 6.541665  | -5.886314  | 2.230939  | C                                                       | 1.465364  | 2.077746  | -1.448617 |
| C | 6.406743  | -5.095205  | 1.068518  | C                                                       | 0.747292  | 1.730773  | -0.287205 |
| C | 5.239298  | -4.369172  | 0.800947  | C                                                       | 0.897217  | 2.399331  | 0.990755  |
| C | 9.001075  | -6.430510  | 2.132120  | H                                                       | 1.573897  | 3.234501  | 1.196557  |
| H | 9.582230  | -7.348434  | 2.363492  | C                                                       | 0.057473  | 1.768776  | 1.872089  |
| H | 8.990194  | -6.338094  | 1.030232  | H                                                       | -0.101198 | 2.010070  | 2.929371  |
| C | 9.745057  | -5.228144  | 2.750379  | C                                                       | -0.599122 | 0.708586  | 1.128935  |
| H | 10.777116 | -5.192355  | 2.335201  | C                                                       | -1.566260 | -0.152058 | 1.684147  |
| H | 9.843398  | -5.373064  | 3.845387  | C                                                       | -2.282641 | -1.112133 | 0.952132  |
| C | 9.066700  | -2.055166  | 4.531039  | C                                                       | -3.384049 | -1.886592 | 1.488020  |
| C | 9.274438  | -0.822508  | 3.890196  | H                                                       | -3.763129 | -1.807712 | 2.512667  |
| H | 8.814038  | -0.629643  | 2.910401  | C                                                       | -3.847180 | -2.678724 | 0.469336  |
| C | 10.053526 | 0.147301   | 4.526948  | H                                                       | -4.694657 | -3.373968 | 0.483605  |
| H | 10.216653 | 1.117708   | 4.032030  | C                                                       | -2.992027 | -2.416532 | -0.675000 |
| C | 10.625665 | -0.088692  | 5.798211  | C                                                       | 2.409886  | 3.221540  | -1.332598 |
| C | 10.385658 | -1.330782  | 6.418270  | C                                                       | 3.805248  | 3.039227  | -1.281597 |
| H | 10.809919 | -1.527851  | 7.415192  | C                                                       | 4.676680  | 4.089146  | -0.991246 |
| C | 9.607013  | -2.317717  | 5.795770  | C                                                       | 4.213969  | 5.388114  | -0.654452 |
| H | 9.398619  | -3.279610  | 6.285469  | C                                                       | 2.816241  | 5.587567  | -0.784806 |
| C | 11.465362 | 0.970177   | 6.464351  | C                                                       | 1.951211  | 4.529394  | -1.092884 |
| H | 12.386688 | 1.174738   | 5.879345  | C                                                       | 4.729697  | 7.453422  | 0.614724  |
| H | 10.914996 | 1.930574   | 6.539356  | H                                                       | 4.039487  | 8.112195  | 0.055297  |
| H | 11.771870 | 0.669790   | 7.484393  | H                                                       | 5.645394  | 8.042142  | 0.822542  |
| C | -2.420414 | -6.098975  | -0.288257 | C                                                       | 4.054669  | 7.058816  | 1.953333  |
| C | -3.505937 | -6.600964  | 0.452425  | H                                                       | 3.321682  | 7.843665  | 2.234967  |
| C | -4.272195 | -7.692323  | 0.018230  | H                                                       | 3.457813  | 6.132254  | 1.811718  |
| C | -3.994783 | -8.347147  | -1.204980 | C                                                       | 5.107196  | 4.152973  | 3.302217  |
| C | -2.869306 | -7.869400  | -1.920641 | C                                                       | 4.423413  | 3.874592  | 4.495751  |
| C | -2.111686 | -6.784202  | -1.480113 | H                                                       | 4.480670  | 4.574176  | 5.339668  |
| C | -6.162764 | -9.506538  | -1.576282 | C                                                       | 3.685572  | 2.689649  | 4.590379  |
| H | -6.470202 | -10.479853 | -2.013238 | H                                                       | 3.144847  | 2.456647  | 5.520208  |
| H | -6.437936 | -9.538209  | -0.506046 | C                                                       | 3.616174  | 1.778826  | 3.513154  |
| C | -6.929855 | -8.364096  | -2.257685 | C                                                       | 4.315053  | 2.090353  | 2.325833  |
| H | -6.616765 | -7.397225  | -1.810056 | H                                                       | 4.272546  | 1.400154  | 1.468641  |
| H | -8.021501 | -8.464178  | -2.060590 | C                                                       | 5.072369  | 3.263940  | 2.217187  |
| C | -5.637759 | -5.833221  | -4.218019 | H                                                       | 5.648941  | 3.486766  | 1.311184  |
| C | -5.867906 | -4.535996  | -3.739435 | C                                                       | 2.842029  | 0.497779  | 3.645756  |
| H | -6.897789 | -4.217762  | -3.522775 | H                                                       | 2.166775  | 0.513503  | 4.521497  |
| C | -4.773366 | -3.681805  | -3.540349 | H                                                       | 3.532136  | -0.363384 | 3.774695  |
| H | -4.935037 | -2.661054  | -3.163694 | C                                                       | 2.234144  | 0.294431  | 2.743487  |
| C | -3.455430 | -4.111381  | -3.799037 | C                                                       | -1.799134 | 0.004714  | 3.147830  |
| C | -3.262707 | -5.419929  | -4.299669 | C                                                       | -2.850285 | 0.767620  | 3.677978  |
| H | -2.241225 | -5.777366  | -4.496906 | C                                                       | -2.910386 | 1.113864  | 5.036472  |
| C | -4.341757 | -6.279730  | -4.521758 | C                                                       | -1.885576 | 0.743630  | 5.937456  |
| H | -4.182789 | -7.300889  | -4.894210 | C                                                       | -0.865263 | -0.087330 | 5.408750  |
| C | -2.274463 | -3.217361  | -3.528899 | C                                                       | -0.823733 | -0.439037 | 4.061401  |
| H | -1.562260 | -3.715111  | -2.839587 | C                                                       | -2.520351 | 2.222680  | 7.858164  |



|   |            |           |            |                                                         |           |           |            |
|---|------------|-----------|------------|---------------------------------------------------------|-----------|-----------|------------|
| H | -2.319969  | 2.194396  | 8.950466   | H                                                       | 3.258934  | -1.355375 | -10.896838 |
| H | -3.610700  | 2.074283  | 7.733790   | C                                                       | 5.068798  | -1.154683 | -9.722951  |
| C | -2.153547  | 3.614464  | 7.308289   | H                                                       | 4.587737  | -0.553236 | -8.923072  |
| H | -2.324876  | 3.651401  | 6.214312   | H                                                       | 5.503897  | -0.427587 | -10.445703 |
| H | -2.823251  | 4.376175  | 7.761914   | C                                                       | 6.125336  | -1.388159 | -6.443976  |
| C | 1.646018   | 4.744257  | 6.582220   | C                                                       | 5.912901  | -0.226630 | -5.689409  |
| C | 2.669548   | 4.748064  | 7.542056   | H                                                       | 6.304978  | 0.732547  | -6.056924  |
| H | 2.740137   | 3.928694  | 8.271885   | C                                                       | 5.199716  | -0.320563 | -4.485258  |
| C | 3.611006   | 5.784547  | 7.519733   | H                                                       | 5.024406  | 0.581888  | -3.881212  |
| H | 4.428412   | 5.786634  | 8.257326   | C                                                       | 4.688778  | -1.554583 | -4.033395  |
| C | 3.556021   | 6.805104  | 6.545235   | C                                                       | 4.931895  | -2.708017 | -4.814854  |
| C | 2.506560   | 6.772117  | 5.601349   | H                                                       | 4.527065  | -3.677213 | -4.487621  |
| H | 2.453206   | 7.553542  | 4.828814   | C                                                       | 5.654704  | -2.635720 | -6.008993  |
| C | 1.550054   | 5.750438  | 5.610018   | H                                                       | 5.829620  | -3.535316 | -6.617532  |
| H | 0.747723   | 5.708198  | 4.859645   | C                                                       | 3.886591  | -1.650035 | -2.762489  |
| H | 4.641815   | 7.843225  | 6.472154   | H                                                       | 2.892232  | -2.097466 | -2.964169  |
| H | 4.323124   | 8.730977  | 5.892156   | H                                                       | 4.390577  | -2.304775 | -2.021123  |
| H | 5.534831   | 7.405590  | 5.974444   | H                                                       | 3.729861  | -0.657293 | -2.301302  |
| H | 4.956532   | 8.178808  | 7.480179   | N                                                       | -1.202669 | -1.954571 | -3.051442  |
| N | -0.165492  | 0.703773  | -0.179375  | N                                                       | 0.638096  | 0.238443  | -2.893247  |
| N | -2.066118  | -1.441579 | -0.368576  | N                                                       | -7.146875 | -7.134692 | -2.547975  |
| N | 5.122574   | 6.337831  | -0.237754  | H                                                       | -7.936280 | -6.693674 | -3.031115  |
| H | 6.017905   | 5.923136  | 0.049169   | N                                                       | -7.581170 | -6.889870 | 0.474347   |
| N | 4.904744   | 6.868662  | 3.125087   | H                                                       | -6.580758 | -7.065020 | 0.630569   |
| H | 5.366351   | 7.720813  | 3.470857   | N                                                       | 3.330703  | -2.954526 | -9.519884  |
| N | -1.799105  | 1.108714  | 7.268354   | H                                                       | 3.934955  | -3.737420 | -9.256565  |
| H | -0.855638  | 0.956521  | 7.638742   | N                                                       | 6.071507  | -2.011569 | -9.093388  |
| N | -0.776032  | 4.042026  | 7.549636   | H                                                       | 6.697870  | -2.492830 | -9.754373  |
| H | -0.473537  | 3.974813  | 8.530949   | S                                                       | -7.859257 | -5.224471 | 0.360898   |
| S | 6.091294   | 5.641614  | 3.183716   | S                                                       | 7.110848  | -1.283313 | -7.937082  |
| S | 0.461162   | 3.404423  | 6.564403   | F                                                       | -5.339619 | -2.875969 | -3.604679  |
| F | 4.332681   | 1.809850  | -1.450129  | F                                                       | -7.238983 | -4.793576 | -3.858437  |
| F | 6.002456   | 3.843784  | -0.885089  | F                                                       | -3.050569 | -5.606240 | -0.463530  |
| F | 0.637106   | 4.788008  | -1.126439  | F                                                       | -4.900629 | -7.495888 | -0.694566  |
| F | 2.268840   | 6.801053  | -0.541393  | F                                                       | 0.334151  | 0.112851  | -7.287551  |
| F | -3.814997  | 1.226821  | 2.868110   | F                                                       | 1.690647  | -0.568331 | -9.479721  |
| F | -3.942181  | 1.891292  | 5.447151   | F                                                       | 1.971218  | -3.733351 | -5.021102  |
| F | 0.209965   | -1.175965 | 3.623377   | F                                                       | 3.361515  | -4.429616 | -7.235818  |
| F | 0.129211   | -0.476786 | 6.234002   | O                                                       | -6.557270 | -4.592824 | 0.670666   |
| O | 6.792494   | 5.907777  | 4.459399   | O                                                       | -8.614532 | -4.940581 | -0.882664  |
| O | 6.873560   | 5.572725  | 1.920049   | O                                                       | 7.307484  | 0.151995  | -8.246337  |
| O | 1.108908   | 2.242253  | 7.235249   | O                                                       | 8.252403  | -2.217070 | -7.853423  |
| O | -0.114043  | 3.273660  | 5.206317   |                                                         |           |           |            |
| C | -3.070076  | -3.116849 | -1.893540  | Conformation 6.                                         |           |           |            |
| C | -2.195972  | -2.907350 | -2.978998  | Multiplicity: 2                                         |           |           |            |
| C | -2.204100  | -3.709811 | -4.186232  | Charge: 0                                               |           |           |            |
| H | -2.891995  | -4.538224 | -4.384654  | E(B97-3c) = -9171.783331992496 Hartree                  |           |           |            |
| C | -1.197019  | -3.233461 | -4.984993  | E(GFN1-xTB) = -378.619697312255 Hartree                 |           |           |            |
| H | -0.901727  | -3.578069 | -5.981678  | E(GFN2-xTB) = -362.139681941343 Hartree                 |           |           |            |
| C | -0.581800  | -2.133863 | -4.269398  | E(GFN-FF) = -35.156845141281 Hartree                    |           |           |            |
| C | 0.462057   | -1.347405 | -4.792004  | E(M06/def2-TZVP) = -9172.826593199343 Hartree           |           |           |            |
| C | 0.983590   | -0.204082 | -4.152868  | E(PBE - D3(BJ)/def2-TZVP) = -9169.240990988814 Hartree  |           |           |            |
| C | 1.978628   | 0.676116  | -4.733009  | E(PBE0 - D3(BJ)/def2-TZVP) = -9169.477401680941 Hartree |           |           |            |
| H | 2.446366   | 0.550888  | -5.713524  | E(PBEh-3c) = -9158.794055561842 Hartree                 |           |           |            |
| C | 2.211167   | 1.668482  | -3.816577  | E(PM6) = -559.99684 Kcal/mol                            |           |           |            |
| H | 2.888646   | 2.524653  | -3.903108  | E(PM7) = -654.20383 Kcal/mol                            |           |           |            |
| C | 1.399495   | 1.363910  | -2.657808  | E(omegaB97X-V/def2-TZVP) = -9174.376911653364 Hartree   |           |           |            |
| C | -4.109683  | -4.173154 | -2.036523  |                                                         |           |           |            |
| C | -5.210560  | -4.009003 | -2.901565  | Coordinates:                                            |           |           |            |
| C | -6.180101  | -5.000047 | -3.048389  | Cu                                                      | 1.158085  | 1.302710  | 0.488472   |
| C | -6.130613  | -6.224129 | -2.330961  | C                                                       | -0.204117 | 0.986277  | -2.680991  |
| C | -5.014326  | -6.388189 | -1.481635  | C                                                       | 0.377656  | -0.154754 | -2.095309  |
| C | -4.052568  | -5.382316 | -1.325256  | C                                                       | 0.378358  | -1.467913 | -2.780029  |
| C | -7.507753  | -8.226607 | -1.665233  | H                                                       | -0.087215 | -1.715780 | -3.667206  |
| H | -8.138815  | -8.936488 | -2.240946  | C                                                       | 1.045146  | -2.303218 | -1.850522  |
| H | -6.593760  | -8.780455 | -1.381025  | H                                                       | 1.240999  | -3.374215 | -1.964159  |
| C | -8.285858  | -7.819563 | -0.396542  | C                                                       | 1.445355  | -1.501051 | -0.712644  |
| H | -8.541472  | -8.738555 | 0.177149   | C                                                       | 2.163357  | -2.006208 | 0.387906   |
| H | -9.245144  | -7.342814 | -0.683532  | C                                                       | 2.509285  | -1.244726 | 1.520151   |
| C | -8.963196  | -4.882630 | 1.731271   | C                                                       | 3.325816  | -1.742566 | 2.610081   |
| C | -8.436967  | -4.816132 | 3.031488   | H                                                       | 3.766982  | -2.743420 | 2.659464   |
| H | -7.358082  | -4.953361 | 3.193198   | C                                                       | 3.451480  | -0.722121 | 3.515737   |
| C | -9.302174  | -4.554695 | 4.097907   | H                                                       | 4.019244  | -0.717826 | 4.453685   |
| H | -8.896280  | -4.495124 | 5.120012   | C                                                       | 2.702932  | 0.397611  | 2.975990   |
| C | -10.685557 | -4.353244 | 3.888678   | C                                                       | -0.830376 | 0.855205  | -4.025262  |
| C | -11.176942 | -4.409561 | 2.568990   | C                                                       | -0.075286 | 0.578240  | -5.180579  |
| H | -12.248321 | -4.235248 | 2.383519   | C                                                       | -0.654099 | 0.476868  | -6.453810  |
| C | -10.325754 | -4.670841 | 1.485661   | C                                                       | -2.041426 | 0.687143  | -6.660633  |
| H | -10.699371 | -4.694128 | 0.452115   | C                                                       | -2.798920 | 0.963298  | -5.489551  |
| C | -11.606483 | -4.098162 | 5.053479   | C                                                       | -2.215452 | 1.031973  | -4.223325  |
| H | -11.821486 | -5.041610 | 5.599696   | C                                                       | -2.105797 | 0.984548  | -9.142993  |
| H | -11.152975 | -3.399754 | 5.785029   | H                                                       | -1.038130 | 0.703310  | -9.150737  |
| H | -12.576153 | -3.676751 | 4.725779   | H                                                       | -2.135980 | 2.095439  | -9.290403  |
| C | 1.099953   | -1.777597 | -6.066267  | C                                                       | -2.775604 | 0.308113  | -10.343141 |
| C | 1.064958   | -1.010566 | -7.244318  | H                                                       | -2.162450 | 0.507666  | -11.247303 |
| C | 1.780728   | -1.369597 | -8.395821  | H                                                       | -2.803920 | -0.791062 | -10.199470 |
| C | 2.588566   | -2.530880 | -8.429918  | C                                                       | -6.802136 | -6.802136 | -10.805023 |
| C | 2.586875   | -3.320558 | -7.253417  | C                                                       | -7.736042 | 1.340898  | -10.426258 |
| C | 1.869310   | -2.957729 | -6.114331  | H                                                       | -7.601908 | 1.881072  | -9.477789  |
| C | 4.001692   | -2.016258 | -10.413108 | C                                                       | -8.829344 | 1.590465  | -11.269448 |
| H | 4.467218   | -2.617366 | -11.222200 | H                                                       | -9.570761 | 2.351568  | -10.980613 |

|   |            |            |            |                                                            |           |           |           |
|---|------------|------------|------------|------------------------------------------------------------|-----------|-----------|-----------|
| C | -8.998854  | 0.882737   | -12.476069 | C                                                          | 9.627836  | -2.935844 | 7.841073  |
| C | -8.039548  | -0.098153  | -12.820765 | H                                                          | 10.698142 | -2.773048 | 8.042502  |
| H | -8.159211  | -0.666646  | -13.756187 | C                                                          | 8.775615  | -1.828462 | 7.718015  |
| C | -6.944608  | -0.364305  | -11.994966 | H                                                          | 9.151855  | -0.799345 | 7.806214  |
| H | -6.203060  | -1.132746  | -12.256583 | C                                                          | 10.054443 | -5.441050 | 7.857630  |
| C | -10.173433 | 1.148037   | -13.381117 | H                                                          | 9.808140  | -6.013947 | 8.776807  |
| H | -9.837502  | 1.421500   | -14.402564 | H                                                          | 9.949634  | -6.143841 | 7.005942  |
| H | -10.811993 | 1.967195   | -12.999766 | H                                                          | 11.116600 | -5.137693 | 7.925181  |
| H | -10.807332 | 0.243046   | -13.485538 | C                                                          | -0.572430 | 5.927140  | 0.760236  |
| C | 2.607855   | -3.426702  | 0.348323   | C                                                          | -0.209967 | 7.020855  | -0.046303 |
| C | 3.607473   | -3.864275  | -0.544815  | C                                                          | -0.885493 | 8.249280  | 0.005685  |
| C | 4.068634   | -5.181317  | -0.536994  | C                                                          | -1.980281 | 8.452316  | 0.878458  |
| C | 3.562999   | -6.161153  | 0.359008   | C                                                          | -2.315463 | 7.359671  | 1.715704  |
| C | 2.537958   | -5.726455  | 1.233833   | C                                                          | -1.638504 | 6.142345  | 1.657175  |
| C | 2.087207   | -4.397535  | 1.223149   | C                                                          | -3.005386 | 10.469045 | -0.162271 |
| C | 3.724146   | -8.584770  | 1.079761   | H                                                          | -3.526911 | 11.370153 | 0.223276  |
| H | 3.507981   | -8.305476  | 2.127938   | H                                                          | -2.068497 | 10.822076 | -0.631586 |
| H | 4.597782   | -9.271354  | 1.107468   | C                                                          | -3.870023 | 9.776982  | -1.225867 |
| C | 2.511810   | -9.331086  | 0.500172   | H                                                          | -3.325924 | 8.889593  | -1.611795 |
| H | 1.627130   | -8.662340  | 0.549149   | H                                                          | -4.023770 | 10.453625 | -2.096797 |
| H | 2.684103   | -9.575452  | -0.573533  | C                                                          | -5.249714 | 6.618679  | -1.040173 |
| C | -0.438365  | -10.451465 | 1.718977   | C                                                          | -4.785267 | 5.749710  | -2.036683 |
| C | -1.311388  | -9.673221  | 0.949620   | H                                                          | -4.859028 | 6.054049  | -3.090436 |
| H | -1.209652  | -9.672475  | -0.145087  | C                                                          | -4.237596 | 4.514574  | -1.659941 |
| C | -2.298892  | -8.920252  | 1.601659   | H                                                          | -3.872539 | 3.818381  | -2.429732 |
| H | -2.987993  | -8.301184  | 1.006352   | C                                                          | -4.138071 | 4.144590  | -0.302844 |
| C | -2.425704  | -8.942546  | 3.004696   | C                                                          | -4.630133 | 5.040132  | 0.675236  |
| C | -1.533545  | -9.749213  | 3.748816   | H                                                          | -4.550837 | 4.773821  | 1.739863  |
| H | -1.623408  | -9.781928  | 4.846226   | C                                                          | -5.195103 | 6.267574  | 0.318319  |
| C | -0.542022  | -10.505515 | 3.118155   | H                                                          | -5.566061 | 6.963364  | 1.083391  |
| H | 0.150015   | -11.138110 | 3.692336   | C                                                          | -3.503920 | 2.841933  | 0.105508  |
| C | -3.494540  | -8.143717  | 3.703973   | H                                                          | -2.607610 | 3.026952  | 0.733040  |
| H | -3.077438  | -7.576453  | 4.560616   | H                                                          | -4.202220 | 2.233344  | 0.716231  |
| H | -4.283003  | -8.810602  | 4.113315   | H                                                          | -3.191331 | 2.245759  | -0.771421 |
| H | -3.983863  | -7.425733  | 3.018636   | N                                                          | 1.287646  | 2.803730  | 1.851885  |
| N | 1.021767   | -0.199444  | -0.876262  | N                                                          | 0.179570  | 2.548321  | -0.784300 |
| N | 2.147388   | 0.063828   | 1.757792   | N                                                          | 5.074688  | 2.354094  | 8.769782  |
| N | -2.694564  | 0.600135   | -7.870747  | H                                                          | 5.984268  | 2.795029  | 8.613508  |
| H | -3.711288  | 0.760205   | -7.798284  | N                                                          | 5.452690  | -0.679342 | 8.783829  |
| N | -4.144876  | 0.738601   | -10.647257 | H                                                          | 4.447674  | -0.784673 | 8.596233  |
| H | -4.270570  | 1.760477   | -10.633068 | N                                                          | -2.702032 | 9.629570  | 0.992170  |
| N | 4.119328   | -7.418916  | 0.318432   | H                                                          | -3.520656 | 9.487265  | 1.589854  |
| H | 4.755292   | -7.563414  | -0.465467  | N                                                          | -5.120504 | 9.308577  | -0.631544 |
| N | 2.231462   | -10.507039 | 1.318503   | H                                                          | -5.789379 | 10.055583 | -0.396101 |
| H | 3.000861   | -11.191589 | 1.358745   | S                                                          | 6.306406  | -0.645648 | 7.322320  |
| S | -5.406115  | 0.025221   | -9.741313  | S                                                          | -6.028120 | 8.157119  | -1.525861 |
| S | 0.836056   | -11.409799 | 0.901627   | F                                                          | 4.875972  | 3.266674  | 4.118554  |
| F | 1.249260   | 0.393211   | -5.082467  | F                                                          | 6.015937  | 3.550206  | 6.559350  |
| F | 0.156342   | 0.164625   | -7.490835  | F                                                          | 1.664775  | 0.313768  | 5.997056  |
| F | -3.016500  | 1.306205   | -3.175177  | F                                                          | 2.766977  | 0.574457  | 8.397668  |
| F | -4.122672  | 1.169464   | -5.624888  | F                                                          | 0.809369  | 6.905832  | -0.909977 |
| F | 4.151761   | -3.001827  | -1.412895  | F                                                          | -0.467255 | 9.245240  | -0.805684 |
| F | 5.040228   | -5.566468  | -1.396592  | F                                                          | -2.061349 | 5.139675  | 2.446236  |
| F | 1.120766   | -4.062826  | 2.088971   | F                                                          | -3.365705 | 7.505436  | 2.555774  |
| F | 1.952331   | -6.594990  | 2.091687   | O                                                          | 5.303639  | -0.965150 | 6.282016  |
| O | -5.624496  | 0.770264   | -8.468574  | O                                                          | 7.151917  | 0.571338  | 7.274961  |
| O | -5.121667  | -1.422840  | -9.723486  | O                                                          | -5.803579 | 8.335880  | -2.979362 |
| O | 0.586640   | -11.339457 | -0.556527  | O                                                          | -7.381350 | 8.243490  | -0.939683 |
| O | 1.014770   | -12.701115 | 1.595753   |                                                            |           |           |           |
| C | 2.579568   | 1.639540   | 3.625524   | Conformation 7.                                            |           |           |           |
| C | 1.896276   | 2.747004   | 3.087348   | Multiplicity: 2                                            |           |           |           |
| C | 1.736035   | 4.009033   | 3.781703   | Charge: 0                                                  |           |           |           |
| H | 2.120974   | 4.230611   | 4.782349   | E(B97-3c) = -9171.803486829018 Hartree                     |           |           |           |
| C | 1.025030   | 4.831169   | 2.947564   | E(GFN1-xTB) = -378.640401965703 Hartree                    |           |           |           |
| H | 0.722730   | 5.869543   | 3.118847   | E(GFN2-xTB) = -362.163082368337 Hartree                    |           |           |           |
| C | 0.747753   | 4.068081   | 1.747206   | E(GFN-FF) = -35.179162942748 Hartree                       |           |           |           |
| C | 0.048850   | 4.579908   | 0.638560   | E(M06/def2-TZVP) = -9172.845246462613 Hartree              |           |           |           |
| C | -0.168932  | 3.863657   | -0.555562  | E(PBE - D3(BJ)/def2-TZVP) = -9169.262780436151 Hartree     |           |           |           |
| C | -0.828303  | 4.413385   | -1.722206  | E(PBE0 - D3(BJ)/def2-TZVP) = -9169.500659815854 Hartree    |           |           |           |
| H | -1.225747  | 5.428270   | -1.809323  | E(PBEh-3c) = -9158.815402316801 Hartree                    |           |           |           |
| C | -0.857598  | 3.419745   | -2.664476  | E(PM6) = -559.75136 Kcal/mol                               |           |           |           |
| H | -1.258960  | 3.470531   | -3.681775  | E(PM7) = -669.94150 Kcal/mol                               |           |           |           |
| C | -0.257930  | 2.249100   | -2.058078  | E( $\omega$ B97X-V/def2-TZVP) = -9174.402940799999 Hartree |           |           |           |
| C | 3.208878   | 1.796857   | 4.965619   |                                                            |           |           |           |
| C | 4.337561   | 2.618553   | 5.160100   | Coordinates:                                               |           |           |           |
| C | 4.916227   | 2.781677   | 6.417844   | Cu                                                         | -0.243331 | 0.800155  | 1.417999  |
| C | 4.421944   | 2.122268   | 7.573990   | C                                                          | 1.546945  | 2.596664  | -0.936514 |
| C | 3.284013   | 1.310146   | 7.372060   | C                                                          | 1.672841  | 1.194213  | -0.943973 |
| C | 2.716728   | 1.137365   | 6.103116   | C                                                          | 2.485377  | 0.459077  | -1.891966 |
| C | 5.005982   | 1.512936   | 9.948508   | H                                                          | 3.068480  | 0.902856  | -2.705289 |
| H | 5.376048   | 2.104444   | 10.812764  | C                                                          | 2.379680  | -0.865287 | -1.558025 |
| H | 3.947240   | 1.275806   | 10.162484  | H                                                          | 2.873322  | -1.720274 | -2.031010 |
| C | 5.827410   | 0.208746   | 9.875386   | C                                                          | 1.489825  | -0.940172 | -0.416518 |
| H | 5.727990   | -0.333508  | 10.842542  | C                                                          | 1.149578  | -2.142218 | 0.235994  |
| H | 6.902858   | 0.450850   | 9.753181   | C                                                          | 0.327809  | -2.208927 | 1.378348  |
| C | 7.417087   | -2.046115  | 7.458388   | C                                                          | -0.019494 | -3.444562 | 2.049489  |
| C | 6.903262   | -3.343267  | 7.297072   | H                                                          | 0.334335  | -4.438688 | 1.764431  |
| H | 5.838118   | -3.484597  | 7.063427   | C                                                          | -0.890232 | -3.121626 | 3.055532  |
| C | 7.768667   | -4.433250  | 7.424002   | H                                                          | -1.411245 | -3.797553 | 3.740320  |
| H | 7.373420   | -5.453460  | 7.297237   | C                                                          | -1.074148 | -1.684686 | 2.999620  |
| C | 9.142588   | -4.251459  | 7.704559   | C                                                          | 2.281684  | 3.379343  | -1.968910 |

|   |           |            |            |   |           |            |           |
|---|-----------|------------|------------|---|-----------|------------|-----------|
| C | 1.604288  | 4.101498   | -2.971684  | C | -2.797964 | -3.277252  | 6.763337  |
| C | 2.290099  | 4.863914   | -3.919269  | C | -4.183406 | -3.542245  | 6.605291  |
| C | 3.705460  | 4.932811   | -3.952134  | C | -4.826542 | -2.827436  | 5.571455  |
| C | 4.388877  | 4.183162   | -2.964606  | C | -4.112958 | -1.998364  | 4.696716  |
| C | 3.688083  | 3.450482   | -1.995024  | C | -5.974582 | -5.206501  | 7.218497  |
| C | 5.561253  | 6.404844   | -4.831436  | H | -6.309815 | -5.641640  | 8.183408  |
| H | 6.125135  | 6.025660   | -3.962345  | H | -6.780654 | -4.523235  | 6.889730  |
| H | 5.360785  | 7.487801   | -4.659365  | C | -5.826668 | -6.360195  | 6.205222  |
| C | 6.423570  | 6.219820   | -6.087423  | H | -6.779307 | -6.935492  | 6.181681  |
| H | 5.923983  | 6.670583   | -6.973651  | H | -5.035772 | -7.059650  | 6.545297  |
| H | 7.389124  | 6.747930   | -5.959374  | C | -3.787479 | -7.485930  | 3.320441  |
| C | 9.264426  | 3.979719   | -6.707787  | C | -4.475634 | -7.549761  | 2.098298  |
| C | 9.185133  | 3.086315   | -7.788479  | H | -5.134790 | -6.725829  | 1.789597  |
| H | 8.307247  | 2.432691   | -7.893401  | C | -4.280506 | -8.660485  | 1.271578  |
| C | 10.238258 | 3.040436   | -8.705894  | H | -4.804074 | -8.710363  | 0.304306  |
| H | 10.184549 | 2.341598   | -9.555639  | C | -3.398608 | -9.702760  | 1.634700  |
| C | 11.376145 | 3.867487   | -8.559255  | C | -2.738487 | -9.615951  | 2.878297  |
| C | 11.428871 | 4.742288   | -7.456576  | H | -2.032200 | -10.406853 | 3.169226  |
| H | 12.312341 | 5.385270   | -7.319292  | C | -2.922988 | -8.514187  | 3.723536  |
| C | 10.380749 | 4.804056   | -6.525787  | H | -2.381572 | -8.423246  | 4.675709  |
| H | 10.420737 | 5.472421   | -5.653813  | C | -3.119051 | -10.842987 | 0.694002  |
| C | 12.498893 | 3.802477   | -9.562153  | H | -3.965505 | -11.024110 | 0.003367  |
| H | 12.151191 | 4.107804   | -10.571390 | H | -2.223533 | -10.620053 | 0.074398  |
| H | 12.891089 | 2.768995   | -9.658973  | H | -2.901862 | -11.780230 | 1.242453  |
| H | 13.340697 | 4.462825   | -9.279303  | C | -2.548689 | 4.949184   | 2.808319  |
| C | 1.654504  | -3.415941  | -0.348219  | C | -1.951704 | 6.074074   | 3.405220  |
| C | 2.550126  | -4.268787  | 0.323769   | C | -2.645502 | 7.276692   | 3.602663  |
| C | 3.024436  | -5.464036  | -0.235989  | C | -3.994047 | 7.424551   | 3.199667  |
| C | 2.645558  | -5.875978  | -1.536635  | C | -4.602642 | 6.273424   | 2.640919  |
| C | 1.733283  | -5.016393  | -2.201886  | C | -3.906203 | 5.080001   | 2.452554  |
| C | 1.248423  | -3.843092  | -1.628797  | C | -4.162163 | 9.905486   | 3.169232  |
| C | 3.761478  | -8.141382  | -1.642518  | H | -4.956590 | 10.643467  | 3.407864  |
| H | 4.493358  | -7.797455  | -0.889841  | H | -3.352603 | 10.061870  | 3.905366  |
| H | 4.345900  | -8.636342  | -2.446735  | C | -3.615698 | 10.163779  | 1.757846  |
| C | 2.812334  | -9.184663  | -1.026627  | H | -2.823347 | 9.418354   | 1.534220  |
| H | 2.146949  | -9.608843  | -1.805812  | H | -3.130648 | 11.165146  | 1.709515  |
| H | 3.415199  | -10.035871 | -0.631401  | C | -3.834394 | 8.077719   | -0.969239 |
| C | -0.582432 | -7.551727  | -0.109053  | C | -2.584957 | 7.673380   | -1.458594 |
| C | -0.698744 | -7.024649  | -1.405935  | H | -1.839877 | 8.436744   | -1.725083 |
| H | -0.245479 | -7.547316  | -2.259990  | C | -2.319102 | 6.302680   | -1.591878 |
| C | -1.384276 | -5.818641  | -1.586649  | H | -1.344474 | 5.967931   | -1.976432 |
| H | -1.441375 | -5.379392  | -2.594304  | C | -3.278088 | 5.334479   | -1.229211 |
| C | -1.970784 | -5.139509  | -0.495146  | C | -4.533315 | 5.779148   | -0.752964 |
| C | -1.883037 | -5.725034  | 0.783987   | H | -5.290397 | 5.038782   | -0.454677 |
| H | -2.373595 | -5.235244  | 1.637197   | C | -4.824413 | 7.140740   | -0.632312 |
| C | -1.177783 | -6.917920  | 0.988067   | H | -5.797589 | 7.478712   | -0.250755 |
| H | -1.098814 | -7.370718  | 1.985957   | C | -2.977386 | 3.862395   | -1.328842 |
| C | -2.621282 | -3.794395  | -0.674061  | H | -3.133757 | 3.364689   | -0.350223 |
| H | -1.844269 | -2.999535  | -0.683384  | H | -3.656140 | 3.365522   | -2.054020 |
| H | -3.315166 | -3.563562  | 0.156857   | H | -1.935020 | 3.677996   | -1.648192 |
| H | -3.168082 | -3.722840  | -1.635092  | N | -1.630761 | 1.264106   | 2.828179  |
| N | 1.066574  | 0.323542   | -0.062219  | N | -0.096050 | 2.762667   | 0.921004  |
| N | -0.311274 | -1.145328  | 1.983551   | N | -4.771345 | -4.437283  | 7.479141  |
| N | 4.315491  | 5.651494   | -4.967518  | H | -4.064388 | -4.934816  | 8.025571  |
| H | 3.628947  | 6.084559   | -5.590098  | N | -5.488049 | -5.936245  | 4.852894  |
| N | 6.683319  | 4.815176   | -6.389160  | H | -5.927949 | -5.069695  | 4.518274  |
| H | 5.836567  | 4.238705   | -6.264105  | N | -4.745409 | 8.579228   | 3.343170  |
| N | 3.092295  | -6.989326  | -2.211650  | H | -5.641999 | 8.485053   | 2.858627  |
| H | 2.606249  | -7.142600  | -3.096492  | N | -4.679177 | 9.990846   | 0.770120  |
| N | 1.951629  | -8.599469  | -0.015029  | H | -5.390190 | 10.736183  | 0.773493  |
| H | 2.367042  | -8.353249  | 0.888887   | S | -3.891480 | -5.996035  | 4.304546  |
| S | 7.924723  | 4.031876   | -5.513574  | S | -4.202699 | 9.828668   | -0.871694 |
| S | 0.333264  | -9.066557  | 0.149370   | F | -0.779564 | -2.279564  | 6.094504  |
| F | 0.259147  | 4.089637   | -3.025238  | F | -2.145062 | -3.934468  | 7.744228  |
| F | 1.601275  | 5.555701   | -4.854957  | F | -4.785417 | -1.434938  | 3.683737  |
| F | 4.402505  | 2.789473   | -1.076125  | F | -6.142926 | -3.050465  | 5.295723  |
| F | 5.733590  | 4.156753   | -2.939632  | F | -0.671101 | 6.019800   | 3.798645  |
| F | 2.984428  | -3.945328  | 1.550353   | F | -1.990326 | 8.303446   | 4.186518  |
| F | 3.854070  | -6.226625  | 0.518608   | F | -4.543592 | 4.054953   | 1.860758  |
| F | 0.339468  | -3.131347  | -2.317345  | F | -5.886014 | 6.376052   | 2.226409  |
| F | 1.280783  | -5.409127  | -3.418179  | O | -3.778221 | -4.838420  | 3.379347  |
| O | 7.431646  | 2.654367   | -5.308229  | O | -2.967613 | -6.167823  | 5.453222  |
| O | 8.377963  | 4.896080   | -4.396533  | O | -2.943301 | 10.567001  | -1.124131 |
| O | 0.046139  | -9.971171  | -0.991631  | O | -5.435864 | 10.129260  | -1.627300 |
| O | 0.130745  | -9.488640  | 1.553153   |   |           |            |           |
| C | -1.968909 | -0.981314  | 3.830775   |   |           |            |           |
| C | -2.215422 | 0.400339   | 3.729826   |   |           |            |           |
| C | -3.128394 | 1.121529   | 4.593469   |   |           |            |           |
| H | -3.702825 | 0.675016   | 5.411727   |   |           |            |           |
| C | -3.095612 | 2.432420   | 4.195559   |   |           |            |           |
| H | -3.635804 | 3.284364   | 4.621706   |   |           |            |           |
| C | -2.151106 | 2.511461   | 3.099314   |   |           |            |           |
| C | -1.791280 | 3.714990   | 2.465390   |   |           |            |           |
| C | -0.792228 | 3.816302   | 1.476457   |   |           |            |           |
| C | -0.368992 | 5.064362   | 0.874470   |   |           |            |           |
| H | -0.765644 | 6.054701   | 1.114671   |   |           |            |           |
| C | 0.599369  | 4.752121   | -0.042359  |   |           |            |           |
| H | 1.167837  | 5.437648   | -0.679095  |   |           |            |           |
| C | 0.734772  | 3.310341   | -0.034233  |   |           |            |           |
| C | -2.733703 | -1.770775  | 4.834343   |   |           |            |           |
| C | -2.096290 | -2.435903  | 5.902120   |   |           |            |           |

## FIYMEI

Conformation 10.

Multiplicity: 4

Charge: 0

E(B97-3c) = -6436.941306932763 Hartree

E(M06/def2-TZVP) = -6437.190121005134 Hartree

E(PBE - D3(BJ)/def2-TZVP) = -6434.685977871798 Hartree

E(PBE0 - D3(BJ)/def2-TZVP) = -6435.145144706639 Hartree

E(PBEh-3c) = -6428.336065124559 Hartree

E(PM6) = -197.36108 Kcal/mol

E(PM7) = -368.28448 Kcal/mol

E( $\omega$ B97X-V/def2-TZVP) = -6440.934556400814 Hartree

E(GFN1-xTB) = -241.619561399440 Hartree

E(GFN2-xTB) = -236.798112939851 Hartree

E(GFN-FF) = -31.239323464338 Hartree

Coordinates:

|    |           |           |           |
|----|-----------|-----------|-----------|
| Co | -0.519231 | 0.314856  | 0.002990  |
| Si | -2.193774 | 2.477909  | 0.379173  |
| O  | -0.778459 | 2.365647  | -0.698573 |
| C  | -1.578993 | 1.196086  | 1.583572  |
| C  | 0.261373  | 4.119194  | -1.998621 |
| C  | -0.650363 | 3.016267  | -1.914222 |
| C  | 0.446268  | 4.757513  | -3.279981 |
| C  | -3.691956 | 2.022771  | -0.666596 |
| H  | -3.763584 | 2.718650  | -1.526450 |
| H  | -4.621984 | 2.136545  | -0.075403 |
| H  | -3.651164 | 0.988579  | -1.056361 |
| C  | -1.356350 | 2.588284  | -3.030846 |
| H  | -2.034498 | 1.731331  | -2.946773 |
| C  | 0.992908  | 4.592404  | -0.874096 |
| H  | 0.838055  | 4.106222  | 0.095673  |
| C  | -0.288243 | 4.289103  | -4.409179 |
| H  | -0.136984 | 4.781023  | -5.382088 |
| C  | 1.881380  | 5.650389  | -1.000301 |
| H  | 2.439842  | 6.004084  | -0.120447 |
| C  | -2.430475 | 4.293962  | 0.817214  |
| H  | -1.597396 | 4.758822  | 1.371989  |
| H  | -3.353175 | 4.394956  | 1.425413  |
| H  | -2.582830 | 4.865006  | -0.122170 |
| C  | -1.172747 | 3.230062  | -4.282782 |
| H  | -1.730821 | 2.858592  | -5.154743 |
| C  | 1.368527  | 5.841516  | -3.371377 |
| H  | 1.512256  | 6.327315  | -4.349066 |
| C  | 2.073030  | 6.278772  | -2.259423 |
| H  | 2.782028  | 7.115483  | -2.350510 |
| Si | -0.486657 | 1.880688  | 2.942491  |
| O  | -1.630635 | 2.364863  | 4.158711  |
| C  | -1.578514 | 4.286934  | 5.604421  |
| C  | -1.315066 | 2.892334  | 5.375942  |
| C  | -1.264154 | 4.855431  | 6.892556  |
| C  | 0.711396  | 0.626576  | 3.678319  |
| H  | 1.302712  | 1.100818  | 4.486964  |
| H  | 1.414844  | 0.312015  | 2.882263  |
| H  | 0.224698  | -0.279075 | 4.081636  |
| C  | -0.782483 | 2.107292  | 6.397849  |
| H  | -0.602610 | 1.039049  | 6.213264  |
| C  | -2.140583 | 5.117463  | 4.594407  |
| H  | -2.386555 | 4.662429  | 3.626308  |
| C  | -0.711426 | 4.022254  | 7.909289  |
| H  | -0.474263 | 4.462739  | 8.889644  |
| C  | -2.376810 | 6.463702  | 4.832792  |
| H  | -2.812371 | 7.094478  | 4.042801  |
| C  | 0.580204  | 3.412988  | 2.654309  |
| H  | 0.050199  | 4.283334  | 2.229337  |
| H  | 1.462458  | 3.187413  | 2.025277  |
| H  | 0.958798  | 3.717715  | 3.652793  |
| C  | -0.482761 | 2.677230  | 7.662188  |
| H  | -0.063182 | 2.034855  | 8.451435  |
| C  | -1.520045 | 6.243449  | 7.101017  |
| H  | -1.279194 | 6.679823  | 8.083103  |
| C  | -2.061200 | 7.031918  | 6.096192  |
| H  | -2.250980 | 8.100911  | 6.277254  |
| Si | -2.946120 | 0.181373  | 3.272242  |
| O  | -3.356910 | -1.006458 | 1.168562  |
| C  | -5.506647 | -2.072307 | 0.884684  |
| C  | -4.153051 | -2.098654 | 1.368427  |
| C  | -6.319657 | -3.256672 | 1.028728  |
| C  | -2.549962 | -0.766769 | 3.956916  |
| H  | -3.442347 | -1.367607 | 4.226784  |
| H  | -2.361705 | -0.049503 | 4.778759  |
| H  | -1.691935 | -1.459619 | 3.881722  |
| C  | -3.649295 | -3.251058 | 1.969078  |
| H  | -2.610497 | -3.250134 | 2.326126  |
| H  | -6.063642 | -0.919828 | 0.260738  |
| C  | -5.431457 | -0.030900 | 0.146241  |
| C  | -5.768364 | -4.414737 | 1.650687  |
| H  | -6.395798 | -5.312707 | 1.756479  |
| H  | -7.370331 | -0.925591 | -0.206176 |
| H  | -7.784597 | -0.027330 | -0.688713 |
| C  | -4.499402 | 1.174247  | 2.787830  |
| H  | -4.923632 | 1.741383  | 1.937967  |
| H  | -4.224175 | 1.896153  | 3.583735  |
| H  | -5.294264 | 0.506057  | 3.177975  |
| C  | -4.460175 | -2.109963 | 2.109963  |
| H  | -4.035518 | -5.302021 | 2.586801  |
| C  | -7.658512 | -3.225196 | 0.536361  |
| H  | -8.278365 | -4.128904 | 0.645203  |
| C  | -8.175121 | -2.088188 | -0.067108 |
| H  | -9.210543 | -2.084488 | -0.440307 |
| Si | 1.705317  | -2.153374 | -1.042330 |
| O  | 2.095774  | -3.561147 | 0.108714  |
| C  | 1.080578  | -0.982526 | -0.273653 |
| C  | 4.021032  | -4.981917 | -0.066373 |
| C  | 2.748519  | -4.681487 | 0.531034  |

|    |           |           |           |
|----|-----------|-----------|-----------|
| C  | 4.706332  | -6.190087 | 0.322478  |
| C  | 0.354351  | -2.623683 | 2.280683  |
| H  | 0.777483  | -2.947209 | 3.252514  |
| H  | -0.293684 | -1.744873 | 2.453428  |
| H  | -0.283126 | -3.437382 | 1.886483  |
| C  | 2.200007  | -5.543584 | 1.479597  |
| C  | 1.221230  | -5.307025 | 1.919756  |
| C  | 4.617281  | -4.113767 | -1.023735 |
| H  | 4.091597  | -3.185928 | -1.284738 |
| C  | 4.114147  | -7.047905 | 1.296349  |
| H  | 4.643875  | -7.966883 | 1.590632  |
| C  | 5.844471  | -4.425693 | -1.592280 |
| H  | 6.292456  | -3.743157 | -2.330236 |
| C  | 3.289827  | -1.725784 | 1.968245  |
| H  | 4.103274  | -1.470326 | 1.263150  |
| H  | 3.164447  | -0.903446 | 2.699281  |
| H  | 3.598296  | -2.630002 | 2.533720  |
| C  | 2.889871  | -6.724362 | 1.860746  |
| H  | 2.435109  | -7.389429 | 2.610989  |
| C  | 5.964810  | -6.478060 | -0.284382 |
| H  | 6.490185  | -7.400880 | 0.008413  |
| C  | 6.520877  | -5.618528 | -1.213303 |
| H  | 7.493698  | -5.858398 | -1.677553 |
| Si | 0.092959  | -1.983038 | -1.493856 |
| O  | -1.058799 | -0.670660 | -1.896847 |
| C  | -2.069954 | -0.667429 | -4.105280 |
| C  | -2.173909 | -0.878966 | -2.690161 |
| C  | -3.242337 | -0.898659 | -4.917111 |
| C  | -1.011519 | -3.347892 | -0.825156 |
| H  | -1.695550 | -3.691912 | -1.627144 |
| H  | -0.399131 | -4.210076 | -0.497229 |
| H  | -1.633093 | -2.999494 | 0.021523  |
| C  | -3.373108 | -1.280135 | -2.115191 |
| H  | -3.413172 | -1.413178 | -1.027177 |
| C  | -0.871533 | -0.217501 | -4.729132 |
| H  | 0.000648  | -0.004984 | -4.100328 |
| C  | -4.455233 | -1.319481 | -4.296489 |
| H  | -5.340732 | -1.494098 | -4.926586 |
| C  | -0.816459 | -0.019901 | -6.100703 |
| H  | 0.116383  | 0.334951  | -6.564276 |
| C  | 0.919932  | -2.605979 | -3.061173 |
| H  | 1.474535  | -1.825104 | -3.611315 |
| H  | 1.639537  | -3.390472 | -2.748432 |
| H  | 0.177422  | -3.058706 | -3.748442 |
| C  | -4.518153 | -1.499484 | -2.923518 |
| H  | -5.455270 | -1.813394 | -2.440152 |
| C  | -3.145777 | -0.687657 | -6.324978 |
| H  | -4.038092 | -0.868808 | -6.944337 |
| H  | -1.960862 | -0.262025 | -6.907037 |
| H  | -1.906486 | -0.105610 | -7.995101 |
| Si | 2.418822  | 0.115095  | -0.959096 |
| O  | 3.812043  | -0.887041 | -1.192984 |
| C  | 5.520218  | -0.917869 | -2.881475 |
| C  | 5.056260  | -0.501303 | -1.585491 |
| C  | 6.859888  | -0.569097 | -3.288198 |
| C  | 2.833384  | 1.498691  | 0.252597  |
| H  | 3.642592  | 2.152037  | -0.129856 |
| H  | 1.923937  | 2.122070  | 0.361558  |
| H  | 3.119447  | 1.120684  | 1.252998  |
| C  | 5.899298  | 0.223208  | -0.743576 |
| H  | 5.538881  | 0.510807  | 0.253820  |
| C  | 4.700114  | -1.677968 | -3.762858 |
| C  | 3.689442  | -1.949204 | -3.431598 |
| C  | 7.686799  | 0.184793  | -2.404553 |
| H  | 8.706514  | 0.449054  | -2.723359 |
| H  | 5.175075  | -2.085018 | -5.001322 |
| H  | 4.532022  | -2.679179 | -5.668135 |
| H  | 2.108000  | 0.917181  | -2.636646 |
| H  | 2.140808  | 0.174286  | -3.456474 |
| H  | 1.139820  | 1.450593  | -2.682425 |
| H  | 2.910045  | 1.657913  | -2.832364 |
| C  | 7.210690  | 0.567832  | -1.159934 |
| H  | 7.854992  | 1.140457  | -0.475332 |
| H  | 7.312769  | -1.002564 | -4.569984 |
| C  | 8.335664  | -0.739392 | -4.882327 |
| C  | 6.492593  | -1.743606 | -5.408388 |
| H  | 6.863159  | -2.071827 | -6.391535 |

Conformation 12.

Multiplicity: 4

Charge: 0

E(B97-3c) = -6436.930224371637 Hartree

E(M06/def2-TZVP) = -6437.178031120511 Hartree

E(PBE - D3(BJ)/def2-TZVP) = -6434.675468905502 Hartree

E(PBE0 - D3(BJ)/def2-TZVP) = -6435.134479386317 Hartree

E(PBEh-3c) = -6428.321613829956 Hartree

E(PM6) = -190.96799 Kcal/mol

E(PM7) = -316.01737 Kcal/mol

E(wB97X-V/def2-TZVP) = -6440.924145447530 Hartree

E(GFN1-xTB) = -241.626368458921 Hartree

E(GFN2-xTB) = -236.791307689990 Hartree

E(GFN-FF) = -31.314329122815 Hartree

Coordinates:

Co -0.808621 -0.180561 1.293930  
Si -3.261116 -2.851498 0.967150  
O -3.898316 -2.112642 -0.459024  
C -2.424696 -1.494634 1.936082  
C -5.920102 -2.835472 -1.587059  
C -4.486580 -2.723066 -1.530396  
C -6.523289 -3.454666 -2.744659  
C -2.208373 -4.310961 0.394054  
H -2.691499 -4.747688 -0.504660  
H -2.169106 -5.102484 1.166548  
H -1.172333 -4.037019 0.119636  
C -3.712150 -3.182404 -2.594761  
H -2.621596 -3.064317 -2.548685  
C -6.765473 -2.345870 -0.551413  
H -6.301270 -1.854231 0.311394  
C -5.694125 -3.924558 -3.804408  
H -6.164807 -4.392829 -4.682174  
C -8.144594 -2.471654 -0.633280  
H -8.780973 -2.084108 0.176865  
C -4.717131 -3.569045 1.943848  
H -5.410121 -2.779079 2.297854  
H -4.337626 -4.102821 2.840917  
H -5.305147 -4.290374 1.340222  
C -4.317827 -3.781590 -3.728118  
H -3.677197 -4.132456 -4.551361  
C -7.944598 -3.570290 -2.792929  
H -8.401051 -4.046015 -3.675077  
C -8.740365 -3.094266 -1.762100  
H -9.835178 -3.191397 -1.819837  
Si -3.517389 -0.028420 2.264961  
O -2.217635 1.201831 2.223638  
C -2.261370 3.278937 3.485643  
C -2.370842 2.576299 2.240230  
C -2.315202 4.722532 3.463655  
C -4.794891 0.476482 0.983740  
H -4.920245 1.578734 1.016664  
H -5.774539 0.033539 1.254889  
H -4.549403 0.155956 -0.042590  
C -2.590372 3.267247 1.055658  
H -2.683766 2.704270 0.118882  
C -2.101413 2.617149 4.735992  
H -2.094670 1.521228 4.753378  
C -2.509886 5.400595 2.225116  
H -2.545836 6.500389 2.221230  
C -1.970807 3.336291 5.915197  
H -1.848697 2.803536 6.870365  
C -4.427410 0.165696 3.908774  
H -3.820949 0.024308 4.818515  
H -5.252895 -0.576833 3.933167  
H -4.887240 1.174908 3.949749  
C -2.658209 4.683745 1.048754  
H -2.816927 5.206048 0.093674  
C -2.173915 5.429328 4.694593  
H -2.208339 6.529565 4.673075  
C -1.999829 4.755948 5.894084  
H -1.891838 5.319514 6.832960  
Si -1.373469 -2.066183 3.349292  
O 0.098790 -1.096554 3.020026  
C 2.045125 -1.400545 4.463201  
C 0.944860 -0.605430 4.002391  
C 2.906444 -0.839959 5.480658  
C -1.800628 -1.623265 5.132759  
H -1.007954 -2.024647 5.796698  
H -2.764077 -2.086448 5.426021  
H -1.862038 -0.534519 5.315277  
C 0.724571 0.665186 4.513588  
H -0.123507 1.245476 4.132226  
C 2.340586 -2.694405 3.946320  
H 1.710768 -3.102506 3.148709  
C 2.647137 0.468062 5.985594  
H 3.315189 0.880688 6.756651  
C 3.426633 -3.417487 4.417745  
H 3.644220 -4.411197 3.998194  
C -0.880956 -3.883897 3.388730  
H -0.365774 -4.229349 2.474029  
H -1.786059 -4.510951 3.527757  
H -0.213647 -4.061024 4.255258  
C 1.577561 1.207062 5.506078  
H 1.375275 2.219389 5.887152  
C 4.009031 -1.617047 5.944024  
H 4.661599 -1.188229 6.720261  
C 4.265222 -2.878258 5.428526  
H 5.123735 -3.460476 5.795714  
Si 1.777678 1.352545 0.485280  
O 2.528418 2.203605 -0.817926  
C 0.421678 0.271345 -0.254829  
C 4.248505 3.881108 -0.862011  
C 3.842559 2.509246 -0.996848

C 5.633611 4.219681 -1.087003  
C 3.153443 0.474932 1.421582  
H 3.890983 1.233730 1.753380  
H 2.772728 -0.044567 2.320179  
H 3.687722 -0.255953 0.786748  
C 4.768693 1.534670 -1.363600  
H 4.423951 0.499806 -1.484916  
C 3.324262 4.910192 -0.523288  
C 2.270407 4.636698 -0.374868  
H 6.556926 3.193212 -1.444956  
H 7.611049 3.460939 -1.614875  
C 3.744624 6.226517 -0.395550  
H 3.019719 7.013157 -0.136062  
C 1.094970 2.724715 1.590267  
H 0.320181 3.325024 1.077021  
H 0.656759 2.333026 2.527924  
H 1.923329 3.405865 1.874508  
C 6.125798 1.882008 -1.582918  
H 6.834866 1.089470 -1.867599  
C 6.027928 5.583377 -0.944181  
H 7.084529 5.844735 -1.113463  
C 5.108586 6.565062 -0.604332  
H 5.433909 7.611684 -0.501222  
Si 1.090146 -1.360105 -0.900135  
O 2.568288 -1.009531 -1.719755  
C 4.441038 -2.344299 -2.417022  
C 3.177381 -1.722219 -2.707899  
H 5.138175 -3.032928 -3.477215  
C -0.078665 -2.303992 -2.033446  
H 0.395769 -3.248401 -2.368061  
H -0.981047 -2.562451 -2.446474  
H -0.385472 -1.719894 -2.919526  
C 2.637979 -1.799599 -3.990610  
H 1.684541 -1.298001 -4.198169  
C 5.026846 -2.295351 -1.119479  
H 4.482825 -1.776512 -0.318940  
C 4.553737 -3.093177 -4.775803  
H 5.092076 -3.619382 -5.578803  
C 6.255603 -2.889626 -0.869204  
H 6.694540 -2.840050 0.138925  
C 1.574915 -2.586174 0.450462  
C 2.274618 -2.154151 1.187206  
H 0.678154 -2.943279 0.994482  
H 2.064407 -3.463611 -0.020662  
C 3.328794 -2.489494 -5.018228  
H 2.882662 -2.527790 -6.023719  
C 6.398984 -3.632461 -3.182292  
H 6.932690 -4.154801 -3.991963  
C 6.949076 -3.562133 -1.910908  
H 7.924311 -4.029650 -1.705717  
Si -0.494270 1.141443 -1.663649  
O 0.086180 0.567819 -3.188300  
C 0.101500 1.373130 -5.444011  
C 0.759890 1.218678 -4.176622  
C 0.814136 2.019634 -6.520201  
C -0.363116 3.017732 -1.760317  
H -0.989772 -3.098972 -2.605868  
H -0.703200 3.524139 -0.838072  
C 0.685031 3.315404 -1.951458  
C 2.063798 1.670571 -4.000274  
H 2.546060 1.517312 -3.028135  
C -1.224240 0.902701 -5.66527  
H -1.745672 0.401995 -4.838128  
C 2.144657 2.483179 -6.299990  
H 2.679958 2.976998 -7.125440  
C -1.835956 1.065452 -6.901667  
H -2.860651 0.696397 -7.061733  
C -2.297866 0.607030 -1.718330  
H -2.398942 -0.491414 -1.798548  
H -2.841091 0.906224 -0.802657  
H -2.811351 1.071331 -2.584995  
C 2.750746 2.306143 -5.064699  
H 3.780744 2.654820 -4.893525  
C 0.151043 2.170085 -7.774580  
H 0.691493 2.664433 -8.597353  
C -1.142744 1.706368 -7.963718  
H -1.635415 1.832365 -8.940122

Conformation 17.

Multiplicity: 4

Charge: 0

E(B97-3c) = -6436.925473889696 Hartree

E(M06/def2-TZVP) = -6437.177491592233 Hartree

E(PBE - D3(BJ)/def2-TZVP) = -6434.672598511813 Hartree

E(PBE0 - D3(BJ)/def2-TZVP) = -6435.127929786493 Hartree

E(PBEh-3c) = -6428.302559712051 Hartree

E(PM6) = -203.78526 Kcal/mol

E(PM7) = -376.19146 Kcal/mol

E( $\omega$ B97X-V/def2-TZVP) = -6440.921646399332 Hartree

E(GFN1-xTB) = -241.622693846788 Hartree

E(GFN2-xTB) = -236.788553791529 Hartree

E(GFN-FF) = -31.243048823054 Hartree

Coordinates:

|    |           |           |           |
|----|-----------|-----------|-----------|
| Co | -0.135588 | 0.096099  | -0.543206 |
| Si | -1.391496 | -1.527286 | -2.397848 |
| O  | 0.353128  | -1.284840 | -2.139171 |
| C  | -1.864548 | 0.154369  | -1.731866 |
| C  | 2.035966  | -1.896527 | -3.770519 |
| C  | 1.361131  | -2.151119 | -2.533140 |
| C  | 3.130538  | -2.766374 | -4.134568 |
| C  | -1.819927 | -3.052294 | -1.391830 |
| H  | -1.183370 | -3.887796 | -1.749954 |
| H  | -2.879782 | -3.341419 | -1.522359 |
| H  | -1.646029 | -2.906711 | -0.311403 |
| C  | 1.723001  | -3.214292 | -1.719406 |
| H  | 1.201641  | -3.357297 | -0.766211 |
| C  | 1.671046  | -0.833889 | -4.647079 |
| H  | 0.818859  | -0.191847 | -4.390016 |
| C  | 3.489388  | -3.843589 | -3.271563 |
| H  | 4.328271  | -4.495912 | -3.558615 |
| C  | 2.362996  | -0.624420 | -5.831937 |
| H  | 2.060102  | 0.196239  | -6.500129 |
| C  | -1.689955 | -1.943590 | -4.204944 |
| H  | -1.469103 | -1.095273 | -4.875724 |
| H  | -2.756574 | -2.225781 | -4.330579 |
| H  | -1.075000 | -2.820040 | -4.496203 |
| C  | 2.794225  | -4.064678 | -2.092459 |
| H  | 3.070610  | -4.893110 | -1.423123 |
| C  | 3.819182  | -2.515318 | -5.358432 |
| H  | 4.655286  | -3.176784 | -5.634270 |
| C  | 3.448644  | -1.467934 | -6.188541 |
| H  | 3.991289  | -1.292460 | -7.129800 |
| Si | -1.212190 | 1.586814  | -2.724336 |
| O  | -1.161466 | 1.143943  | -4.394872 |
| C  | -2.068498 | 2.262516  | -6.314936 |
| C  | -0.959744 | 1.998002  | -5.441219 |
| C  | -1.872362 | 3.143326  | -7.440001 |
| C  | -2.158727 | 3.214753  | -2.685467 |
| H  | -1.679069 | 3.900318  | -3.414609 |
| H  | -2.131471 | 3.703087  | -1.692771 |
| H  | -3.215001 | 3.088365  | -2.994270 |
| C  | 0.283428  | 2.577219  | -5.688422 |
| H  | 1.125946  | 2.351980  | -5.019885 |
| C  | -3.349366 | 1.681000  | -6.095723 |
| H  | -3.475686 | 1.002072  | -5.241407 |
| C  | -0.587172 | 3.721236  | -7.660873 |
| H  | -0.444834 | 4.391202  | -8.522289 |
| C  | -4.408084 | 1.961475  | -6.947743 |
| H  | -5.393653 | 1.505742  | -6.767961 |
| C  | 0.604261  | 1.941232  | -2.234313 |
| H  | 1.318485  | 1.303702  | -2.788589 |
| H  | 0.827712  | 1.838151  | -1.139931 |
| H  | 0.844809  | 3.004072  | -2.445047 |
| C  | 0.464152  | 3.438582  | -6.802446 |
| H  | 1.455611  | 3.883090  | -6.978162 |
| C  | -2.983822 | 3.406713  | -8.294596 |
| H  | -2.838093 | 4.078990  | -9.154607 |
| C  | -4.223759 | 2.832638  | -8.054811 |
| H  | -5.068989 | 3.048769  | -8.725807 |
| Si | -3.641107 | 0.290071  | -1.212023 |
| O  | -3.919295 | -1.133407 | -0.273968 |
| C  | -5.978472 | -2.389810 | -0.161012 |
| C  | -5.049034 | -1.456899 | 0.416785  |
| C  | -7.148248 | -2.764650 | 0.597796  |
| H  | -4.130565 | 1.766463  | -0.147334 |
| C  | -5.182133 | 1.633678  | 0.180096  |
| H  | -4.072259 | 2.713934  | -0.716231 |
| H  | -3.503918 | 1.866384  | 0.757891  |
| C  | -5.283559 | -0.935085 | 1.687715  |
| H  | -4.555012 | -0.233218 | 2.116313  |
| C  | -5.780165 | -2.958104 | -1.451981 |
| H  | -4.886593 | -2.667631 | -2.020255 |
| C  | -7.354389 | -2.205347 | 1.892698  |
| H  | -8.248952 | -2.497889 | 2.463179  |
| C  | -6.692880 | -3.857939 | -1.983106 |
| H  | -6.523456 | -4.288351 | -2.981735 |
| C  | -4.829548 | 0.229832  | -2.682276 |
| H  | -4.565342 | -0.581875 | -3.389246 |
| H  | -4.806213 | 1.185653  | -3.245551 |
| H  | -5.871830 | 0.062421  | -2.341148 |
| C  | -6.436957 | -1.310620 | 2.421821  |
| H  | -6.595403 | -0.883756 | 3.423809  |
| C  | -8.065114 | -3.692205 | 0.019152  |
| H  | -8.957060 | -3.978261 | 0.598344  |
| C  | -7.846205 | -4.227896 | -1.241025 |
| H  | -8.565462 | -4.942644 | -1.668938 |
| Si | 0.348736  | 1.769700  | 2.136065  |
| O  | 0.706318  | 2.448838  | 3.327008  |
| C  | 0.549224  | 0.335098  | 1.339192  |
| C  | 0.387464  | 4.547749  | 4.480913  |
| C  | 0.361981  | 3.110695  | 4.468659  |

|    |           |           |           |
|----|-----------|-----------|-----------|
| C  | 0.040417  | 5.236550  | 5.701437  |
| C  | -1.949806 | 1.349822  | 3.041267  |
| H  | -2.435327 | 2.289401  | 3.374975  |
| H  | -2.648892 | 0.811764  | 2.373518  |
| H  | -1.781264 | 0.724517  | 3.938548  |
| C  | 0.051281  | 2.406219  | 5.630182  |
| H  | 0.078356  | 1.307854  | 5.605146  |
| C  | 0.761122  | 5.308588  | 3.336545  |
| H  | 1.053781  | 4.773677  | 2.423378  |
| C  | -0.297912 | 4.480897  | 6.862278  |
| H  | -0.560801 | 5.015459  | 7.787720  |
| C  | 0.773164  | 6.695471  | 3.378570  |
| H  | 1.069721  | 7.269684  | 2.487740  |
| C  | -0.745674 | 3.150026  | 0.908351  |
| H  | 0.159768  | 3.541056  | 0.406305  |
| H  | -1.440532 | 2.775560  | 0.130603  |
| H  | -1.242834 | 3.995018  | 1.426431  |
| C  | -0.281321 | 3.095062  | 6.824209  |
| H  | -0.526998 | 2.514038  | 7.726086  |
| C  | 0.057932  | 6.663078  | 5.704389  |
| H  | -0.211282 | 7.188919  | 6.633853  |
| C  | 0.411971  | 7.378753  | 4.570379  |
| H  | 0.422105  | 8.479098  | 4.594036  |
| Si | 0.238818  | -1.272162 | 2.265190  |
| O  | 1.213641  | -2.430779 | 1.422911  |
| C  | 2.578364  | -4.129453 | 2.473265  |
| C  | 1.387273  | -3.742830 | 1.766435  |
| C  | 2.783123  | -5.526783 | 2.774046  |
| C  | -1.553551 | -1.867283 | 2.178524  |
| H  | -1.581893 | -2.972398 | 3.264659  |
| H  | -2.139017 | -4.466254 | 2.028174  |
| H  | -2.075171 | -1.574192 | 1.245865  |
| C  | 0.462617  | -4.710627 | 1.374099  |
| H  | -0.430700 | -4.400302 | 0.815314  |
| C  | 3.558431  | -3.177702 | 2.874342  |
| H  | 3.397188  | -2.117381 | 2.637181  |
| C  | 1.810411  | -6.485340 | 2.362408  |
| H  | 1.977343  | -7.547857 | 2.596573  |
| C  | 4.698939  | -3.582554 | 3.554349  |
| H  | 5.448969  | -2.833785 | 3.850582  |
| C  | 0.769389  | -1.278734 | 4.073964  |
| H  | 1.749576  | -0.785690 | 4.210189  |
| H  | 0.015518  | -0.761101 | 4.701194  |
| H  | 0.846024  | -2.324316 | 4.437790  |
| C  | 0.677109  | -6.080787 | 1.674951  |
| H  | -0.070460 | -6.821603 | 1.352843  |
| C  | 3.966580  | -5.903063 | 3.476082  |
| H  | 4.122852  | -6.968419 | 3.708009  |
| H  | 4.903496  | -4.954479 | 3.859155  |
| H  | 5.810888  | -5.264389 | 4.399984  |
| Si | 2.394344  | 0.688912  | 1.085316  |
| O  | 3.277865  | 0.084011  | 2.436842  |
| C  | 5.554444  | 0.363879  | 3.160288  |
| C  | 4.162029  | 0.705260  | 3.267900  |
| C  | 6.488351  | 0.972961  | 4.077978  |
| C  | 2.859370  | 2.507510  | 0.899937  |
| H  | 3.965425  | 2.574094  | 0.843298  |
| H  | 2.451808  | 2.946153  | -0.032683 |
| H  | 2.523016  | 3.111546  | 1.763295  |
| C  | 3.731655  | 3.609117  | 4.235255  |
| H  | 2.663586  | 1.852485  | 4.286042  |
| C  | 6.037426  | -0.553986 | 2.184061  |
| H  | 5.316928  | -1.020743 | 1.499004  |
| C  | 6.011833  | 1.896480  | 5.054491  |
| H  | 6.732159  | 2.357481  | 5.747492  |
| C  | 7.387473  | -0.867994 | 2.110821  |
| H  | 7.743570  | -1.583647 | 1.354319  |
| C  | 3.127822  | -0.270077 | -0.360040 |
| H  | 2.982283  | -1.356532 | -0.211732 |
| H  | 2.693175  | 0.001715  | -1.342171 |
| H  | 4.216004  | -0.060847 | -0.412943 |
| C  | 4.661679  | 2.204429  | 5.124766  |
| H  | 4.293203  | 2.917096  | 5.878512  |
| H  | 7.867947  | 0.625282  | 3.971591  |
| C  | 8.580543  | 1.087921  | 4.672547  |
| C  | 8.310575  | -0.273605 | 3.012139  |
| H  | 9.379335  | -0.529192 | 2.948031  |

Conformation 18.

Multiplicity: 4

Charge: 0

E(B97-3c) = -6436.924701603536 Hartree

E(M06/def2-TZVP) = -6437.173838456212 Hartree

E(PBE - D3(BJ)/def2-TZVP) = -6434.673377041958 Hartree

E(PBE0 - D3(BJ)/def2-TZVP) = -6435.129349120991 Hartree

E(PBEh-3c) = -6428.303585225352 Hartree

E(PM6) = -187.22108 Kcal/mol

E(PM7) = -379.82743 Kcal/mol

E( $\omega$ B97X-V/def2-TZVP) = -6440.916929076919 Hartree

E(GFN1-xTB) = -241.623328003547 Hartree

E(GFN2-xTB) = -236.784160053833 Hartree

E(GFN-FF) = -31.238590539073 Hartree

Coordinates:

|    |           |           |           |
|----|-----------|-----------|-----------|
| Co | 0.050673  | -0.300452 | -0.397082 |
| Si | -0.393277 | -0.107640 | -3.215536 |
| O  | 0.599062  | -1.230448 | -2.239281 |
| C  | -0.678194 | 1.090682  | -1.824365 |
| C  | 2.657880  | -2.261778 | -2.989202 |
| C  | 1.269119  | -2.363361 | -2.645672 |
| C  | 3.371462  | -3.477545 | -3.301993 |
| C  | -1.846336 | -1.100352 | -3.879105 |
| H  | -1.471560 | -2.077702 | -4.248848 |
| H  | -2.277583 | -0.573563 | -4.754644 |
| H  | -2.654123 | -1.262207 | -3.145141 |
| C  | 0.612920  | -3.587847 | -2.669669 |
| H  | -0.453848 | -3.625509 | -2.408933 |
| C  | 3.353746  | -1.018941 | -3.033055 |
| H  | 2.807545  | -0.087435 | -2.839350 |
| C  | 2.675990  | -4.722402 | -3.290791 |
| H  | 3.231680  | -5.642318 | -3.527573 |
| C  | 4.701706  | -0.971077 | -3.360783 |
| H  | 5.214552  | 0.002071  | -3.405069 |
| C  | 0.613762  | 0.374834  | -4.728738 |
| H  | 1.567223  | 0.871261  | -4.481824 |
| H  | 0.009209  | 1.086357  | -5.329827 |
| H  | 0.804141  | -0.520635 | -5.355794 |
| C  | 1.322510  | -4.772249 | -2.994474 |
| H  | 0.788605  | -5.734268 | -2.996816 |
| C  | 4.759498  | -3.389903 | -3.619222 |
| H  | 5.304328  | -4.318436 | -3.850119 |
| C  | 5.412866  | -2.167062 | -3.646494 |
| H  | 6.483068  | -2.119781 | -3.898342 |
| Si | 0.800027  | 2.132425  | -1.366517 |
| O  | 1.807366  | 2.395282  | -2.750833 |
| C  | 3.821174  | 3.706919  | -2.898973 |
| C  | 2.416767  | 3.541775  | -3.156705 |
| C  | 4.476553  | 4.906262  | -3.361214 |
| C  | 0.521292  | 3.802880  | -0.566737 |
| H  | 1.510761  | 4.256428  | -0.353202 |
| H  | -0.023712 | 3.704574  | 0.390305  |
| H  | -0.031184 | 4.498795  | -1.227479 |
| C  | 1.710892  | 4.524214  | -3.847496 |
| H  | 0.640769  | 4.364654  | -4.046760 |
| C  | 4.580410  | 2.724715  | -2.201203 |
| H  | 4.071423  | 1.817918  | -1.852782 |
| C  | 3.719161  | 5.893342  | -4.058166 |
| H  | 4.225626  | 6.806660  | -4.405449 |
| C  | 5.933906  | 2.910030  | -1.957038 |
| H  | 6.499246  | 2.144273  | -1.403580 |
| C  | 1.993635  | 1.109535  | -0.274382 |
| H  | 2.659875  | 0.462598  | -0.871719 |
| H  | 1.592233  | 0.513389  | 0.587211  |
| H  | 2.630617  | 1.841950  | 0.263809  |
| C  | 2.366040  | 5.700317  | -4.294155 |
| H  | 1.786475  | 6.463380  | -4.835758 |
| C  | 5.870203  | 5.061059  | -3.096233 |
| H  | 6.372315  | 5.976016  | -3.447924 |
| C  | 6.584221  | 4.089167  | -2.410293 |
| H  | 7.657677  | 4.231264  | -2.212985 |
| Si | -2.318780 | 1.959013  | -1.914982 |
| O  | -3.523001 | 0.708626  | -1.887504 |
| C  | -5.695080 | 0.834638  | -2.954040 |
| C  | -4.875197 | 0.846838  | -1.771153 |
| C  | -7.128364 | 0.941411  | -2.809813 |
| C  | -2.752226 | 3.123433  | -0.504821 |
| H  | -3.852193 | 3.262406  | -0.475967 |
| H  | -2.284503 | 4.118665  | -0.623416 |
| H  | -2.425384 | 2.703632  | 0.463078  |
| C  | -5.474906 | 0.941035  | -0.515029 |
| H  | -4.839134 | 0.934341  | 0.380242  |
| C  | -5.142245 | 0.710352  | -4.259997 |
| H  | -4.055078 | 0.608472  | -4.356845 |
| C  | -7.699400 | 1.044569  | -1.507910 |
| H  | -8.792748 | 1.124059  | -1.409797 |
| C  | -5.955887 | 0.705491  | -5.383615 |
| H  | -5.509617 | 0.606758  | -6.384890 |
| C  | -2.511131 | 2.901000  | -3.545328 |
| H  | -2.290823 | 2.266802  | -4.427838 |
| H  | -1.801916 | 3.755521  | -3.564331 |
| H  | -3.537472 | 3.304369  | -3.664200 |
| C  | -6.883874 | 1.038475  | -0.387336 |
| H  | -7.324073 | 1.111400  | 0.618912  |
| C  | -7.933710 | 0.935647  | -3.987598 |
| H  | -9.026030 | 1.020356  | -3.875236 |
| C  | -7.364614 | 0.823105  | -5.247058 |
| H  | -8.003837 | 0.819751  | -6.143065 |
| Si | -0.989467 | -0.001910 | 2.455061  |
| O  | -0.230935 | 1.504651  | 2.008497  |
| C  | -0.320421 | -1.344256 | 1.303981  |
| C  | -0.132862 | 3.601353  | 3.213498  |
| C  | 0.483880  | 2.373675  | 2.786242  |

|    |           |           |           |
|----|-----------|-----------|-----------|
| C  | 0.654855  | 4.545926  | 3.972175  |
| C  | -0.690503 | -0.227819 | 4.297878  |
| H  | -1.103184 | 0.643191  | 4.846691  |
| H  | -1.213087 | -1.141869 | 4.643517  |
| H  | 0.385620  | -0.306032 | 4.544906  |
| C  | 1.808003  | 2.108784  | 3.124556  |
| H  | 2.245906  | 1.161898  | 2.793890  |
| C  | -1.488015 | 3.919734  | 2.916426  |
| H  | -2.080382 | 3.197458  | 2.342202  |
| C  | 2.009287  | 4.237801  | 4.292898  |
| H  | 2.597218  | 4.964297  | 4.874315  |
| C  | -2.052063 | 5.116654  | 3.334201  |
| H  | -3.101346 | 5.322798  | 3.090961  |
| C  | -2.805546 | 0.379668  | 2.140208  |
| H  | -2.969440 | 0.543883  | 1.058908  |
| H  | -3.461483 | -0.443169 | 2.477477  |
| H  | -3.091588 | 1.303249  | 2.681244  |
| C  | 2.566660  | 3.038090  | 3.879342  |
| H  | 3.609370  | 2.789940  | 4.130170  |
| C  | 0.041925  | 5.766181  | 4.385398  |
| H  | 0.644817  | 6.484658  | 4.962756  |
| C  | -1.279659 | 6.049873  | 4.074841  |
| H  | -1.732409 | 6.997994  | 4.402736  |
| Si | -1.635602 | -2.636752 | 0.971049  |
| O  | -2.551825 | -2.700695 | 2.440390  |
| C  | -3.714987 | -4.457867 | 3.587855  |
| C  | -3.722855 | -3.359161 | 2.660682  |
| C  | -4.950397 | -5.151619 | 3.858453  |
| C  | -1.088111 | -4.423896 | 0.680432  |
| H  | -2.011678 | -5.032788 | 0.585370  |
| H  | -0.507509 | -4.539443 | -0.255086 |
| H  | -0.497786 | -4.851122 | 1.512608  |
| C  | -4.915663 | -2.965163 | 2.053748  |
| H  | -4.914240 | -2.110803 | 1.362216  |
| C  | -2.522396 | -4.871255 | 4.246449  |
| H  | -1.595869 | -4.318529 | 4.040142  |
| C  | -6.147528 | -4.728479 | 3.208926  |
| H  | -7.086245 | -5.263154 | 3.419528  |
| C  | -2.536961 | -5.938787 | 5.133883  |
| H  | -1.608672 | -6.246591 | 5.638398  |
| C  | -2.741701 | -2.213927 | -0.488636 |
| H  | -3.121248 | -1.175536 | -0.501085 |
| H  | -2.141787 | -2.346279 | -1.411625 |
| H  | -3.599371 | -2.913461 | -0.552623 |
| C  | -6.123991 | -3.655577 | 2.330943  |
| H  | -7.050384 | -3.325233 | 1.836605  |
| C  | -4.925832 | -6.244505 | 4.775207  |
| H  | -5.867193 | -6.777408 | 4.982319  |
| C  | -3.748333 | -6.631730 | 5.398075  |
| H  | -3.750918 | -7.477229 | 6.102905  |
| Si | 1.258343  | -2.181559 | 1.885816  |
| O  | 2.356546  | -0.895099 | 2.264330  |
| C  | 4.773784  | -0.895819 | 2.239353  |
| C  | 3.529153  | -0.951215 | 2.958300  |
| C  | 6.006884  | -0.865264 | 2.990658  |
| C  | 2.184900  | -3.203472 | 0.600724  |
| H  | 3.134768  | -3.553145 | 1.055841  |
| H  | 1.621046  | -4.090851 | 0.258822  |
| H  | 2.450105  | -2.607049 | -0.292878 |
| C  | 3.527708  | -0.974627 | 4.352141  |
| H  | 2.563905  | -0.997542 | 4.879689  |
| C  | 4.831242  | -0.864297 | 0.816997  |
| H  | 3.891850  | -0.888404 | 0.252880  |
| C  | 5.963119  | -0.896460 | 4.415394  |
| H  | 6.908809  | -0.872752 | 4.977918  |
| C  | 6.047616  | -0.808213 | 0.152125  |
| H  | 6.065039  | -0.800338 | -0.947996 |
| C  | 1.084526  | -3.233586 | 3.446694  |
| H  | 0.525773  | -2.718120 | 4.249485  |
| H  | 0.561375  | -4.182877 | 3.219161  |
| H  | 2.093787  | -3.489576 | 3.829505  |
| C  | 4.745997  | -0.950775 | 5.077178  |
| H  | 4.714207  | -0.969269 | 6.177094  |
| H  | 7.239013  | -0.802212 | 2.273716  |
| C  | 8.178413  | -0.777371 | 2.847958  |
| C  | 7.262683  | -0.774016 | 0.887274  |
| H  | 8.224170  | -0.728987 | 0.353253  |

Conformation 21.

Multiplicity: 4

Charge: 0

E(B97-3c) = -6436.948845705947 Hartree

E(M06/def2-TZVP) = -6437.197132818631 Hartree

E(PBE - D3(BJ)/def2-TZVP) = -6434.693598032518 Hartree

E(PBE0 - D3(BJ)/def2-TZVP) = -6435.154494875779 Hartree

E(PBEh-3c) = -6428.340729661084 Hartree

E(PM6) = -179.27535 Kcal/mol

E(PM7) = -372.20256 Kcal/mol

E( $\omega$ B97X-V/def2-TZVP) = -6440.923738808847 Hartree

E(GFN1-xTB) = -241.632151007728 Hartree

E(GFN2-xTB) = -236.807479124003 Hartree

E(GFN-FF) = -31.334306081172 Hartree

Coordinates:

Co -0.295620 -0.328207 -0.240347  
Si 0.267711 1.803243 2.161075  
O 1.301969 0.485178 2.623982  
C -1.058405 1.082967 1.055291  
C 2.606073 0.217269 4.642393  
C 2.500638 0.638989 3.273600  
C 3.888267 0.313683 5.300306  
C 1.334087 3.102094 1.323696  
H 2.229405 3.323684 1.935863  
H 0.758383 4.042209 1.229140  
H 1.654165 2.777435 0.317059  
C 3.623030 1.119461 2.602494  
C 3.535694 1.389393 1.542989  
C 1.493744 -0.302658 5.363222  
H 0.526994 -0.370897 4.850494  
C 5.009227 0.827474 4.584613  
H 5.980849 0.898416 5.096928  
C 1.629917 -0.719261 6.680154  
H 0.759223 -1.119310 7.222178  
C -0.330582 2.600370 3.770692  
H -0.900347 1.917855 4.428500  
H -0.972539 3.476480 3.546591  
H 0.547293 2.961268 4.346033  
C 4.874093 1.219424 3.261562  
H 5.737457 1.605356 2.698055  
C 3.988044 -0.120054 6.656081  
H 4.965488 -0.047383 7.158566  
C 2.888542 -0.626866 7.332799  
H 2.988995 -0.958157 8.377635  
Si -2.362456 0.169429 2.055523  
O -2.910785 -1.040437 0.943674  
C -4.970236 -2.265232 0.689222  
C -3.639782 -2.163000 1.220958  
C -5.708287 -3.488449 0.891880  
C -1.809671 -0.709163 3.627154  
H -2.641622 -1.357199 3.969588  
H -1.608688 0.022567 4.432673  
H -0.916823 -1.340567 3.488413  
C -3.083943 -3.233152 1.918412  
H -2.055069 -3.156045 2.289712  
C -5.553918 -1.219831 -0.078189  
H -4.965792 -0.310969 -0.249023  
C -5.107524 -4.559679 1.616709  
H -5.675819 -5.491441 1.760245  
C -6.819288 -1.363264 -0.627845  
H -7.247973 -0.552469 -1.235963  
C -3.863230 1.168533 2.639893  
H -4.391785 1.742753 1.857927  
H -3.540243 1.881145 3.427230  
H -4.594034 0.471145 3.099945  
C -3.818868 -4.430239 2.111861  
H -3.339805 -5.263057 2.648698  
C -7.011528 -3.595565 0.322485  
H -7.577338 -4.527772 0.478170  
C -7.555747 -2.560059 -0.423602  
H -8.559855 -2.665938 -0.862342  
Si -1.887025 2.401730 -0.000400  
O -0.773458 2.847450 -1.265423  
C -0.366878 4.948750 -2.398851  
C -1.049332 3.683576 -2.310840  
C -0.611056 5.798421 -3.541039  
C -3.472621 1.819242 -0.834462  
H -3.844273 2.597700 -1.528583  
H -4.269991 1.637170 -0.091288  
H -3.312138 0.882854 -1.398312  
C -1.927314 3.310240 -3.328580  
H -2.437022 2.343294 -3.257525  
C 0.550558 5.384827 -1.402855  
H 0.736100 4.727146 -0.547782  
C -1.521277 5.376793 -4.553721  
H -1.699466 6.033351 -5.418797  
C 1.206073 6.602022 -1.515430  
H 1.916536 6.916114 -0.735338  
C -2.280170 4.026485 0.886576  
H -1.376435 4.534608 1.275134  
H -2.973132 3.858859 1.735204  
H -2.771847 4.721661 0.174841  
C -2.163527 4.154406 -4.442618  
H -2.863971 3.821382 -5.224033  
C 0.078311 7.045156 -3.622660  
H -0.109994 7.690294 -4.495117  
C 0.967537 7.441721 -2.635341  
H 1.491270 8.406122 -2.719217  
Si 1.978673 -2.031759 -0.669620  
O 0.454818 -2.392588 0.195996  
C 1.362756 -0.560086 -1.618633  
C -0.007220 -4.595288 -1.119050  
C 0.411622 -3.234382 1.293953

C -0.125853 -5.425672 2.296056  
C 3.264111 -1.768533 0.661407  
H 3.288581 -2.657574 1.323341  
H 4.272861 -1.642723 0.225221  
H 3.051661 -0.875477 1.271628  
C 0.760548 -2.750243 2.548084  
H 1.075675 -1.700961 2.633269  
C -0.327183 -5.153744 -0.151231  
H -0.208650 -4.531698 -1.046363  
C 0.224158 -4.893071 3.571611  
H 0.136667 -5.539601 4.458085  
C -0.783662 -6.458729 -0.263260  
H -1.031244 -6.868045 -1.254245  
C 2.506306 -3.600531 -1.580024  
H 1.810008 -3.957084 -2.358258  
H 3.484180 -3.399718 -2.067153  
H 2.664361 -4.418392 -0.847162  
C 0.673463 -3.587122 3.689974  
H 0.954906 -3.175894 4.671398  
C -0.598104 -6.763120 2.142044  
H -0.693452 -7.391550 3.041393  
C -0.928848 -7.268866 0.894032  
H -1.295936 -8.301671 0.796433  
Si 0.133956 -0.889534 -2.968497  
O -1.393844 -0.796278 -2.032537  
C -3.477429 -1.377328 -3.160369  
C -2.442060 -1.690321 -2.221727  
C -4.551373 -2.329232 -3.331833  
C 0.060615 -2.578177 -3.803515  
H -0.776987 -2.585382 -4.530528  
H 1.002921 -2.763997 -4.358011  
H -0.105699 -3.412402 -3.097021  
C -2.469436 -2.877494 -1.509093  
H -1.679785 -3.066848 -0.775028  
C -3.497341 -0.172997 -3.918811  
H -2.671063 0.536028 -3.792739  
C -4.540711 -3.546116 -2.591218  
H -5.371246 -4.255541 -2.722142  
C -4.536472 0.104614 -4.794592  
H -4.535574 1.045987 -5.365241  
C 0.006005 0.399646 -4.331033  
H -0.224670 1.406122 -3.934520  
H 0.951489 0.661097 -4.906874  
H -0.794471 0.105668 -5.038476  
C -3.515932 -3.812328 -1.697927  
H -3.515207 -4.735606 -1.099422  
C -5.603256 -2.009436 -4.240122  
H -6.426132 -2.731212 -4.360225  
H -5.602867 -0.820215 -4.953657  
H -6.426625 -0.591665 -5.646734  
Si 2.720888 0.603496 -2.148963  
O 3.753302 0.858118 -0.781575  
C 5.588824 2.331638 -0.290840  
C 5.096508 1.051222 -0.729030  
C 7.010038 2.513658 -0.115529  
C 2.219936 2.341374 -2.654559  
H 3.119242 2.990026 -2.646946  
H 1.772353 2.395124 -3.664153  
H 1.482493 2.749321 -1.939410  
C 6.000686 0.029414 -1.022386  
H 5.619176 -0.941187 -1.367074  
C 4.713443 3.422456 -0.025862  
H 3.637185 3.279402 -0.177358  
C 7.897155 1.437478 -0.410953  
H 8.979523 1.584854 -0.277024  
C 5.206362 4.641255 0.416859  
H 4.512470 5.472269 0.616204  
C 3.778194 -0.165450 -3.520714  
H 4.111265 -1.192602 -3.269396  
H 3.183427 -0.231621 -4.455639  
H 4.678446 0.444891 -3.737887  
C 7.395982 0.227589 -0.865377  
H 8.081668 -0.601027 -1.099465  
C 7.480369 3.779258 0.346797  
H 8.564148 3.915992 0.487238  
C 6.601852 4.819583 0.611556  
H 6.985904 5.787626 0.967753

Conformation 28.

Multiplicity: 4

Charge: 0

E(B97-3c) = -6436.938432602682 Hartree

E(M06/def2-TZVP) = -6437.188119901255 Hartree

E(PBE - D3(BJ)/def2-TZVP) = -6434.683396410443 Hartree

E(PBE0 - D3(BJ)/def2-TZVP) = -6435.143035577711 Hartree

E(PBEh-3c) = -6428.331893773785 Hartree

E(PM6) = -185.07246 Kcal/mol

E(PM7) = -366.33415 Kcal/mol

E( $\omega$ B97X-V/def2-TZVP) = -6440.922791451552 Hartree

E(GFN1-xTB) = -241.626167162324 Hartree

E(GFN2-xTB) = -236.802744885602 Hartree



E(GFN-FF) = -31.312004550772 Hartree

Coordinates:

|    |           |           |           |
|----|-----------|-----------|-----------|
| Co | 0.614867  | -0.324012 | 0.771282  |
| Si | 1.554530  | 1.553354  | 2.747856  |
| O  | -0.106768 | 1.035352  | 2.352629  |
| C  | 2.440714  | 0.639043  | 1.397542  |
| C  | -1.958803 | 2.476244  | 3.054221  |
| C  | -1.189669 | 1.273091  | 3.195150  |
| C  | -3.076413 | 2.681204  | 3.946835  |
| C  | 1.809333  | 1.059468  | 4.551391  |
| H  | 1.150318  | 1.684221  | 5.187766  |
| H  | 2.859573  | 1.252663  | 4.851211  |
| H  | 1.578877  | 0.000526  | 4.768228  |
| C  | -1.510714 | 0.347120  | 4.179758  |
| H  | -0.907534 | -0.562080 | 4.272526  |
| C  | -1.681989 | 3.464375  | 2.070531  |
| H  | -0.840417 | 3.302386  | 1.391288  |
| C  | -3.373782 | 1.708192  | 4.944007  |
| H  | -4.232690 | 1.878617  | 5.610042  |
| C  | -2.474380 | 4.595919  | 1.949191  |
| H  | -2.256226 | 5.333021  | 1.162471  |
| C  | 1.569211  | 3.432496  | 2.755026  |
| H  | 1.316491  | 3.890732  | 1.783228  |
| H  | 2.571387  | 3.792982  | 3.065850  |
| H  | 0.831759  | 3.784247  | 3.504376  |
| C  | -2.603435 | 0.563699  | 5.056930  |
| H  | -2.834007 | -0.192882 | 5.822083  |
| C  | -3.869048 | 3.855511  | 3.793209  |
| H  | -4.731284 | 3.993961  | 4.463032  |
| C  | -3.580147 | 4.793997  | 2.814742  |
| H  | -4.215438 | 5.683902  | 2.696204  |
| Si | 3.620944  | 1.610672  | 0.332226  |
| O  | 5.071005  | 1.507664  | 1.285598  |
| C  | 6.984290  | 2.368902  | 2.397200  |
| C  | 6.269038  | 2.128914  | 1.171408  |
| C  | 8.282850  | 2.991629  | 2.340694  |
| C  | 3.924886  | 0.827612  | -1.369598 |
| H  | 3.908401  | 1.607032  | -2.157672 |
| H  | 3.141183  | 0.085763  | -1.609161 |
| H  | 4.903923  | 0.313211  | -1.419613 |
| C  | 6.829182  | 2.513873  | -0.047131 |
| H  | 6.284671  | 2.323097  | -0.982723 |
| C  | 6.433233  | 2.012717  | 3.660447  |
| H  | 5.434250  | 1.553821  | 3.678270  |
| C  | 8.824286  | 3.367643  | 1.075687  |
| H  | 9.815449  | 3.844343  | 1.038555  |
| C  | 7.137440  | 2.248262  | 4.833121  |
| H  | 6.700844  | 1.970090  | 5.804523  |
| C  | 3.356503  | 3.455959  | 0.033247  |
| H  | 3.474625  | 4.061548  | 0.949870  |
| H  | 2.366894  | 3.673187  | -0.414217 |
| H  | 4.129848  | 3.789357  | -0.688259 |
| C  | 8.105135  | 3.134143  | -0.086247 |
| H  | 8.524083  | 3.426295  | -1.061364 |
| C  | 8.978616  | 3.215000  | 3.565983  |
| H  | 9.972805  | 3.687277  | 3.526811  |
| C  | 8.422825  | 2.851124  | 4.783987  |
| H  | 8.976647  | 3.033201  | 5.717645  |
| Si | 3.221180  | -0.993323 | 1.824298  |
| O  | 1.745879  | -1.989280 | 1.614232  |
| C  | 1.010444  | -3.690898 | 3.171801  |
| C  | 1.652856  | -3.327448 | 1.944397  |
| C  | 0.880840  | -5.089241 | 3.500108  |
| C  | 4.518600  | -1.695870 | 0.652899  |
| H  | 4.750525  | -2.733825 | 0.966470  |
| H  | 5.447195  | -1.097678 | 0.745132  |
| H  | 4.216345  | -1.710225 | -0.409051 |
| C  | 2.171715  | -4.305591 | 1.103105  |
| H  | 2.659180  | -4.006953 | 0.166209  |
| C  | 0.510090  | -2.716917 | 4.076934  |
| H  | 0.624119  | -1.659946 | 3.805583  |
| C  | 1.407730  | -6.067138 | 2.606859  |
| H  | 1.304414  | -7.132613 | 2.861925  |
| C  | -0.104599 | -3.092070 | 5.261658  |
| H  | -0.483010 | -2.324260 | 5.954161  |
| C  | 3.870507  | -1.393315 | 3.546935  |
| H  | 3.139125  | -1.273914 | 4.363970  |
| H  | 4.746975  | -0.747089 | 3.759496  |
| H  | 4.221874  | -2.445644 | 3.552157  |
| C  | 2.045634  | -5.678617 | 1.439067  |
| H  | 2.454700  | -6.435151 | 0.753062  |
| C  | 0.235055  | -5.441282 | 4.722759  |
| H  | 0.130304  | -6.508412 | 4.972791  |
| C  | -0.247071 | -4.468095 | 5.585355  |
| H  | -0.739161 | -4.759810 | 6.525271  |
| Si | -0.044095 | -2.277974 | -1.764203 |
| O  | -0.833450 | -2.193992 | -3.304776 |
| C  | -0.560586 | -0.727636 | -0.853631 |
| C  | -1.705173 | -3.873544 | -4.788179 |
| C  | -0.638144 | -2.995934 | -4.387412 |

|    |           |           |           |
|----|-----------|-----------|-----------|
| C  | -1.541579 | -4.678777 | -5.974294 |
| C  | -0.597669 | -3.940230 | -1.061443 |
| H  | -0.317809 | -4.721119 | -1.799323 |
| H  | -0.103667 | -4.190689 | -0.103299 |
| H  | -1.693940 | -3.999199 | -0.920951 |
| C  | 0.531680  | -2.937864 | -5.145112 |
| H  | 1.330980  | -2.247118 | -4.845515 |
| C  | -2.923919 | -3.552018 | -4.057591 |
| H  | -3.038320 | -3.319937 | -3.168665 |
| C  | -0.325988 | -4.598136 | -6.714668 |
| H  | -0.208570 | -5.216795 | -7.617313 |
| C  | -3.950874 | -4.786482 | -4.474654 |
| H  | -4.890737 | -4.828186 | -3.903602 |
| C  | 1.816892  | -2.376359 | -2.067992 |
| H  | 2.175015  | -1.544445 | -2.703075 |
| H  | 2.346832  | -2.315056 | -1.099100 |
| H  | 2.091297  | -3.331799 | -2.558148 |
| C  | 0.684194  | -3.742937 | -6.302852 |
| H  | 1.618177  | -3.673035 | -6.881184 |
| C  | -2.617445 | -5.527799 | -6.371156 |
| H  | -2.494720 | -6.140450 | -7.278129 |
| C  | -3.796146 | -5.581906 | -5.641478 |
| H  | -4.615896 | -6.240282 | -5.967303 |
| Si | -2.220895 | -0.982911 | -0.011551 |
| O  | -2.736232 | 0.588948  | 0.485722  |
| C  | -4.587007 | 2.104856  | 0.525252  |
| C  | -3.935142 | 0.928075  | 1.033495  |
| C  | -5.791794 | 2.570925  | 1.165341  |
| C  | -2.009029 | -2.079599 | 1.521099  |
| H  | -2.980009 | -2.507773 | 1.843968  |
| H  | -1.324930 | -2.926597 | 1.325206  |
| H  | -1.603221 | -1.504363 | 2.375723  |
| C  | -4.517678 | 0.214191  | 2.080381  |
| H  | -4.010232 | -0.672504 | 2.479195  |
| C  | -4.076386 | 2.811940  | -0.597840 |
| H  | -3.200581 | 2.398520  | -1.111495 |
| C  | -6.344294 | 1.824957  | -2.247651 |
| H  | -7.268615 | 2.182381  | 2.726630  |
| C  | -4.699662 | 3.964031  | -1.055087 |
| H  | -4.305220 | 4.385397  | -1.941420 |
| C  | -3.628329 | -1.640536 | -1.074528 |
| H  | -3.646103 | -1.114025 | -2.047299 |
| H  | -3.549071 | -2.731362 | -1.246493 |
| H  | -4.587191 | -1.450533 | -0.549147 |
| C  | -5.723175 | 0.662960  | 2.677025  |
| H  | -6.149663 | 0.083270  | 3.509977  |
| C  | -6.394986 | 3.769066  | 0.681185  |
| H  | -7.307378 | 4.134740  | 1.178371  |
| C  | -5.858286 | 4.456870  | -0.398038 |
| H  | -6.343795 | 5.376020  | -0.760830 |
| Si | -0.528845 | 0.765516  | -1.992895 |
| O  | -2.095251 | 0.887731  | -2.714486 |
| C  | -2.970729 | 1.005627  | -4.945672 |
| C  | -2.445479 | 1.662117  | -3.778981 |
| C  | -3.408654 | 1.808853  | -6.061176 |
| C  | 0.669526  | 0.742600  | -3.446739 |
| H  | 0.483695  | 1.661486  | -4.040670 |
| H  | 1.727743  | 0.757826  | -3.124345 |
| H  | 0.494138  | -0.128169 | -4.105517 |
| C  | -2.346125 | 3.053463  | -3.749348 |
| H  | -1.954241 | 3.546261  | -2.848810 |
| C  | -3.058416 | -0.412459 | -5.027542 |
| H  | -2.689441 | -1.004202 | -4.179687 |
| C  | -3.298463 | 3.229086  | -5.989533 |
| H  | -3.634531 | 3.834570  | -6.845140 |
| C  | -3.569354 | -1.026459 | -6.162575 |
| H  | -3.624782 | -2.124356 | -6.210889 |
| C  | -0.215220 | 2.333554  | -0.994754 |
| H  | -1.081629 | 2.505878  | -0.332111 |
| H  | 0.681913  | 2.201300  | -0.356402 |
| H  | -0.054605 | 3.219625  | -1.640457 |
| C  | -2.772489 | 3.831348  | -4.857214 |
| H  | -2.686402 | 4.927762  | -4.804181 |
| H  | -3.933238 | 1.143266  | -7.208718 |
| C  | -4.272149 | 1.753838  | -8.060595 |
| C  | -4.014239 | -0.240980 | -7.259155 |
| H  | -4.419784 | -0.735603 | -8.155228 |

Conformation 31.

Multiplicity: 4

Charge: 0

E(B97-3c) = -6436.936324584732 Hartree

E(M06/def2-TZVP) = -6437.184131578867 Hartree

E(PBE - D3(BJ)/def2-TZVP) = -6434.682408766176 Hartree

E(PBE0 - D3(BJ)/def2-TZVP) = -6435.140825979824 Hartree

E(PBEh-3c) = -6428.328955652247 Hartree

E(PM6) = -195.38077 Kcal/mol

E(PM7) = -367.51279 Kcal/mol

E( $\omega$ B97X-V/def2-TZVP) = -6440.928890958168 Hartree

E(GFN1-xTB) = -241.620047850786 Hartree

E(GFN2-xTB) = -236.792528519718 Hartree

E(GFN-FF) = -31.239605509369 Hartree

Coordinates:

Co  
-0.578519 -0.780766 0.502491  
Si -1.420593 -3.176036 -1.650673  
O -0.794595 -2.182519 -2.922356  
C -2.071473 -2.030546 -0.312073  
C -0.613515 -2.466504 -5.314127  
C -0.047008 -2.574481 -3.996251  
C 0.194765 -2.832411 -6.453641  
C -0.025708 -4.343368 -1.151181  
H 0.308633 -4.896958 -2.051040  
H -0.358172 -5.090696 -0.407693  
H 0.844721 -3.802311 -0.739816  
C 1.268404 -3.014108 -3.846004  
H 1.699747 -3.071175 -2.838932  
C -1.941556 -2.003316 -5.530065  
H -2.537900 -1.709996 -4.659372  
C 1.531542 -3.284851 -6.253774  
H 2.139275 -3.558174 -7.129585  
C -2.464592 -1.909702 -6.811604  
H -3.492989 -1.546173 -6.959011  
C -2.745297 -4.273717 -2.438593  
H -3.591024 -3.701590 -2.864818  
H -3.154967 -4.985927 -1.692697  
H -2.291470 -4.862676 -3.262265  
C 2.052690 -3.368771 -4.972922  
H 3.087934 -3.707900 -4.816245  
C -0.376907 -2.724170 -7.756203  
H 0.240867 -3.003743 -8.623965  
C -1.676822 -2.275597 -7.935038  
H -2.098773 -2.197803 -8.948644  
Si -3.683695 -1.229592 -0.823944  
O -3.796568 0.248337 0.080047  
C -5.827958 1.345123 0.794670  
C -4.724174 1.233793 -0.119848  
C -6.757931 2.437647 0.632955  
C -3.871762 -0.751813 -2.635010  
H -4.784310 -0.131586 -2.743572  
H -4.010036 -1.652742 -3.262760  
H -3.008883 -0.181723 -3.023091  
C -4.571913 2.165687 -1.145142  
H -3.718428 2.070600 -1.830491  
C -6.023738 0.421311 1.860308  
H -5.303663 -0.396108 1.982999  
C -6.568544 3.368625 -0.429384  
H -7.282223 4.198396 -0.545049  
C -7.089746 0.561255 2.737311  
H -7.222998 -0.159088 3.558693  
C -5.231226 -2.247785 -0.422439  
H -5.273392 -2.621788 0.618177  
H -5.283458 -3.124876 -1.099825  
H -6.139124 -1.632905 -0.593296  
C -5.497064 3.229363 -1.297911  
H -5.349226 3.951527 -2.114977  
C -7.841693 2.549854 1.554272  
H -8.549259 3.384854 1.431942  
C -8.007191 1.634917 2.583477  
H -8.849478 1.739960 3.284090  
Si -2.158875 -2.884278 1.343554  
O -0.480971 -2.512131 1.823002  
C 1.008520 -3.745294 3.283757  
C 0.053074 -2.693948 3.090589  
C 1.614446 -3.887404 4.587054  
C -3.262269 -2.109038 2.655437  
H -2.990844 -2.517518 3.649565  
H -4.323317 -2.369101 2.472652  
H -3.173453 -1.007421 2.693731  
C -0.294139 -1.848190 4.136060  
H -1.007852 -1.034917 3.963150  
C 1.389043 -4.637563 2.242682  
H 0.921664 -4.526123 1.258431  
C 1.239925 -2.998564 5.636969  
H 1.712174 -3.114126 6.624368  
C 2.331849 -5.630375 2.466941  
H 2.615597 -6.309942 1.649129  
C -2.423831 -4.744530 1.500166  
H -1.850386 -5.367321 0.791066  
H -3.502851 -4.956468 1.347676  
H -2.163090 -5.063206 2.530799  
C 0.302266 -2.003483 5.413633  
H 0.021140 -1.306300 6.216431  
C 2.579589 -4.919706 4.779563  
H 3.042293 -5.025617 5.773141  
C 2.933868 -5.772604 3.745046  
H 3.682406 -6.561642 3.912747  
Si 1.035565 1.110664 -1.908098  
O 1.363410 2.805327 -1.703262  
C 0.924324 0.482076 -0.138251  
C 1.958891 4.527046 -3.270446  
C 2.332691 3.591193 -2.246147

C 2.974632 5.389608 -3.826295  
C -0.601747 1.059090 -2.827580  
H -0.481101 1.485109 -3.844379  
H -0.925614 0.005061 -2.922356  
H -1.384211 1.634027 -2.297270  
C 3.649892 3.527861 -1.798105  
H 3.899386 2.798005 -1.017149  
C 0.621020 4.627727 -3.747706  
H -0.140009 3.968595 -3.306952  
C 4.314042 5.294428 -3.345732  
H 5.082174 5.955281 -3.775889  
C 0.288830 5.536628 -4.742414  
H -0.748947 5.603563 -5.103312  
C 2.377231 0.399719 -3.013819  
H 3.378271 0.451287 -2.547444  
H 2.147878 -0.649332 -3.286002  
H 2.400540 0.987878 -3.954272  
C 4.636820 4.382565 -2.351429  
H 5.670197 4.310008 -1.978738  
C 2.594713 6.311334 -4.846955  
H 3.368027 6.969461 -5.273797  
C 1.284679 6.384532 -5.297438  
H 1.013150 7.102546 -6.086498  
Si 0.243784 1.869772 0.904715  
O -0.566462 0.806458 2.099816  
C -0.816791 1.610861 4.383312  
C -1.382556 1.309080 3.098555  
C -1.687965 2.145908 5.404606  
C -1.169220 2.882276 0.194037  
H -1.614242 3.513705 0.989324  
H -0.799917 3.541702 -0.614574  
H -1.970481 2.232375 -0.204011  
C -2.735693 1.508089 2.856546  
H -3.129779 1.245197 1.867996  
C 0.553297 1.381472 4.694508  
H 1.198007 0.936741 3.928881  
C -3.069347 2.349924 5.116313  
H -3.720792 2.760782 5.902726  
C 1.058745 1.684723 5.950054  
H 2.119873 1.494620 6.171450  
C 1.413619 3.034078 1.803010  
H 2.199351 2.518592 2.383223  
H 1.903170 3.667070 1.034344  
H 0.848914 3.693054 2.492825  
C -3.581306 2.029483 3.869083  
H -4.648645 2.173660 3.644945  
C -1.131342 2.448113 6.683186  
H -1.795340 2.861017 7.458642  
C 0.211462 2.228215 6.952219  
H 0.621641 2.468845 7.944793  
Si 2.512279 -0.283214 0.462954  
O 3.797251 0.744434 -0.089795  
C 5.890249 1.374425 0.907967  
C 5.137509 0.534936 0.014577  
H 7.317874 1.189344 1.004785  
C 2.799953 -2.014740 -0.222251  
H 3.830562 -2.355058 0.001080  
H 2.106886 -2.709137 0.292286  
C 2.629999 -2.075838 0.131344  
H 5.795283 -0.417127 -1.316426  
H 5.213157 -1.026470 -1.469399  
C 5.265389 2.388479 1.687717  
H 4.182307 2.533110 1.583913  
C 7.950313 0.190493 0.207901  
H 9.039631 0.054831 0.287604  
C 6.010373 3.185950 2.544669  
H 5.513136 3.968611 3.137622  
C 2.765607 -0.424632 2.326569  
H 2.941133 0.558553 2.802430  
H 1.914255 -0.920074 2.830981  
H 3.669799 -1.041244 2.508006  
H 7.199761 -0.587429 -0.660484  
H 7.692366 -1.348026 -1.285502  
C 8.050403 2.025120 1.899589  
H 9.139972 1.883480 1.976382  
C 7.414330 2.999508 2.654719  
H 7.998510 3.635647 3.337159

Conformation 32.  
Multiplicity: 4  
Charge: 0  
E(B97-3c) = -6436.926851401521 Hartree  
E(M06/def2-TZVP) = -6437.182742327684 Hartree  
E(PBE - D3(BJ)/def2-TZVP) = -6434.673450978057 Hartree  
E(PBE0 - D3(BJ)/def2-TZVP) = -6435.128781344029 Hartree  
E(PBEh-3c) = -6428.311076536419 Hartree  
E(PM6) = -200.04709 Kcal/mol  
E(PM7) = -377.90056 Kcal/mol  
E( $\omega$ B97X-V/def2-TZVP) = -6440.914021354466 Hartree  
E(GFN1-xTB) = -241.619813306696 Hartree  
E(GFN2-xTB) = -236.787893830313 Hartree

E(GFN-FF) = -31.249358800879 Hartree

Coordinates:

Co 0.091996 0.422823 0.157372  
Si -2.658438 0.512776 0.380856  
O -1.429894 1.562082 1.154541  
C -1.475070 -0.891578 0.034426  
C -1.590522 2.956142 3.119562  
C -1.625378 2.823424 1.694352  
C -1.753205 4.269594 3.692799  
C -3.347849 1.478251 -1.079165  
H -3.838573 2.402109 -0.712504  
H -4.101359 0.851999 -1.594586  
H -2.578475 1.762804 -1.821204  
C -1.842616 3.932647 0.884940  
H -1.885428 3.809327 -0.203631  
C -1.413709 1.839795 3.982183  
H -1.307843 0.845381 3.534727  
C -1.940023 5.391036 2.834109  
H -2.035637 6.392514 3.278714  
C -1.389167 2.002770 5.359755  
H -1.254917 1.126605 6.012362  
C -4.053525 0.310631 1.620246  
H -3.727661 -0.096104 2.594293  
H -4.817054 -0.368275 1.189099  
H -4.526838 1.297835 1.798591  
C -1.992214 5.220585 1.460654  
C -2.131589 6.088535 0.799805  
C -1.718309 4.399797 5.111782  
H -1.831257 5.404343 5.547293  
C -1.542193 3.294057 5.930091  
H -1.519343 3.415413 7.023649  
Si -1.369683 -2.226191 1.342081  
O -2.813032 -3.157694 1.136503  
C -4.168477 -4.332610 2.740803  
C -3.156451 -4.340765 1.719013  
C -4.585591 -5.586083 3.321855  
C 0.151284 -3.318818 1.092982  
H -0.093624 -4.308000 0.664952  
H 0.679372 -3.488083 2.052683  
H 0.838045 -2.816169 0.387130  
C -2.613032 -5.550889 1.290049  
H -1.871182 -5.549824 0.480019  
C -4.781295 -3.125431 3.180079  
H -4.469849 -2.184684 2.710187  
C -3.993619 -6.800641 2.866579  
H -4.317962 -7.752765 3.313352  
C -5.757776 -3.141213 4.165393  
H -6.224572 -2.199357 4.491621  
C -1.361644 -1.741029 3.167323  
H -2.201698 -1.095838 3.482366  
H -0.409222 -1.255187 3.456134  
H -1.440911 -2.686136 3.745164  
C -3.031728 -6.776188 1.868439  
H -2.586166 -7.715547 1.507339  
C -5.590160 -5.563297 4.334909  
H -5.907106 -6.519190 4.780741  
C -6.162914 -4.370526 4.750857  
H -6.937872 -4.374766 5.532484  
Si -1.741167 -1.624370 -1.675563  
O -3.456087 -1.526080 -1.886238  
C -5.022214 -3.250064 -2.481781  
C -4.189084 -2.141423 -2.859122  
C -5.823306 -3.894627 -3.493099  
C -0.885179 -0.628399 -3.029688  
H -1.066427 -1.092660 -4.020228  
H 0.205909 -0.666924 -2.835334  
H -1.209116 0.429043 -3.078383  
C -4.170107 -1.695237 -4.179022  
H -3.539764 -0.833697 -4.442580  
C -5.067881 -3.723823 -1.140415  
H -4.448143 -3.219188 -0.387555  
C -5.773055 -3.415119 -4.835766  
H -6.386147 -3.912484 -5.602906  
C -5.868642 -4.805556 -0.800857  
H -5.885392 -5.167229 0.238873  
C -1.258691 -3.421544 -1.937212  
H -1.791344 -4.098718 -1.244043  
H -0.166041 -3.566433 -1.833572  
H -1.541991 -3.706306 -2.971502  
C -4.964193 -2.337914 -5.164853  
H -4.932240 -1.968609 -6.201455  
C -6.637369 -5.000198 -3.105269  
H -7.250834 -5.496602 -3.873766  
C -6.658972 -5.447606 -1.791654  
H -7.291175 -6.305081 -1.513977  
Si 3.112951 -0.856858 -0.606280  
O 2.132312 -1.879189 -1.606221  
C 2.083421 0.653496 -0.201197  
C 2.726845 -4.089387 -2.421618  
C 2.526227 -2.681818 -2.642775

C 3.074672 -4.926367 -3.547140  
C 3.647643 -1.902327 0.879351  
H 4.285514 -2.729291 0.506718  
H 4.256198 -1.307567 1.590559  
H 2.806535 -2.350954 1.439236  
C 2.676067 -2.154135 -3.923406  
H 2.514844 -1.080435 -4.074983  
C 2.587927 -4.689451 -1.138018  
H 2.315171 -4.053632 -0.289223  
C 3.219626 -4.345149 -4.840176  
H 3.485858 -4.992900 -5.689138  
C 2.776879 -6.052433 -0.959982  
H 2.659700 -6.494768 0.041033  
C 4.725742 -0.499277 -1.520139  
H 4.630905 0.171192 -2.392690  
H 5.435546 -0.027982 -0.809680  
H 5.175920 -1.452689 -1.865423  
C 3.024339 -2.984959 -5.017746  
H 3.134462 -2.534699 -6.015968  
C 3.263101 -6.323197 -3.326056  
H 3.526633 -6.957802 -4.186640  
C 3.117679 -6.878055 -2.063678  
H 3.265183 -7.958575 -1.915187  
Si 2.018324 1.938278 -1.568691  
O 3.262612 3.091310 -1.235618  
C 5.144091 4.086891 -2.334373  
C 3.731135 4.059099 -2.071520  
C 5.676321 5.124411 -3.183735  
C 0.327982 2.781566 -1.517519  
H 0.178100 3.460463 -2.381841  
H -0.484649 2.023569 -1.578204  
H 0.202297 3.350373 -0.579157  
C 2.898412 5.020964 -2.643169  
H 1.821375 4.998565 -2.427227  
C 6.026908 3.114899 -1.785218  
H 5.603214 2.328382 -1.147164  
H 4.792975 6.092024 -3.746737  
H 5.206445 6.880562 -4.393579  
H 7.387211 3.158512 -2.055605  
C 8.057933 2.398939 -1.626009  
C 2.279926 1.449161 -3.369296  
H 3.265552 0.996904 -3.581887  
H 1.482198 0.767007 -3.719013  
H 2.207776 2.382250 -3.965740  
H 3.434100 6.033797 -3.479949  
C 2.753521 6.781708 -3.914998  
C 7.080186 5.139455 -3.436379  
H 7.488649 5.932283 -4.082490  
H 7.918407 4.180606 -2.886620  
H 8.998837 4.209319 -3.094822  
Si 2.548160 1.366265 1.471536  
O 1.663752 2.852416 1.533370  
C 1.549995 5.175722 2.081925  
C 1.660124 3.806173 2.505581  
C 1.420858 6.209203 3.079166  
C 4.353531 1.828116 1.736322  
H 4.472422 2.336536 2.175075  
H 5.020322 0.942524 1.727515  
H 4.671580 2.525885 0.937693  
C 1.717456 3.506808 3.867168  
H 1.784916 2.462698 4.194691  
C 1.578777 5.536093 0.707022  
H 1.758103 4.742779 -0.0272107  
C 1.470592 5.861540 4.460119  
H 1.378630 6.656129 5.216107  
C 1.433297 6.858960 0.315231  
H 1.480449 7.123227 -0.752256  
C 1.915119 0.253112 2.871602  
H 0.879750 0.546273 3.135024  
H 1.910346 -0.813574 2.581573  
C 2.535217 0.352423 3.786007  
C 1.631052 4.537360 4.836225  
H 1.665042 4.265275 5.901719  
C 1.257213 7.556852 2.640051  
H 1.145334 8.346172 3.400147  
C 1.251825 7.876228 1.290024  
H 1.130004 8.923172 0.972316

Conformation 5.

Multiplicity: 4

Charge: 0

E(B97-3c) = -6436.931627283002 Hartree

E(M06/def2-TZVP) = -6437.186463712576 Hartree

E(PBE - D3(BJ)/def2-TZVP) = -6434.677929941017 Hartree

E(PBE0 - D3(BJ)/def2-TZVP) = -6435.133346286145 Hartree

E(PBEh-3c) = -6428.314276683425 Hartree

E(PM6) = -201.67427 Kcal/mol

E(PM7) = -375.26832 Kcal/mol

E( $\omega$ B97X-V/def2-TZVP) = -6440.919556404367 Hartree

E(GFN1-xTB) = -241.620647810536 Hartree

E(GFN2-xTB) = -236.792347449177 Hartree

E(GFN-FF) = -31.251117299767 Hartree

Coordinates:

|    |           |           |           |
|----|-----------|-----------|-----------|
| Co | -0.457656 | 0.165330  | -0.100154 |
| Si | 0.418786  | 2.753575  | 0.258132  |
| O  | 0.090691  | 1.853944  | -1.259339 |
| C  | 0.596645  | 1.219179  | 1.322497  |
| C  | 0.768432  | 2.385779  | -3.515277 |
| C  | -0.225819 | 2.418731  | -2.486413 |
| C  | 0.443777  | 2.952310  | -4.801626 |
| C  | -1.077316 | 3.863178  | 0.530152  |
| H  | -1.175671 | 4.557619  | -0.327998 |
| H  | -0.922438 | 4.453961  | 1.452562  |
| H  | -2.025969 | 3.303578  | 0.634037  |
| C  | -1.469516 | 2.993921  | -2.719229 |
| H  | -2.218389 | 3.009254  | -1.918793 |
| C  | 2.053255  | 1.809472  | -3.313770 |
| H  | 2.290137  | 1.389130  | -2.329486 |
| C  | -0.844705 | 3.521495  | -5.012715 |
| H  | -1.090408 | 3.929879  | -6.004029 |
| C  | 2.986272  | 1.780656  | -4.340177 |
| H  | 3.974901  | 1.328636  | -4.168227 |
| C  | 1.884602  | 3.873610  | -0.081886 |
| H  | 2.788981  | 3.335170  | -0.416690 |
| H  | 2.123826  | 4.431683  | 0.845867  |
| H  | 1.603958  | 4.604735  | -0.867364 |
| C  | -1.778292 | 3.542314  | -3.989948 |
| H  | -2.779329 | 3.964101  | -4.161323 |
| C  | 1.428556  | 2.907649  | -5.831025 |
| H  | 1.175826  | 3.331528  | -6.814937 |
| C  | 2.671614  | 2.334260  | -5.609894 |
| H  | 3.417655  | 2.306010  | -6.418471 |
| Si | 2.342662  | 0.547072  | 1.473606  |
| O  | 3.148701  | 1.668759  | 2.517145  |
| C  | 5.378830  | 2.492812  | 2.835419  |
| C  | 4.343077  | 1.548662  | 3.158531  |
| C  | 6.624139  | 2.441600  | 3.562200  |
| C  | 2.447301  | -1.181501 | 2.203086  |
| H  | 3.511002  | -1.462617 | 2.340126  |
| H  | 2.002527  | -1.905698 | -1.491319 |
| H  | 1.933747  | -1.289761 | 3.175724  |
| C  | 4.557807  | 0.598635  | 4.156669  |
| H  | 3.754200  | -0.104466 | 4.412403  |
| C  | 5.197981  | 3.488745  | 1.834881  |
| H  | 4.241734  | 3.518249  | 1.298450  |
| C  | 6.808556  | 1.448443  | 4.568094  |
| H  | 7.762508  | 1.413188  | 5.115720  |
| C  | 6.198815  | 4.409290  | 1.558810  |
| H  | 6.041492  | 5.177313  | 0.786363  |
| C  | 3.400853  | 0.473394  | -0.086675 |
| H  | 3.518814  | 1.443805  | -0.602597 |
| H  | 3.014369  | -0.271798 | -0.809002 |
| H  | 4.413519  | 0.140475  | 0.222816  |
| C  | 5.792729  | 0.549379  | 4.852547  |
| H  | 5.932670  | -0.211702 | 5.635288  |
| C  | 7.631252  | 3.402767  | 3.249878  |
| H  | 8.581208  | 3.366742  | 3.805986  |
| C  | 7.425902  | 4.366627  | 2.273428  |
| H  | 8.214388  | 5.101490  | 2.050256  |
| Si | -0.161615 | 1.549793  | 3.006751  |
| O  | 0.172860  | 3.228724  | 3.254297  |
| C  | 1.241811  | 4.551818  | 4.945671  |
| C  | 0.052040  | 3.955919  | 4.401736  |
| C  | 1.131707  | 5.361057  | 6.134690  |
| C  | -2.032553 | 1.269267  | 3.046148  |
| H  | -2.423886 | 1.418945  | 4.072604  |
| H  | -2.253600 | 0.222914  | 2.754154  |
| H  | -2.587289 | 1.943019  | 2.364974  |
| C  | -1.181223 | 4.162904  | 5.017124  |
| H  | -2.084013 | 3.719298  | 4.574042  |
| C  | 2.517101  | 4.359997  | 4.342524  |
| H  | 2.582066  | 3.722829  | 3.450212  |
| C  | -0.145994 | 5.543934  | 6.742344  |
| H  | -0.220777 | 6.160103  | 7.651407  |
| C  | 3.650891  | 4.948086  | 4.886465  |
| H  | 4.630351  | 4.787393  | 4.411555  |
| C  | 0.556491  | 0.678946  | 4.514282  |
| H  | 1.647616  | 0.841876  | 4.595218  |
| H  | 0.342084  | -0.407581 | 4.528314  |
| H  | 0.080526  | 1.129416  | 5.410143  |
| C  | -1.273662 | 4.955456  | 6.191263  |
| H  | -2.258687 | 5.103423  | 6.659936  |
| C  | 2.318546  | 5.949326  | 6.663928  |
| H  | 2.238560  | 6.568140  | 7.571630  |
| C  | 3.549157  | 5.749468  | 6.054802  |
| H  | 4.454041  | 6.210870  | 6.479312  |
| Si | -0.801898 | -3.065308 | 0.641127  |
| O  | 0.858843  | -3.492207 | 0.387022  |
| C  | -1.242946 | -1.666547 | -0.517211 |
| C  | 2.015712  | -5.416466 | 1.286197  |
| C  | 1.384182  | -4.736710 | 0.187967  |

|    |           |           |           |
|----|-----------|-----------|-----------|
| C  | 2.581587  | -6.725551 | 1.057943  |
| C  | -1.779129 | -4.657950 | 0.379482  |
| H  | -1.424627 | -5.434620 | 1.088009  |
| H  | -2.862251 | -4.502309 | 0.551632  |
| H  | -1.652692 | -5.055590 | -0.645969 |
| C  | 1.348850  | -5.330776 | -1.071591 |
| H  | 0.880412  | -4.786161 | -1.901922 |
| C  | 2.106452  | -4.840761 | 2.585741  |
| H  | 1.699923  | -3.833892 | 2.743149  |
| C  | 2.511820  | -7.305387 | -0.242628 |
| H  | 2.944992  | -8.304013 | -0.405063 |
| C  | 2.718381  | -5.525164 | 3.626262  |
| H  | 2.784567  | -5.063020 | 4.622962  |
| C  | -0.912628 | -2.545149 | 2.451103  |
| H  | -0.360386 | -1.600539 | 2.616837  |
| H  | -1.962676 | -2.391930 | 2.764742  |
| H  | -0.475430 | -3.326250 | 3.104523  |
| H  | 1.911206  | -6.615051 | -1.283581 |
| C  | 1.864571  | -7.060177 | -2.289137 |
| C  | 3.199682  | -7.399724 | 2.152788  |
| H  | 3.628860  | -8.398804 | 1.978048  |
| C  | 3.266337  | -6.817343 | 3.409584  |
| H  | 3.748901  | -7.353566 | 4.240853  |
| Si | -3.043901 | -1.181528 | -0.400090 |
| O  | -3.882799 | -3.886825 | -1.732070 |
| C  | -5.793719 | -3.310400 | -1.988520 |
| C  | -5.233954 | -1.991838 | -1.877176 |
| C  | -7.216740 | -3.449325 | -2.179337 |
| C  | -3.152855 | 0.705071  | -0.527305 |
| H  | -4.171007 | 1.076156  | -0.289078 |
| H  | -2.478332 | 1.194317  | 0.215084  |
| H  | -2.866127 | 1.041542  | -1.540224 |
| C  | -6.062807 | -0.872868 | -1.947238 |
| H  | -5.620840 | 0.130592  | -1.872872 |
| C  | -4.982546 | -4.477573 | -1.908303 |
| H  | -3.901184 | -4.353445 | -1.763376 |
| C  | -8.032197 | -2.281380 | -2.249172 |
| H  | -9.116967 | -2.395919 | -2.395281 |
| H  | -5.547063 | -5.740929 | -2.012680 |
| C  | -4.908473 | -6.634967 | -1.947861 |
| C  | -4.035010 | -1.689040 | 1.123495  |
| H  | -4.009621 | -2.776839 | 1.326130  |
| H  | -3.702566 | -1.149044 | 2.031123  |
| H  | -5.093207 | -1.409871 | 0.938732  |
| H  | -7.461584 | -1.023430 | -2.133072 |
| C  | -8.092767 | -0.123300 | -2.188383 |
| C  | -7.760313 | -4.763888 | -2.285693 |
| H  | -8.846224 | -4.872860 | -2.433429 |
| H  | -6.947164 | -5.884838 | -2.204340 |
| H  | -7.386554 | -6.890534 | -2.288034 |
| Si | -0.623794 | -1.912799 | -2.270896 |
| O  | -1.258422 | -3.052551 | -3.095005 |
| C  | -2.362808 | 0.288882  | -5.055189 |
| C  | -1.186291 | -0.248448 | -4.427327 |
| C  | -2.293805 | 0.704241  | -6.434251 |
| C  | -1.306343 | -3.387708 | -3.222664 |
| H  | -0.933122 | -3.358294 | -4.266944 |
| H  | -1.014539 | -4.360463 | -2.781003 |
| H  | -2.411148 | -3.323997 | -3.240183 |
| C  | -0.023703 | -0.427838 | -5.177424 |
| H  | 0.881997  | -0.815515 | -4.695963 |
| C  | -3.590785 | 0.417692  | -4.350373 |
| H  | -3.637753 | 0.025162  | -3.328115 |
| C  | -1.084641 | 0.513404  | -7.164097 |
| H  | -1.041604 | 0.824058  | -8.219160 |
| C  | -4.703609 | 0.981530  | -4.957489 |
| H  | -5.652258 | 1.055267  | -4.404217 |
| C  | 1.264069  | -1.851345 | -2.348143 |
| H  | 1.600787  | -0.798202 | -2.415915 |
| H  | 1.700080  | -2.311111 | -1.441060 |
| H  | 1.652982  | -2.389498 | -3.235937 |
| C  | 0.016921  | -0.055350 | -6.544398 |
| H  | 0.953553  | -0.198888 | -7.103495 |
| C  | -3.453385 | 1.291397  | -7.022760 |
| H  | -3.399767 | 1.620273  | -8.072674 |
| C  | -4.628852 | 1.438692  | -6.300641 |
| H  | -5.513592 | 1.890405  | -6.775044 |

Conformation 6.  
 Multiplicity: 4  
 Charge: 0  
 E(B97-3c) = -6436.929409885716 Hartree  
 E(M06/def2-TZVP) = -6437.181727031591 Hartree  
 E(PBE - D3(BJ)/def2-TZVP) = -6434.676341929215 Hartree  
 E(PBE0 - D3(BJ)/def2-TZVP) = -6435.134406632709 Hartree  
 E(PBEh-3c) = -6428.318436275017 Hartree  
 E(PM6) = -198.38159 Kcal/mol  
 E(PM7) = -371.42271 Kcal/mol  
 E(ωB97X-V/def2-TZVP) = -6440.922456065126 Hartree  
 E(GFN1-xTB) = -241.619865868035 Hartree  
 E(GFN2-xTB) = -236.789997096553 Hartree

E(GFN-FF) = -31.252154692759 Hartree

Coordinates:

Co 1.015841 -0.037062 -0.287927  
Si -1.962202 -0.040221 1.046870  
O -2.289842 -1.199636 -0.219832  
C -0.553523 1.046087 0.416418  
C -4.483474 -1.927808 -0.936063  
C -3.299149 -2.123139 -0.142914  
C -5.547339 -2.901105 -0.860588  
C -1.572195 -1.047009 2.597473  
H -2.447582 -1.679811 2.844471  
H -1.390835 -0.362907 3.448409  
H -0.695700 -1.710995 2.473215  
C -3.186033 -3.264643 0.650932  
H -2.269527 -3.425479 1.230958  
C -4.630894 -0.810815 -1.803607  
H -3.810866 -0.088059 -1.859356  
C -5.395018 -4.046349 -0.026836  
H -6.204841 -4.790266 0.014842  
C -5.777326 -0.642658 -2.566110  
H -5.868128 0.227391 -3.234029  
C -3.580516 0.860829 1.389814  
H -4.061623 1.248369 0.473028  
H -3.379581 1.703403 2.079696  
H -4.297554 0.167870 1.874963  
C -4.231021 -4.221552 0.703611  
H -4.104390 -5.113131 1.336188  
C -6.716346 -2.691899 -1.652055  
H -7.528044 -3.433294 -1.591607  
C -6.831665 -1.590844 -2.487928  
H -7.738780 -1.451980 -3.095482  
Si -1.087216 2.393025 -0.773172  
O -1.572779 3.732794 0.216316  
C -3.254328 5.427246 -0.081903  
C -1.885939 4.995529 -0.186044  
C -3.589324 6.781008 -0.453516  
C 0.353878 2.941977 -1.860270  
H 0.057355 3.780239 -2.521896  
H 0.680064 2.099822 -2.503722  
H 1.216549 3.261151 -1.247813  
C -0.907298 5.886957 -0.626294  
H 0.138192 5.553412 -0.677526  
C -4.281731 4.559248 0.384991  
H -4.009301 3.538769 0.682929  
C -2.561175 7.659238 -0.905799  
H -2.824759 8.690889 -1.184267  
C -5.594993 4.998507 0.473320  
H -6.378427 4.317242 0.838338  
C -2.565523 2.165726 -1.917839  
H -3.505832 1.971060 -1.371004  
H -2.417519 1.372917 -2.673426  
H -2.695068 3.129414 -2.454113  
C -1.250283 7.215896 -0.985069  
H -0.457248 7.899915 -1.323886  
C -4.950546 7.195753 -0.351595  
H -5.207066 8.227400 -0.638972  
C -5.933068 6.326366 0.098550  
H -6.977948 6.665805 0.168327  
Si 0.315291 1.816326 1.915877  
O -0.957191 2.069203 3.052839  
C -1.405873 3.934016 4.499475  
C -0.864541 2.618584 4.298221  
C -1.363930 4.509346 5.821165  
C 1.556875 0.617443 2.689168  
H 2.018674 1.086121 3.582850  
H 2.393372 0.378537 2.001690  
H 1.094294 -0.333713 3.006313  
C -0.314339 1.914262 5.367472  
H 0.079724 0.902347 5.197130  
C -1.982424 4.671892 3.427653  
H -2.001253 4.212332 2.430749  
C -0.787174 3.761958 6.890746  
H -0.759493 4.206092 7.897454  
C -2.503502 5.939765 3.643870  
H -2.948730 6.496435 2.804975  
C 1.233238 3.440053 1.690164  
H 0.596419 4.244109 1.281260  
H 2.123205 3.306445 1.044189  
H 1.594706 3.757063 2.690358  
C -0.276946 2.492833 6.663083  
H 0.160524 1.916550 7.492760  
C -1.908145 5.815401 6.004542  
H -1.880391 6.260643 7.011805  
C -2.465192 6.514863 4.942768  
H -2.879417 7.522117 5.106103  
Si 3.131435 -0.324418 -2.117740  
O 2.959939 0.768499 -0.718535  
C 1.639432 -1.366221 -1.778880  
C 4.815486 1.397228 0.720233  
C 3.887171 1.720007 -0.323766

C 5.743776 2.418587 1.146023  
C 3.111037 0.803780 -3.627562  
H 3.819653 1.638685 -3.450368  
C 3.458569 0.258176 -4.526461  
H 2.115050 1.236289 -3.844172  
C 3.909208 2.968392 -0.937239  
H 3.194904 3.182338 -1.742306  
C 4.860555 0.114696 1.337775  
H 4.158916 -0.660442 1.002580  
C 5.724773 3.695463 0.512098  
H 6.436543 4.464732 0.848213  
C 5.779042 -0.153904 2.342645  
H 5.804822 -1.154203 2.799759  
C 4.858400 -1.057710 -2.020349  
H 5.023377 -1.633241 -1.092562  
H 5.025596 -1.727502 -2.888809  
H 5.613841 -0.246540 -2.060868  
C 4.832244 3.959344 -0.514373  
H 4.827245 4.943067 -1.007268  
C 6.666241 2.107512 2.188676  
H 7.371443 2.887678 2.515602  
C 6.685618 0.850373 2.774004  
H 7.406481 0.626795 3.574978  
Si 1.860168 -2.904536 -0.726978  
O 2.728182 -2.253476 0.662094  
C 4.244606 -3.538394 2.059849  
C 2.963955 -2.922450 1.833720  
H 4.492155 -4.177378 3.332483  
C 2.942374 -4.278221 -1.428914  
H 3.271769 -4.956816 -0.615957  
C 2.356909 -4.870298 -2.159173  
H 3.844508 -3.886191 -1.937409  
C 1.992394 -2.970491 2.830748  
H 1.020538 -2.500409 2.637291  
C 5.278359 -3.539639 1.081048  
H 5.083405 -3.056648 0.117002  
C 3.471212 -4.193849 4.326455  
H 3.673443 -4.683183 5.291215  
C 6.504707 -4.136879 1.332435  
H 7.289572 -4.127333 0.561284  
C 0.271973 -3.606864 -0.015391  
H -0.422780 -2.788217 0.253442  
H -0.241875 -4.234960 -0.765671  
H 0.480054 -4.218592 0.884966  
C 2.243785 -3.603204 4.073221  
H 1.452175 -3.615434 4.837736  
C 5.765183 -4.781765 3.556670  
H 5.950250 -5.270044 4.526384  
C 6.751401 -4.764255 2.582408  
H 7.725800 -5.238224 2.776053  
Si 0.605197 -1.777045 -3.282399  
O 0.174744 -3.427543 -3.019939  
C -1.521281 -4.730036 -4.131476  
C -0.140646 -4.385812 -3.935846  
H -1.845373 -5.762677 -5.087253  
C 1.484760 -1.746011 -4.957140  
H 0.894817 -2.358811 -5.669794  
H 1.540940 -0.719175 -5.366436  
C 2.509246 -2.169533 -4.922092  
O 0.858120 -5.046759 -4.648669  
H 1.906453 -4.761942 -4.481047  
C -2.570487 -4.082919 -3.417328  
H -2.313904 -3.31906 -2.677226  
C -0.796312 -6.416024 -5.800041  
H -1.054078 -7.202116 -6.526163  
C -3.895868 -4.423066 -3.671666  
H -4.695281 -3.912289 -3.092881  
C -0.968862 -0.766659 -3.391159  
H -1.483853 -0.789799 -2.410012  
H -0.719624 0.286231 -3.635738  
H -1.658242 -1.149434 -4.170460  
C 0.526397 -6.063778 -5.579938  
H 1.334919 -6.569333 -6.130071  
C -3.218832 -6.089930 -5.289788  
H -3.469493 -6.876715 -6.018435  
C -4.220695 -5.433791 -4.590222  
H -5.275693 -5.696088 -4.762428

FUDNIB

Conformation 18.

Multiplicity: 5

Charge: 0

E(B97-3c) = -4543.371079649190 Hartree

E(M06/def2-TZVP) = -4543.374218507835 Hartree

E(PBE - D3(BJ)/def2-TZVP) = -4541.719550568001 Hartree

E(PBE0 - D3(BJ)/def2-TZVP) = -4542.045812467126 Hartree

E(PBEh-3c) = -4537.456637886689 Hartree

E(PM6) = 211.25911 Kcal/mol

E(PM7) = -4.53441 Kcal/mol

E(ωB97X-V/def2-TZVP) = -4545.914083603027 Hartree  
E(GFN1-xTB) = -154.671473112078 Hartree  
E(GFN2-xTB) = -153.632770400669 Hartree  
E(GFN-FF) = -21.588826957928 Hartree

Coordinates:

|    |           |           |           |
|----|-----------|-----------|-----------|
| Fe | 0.376637  | -0.072395 | 0.898803  |
| Si | 1.117302  | 3.188491  | 0.988490  |
| Si | -0.298077 | 1.479881  | 3.174612  |
| Si | -1.343653 | -1.020482 | -1.637776 |
| Si | 1.515941  | -2.163653 | -0.904737 |
| N  | 0.573749  | 1.668078  | 1.669572  |
| N  | 0.115505  | -1.131469 | -0.673439 |
| C  | -0.196318 | 3.844085  | -0.207103 |
| C  | -0.658339 | 5.177688  | -0.203694 |
| C  | -1.663762 | 5.596072  | -1.091080 |
| C  | -2.216096 | 4.689395  | -2.010937 |
| C  | -1.765089 | 3.359242  | -2.037548 |
| C  | -0.774702 | 2.948788  | -1.133657 |
| C  | 2.711717  | 2.858866  | 0.004651  |
| C  | 3.965969  | 2.821081  | 0.655634  |
| C  | 5.135072  | 2.453159  | -0.028983 |
| C  | 5.074324  | 2.116475  | -1.390966 |
| C  | 3.844384  | 2.176235  | -2.065680 |
| C  | 2.680631  | 2.552780  | -1.375133 |
| C  | 1.460531  | 4.469275  | 2.335968  |
| C  | -1.744061 | 2.688311  | 3.326833  |
| C  | -2.076229 | 3.312759  | 4.550462  |
| C  | -3.135156 | 4.231259  | 4.631769  |
| C  | -3.882518 | 4.544591  | 3.484865  |
| C  | -3.568647 | 3.935472  | 2.259241  |
| C  | -2.510096 | 3.018041  | 2.184504  |
| C  | -2.705035 | -0.142701 | -0.662276 |
| C  | 2.505795  | -1.876210 | 0.701584  |
| C  | 2.991122  | -0.575535 | 1.000022  |
| C  | 3.596891  | -0.297312 | 2.241713  |
| C  | 3.758851  | -1.318059 | 3.188090  |
| C  | 3.330463  | -2.625395 | 2.887811  |
| C  | 2.708358  | -2.896229 | 1.660341  |
| C  | 2.616330  | -1.681294 | -2.363718 |
| H  | -0.239350 | 5.904063  | 0.510795  |
| H  | -2.018944 | 6.638165  | -1.065003 |
| H  | -2.998721 | 5.020651  | -2.711026 |
| H  | -2.178098 | 2.636623  | -2.758431 |
| H  | -0.447543 | 1.897417  | -1.142957 |
| H  | 4.034226  | 3.077917  | 1.725798  |
| H  | 6.098653  | 2.423612  | 0.503083  |
| H  | 5.987396  | 1.817417  | -1.928128 |
| H  | 3.791154  | 1.932155  | -3.138512 |
| H  | 1.728073  | 2.613376  | -1.922895 |
| H  | 2.233156  | 4.108297  | 3.044478  |
| H  | 0.539289  | 4.682247  | 2.915942  |
| H  | 1.822956  | 5.420965  | 1.896729  |
| H  | -1.495476 | 3.084157  | 5.458675  |
| H  | -3.376095 | 4.709070  | 5.594153  |
| H  | -4.708938 | 5.269587  | 3.546204  |
| H  | -4.139746 | 4.183563  | 1.351469  |
| H  | -2.261175 | 2.568505  | 1.211643  |
| H  | -3.040552 | -0.756142 | 0.195998  |
| H  | -3.577148 | 0.055994  | -1.317951 |
| H  | -2.357138 | 0.830558  | -0.263064 |
| H  | 2.945941  | 0.227194  | 0.245637  |
| H  | 3.945828  | 0.723220  | 2.453960  |
| H  | 4.232293  | -1.101719 | 4.158205  |
| H  | 3.474820  | -3.433167 | 3.622063  |
| H  | 2.359332  | -3.917204 | 1.437367  |
| H  | 2.073736  | -1.744165 | -3.328294 |
| H  | 3.505517  | -2.342602 | -2.415020 |
| H  | 2.981417  | -0.641511 | -2.239727 |
| C  | 0.816903  | 1.563760  | 4.697556  |
| H  | 1.671972  | 0.870998  | 4.559915  |
| H  | 1.223705  | 2.585277  | 4.839334  |
| H  | 0.278960  | 1.268661  | 5.621575  |
| C  | 1.085238  | -4.003171 | -1.007358 |
| C  | -0.005499 | -4.514910 | -0.268949 |
| C  | 1.829728  | -4.904288 | -1.799500 |
| C  | -0.342198 | -5.874549 | -0.318794 |
| C  | 1.497349  | -6.267823 | -1.854427 |
| C  | 0.409712  | -6.755209 | -1.113649 |
| H  | -0.616119 | -3.825424 | 0.332194  |
| H  | 2.682334  | -4.539082 | -2.393981 |
| H  | -1.207584 | -6.246740 | 0.251072  |
| H  | 2.087748  | -6.952723 | -2.482937 |
| H  | 0.142491  | -7.822277 | -1.161496 |
| C  | -0.962785 | -0.302149 | 2.984174  |
| C  | -2.345440 | -0.591821 | 2.830454  |
| C  | -0.048991 | -1.400279 | 3.007316  |
| C  | -2.796856 | -1.906706 | 2.674718  |
| C  | -0.513082 | -2.724281 | 2.842928  |
| C  | -1.877645 | -2.976240 | 2.668190  |
| H  | -3.069647 | 0.238230  | 2.830640  |

|   |           |           |           |
|---|-----------|-----------|-----------|
| H | 1.013876  | -1.240867 | 3.254204  |
| H | -3.873379 | -2.107679 | 2.559671  |
| H | 0.207167  | -3.554804 | 2.861908  |
| H | -2.235303 | -4.009521 | 2.540775  |
| C | -1.983242 | -2.727617 | -2.156876 |
| C | -3.035242 | -3.372018 | -1.470051 |
| C | -1.351874 | -3.429864 | -3.208341 |
| C | -3.436345 | -4.673342 | -1.811996 |
| C | -1.737403 | -4.734603 | -3.546907 |
| C | -2.782137 | -5.359506 | -2.847083 |
| H | -3.548244 | -2.854163 | -0.643585 |
| H | -0.533625 | -2.948196 | -3.768839 |
| H | -4.260538 | -5.157245 | -1.264590 |
| H | -1.218128 | -5.269745 | -4.356595 |
| H | -3.085954 | -6.384755 | -3.109229 |
| C | -1.016960 | -0.038247 | -3.231240 |
| C | -2.024863 | 0.088617  | -4.214793 |
| C | 0.204162  | 0.633201  | -3.447379 |
| C | -1.824485 | 0.872086  | -5.362165 |
| C | 0.413493  | 1.418274  | -4.592178 |
| C | -0.603735 | 1.542549  | -5.551002 |
| H | -2.984673 | -0.481544 | -4.084049 |
| H | 0.997287  | 0.547493  | -2.690346 |
| H | -2.623072 | 0.960340  | -6.115333 |
| H | 1.372615  | 1.941216  | -4.734106 |
| H | -0.446353 | 2.160762  | -6.448276 |

Conformation 2.

Multiplicity: 5

Charge: 0

E(B97-3c) = -4543.368423474888 Hartree

E(M06/def2-TZVP) = -4543.373174660177 Hartree

E(PBE - D3(BJ)/def2-TZVP) = -4541.717326316109 Hartree

E(PBE0 - D3(BJ)/def2-TZVP) = -4542.044023654015 Hartree

E(PBEh-3c) = -4537.456736584071 Hartree

E(PM6) = 209.06869 Kcal/mol

E(PM7) = -3.64883 Kcal/mol

E(ωB97X-V/def2-TZVP) = -4545.917892854042 Hartree

E(GFN1-xTB) = -154.668709757897 Hartree

E(GFN2-xTB) = -153.625767829555 Hartree

E(GFN-FF) = -21.594184897013 Hartree

Coordinates:

|    |           |           |           |
|----|-----------|-----------|-----------|
| Fe | 0.631272  | -0.563765 | 0.017905  |
| Si | -0.288124 | 2.626766  | -0.557936 |
| Si | 2.567212  | 1.390641  | -0.489757 |
| Si | -0.475642 | -3.566304 | -0.324298 |
| Si | -1.317444 | -1.743247 | 2.021299  |
| N  | 0.819029  | 1.267384  | -0.445150 |
| N  | -0.409671 | -2.055397 | 0.557942  |
| C  | -1.604740 | 2.237051  | -1.867608 |
| C  | -1.290077 | 1.377998  | -2.943028 |
| C  | -2.218113 | 1.105699  | -3.960655 |
| C  | -3.487310 | 1.704646  | -3.925406 |
| C  | -3.816078 | 2.575946  | -2.873871 |
| C  | -2.883459 | 2.836859  | -1.856897 |
| C  | 0.654015  | 4.157994  | -1.181600 |
| C  | 0.701777  | 4.457033  | -2.563292 |
| C  | 1.448725  | 5.541495  | -3.048837 |
| C  | 2.161560  | 6.358704  | -2.156265 |
| C  | 2.117816  | 6.087381  | -0.779649 |
| C  | 1.369521  | 5.006634  | -0.300249 |
| C  | -1.114763 | 3.014807  | 1.091273  |
| C  | 3.247208  | 2.544893  | 0.840331  |
| C  | 2.607209  | 2.604132  | 2.099023  |
| C  | 3.065285  | 3.472301  | 3.102185  |
| C  | 4.179403  | 4.294673  | 2.865264  |
| C  | 4.832691  | 4.242174  | 1.623048  |
| C  | 4.367498  | 3.375106  | 0.621726  |
| C  | 0.585058  | -4.912764 | 0.473077  |
| C  | -0.262869 | -0.579420 | 3.095790  |
| C  | -0.800871 | 0.552894  | 3.747971  |
| C  | -0.032137 | 1.301609  | 4.653490  |
| C  | 1.293120  | 0.925932  | 4.929274  |
| C  | 1.852959  | -0.185006 | 4.278368  |
| C  | 1.081883  | -0.926486 | 3.369676  |
| C  | -1.630888 | -3.312737 | 3.031163  |
| H  | -0.288449 | 0.921494  | -2.972304 |
| H  | -1.953821 | 0.423312  | -4.783719 |
| H  | -4.219914 | 1.495776  | -4.720106 |
| H  | -4.808577 | 3.052086  | -2.844570 |
| H  | -3.163001 | 3.516958  | -1.036411 |
| H  | 0.140794  | 3.829041  | -3.274182 |
| H  | 1.471181  | 5.753256  | -4.129147 |
| H  | 2.747072  | 7.211197  | -2.534505 |
| H  | 2.674637  | 6.721288  | -0.072447 |
| H  | 1.362114  | 4.798857  | 0.782043  |
| H  | -0.357717 | 3.260196  | 1.862298  |
| H  | -1.694620 | 2.140984  | 1.447672  |
| H  | -1.802831 | 3.879720  | 0.999359  |
| H  | 1.731409  | 1.965915  | 2.296132  |

|   |           |           |           |   |           |           |           |
|---|-----------|-----------|-----------|---|-----------|-----------|-----------|
| H | 2.548233  | 3.505569  | 4.073421  | C | 5.888413  | 1.486701  | -0.329585 |
| H | 4.540892  | 4.976614  | 3.650891  | C | 4.651430  | 0.842693  | -0.179003 |
| H | 5.706550  | 4.884688  | 1.432484  | C | 1.699327  | -1.447589 | -2.533152 |
| H | 4.879746  | 3.359158  | -0.353131 | C | 1.584508  | -0.827247 | -3.800146 |
| H | 1.617091  | -4.538652 | 0.617061  | C | 1.152994  | -1.542693 | -4.927568 |
| H | 0.628246  | -5.837768 | -0.137845 | C | 0.808216  | -2.899695 | -4.809016 |
| H | 0.175941  | -5.181295 | 1.467522  | C | 0.902754  | -3.531748 | -3.559531 |
| H | -1.845039 | 0.845253  | 3.551772  | C | 1.349338  | -2.814307 | -2.437274 |
| H | -0.471506 | 2.179137  | 5.153085  | C | 2.366076  | -1.651340 | 0.459355  |
| H | 1.893170  | 1.501850  | 5.650486  | C | 0.933128  | 2.939238  | -2.739238 |
| H | 2.895468  | -0.475040 | 4.482285  | C | 0.080723  | 2.171088  | -3.563176 |
| H | 1.529797  | -1.801524 | 2.870801  | C | -0.069137 | 2.457671  | -4.927826 |
| H | -2.251236 | -4.034330 | 2.462275  | C | 0.646931  | 3.520607  | -5.502537 |
| H | -2.154197 | -3.070851 | 3.978258  | C | 1.507612  | 4.291059  | -4.703939 |
| H | -0.669281 | -3.796296 | 3.295980  | C | 1.645532  | 4.003780  | -3.335972 |
| C | 3.262294  | 1.803553  | -2.191758 | C | -4.200354 | -2.112060 | 1.388829  |
| H | 2.817367  | 1.130678  | -2.953180 | C | -1.446355 | -1.595470 | 4.300251  |
| H | 3.016651  | 2.846661  | -2.474382 | C | -0.137192 | -2.067475 | 4.553789  |
| H | 4.363142  | 1.672319  | -2.219920 | C | 0.085041  | -3.251387 | 5.273570  |
| C | -2.978319 | -0.894467 | 1.684199  | C | -1.004369 | -3.989872 | 5.764132  |
| C | -3.193059 | -0.120212 | 0.522748  | C | -2.311696 | -3.530177 | 5.541606  |
| C | -4.049563 | -1.022947 | 2.597343  | C | -2.525847 | -2.343828 | 4.821135  |
| C | -4.431139 | 0.492728  | 0.274094  | C | -3.368749 | 0.749959  | 3.678487  |
| C | -5.289294 | -0.409823 | 2.359186  | H | 4.030083  | 0.060357  | -3.450929 |
| C | -5.482900 | 0.346839  | 1.192987  | H | 6.209770  | 1.220164  | -3.730550 |
| H | -2.381583 | -0.001766 | -0.214814 | H | 7.418898  | 2.139834  | -1.733538 |
| H | -3.920986 | -1.620333 | 3.513983  | H | 6.416870  | 1.878439  | 0.553633  |
| H | -4.569708 | 1.082290  | -0.643844 | H | 4.223757  | 0.745368  | 0.832465  |
| H | -6.109328 | -0.530363 | 3.084121  | H | 1.817120  | 0.242680  | -3.910763 |
| H | -6.456460 | 0.823207  | 0.999213  | H | 1.075850  | -1.033819 | -5.901576 |
| C | 3.094266  | -0.395688 | -0.027465 | H | 0.463661  | -3.046270 | -5.690304 |
| C | 3.707451  | -0.711098 | 1.214766  | H | 0.620697  | -4.590009 | -3.449615 |
| C | 2.948069  | -1.445351 | -0.980285 | H | 1.398901  | -3.333929 | -1.467320 |
| C | 4.137831  | -2.011606 | 1.502278  | H | 1.372787  | -2.070982 | 0.716958  |
| C | 3.388321  | -2.752893 | -0.690645 | H | 2.765237  | -1.132184 | 1.353814  |
| C | 3.976468  | -3.035791 | 0.548390  | H | 3.045458  | -2.497997 | 0.234014  |
| H | 3.844618  | 0.086746  | 1.960472  | H | -0.459280 | 1.313217  | -3.134309 |
| H | 2.552332  | -1.233829 | -1.986344 | H | -0.741472 | 1.840885  | -5.545461 |
| H | 4.609653  | -2.232499 | 2.472434  | H | 0.538495  | 3.747653  | -6.574481 |
| H | 3.272924  | -3.541921 | -1.447579 | H | 2.077234  | 5.120500  | -5.151212 |
| H | 4.325560  | -4.056033 | 0.770915  | H | 2.326045  | 4.619704  | -2.726810 |
| C | 0.173348  | -3.202957 | -2.073705 | H | -4.020989 | -2.574231 | 2.380237  |
| C | -0.056025 | -1.941279 | -2.668520 | H | -4.743590 | -2.848531 | 0.762753  |
| C | 0.920171  | -4.147670 | -2.811320 | H | -4.849076 | -1.223963 | 1.528411  |
| C | 0.464556  | -1.622624 | -3.933950 | H | 0.728652  | -1.498098 | 4.178937  |
| C | 1.444157  | -3.838608 | -4.076924 | H | 1.114057  | -3.599050 | 5.455236  |
| C | 1.224272  | -2.569742 | -4.638115 | H | -0.833642 | -4.920948 | 6.326404  |
| H | -0.656149 | -1.185318 | -2.130212 | H | -3.170035 | -4.098922 | 5.932067  |
| H | 1.113769  | -5.144663 | -2.383865 | H | -3.560077 | -1.996802 | 4.663245  |
| H | 0.279177  | -0.630652 | -4.373481 | H | -3.514766 | 1.651355  | 3.050628  |
| H | 2.030068  | -4.590086 | -4.628970 | H | -3.396101 | 1.046519  | 4.746979  |
| H | 1.638475  | -2.321116 | -5.627118 | H | -4.222156 | 0.067549  | 3.494701  |
| C | -2.261307 | -4.192332 | -0.448544 | C | 2.460037  | 3.516769  | -0.129679 |
| C | -2.631203 | -5.497825 | -0.054537 | H | 2.568392  | 3.281388  | 0.946159  |
| C | -3.277696 | -3.330304 | -0.919665 | H | 3.421882  | 3.291434  | -0.630211 |
| C | -3.966222 | -5.928002 | -0.124972 | H | 2.255138  | 4.602780  | -0.228745 |
| C | -4.613943 | -3.750119 | -0.984656 | C | -0.305928 | 1.144858  | 3.520059  |
| C | -4.960723 | -5.052180 | -0.588200 | C | -0.437205 | 2.258594  | 4.378424  |
| H | -1.865570 | -6.195129 | 0.321917  | C | 0.950461  | 0.933827  | 2.904402  |
| H | -3.024236 | -2.304774 | -1.229930 | C | 0.637869  | 3.130334  | 4.610679  |
| H | -4.232041 | -6.949784 | 0.188734  | C | 2.031909  | 1.800660  | 3.133733  |
| H | -5.389889 | -3.052799 | -1.337233 | C | 1.877466  | 2.902375  | 3.988772  |
| H | -6.008972 | -5.384977 | -0.638550 | H | -1.402298 | 2.456510  | 4.871063  |

Conformation 21.

Multiplicity: 5

Charge: 0

E(B97-3c) = -4543.367091138188 Hartree

E(M06/def2-TZVP) = -4543.371282237613 Hartree

E(PBE - D3(BJ)/def2-TZVP) = -4541.717394545529 Hartree

E(PBE0 - D3(BJ)/def2-TZVP) = -4542.042593890112 Hartree

E(PBEh-3c) = -4537.452805720653 Hartree

E(PM6) = 217.16784 Kcal/mol

E(PM7) = -3.22646 Kcal/mol

E( $\omega$ B97X-V/def2-TZVP) = -4545.913271856990 Hartree

E(GFN1-xTB) = -154.672058260097 Hartree

E(GFN2-xTB) = -153.626863228533 Hartree

E(GFN-FF) = -21.456172761762 Hartree

Coordinates:

|    |           |           |           |   |           |           |           |
|----|-----------|-----------|-----------|---|-----------|-----------|-----------|
| Fe | -0.549608 | 0.606329  | 0.378808  | C | -0.594171 | -3.642996 | 1.324090  |
| Si | 2.234839  | -0.462468 | -1.002214 | C | -1.737662 | -4.112828 | -0.757062 |
| Si | 1.061394  | 2.516232  | -0.898110 | C | 0.137688  | -4.834043 | 1.197152  |
| Si | -2.545359 | -1.663011 | 0.591133  | C | -1.009546 | -5.305936 | -0.890033 |
| Si | -1.732991 | -0.067501 | 3.204537  | H | -0.665240 | -5.667529 | 0.085371  |
| N  | 1.062057  | 0.786006  | -0.626295 | H | -0.431214 | -3.002997 | 2.204190  |
| N  | -1.645314 | -0.478986 | 1.510025  | H | -2.466298 | -3.841473 | -1.538056 |
| C  | 3.942445  | 0.327563  | -1.290134 | H | 0.869291  | -5.111011 | 1.972389  |
| C  | 4.536362  | 0.470396  | -2.564019 | H | -1.179784 | -5.957165 | -1.761913 |
| C  | 5.771816  | 1.119070  | -2.725282 | H | 0.507340  | -6.602377 | -0.019209 |
| C  | 6.449796  | 1.632316  | -1.608913 | C | -2.862120 | -0.918637 | -1.132236 |
|    |           |           |           | C | -1.930886 | -1.077062 | -2.185871 |

|   |           |           |           |   |           |           |           |
|---|-----------|-----------|-----------|---|-----------|-----------|-----------|
| C | -4.036486 | -0.175815 | -1.398606 | H | 3.208954  | 3.048837  | 2.008112  |
| C | -2.166179 | -0.520838 | -3.455184 | H | 4.212877  | 1.627799  | 2.462404  |
| C | -4.268546 | 0.397996  | -2.657642 | C | 0.549000  | -1.275897 | -4.004023 |
| C | -3.331781 | 0.223765  | -3.691512 | C | 1.577735  | -0.884494 | -4.892528 |
| H | -1.010431 | -1.659181 | -2.029483 | C | -0.785774 | -1.104063 | -4.433789 |
| H | -4.788214 | -0.041303 | -0.604080 | C | 1.287046  | -0.329917 | -6.149856 |
| H | -1.428616 | -0.681483 | -4.255650 | C | -1.085287 | -0.543095 | -5.684498 |
| H | -5.188887 | 0.974893  | -2.839163 | C | -0.048060 | -0.150218 | -6.545123 |
| H | -3.515716 | 0.662360  | -4.684577 | H | 2.632164  | -1.003303 | -4.596500 |

Conformation 23.

Multiplicity: 5

Charge: 0

E(B97-3c) = -4543.367256545556 Hartree  
 E(M06/def2-TZVP) = -4543.369366511494 Hartree  
 E(PBE - D3(BJ)/def2-TZVP) = -4541.715928459251 Hartree  
 E(PBE0 - D3(BJ)/def2-TZVP) = -4542.041236006112 Hartree  
 E(PBEh-3c) = -4537.453376490443 Hartree  
 E(PM6) = 224.33014 Kcal/mol  
 E(PM7) = -5.19854 Kcal/mol  
 E( $\omega$ B97X-V/def2-TZVP) = -4545.914275737952 Hartree  
 E(GFN1-xTB) = -154.668888547662 Hartree  
 E(GFN2-xTB) = -153.627301352972 Hartree  
 E(GFN-FF) = -21.586369281711 Hartree

Coordinates:

|    |           |           |           |
|----|-----------|-----------|-----------|
| Fe | 0.293224  | -0.557382 | 0.489965  |
| Si | -0.318058 | 2.729944  | 0.731852  |
| Si | 1.780039  | 1.025225  | 2.289629  |
| Si | -1.872455 | -1.998980 | -0.863010 |
| Si | 0.961984  | -1.995329 | -2.294669 |
| N  | 0.435890  | 1.209398  | 1.179754  |
| N  | -0.190058 | -1.555752 | -1.055108 |
| C  | -0.056274 | 3.061257  | -1.117022 |
| C  | 0.653506  | 2.161943  | -1.939623 |
| C  | 0.783972  | 2.376736  | -3.320990 |
| C  | 0.213747  | 3.518696  | -3.904201 |
| C  | -0.479728 | 4.441013  | -3.101816 |
| C  | -0.614006 | 4.210426  | -1.723668 |
| C  | 0.487958  | 4.153474  | 1.698071  |
| C  | 1.484314  | 4.963825  | 1.106250  |
| C  | 2.140991  | 5.963049  | 1.842084  |
| C  | 1.810454  | 6.173110  | 3.190980  |
| C  | 0.815074  | 5.388071  | 3.794548  |
| C  | 0.159662  | 4.393795  | 3.052190  |
| C  | -2.173903 | 2.718836  | 1.088950  |
| C  | 1.242461  | 1.408441  | 4.062429  |
| C  | -0.085119 | 1.121742  | 4.451606  |
| C  | -0.541386 | 1.412067  | 5.745658  |
| C  | 0.326904  | 2.005722  | 6.677151  |
| C  | 1.650081  | 2.298124  | 6.308429  |
| C  | 2.102091  | 1.997789  | 5.013433  |
| C  | -2.351934 | -3.640660 | -1.660069 |
| C  | 1.006242  | -3.887921 | -2.434027 |
| C  | 0.993390  | -4.565607 | -3.671414 |
| C  | 1.011498  | -5.969677 | -3.727500 |
| C  | 1.045269  | -6.720751 | -2.542208 |
| C  | 1.061539  | -6.062827 | -1.300196 |
| C  | 1.039337  | -4.661224 | -1.250683 |
| C  | 2.685122  | -1.394733 | -1.798232 |
| H  | 1.082488  | 1.253502  | -1.486744 |
| H  | 1.311728  | 1.640470  | -3.945202 |
| H  | 0.307233  | 3.687431  | -4.988117 |
| H  | -0.924351 | 5.341002  | -3.554884 |
| H  | -1.166439 | 4.940860  | -1.109231 |
| H  | 1.754040  | 4.804079  | 0.049628  |
| H  | 2.915557  | 6.580993  | 1.361450  |
| H  | 2.327652  | 6.952590  | 3.771846  |
| H  | 0.551315  | 5.544237  | 4.851933  |
| H  | -0.608503 | 3.781276  | 3.549522  |
| H  | -2.375801 | 2.438198  | 2.142542  |
| H  | -2.693674 | 2.004272  | 0.419911  |
| H  | -2.608500 | 3.723303  | 0.910490  |
| H  | -0.777321 | 0.685352  | 3.714923  |
| H  | -1.580718 | 1.181731  | 6.029333  |
| H  | -0.028894 | 2.242816  | 7.691773  |
| H  | 2.332184  | 2.768480  | 7.033692  |
| H  | 3.139523  | 2.246439  | 4.738181  |
| H  | -2.136556 | -3.622941 | -2.747399 |
| H  | -3.436762 | -3.828393 | -1.525814 |
| H  | -1.784113 | -4.489727 | -1.231222 |
| H  | 0.958173  | -3.984907 | -4.607826 |
| H  | 0.994053  | -6.481349 | -4.702538 |
| H  | 1.055994  | -7.820937 | -2.585274 |
| H  | 1.086237  | -6.647723 | -0.366831 |
| H  | 1.033950  | -4.151448 | -0.273317 |
| H  | 2.735922  | -0.291283 | -1.691754 |
| H  | 3.437488  | -1.700635 | -2.553452 |
| H  | 2.980393  | -1.855017 | -0.835411 |
| C  | 3.352879  | 1.962516  | 1.846526  |
| H  | 3.606364  | 1.806912  | 0.778417  |

Conformation 24.

Multiplicity: 5

Charge: 0

E(B97-3c) = -4543.361856864503 Hartree  
 E(M06/def2-TZVP) = -4543.365468626444 Hartree  
 E(PBE - D3(BJ)/def2-TZVP) = -4541.711997926952 Hartree  
 E(PBE0 - D3(BJ)/def2-TZVP) = -4542.037069662785 Hartree  
 E(PBEh-3c) = -4537.447833398744 Hartree  
 E(PM6) = 215.50676 Kcal/mol  
 E(PM7) = -3.31226 Kcal/mol  
 E( $\omega$ B97X-V/def2-TZVP) = -4545.912577660856 Hartree  
 E(GFN1-xTB) = -154.666139085289 Hartree  
 E(GFN2-xTB) = -153.625652613226 Hartree  
 E(GFN-FF) = -21.584218918269 Hartree

Coordinates:

|    |           |           |           |
|----|-----------|-----------|-----------|
| Fe | 0.495859  | 0.118908  | -0.539992 |
| Si | -0.565781 | -2.863932 | 0.145283  |
| Si | -0.688596 | -1.340070 | -2.658982 |
| Si | -0.569655 | 2.186997  | 1.501566  |
| Si | 2.516335  | 1.760730  | 1.173960  |
| N  | -0.166181 | -1.601696 | -1.005788 |
| N  | 0.837062  | 1.490376  | 0.734852  |
| C  | 0.120421  | -4.534007 | -0.437425 |
| C  | 1.193269  | -4.594910 | -1.353168 |
| C  | 1.756202  | -5.821847 | -1.739111 |
| C  | 1.251591  | -7.020327 | -1.209540 |
| C  | 0.185294  | -6.982930 | -0.296082 |
| C  | -0.372345 | -5.751905 | 0.083995  |
| C  | -2.446936 | -3.013032 | 0.345691  |
| C  | -3.132861 | -2.213639 | 1.288390  |
| C  | -4.532945 | -2.248019 | 1.389214  |
| C  | -5.275846 | -3.091716 | 0.548305  |
| C  | -4.613425 | -3.897881 | -0.391217 |
| C  | -3.214867 | -3.856400 | -0.488915 |
| C  | 0.184058  | -2.452999 | 1.824000  |
| C  | -2.553661 | -1.507794 | -2.911442 |
| C  | -3.455857 | -0.851054 | -2.043135 |
| C  | -4.842050 | -0.971492 | -2.208520 |
| C  | -5.358326 | -1.765233 | -3.245678 |
| C  | -4.481446 | -2.433975 | -4.112991 |
| C  | -3.092830 | -2.302712 | -3.946923 |
| C  | -2.118251 | 1.623118  | 0.569847  |
| C  | 3.262128  | 0.014555  | 1.216863  |



|   |           |           |           |                                                            |           |           |           |
|---|-----------|-----------|-----------|------------------------------------------------------------|-----------|-----------|-----------|
| C | 3.199017  | -0.775195 | 0.043297  | E(PBEh-3c) = -4537.450265528681 Hartree                    |           |           |           |
| C | 3.584986  | -2.124501 | 0.040247  | E(PM6) = 208.04060 Kcal/mol                                |           |           |           |
| C | 4.046836  | -2.717193 | 1.225829  | E(PM7) = -5.85628 Kcal/mol                                 |           |           |           |
| C | 4.125190  | -1.952510 | 2.401309  | E( $\omega$ B97X-V/def2-TZVP) = -4545.910341974219 Hartree |           |           |           |
| C | 3.736935  | -0.601490 | 2.393990  | E(GFN1-xTB) = -154.670020074520 Hartree                    |           |           |           |
| C | 2.764909  | 2.659450  | 2.814887  | E(GFN2-xTB) = -153.625932708899 Hartree                    |           |           |           |
| H | 1.586645  | -3.656066 | -1.771781 | E(GFN-FF) = -21.596416885984 Hartree                       |           |           |           |
| H | 2.590130  | -5.844252 | -2.458336 |                                                            |           |           |           |
| H | 1.687947  | -7.985417 | -1.510403 | Coordinates:                                               |           |           |           |
| H | -0.215801 | -7.920211 | 0.120349  | Fe                                                         | 0.022662  | -0.139476 | 0.109807  |
| H | -1.213160 | -5.739518 | 0.797101  | Si                                                         | -0.586809 | 0.511578  | -2.929910 |
| H | -2.567517 | -1.548648 | 1.962172  | Si                                                         | -2.231860 | 1.813413  | -0.642683 |
| H | -5.045387 | -1.615845 | 2.131235  | Si                                                         | 1.562970  | -2.244027 | 1.165721  |
| H | -6.374014 | -3.119691 | 0.623603  | Si                                                         | 3.044395  | 0.557279  | 1.280897  |
| H | -5.191091 | -4.554521 | -1.059689 | N                                                          | -1.028284 | 0.684748  | -1.243694 |
| H | -2.710061 | -4.488839 | -1.236658 | N                                                          | 1.686610  | -0.501638 | 0.997152  |
| H | -0.214452 | -1.501980 | 2.228586  | C                                                          | -2.091798 | 0.013894  | -3.966663 |
| H | 1.285954  | -2.365634 | 1.756215  | C                                                          | -2.331694 | 0.561023  | -5.246267 |
| H | -0.056093 | -3.257353 | 2.548819  | C                                                          | -3.454546 | 0.181788  | -5.999677 |
| H | -3.069552 | -0.250389 | -1.207330 | C                                                          | -4.360076 | -0.758174 | -5.483515 |
| H | -5.522224 | -0.458267 | -1.512194 | C                                                          | -4.137040 | -1.316180 | -4.214336 |
| H | -6.447071 | -1.868564 | -3.372909 | C                                                          | -3.014901 | -0.931778 | -3.466404 |
| H | -4.880250 | -3.062445 | -4.924481 | C                                                          | 0.724349  | -0.856042 | -3.116930 |
| H | -2.420963 | -2.836196 | -4.637722 | C                                                          | 2.089415  | -0.566609 | -2.887936 |
| H | -2.146320 | 2.009987  | -0.468119 | C                                                          | 3.090803  | -1.515801 | -3.144148 |
| H | -3.030893 | 1.972990  | 1.094206  | C                                                          | 2.743225  | -2.787561 | -3.628708 |
| H | -2.162040 | 0.514123  | 0.533642  | C                                                          | 1.392169  | -3.101769 | -3.848728 |
| H | 2.866184  | -0.315290 | -0.907409 | C                                                          | 0.396788  | -2.142767 | -3.600462 |
| H | 3.517719  | -2.717585 | -0.883195 | C                                                          | 0.164846  | 2.099172  | -3.637031 |
| H | 4.338255  | -3.778335 | 1.232817  | C                                                          | -3.971208 | 1.459699  | -1.307245 |
| H | 4.485313  | -2.414866 | 3.333415  | C                                                          | -4.553556 | 2.291969  | -2.288895 |
| H | 3.797332  | -0.019940 | 3.328115  | C                                                          | -5.804705 | 1.992649  | -2.850856 |
| H | 2.355313  | 3.686757  | 2.739240  | C                                                          | -6.513327 | 0.858928  | -2.425270 |
| H | 3.850323  | 2.745538  | 3.027135  | C                                                          | -5.958169 | 0.021429  | -1.444801 |
| H | 2.268254  | 2.156837  | 3.666922  | C                                                          | -4.697603 | 0.315298  | -0.905005 |
| C | 0.222065  | -2.384084 | -3.943040 | C                                                          | 2.696523  | -3.250080 | 0.049750  |
| H | 1.318965  | -2.256460 | -3.844125 | C                                                          | 2.788202  | 2.218174  | 0.384821  |
| H | -0.003875 | -3.462169 | -3.819018 | C                                                          | 3.241883  | 2.418144  | -0.938480 |
| H | -0.062929 | -2.076754 | -4.970131 | C                                                          | 3.012754  | 3.625275  | -1.618149 |
| C | 3.415530  | 2.774539  | -0.152676 | C                                                          | 2.320830  | 4.667833  | -0.981127 |
| C | 4.571826  | 2.317002  | -0.821475 | C                                                          | 1.889476  | 4.505973  | 0.345147  |
| C | 2.921445  | 4.058126  | -0.481368 | C                                                          | 2.133082  | 3.298555  | 1.019711  |
| C | 5.202463  | 3.103354  | -1.801300 | C                                                          | 4.663885  | -0.195937 | 0.644722  |
| C | 3.552209  | 4.851626  | -1.450864 | H                                                          | -1.632508 | 1.302906  | -5.664715 |
| C | 4.691541  | 4.372062  | -2.119978 | H                                                          | -3.626335 | 0.625166  | -6.993119 |
| H | 4.986013  | 1.325529  | -0.577605 | H                                                          | -5.245003 | -1.052027 | -6.069100 |
| H | 2.016191  | 4.440438  | 0.016744  | H                                                          | -4.852079 | -2.042505 | -3.797840 |
| H | 6.099158  | 2.725277  | -2.316864 | H                                                          | -2.859537 | -1.355742 | -2.462176 |
| H | 3.149664  | 5.848859  | -1.689311 | H                                                          | 2.376004  | 0.428140  | -2.514693 |
| H | 5.184552  | 4.989832  | -2.886525 | H                                                          | 4.148391  | -1.263646 | -2.967403 |
| C | -0.168677 | 0.492544  | -2.865575 | H                                                          | 3.525781  | -3.534182 | -3.833349 |
| C | -1.096780 | 1.557259  | -3.026658 | H                                                          | 1.113794  | -4.096303 | -4.231113 |
| C | 1.223997  | 0.822354  | -2.871235 | H                                                          | -0.656813 | -2.391525 | -3.804346 |
| C | -0.663895 | 2.882689  | -3.150371 | H                                                          | 0.898058  | 2.523105  | -2.921799 |
| C | 1.654476  | 2.161838  | -2.990827 | H                                                          | -0.615807 | 2.866296  | -3.813111 |
| C | 0.711974  | 3.187683  | -3.115975 | H                                                          | 0.684290  | 1.905650  | -4.597746 |
| H | -2.173327 | 1.327761  | -3.061262 | H                                                          | -4.015752 | 3.188476  | -2.635319 |
| H | 1.979937  | 0.019502  | -2.904171 | H                                                          | -6.228533 | 2.647150  | -3.628073 |
| H | -1.402654 | 3.689050  | -3.279632 | H                                                          | -7.495723 | 0.623897  | -2.863145 |
| H | 2.728545  | 2.396902  | -2.992570 | H                                                          | -6.504773 | -0.874817 | -1.110594 |
| H | 1.052615  | 4.230434  | -3.198522 | H                                                          | -4.255402 | -0.376204 | -0.173817 |
| C | -0.486442 | 4.082728  | 1.460940  | H                                                          | 2.583105  | -2.954763 | -1.010173 |
| C | -0.612728 | 4.743087  | 0.216147  | H                                                          | 2.469862  | -4.331523 | 0.148734  |
| C | -0.221069 | 4.869674  | 2.603206  | H                                                          | 3.758769  | -3.105241 | 0.328711  |
| C | -0.475575 | 6.135709  | 0.114025  | H                                                          | 3.801168  | 1.618764  | -1.449794 |
| C | -0.079231 | 6.264227  | 2.507069  | H                                                          | 3.736705  | 3.756117  | -2.649238 |
| C | -0.205113 | 6.899778  | 1.261783  | H                                                          | 2.130068  | 5.611831  | -1.513968 |
| H | -0.800545 | 4.153053  | -0.695321 | H                                                          | 1.366580  | 5.326837  | 0.859958  |
| H | -0.118548 | 4.382398  | 3.586361  | H                                                          | 1.819871  | 3.199045  | 2.071479  |
| H | -0.576302 | 6.628842  | -0.865710 | H                                                          | 4.933133  | -1.098203 | 1.230083  |
| H | 0.132475  | 6.858447  | 3.409623  | H                                                          | 5.499634  | 0.527058  | 0.736207  |
| H | -0.093072 | 7.992357  | 1.184995  | H                                                          | 4.570786  | -0.497760 | -0.418450 |
| C | -0.757065 | 1.593443  | 3.294500  | C                                                          | -1.762575 | 3.612062  | -0.995113 |
| C | 0.079863  | 0.587282  | 3.824475  | H                                                          | -0.727713 | 3.792748  | -0.638637 |
| C | -1.786396 | 2.099104  | 4.121666  | H                                                          | -1.787482 | 3.855289  | -2.075913 |
| C | -0.099710 | 0.100820  | 5.129483  | H                                                          | -2.445089 | 4.307878  | -0.465219 |
| C | -1.970084 | 1.620679  | 5.428609  | C                                                          | 3.252028  | 0.973170  | 3.122153  |
| C | -1.125810 | 0.618541  | 5.935044  | C                                                          | 2.487478  | 0.352351  | 4.133371  |
| H | 0.885643  | 0.173354  | 3.198395  | C                                                          | 4.219643  | 1.926630  | 3.516322  |
| H | -2.458579 | 2.886768  | 3.741279  | C                                                          | 2.684894  | 0.663083  | 5.489037  |
| H | 0.563091  | -0.688836 | 5.516368  | C                                                          | 4.240196  | 2.244427  | 4.868161  |
| H | -2.776620 | 2.030646  | 6.056402  | C                                                          | 3.652305  | 1.609941  | 5.859161  |
| H | -1.269926 | 0.240653  | 6.959037  | H                                                          | 1.727488  | -0.392071 | 3.855693  |
|   |           |           |           | H                                                          | 4.824953  | 2.440564  | 2.750641  |
|   |           |           |           | H                                                          | 2.082066  | 0.155215  | 6.257923  |
|   |           |           |           | H                                                          | 5.178532  | 2.990925  | 5.151702  |
|   |           |           |           | H                                                          | 3.810107  | 1.855546  | 6.920825  |
|   |           |           |           | C                                                          | -2.143410 | 1.566412  | 1.243184  |
|   |           |           |           | C                                                          | -3.204431 | 1.149453  | 2.075805  |
|   |           |           |           | C                                                          | -0.874816 | 1.789911  | 1.845694  |
|   |           |           |           | C                                                          | -2.996469 | 0.890949  | 3.440430  |

Conformation 26.  
 Multiplicity: 5  
 Charge: 0  
 E(B97-3c) = -4543.364960019486 Hartree  
 E(M06/def2-TZVP) = -4543.368737449843 Hartree  
 E(PBE - D3(BJ)/def2-TZVP) = -4541.714985452026 Hartree  
 E(PBE0 - D3(BJ)/def2-TZVP) = -4542.040417035433 Hartree

|   |           |           |           |   |           |           |           |
|---|-----------|-----------|-----------|---|-----------|-----------|-----------|
| C | -0.661938 | 1.520679  | 3.213935  | H | -3.536444 | -2.658942 | -0.615362 |
| C | -1.721320 | 1.061459  | 4.009147  | H | -5.019919 | -1.646842 | -0.796539 |
| H | -4.211402 | 1.020592  | 1.649753  | H | -2.023209 | -3.328534 | 1.551695  |
| H | -0.045955 | 2.181560  | 1.247052  | H | -3.461465 | -5.122794 | 2.524797  |
| H | -3.837261 | 0.556876  | 4.068288  | H | -4.658491 | -4.733039 | 4.695393  |
| H | 0.332435  | 1.683914  | 3.654361  | H | -4.390020 | -2.545069 | 5.889801  |
| H | -1.558021 | 0.853329  | 5.077716  | H | -2.931606 | -0.767879 | 4.935252  |
| C | -0.250329 | -2.504931 | 0.631732  | H | 0.347617  | 0.002130  | -4.327624 |
| C | -1.313657 | -1.887728 | 1.362928  | H | 1.428366  | -1.320157 | -4.891881 |
| C | -0.602321 | -3.328117 | -0.474344 | H | 2.072362  | 0.341799  | -4.683081 |
| C | -2.660412 | -2.119634 | 1.006906  | H | 1.105182  | 4.726574  | -2.292295 |
| C | -1.937263 | -3.533248 | -0.833786 | H | -0.759125 | 6.239283  | -1.649620 |
| C | -2.972296 | -2.933495 | -0.086455 | H | -2.225493 | 5.680054  | 0.309428  |
| H | -1.103298 | -1.299410 | 2.271881  | H | -1.807756 | 3.578819  | 1.613706  |
| H | 0.192683  | -3.806273 | -1.065782 | H | 0.025458  | 2.050124  | 0.954525  |
| H | -3.458787 | -1.662202 | 1.609025  | H | 3.615406  | 1.891410  | -3.207216 |
| H | -2.180385 | -4.165973 | -1.701190 | H | 3.286149  | 3.605762  | -2.819420 |
| H | -4.023495 | -3.107908 | -0.363451 | H | 2.042075  | 2.617705  | -3.668649 |
| C | 1.841508  | -2.820988 | 2.953244  | C | -1.399269 | 1.014220  | 3.382127  |
| C | 3.163133  | -2.870136 | 3.455100  | H | -0.670793 | 1.763639  | 3.014317  |
| C | 0.788297  | -3.124171 | 3.844927  | H | -2.414070 | 1.447704  | 3.280607  |
| C | 3.424456  | -3.182584 | 4.796752  | H | -1.185720 | 0.847426  | 4.457041  |
| C | 1.042465  | -3.437807 | 5.190104  | C | 3.492494  | 2.196804  | 0.082731  |
| C | 2.361315  | -3.461369 | 5.670627  | C | 4.753321  | 1.611758  | -0.179794 |
| H | 4.012227  | -2.638954 | 2.791100  | C | 3.312730  | 2.838335  | 1.328950  |
| H | -0.252173 | -3.117094 | 3.485291  | C | 5.785043  | 1.642986  | 0.770910  |
| H | 4.461672  | -3.200914 | 5.165209  | C | 4.340000  | 2.871272  | 2.286951  |
| H | 0.205060  | -3.668659 | 5.866938  | C | 5.578118  | 2.269135  | 2.011716  |
| H | 2.561892  | -3.702812 | 6.725875  | H | 4.935503  | 1.107530  | -1.141339 |

Conformation 27.

Multiplicity: 5

Charge: 0

E(B97-3c) = -4543.373511532836 Hartree  
 E(M06/def2-TZVP) = -4543.376078082881 Hartree  
 E(PBE - D3(BJ)/def2-TZVP) = -4541.722502909398 Hartree  
 E(PBE0 - D3(BJ)/def2-TZVP) = -4542.048319576493 Hartree  
 E(PBEh-3c) = -4537.459303363538 Hartree  
 E(PM6) = 214.02917 Kcal/mol  
 E(PM7) = -10.75376 Kcal/mol  
 E( $\omega$ B97X-V/def2-TZVP) = -4545.914376560694 Hartree  
 E(GFN1-xTB) = -154.673473282311 Hartree  
 E(GFN2-xTB) = -153.633378270335 Hartree  
 E(GFN-FF) = -21.472010168773 Hartree

Coordinates:

|    |           |           |           |
|----|-----------|-----------|-----------|
| Fe | 0.094271  | -0.453360 | -0.303630 |
| Si | -3.053055 | -0.241472 | -0.155846 |
| Si | -1.238829 | -0.597667 | 2.406487  |
| Si | 1.799734  | -0.806180 | -2.471005 |
| Si | 2.105971  | 2.070796  | -1.214833 |
| N  | -1.528578 | -0.437300 | 0.689692  |
| N  | 1.468713  | 0.443058  | -1.287842 |
| C  | -2.654459 | 0.262284  | -1.943618 |
| C  | -1.844655 | 1.393129  | -2.202951 |
| C  | -1.567695 | 1.810403  | -3.514316 |
| C  | -2.095468 | 1.098110  | -4.602526 |
| C  | -2.896627 | -0.032944 | -4.369488 |
| C  | -3.172578 | -0.441162 | -3.054878 |
| C  | -4.082876 | 1.124116  | 0.675519  |
| C  | -4.226891 | 2.418538  | 0.130008  |
| C  | -4.935423 | 3.421502  | 0.811972  |
| C  | -5.520320 | 3.147972  | 2.058211  |
| C  | -5.401190 | 1.862813  | 2.613353  |
| C  | -4.694130 | 0.864492  | 1.925490  |
| C  | -4.106389 | -1.809994 | -0.188422 |
| C  | -2.353918 | -1.921674 | 3.177306  |
| C  | -2.525706 | -3.160526 | 2.517019  |
| C  | -3.341304 | -4.166232 | 3.057329  |
| C  | -4.013128 | -3.948182 | 4.271571  |
| C  | -3.861904 | -2.723065 | 4.940120  |
| C  | -3.037534 | -1.723525 | 4.397684  |
| C  | 1.374118  | -0.407995 | -4.262565 |
| C  | 0.731183  | 3.275805  | -0.706762 |
| C  | 0.477457  | 4.464785  | -1.425563 |
| C  | -0.575048 | 5.324108  | -1.065591 |
| C  | -1.393694 | 5.014629  | 0.031405  |
| C  | -1.156778 | 3.842441  | 0.767322  |
| C  | -0.107843 | 2.989365  | 0.395112  |
| C  | 2.824745  | 2.599465  | -2.883673 |
| H  | -1.422716 | 1.968708  | -1.367488 |
| H  | -0.934781 | 2.696571  | -3.677230 |
| H  | -1.882611 | 1.421260  | -5.633324 |
| H  | -3.312208 | -0.597137 | -5.219064 |
| H  | -3.803185 | -1.329474 | -2.893241 |
| H  | -3.772645 | 2.653382  | -0.844957 |
| H  | -5.030276 | 4.423909  | 0.365420  |
| H  | -6.074484 | 3.933493  | 2.595039  |
| H  | -5.863035 | 1.636694  | 3.587237  |
| H  | -4.607723 | -0.134983 | 2.383890  |
| H  | -4.424481 | -2.095868 | 0.832798  |

Conformation 3.

Multiplicity: 5

Charge: 0

E(B97-3c) = -4543.374459280310 Hartree  
 E(M06/def2-TZVP) = -4543.378788184949 Hartree  
 E(PBE - D3(BJ)/def2-TZVP) = -4541.721998648313 Hartree  
 E(PBE0 - D3(BJ)/def2-TZVP) = -4542.050426495231 Hartree  
 E(PBEh-3c) = -4537.462565938135 Hartree  
 E(PM6) = 197.86854 Kcal/mol  
 E(PM7) = -2.31902 Kcal/mol  
 E( $\omega$ B97X-V/def2-TZVP) = -4545.918446776725 Hartree  
 E(GFN1-xTB) = -154.674435226022 Hartree  
 E(GFN2-xTB) = -153.633782870437 Hartree  
 E(GFN-FF) = -21.591039594908 Hartree

Coordinates:

|    |           |           |           |
|----|-----------|-----------|-----------|
| Fe | 0.243001  | 0.299894  | 0.414860  |
| Si | -0.349691 | 2.810784  | -1.014597 |
| Si | -2.585466 | 0.696002  | -1.252314 |
| Si | 1.564375  | -2.534421 | -0.390110 |
| Si | 1.324981  | -1.455849 | 2.540258  |
| N  | -1.047330 | 1.254927  | -0.614003 |
| N  | 1.177305  | -1.316369 | 0.806669  |
| C  | 1.445887  | 2.719151  | -0.382264 |



|   |           |           |           |   |           |           |           |
|---|-----------|-----------|-----------|---|-----------|-----------|-----------|
| H | -3.751897 | -1.202290 | -3.326412 | C | -3.307356 | 4.309617  | -0.856375 |
| C | 1.832959  | 1.629517  | 2.929949  | C | 2.395069  | -2.496396 | -1.837986 |
| H | 1.014645  | 2.290910  | 2.583468  | C | 2.428365  | -3.509726 | 1.529751  |
| H | 1.517047  | 1.167903  | 3.886365  | C | 2.618943  | -4.815582 | 1.022258  |
| H | 2.718364  | 2.271372  | 3.117035  | C | 3.904547  | -5.307050 | 0.745687  |
| C | 0.104963  | -1.866703 | -2.244323 | C | 5.029969  | -4.500741 | 0.980070  |
| C | 1.434617  | -1.344797 | -2.263224 | C | 4.862845  | -3.207055 | 1.501024  |
| C | -0.064966 | -3.233484 | -1.887654 | C | 3.574999  | -2.720704 | 1.772318  |
| C | 2.535855  | -2.166448 | -1.940713 | C | -0.471504 | -4.213092 | 2.224509  |
| C | 1.030562  | -4.039140 | -1.563568 | H | 3.944488  | 1.992068  | 0.998999  |
| C | 2.336432  | -3.506388 | -1.591878 | H | 5.090336  | 2.722404  | 3.078886  |
| H | 1.629089  | -0.322500 | -2.627868 | H | 3.974541  | 4.345751  | 4.632605  |
| H | -1.077121 | -3.664061 | -1.856781 | H | 1.691275  | 5.230349  | 4.075920  |
| H | 3.551071  | -1.746104 | -1.983556 | H | 0.528483  | 4.472586  | 2.015746  |
| H | 0.872541  | -5.094021 | -1.290784 | H | 0.112942  | 2.746961  | -2.951077 |
| H | 3.197482  | -4.147853 | -1.348230 | H | -0.531514 | 4.171997  | -4.443454 |
| C | 2.596552  | 1.185726  | -0.015999 | H | -0.220637 | 6.995305  | -3.699992 |
| C | 3.734221  | 0.879006  | -0.797656 | H | 0.778163  | 7.472779  | -1.448870 |
| C | 1.694595  | 2.154426  | -0.522942 | H | 1.443245  | 5.600424  | 0.047233  |
| C | 3.943899  | 1.483746  | -2.046458 | H | 1.847853  | 1.007402  | -2.051095 |
| C | 1.901505  | 2.771122  | -1.769688 | H | 2.619518  | 0.475632  | -0.528288 |
| C | 3.023689  | 2.426242  | -2.537653 | H | 3.307002  | 1.862398  | -1.448900 |
| H | 4.469759  | 0.151891  | -0.418753 | H | -2.126587 | 1.446245  | -2.314702 |
| H | 0.824210  | 2.474291  | 0.071462  | H | -3.211921 | 2.474063  | -4.299041 |
| H | 4.834836  | 1.224677  | -2.639722 | H | -4.330525 | 4.715488  | -4.105275 |
| H | 1.183974  | 3.522733  | -2.129283 | H | -4.375261 | 5.894752  | -1.894133 |
| H | 3.188442  | 2.900340  | -3.517672 | H | -3.341573 | 4.840505  | 0.108040  |
| C | -1.686389 | 3.400773  | -1.672169 | H | 2.808289  | -1.473422 | -1.740272 |
| C | -1.549301 | 3.708743  | -3.045981 | H | 2.536275  | -2.821602 | -2.889376 |
| C | -1.218903 | 4.350433  | -0.736089 | H | 2.989259  | -3.163837 | -1.184442 |
| C | -0.945327 | 4.902657  | -3.469398 | H | 1.748780  | -5.458019 | -0.814743 |
| C | -0.611109 | 5.546938  | -1.152281 | H | 4.027550  | -6.323514 | 0.340309  |
| C | -0.468068 | 5.823456  | -2.521352 | H | 6.039113  | -4.882079 | 0.759854  |
| H | -1.907985 | 2.998763  | -3.807202 | H | 5.742516  | -2.573805 | 1.695047  |
| H | -1.332488 | 4.153236  | 0.341899  | H | 3.461722  | -1.704032 | 2.181200  |
| H | -0.843856 | 5.112893  | -4.545682 | H | -1.520321 | -3.864118 | 2.293067  |
| H | -0.247185 | 6.267351  | -0.403320 | H | -0.164158 | -4.634076 | 3.204312  |
| H | 0.010581  | 6.758861  | -2.850081 | H | -0.443496 | -5.029438 | 1.477284  |
| C | -2.821506 | 1.828094  | 0.711300  | C | -2.066129 | 3.303674  | 2.078889  |
| C | -4.141479 | 1.849340  | 1.212733  | H | -1.493338 | 2.875074  | 2.925871  |
| C | -1.766957 | 1.820028  | 1.653945  | H | -1.690482 | 4.332127  | 1.900649  |
| C | -4.396737 | 1.849090  | 2.595123  | H | -3.132962 | 3.373032  | 2.374990  |
| C | -2.009160 | 1.824129  | 3.034996  | C | 0.631419  | -1.458855 | 3.063022  |
| C | -3.331218 | 1.835931  | 3.508457  | C | -0.058500 | -1.652298 | 4.282310  |
| H | -4.993183 | 1.853924  | 0.513906  | C | 1.214735  | -0.185662 | 2.837485  |
| H | -0.723902 | 1.766676  | 1.303742  | C | -0.193901 | -0.617725 | 5.220291  |
| H | -5.435458 | 1.853830  | 2.960573  | C | 1.090901  | 0.854307  | 3.777123  |
| H | -1.167703 | 1.791636  | 3.742394  | C | 0.374509  | 0.642433  | 4.963161  |
| H | -3.526697 | 1.824718  | 4.591770  | H | -0.512205 | -2.632013 | 4.499702  |
|   |           |           |           | H | 1.800876  | 0.002070  | 1.922117  |
|   |           |           |           | H | -0.747423 | -0.792566 | 6.156197  |
|   |           |           |           | H | 1.553310  | 1.829313  | 3.577079  |
|   |           |           |           | H | 0.268793  | 1.458857  | 5.694122  |
|   |           |           |           | C | -2.690344 | 0.526731  | 0.865652  |
|   |           |           |           | C | -3.624744 | -0.084127 | -0.016421 |
|   |           |           |           | C | -2.370258 | -0.164586 | 2.078023  |
|   |           |           |           | C | -4.183317 | -1.333715 | 0.268425  |
|   |           |           |           | C | -2.946817 | -1.424523 | 2.360170  |
|   |           |           |           | C | -3.836828 | -2.012150 | 1.456507  |
|   |           |           |           | H | -3.911935 | 0.441454  | -0.939570 |
|   |           |           |           | H | -1.760573 | 0.324116  | 2.856807  |
|   |           |           |           | H | -4.903369 | -1.786417 | -0.430878 |
|   |           |           |           | H | -2.701722 | -2.925514 | 3.307559  |
|   |           |           |           | H | -4.286439 | -2.990978 | 1.684194  |
|   |           |           |           | C | -0.388203 | -1.463256 | -2.616841 |
|   |           |           |           | C | 0.279058  | -0.708395 | -3.608196 |
|   |           |           |           | C | -1.801993 | -1.482155 | -2.650959 |
|   |           |           |           | C | -0.429842 | -0.010137 | -4.599604 |
|   |           |           |           | C | -2.517878 | -0.799571 | -3.645909 |
|   |           |           |           | C | -1.831801 | -0.068377 | -4.629490 |
|   |           |           |           | H | 1.379579  | -0.677662 | -3.621903 |
|   |           |           |           | H | -2.359266 | -2.055072 | -1.894763 |
|   |           |           |           | H | 0.116090  | 0.568866  | -5.360588 |
|   |           |           |           | H | -3.618298 | -0.835795 | -3.654074 |
|   |           |           |           | H | -2.390404 | 0.457920  | -5.418805 |
|   |           |           |           | C | -0.078704 | -4.315661 | -1.524767 |
|   |           |           |           | C | -1.360446 | -4.650496 | -1.028318 |
|   |           |           |           | C | 0.681864  | -5.343278 | -2.125492 |
|   |           |           |           | C | -1.866986 | -5.954758 | -1.133762 |
|   |           |           |           | C | 0.185170  | -6.653338 | -2.229463 |
|   |           |           |           | C | -1.092449 | -6.961260 | -1.735095 |
|   |           |           |           | H | -1.964258 | -3.878213 | -0.524348 |
|   |           |           |           | H | 1.688264  | -5.122952 | -2.515100 |
|   |           |           |           | H | -2.867804 | -6.191563 | -0.738342 |
|   |           |           |           | H | 0.798626  | -7.438977 | -2.698986 |
|   |           |           |           | H | -1.483471 | -7.987780 | -1.814718 |

Conformation 5.

Multiplicity: 5

Charge: 0

E(B97-3c) = -4543.364294641642 Hartree

E(M06/def2-TZVP) = -4543.369541128376 Hartree

E(PBE - D3(BJ)/def2-TZVP) = -4541.714858146132 Hartree

E(PBE0 - D3(BJ)/def2-TZVP) = -4542.039604271005 Hartree

E(PBEh-3c) = -4537.450386252622 Hartree

E(PM6) = 210.47233 Kcal/mol

E(PM7) = -2.08331 Kcal/mol

E( $\omega$ B97X-V/def2-TZVP) = -4545.913181392230 Hartree

E(GFN1-xTB) = -154.667415494971 Hartree

E(GFN2-xTB) = -153.622833951079 Hartree

E(GFN-FF) = -21.452200643952 Hartree

Coordinates:

|    |           |           |           |   |           |           |           |
|----|-----------|-----------|-----------|---|-----------|-----------|-----------|
| Fe | -0.432185 | -0.190236 | 0.559097  | C | -1.801993 | -1.482155 | -2.650959 |
| Si | 1.228972  | 2.549288  | -0.206720 | C | -0.429842 | -0.010137 | -4.599604 |
| Si | -1.859078 | 2.225320  | 0.540553  | C | -2.517878 | -0.799571 | -3.645909 |
| Si | 0.566195  | -2.533208 | -1.362706 | C | -1.831801 | -0.068377 | -4.629490 |
| Si | 0.678076  | -2.803744 | 1.716878  | H | 1.379579  | -0.677662 | -3.621903 |
| N  | -0.221046 | 1.684406  | 0.255525  | H | -2.359266 | -2.055072 | -1.894763 |
| N  | 0.207126  | -1.956829 | 0.251916  | H | 0.116090  | 0.568866  | -5.360588 |
| C  | 2.145300  | 3.176695  | 1.337545  | H | -3.618298 | -0.835795 | -3.654074 |
| C  | 3.435108  | 2.703477  | 1.667789  | H | -2.390404 | 0.457920  | -5.418805 |
| C  | 4.088521  | 3.113683  | 2.842087  | C | -0.078704 | -4.315661 | -1.524767 |
| C  | 3.465084  | 4.021751  | 3.712021  | C | -1.360446 | -4.650496 | -1.028318 |
| C  | 2.186701  | 4.515196  | 3.400453  | C | 0.681864  | -5.343278 | -2.125492 |
| C  | 1.537886  | 4.090595  | 2.230798  | C | -1.866986 | -5.954758 | -1.133762 |
| C  | 0.812884  | 4.025639  | -1.323437 | C | 0.185170  | -6.653338 | -2.229463 |
| C  | 0.268529  | 3.781933  | -2.606414 | C | -1.092449 | -6.961260 | -1.735095 |
| C  | -0.098375 | 4.835925  | -3.454952 | H | -1.964258 | -3.878213 | -0.524348 |
| C  | 0.074452  | 6.165844  | -3.038556 | H | 1.688264  | -5.122952 | -2.515100 |
| C  | 0.628496  | 6.431979  | -1.777221 | H | -2.867804 | -6.191563 | -0.738342 |
| C  | 0.996876  | 5.371249  | -0.932991 | H | 0.798626  | -7.438977 | -2.698986 |
| C  | 2.365494  | 1.365664  | -1.139820 | H | -1.483471 | -7.987780 | -1.814718 |
| C  | -2.672007 | 3.052513  | -0.947328 |   |           |           |           |
| C  | -2.642655 | 2.412269  | -2.206383 |   |           |           |           |
| C  | -3.243264 | 2.995742  | -3.330423 |   |           |           |           |
| C  | -3.867471 | 4.248941  | -3.221795 |   |           |           |           |
| C  | -3.894107 | 4.908238  | -1.983209 |   |           |           |           |

**FUHWAG**

Conformation 14.

Multiplicity: 2  
 Charge: 0  
 E(B97-3c) = -5613.021580151656 Hartree  
 E(M06/def2-TZVP) = -5612.879251329144 Hartree  
 E(PBE - D3(BJ)/def2-TZVP) = -5610.938177584495 Hartree  
 E(PBE0 - D3(BJ)/def2-TZVP) = -5611.171797824234 Hartree  
 E(PBEh-3c) = -5604.822709670281 Hartree  
 E(PM6) = 180.72323 Kcal/mol  
 E(PM7) = 67.30399 Kcal/mol  
 E( $\omega$ B97X-V/def2-TZVP) = -5614.579160365128 Hartree  
 E(GFN1-xTB) = -265.539275425151 Hartree  
 E(GFN2-xTB) = -259.271386044267 Hartree  
 E(GFN-FF) = -33.821492421922 Hartree

Coordinates:

|    |           |           |           |
|----|-----------|-----------|-----------|
| Cu | -1.360647 | 0.573347  | 0.442464  |
| N  | -0.811586 | 2.417758  | 1.091880  |
| N  | -1.778689 | 1.329365  | -1.393860 |
| N  | -1.833886 | -1.291849 | -0.228677 |
| N  | -0.868227 | -0.199834 | 2.252303  |
| C  | -0.277515 | 2.740294  | 2.322166  |
| C  | -0.798179 | 3.580142  | 0.349960  |
| C  | -1.730559 | 2.659488  | -1.760648 |
| C  | -2.190202 | 0.635978  | -2.513822 |
| C  | -2.191013 | -1.638867 | -1.518277 |
| C  | -1.707832 | -2.476606 | 0.462854  |
| C  | -0.947989 | -1.523915 | 2.629408  |
| C  | -0.456357 | 0.496160  | 3.370872  |
| C  | 0.100713  | 4.142451  | 2.350568  |
| C  | -0.227729 | 4.664288  | 1.125968  |
| C  | -2.153813 | 2.812592  | -3.138533 |
| C  | -2.418267 | 1.552655  | -3.613918 |
| C  | -2.333760 | -3.078107 | -1.627848 |
| C  | -2.023812 | -3.598486 | -0.399521 |
| C  | -0.624862 | -1.662221 | 4.035126  |
| C  | -0.330132 | -0.405376 | 4.499923  |
| C  | -1.247460 | 3.725341  | -0.974719 |
| C  | -2.347511 | -0.760863 | -2.607336 |
| C  | -1.266685 | -2.608255 | 1.791624  |
| C  | -0.123276 | 0.864270  | 3.415633  |
| O  | 2.073226  | 4.693643  | -4.614880 |
| O  | 1.269341  | -3.169770 | -5.223627 |
| O  | 1.091408  | -2.797257 | 0.250964  |
| O  | -2.424256 | 4.929674  | 6.812225  |
| N  | 0.831618  | 4.125412  | -2.763265 |
| N  | -0.210090 | -1.994077 | -3.882787 |
| N  | 3.223957  | -3.104645 | -3.174743 |
| N  | 5.288475  | -3.763083 | -3.828662 |
| N  | 1.453020  | -3.598845 | 2.369927  |
| N  | -1.592656 | 3.640054  | 5.074352  |
| N  | -3.769051 | 4.407212  | 3.469484  |
| N  | -3.795280 | 4.959796  | 1.275988  |
| C  | -1.089015 | 5.053710  | -1.643110 |
| C  | -0.027732 | 5.220044  | -2.579991 |
| C  | 0.120166  | 6.445945  | -3.260939 |
| C  | -0.772357 | 7.493919  | -2.993471 |
| C  | -1.806807 | 7.343458  | -2.055842 |
| C  | -1.963806 | 6.122025  | -1.381392 |
| C  | -2.538388 | -1.362387 | -3.964089 |
| C  | -1.417663 | -1.976755 | -4.598300 |
| C  | -1.554225 | -2.533977 | -5.886561 |
| C  | -2.794831 | -2.477783 | -6.536082 |
| C  | -3.905042 | -1.876938 | -5.922544 |
| C  | -3.768882 | -1.323365 | -4.640270 |
| C  | -1.008394 | -3.980133 | 2.312351  |
| C  | 0.318422  | -4.419764 | 2.578000  |
| C  | 0.526973  | -5.700629 | 3.131438  |
| C  | -0.549133 | -6.550502 | 3.410265  |
| C  | -1.858973 | -6.135053 | 3.124995  |
| C  | -2.075061 | -4.861924 | 2.582019  |
| C  | 0.447701  | 2.400867  | 4.689584  |
| C  | -0.309430 | 3.276440  | 5.517780  |
| C  | 0.233033  | 3.739280  | 6.736220  |
| C  | 1.520294  | 3.342088  | 7.119962  |
| C  | 2.280929  | 2.485719  | 6.309346  |
| C  | 1.737692  | 2.020067  | 5.104014  |
| C  | 1.765714  | 3.881388  | -3.746263 |
| C  | 2.361749  | 2.442753  | -3.713147 |
| C  | 3.813864  | 2.533135  | -4.210953 |
| C  | 1.517265  | 1.599973  | -4.697050 |
| C  | 2.330361  | 1.794869  | -2.314382 |
| C  | 1.003185  | -2.569064 | -4.190068 |
| C  | 2.034660  | -2.303839 | -3.073514 |
| C  | 3.533622  | -4.219287 | -2.401734 |
| C  | 4.839236  | -4.601958 | -2.819305 |
| C  | 5.469529  | -5.687980 | -2.184267 |
| C  | 4.804245  | -6.372795 | -1.154336 |
| C  | 3.482456  | -5.980244 | -0.761325 |
| C  | 2.839813  | -4.900409 | -1.393434 |
| C  | 4.314538  | -2.890724 | -4.020838 |
| C  | 4.332256  | -1.781876 | -5.017159 |

|   |           |           |           |
|---|-----------|-----------|-----------|
| C | 5.477088  | -7.532335 | -0.460906 |
| C | 2.768783  | -6.723711 | 0.340754  |
| C | 1.780479  | -2.827713 | 1.268852  |
| C | 3.074118  | -1.992937 | 1.444129  |
| C | 4.257967  | -2.914392 | 1.809026  |
| C | 3.377244  | -1.279979 | 0.118789  |
| C | 2.832445  | -0.941639 | 2.550275  |
| C | -2.532092 | 4.419254  | 5.701993  |
| C | -3.837729 | 4.592212  | 4.902915  |
| C | -4.010718 | 3.221287  | 2.725993  |
| C | -4.047371 | 3.599710  | 1.402668  |
| C | -4.338369 | 2.629655  | 0.429704  |
| C | -4.554693 | 1.298139  | 0.821416  |
| C | -4.433694 | 0.920227  | 2.200438  |
| C | -4.173586 | 1.891840  | 3.184916  |
| C | -3.632483 | 5.412734  | 2.505860  |
| C | -3.305952 | 6.819899  | 2.872818  |
| C | -4.954596 | 0.268771  | -0.204973 |
| C | -4.598555 | -0.524342 | -3.990318 |
| H | 0.568031  | 4.647708  | 3.202908  |
| H | -0.098582 | 5.687669  | 0.759315  |
| H | -2.218381 | 3.769580  | -3.666928 |
| H | -2.746186 | 1.257981  | -4.616084 |
| H | -2.622628 | -3.609347 | -2.541006 |
| H | -1.989952 | -4.650588 | -0.101225 |
| H | -0.643437 | -2.606542 | 4.589821  |
| H | -0.047496 | -0.102802 | 5.513444  |
| H | 0.932589  | 6.545675  | -3.990754 |
| H | -0.650087 | 8.447436  | -3.529979 |
| H | -2.499342 | 8.174482  | -1.854228 |
| H | -2.769890 | 5.963543  | -0.644522 |
| H | -0.678340 | -3.003557 | -6.350720 |
| H | -2.891072 | -2.915375 | -7.541312 |
| H | -4.875989 | -1.841181 | -6.438074 |
| H | -4.628690 | -0.851999 | -4.140395 |
| H | 1.558457  | -6.031616 | 3.326628  |
| H | -0.360719 | -7.545135 | 3.840961  |
| H | -2.712218 | -6.796455 | 3.335376  |
| H | -3.098826 | -4.513368 | 2.378657  |
| H | -0.376253 | 4.399824  | 7.363985  |
| H | 1.931787  | 3.711921  | 8.071370  |
| H | 3.293291  | 2.180604  | 6.612546  |
| H | 2.315571  | 1.345635  | 4.454653  |
| H | 0.653724  | 3.349381  | -2.122772 |
| H | -0.276559 | -1.567926 | -2.953086 |
| H | 2.183677  | -3.683363 | 3.078576  |
| H | -1.840607 | 3.292658  | 4.140668  |
| H | 4.241427  | 1.518654  | -4.343298 |
| H | 3.853174  | 3.070446  | -5.176584 |
| H | 4.450994  | 3.085542  | -3.490966 |
| H | 1.946881  | 0.581718  | -4.802004 |
| H | 0.467757  | 1.499978  | -4.350661 |
| H | 1.506891  | 2.068259  | -5.700903 |
| H | 2.877248  | 0.829841  | -2.336782 |
| H | 2.823200  | 2.429368  | -1.549960 |
| H | 1.301667  | 1.559350  | -1.962458 |
| H | 2.304914  | -1.226633 | -3.123100 |
| H | 1.578846  | -2.457151 | -2.071716 |
| H | 6.481440  | -5.987696 | -2.496401 |
| H | 1.828943  | -4.600412 | -1.083480 |
| H | 5.282382  | -1.830037 | -5.577208 |
| H | 3.483044  | -1.872800 | -5.724837 |
| H | 4.264257  | -0.784309 | -4.531511 |
| H | 5.581127  | -7.359356 | 0.632164  |
| H | 4.897888  | -8.474322 | -0.571356 |
| H | 6.489697  | -7.711705 | -0.870130 |
| H | 2.666033  | -7.806539 | 0.114222  |
| H | 3.322303  | -6.663572 | 1.304014  |
| H | 1.753384  | -6.317295 | 0.510795  |
| H | 5.195541  | -2.323543 | 1.844319  |
| H | 4.145595  | -3.385593 | 2.809002  |
| H | 4.386897  | -3.719274 | 1.056706  |
| H | 4.260965  | -0.622620 | 0.240227  |
| H | 3.597368  | -2.009301 | -0.683728 |
| H | 2.518012  | -0.659015 | -0.200065 |
| H | 3.736435  | -0.310375 | 2.673726  |
| H | 1.981500  | -0.282367 | 2.286594  |
| H | 2.601005  | -1.403942 | 3.530713  |
| H | -4.582899 | 3.882442  | 5.322161  |
| H | -4.206456 | 5.607982  | 5.139018  |
| H | -4.406186 | 2.918683  | -0.629005 |
| H | -4.094859 | 1.595569  | 4.242495  |
| H | -2.349194 | 6.879945  | 3.432681  |
| H | -3.211871 | 7.413478  | 1.946486  |
| H | -4.091088 | 7.283117  | 3.507172  |
| H | -5.981253 | -0.110371 | -0.011362 |
| H | -4.937073 | 6.695137  | -1.225696 |
| H | -4.284407 | -0.612861 | -0.195824 |
| H | -3.862414 | -1.170012 | 2.075232  |
| H | -4.452894 | -0.663416 | 3.686456  |
| H | -5.604779 | -0.912673 | 2.333273  |

Conformation 15.  
 Multiplicity: 2  
 Charge: 0  
 E(B97-3c) = -5613.034887372199 Hartree  
 E(M06/def2-TZVP) = -5612.897545713929 Hartree  
 E(PBE - D3(BJ)/def2-TZVP) = -5610.951484627647 Hartree  
 E(PBE0 - D3(BJ)/def2-TZVP) = -5611.184342259526 Hartree  
 E(PBEh-3c) = -5604.838391608740 Hartree  
 E(PM6) = 188.52835 Kcal/mol  
 E(PM7) = 51.88305 Kcal/mol  
 E( $\omega$ B97X-V/def2-TZVP) = -5614.592697511664 Hartree  
 E(GFN1-xTB) = -265.552589281974 Hartree  
 E(GFN2-xTB) = -259.283545067739 Hartree  
 E(GFN-FF) = -33.836955993219 Hartree

Coordinates:

|    |           |           |           |   |           |           |           |
|----|-----------|-----------|-----------|---|-----------|-----------|-----------|
| Cu | 1.352590  | 1.461207  | 0.287010  | C | -2.603572 | -0.092096 | 2.238542  |
| N  | 2.484604  | 0.789626  | -1.264748 | C | -2.035535 | -0.371546 | 0.892436  |
| N  | 0.314708  | 2.640160  | -0.997144 | C | -3.485138 | 0.789426  | 8.075749  |
| N  | 0.262403  | 2.179056  | 1.846835  | C | -5.852018 | 2.011368  | 6.836616  |
| N  | 2.344701  | 0.233238  | 1.560983  | C | 0.707292  | -3.047780 | 4.587540  |
| C  | 3.524448  | -0.117356 | -1.191216 | C | 0.124539  | -3.874111 | 3.410201  |
| C  | 2.354917  | 1.119915  | -2.599933 | C | 0.542745  | -3.220636 | 2.076294  |
| C  | 0.473872  | 2.724287  | -2.368121 | C | 0.702089  | -5.293449 | 3.489032  |
| C  | -0.663037 | 3.559289  | -0.665550 | C | -1.413550 | -3.922108 | 3.518153  |
| C  | -0.705603 | 3.163800  | 1.790220  | C | 3.142024  | -4.473369 | -1.716116 |
| C  | 0.332980  | 1.783765  | 3.168716  | C | 1.659446  | -4.338802 | -2.131230 |
| C  | 2.134529  | 0.093151  | 2.920622  | C | 1.803013  | -3.042525 | -4.281931 |
| C  | 3.404267  | -0.596856 | 1.247298  | C | 1.241696  | -1.871764 | -4.724946 |
| C  | 4.072518  | -0.355755 | -2.512564 | C | 1.487520  | -1.378691 | -6.037857 |
| C  | 3.336019  | 0.399607  | -3.387882 | C | 2.293116  | -2.160869 | -6.880401 |
| C  | -0.439070 | 3.710129  | -2.914190 | C | 2.852876  | -3.397500 | -6.414664 |
| C  | -1.147260 | 4.223904  | -1.859256 | C | 2.605357  | -3.843835 | -5.104346 |
| C  | -1.254585 | 3.400070  | 3.111383  | C | 0.642907  | -2.047157 | -2.649228 |
| C  | -0.620545 | 2.533371  | 3.963315  | C | 0.088320  | -1.783194 | -1.294225 |
| C  | 3.075906  | -0.862255 | 3.472675  | C | 2.578274  | -1.689380 | -8.284680 |
| C  | 3.858665  | -1.294527 | 2.434075  | C | 3.719922  | -4.221226 | -7.332389 |
| C  | 1.406528  | 2.005754  | -3.145155 | C | 4.907214  | -1.029620 | -2.733510 |
| C  | -1.144500 | 3.832239  | 0.629493  | H | 3.429798  | 0.454462  | -4.476468 |
| C  | 1.185682  | 0.794552  | 3.693670  | H | -0.532553 | 3.966961  | -3.974418 |
| C  | 3.981765  | -0.766098 | -0.026268 | H | -1.929557 | 4.989517  | -1.877598 |
| O  | -2.534567 | 2.394312  | -5.597952 | H | -2.034191 | 4.132926  | 3.345656  |
| O  | -6.116710 | 2.967987  | 1.388366  | H | -0.791184 | -2.393996 | 5.034863  |
| O  | 1.523770  | -3.514625 | 5.380324  | H | 3.121803  | -1.172462 | 4.521746  |
| O  | 3.762986  | -5.517348 | -1.885151 | H | 4.678343  | -2.019784 | 2.459906  |
| N  | -0.799670 | 1.157068  | -4.756326 | H | -0.725413 | 1.950549  | -7.318585 |
| N  | -3.825021 | 3.109958  | 1.080282  | H | 1.201057  | 3.095667  | -8.443596 |
| N  | -3.819860 | 0.553233  | 2.433066  | H | 3.266307  | 3.659271  | -7.124209 |
| N  | -1.999927 | -0.374382 | 3.385485  | H | 3.350865  | 3.136723  | -4.675684 |
| N  | 0.263337  | -1.743283 | 4.658353  | H | -5.615389 | 5.138760  | 1.215009  |
| N  | 3.630655  | -3.324436 | -1.147900 | H | -5.036948 | 7.577283  | 1.032174  |
| N  | 1.390194  | -3.178728 | -2.957737 | H | -2.650263 | 8.282595  | 0.680780  |
| N  | 0.526649  | -1.228761 | -3.686447 | H | -0.857703 | 6.532160  | 0.504824  |
| C  | 1.386843  | 2.227724  | -4.621998 | H | 0.541491  | -2.137386 | 7.296190  |
| C  | 0.241882  | 1.870346  | -5.384904 | H | 1.264994  | -0.415961 | 8.969746  |
| C  | 0.180707  | 2.203650  | -6.753861 | H | 1.869509  | 1.900905  | 8.200480  |
| C  | 1.260709  | 2.844556  | -7.373659 | H | 1.810704  | 2.447394  | 5.756341  |
| C  | 2.415298  | 3.159308  | -6.638279 | H | 5.805562  | -4.935356 | -1.182270 |
| C  | 2.469052  | 2.856472  | -5.271332 | H | 8.089813  | -4.281951 | -0.359724 |
| C  | -2.213171 | 4.873081  | 0.768607  | H | 8.474405  | -1.990457 | 0.598321  |
| C  | -3.566911 | 4.487430  | 0.976150  | H | 6.559880  | -0.370813 | 0.735413  |
| C  | -4.579251 | 5.465130  | 1.066581  | H | -0.484241 | 0.378974  | -4.137907 |
| C  | -4.241075 | 6.820617  | 0.960136  | H | -2.976096 | 2.535142  | 1.080205  |
| C  | -2.909432 | 7.216775  | 0.762527  | H | -0.422882 | -1.363666 | 3.970761  |
| C  | -1.906521 | 6.241088  | 0.665670  | H | 2.989843  | -2.524977 | -1.117553 |
| C  | 1.121351  | 0.485838  | 5.153836  | H | -3.665580 | -1.492535 | -3.837679 |
| C  | 0.737575  | -0.807081 | 5.601152  | H | -3.146609 | -1.027721 | -5.488983 |
| C  | 0.809663  | -1.123405 | 6.973481  | H | -1.923808 | -1.253785 | -4.196087 |
| C  | 1.216445  | -0.156476 | 7.901258  | H | -5.250025 | 0.489927  | -3.690381 |
| C  | 1.553332  | 1.138306  | 7.473291  | H | -4.654691 | 2.152355  | -4.052004 |
| C  | 1.510317  | 1.448863  | 6.107851  | H | -4.795261 | 0.960172  | -5.367266 |
| C  | 5.128040  | -1.723967 | -0.146682 | H | -3.457323 | 0.197924  | -1.909903 |
| C  | 4.926228  | -3.020997 | -0.696193 | H | -1.731649 | 0.496251  | -2.292799 |
| C  | 5.994855  | -3.938596 | -0.766558 | H | -2.873557 | 1.870113  | -2.228084 |
| C  | 7.260987  | -3.560326 | -0.301008 | H | -5.803478 | 0.509671  | 1.722590  |
| C  | 7.477729  | -2.281884 | 0.235640  | H | -4.524138 | 0.987900  | 0.464782  |
| C  | 6.410542  | -1.374915 | 0.311113  | H | -1.783829 | -0.315593 | 6.252432  |
| C  | -2.136027 | 1.477154  | -4.881722 | H | -5.850797 | 1.804253  | 4.108449  |
| C  | -3.099002 | 0.611523  | -4.025377 | H | -1.068290 | -0.880872 | 1.033569  |
| C  | -2.942434 | -0.874360 | -4.410070 | H | -2.690151 | -1.016390 | 0.270906  |
| C  | -4.534119 | 1.080097  | -4.298254 | H | -1.837016 | 0.560028  | 0.321110  |
| C  | -2.767260 | 0.808712  | -2.530357 | H | -3.474513 | 1.831265  | 8.460802  |
| C  | -5.006943 | 2.451985  | 1.306947  | H | -4.317548 | 0.273041  | 8.599693  |
| C  | -4.814753 | 0.925183  | 1.446112  | H | -2.537548 | 0.307366  | 8.383220  |
| C  | -3.975961 | 0.716320  | 3.808495  | H | -6.285758 | 1.303525  | 7.574558  |
| C  | -2.827730 | 0.118747  | 4.389083  | H | -5.421994 | 2.848577  | 7.426711  |
| C  | -2.672160 | 0.133470  | 5.786169  | H | -6.682209 | 2.418873  | 6.229011  |
| C  | -3.654694 | 0.749558  | 6.577289  | H | 0.129391  | -3.804421 | 1.226266  |
| C  | -4.810449 | 1.347641  | 5.972311  | H | 0.167405  | -2.181994 | 1.990883  |
| C  | -4.974618 | 1.329671  | 4.575723  | H | 1.645899  | -3.184379 | 1.971544  |
|    |           |           |           | H | 0.315257  | -5.909595 | 2.651790  |
|    |           |           |           | H | 1.807544  | -5.275440 | 3.438855  |
|    |           |           |           | H | 0.427180  | -5.781469 | 4.443757  |
|    |           |           |           | H | -1.830750 | -4.550229 | 2.703211  |
|    |           |           |           | H | -1.727666 | -4.369407 | 4.482838  |
|    |           |           |           | H | -1.871496 | -2.915821 | 3.441816  |
|    |           |           |           | H | -1.400650 | -5.266563 | -2.677618 |
|    |           |           |           | H | 1.027171  | -4.288059 | -1.221634 |
|    |           |           |           | H | 1.067395  | -0.428110 | -6.395363 |
|    |           |           |           | H | 3.050590  | -4.781573 | -4.738608 |
|    |           |           |           | H | 0.877763  | -1.751415 | -0.514089 |
|    |           |           |           | H | -0.392626 | -0.791185 | -1.311565 |
|    |           |           |           | H | -0.661806 | -2.539569 | -0.983403 |
|    |           |           |           | H | 2.209835  | -2.410718 | -9.045012 |
|    |           |           |           | H | 2.100466  | -0.710992 | -8.482966 |
|    |           |           |           | H | 3.668134  | -1.576384 | -8.466726 |
|    |           |           |           | H | 4.612329  | -3.653595 | -7.672002 |

|                                                            |           |           |           |   |           |           |           |
|------------------------------------------------------------|-----------|-----------|-----------|---|-----------|-----------|-----------|
| H                                                          | 4.074796  | -5.143722 | -6.834930 | C | 3.689443  | -2.056987 | 0.686488  |
| H                                                          | 3.174435  | -4.519304 | -8.252934 | C | 3.334123  | -3.342310 | 0.155262  |
|                                                            |           |           |           | C | 3.539358  | -3.631658 | -1.205482 |
|                                                            |           |           |           | C | 4.889061  | -1.295654 | -3.629555 |
|                                                            |           |           |           | C | 5.295858  | -0.861972 | -4.996555 |
| Conformation 27.                                           |           |           |           | C | 3.560382  | -1.800354 | 2.167101  |
| Multiplicity: 2                                            |           |           |           | C | 2.748204  | -4.393755 | 1.062253  |
| Charge: 0                                                  |           |           |           | C | -4.437230 | -3.598228 | 0.013168  |
| E(B97-3c) = -5613.042555915213 Hartree                     |           |           |           | C | -4.940022 | -2.503692 | -0.964769 |
| E(M06/def2-TZVP) = -5612.901562009599 Hartree              |           |           |           | C | -5.855384 | -3.176425 | -1.996935 |
| E(PBE - D3(BJ)/def2-TZVP) = -5610.956789533199 Hartree     |           |           |           | C | -5.738677 | -1.455334 | -0.159689 |
| E(PBE0 - D3(BJ)/def2-TZVP) = -5611.191183441710 Hartree    |           |           |           | C | -3.751128 | -1.837212 | -1.685791 |
| E(PBEh-3c) = -5604.839522715391 Hartree                    |           |           |           | C | -1.665776 | 3.926443  | 3.029058  |
| E(PM6) = 174.80311 Kcal/mol                                |           |           |           | C | -2.622947 | 3.373691  | 1.947387  |
| E(PM7) = 47.79992 Kcal/mol                                 |           |           |           | C | -3.387509 | 1.273794  | 3.089218  |
| E( $\omega$ B97X-V/def2-TZVP) = -5614.598870664975 Hartree |           |           |           | C | -3.435204 | -0.089792 | 2.706008  |
| E(GFN1-xTB) = -265.559776830230 Hartree                    |           |           |           | C | -3.958154 | -1.041034 | 3.599443  |
| E(GFN2-xTB) = -259.287281656695 Hartree                    |           |           |           | C | -4.407797 | -0.621202 | 4.860993  |
| E(GFN-FF) = -33.850614778996 Hartree                       |           |           |           | C | -4.344878 | 0.762531  | 5.234754  |
|                                                            |           |           |           | C | -3.832735 | 1.719328  | 4.340383  |
| Coordinates:                                               |           |           |           | C | -2.527609 | 0.973364  | 1.040317  |
| Cu                                                         | 1.047128  | -0.274766 | -0.178021 | C | -1.867646 | 1.304174  | -0.255036 |
| N                                                          | 2.034567  | 1.410012  | 0.366673  | C | -4.957680 | -1.636915 | 5.831252  |
| N                                                          | 1.394981  | 0.156118  | -2.130589 | C | -4.830566 | 1.195558  | 6.594514  |
| N                                                          | 0.029503  | -1.934061 | -0.723305 | C | 3.361845  | 3.635652  | 2.511781  |
| N                                                          | 0.532691  | -0.599190 | 1.758905  | H | 4.163704  | 3.975152  | -0.082111 |
| C                                                          | 2.183092  | 1.911720  | 1.642266  | H | 2.539110  | 1.981417  | -4.712160 |
| C                                                          | 2.797590  | 2.214496  | -0.457116 | H | 1.003480  | -0.162542 | -5.457465 |
| C                                                          | 2.119358  | 1.218265  | -2.627270 | H | -0.885579 | -4.383683 | -2.839474 |
| C                                                          | 0.898422  | -0.519652 | -3.225816 | H | -1.345255 | -4.960581 | -0.209629 |
| C                                                          | -0.113023 | -2.429072 | -2.002726 | H | -1.120663 | -2.084758 | 4.282348  |
| C                                                          | -0.495590 | -2.888894 | 0.121926  | H | 0.111528  | 0.246129  | 4.990156  |
| C                                                          | -0.231414 | -1.636203 | 2.250098  | H | 3.498966  | 6.508425  | -3.491546 |
| C                                                          | 0.756885  | 0.253548  | 2.821899  | H | 5.701802  | 5.886618  | -4.525511 |
| C                                                          | 3.078774  | 3.051908  | 1.629767  | H | 6.588104  | 3.545379  | -4.304603 |
| C                                                          | 3.481633  | 3.222907  | 0.328438  | H | 5.219133  | 1.817894  | -3.036277 |
| C                                                          | 2.054795  | 1.233180  | -4.076102 | H | 1.148669  | -4.345128 | -6.974899 |
| C                                                          | 1.286987  | 0.158179  | -4.448808 | H | -1.213762 | -4.175413 | -7.814309 |
| C                                                          | -0.683813 | -3.761791 | -1.960771 | H | -2.920598 | -2.860800 | -6.519523 |
| C                                                          | -0.912214 | -4.051289 | -0.639894 | H | -2.244986 | -1.729951 | -4.381151 |
| C                                                          | -0.512533 | -1.423675 | 3.658081  | H | -4.604341 | -5.237268 | 2.230115  |
| C                                                          | 0.098218  | -0.247896 | 4.012529  | H | -3.512000 | -6.638332 | 3.987852  |
| C                                                          | 2.835307  | 2.159954  | -1.863853 | H | -1.114306 | -6.216882 | 4.627614  |
| C                                                          | 0.198777  | -1.742322 | -3.191047 | H | 0.162796  | -4.394511 | 3.470537  |
| C                                                          | -0.694848 | -2.741997 | 1.510211  | H | -0.348453 | 4.876451  | 5.298999  |
| C                                                          | 1.532894  | 1.427224  | 2.795409  | H | 1.579368  | 4.930396  | 6.913185  |
| O                                                          | 1.630978  | 7.068090  | -2.462834 | H | 3.471636  | 3.298952  | 6.672172  |
| O                                                          | 3.188315  | -4.616261 | -6.145886 | H | 3.449923  | 1.644477  | 4.778415  |
| O                                                          | -4.870137 | -4.748301 | -0.014543 | H | 1.489555  | 4.011742  | -1.616709 |
| O                                                          | -1.867772 | 5.011926  | 3.563373  | H | 2.221926  | -2.609250 | -3.868209 |
| N                                                          | 1.906269  | 4.812774  | -2.097165 | H | -3.132534 | -2.202539 | 0.868823  |
| N                                                          | 2.074721  | -3.174103 | -4.712684 | H | -0.586650 | 2.225387  | 2.719702  |
| N                                                          | 4.431288  | -2.592671 | -3.371808 | H | -1.631439 | 7.290401  | -0.477399 |
| N                                                          | 4.882959  | -0.534660 | -2.549535 | H | -0.015925 | 8.064927  | -0.644798 |
| N                                                          | -3.477060 | -3.181178 | 0.922517  | H | -0.949295 | 6.654886  | -2.104919 |
| N                                                          | -0.604676 | 3.094003  | 3.265316  | H | -0.553691 | 5.607715  | 1.008624  |
| N                                                          | -2.811604 | 1.939257  | 2.007846  | H | 0.676728  | 4.451579  | 0.397623  |
| N                                                          | -2.895327 | -0.239304 | 1.431934  | H | 1.125976  | 6.144437  | 0.746874  |
| C                                                          | 3.632772  | 3.196073  | -2.589414 | H | -1.972657 | 4.879098  | -1.135419 |
| C                                                          | 3.139942  | 4.527745  | -2.704328 | H | -1.289461 | 5.171012  | -2.763784 |
| C                                                          | 3.895378  | 5.489698  | -3.409716 | H | -0.619893 | 3.869841  | -1.731590 |
| C                                                          | 5.122883  | 5.125460  | -3.980109 | H | 4.570706  | -4.646944 | -3.733566 |
| C                                                          | 5.618180  | 3.817049  | -3.861512 | H | 5.273849  | 5.250300  | -5.001726 |
| C                                                          | 4.868786  | 2.855497  | -3.167181 | H | 4.468447  | -0.068356 | 0.241516  |
| C                                                          | -0.189765 | -2.383888 | -4.486549 | H | 3.263927  | -4.619415 | -1.605993 |
| C                                                          | 0.770240  | -3.122622 | -5.231181 | H | 5.566366  | 0.208122  | -4.965852 |
| C                                                          | 0.393560  | -3.768281 | -6.427924 | H | 6.167319  | -1.435692 | -5.376784 |
| C                                                          | -0.928905 | -3.667898 | -6.880207 | H | 4.467484  | -0.992889 | -5.723935 |
| C                                                          | -1.884205 | -2.935496 | -6.158827 | H | 2.555642  | -2.064385 | 2.551172  |
| C                                                          | -1.508767 | -2.301530 | -4.965279 | H | 4.291686  | -2.410038 | 2.741009  |
| C                                                          | -1.489333 | -3.788642 | 2.214347  | H | 3.742527  | -0.735891 | 2.408389  |
| C                                                          | -2.855098 | -4.013895 | 1.873082  | H | 3.441686  | -4.658312 | 1.888560  |
| C                                                          | -3.563503 | -5.052347 | 2.519020  | H | 1.810388  | -4.036629 | 1.536714  |
| C                                                          | -2.939923 | -5.835951 | 3.497532  | H | 2.508276  | -5.320560 | 0.507421  |
| C                                                          | -1.603455 | -5.601582 | 3.858112  | H | -6.257762 | -2.417269 | -2.698039 |
| C                                                          | -0.891450 | -4.581229 | 3.215574  | H | -5.304918 | -3.939474 | -2.581387 |
| C                                                          | 1.548369  | 2.311633  | 4.002766  | H | -6.701403 | -3.691328 | -1.503586 |
| C                                                          | 0.461632  | 3.216602  | 4.172648  | H | -6.157005 | -0.690386 | -0.846719 |
| C                                                          | 0.482791  | 4.166036  | 5.213372  | H | -6.584897 | -1.929411 | 0.377599  |
| C                                                          | 1.567836  | 4.188038  | 6.100841  | H | -5.101320 | -0.935721 | 0.580451  |
| C                                                          | 2.628471  | 3.278513  | 5.966105  | H | -4.120690 | -1.066783 | -2.394555 |
| C                                                          | 2.615318  | 2.348736  | 4.914148  | H | -3.059004 | -1.337361 | -0.981094 |
| C                                                          | 1.240760  | 6.016006  | -1.964623 | H | -3.167406 | -2.583597 | -2.258794 |
| C                                                          | -0.051735 | 5.924513  | -1.102949 | H | -3.585798 | 3.907036  | 2.078836  |
| C                                                          | -0.701914 | 7.314375  | -1.081178 | H | -4.006010 | -2.102455 | 3.319330  |
| C                                                          | 0.322308  | 5.501354  | 0.335917  | H | -3.779950 | -3.779950 | 4.629665  |
| C                                                          | -1.028950 | 4.901753  | -1.720535 | H | -0.905752 | 1.837403  | -0.101362 |
| C                                                          | 3.159757  | -3.878743 | -5.166508 | H | -1.650588 | 0.364786  | -0.793807 |
| C                                                          | 4.422345  | -3.703046 | -4.298491 | H | -2.505781 | 1.942347  | -0.901684 |
| C                                                          | 4.087883  | -2.630837 | -2.018684 | H | -6.011169 | -1.416270 | 6.106085  |
| C                                                          | 4.397300  | -1.334871 | -1.523212 |   |           |           |           |
| C                                                          | 4.200045  | -1.056533 | -0.158546 |   |           |           |           |

|   |           |           |          |   |           |           |           |
|---|-----------|-----------|----------|---|-----------|-----------|-----------|
| H | -4.924755 | -2.657259 | 5.403945 | C | 0.805770  | 0.445480  | -4.629887 |
| H | -4.385096 | -1.649311 | 6.783086 | C | 0.158424  | -0.771984 | -4.350270 |
| H | -4.275290 | 0.685356  | 7.410057 | C | -1.221123 | -0.895339 | -4.591454 |
| H | -4.715336 | 2.286747  | 6.737985 | C | -1.974343 | 0.223676  | -5.080049 |
| H | -5.901933 | 0.944138  | 6.745692 | C | -1.330749 | 1.436337  | -5.385259 |

Conformation 3.

Multiplicity: 2

Charge: 0

E(B97-3c) = -5613.028293440165 Hartree

E(M06/def2-TZVP) = -5612.884558904302 Hartree

E(PBE - D3(BJ)/def2-TZVP) = -5610.944305474064 Hartree

E(PBE0 - D3(BJ)/def2-TZVP) = -5611.177832988753 Hartree

E(PBEh-3c) = -5604.825993825991 Hartree

E(PM6) = 180.56968 Kcal/mol

E(PM7) = 63.92277 Kcal/mol

E( $\omega$ B97X-V/def2-TZVP) = -5614.582834209616 Hartree

E(GFN1-xTB) = -265.538406165897 Hartree

E(GFN2-xTB) = -259.267604748224 Hartree

E(GFN-FF) = -33.827463137018 Hartree

Coordinates:

|    |           |           |           |   |           |           |           |
|----|-----------|-----------|-----------|---|-----------|-----------|-----------|
| Cu | -0.760790 | -0.044570 | -1.390913 | C | 0.720854  | -2.740369 | 6.111633  |
| N  | 0.825794  | -1.294839 | -1.188298 | C | -0.573054 | -3.098818 | 6.771627  |
| N  | 0.489014  | 1.551391  | -1.425073 | C | 6.344016  | -1.311018 | 4.782059  |
| N  | -2.350265 | 1.214471  | -1.548919 | C | 5.129200  | -1.840149 | 2.122320  |
| N  | -2.021806 | -1.618510 | -1.170337 | H | 2.385812  | -4.265933 | -0.931033 |
| C  | 0.790672  | -2.667775 | -1.060933 | H | 4.083912  | -2.129231 | -1.150368 |
| C  | 2.159424  | -0.945113 | -1.224912 | H | 3.464658  | 3.116132  | -1.313975 |
| C  | 1.864713  | 1.517848  | -1.350157 | H | 1.324558  | 4.810525  | -1.486918 |
| C  | 0.138791  | 2.882405  | -1.515496 | H | -3.912248 | 4.147095  | -2.083286 |
| C  | -2.316667 | 2.582146  | -1.731432 | H | -5.608239 | 2.017335  | -1.802153 |
| C  | -3.683943 | 0.861858  | -1.542677 | H | -5.007356 | -3.128506 | -0.804861 |
| C  | -3.400105 | -1.572888 | -1.130785 | H | -2.866467 | -4.828713 | -0.614908 |
| C  | -1.676761 | -2.939171 | -0.969208 | H | 6.595813  | 1.437699  | 1.023691  |
| C  | 2.138454  | -3.203093 | -1.025759 | H | 8.022160  | 1.020191  | -1.002599 |
| C  | 2.989380  | -2.131801 | -1.131742 | H | 6.968677  | 0.299804  | -3.166348 |
| C  | 2.399641  | 2.866269  | -1.366107 | H | 4.449831  | 0.021639  | -3.283286 |
| C  | 1.326456  | 3.715508  | -1.456900 | H | -0.754919 | 7.311173  | -4.231118 |
| C  | -3.663002 | 3.097042  | -1.899307 | H | -1.791350 | 8.715329  | -2.425035 |
| C  | -4.514054 | 2.030614  | -1.758861 | H | -2.533145 | 7.652598  | -0.270723 |
| C  | -3.939766 | -2.896383 | -0.882078 | H | -2.229584 | 5.180583  | 0.052998  |
| C  | -2.868027 | -3.747124 | -0.787240 | H | -7.644211 | -0.465233 | 1.828912  |
| C  | 2.668945  | 0.364110  | -1.286203 | H | -9.413255 | -0.828007 | 0.074626  |
| C  | -1.164473 | 3.389857  | -1.694480 | H | -8.774515 | -1.009900 | -2.345830 |
| C  | -4.199649 | -0.426516 | -1.299270 | H | -6.353658 | 0.829914  | -3.005735 |
| C  | -0.369012 | -3.457977 | -0.931750 | H | 0.150892  | -6.914924 | 2.168300  |
| O  | 5.311709  | 1.661100  | 2.833676  | H | 0.190856  | -8.678083 | 0.374464  |
| O  | 0.164607  | 6.091374  | -5.817234 | H | -0.018955 | -8.026190 | -2.041364 |
| O  | -6.012909 | -0.205363 | 3.367896  | H | -0.275552 | -5.600497 | -2.652221 |
| O  | 0.060237  | -5.316618 | 3.758556  | H | 2.899637  | 1.076032  | 0.867293  |
| N  | 3.891340  | 1.184609  | 1.089578  | H | -0.237407 | 3.660170  | -3.803397 |
| N  | -0.330461 | 4.645553  | -4.073913 | H | -4.065061 | -0.169680 | 0.868461  |
| N  | 0.976999  | 2.546880  | -5.378660 | H | -0.183160 | -3.319729 | 1.291435  |
| N  | 2.135330  | 0.819205  | -4.483879 | H | 2.389322  | 1.990262  | 5.343201  |
| N  | -4.985413 | -0.238113 | 1.307498  | H | 3.332652  | 0.534869  | 4.868501  |
| N  | -0.107141 | -4.253189 | 1.706020  | H | 4.155307  | 2.116075  | 5.007208  |
| N  | 0.859617  | -2.688371 | 4.722387  | H | 0.808136  | 1.425704  | 3.474410  |
| N  | 1.848556  | -2.469284 | 6.742625  | H | 1.291779  | 1.443116  | 1.768560  |
| C  | 4.150299  | 0.549178  | -1.219668 | H | 1.792024  | 0.071346  | 2.837768  |
| C  | 4.750130  | 0.957650  | 0.005710  | H | 1.851474  | 3.797659  | 3.635397  |
| C  | 6.150595  | 1.125698  | 0.071418  | H | 3.609457  | 4.007363  | 3.329206  |
| C  | 6.931435  | 0.887201  | -1.067956 | H | 2.489138  | 3.686266  | 1.959996  |
| C  | 6.345238  | 0.484119  | -2.278823 | H | 0.040291  | 3.584222  | -6.939593 |
| C  | 4.953394  | 0.318210  | -2.349728 | H | 1.681051  | 4.137360  | -6.554524 |
| C  | -1.326498 | 4.864055  | -1.882644 | H | 0.737789  | -1.623507 | -3.965969 |
| C  | -0.905806 | 5.476453  | -3.097523 | H | -1.912730 | 2.289780  | -5.766028 |
| C  | -1.079388 | 6.864476  | -3.283846 | H | 4.256331  | 2.344252  | -4.441866 |
| C  | -1.662270 | 7.633708  | -2.268226 | H | 3.766236  | 3.170639  | -5.961111 |
| C  | -2.079073 | 7.042902  | -1.065580 | H | 3.281147  | 3.850606  | -4.375125 |
| C  | -1.910147 | 5.663023  | -0.883041 | H | -2.795512 | -2.127420 | -3.715952 |
| C  | -5.658077 | -0.546070 | -0.980432 | H | -2.274168 | -2.640863 | -5.338008 |
| C  | -6.029026 | -0.441281 | 0.393647  | H | -1.226786 | -2.958743 | -3.918782 |
| C  | -7.384769 | -0.545474 | 0.766085  | H | -3.726575 | -0.701987 | -5.990502 |
| C  | -8.356840 | -0.748170 | -0.223816 | H | -3.965674 | -0.160613 | -4.311219 |
| C  | -8.002947 | -0.850056 | -1.578442 | H | -3.907700 | 1.045800  | -5.632877 |
| C  | -6.652173 | -0.749107 | -1.949258 | H | -2.670740 | 1.742031  | 4.430387  |
| C  | -0.202341 | -4.910348 | -0.607158 | H | -3.686445 | 2.273606  | 3.047859  |
| C  | -0.080983 | -5.290361 | 0.759740  | H | -4.466148 | 1.680542  | 4.552901  |
| C  | 0.059476  | -6.649220 | 1.108029  | H | -2.537881 | -0.710176 | 5.062043  |
| C  | 0.079757  | -7.619126 | 0.096289  | H | -4.334519 | -0.820274 | 5.166791  |
| C  | -0.037311 | -7.257459 | -1.254954 | H | -3.433403 | -1.953737 | 4.116358  |
| C  | -0.179010 | -5.903974 | -1.598698 | H | -1.458431 | 0.064550  | 2.889319  |
| C  | 4.169036  | 1.555296  | 2.389802  | H | -2.388419 | -1.100520 | 1.901095  |
| C  | 2.912227  | 1.925597  | 3.224624  | H | -2.422952 | 0.658717  | 1.523264  |
| C  | 3.214219  | 1.622889  | 4.700229  | H | -0.092623 | -2.096649 | 2.959649  |
| C  | 1.641281  | 1.168496  | 2.788572  | H | -1.148962 | -2.825402 | 4.196028  |
| C  | 2.705758  | 3.445153  | 3.021455  | H | 4.615968  | -1.755830 | 6.815663  |
| C  | 0.166492  | 4.975377  | -5.308930 | H | 2.470676  | -2.442684 | 2.284745  |
| C  | 0.738673  | 3.780438  | -6.097999 | H | -0.921612 | -4.096518 | 6.423239  |
| C  | 0.052226  | 1.521032  | -5.174270 | H | -0.417085 | -3.122340 | 7.854300  |



|                                                         |           |           |           |   |           |           |            |
|---------------------------------------------------------|-----------|-----------|-----------|---|-----------|-----------|------------|
| H                                                       | -1.376861 | -2.364721 | 6.539185  | C | 2.283065  | 2.976507  | 4.617700   |
| H                                                       | 6.485859  | -0.323164 | 4.238969  | C | 1.304362  | 1.870627  | 6.648360   |
| H                                                       | 6.682155  | -1.224539 | 5.778315  | C | 1.803696  | 1.651458  | 7.962256   |
| H                                                       | 7.018213  | -2.026193 | 4.211204  | C | 1.024749  | 0.916823  | 8.874447   |
| H                                                       | 5.908666  | -2.632064 | 2.092984  | C | -0.235087 | 0.435389  | 8.482067   |
| H                                                       | 4.510066  | -1.941886 | 1.211579  | C | -0.743147 | 0.716721  | 7.171054   |
| H                                                       | 5.665752  | -0.872230 | 2.066399  | C | 0.036884  | 1.430740  | 6.241538   |
|                                                         |           |           |           | C | 3.330344  | 2.775606  | 6.932592   |
|                                                         |           |           |           | C | 4.554337  | 3.562599  | 6.604720   |
| Conformation 31.                                        |           |           |           |   |           |           |            |
| Multiplicity: 2                                         |           |           |           |   |           |           |            |
| Charge: 0                                               |           |           |           |   |           |           |            |
| E(B97-3c) = -5613.001675257173 Hartree                  |           |           |           |   |           |           |            |
| E(M06/def2-TZVP) = -5612.861948446687 Hartree           |           |           |           |   |           |           |            |
| E(PBE - D3(BJ)/def2-TZVP) = -5610.919969589283 Hartree  |           |           |           |   |           |           |            |
| E(PBE0 - D3(BJ)/def2-TZVP) = -5611.152113263775 Hartree |           |           |           |   |           |           |            |
| E(PBEh-3c) = -5604.804784540860 Hartree                 |           |           |           |   |           |           |            |
| E(PM6) = 197.04998 Kcal/mol                             |           |           |           |   |           |           |            |
| E(PM7) = 82.38588 Kcal/mol                              |           |           |           |   |           |           |            |
| E(@B97X-V/def2-TZVP) = -5614.557622015721 Hartree       |           |           |           |   |           |           |            |
| E(GFN1-xTB) = -265.517724803432 Hartree                 |           |           |           |   |           |           |            |
| E(GFN2-xTB) = -259.253122296361 Hartree                 |           |           |           |   |           |           |            |
| E(GFN-FF) = -33.801568872292 Hartree                    |           |           |           |   |           |           |            |
| Coordinates:                                            |           |           |           |   |           |           |            |
| Cu                                                      | 0.130463  | 0.077038  | 0.057900  | C | 0.038447  | -0.869771 | -7.153200  |
| N                                                       | -0.358028 | -1.803844 | 0.637650  | C | -2.675281 | -3.251083 | -6.855095  |
| N                                                       | -1.206353 | 0.835531  | 1.383997  | C | -3.521110 | -4.244548 | -6.133545  |
| N                                                       | 0.594545  | 1.958151  | -0.539991 | C | -0.055562 | 0.397450  | -10.778255 |
| N                                                       | 1.508623  | -0.670043 | -1.227446 | C | 1.513278  | 0.798514  | -8.328242  |
| C                                                       | 0.155862  | -2.985892 | 0.142065  | H | -0.321843 | -5.165979 | 0.500909   |
| C                                                       | -1.347596 | -2.160529 | 1.533439  | H | -2.174008 | -4.142864 | 2.236662   |
| C                                                       | -2.047568 | 0.122788  | 2.215896  | H | -3.569034 | 0.720452  | 3.776789   |
| C                                                       | -1.420011 | 2.169402  | 1.673269  | H | -2.776127 | 3.255745  | 3.120214   |
| C                                                       | 0.145663  | 3.142656  | 0.009162  | H | 0.568181  | 5.320321  | -0.423061  |
| C                                                       | 1.437312  | 2.306665  | -1.574275 | H | 2.146207  | 4.286690  | -2.404786  |
| C                                                       | 2.237152  | 0.031410  | -2.162469 | H | 3.715889  | -0.578489 | -3.765187  |
| C                                                       | 1.813916  | -2.002524 | -1.425823 | H | 3.235718  | -3.086568 | -2.811875  |
| C                                                       | -0.531036 | -4.116920 | 0.734504  | H | -2.947365 | -3.341488 | -4.421899  |
| C                                                       | -1.459636 | -3.604225 | 1.604831  | H | -5.424064 | -3.446059 | 6.011111   |
| C                                                       | -2.816535 | 1.031058  | 3.044890  | H | -6.390348 | -2.529227 | 3.879435   |
| C                                                       | -2.421039 | 2.302615  | 2.713590  | H | -4.853820 | -1.532352 | 2.158689   |
| C                                                       | 0.742309  | 4.269929  | -0.679477 | H | 0.035464  | 6.628265  | 4.205247   |
| C                                                       | 1.527117  | 3.749912  | -1.677891 | H | -1.605027 | 8.200426  | 3.126285   |
| C                                                       | 3.053141  | -0.875023 | -2.946708 | H | -2.880740 | 7.486582  | 1.084274   |
| C                                                       | 2.808339  | -2.136518 | -2.474081 | H | -2.503790 | 5.190858  | 0.128437   |
| C                                                       | -2.139560 | -1.279745 | 2.297911  | H | 2.138522  | 3.533317  | -6.571885  |
| C                                                       | -0.780737 | 3.266300  | 1.061912  | H | 4.633792  | 3.661804  | -6.659016  |
| C                                                       | 2.167460  | 1.418496  | -2.385349 | H | 6.000316  | 2.671281  | -4.790763  |
| C                                                       | 1.178949  | -3.103845 | -0.819445 | H | 4.840034  | 1.628351  | -2.831673  |
| O                                                       | -0.801050 | -3.021974 | 6.860105  | H | 0.845291  | -6.387725 | -4.132544  |
| O                                                       | 1.541378  | 5.227627  | 5.118347  | H | 2.218028  | -8.027073 | -2.810443  |
| O                                                       | 0.217441  | 0.339519  | -4.147884 | H | 3.125047  | -7.385523 | -0.556617  |
| O                                                       | -0.359729 | -4.928083 | -5.309963 | H | 2.647950  | -5.095089 | 0.360300   |
| N                                                       | -1.135072 | -2.296574 | 4.702912  | H | -0.634479 | -1.918701 | 3.895860   |
| N                                                       | 0.575919  | 4.121524  | 3.324996  | H | 0.587879  | 3.220751  | 2.837575   |
| N                                                       | 2.314868  | 2.567250  | 5.995803  | H | 0.228207  | 3.384568  | -4.990787  |
| N                                                       | 3.056833  | 2.232583  | 8.104391  | H | 0.120887  | -2.992053 | -2.833357  |
| N                                                       | 0.667933  | 2.530934  | -4.643208 | H | 2.986193  | -2.266253 | 6.703048   |
| N                                                       | 0.209938  | -3.889435 | -3.319753 | H | 1.626434  | -1.196026 | 7.190378   |
| N                                                       | -1.628119 | -2.575465 | -6.223865 | H | 1.583240  | -2.930449 | 7.618553   |
| N                                                       | -2.808380 | -2.912795 | -8.125434 | H | 2.648647  | -1.410192 | 4.364518   |
| C                                                       | -3.062554 | -1.874202 | 3.315428  | H | 1.173919  | -1.725670 | 3.432617   |
| C                                                       | -2.521730 | -2.386718 | 4.530988  | H | 1.168897  | -0.473951 | 4.739199   |
| C                                                       | -3.384672 | -2.954974 | 5.493722  | H | 2.690237  | -3.969709 | 4.833407   |
| C                                                       | -4.763613 | -3.001332 | 5.251219  | H | 1.338567  | -4.713887 | 5.754280   |
| C                                                       | -5.306432 | -2.490513 | 4.061928  | H | 1.087032  | -4.191070 | 4.052679   |
| C                                                       | -4.450349 | -1.931330 | 3.101687  | H | 1.929274  | 2.128151  | 3.991129   |
| C                                                       | -1.041393 | 4.633012  | 1.615421  | H | 3.314225  | 3.216223  | 4.289438   |
| C                                                       | -0.323336 | 5.048191  | 2.773398  | H | 1.411869  | 0.715955  | 9.884593   |
| C                                                       | -0.530473 | 6.334384  | 3.312794  | H | -0.366498 | 1.652508  | 5.240388   |
| C                                                       | -1.447132 | 7.198672  | 2.698871  | H | 5.174407  | 3.634414  | 7.515381   |
| C                                                       | -2.161327 | 6.802105  | 1.557355  | H | 5.162145  | 3.086038  | 5.805859   |
| C                                                       | -1.953395 | 5.521296  | 1.022430  | H | 4.285165  | 4.584471  | 6.266020   |
| C                                                       | 2.847114  | 1.983199  | -3.585055 | H | -2.060289 | 0.024137  | 9.610333   |
| C                                                       | 2.083770  | 2.522748  | -4.656282 | H | -1.209446 | -1.423105 | 9.004917   |
| C                                                       | 2.742542  | 3.126186  | -5.746859 | H | -0.548636 | -0.516930 | 10.406442  |
| C                                                       | 4.139834  | 3.187945  | -5.797817 | H | -2.270448 | -0.819854 | 6.972224   |
| C                                                       | 4.901594  | 2.632100  | -4.758379 | H | -2.902623 | 0.784725  | 7.402810   |
| C                                                       | 4.253415  | 2.038946  | -3.667065 | H | -2.342906 | 0.467547  | 5.730276   |
| C                                                       | 1.493776  | -4.466206 | -1.352884 | H | -3.161303 | 2.937238  | -5.532252  |
| C                                                       | 0.979657  | -4.840360 | -2.630326 | H | -1.593376 | 3.764139  | -5.496258  |
| C                                                       | 1.248457  | -6.125458 | -3.146952 | H | -1.800771 | 2.275906  | -6.494084  |
| C                                                       | 2.015137  | -7.027443 | -2.397130 | H | -3.601178 | 0.837587  | -4.280022  |
| C                                                       | 2.522181  | -6.672236 | -1.137555 | H | -2.376532 | 0.033234  | -5.319096  |
| C                                                       | 2.257007  | -5.393902 | -0.624113 | H | -0.085752 | -2.253076 | -3.533348  |
| C                                                       | -0.346681 | -2.623407 | 5.788515  | H | -2.996372 | 2.900658  | -2.913820  |
| C                                                       | 1.178152  | -2.535181 | 5.510493  | H | -1.673368 | 1.966454  | -2.134992  |
| C                                                       | 1.886907  | -2.211921 | 6.834536  | H | -1.312111 | 3.530179  | -2.915923  |
| C                                                       | 1.545277  | -1.476100 | 4.451146  | H | -2.122049 | -2.722425 | -4.196452  |
| C                                                       | 1.594822  | -3.937449 | 5.006591  | H | -0.658530 | -1.781950 | -4.557724  |
| C                                                       | 1.425974  | 4.242067  | 4.400364  | H | -2.072106 | -1.436319 | -10.452985 |
|                                                         |           |           |           | H | 0.627285  | -0.711325 | -6.238271  |

|   |           |           |            |   |           |           |           |
|---|-----------|-----------|------------|---|-----------|-----------|-----------|
| H | -4.037504 | -3.796516 | -5.257598  | C | -2.713231 | -2.021961 | 3.200999  |
| H | -4.285710 | -4.624637 | -6.833528  | C | -1.042204 | -2.916968 | -4.040539 |
| H | -2.904287 | -5.091287 | -5.769179  | C | -0.511247 | -4.361398 | -4.212135 |
| H | 0.981806  | 0.181794  | -11.113718 | C | 1.877878  | -5.202799 | -4.248343 |
| H | -0.736970 | 0.141113  | -11.611963 | C | 2.891820  | -5.232074 | -3.252240 |
| H | -0.108797 | 1.497170  | -10.625692 | C | 4.190666  | -5.639168 | -3.603913 |
| H | 1.196288  | 1.830474  | -8.596017  | C | 4.464197  | -6.018457 | -4.927457 |
| H | 2.000948  | 0.841943  | -7.335671  | C | 3.422390  | -6.008344 | -5.913015 |
| H | 2.288336  | 0.515079  | -9.072534  | C | 2.121376  | -5.603078 | -5.567895 |

Conformation 32.

Multiplicity: 2

Charge: 0

E(B97-3c) = -5613.012411494140 Hartree  
 E(M06/def2-TZVP) = -5612.873146275971 Hartree  
 E(PBE - D3(BJ)/def2-TZVP) = -5610.925860426999 Hartree  
 E(PBE0 - D3(BJ)/def2-TZVP) = -5611.159603419211 Hartree  
 E(PBEh-3c) = -5604.808512107461 Hartree  
 E(PM6) = 209.68398 Kcal/mol  
 E(PM7) = 71.95218 Kcal/mol  
 E( $\omega$ B97X-V/def2-TZVP) = -5614.570210628630 Hartree  
 E(GFN1-xTB) = -265.536137349420 Hartree  
 E(GFN2-xTB) = -259.265178967879 Hartree  
 E(GFN-FF) = -33.811077111268 Hartree

Coordinates:

|    |           |           |           |   |           |           |           |
|----|-----------|-----------|-----------|---|-----------|-----------|-----------|
| Cu | -0.004864 | 1.349080  | 0.403652  | C | 2.566692  | 2.898641  | 4.672375  |
| N  | -0.203351 | 1.130173  | 2.404906  | C | 2.658917  | 2.510205  | 6.108373  |
| N  | 1.297212  | -0.209530 | 0.339172  | C | 2.881937  | 3.311326  | -1.267343 |
| N  | 0.160037  | 1.548063  | -1.601024 | H | 1.294738  | 5.665870  | -0.516074 |
| N  | -1.427627 | 2.805019  | 0.436943  | C | -1.490214 | 1.698663  | 5.462174  |
| C  | -1.066606 | 1.809337  | 3.240751  | H | 0.484805  | -0.194804 | 5.417442  |
| C  | 0.504660  | 0.260614  | 3.204649  | H | 3.136054  | -2.709022 | 1.638046  |
| C  | 1.786564  | -0.907150 | 1.424193  | H | 3.088991  | -2.689303 | -1.080678 |
| C  | 1.806012  | -0.834732 | -0.782135 | H | 1.387479  | 0.891251  | -4.663308 |
| C  | 0.909891  | 0.768049  | -2.450868 | H | -0.357226 | 2.984331  | -4.598690 |
| C  | -0.464521 | 2.482938  | -2.395815 | H | -3.482193 | 5.103166  | -0.907758 |
| C  | -1.919447 | 3.490546  | -0.652919 | H | -3.709026 | 4.861625  | 1.808391  |
| C  | -2.119289 | 3.275977  | 1.534427  | H | 1.229715  | -4.407214 | 5.579974  |
| C  | -0.908262 | 1.340433  | 4.605940  | H | 3.490154  | -3.933969 | 6.574197  |
| C  | 0.078548  | 0.388299  | 4.584408  | H | 4.814741  | -1.940429 | 5.816081  |
| C  | 2.631799  | -1.997229 | 0.975757  | H | 3.841565  | -0.405108 | 4.048004  |
| C  | 2.625863  | -1.969358 | -0.395943 | H | 1.038956  | -2.781257 | -6.112167 |
| C  | 0.845012  | 1.295409  | -3.802601 | H | 3.493244  | -2.885825 | -6.532010 |
| C  | -0.020180 | 2.355611  | -3.769025 | H | 5.093908  | -1.926657 | -4.843325 |
| C  | -2.945377 | 4.423798  | -0.236210 | H | 4.189508  | -0.796575 | -2.794274 |
| C  | -3.056808 | 4.305088  | 1.127600  | H | -5.337173 | 3.108292  | -4.603756 |
| C  | 1.460591  | -0.677885 | 2.772912  | H | -4.774581 | 5.202485  | -5.875515 |
| C  | 1.597129  | -0.413909 | -2.109087 | H | -2.659445 | 6.447968  | -5.349129 |
| C  | -1.500469 | 3.336653  | -1.986164 | H | -1.130709 | 5.605908  | -3.548101 |
| C  | -1.968164 | 2.822791  | 2.860117  | H | -2.415745 | 5.711696  | 6.525071  |
| O  | -0.924530 | -4.551480 | 4.919844  | H | -4.892894 | 5.318912  | 6.670190  |
| O  | -2.260147 | -2.772449 | -3.970041 | H | -6.015813 | 3.747147  | 5.060748  |
| O  | -2.354474 | 0.568037  | -3.337433 | H | -4.639435 | 2.589122  | 3.305830  |
| O  | -0.249586 | 6.063360  | 6.413971  | H | -0.161235 | -2.215069 | 2.915854  |
| N  | 0.046371  | -2.895102 | 3.651675  | H | -0.670114 | -0.969816 | -3.702253 |
| N  | -0.175762 | -1.849751 | -3.935101 | H | -4.687466 | 2.184747  | -1.924138 |
| N  | 0.751952  | -4.705444 | -3.600440 | H | -0.307979 | 3.959856  | 4.025354  |
| N  | 2.381618  | -4.803342 | -2.036500 | H | -4.318691 | -4.279557 | 3.153604  |
| N  | -3.937759 | 2.048710  | -2.604366 | H | -3.090179 | -5.451604 | 3.756816  |
| N  | -0.759098 | 4.541704  | 4.740648  | H | -3.610907 | -4.104811 | 4.799353  |
| N  | 1.967433  | 4.098292  | 4.263012  | H | -2.908546 | -3.845086 | 1.094559  |
| N  | 2.995340  | 2.174181  | 3.654756  | H | -1.219803 | -3.281712 | 1.235547  |
| C  | 2.052638  | -1.576540 | 3.811672  | H | -1.632515 | -4.974953 | 1.655482  |
| C  | 1.301288  | -2.704442 | 4.248988  | H | -3.673414 | -1.897746 | 2.658178  |
| C  | 1.827884  | -3.550459 | 5.247585  | H | -2.861265 | -1.667051 | 4.240523  |
| C  | 3.086998  | -3.267642 | 5.796114  | H | -1.983705 | -1.340502 | 2.715001  |
| C  | 3.830801  | -2.154352 | 5.372548  | H | -1.337115 | -4.988835 | -3.819076 |
| C  | 3.307811  | -1.308628 | 4.381042  | H | -0.443696 | -4.582779 | -5.295865 |
| C  | 2.122679  | -1.206309 | -3.258660 | H | 4.982861  | -5.653101 | -2.840239 |
| C  | 1.224635  | -1.815826 | -4.184544 | H | 1.330073  | -5.594437 | -6.334253 |
| C  | 1.739441  | -2.372542 | -5.370438 | H | 0.585773  | -4.141846 | -0.248789 |
| C  | 3.118698  | -2.418391 | -5.610140 | H | -0.068647 | -2.922281 | -1.384188 |
| C  | 4.008809  | -1.884638 | -4.669819 | H | -0.824625 | -4.540363 | -1.300798 |
| C  | 3.504968  | -1.266552 | -3.516131 | H | 5.874593  | -7.487318 | -5.710027 |
| C  | -2.369744 | 3.900024  | -3.061707 | H | 6.279675  | -5.806535 | -6.119757 |
| C  | -3.565944 | 3.195520  | -3.368913 | H | 6.547126  | -6.404297 | -4.452874 |
| C  | -4.419975 | 3.671913  | -4.377313 | H | 4.513243  | -5.801144 | -7.789863 |
| C  | -4.099205 | 4.838763  | -5.086686 | H | 4.099736  | -7.477120 | -7.375348 |
| C  | -2.915655 | 5.532980  | -4.794268 | H | 2.824553  | -6.370407 | -7.971482 |
| C  | -2.056965 | 5.062060  | -3.788623 | H | -4.768059 | -0.224230 | 0.456055  |
| C  | -2.777821 | 3.486209  | 3.927312  | H | -3.913094 | 1.322091  | 0.175880  |
| C  | -2.149750 | 4.368731  | 4.852626  | H | -5.486328 | 0.966121  | -0.643631 |
| C  | -2.921565 | 5.027491  | 5.833613  | H | -4.996543 | -1.941092 | -1.455819 |
| C  | -4.302562 | 4.800613  | 5.899359  | H | -5.528745 | -0.698344 | -2.636699 |
| C  | -4.932130 | 3.926060  | 5.000557  | H | -4.063400 | -1.697083 | -2.975003 |
| C  | -4.165574 | 3.278233  | 4.021239  | H | -2.811926 | -1.620981 | -0.152944 |
| C  | -0.997613 | -3.721110 | 4.018362  | H | -1.918968 | -1.329016 | -1.683904 |
| C  | -2.280887 | -3.505223 | 3.164777  | H | -1.846413 | -0.121104 | -0.360527 |
| C  | -3.391204 | -4.386824 | 3.751407  | H | 1.848625  | 6.158061  | 4.617700  |
| C  | -1.987532 | -3.926133 | 1.708450  | H | 2.132246  | 5.169419  | 6.062494  |

|   |          |          |           |   |           |           |           |
|---|----------|----------|-----------|---|-----------|-----------|-----------|
| H | 3.458909 | 1.703553 | 0.874832  | C | -6.381267 | 4.682524  | 0.403932  |
| H | 1.002429 | 5.925247 | 2.185958  | C | -4.297247 | 3.314208  | 0.049768  |
| H | 1.658328 | 2.502767 | 6.588308  | C | -4.420870 | 4.956129  | 1.968626  |
| H | 3.086691 | 1.493699 | 6.169620  | C | 3.983376  | -1.831078 | 3.085798  |
| H | 3.305272 | 3.200503 | 6.691281  | C | 3.702619  | -2.659739 | 1.824259  |
| H | 3.644128 | 4.048168 | -1.602766 | C | 2.722103  | -4.836566 | 1.122605  |
| H | 3.301374 | 2.298999 | -1.418718 | C | 1.636002  | -5.638695 | 1.568416  |
| H | 2.016510 | 3.419744 | -1.949202 | C | 1.310136  | -6.809903 | 0.860368  |
| H | 0.586956 | 5.148750 | -1.198907 | C | 2.035731  | -7.146635 | -0.294935 |
| H | 0.765040 | 6.532152 | -0.075671 | C | 3.104263  | -6.304159 | -0.749108 |
| H | 2.121076 | 6.054070 | -1.148257 | C | 3.453410  | -5.145926 | -0.030885 |

Conformation 33.

Multiplicity: 2

Charge: 0

E(B97-3c) = -5613.030013708073 Hartree

E(M06/def2-TZVP) = -5612.885498672970 Hartree

E(PBE - D3(BJ)/def2-TZVP) = -5610.945197813673 Hartree

E(PBE0 - D3(BJ)/def2-TZVP) = -5611.179011379139 Hartree

E(PBEh-3c) = -5604.827598142869 Hartree

E(PM6) = 171.04173 Kcal/mol

E(PM7) = 51.00600 Kcal/mol

E( $\omega$ B97X-V/def2-TZVP) = -5614.584317043254 Hartree

E(GFN1-xTB) = -265.551105162363 Hartree

E(GFN2-xTB) = -259.272104016133 Hartree

E(GFN-FF) = -33.823526285600 Hartree

Coordinates:

|    |           |           |           |   |           |           |           |
|----|-----------|-----------|-----------|---|-----------|-----------|-----------|
| Cu | -0.465208 | 0.669407  | 0.054689  | C | 0.015453  | -2.627208 | 0.104905  |
| N  | -2.298700 | -0.147250 | -0.166549 | C | -1.073527 | -2.937464 | 1.070149  |
| N  | -0.730723 | 0.698676  | 2.062061  | C | 4.764751  | -0.507248 | -2.837254 |
| N  | 1.234752  | 1.733250  | 0.260948  | C | 4.129934  | -2.995689 | -4.268445 |
| N  | -0.305913 | 0.837166  | -1.963209 | H | -4.748598 | -1.739371 | -1.828745 |
| C  | -2.817030 | -0.669557 | -1.329869 | H | -5.283262 | -1.333772 | 0.826139  |
| C  | -3.231748 | -0.378756 | 0.820388  | H | -2.325866 | 0.180757  | 4.975135  |
| C  | -1.857398 | 0.338020  | 2.765583  | H | 0.300239  | 0.889378  | 5.255879  |
| C  | 0.246611  | 0.967542  | 2.992176  | H | 3.968455  | 2.791586  | 1.905232  |
| C  | 1.960434  | 1.863643  | 1.424354  | H | 3.948462  | 3.430060  | -0.757962 |
| C  | 1.964333  | 2.341222  | -0.732710 | H | 0.942965  | 1.937032  | -4.885023 |
| C  | 0.598030  | 1.598818  | -2.671350 | H | -1.055761 | 0.095228  | -5.155762 |
| C  | -1.076675 | 0.176280  | -2.892588 | H | -7.132745 | 1.336057  | 3.974464  |
| C  | -4.120239 | -1.256334 | -1.072440 | H | -7.369860 | -0.713402 | 5.417253  |
| C  | -4.392008 | -1.046089 | 0.257730  | H | -5.607570 | -2.502751 | 5.368337  |
| C  | -1.592709 | 0.402012  | 4.192318  | H | -3.607323 | -2.226559 | 3.868686  |
| C  | -0.272396 | 0.753327  | 4.332278  | H | 5.000119  | -0.415682 | 5.222013  |
| C  | 3.203869  | 2.561831  | 1.154780  | H | 5.022977  | 1.503035  | 6.840736  |
| C  | 3.191393  | 2.887620  | -0.181166 | H | 3.449041  | 3.436413  | 6.530543  |
| C  | 0.380183  | 1.425316  | -4.097579 | H | 1.837425  | 3.419682  | 4.598880  |
| C  | -0.622794 | 0.498816  | -4.234298 | H | 2.792023  | 6.724541  | -3.325750 |
| C  | -3.068051 | -0.113734 | 2.197303  | H | 4.420971  | 5.935812  | -5.074849 |
| C  | 1.539025  | 1.456065  | 2.707099  | H | 4.749055  | 3.477319  | -5.474950 |
| C  | 1.631878  | 2.375566  | -2.108429 | H | 3.456452  | 1.818994  | -4.099684 |
| C  | -2.218951 | -0.601677 | -2.608456 | H | -2.929992 | -4.684645 | -4.758602 |
| O  | -6.911795 | 3.115907  | 2.656179  | H | -4.482151 | -3.662696 | -6.454950 |
| O  | 4.679660  | -2.253173 | 4.003224  | H | -4.976912 | -1.201667 | -6.389668 |
| O  | 1.594200  | 7.370835  | -1.548809 | H | -3.925690 | 0.226375  | -4.608195 |
| O  | -1.646132 | -5.598714 | -3.135228 | H | -4.188493 | 1.767225  | 1.752322  |
| N  | -5.050459 | 1.810352  | 2.300747  | H | 2.766718  | -0.410695 | 2.249307  |
| N  | 3.400304  | -0.583852 | 3.038230  | H | 0.774702  | 4.317562  | -1.361772 |
| N  | 2.777665  | -3.766656 | 2.009579  | H | -1.254142 | -2.585835 | -2.195135 |
| N  | 1.039132  | -5.053766 | 2.673943  | H | -5.994956 | 5.524081  | -0.205374 |
| N  | 1.278567  | 5.101884  | -1.780635 | H | -6.936568 | 3.994999  | -0.265513 |
| N  | -1.671009 | -3.305790 | -2.794241 | H | -7.096727 | 5.073056  | 1.151199  |
| N  | 0.341286  | -3.481313 | -0.946103 | H | -3.967862 | 4.086045  | -0.674774 |
| N  | 0.805137  | -1.553683 | 0.135275  | H | -3.365683 | 2.886189  | 0.479647  |
| C  | -4.247431 | -0.314175 | 3.095098  | H | -4.811458 | 2.514764  | -0.521671 |
| C  | -5.251681 | 0.696906  | 3.127525  | H | -3.997477 | 5.761023  | 1.332620  |
| C  | -6.374733 | 0.543744  | 3.968283  | H | -5.074663 | 5.423512  | 2.731147  |
| C  | -6.490270 | -0.603654 | 4.764707  | H | -3.581563 | 4.455446  | 2.494369  |
| C  | -5.506231 | -1.604761 | 4.741342  | H | 3.352148  | -2.015637 | 0.990582  |
| C  | -4.389308 | -1.452687 | 3.905522  | H | 4.680772  | -3.088229 | 1.526699  |
| C  | 2.523481  | 1.523094  | 3.830018  | H | 0.479286  | -7.443995 | 1.205491  |
| C  | 3.436363  | 0.443380  | 3.998180  | H | 4.257857  | -4.493063 | -0.401567 |
| C  | 4.327301  | 0.440036  | 5.092652  | H | 0.511728  | -3.397532 | 4.546212  |
| C  | 4.322320  | 1.514681  | 5.992163  | H | 2.210786  | -2.826382 | 4.704724  |
| C  | 3.442767  | 2.594889  | 5.822279  | H | 1.086448  | -1.985965 | 3.593764  |
| C  | 2.545522  | 2.589731  | 4.743505  | H | 1.303551  | -8.124464 | -2.103340 |
| C  | 2.402996  | 3.324126  | -2.966103 | H | 2.533204  | -9.059643 | -1.221504 |
| C  | 2.213164  | 4.724439  | -2.754711 | H | 0.863967  | -8.951540 | -0.580588 |
| C  | 2.948170  | 5.656069  | -3.517577 | H | 4.366875  | -7.627180 | -1.938331 |
| C  | 3.852464  | 5.199828  | -4.486091 | H | 3.165259  | -6.728697 | -2.887438 |
| C  | 4.036615  | 3.826824  | -4.713186 | H | 4.609389  | -5.879438 | -2.255067 |
| C  | 3.310805  | 2.898847  | -3.951467 | H | 0.425216  | 6.273463  | 2.212208  |
| C  | -2.842880 | -1.408843 | -3.704063 | H | 1.663852  | 5.344590  | 1.300356  |
| C  | -2.559597 | -2.804398 | -3.757777 | H | 1.698297  | 7.141328  | 1.283131  |
| C  | -3.156615 | -3.611493 | -4.747807 | H | -1.324806 | 7.638772  | 0.977570  |
| C  | -4.019727 | -3.027043 | -5.684636 | H | -0.093292 | 8.445721  | -0.065568 |
| C  | -4.297611 | -1.651559 | -5.650737 | H | -1.456476 | 7.557040  | -0.812002 |
| C  | -3.708962 | -0.851358 | -4.659242 | H | -1.510410 | 5.111428  | 0.929799  |
| C  | -5.839946 | 2.921383  | 2.088523  | H | -1.429714 | 4.958611  | -0.847042 |
| C  | -5.221823 | 3.955466  | 1.104327  | H | -0.260114 | 4.084660  | 0.210846  |

|                                                            |           |           |           |   |           |           |           |
|------------------------------------------------------------|-----------|-----------|-----------|---|-----------|-----------|-----------|
| H                                                          | -0.868558 | -5.123512 | -0.473610 | C | 0.023493  | -4.333080 | 2.902556  |
| H                                                          | 0.451437  | -5.473381 | -1.592132 | C | -1.446187 | -4.484187 | 3.373902  |
| H                                                          | 3.039944  | 0.009106  | -0.795799 | C | -2.102319 | -5.579711 | 2.519686  |
| H                                                          | 1.948757  | -4.277360 | -3.242286 | C | -2.129725 | -3.122431 | 3.106977  |
| H                                                          | -0.842580 | -3.865585 | 1.636313  | C | -1.566584 | -4.843930 | 4.866406  |
| H                                                          | -1.155496 | -2.104335 | 1.787676  | C | -0.165965 | 3.773262  | 0.917024  |
| H                                                          | -2.053802 | -3.062218 | 0.565752  | C | 0.860351  | 3.728583  | 2.065175  |
| H                                                          | 4.707709  | -0.226891 | -3.910448 | C | 0.832121  | 6.215740  | 2.475010  |
| H                                                          | 4.830838  | 0.426347  | -2.246780 | C | 0.726198  | 7.003080  | 3.655255  |
| H                                                          | 5.722794  | -1.057026 | -2.715447 | C | 0.707686  | 8.405219  | 3.544794  |
| H                                                          | 5.192214  | -3.123592 | -3.969702 | C | 0.792403  | 9.001344  | 2.276402  |
| H                                                          | 3.779064  | -3.959066 | -4.685088 | C | 0.897877  | 8.189287  | 1.098952  |
| H                                                          | 4.126785  | -2.249670 | -5.091621 | C | 0.919444  | 6.786576  | 1.197089  |
| Conformation 34.                                           |           |           |           |   |           |           |           |
| Multiplicity: 2                                            |           |           |           |   |           |           |           |
| Charge: 0                                                  |           |           |           |   |           |           |           |
| E(B97-3c) = -5612.992167069223 Hartree                     |           |           |           |   |           |           |           |
| E(M06/def2-TZVP) = -5612.852003395962 Hartree              |           |           |           |   |           |           |           |
| E(PBE - D3(BJ)/def2-TZVP) = -5610.904860312198 Hartree     |           |           |           |   |           |           |           |
| E(PBE0 - D3(BJ)/def2-TZVP) = -5611.138181448125 Hartree    |           |           |           |   |           |           |           |
| E(PBEh-3c) = -5604.793236070004 Hartree                    |           |           |           |   |           |           |           |
| E(PM6) = 205.14573 Kcal/mol                                |           |           |           |   |           |           |           |
| E(PM7) = 88.65215 Kcal/mol                                 |           |           |           |   |           |           |           |
| E( $\omega$ B97X-V/def2-TZVP) = -5614.549365030531 Hartree |           |           |           |   |           |           |           |
| E(GFN1-xTB) = -265.512834951264 Hartree                    |           |           |           |   |           |           |           |
| E(GFN2-xTB) = -259.246268615672 Hartree                    |           |           |           |   |           |           |           |
| E(GFN-FF) = -33.782771217145 Hartree                       |           |           |           |   |           |           |           |
| Coordinates:                                               |           |           |           |   |           |           |           |
| Cu                                                         | -0.958062 | -0.782300 | -0.525896 | C | 6.118950  | -0.727582 | -3.409504 |
| N                                                          | 0.645183  | -1.993010 | -0.755282 | C | 3.374956  | 0.416796  | -1.331300 |
| N                                                          | -0.435994 | -0.463933 | 1.410389  | C | 2.080615  | 1.104501  | -1.055810 |
| N                                                          | -2.558504 | 0.440629  | -0.293050 | C | 8.378726  | -2.838546 | -1.134205 |
| N                                                          | -1.483387 | -1.076192 | -2.462910 | C | 8.245243  | -1.974009 | -3.932636 |
| C                                                          | 1.063471  | -2.586454 | -1.929849 | H | 2.781327  | -3.961227 | -2.457247 |
| C                                                          | 1.531141  | -2.401950 | 0.218130  | H | 3.325276  | -3.774802 | 0.213930  |
| C                                                          | 0.611734  | -1.054597 | 2.086142  | H | 1.472221  | -0.782431 | 4.157965  |
| C                                                          | -0.991389 | 0.458143  | 2.275378  | H | -0.500642 | 1.081153  | 4.396780  |
| C                                                          | -2.835535 | 1.230152  | 0.803170  | H | -4.494992 | 2.689761  | 1.289212  |
| C                                                          | -3.550637 | 0.692556  | -1.216868 | H | -5.371493 | 2.032905  | -1.216364 |
| C                                                          | -2.646880 | -0.664852 | -3.085480 | H | -3.530108 | -1.028905 | -5.132432 |
| C                                                          | -0.788941 | -1.812495 | -3.398097 | H | -1.188126 | -2.374049 | -5.552409 |
| C                                                          | 2.251644  | -3.385838 | -1.690425 | H | 2.950022  | -4.423408 | 5.336075  |
| C                                                          | 2.524361  | -3.291501 | -0.352530 | H | 5.314794  | -3.651689 | 5.054097  |
| C                                                          | 0.715225  | -0.498663 | 3.419546  | H | 5.919939  | -2.167563 | 3.112166  |
| C                                                          | -0.271913 | 0.448767  | 3.534045  | H | 4.114995  | -1.432007 | 1.500328  |
| C                                                          | -4.042670 | 1.995745  | 0.571403  | H | -2.042224 | 5.828143  | 3.103299  |
| C                                                          | -4.492844 | 1.653858  | -0.682700 | H | -3.070225 | 5.429433  | 5.360711  |
| C                                                          | -2.692357 | -1.170422 | -4.443033 | H | -3.684779 | 3.092447  | 6.053250  |
| C                                                          | -1.522011 | -1.852370 | -4.649755 | H | -3.249466 | 1.172785  | 4.499601  |
| C                                                          | 1.515668  | -2.000553 | 1.564844  | H | -8.211714 | -0.422820 | -3.222158 |
| C                                                          | -2.083212 | 1.298404  | 1.991248  | H | -8.239128 | 1.149555  | -5.192345 |
| C                                                          | -3.639301 | 0.146377  | -2.513655 | H | -6.102545 | 2.226711  | -5.948348 |
| C                                                          | 0.429650  | -2.486663 | -3.182201 | H | -3.965235 | 1.761695  | -4.722844 |
| O                                                          | 0.382206  | -4.621910 | 1.766389  | H | 3.409619  | -2.156093 | -6.762459 |
| O                                                          | 0.182956  | 3.667974  | -0.256899 | H | 2.759848  | -4.409856 | -7.669852 |
| O                                                          | -5.154050 | -2.798181 | -2.949874 | H | 1.059429  | -5.811571 | -6.464689 |
| O                                                          | 3.814005  | -0.047892 | -6.018348 | H | -0.011540 | -4.928790 | -4.368301 |
| N                                                          | 0.883362  | -3.771757 | 3.830793  | H | 0.562855  | -3.732412 | 4.798861  |
| N                                                          | -1.481882 | 3.975092  | 1.269186  | H | -2.111427 | 3.911047  | 0.460081  |
| N                                                          | 0.818510  | 4.896935  | 2.919841  | H | -6.162797 | -0.669627 | -0.828787 |
| N                                                          | 0.660710  | 6.184954  | 4.774835  | H | -0.962417 | -0.962417 | -3.517978 |
| N                                                          | -6.073718 | -1.081084 | -1.760227 | H | -3.192058 | -5.623774 | 2.719275  |
| N                                                          | 2.442724  | -1.082189 | -4.466375 | H | -1.936649 | -5.375972 | 1.445687  |
| N                                                          | 3.982228  | 0.410710  | -2.591704 | H | -1.667221 | -6.575426 | 2.739252  |
| N                                                          | 4.079721  | -0.264078 | -0.439818 | H | -3.209719 | -3.184103 | 3.355449  |
| C                                                          | 2.555480  | -2.533096 | 2.492917  | H | -1.678655 | -2.314014 | 3.717269  |
| C                                                          | 2.219332  | -3.369199 | 3.590316  | H | -2.034452 | -2.829385 | 2.044076  |
| C                                                          | 3.222398  | -3.763308 | 4.498055  | H | -2.630819 | -5.018526 | 5.124952  |
| C                                                          | 4.546205  | -3.336498 | 4.332225  | H | -1.005566 | -5.767593 | 5.116378  |
| C                                                          | 4.884086  | -2.515810 | 3.244556  | H | -1.221131 | -4.026053 | 5.535007  |
| C                                                          | 3.893556  | -2.118183 | 2.335949  | H | 0.678787  | 2.824943  | 2.680195  |
| C                                                          | -2.395398 | 2.408627  | 2.940394  | H | 1.851141  | 3.618871  | 1.579074  |
| C                                                          | -2.064729 | 3.737561  | 2.555892  | H | 0.630764  | 9.022780  | 4.452491  |
| C                                                          | -2.321109 | 4.813237  | 3.422316  | H | 1.002062  | 6.166785  | 0.291876  |
| C                                                          | -2.894465 | 4.583255  | 4.680741  | H | 0.712570  | 4.036139  | 6.216943  |
| C                                                          | -3.228716 | 3.275847  | 5.068692  | H | -0.298274 | 3.179052  | 5.009594  |
| C                                                          | -2.983103 | 2.198483  | 4.203286  | H | 1.488216  | 3.018445  | 4.948704  |
| C                                                          | -4.884521 | 0.424696  | -3.289083 | H | 1.689912  | 10.886369 | 1.645370  |
| C                                                          | -6.096261 | -0.184554 | -2.872693 | H | -0.083171 | 10.859047 | 1.537741  |
| C                                                          | -7.291702 | 0.077186  | -3.557941 | H | 0.707275  | 10.992085 | 3.139200  |
| C                                                          | -7.298340 | 0.947102  | -4.658785 | H | 0.111138  | 9.490872  | -0.463389 |
| C                                                          | -6.102849 | 1.547047  | -5.082917 | H | 1.882898  | 9.497479  | -0.340392 |
| C                                                          | -4.903958 | 1.285651  | -4.401986 | H | 1.048526  | 8.087698  | -1.065382 |
| C                                                          | 1.103677  | -3.080196 | -4.380905 | H | -5.118267 | -2.786727 | 1.628399  |
| C                                                          | 2.090813  | -2.307342 | -5.055150 | H | -4.809141 | -1.270528 | 0.746581  |
| C                                                          | 2.674891  | -2.785523 | -6.246122 | H | -6.480057 | -1.959942 | 0.830200  |
| C                                                          | 2.297598  | -4.040824 | -6.741670 | H | -5.697749 | -4.958615 | 0.351040  |
| C                                                          | 1.346239  | -4.825357 | -6.070907 | H | -7.044878 | -4.105714 | -0.478848 |
| C                                                          | 0.751073  | -4.337652 | -4.897159 | H | -5.768930 | -4.915278 | -1.448310 |
|                                                            |           |           |           | H | -3.353246 | -4.074144 | 0.244743  |

|   |           |           |           |   |           |           |           |
|---|-----------|-----------|-----------|---|-----------|-----------|-----------|
| H | -3.381464 | -3.902702 | -1.548907 | C | -1.768643 | 4.068257  | 5.960409  |
| H | -2.982907 | -2.493528 | -0.520460 | C | -2.033055 | 2.940762  | 5.169309  |
| H | 4.284410  | 1.684814  | -4.254165 | C | -6.564624 | -1.008450 | 1.992948  |
| H | 2.598290  | 1.569030  | -3.648401 | C | -6.345424 | -1.313682 | 3.496064  |
| H | 6.293272  | -1.907278 | 0.366085  | C | -6.133683 | -2.827559 | 3.644772  |
| H | 6.061267  | -0.418486 | -4.463944 | C | -7.545339 | -0.867144 | 4.354649  |
| H | 1.259865  | 0.736030  | -1.707711 | C | -5.069668 | -0.560583 | 3.940373  |
| H | 1.790113  | 0.886016  | -0.103213 | C | -1.274724 | -0.960745 | -5.153300 |
| H | 2.123589  | 2.206405  | -1.175003 | C | -1.290972 | 0.495743  | -4.644311 |
| H | 9.364298  | -2.349955 | -1.290095 | C | 1.043393  | 0.727646  | -3.768133 |
| H | 8.290105  | -3.083641 | -0.058470 | C | 1.577674  | 1.437674  | -2.634904 |
| H | 8.415295  | -3.795911 | -1.696776 | C | 2.966883  | 1.624863  | -2.539690 |
| H | 8.302964  | -3.080736 | -4.012445 | C | 3.803967  | 1.130188  | -3.552438 |
| H | 8.056511  | -1.572829 | -4.946624 | C | 3.247747  | 0.428281  | -4.672510 |
| H | 9.254228  | -1.633681 | -3.615462 | C | 1.855260  | 0.257013  | -4.787360 |

Conformation 6.

Multiplicity: 2

Charge: 0

E(B97-3c) = -5613.008101273340 Hartree  
 E(M06/def2-TZVP) = -5612.865506457643 Hartree  
 E(PBE - D3(BJ)/def2-TZVP) = -5610.925946595728 Hartree  
 E(PBE0 - D3(BJ)/def2-TZVP) = -5611.158100151668 Hartree  
 E(PBEh-3c) = -5604.810234962992 Hartree  
 E(PM6) = 174.12711 Kcal/mol  
 E(PM7) = 73.59270 Kcal/mol  
 E( $\omega$ B97X-V/def2-TZVP) = -5614.563505922404 Hartree  
 E(GFN1-xTB) = -265.522367452833 Hartree  
 E(GFN2-xTB) = -259.255506262497 Hartree  
 E(GFN-FF) = -33.808088401167 Hartree

Coordinates:

|    |           |           |           |   |           |           |           |
|----|-----------|-----------|-----------|---|-----------|-----------|-----------|
| Cu | -1.951721 | -1.104665 | 0.916956  | C | 2.838696  | 4.871036  | -0.877376 |
| N  | -2.995400 | 0.556304  | 1.380629  | C | 1.433414  | 5.332285  | -1.058445 |
| N  | -3.153684 | -1.396874 | -0.676268 | C | 8.682790  | 3.737522  | -1.225744 |
| N  | -0.896758 | -2.755224 | 0.438086  | C | 7.746113  | 1.836579  | 0.805336  |
| N  | -0.751932 | -0.798893 | 2.509193  | H | -3.486468 | 3.557417  | 2.812602  |
| C  | -2.621682 | 1.538658  | 2.274921  | H | -5.425776 | 2.847276  | 1.022416  |
| C  | -4.174106 | 0.976125  | 0.804057  | H | -6.002912 | -1.164212 | -2.442029 |
| C  | -4.376896 | -0.802299 | -0.912103 | H | -4.233511 | -2.993028 | -3.429542 |
| C  | -2.976006 | -2.335528 | -1.668971 | H | 0.156667  | -5.262363 | -1.541209 |
| C  | -0.968399 | -3.465851 | -0.741982 | H | 1.359448  | -5.204962 | 0.903387  |
| C  | 0.069229  | -3.370489 | 1.208475  | H | 1.679296  | -1.529013 | 4.714082  |
| C  | 0.211326  | -1.656248 | 2.999302  | H | 0.553241  | 0.940835  | 5.074868  |
| C  | -0.708065 | 0.331198  | 3.300231  | H | -9.323148 | 1.386718  | 0.902248  |
| C  | -3.566164 | 2.637154  | 2.224480  | H | -9.728977 | 2.474700  | -1.313152 |
| C  | -4.544321 | 2.274870  | 1.330730  | H | -7.917611 | 2.460388  | -3.061139 |
| C  | -5.003288 | -1.408082 | -2.069541 | H | -5.700882 | 1.422955  | -2.531867 |
| C  | -4.115192 | -2.330131 | -2.565515 | H | -1.073289 | -3.417665 | -6.380733 |
| C  | -0.008529 | -4.554251 | -0.723111 | H | -1.465876 | -5.891861 | -6.475596 |
| C  | 0.596997  | -4.525831 | 0.507313  | H | -2.067748 | -7.154452 | -4.386373 |
| C  | 0.876613  | -1.054341 | 4.139890  | H | -2.269163 | -5.916684 | -2.212393 |
| C  | 0.315765  | 0.186001  | 4.317230  | H | 4.984704  | -4.481862 | 2.732354  |
| C  | -4.894505 | 0.296525  | -0.200406 | H | 4.487218  | -5.770262 | 4.833129  |
| C  | -1.895691 | -3.239033 | -1.779263 | H | 2.180872  | -5.711729 | 5.832620  |
| C  | 0.581022  | -2.894604 | 2.434735  | H | 0.382104  | -4.369958 | 4.701829  |
| C  | -1.539139 | 1.463458  | 3.174381  | H | 0.907511  | 5.322337  | 4.193570  |
| O  | -6.247736 | -1.787492 | 1.101798  | H | -0.493853 | 5.810444  | 6.219235  |
| O  | -1.377172 | -1.201355 | -6.351272 | H | -2.386195 | 4.278700  | 6.845969  |
| O  | 5.311486  | -3.598544 | 0.736934  | H | -2.857567 | 2.257553  | 5.424617  |
| O  | 2.087874  | 4.941061  | 2.370487  | H | -7.507372 | 0.752212  | 2.507261  |
| N  | -7.095868 | 0.245437  | 1.722475  | H | -1.140850 | -1.535628 | -3.196869 |
| N  | -1.207331 | -1.900420 | -4.152462 | H | 2.404518  | -2.389383 | 1.092953  |
| N  | -0.341835 | 0.804288  | -3.594392 | H | 0.288421  | 2.329729  | 2.089377  |
| N  | 0.544296  | 1.845353  | -1.793546 | H | -5.898443 | -3.077578 | 4.698656  |
| N  | 3.206566  | -2.943551 | 1.401117  | H | -7.038314 | -3.392244 | 3.343680  |
| N  | 0.577319  | 3.195803  | 2.555040  | H | -5.302147 | -3.168609 | 3.000199  |
| N  | 3.164023  | 3.856030  | 0.025515  | H | -7.391799 | -1.181671 | 5.406803  |
| N  | 3.893496  | 5.332893  | -1.526164 | H | -7.670909 | 0.236930  | 4.380446  |
| C  | -6.249810 | 0.816159  | -0.532869 | H | -8.494378 | -1.319818 | 4.002317  |
| C  | -7.287533 | 0.808321  | 0.440595  | H | -4.860197 | -0.768662 | 5.009966  |
| C  | -8.526827 | 1.409246  | 0.142378  | H | -4.190671 | -0.879334 | 3.346890  |
| C  | -8.755101 | 2.008281  | -1.102223 | H | -5.174242 | 0.536111  | 3.813717  |
| C  | -7.747060 | 1.996434  | -2.078551 | H | -1.109863 | 1.128716  | -5.537085 |
| C  | -6.510890 | 1.404700  | -1.787296 | H | -2.313224 | 0.712721  | -4.273620 |
| C  | -1.762797 | -3.995374 | -3.059236 | H | 3.400233  | 2.168507  | -1.691778 |
| C  | -1.421754 | -3.289168 | -4.249927 | H | 1.430197  | -0.259551 | -5.661360 |
| C  | -1.319285 | -3.982234 | -5.474260 | H | -1.874169 | 2.237133  | -0.891851 |
| C  | -1.548551 | -5.363650 | -5.513696 | H | -2.516846 | 2.430695  | -2.554697 |
| C  | -1.881255 | -6.071130 | -4.348551 | H | -2.541681 | 0.822686  | -1.755878 |
| C  | -1.986430 | -5.382775 | -3.131896 | H | 5.853423  | 0.394185  | -3.425545 |
| C  | 1.662650  | -3.681949 | 3.105229  | H | 5.677992  | 1.909332  | -4.339330 |
| C  | 2.978078  | -3.703409 | 2.555599  | H | 5.559594  | 1.935789  | -2.555831 |
| C  | 3.986141  | -4.466268 | 3.184748  | H | 4.758382  | 0.687523  | -6.218608 |
| C  | 3.691069  | -5.181023 | 4.352919  | H | 4.889586  | -0.841966 | -5.325625 |
| C  | 2.404857  | -5.150002 | 4.913852  | H | 3.587257  | -0.631272 | -6.538581 |
| C  | 1.400246  | -4.400262 | 4.285083  | H | 4.658970  | 0.184616  | -0.900422 |
| C  | -1.252256 | 2.651180  | 4.036760  | H | 4.051700  | -0.211160 | 0.736419  |
| C  | -0.178072 | 3.521124  | 3.691894  | H | 5.720844  | -0.670752 | 0.266929  |
| C  | 0.084103  | 4.659513  | 4.484844  | H | 5.062213  | -1.679379 | -2.595638 |
| C  | -0.710204 | 4.920482  | 5.608861  | H | 6.085001  | -2.599216 | -1.424407 |

|   |          |           |           |   |           |           |           |
|---|----------|-----------|-----------|---|-----------|-----------|-----------|
| H | 4.675302 | -3.385474 | -2.192407 | C | -5.941835 | 0.391669  | 4.324840  |
| H | 2.693988 | -1.151516 | -2.043410 | C | -5.769828 | 0.277250  | 5.710901  |
| H | 2.256896 | -2.763685 | -1.388889 | C | -4.516096 | -0.037798 | 6.257554  |
| H | 2.040150 | -1.272928 | -0.406369 | C | -3.419180 | -0.230621 | 5.404435  |
| H | 2.766561 | 2.192669  | 1.206266  | C | -0.884941 | -3.691224 | -4.023837 |
| H | 1.426758 | 2.687244  | 0.143210  | C | -0.902900 | -2.266545 | -4.635661 |
| H | 6.668325 | 5.336984  | -2.186420 | C | -0.088213 | -2.292271 | -5.935404 |
| H | 5.085142 | 2.067780  | 1.327894  | C | -0.275059 | -1.259593 | -3.654368 |
| H | 1.040479 | 5.789205  | -0.126195 | C | -2.366298 | -1.873118 | -4.931981 |
| H | 1.415362 | 6.088515  | -1.862730 | C | 3.536947  | 0.872174  | -4.495350 |
| H | 0.770197 | 4.486052  | -1.337287 | C | 2.325825  | 1.831816  | -4.513534 |
| H | 9.004488 | 2.755819  | -1.635371 | C | 3.384484  | 3.718323  | -3.242405 |
| H | 8.879524 | 4.505077  | -1.998441 | C | 3.022829  | 4.440613  | -2.074454 |
| H | 9.351311 | 3.947439  | -0.363461 | C | 3.873118  | 5.457020  | -1.603130 |
| H | 8.586215 | 2.361327  | 1.308276  | C | 5.060252  | 5.738557  | -2.297982 |
| H | 7.248008 | 1.198107  | 1.560049  | C | 5.404668  | 5.000949  | -3.479292 |
| H | 8.208119 | 1.164913  | 0.050009  | C | 4.560978  | 3.982014  | -3.956649 |

Conformation 8.

Multiplicity: 2

Charge: 0

E(B97-3c) = -5613.025490200966 Hartree

E(M06/def2-TZVP) = -5612.885267637605 Hartree

E(PBE - D3(BJ)/def2-TZVP) = -5610.941511635044 Hartree

E(PBE0 - D3(BJ)/def2-TZVP) = -5611.174233123637 Hartree

E(PBEh-3c) = -5604.827478043128 Hartree

E(PM6) = 189.76412 Kcal/mol

E(PM7) = 60.34417 Kcal/mol

E( $\omega$ B97X-V/def2-TZVP) = -5614.580917187273 Hartree

E(GFN1-xTB) = -265.543211639934 Hartree

E(GFN2-xTB) = -259.274736636298 Hartree

E(GFN-FF) = -33.831225456046 Hartree

Coordinates:

|    |           |           |           |   |           |           |           |
|----|-----------|-----------|-----------|---|-----------|-----------|-----------|
| Cu | 0.399218  | -0.512176 | 1.051048  | C | -3.562894 | -0.610092 | -1.032381 |
| N  | -1.182084 | -1.714729 | 1.482698  | C | -2.574427 | 0.503630  | -0.959244 |
| N  | 1.141866  | -1.938041 | -0.170454 | C | -6.397863 | -5.845148 | -1.502655 |
| N  | 2.006020  | 0.671874  | 0.658846  | C | -8.468887 | -4.040882 | -0.462060 |
| N  | -0.378528 | 0.941199  | 2.222755  | H | -4.055682 | -2.582942 | 3.008349  |
| C  | -2.203331 | -1.445495 | 2.373586  | H | -3.196003 | -4.388557 | 1.154839  |
| C  | -1.476432 | -2.938530 | 0.916111  | H | 1.154306  | -4.841794 | -1.873714 |
| C  | 0.536537  | -3.127417 | -0.525895 | H | 3.409742  | -3.356587 | -2.212240 |
| C  | 2.365348  | -1.919796 | -0.811723 | H | 5.087027  | 1.370261  | -0.508686 |
| C  | 3.135609  | 0.318231  | -0.054272 | H | 3.967219  | 3.389307  | 0.957317  |
| C  | 2.238247  | 1.947402  | 1.135593  | H | -0.626678 | 4.041766  | 3.504424  |
| C  | 0.116021  | 2.221547  | 2.393058  | H | -2.665958 | 2.370402  | 4.235150  |
| C  | -1.538697 | 0.873502  | 2.969902  | H | -2.047871 | -6.270040 | -3.657788 |
| C  | -3.154984 | -2.540242 | 2.386217  | H | -2.204337 | -8.325539 | -2.229758 |
| C  | -2.717777 | -3.453309 | 1.460999  | H | -1.744588 | -8.176370 | 0.237370  |
| C  | 1.395106  | -3.870803 | -1.428845 | H | -1.063370 | -5.981257 | 1.238356  |
| C  | 2.530640  | -3.123452 | -1.602729 | H | 5.975943  | -0.406046 | -4.582674 |
| C  | 4.106909  | 1.395393  | -0.019879 | H | 7.814554  | -1.825402 | -3.624465 |
| C  | 3.548929  | 2.406282  | 0.719731  | H | 7.593572  | -2.781356 | -1.310907 |
| C  | -0.780104 | 2.992171  | 3.232066  | H | 5.510581  | -2.327386 | 0.019350  |
| C  | -1.801435 | 2.152803  | 3.599215  | H | 2.936784  | 5.613069  | 5.233850  |
| C  | -0.705104 | -3.604010 | -0.055404 | H | 2.876687  | 7.589477  | 3.680868  |
| C  | 3.327828  | -0.893841 | -0.744582 | H | 2.123989  | 7.302148  | 1.299605  |
| C  | 1.354105  | 2.707603  | 1.924107  | H | 1.448839  | 5.004858  | 0.480780  |
| C  | -2.374755 | -0.252429 | 3.103139  | H | -6.910984 | 0.651709  | 3.882608  |
| O  | -0.375152 | -4.651960 | -4.596548 | H | -6.634360 | 0.439460  | 6.372271  |
| O  | 4.253661  | 0.714603  | -5.477715 | H | -4.388943 | -0.126513 | 7.346485  |
| O  | 2.754436  | 3.897746  | 6.638976  | H | -2.424446 | -0.460627 | 5.815499  |
| O  | -7.036348 | 1.160275  | 1.678188  | H | -1.881684 | -2.949577 | -2.322870 |
| N  | -1.483916 | -3.793745 | -2.783065 | H | 3.012957  | 0.508130  | -2.553377 |
| N  | 3.699815  | 0.264544  | -3.274611 | H | 1.982093  | 2.227143  | 4.056699  |
| N  | 2.366756  | 2.783956  | -3.422672 | H | -4.099935 | -0.067115 | 1.578206  |
| N  | 1.825437  | 3.954362  | -1.567926 | H | -0.102700 | -1.291397 | -6.414348 |
| N  | 2.248965  | 3.084602  | 4.545838  | H | 0.964195  | -2.575923 | -5.739643 |
| N  | -4.930046 | 0.277873  | 2.071233  | H | -0.498827 | -3.032728 | -6.647647 |
| N  | -4.895187 | -0.460047 | -0.653032 | H | -0.299180 | -0.242602 | -4.107152 |
| N  | -3.297607 | -1.848264 | -1.430414 | H | -0.826420 | -1.202795 | -2.696150 |
| N  | -1.201113 | -4.890854 | -0.625987 | H | 0.779058  | -1.512491 | -3.424671 |
| C  | -1.506256 | -4.973569 | -2.012182 | H | -2.398317 | -0.879553 | -5.426474 |
| C  | -1.849572 | -6.218061 | -2.580035 | H | -2.842125 | -2.605554 | -5.614872 |
| C  | -1.932108 | -7.361120 | -1.774658 | H | -2.974032 | -1.815008 | -4.007273 |
| C  | -1.676990 | -7.279323 | -0.395823 | H | 2.349057  | 2.348704  | -5.493448 |
| C  | -1.307862 | -6.050543 | 0.167713  | H | 1.386158  | 1.247729  | -4.449889 |
| C  | 4.599972  | -1.103161 | -1.507811 | H | 3.614018  | 6.015890  | -0.691621 |
| C  | 4.745421  | -0.549649 | -2.809806 | H | 4.835593  | 3.405847  | -4.853219 |
| C  | 5.901499  | -0.821462 | -3.570744 | H | -0.303422 | 2.513605  | -1.313812 |
| C  | 6.914979  | -1.619886 | -3.024703 | H | -0.388461 | 2.050073  | -3.052468 |
| C  | 6.793230  | -2.156339 | -1.733487 | H | 0.559667  | 1.061049  | -1.895966 |
| C  | 5.634050  | -1.899367 | -0.986728 | H | 6.996375  | 6.422556  | -1.564603 |
| C  | 1.787177  | 4.063326  | 2.388288  | H | 6.131917  | 7.621447  | -2.550518 |
| C  | 2.223615  | 4.228859  | 3.735768  | H | 5.589380  | 7.290365  | -0.875468 |
| C  | 2.612912  | 5.506702  | 4.191818  | H | 6.714765  | 6.366055  | -4.560294 |
| C  | 2.572030  | 6.597641  | 3.312785  | H | 7.574944  | 5.175408  | -3.561304 |
| C  | 2.153207  | 6.439137  | 1.982152  | H | 6.811265  | 4.658998  | -5.097273 |
| C  | 1.763521  | 5.170985  | 1.523911  | H | 3.435962  | -0.387778 | 6.190769  |
| C  | -3.560042 | -0.122119 | 4.010294  | H | 3.413831  | 0.593092  | 4.694630  |
| C  | -4.839839 | 0.184590  | 3.470048  | H | 4.470520  | 1.072439  | 6.060712  |

|   |           |           |           |
|---|-----------|-----------|-----------|
| H | 2.414646  | 0.481352  | 8.343413  |
| H | 3.426564  | 1.969767  | 8.251776  |
| H | 1.657908  | 2.113379  | 8.401497  |
| H | 0.859072  | -0.115275 | 6.449764  |
| H | 0.132742  | 1.523861  | 6.375232  |
| H | 0.850774  | 0.783226  | 4.912569  |
| H | -6.544585 | 0.842970  | -0.773322 |
| H | -4.968882 | 1.620861  | -0.442683 |
| H | -4.015352 | -4.597949 | -1.918480 |
| H | -7.568191 | -1.481067 | -0.112015 |
| H | -2.598294 | 1.026954  | 0.018697  |
| H | -1.562947 | 0.080087  | -1.080295 |
| H | -2.733990 | 1.262576  | -1.753856 |
| H | -7.207335 | -5.970280 | -2.253177 |
| H | -5.508864 | -6.396057 | -1.864704 |
| H | -6.752757 | -6.345972 | -0.576943 |
| H | -8.443195 | -4.861203 | 0.286437  |
| H | -9.134582 | -3.247867 | -0.071500 |
| H | -8.944413 | -4.466476 | -1.371204 |

|   |           |           |           |
|---|-----------|-----------|-----------|
| H | 2.552173  | 6.421994  | 0.420277  |
| H | 4.399899  | 4.757821  | 0.784821  |
| H | 3.881421  | 2.319979  | 0.965103  |
| H | 1.086846  | -3.389701 | -2.774796 |
| H | 3.382394  | -4.223346 | -3.296928 |
| H | 5.387844  | -2.776170 | -2.851503 |
| H | 5.059594  | -0.477088 | -1.889830 |
| H | 2.757971  | 0.362852  | -1.393927 |
| H | -2.021238 | -1.598120 | -0.981853 |
| H | -3.986061 | -1.794180 | -2.512930 |
| H | -3.679500 | -1.586798 | -5.001811 |
| H | -1.375852 | -1.186950 | -5.925647 |
| H | 0.576923  | -0.959618 | -4.391974 |
| H | -3.716380 | -1.409069 | 1.531490  |
| H | -5.482451 | 0.171097  | 2.343517  |
| H | -4.857429 | 2.479532  | 3.108032  |
| H | -2.440533 | 3.174605  | 3.100813  |
| H | -0.677366 | 1.568954  | 2.323935  |
| H | -0.103251 | -2.885060 | -0.117118 |
| H | 0.374545  | -5.168998 | 0.754815  |
| H | -0.177658 | -5.759591 | 3.139398  |
| H | -1.211177 | -4.017005 | 4.626708  |
| H | -1.660649 | -1.724196 | 3.760844  |
| H | 0.461986  | 2.527794  | -1.839765 |
| H | -0.229372 | 1.258005  | -2.936932 |
| H | -1.515262 | 3.933266  | -2.076928 |
| H | -1.447641 | 3.228034  | -3.727549 |
| H | -3.738642 | 2.830254  | -2.284757 |
| H | -2.995528 | 1.398224  | -3.079608 |
| H | -2.988750 | 0.611033  | -0.788833 |
| H | -2.716347 | 2.260852  | -0.123186 |

## LIBLEN

Conformation 1.  
Multiplicity: 3  
Charge: 0  
E(B97-3c) = -2729.966866050881 Hartree  
E(M06/def2-TZVP) = -2729.937241457135 Hartree  
E(PBE - D3(BJ)/def2-TZVP) = -2728.978699280144 Hartree  
E(PBE0 - D3(BJ)/def2-TZVP) = -2729.126280344690 Hartree  
E(PBEh-3c) = -2726.115674076072 Hartree  
E(PM6) = 93.42146 Kcal/mol  
E(PM7) = 107.36848 Kcal/mol  
E( $\omega$ B97X-V/def2-TZVP) = -2730.727815661306 Hartree  
E(GFN1-xTB) = -120.621411026550 Hartree  
E(GFN2-xTB) = -119.812202924278 Hartree  
E(GFN-FF) = -16.973041167079 Hartree

Coordinates:  
V 0.148242 -0.026838 0.006472  
O -1.054991 1.361986 -1.016424  
N -1.096676 -0.835887 1.270135  
N 0.478053 -1.000775 -1.686449  
N 1.462319 1.201804 0.773012  
C 2.017137 0.401549 1.784226  
C 2.183254 -0.983524 1.516250  
C 2.476117 -1.888298 2.550522  
C 2.684776 -1.422505 3.853281  
C 2.584644 -0.040640 4.117271  
C 2.244795 0.864002 3.108646  
C 1.738074 2.576796 0.712828  
C 0.704722 3.526644 0.523306  
C 0.999984 4.893088 0.412822  
C 2.324448 5.348976 0.503334  
C 3.355829 4.415967 0.710110  
C 3.071705 3.049311 0.812104  
C 1.764273 -1.456480 -2.043302  
C 1.963244 -2.750839 -2.589385  
C 3.252044 -3.212787 -2.879319  
C 4.376285 -2.406289 -2.627466  
C 4.191175 -1.124028 -2.088176  
C 2.902675 -0.646767 -1.809182  
C -0.588162 -1.232793 -2.572059  
C -1.889980 -1.486411 -2.069431  
C -2.987391 -1.598902 -2.933881  
C -2.818577 -1.488147 -4.324117  
C -1.527573 -1.269310 -4.837945  
C -0.427442 -1.142006 -3.981436  
C -2.084969 -0.005905 1.835610  
C -3.446007 -0.399826 1.877220  
C -4.428118 0.488637 2.330332  
C -4.080111 1.784581 2.756674  
C -2.731544 2.173352 2.747028  
C -1.739594 1.283773 2.305100  
C -0.915662 -2.141379 1.759139  
C -0.342883 -3.136911 0.926773  
C -0.074376 -4.418009 1.423388  
C -0.383931 -4.750481 2.752788  
C -0.966682 -3.775376 3.580462  
C -1.229065 -2.487810 3.097761  
C -0.467672 2.029558 -2.176591  
C -1.553037 2.984773 -2.652870  
C -2.830777 2.198082 -2.328049  
C -2.498583 1.583113 -0.974936  
H 2.135135 -1.351848 0.475670  
H 2.551897 -2.961056 2.320101  
H 2.929929 -2.125693 4.662523  
H 2.752382 0.332964 5.139643  
H 2.126688 1.934637 3.331250  
H -0.334726 3.174011 0.482183  
H 0.178196 5.612248 0.269176

Conformation 16.  
Multiplicity: 3  
Charge: 0  
E(B97-3c) = -2729.964561799386 Hartree  
E(M06/def2-TZVP) = -2729.930628848846 Hartree  
E(PBE - D3(BJ)/def2-TZVP) = -2728.975017083584 Hartree  
E(PBE0 - D3(BJ)/def2-TZVP) = -2729.122424078092 Hartree  
E(PBEh-3c) = -2726.114025205031 Hartree  
E(PM6) = 96.23616 Kcal/mol  
E(PM7) = 108.94007 Kcal/mol  
E( $\omega$ B97X-V/def2-TZVP) = -2730.723381385006 Hartree  
E(GFN1-xTB) = -120.618004568258 Hartree  
E(GFN2-xTB) = -119.811483928371 Hartree  
E(GFN-FF) = -16.979962862299 Hartree

Coordinates:  
V -0.137933 -0.071176 0.152538  
O 1.417017 -1.148629 -0.734736  
N -0.781529 -1.204491 1.597885  
N 1.079446 1.382368 0.707862  
N -1.355697 0.103107 -1.369455  
C -2.588101 0.752462 -1.208206  
C -3.289802 1.387666 -2.265222  
C -4.493929 2.060990 -2.018953  
C -5.041892 2.123008 -0.727229  
C -4.375826 1.464273 0.320492  
C -3.180271 0.778291 0.083979  
C -0.727732 0.066213 -2.639516  
C -0.436828 -1.177502 -3.245536  
C 0.281506 -1.236031 -4.448341  
C 0.711056 -0.055085 -5.078011  
C 0.410783 1.187292 -4.492983  
C -0.300339 1.251933 -3.286477  
C 2.323152 1.220980 1.315629  
C 3.308057 2.240174 1.417478  
C 4.540911 1.984591 2.033060  
C 4.837703 0.722422 2.572138  
C 3.853927 -0.281150 2.519825  
C 2.615591 -0.036312 1.919038  
C 0.670770 2.558819 0.044647  
C -0.645437 3.029563 0.280211  
C -1.184493 4.077961 -0.477539  
C -0.401224 4.721317 -1.449126  
C 0.920898 4.291048 -1.665962  
C 1.451017 3.214067 -0.944608  
C -0.876971 -2.593058 1.356168  
C -0.348385 -3.533849 2.274993  
C -0.347193 -4.899800 1.967990  
C -0.875135 -5.359598 0.746690  
C -1.425607 -4.436712 -0.156175  
C -1.438262 -3.066256 0.147244  
C -1.336956 -0.679454 2.784192  
C -2.423092 -1.316976 3.437797  
C -3.009812 -0.742121 4.571921  
C -2.543592 0.481441 5.081167  
C -1.468686 1.119194 4.440792  
C -0.864062 0.548080 3.313793  
C 2.428754 -0.457214 -1.538164  
C 3.297957 -1.573662 -2.099481

|   |           |           |           |   |           |           |           |
|---|-----------|-----------|-----------|---|-----------|-----------|-----------|
| C | 3.254167  | -2.609116 | -0.968118 | C | -0.035817 | 3.313721  | -3.224269 |
| C | 1.798276  | -2.541085 | -0.527180 | C | 1.061395  | 0.681862  | -2.508120 |
| H | -2.884466 | 1.353766  | -3.285555 | C | 2.274356  | 1.180914  | -3.059003 |
| H | -5.013866 | 2.547253  | -2.859413 | C | 3.147880  | 0.318714  | -3.723773 |
| H | -5.984815 | 2.658881  | -0.543722 | C | 2.876240  | -1.062050 | -3.825913 |
| H | -4.795631 | 1.467235  | 1.338376  | C | 1.684166  | -1.565978 | -3.296457 |
| H | -2.703037 | 0.228469  | 0.908826  | C | 0.762901  | -0.697174 | -2.683579 |
| H | -0.772476 | -2.097265 | -2.744544 | C | 0.728899  | 2.067567  | 1.978883  |
| H | 0.502085  | -2.214332 | -4.903425 | C | 0.350819  | 2.266049  | 3.439162  |
| H | 1.274467  | -0.102998 | -6.021963 | C | -1.165033 | 2.486769  | 3.343250  |
| H | 0.745368  | 2.119744  | -4.973468 | C | -1.583349 | 1.494680  | 2.261332  |
| H | -0.514027 | 2.222385  | -2.816271 | H | -3.744199 | -2.357112 | -1.471497 |
| H | 3.096274  | 3.242489  | 1.021574  | H | -3.744728 | -4.722917 | -2.239050 |
| H | 5.283513  | 2.795616  | 2.094513  | H | -1.668866 | -6.126991 | -2.050349 |
| H | 5.810093  | 0.530835  | 3.048955  | H | 0.411340  | -5.114539 | -1.053671 |
| H | 4.044252  | -1.265639 | 2.975688  | H | 0.396826  | -2.754590 | -0.245173 |
| H | 1.828834  | -0.807259 | 1.934520  | H | -2.416401 | 1.224042  | -1.547997 |
| H | -1.246835 | 2.553298  | 1.069586  | H | -4.399907 | 2.604373  | -0.893187 |
| H | -2.223934 | 4.391618  | -0.298752 | H | -5.976349 | 1.774957  | 0.886542  |
| H | -0.816828 | 5.553942  | -2.035866 | H | -5.540710 | -0.436875 | 1.991138  |
| H | 1.540092  | 4.784472  | -2.431314 | H | -3.532321 | -1.788984 | 1.356974  |
| H | 2.464033  | 2.848749  | -1.164777 | H | 2.571047  | -3.226088 | 0.900922  |
| H | 0.072812  | -3.169600 | 3.224224  | H | 4.806213  | -3.770838 | -0.082952 |
| H | 0.078595  | -5.616925 | 2.686970  | H | 6.161513  | -1.976978 | -1.204599 |
| H | -0.868172 | -6.434012 | 0.509762  | H | 5.254385  | 0.361469  | -1.328008 |
| H | -1.865519 | -4.786013 | -1.103365 | H | 3.030039  | 0.901160  | -0.324732 |
| H | -1.883800 | -2.331788 | -0.541450 | H | -0.951795 | -1.631932 | 1.893730  |
| H | -2.809801 | -2.264800 | 3.036323  | H | -1.450753 | -2.008359 | 4.317251  |
| H | -3.853737 | -1.255468 | 5.058734  | H | 0.375361  | -1.777259 | 6.034260  |
| H | -3.011263 | 0.930565  | 5.969815  | H | 2.699909  | -1.186644 | 5.281041  |
| H | -1.080659 | 2.072996  | 4.830448  | H | 3.182231  | -0.787230 | -0.868274 |
| H | -0.010695 | 1.044618  | 2.829862  | H | -0.972531 | 3.052113  | 0.052615  |
| H | 1.902348  | 0.140870  | -2.305238 | H | -1.754521 | 5.375511  | -0.393746 |
| H | 2.998971  | 0.210350  | -0.860146 | H | -1.447156 | 6.401079  | -2.672943 |
| H | 2.849484  | -1.982570 | -3.027912 | H | -0.367973 | 5.034266  | -4.488180 |
| H | 4.321057  | -1.220891 | -2.332526 | H | 0.409558  | 2.725694  | -4.038859 |
| H | 3.542932  | -3.628649 | -1.288729 | H | 2.528328  | 2.242980  | -2.931303 |
| H | 3.920039  | -2.299700 | -0.136075 | H | 4.082772  | 0.720934  | -4.144684 |
| H | 1.631203  | -2.792904 | 0.536612  | H | 3.593196  | -1.731468 | -4.322863 |
| H | 1.130907  | -3.175327 | -1.146792 | H | 1.435669  | -2.634650 | -3.381143 |

#### Conformation 18.

Multiplicity: 3

Charge: 0

E(B97-3c) = -2729.962431448459 Hartree

E(M06/def2-TZVP) = -2729.933890158355 Hartree

E(PBE - D3(BJ)/def2-TZVP) = -2728.974976017402 Hartree

E(PBE0 - D3(BJ)/def2-TZVP) = -2729.121676073942 Hartree

E(PBEh-3c) = -2726.109735138993 Hartree

E(PM6) = 95.03061 Kcal/mol

E(PM7) = 106.83274 Kcal/mol

E( $\omega$ B97X-V/def2-TZVP) = -2730.722727107324 Hartree

E(GFN1-xTB) = -120.618089184468 Hartree

E(GFN2-xTB) = -119.807817577605 Hartree

E(GFN-FF) = -16.971498364356 Hartree

#### Coordinates:

|   |           |           |           |
|---|-----------|-----------|-----------|
| V | -0.012522 | 0.061355  | -0.244565 |
| O | -0.407392 | 1.356650  | 1.400977  |
| N | 0.213265  | 1.416040  | -1.162973 |
| N | 1.364834  | -0.828554 | 0.863039  |
| N | -1.623500 | -1.037301 | -0.406396 |
| C | -1.669136 | -2.384907 | -0.802962 |
| C | -2.835022 | -2.966303 | -1.366297 |
| C | -2.827977 | -4.297216 | -1.801845 |
| C | -1.667787 | -5.083538 | -1.701976 |
| C | -0.507995 | -4.515704 | -1.148633 |
| C | -0.505583 | -3.190877 | -0.697226 |
| C | -2.824074 | -0.352444 | -0.116279 |
| C | -3.098383 | 0.877821  | -0.758260 |
| C | -4.217799 | 1.641904  | -0.390921 |
| C | -5.096638 | 1.179085  | 0.600522  |
| C | -4.851721 | -0.062913 | 1.217813  |
| C | -3.730403 | -0.823517 | 0.867065  |
| C | 2.642836  | -1.128260 | 0.335604  |
| C | 3.166157  | -2.444045 | 0.405325  |
| C | 4.418680  | -2.741872 | -0.142373 |
| C | 5.177893  | -1.739351 | -0.772550 |
| C | 4.670534  | -0.434197 | -0.840897 |
| C | 3.420393  | -0.126892 | -0.284213 |
| C | 1.134881  | -1.142984 | 2.213257  |
| C | -0.163580 | -1.508837 | 2.651179  |
| C | -0.432389 | -1.723584 | 4.008815  |
| C | 0.586489  | -1.601848 | 4.968947  |
| C | 1.886662  | -1.275226 | 4.543616  |
| C | 2.163361  | -1.050411 | 3.189091  |
| C | -0.171142 | -2.731517 | -1.934673 |
| C | -0.812658 | 3.506092  | -0.931893 |
| C | -1.261351 | 4.804858  | -1.196542 |
| C | -1.095860 | 5.379164  | -2.467766 |
| C | -0.486871 | 4.615046  | -3.476711 |

#### Conformation 23.

Multiplicity: 3

Charge: 0

E(B97-3c) = -2729.963443487621 Hartree

E(M06/def2-TZVP) = -2729.934780274221 Hartree

E(PBE - D3(BJ)/def2-TZVP) = -2728.975572919945 Hartree

E(PBE0 - D3(BJ)/def2-TZVP) = -2729.122143913105 Hartree

E(PBEh-3c) = -2726.112754512889 Hartree

E(PM6) = 100.67900 Kcal/mol

E(PM7) = 104.96765 Kcal/mol

E( $\omega$ B97X-V/def2-TZVP) = -2730.723799723231 Hartree

E(GFN1-xTB) = -120.618239351420 Hartree

E(GFN2-xTB) = -119.808564111014 Hartree

E(GFN-FF) = -16.862550004130 Hartree

#### Coordinates:

|   |           |           |           |
|---|-----------|-----------|-----------|
| V | 0.084955  | -0.244491 | 0.119729  |
| O | -0.494056 | 0.328922  | -1.845312 |
| N | -0.212990 | 1.608821  | 0.712793  |
| N | -1.209830 | -1.674573 | 0.404704  |
| N | 1.957445  | -0.763471 | -0.176730 |
| C | 2.973182  | -0.615769 | 0.782314  |
| C | 4.088901  | -1.490840 | 0.845570  |
| C | 5.042992  | -1.357149 | 1.862147  |
| C | 4.914764  | -0.361176 | 2.845189  |
| C | 3.813927  | 0.510216  | 2.790310  |
| C | 2.860340  | 0.393752  | 1.772476  |
| C | 2.230693  | -1.427439 | -1.390253 |
| C | 3.296076  | -1.027555 | -2.236432 |
| C | 3.469285  | -1.625654 | -3.489903 |
| C | 2.591579  | -2.634420 | -3.931393 |
| C | 1.549361  | -3.054497 | -3.090669 |
| C | 1.377339  | -2.469245 | -1.826262 |
| C | -2.176233 | -2.416664 | -0.269194 |
| C | -2.238668 | -2.354566 | -1.688628 |
| C | -3.177079 | -3.106823 | -2.403526 |
| C | -4.077365 | -3.955605 | -1.737820 |
| C | -4.002187 | -4.052584 | -0.338661 |
| C | -3.069121 | -3.304150 | 0.389699  |
| C | -1.102284 | -1.594729 | 1.806553  |
| C | -2.179391 | -1.256736 | 2.675452  |



|   |           |           |           |   |           |           |           |
|---|-----------|-----------|-----------|---|-----------|-----------|-----------|
| C | -1.941761 | -1.022031 | 4.028631  | C | 0.173035  | 3.016855  | 3.118845  |
| C | -0.634098 | -1.074814 | 4.558687  | C | 1.556377  | -1.385810 | -2.020705 |
| C | 0.434310  | -1.406426 | 3.722310  | C | 1.348240  | -2.718926 | -1.596645 |
| C | 0.203188  | -1.699037 | 2.363626  | C | 2.360658  | -3.678780 | -1.737752 |
| C | 0.212629  | 2.717870  | -0.028845 | C | 3.589896  | -3.335779 | -2.322893 |
| C | 1.368096  | 2.610669  | -0.850218 | C | 3.797799  | -2.018469 | -2.769323 |
| C | 1.771986  | 3.669969  | -1.669927 | C | 2.795178  | -1.051679 | -2.621987 |
| C | 1.060604  | 4.883361  | -1.679620 | C | 0.141117  | 0.355507  | -2.905473 |
| C | -0.056091 | 5.018778  | -0.838156 | C | -0.215737 | 1.719218  | -2.754114 |
| C | -0.478299 | 3.960524  | -0.022182 | C | -0.756111 | 2.446940  | -3.823166 |
| C | -1.072308 | 1.854622  | 1.821399  | C | -0.934440 | 1.846844  | -5.080355 |
| C | -2.475899 | 1.765263  | 1.686486  | C | -0.548268 | 0.504998  | -5.254092 |
| C | -3.319379 | 2.038867  | 2.772829  | C | -0.016941 | -0.232838 | -4.190025 |
| C | -2.775106 | 2.396418  | 4.015983  | C | -0.965838 | -2.633046 | 1.377718  |
| C | -1.380720 | 2.476205  | 4.164357  | C | -0.522121 | -3.957198 | 1.628114  |
| C | -0.536267 | 2.213647  | 3.076835  | C | -1.441197 | -5.005844 | 1.752099  |
| C | -1.795195 | 0.976095  | -1.977732 | C | -2.821464 | -4.769343 | 1.631310  |
| C | -1.966054 | 1.196470  | -3.474684 | C | -3.271978 | -3.460033 | 1.396314  |
| C | -0.521212 | 1.466613  | -3.915787 | C | -2.360094 | -2.402708 | 1.277673  |
| C | 0.264919  | 0.458108  | -3.088448 | C | 1.116280  | -1.551720 | 2.023536  |
| H | 4.191293  | -2.288074 | 0.095230  | C | 1.015346  | -1.593386 | 3.436524  |
| H | 5.896363  | -2.052622 | 1.892023  | C | 2.152336  | -1.415890 | 4.230381  |
| H | 5.666908  | -0.263575 | 3.642029  | C | 3.410194  | -1.186700 | 3.640904  |
| H | 3.700099  | 1.303359  | 3.545937  | C | 3.522270  | -1.160867 | 2.244039  |
| H | 2.004872  | 1.084439  | 1.721490  | C | 2.389786  | -1.359532 | 1.437351  |
| H | 3.973032  | -0.227978 | -1.899131 | C | -2.674904 | 1.569488  | -0.253054 |
| H | 4.294785  | -1.293881 | -4.138846 | C | -4.046258 | 1.413050  | -0.897104 |
| H | 2.730595  | -3.096279 | -4.920308 | C | -3.733934 | 0.538995  | -2.121016 |
| H | 0.864110  | -3.854705 | -3.410289 | C | -2.711950 | -0.446529 | -1.568330 |
| H | 0.578805  | -2.813816 | -1.152256 | H | 2.717130  | 1.012249  | 0.080937  |
| H | -1.511149 | -1.724736 | -2.216301 | H | 4.005515  | 2.462231  | -1.496734 |
| H | -3.196564 | -3.035179 | -3.502596 | H | 3.198917  | 4.785326  | -2.019466 |
| H | -4.815358 | -4.544700 | -2.301742 | H | 1.084069  | 5.625028  | -0.957638 |
| H | -4.680161 | -4.731599 | 0.201938  | H | -0.239480 | 4.147004  | 0.556666  |
| H | -3.014773 | -3.416951 | 1.481333  | H | -1.546080 | 0.150260  | 2.362620  |
| H | -3.192356 | -1.155048 | 2.263158  | H | -2.622283 | 0.687672  | 4.533122  |
| H | -2.784226 | -0.753391 | 4.683511  | H | -1.903480 | 2.715366  | 5.845286  |
| H | -0.462410 | -0.857988 | 5.623317  | H | -0.072975 | 4.174848  | 4.925001  |
| H | 1.460665  | -1.468852 | 4.113801  | H | 0.984640  | 3.656851  | 2.745356  |
| H | 1.020503  | -2.077626 | 1.732922  | H | 0.384809  | -2.986332 | -1.138591 |
| H | 1.952422  | 1.678613  | -0.812456 | H | 2.180656  | -4.707851 | -1.390615 |
| H | 2.672447  | 3.553329  | -2.293627 | H | 4.382812  | -4.090503 | -2.433314 |
| H | 1.386360  | 5.718809  | -2.316726 | H | 4.758712  | -3.88821  | -3.228731 |
| H | -0.614830 | 5.967701  | -0.815953 | H | 2.957246  | -0.015177 | -2.954320 |
| H | -1.356823 | 4.084489  | 0.627132  | H | -0.021283 | 2.220925  | -1.796104 |
| H | -2.898028 | 1.482182  | 0.711417  | H | -1.013098 | 3.507379  | -3.673005 |
| H | -4.410841 | 1.968819  | 2.646723  | H | -1.349452 | 2.421305  | -5.921753 |
| H | -3.436014 | 2.609723  | 4.869694  | H | -0.669818 | 0.021831  | -6.236315 |
| H | -0.944867 | 2.746635  | 5.138412  | H | 0.271022  | -1.285116 | -4.332227 |
| H | 0.555961  | 2.282227  | 3.185502  | H | 0.558045  | -4.145399 | 1.717320  |
| H | -2.550425 | 0.301154  | -1.527515 | H | -1.073044 | -6.026319 | 1.940928  |
| H | -1.763247 | 1.935843  | -1.421167 | H | -3.539468 | -5.596940 | 1.729177  |
| H | -2.364076 | 0.281117  | -3.960574 | H | -4.351323 | -3.253861 | 1.322636  |
| H | -2.656965 | 2.033219  | -3.693384 | H | -2.713377 | -1.372775 | 1.128717  |
| H | -0.358470 | 1.328738  | -5.002126 | H | 0.026809  | -1.741204 | 3.894792  |
| H | -0.219436 | 2.499160  | -3.642454 | H | 2.054898  | -1.436177 | 5.326765  |
| H | 1.287232  | 0.787312  | -2.834424 | H | 4.298295  | -1.036154 | 4.272615  |
| H | 0.319588  | -0.544615 | -3.561387 | H | 4.502320  | -1.004282 | 1.767909  |

Conformation 24.

Multiplicity: 3

Charge: 0

E(B97-3c) = -2729.959646467439 Hartree

E(M06/def2-TZVP) = -2729.925289336170 Hartree

E(PBE - D3(BJ)/def2-TZVP) = -2728.970647530242 Hartree

E(PBE0 - D3(BJ)/def2-TZVP) = -2729.117039345907 Hartree

E(PBEh-3c) = -2726.107983531869 Hartree

E(PM6) = 98.70431 Kcal/mol

E(PM7) = 108.63642 Kcal/mol

E( $\omega$ B97X-V/def2-TZVP) = -2730.718292643711 Hartree

E(GFN1-xTB) = -120.618526462890 Hartree

E(GFN2-xTB) = -119.807159859993 Hartree

E(GFN-FF) = -16.972082654530 Hartree

Coordinates:

|   |           |           |           |
|---|-----------|-----------|-----------|
| V | -0.035653 | -0.059492 | 0.043668  |
| O | -1.997416 | 0.303335  | -0.529781 |
| N | -0.046809 | -1.585194 | 1.215163  |
| N | 0.570884  | -0.393892 | -1.801395 |
| N | 0.343647  | 1.550030  | 1.131214  |
| C | 1.135881  | 2.463102  | 0.405458  |
| C | 2.350306  | 2.017315  | -0.173117 |
| C | 3.073518  | 2.839584  | -1.048388 |
| C | 2.627620  | 4.138700  | -1.337260 |
| C | 1.443821  | 4.607312  | -0.739733 |
| C | 0.700475  | 3.783924  | 0.114948  |
| C | -0.241133 | 1.894934  | 2.349974  |
| C | -1.254726 | 1.063193  | 2.902805  |
| C | -1.843346 | 1.358509  | 4.137738  |
| C | -1.441661 | 2.484971  | 4.874009  |
| C | -0.422230 | 3.300513  | 4.353414  |

Conformation 25.

Multiplicity: 3

Charge: 0

E(B97-3c) = -2729.955983537547 Hartree

E(M06/def2-TZVP) = -2729.925799006199 Hartree

E(PBE - D3(BJ)/def2-TZVP) = -2728.967883495028 Hartree

E(PBE0 - D3(BJ)/def2-TZVP) = -2729.113726898050 Hartree

E(PBEh-3c) = -2726.103006289170 Hartree

E(PM6) = 101.67079 Kcal/mol

E(PM7) = 106.53882 Kcal/mol

E( $\omega$ B97X-V/def2-TZVP) = -2730.714756718114 Hartree

E(GFN1-xTB) = -120.617452474203 Hartree

E(GFN2-xTB) = -119.807681266316 Hartree

E(GFN-FF) = -16.864314400124 Hartree

Coordinates:

|   |           |           |           |
|---|-----------|-----------|-----------|
| V | 0.074114  | 0.117593  | -0.072313 |
| O | -1.546208 | 0.058277  | -1.435743 |
| N | -0.134847 | -1.624383 | 0.781188  |
| N | 1.309470  | 0.617901  | -1.608712 |
| N | -0.387592 | 1.505243  | 1.157273  |
| C | 0.636731  | 1.195669  | 2.080296  |
| C | 1.979104  | 1.172811  | 1.617747  |

|   |           |           |           |
|---|-----------|-----------|-----------|
| C | 2.996269  | 0.632685  | 2.429223  |
| C | 2.704231  | 0.158286  | 3.709622  |
| C | 1.378520  | 0.223109  | 4.190506  |
| C | 0.353790  | 0.729943  | 3.394052  |
| C | -1.462299 | 2.339095  | 1.472340  |
| C | -1.333536 | 3.373931  | 2.433787  |
| C | -2.409175 | 4.226967  | 2.708197  |
| C | -3.635127 | 4.079297  | 2.037725  |
| C | -3.770956 | 3.056933  | 1.084024  |
| C | -2.704442 | 2.194467  | 0.803477  |
| C | 1.970475  | -0.516647 | -2.102505 |
| C | 1.223818  | -1.678443 | -2.430122 |
| C | 1.864112  | -2.877774 | -2.775160 |
| C | 3.263329  | -2.943508 | -2.839968 |
| C | 4.017501  | -1.790115 | -2.549783 |
| C | 3.388091  | -0.596677 | -2.181853 |
| C | 1.591098  | 1.887996  | -2.106104 |
| C | 2.246238  | 2.091910  | -3.355352 |
| C | 2.469643  | 3.380987  | -3.851750 |
| C | 2.045634  | 4.518215  | -3.142380 |
| C | 1.380427  | 4.333412  | -1.919406 |
| C | 1.155377  | 3.050334  | -1.406567 |
| C | -1.438324 | -2.126789 | 0.989781  |
| C | -2.453333 | -1.303300 | 1.529258  |
| C | -3.772003 | -1.773275 | 1.643183  |
| C | -4.097294 | -3.078210 | 1.243418  |
| C | -3.085290 | -3.918532 | 0.739946  |
| C | -1.770874 | -3.453764 | 0.618346  |
| C | 0.925442  | -2.265358 | 1.452270  |
| C | 0.722858  | -2.917357 | 2.697552  |
| C | 1.793530  | -3.506418 | 3.379012  |
| C | 3.094549  | -3.460124 | 2.849153  |
| C | 3.303799  | -2.823648 | 1.615647  |
| C | 2.237859  | -2.240219 | 0.920373  |
| C | -1.625365 | 1.146409  | -2.409932 |
| C | -2.977331 | 0.952565  | -3.078387 |
| C | -3.082378 | -0.578350 | -3.122537 |
| C | -2.516490 | -0.986255 | -1.765996 |
| H | 2.223609  | 1.615295  | 0.640363  |
| H | 4.026851  | 0.597759  | 2.046037  |
| H | 3.498059  | -0.270663 | 4.337638  |
| H | 1.144921  | -0.155321 | 5.197406  |
| H | -0.685706 | 0.746394  | 3.752982  |
| H | -0.373830 | 3.503314  | 2.955159  |
| H | -2.284256 | 5.025468  | 3.455993  |
| H | -4.475987 | 4.753332  | 2.257712  |
| H | -4.727000 | 2.920406  | 0.554640  |
| H | -2.818200 | 1.378012  | 0.078321  |
| H | 0.126639  | -1.625825 | -2.399532 |
| H | 1.258388  | -3.768092 | -3.004348 |
| H | 3.765971  | -3.883090 | -3.112433 |
| H | 5.117262  | -1.829603 | -2.592402 |
| H | 3.983544  | 0.291830  | -1.924963 |
| H | 2.570960  | 1.220078  | -3.940985 |
| H | 2.979407  | 3.496971  | -4.821526 |
| H | 2.224740  | 5.528058  | -3.539557 |
| H | 1.028242  | 5.204228  | -1.344304 |
| H | 0.625538  | 2.929153  | -0.450077 |
| H | -2.191717 | -0.288940 | 1.860120  |
| H | -4.546563 | -1.109825 | 2.058174  |
| H | -5.129815 | -3.447447 | 1.334418  |
| H | -3.328643 | -4.947386 | 0.431980  |
| H | -0.976950 | -4.101566 | 0.216832  |
| H | -0.287766 | -2.942589 | 3.129786  |
| H | 1.609605  | -4.000721 | 4.345877  |
| H | 3.933119  | -3.925792 | 3.388340  |
| H | 4.310936  | -2.788913 | 1.171958  |
| H | 2.419406  | -1.773865 | -0.055573 |
| H | -1.508656 | 2.100324  | -1.859169 |
| H | -0.779064 | 1.045248  | -3.119661 |
| H | -3.788021 | 1.385757  | -2.455584 |
| H | -3.019017 | 1.427735  | -4.077129 |
| H | -4.115864 | -0.948206 | -3.266150 |
| H | -2.456102 | -0.981764 | -3.945021 |
| H | -1.993049 | -1.961080 | -1.761435 |
| H | -3.284136 | -1.003563 | -0.966717 |

| Coordinates: |           |           |           |
|--------------|-----------|-----------|-----------|
| V            | -0.197347 | -0.051908 | 0.003607  |
| O            | 1.358489  | -0.789359 | 1.191465  |
| N            | -1.823320 | -0.608040 | 0.916008  |
| N            | 0.193916  | 1.857244  | 0.138218  |
| N            | 0.313021  | -1.139769 | -1.559348 |
| C            | 0.586148  | -0.228895 | -2.601915 |
| C            | 1.876465  | -0.038888 | -3.164024 |
| C            | 2.103513  | 0.997875  | -4.077522 |
| C            | 1.069545  | 1.884115  | -4.432872 |
| C            | -0.209757 | 1.706033  | -3.884853 |
| C            | -0.456332 | 0.644183  | -3.003563 |
| C            | 0.704382  | -2.477194 | -1.564076 |
| C            | 0.392133  | -3.271596 | -0.423820 |
| C            | 0.777365  | -4.613469 | -0.348835 |
| C            | 1.461434  | -5.225055 | -1.414398 |
| C            | 1.726335  | -4.468372 | -2.567363 |
| C            | 1.354883  | -3.119758 | -2.615619 |
| C            | 1.542820  | 2.182279  | 0.432268  |
| C            | 1.975041  | 2.234980  | 1.777166  |
| C            | 3.325571  | 2.452217  | 2.085803  |
| C            | 4.267411  | 2.640089  | 1.058770  |
| C            | 3.843704  | 2.608926  | -0.280802 |
| C            | 2.495988  | 2.380342  | -0.595341 |
| C            | -0.643162 | 2.804299  | -0.467530 |
| C            | -0.202972 | 4.082459  | -0.898263 |
| C            | -1.083459 | 4.959879  | -1.544842 |
| C            | -2.422163 | 4.605029  | -1.779561 |
| C            | -2.879199 | 3.356527  | -1.323812 |
| C            | -2.012679 | 2.476917  | -0.666538 |
| C            | -3.020821 | -0.906582 | 0.233300  |
| C            | -4.286863 | -0.564005 | 0.775541  |
| C            | -5.461791 | -0.808386 | 0.053526  |
| C            | -5.413041 | -1.389206 | -1.224586 |
| C            | -4.164415 | -1.734270 | -1.767731 |
| C            | -2.983054 | -1.507526 | -1.050794 |
| C            | -1.865113 | -0.479650 | 2.324689  |
| C            | -2.226264 | -1.576992 | 3.143192  |
| C            | -2.161553 | -1.472984 | 4.538010  |
| C            | -1.744889 | -0.274310 | 5.146796  |
| C            | -1.414339 | 0.828152  | 4.343201  |
| C            | -1.483082 | 0.733122  | 2.943865  |
| C            | 1.285401  | -1.289921 | 2.559418  |
| C            | 2.733062  | -1.559307 | 2.951510  |
| C            | 3.365432  | -1.956701 | 1.611479  |
| C            | 2.707087  | -0.977532 | 0.651169  |
| H            | 2.707167  | -0.686620 | -2.849503 |
| H            | 3.111628  | -1.133992 | -4.499331 |
| H            | 1.263508  | 2.708761  | -5.134613 |
| H            | -1.028853 | 2.393819  | -4.143050 |
| H            | -1.470194 | 0.478086  | -2.607224 |
| H            | -0.191989 | -2.816574 | 0.391806  |
| H            | 0.518184  | -5.197381 | 0.548404  |
| H            | 1.760164  | -6.281912 | -1.356227 |
| H            | 2.230361  | -4.936935 | -3.427188 |
| H            | 1.556882  | -2.556633 | -3.572660 |
| H            | 1.232031  | 2.084007  | 2.574052  |
| H            | 3.645491  | 2.482755  | 3.139155  |
| H            | 5.326534  | 2.812740  | 1.302184  |
| H            | 4.572721  | 2.751330  | -1.093541 |
| H            | 2.165909  | 2.329867  | -1.643272 |
| H            | 0.839413  | 4.384720  | -0.728835 |
| H            | -0.711000 | 5.943254  | -1.872516 |
| H            | -3.104358 | 5.299355  | -2.291861 |
| H            | -3.930826 | -3.062349 | -1.464701 |
| H            | -2.403040 | 1.524526  | -0.277092 |
| H            | -4.335726 | -0.091752 | 1.767279  |
| H            | -6.431396 | -0.529737 | 0.495038  |
| H            | -6.338805 | -1.575202 | -1.788897 |
| H            | -4.105008 | -2.202685 | -2.762317 |
| H            | -2.009990 | -1.799675 | -1.470835 |
| H            | -2.543723 | -2.514207 | 2.661406  |
| H            | -2.432303 | -2.339899 | 5.160560  |
| H            | -1.691725 | -0.199298 | 6.243222  |
| H            | -1.110844 | 1.779311  | 4.807700  |
| H            | -1.234904 | 1.591310  | 2.301509  |
| H            | 0.776200  | -0.530091 | 3.180340  |
| H            | 0.671440  | -2.215000 | 2.553643  |
| H            | 3.204336  | -0.633111 | 3.340167  |
| H            | 2.811942  | -2.343396 | 3.728976  |
| H            | 4.468780  | -1.867556 | 1.602883  |
| H            | 3.092754  | -2.997484 | 1.339774  |
| H            | 2.605757  | -1.607703 | -0.380118 |
| H            | 3.209948  | 0.010679  | 0.640691  |

Conformation 26.

Multiplicity: 3

Charge: 0

E(B97-3c) = -2729.964216386315 Hartree

E(M06/def2-TZVP) = -2729.930975643906 Hartree

E(PBE - D3(BJ)/def2-TZVP) = -2728.974510974628 Hartree

E(PBE0 - D3(BJ)/def2-TZVP) = -2729.122015287553 Hartree

E(PBEh-3c) = -2726.114188423216 Hartree

E(PM6) = 97.21117 Kcal/mol

E(PM7) = 108.99983 Kcal/mol

E( $\omega$ B97X-V/def2-TZVP) = -2730.723269768401 Hartree

E(GFN1-xTB) = -120.617648913205 Hartree

E(GFN2-xTB) = -119.810159717639 Hartree

E(GFN-FF) = -16.977859831628 Hartree

Conformation 3.

Multiplicity: 3

Charge: 0

E(B97-3c) = -2729.966391890795 Hartree

E(M06/def2-TZVP) = -2729.935869948631 Hartree

E(PBE - D3(BJ)/def2-TZVP) = -2728.978110775809 Hartree  
 E(PBE0 - D3(BJ)/def2-TZVP) = -2729.125807407539 Hartree  
 E(PBEh-3c) = -2726.115001053493 Hartree  
 E(PM6) = 93.45212 Kcal/mol  
 E(PM7) = 107.94963 Kcal/mol  
 E( $\omega$ B97X-V/def2-TZVP) = -2730.727558605072 Hartree  
 E(GFN1-xTB) = -120.620694896015 Hartree  
 E(GFN2-xTB) = -119.811519704521 Hartree  
 E(GFN-FF) = -16.974265006480 Hartree

H -2.584306 0.421441 -3.483250  
 H -0.229657 0.093132 -2.940167  
 H -0.371451 -1.706822 -3.072063

Conformation 31.

Multiplicity: 3

Charge: 0

E(B97-3c) = -2729.958255893322 Hartree  
 E(M06/def2-TZVP) = -2729.925008681189 Hartree  
 E(PBE - D3(BJ)/def2-TZVP) = -2728.968740555135 Hartree  
 E(PBE0 - D3(BJ)/def2-TZVP) = -2729.112489313793 Hartree  
 E(PBEh-3c) = -2726.102786504222 Hartree  
 E(PM6) = 96.24529 Kcal/mol  
 E(PM7) = 111.94988 Kcal/mol  
 E( $\omega$ B97X-V/def2-TZVP) = -2730.713056956968 Hartree  
 E(GFN1-xTB) = -120.623932761891 Hartree  
 E(GFN2-xTB) = -119.809801963980 Hartree  
 E(GFN-FF) = -16.965474518106 Hartree

Coordinates:

|   |           |           |            |
|---|-----------|-----------|------------|
| V | 0.127535  | 0.008650  | -0.008529  |
| O | -1.232230 | -0.840392 | -1.1376001 |
| N | 1.551582  | -1.322939 | -0.143080  |
| N | 0.205770  | 1.694905  | -1.045249  |
| N | -0.880349 | 0.056511  | 1.660524   |
| C | -0.620298 | 0.995508  | 2.673029   |
| C | -0.731751 | 0.663771  | 4.047177   |
| C | -0.391710 | 1.595634  | 5.035375   |
| C | 0.072222  | 2.876213  | 4.689770   |
| C | 0.180301  | 3.216224  | 3.330701   |
| C | -0.169422 | 2.297536  | 2.334178   |
| C | -1.729648 | -1.038556 | 1.922004   |
| C | -3.084289 | -0.852391 | 2.292552   |
| C | -3.942977 | -1.951141 | 2.415195   |
| C | -3.473214 | -3.257398 | 2.179112   |
| C | -2.124254 | -3.454754 | 1.845014   |
| C | -1.254119 | -2.358309 | 1.732957   |
| C | 1.424329  | 2.366613  | -1.279657  |
| C | 2.590672  | 1.636677  | -1.616068  |
| C | 3.823168  | 2.286635  | -1.770496  |
| C | 3.920498  | 3.678015  | -1.615934  |
| C | 2.765660  | 4.414725  | -1.298034  |
| C | 1.533581  | 3.772875  | -1.127741  |
| C | -0.978876 | 2.251921  | -1.558546  |
| C | -1.023550 | 2.867528  | -2.837940  |
| C | -2.236535 | 3.317214  | -3.373413  |
| C | -3.438814 | 3.170407  | -2.657280  |
| C | -3.403743 | 2.582733  | -1.382235  |
| C | -2.192389 | 2.139912  | -0.833202  |
| C | 2.296609  | -1.088855 | 1.022234   |
| C | 2.386130  | 0.250192  | 1.487961   |
| C | 2.875805  | 0.537757  | 2.771533   |
| C | 3.362300  | -0.494100 | 3.583935   |
| C | 3.339375  | -1.819647 | 3.104849   |
| C | 2.804876  | -2.125515 | 1.849852   |
| C | 1.787689  | -2.464281 | -0.928617  |
| C | 3.099384  | -2.777754 | -1.364880  |
| C | 3.334616  | -3.892741 | -2.178036  |
| C | 2.272707  | -4.722184 | -2.579084  |
| C | 0.971409  | -4.426805 | -2.142944  |
| C | 0.728210  | -3.317067 | -1.320587  |
| C | -2.640825 | -1.187932 | -1.195276  |
| C | -3.153479 | -1.500850 | -2.599033  |
| C | -2.252431 | -0.636825 | -3.492379  |
| C | -0.905099 | -0.770848 | -2.799283  |
| H | -1.068243 | -0.344065 | 4.329898   |
| H | -0.479327 | 1.310201  | 6.095425   |
| H | 0.342312  | 3.601948  | 5.471192   |
| H | 0.532554  | 4.217236  | 3.036672   |
| H | -0.091618 | 2.575560  | 1.272599   |
| H | -3.452280 | 0.171038  | 2.460990   |
| H | -4.997188 | -1.788248 | 2.688450   |
| H | -4.155224 | -4.115958 | 2.270609   |
| H | -1.736196 | -4.472098 | 1.681969   |
| H | -0.188455 | -2.505402 | 1.503140   |
| H | 2.513369  | 0.545654  | -1.744046  |
| H | 4.715962  | 1.694779  | -2.024758  |
| H | 4.887595  | 4.186877  | -1.742546  |
| H | 2.828205  | 5.506506  | -1.168577  |
| H | 0.634871  | 4.351949  | -0.867558  |
| H | -0.090666 | 2.976851  | -3.410967  |
| H | -2.245307 | 3.782157  | -4.371718  |
| H | -4.388598 | 3.525640  | -3.083759  |
| H | -4.329891 | 2.482380  | -0.794731  |
| H | -2.162512 | 1.699898  | 0.175964   |
| H | 2.111785  | 1.085591  | 0.817683   |
| H | 2.885318  | 1.580589  | 3.121536   |
| H | 3.764873  | -0.272116 | 4.583016   |
| H | 3.726030  | -2.634705 | 3.736673   |
| H | 2.749275  | -3.167345 | 1.501804   |
| H | 3.929739  | -2.124928 | -1.055813  |
| H | 4.360961  | -4.113313 | -2.510336  |
| H | 2.460583  | -5.595430 | -3.221307  |
| H | 0.132105  | -5.077780 | -2.434198  |
| H | -0.285031 | -3.098428 | -0.956609  |
| H | -2.699975 | -2.037767 | -0.489549  |
| H | -3.148714 | -0.310007 | -0.750050  |
| H | -3.019835 | -2.577305 | -2.833671  |
| H | -4.228860 | -1.259590 | -2.703589  |
| H | -2.216629 | -0.984992 | -4.542785  |

Coordinates:

|   |           |           |           |
|---|-----------|-----------|-----------|
| V | 0.072688  | 0.203866  | -0.350068 |
| O | 2.167481  | 0.633990  | -0.916409 |
| N | -1.671638 | 0.330633  | -1.204207 |
| N | 0.492721  | -1.708377 | -0.226716 |
| N | -0.034411 | 1.166958  | 1.338637  |
| C | -0.826777 | 0.730297  | 2.419543  |
| C | -1.040424 | -0.651879 | 2.649153  |
| C | -1.881062 | -1.086460 | 3.681717  |
| C | -2.519891 | -0.161594 | 4.523275  |
| C | -2.301754 | 1.210942  | 4.315438  |
| C | -1.469810 | 1.659924  | 3.280873  |
| C | 0.687333  | 2.372185  | 1.485452  |
| C | 1.565779  | 2.567741  | 2.582263  |
| C | 2.361298  | 3.716169  | 2.662347  |
| C | 2.301858  | 4.700142  | 1.657012  |
| C | 1.416094  | 4.527959  | 0.581831  |
| C | 0.605949  | 3.384779  | 0.501686  |
| C | 1.685790  | -2.147824 | 0.378966  |
| C | 2.270813  | -1.415667 | 1.443018  |
| C | 3.512636  | -1.786986 | 1.975445  |
| C | 4.200746  | -2.906074 | 1.478036  |
| C | 3.616517  | -3.658640 | 0.443011  |
| C | 2.378789  | -3.292029 | -0.099312 |
| C | -0.403361 | -2.703843 | -0.691689 |
| C | -0.829278 | -3.750041 | 0.162433  |
| C | -1.782576 | -4.679066 | -0.270814 |
| C | -2.328906 | -4.589521 | -1.562530 |
| C | -1.894679 | -3.571011 | -2.424404 |
| C | -0.932896 | -2.645581 | -1.999124 |
| C | -1.581314 | 1.595628  | -1.806917 |
| C | -2.497551 | 2.647426  | -1.527573 |
| C | -2.259438 | 3.935217  | -2.010226 |
| C | -1.108825 | 4.221532  | -2.777536 |
| C | -0.212775 | 3.190967  | -3.085355 |
| C | -0.457715 | 1.883180  | -2.627551 |
| C | -2.896037 | -0.354038 | -1.187126 |
| C | -3.227991 | -1.188925 | -0.096445 |
| C | -4.398993 | -1.953045 | -0.117572 |
| C | -5.278715 | -1.886554 | -1.211365 |
| C | -4.968662 | -1.040649 | -2.289111 |
| C | -3.790585 | -0.282801 | -2.283642 |
| C | 2.718607  | -0.126568 | -2.023629 |
| C | 4.185603  | -0.321357 | -1.669605 |
| C | 4.518810  | 1.016499  | -0.995132 |
| C | 3.243452  | 1.336158  | -0.214191 |
| H | -0.533065 | -1.380404 | 2.001916  |
| H | -2.029596 | -2.167127 | 3.832887  |
| H | -3.177818 | -0.505453 | 5.335196  |
| H | -2.796893 | 1.950953  | 4.963576  |
| H | -1.317984 | 2.732868  | 3.117417  |
| H | 1.618956  | 1.794401  | 3.363619  |
| H | 3.044626  | 3.843689  | 3.516500  |
| H | 2.932168  | 5.599618  | 1.722760  |
| H | 1.335892  | 5.297481  | -0.201667 |
| H | -0.108893 | 3.274481  | -0.323682 |
| H | 1.725802  | -0.550465 | 1.849019  |
| H | 3.938860  | -1.199682 | 2.804051  |
| H | 5.172277  | -3.199884 | 1.902330  |
| H | 4.136787  | -4.544728 | 0.046668  |
| H | 1.932176  | -3.882001 | -0.913188 |
| H | -0.409719 | -3.812830 | 1.178053  |
| H | -2.114436 | -5.475022 | 0.413884  |
| H | -3.090745 | -5.310291 | -1.894645 |
| H | -2.314988 | -3.448819 | -3.437964 |
| H | -0.602158 | -1.837105 | -2.667649 |
| H | -3.374919 | 2.430142  | -0.901137 |
| H | -2.968006 | 4.742678  | -1.769044 |
| H | -0.928003 | 5.243593  | -3.142087 |
| H | 0.672924  | 3.392663  | -3.707168 |
| H | 0.193442  | 1.051411  | -2.940495 |
| H | -2.551026 | -1.224135 | 0.766787  |

|   |           |           |           |
|---|-----------|-----------|-----------|
| H | -4.629123 | -2.604715 | 0.739213  |
| H | -6.201093 | -2.486412 | -1.222767 |
| H | -5.647923 | -0.977654 | -3.153780 |
| H | -3.538671 | 0.358158  | -3.142012 |
| H | 2.137652  | -1.066001 | -2.101875 |
| H | 2.594009  | 0.464263  | -2.960436 |
| H | 4.294539  | -1.164202 | -0.957079 |
| H | 4.809918  | -0.532349 | -2.559526 |
| H | 5.401944  | 0.957250  | -0.329966 |
| H | 4.719257  | 1.798062  | -1.757295 |
| H | 2.992101  | 2.412981  | -0.182705 |
| H | 3.274827  | 0.944224  | 0.820408  |

Conformation 33.

Multiplicity: 3

Charge: 0

E(B97-3c) = -2729.966379523576 Hartree

E(M06/def2-TZVP) = -2729.934747889639 Hartree

E(PBE - D3(BJ)/def2-TZVP) = -2728.976862559467 Hartree

E(PBE0 - D3(BJ)/def2-TZVP) = -2729.125272920965 Hartree

E(PBEh-3c) = -2726.116737702291 Hartree

E(PM6) = 93.19738 Kcal/mol

E(PM7) = 113.51464 Kcal/mol

E( $\omega$ B97X-V/def2-TZVP) = -2730.727523297464 Hartree

E(GFN1-xTB) = -120.620439160570 Hartree

E(GFN2-xTB) = -119.810560363668 Hartree

E(GFN-FF) = -16.973760565180 Hartree

Coordinates:

|   |           |           |           |
|---|-----------|-----------|-----------|
| O | 0.046472  | -0.065751 | -0.042627 |
| V | -1.758118 | 0.631859  | 0.737896  |
| N | 0.605700  | 1.727397  | -0.635731 |
| N | 1.067179  | -0.809936 | 1.438999  |
| N | -0.722648 | -1.369695 | -1.270465 |
| C | 0.170037  | -2.244425 | -1.903495 |
| C | 1.562349  | -1.982400 | -1.809542 |
| C | 2.503651  | -2.862651 | -2.350832 |
| C | 2.084908  | -4.019442 | -3.030652 |
| C | 0.709566  | -4.280358 | -3.148685 |
| C | -0.241061 | -3.413494 | -2.592570 |
| C | -2.100801 | -1.415687 | -1.592421 |
| C | -2.558937 | -1.025659 | -2.873006 |
| C | -3.929662 | -0.989781 | -3.161766 |
| C | -4.872122 | -1.345502 | -2.181000 |
| C | -4.426432 | -1.755593 | -0.913554 |
| C | -3.054671 | -1.801122 | -0.623410 |
| C | 2.470625  | -0.878102 | 1.470602  |
| C | 3.244046  | 0.052066  | 0.727566  |
| C | 4.639518  | -0.048211 | 0.685154  |
| C | 5.308702  | -1.056479 | 1.398839  |
| C | 4.553332  | -1.967505 | 2.155894  |
| C | 3.155438  | -1.889573 | 2.191791  |
| C | 0.316809  | -1.449804 | 2.451325  |
| C | 0.378589  | -1.014654 | 3.797375  |
| C | -0.469389 | -1.572362 | 4.762232  |
| C | -1.389348 | -2.577655 | 4.409168  |
| C | -1.433058 | -3.039676 | 3.084077  |
| C | -0.577982 | -2.491646 | 2.114331  |
| C | 0.380052  | 2.830023  | 0.208848  |
| C | -0.051160 | 4.083452  | -0.297885 |
| C | -0.380523 | 5.129469  | 0.572618  |
| C | -0.289914 | 4.960195  | 1.966845  |
| C | 0.156214  | 3.730764  | 2.478413  |
| C | 0.497925  | 2.681705  | 1.613045  |
| C | 1.342860  | 1.901123  | -1.822789 |
| C | 1.054098  | 1.102380  | -2.956118 |
| C | 1.846557  | 1.177397  | -4.109079 |
| C | 2.929509  | 2.067684  | -4.173349 |
| C | 3.213359  | 2.880864  | -3.061682 |
| C | 2.439970  | 2.798964  | -1.897899 |
| C | -2.601073 | 1.512391  | -0.076316 |
| C | -3.302662 | 2.398689  | 0.939763  |
| C | -3.525560 | 1.415423  | 2.097153  |
| C | -2.212412 | 0.640349  | 2.125669  |
| H | 1.938433  | -1.067968 | -1.316473 |
| H | 3.574316  | -2.629116 | -2.248831 |
| H | 2.823835  | -4.707879 | -3.466416 |
| H | 0.365995  | -5.182778 | -3.678416 |
| H | -1.313958 | -3.638928 | -2.676001 |
| H | -1.818801 | -0.738431 | -3.635256 |
| H | -4.266825 | -0.670999 | -4.160191 |
| H | -5.948411 | -1.309489 | -2.406971 |
| H | -5.154888 | -2.051032 | -0.142227 |
| H | -2.701718 | -2.120009 | 0.367259  |
| H | 2.735866  | 0.866206  | 0.190601  |
| H | 5.208519  | 0.685044  | 0.092754  |
| H | 6.405919  | -1.129334 | 1.369014  |
| H | 5.060204  | -2.765006 | 2.721594  |
| H | 2.575842  | -2.624159 | 2.769073  |
| H | 1.092136  | -0.220528 | 4.065120  |
| H | -0.420838 | -1.213101 | 5.801962  |

|   |           |           |           |
|---|-----------|-----------|-----------|
| H | -2.058797 | -3.006820 | 5.169656  |
| H | -2.129995 | -3.844066 | 2.801673  |
| H | -0.581951 | -2.857073 | 1.076650  |
| H | -0.133352 | 4.217476  | -1.387079 |
| H | -0.722248 | 6.090464  | 0.157361  |
| H | -0.551768 | 5.785484  | 2.645543  |
| H | 0.258027  | 3.589409  | 3.565887  |
| H | 0.874197  | 1.724032  | 2.006798  |
| H | 0.189646  | 0.423448  | -2.912911 |
| H | 1.605201  | 0.534881  | -4.969730 |
| H | 3.547493  | 2.130492  | -5.081274 |
| H | 4.061327  | 3.582715  | -3.095972 |
| H | 2.682397  | 3.423728  | -1.025434 |
| H | -1.937186 | 2.046220  | -0.780108 |
| H | -3.310380 | 0.873294  | -0.641922 |
| H | -2.636943 | 3.230806  | -1.248724 |
| H | -4.241796 | 2.828467  | 0.540941  |
| H | -3.735628 | 1.908244  | 3.065902  |
| H | -4.370900 | 0.734767  | 1.864554  |
| H | -2.303874 | -0.407305 | 2.469702  |
| H | -1.439030 | 1.153812  | 2.731717  |

## LUFCIZ

Conformation 2.

Multiplicity: 5

Charge: 0

E(B97-3c) = -3593.871077226790 Hartree

E(GFN1-xTB) = -169.715092985715 Hartree

E(GFN2-xTB) = -169.230178231737 Hartree

E(GFN-FF) = -24.136567205388 Hartree

E(M06/def2-TZVP) = -3593.616731544692 Hartree

E(PBE - D3(BJ)/def2-TZVP) = -3592.337878491573 Hartree

E(PBE0 - D3(BJ)/def2-TZVP) = -3592.631458288078 Hartree

E(PBEh-3c) = -3588.830996805323 Hartree

E(PM6) = 151.18855 Kcal/mol

E(PM7) = 51.26554 Kcal/mol

E( $\omega$ B97X-V/def2-TZVP) = -3596.387030838947 Hartree

Coordinates:

|    |           |           |           |
|----|-----------|-----------|-----------|
| Fe | -0.103815 | 0.531318  | -0.098951 |
| C  | -1.418516 | 0.004414  | 1.354142  |
| C  | -2.163119 | -1.012507 | 2.007383  |
| C  | -2.533755 | -0.830699 | 3.360032  |
| H  | -3.064790 | -1.645891 | 3.876794  |
| C  | -2.306579 | 0.382960  | 4.024428  |
| H  | -2.635499 | 0.508670  | 5.067231  |
| C  | -1.727343 | 1.458869  | 3.339293  |
| H  | -1.657034 | 2.439831  | 3.827556  |
| C  | -1.271989 | 1.271345  | 2.017006  |
| C  | -2.192504 | -2.192784 | 1.314992  |
| C  | -2.120872 | -3.426661 | 1.131880  |
| C  | -2.829095 | -4.523539 | 0.600154  |
| H  | -2.309820 | -5.484709 | 0.461991  |
| C  | -4.184453 | -4.417221 | 0.270796  |
| H  | -4.727996 | -5.286787 | -0.129404 |
| C  | -4.842688 | -3.193356 | 0.443351  |
| H  | -5.905836 | -3.107913 | 0.170323  |
| C  | -4.166191 | -2.067656 | 0.948806  |
| C  | -0.678797 | -3.614317 | 1.575436  |
| H  | -0.326264 | -2.626505 | 1.931718  |
| C  | 0.240780  | -4.025148 | 0.425323  |
| H  | 0.251701  | -3.301180 | -0.389428 |
| H  | -0.080029 | -5.021909 | -0.008604 |
| H  | 1.284161  | -4.173141 | 0.777330  |
| C  | -0.619167 | -4.588188 | 2.765750  |
| H  | -1.242020 | -4.225698 | 3.608522  |
| H  | 0.419294  | -4.709499 | 3.134501  |
| H  | -0.991994 | -5.594213 | 2.482459  |
| C  | -4.930787 | -0.753704 | 1.108812  |
| H  | -4.192144 | 0.034976  | 1.355988  |
| C  | -5.637424 | -0.324358 | -0.187837 |
| H  | -4.930735 | -0.278703 | -1.039554 |
| H  | -6.093414 | 0.679603  | -0.064827 |
| H  | -6.452323 | -1.023668 | -0.467178 |
| C  | -5.926554 | -0.825534 | 2.278843  |
| H  | -5.413273 | -1.064134 | 3.230831  |
| H  | -6.693078 | -1.609178 | 2.104006  |
| H  | -6.454311 | 0.142150  | 2.407623  |
| C  | -0.633259 | 2.331007  | 1.160008  |
| C  | -1.165047 | 2.489688  | -0.193189 |
| C  | -0.439249 | 3.316067  | -1.095965 |
| H  | -0.803990 | 3.417054  | -2.127318 |
| C  | 0.692613  | 4.019540  | -0.691625 |
| H  | 1.243262  | 4.638941  | -1.414534 |
| C  | 1.107483  | 3.970507  | 0.650513  |
| H  | 1.966264  | 4.578996  | 0.967491  |
| C  | 0.466784  | 3.152543  | 1.591413  |
| C  | -2.629202 | 2.145000  | -0.523700 |
| H  | -2.873722 | 1.181141  | -0.037889 |

|   |           |           |           |                                                            |
|---|-----------|-----------|-----------|------------------------------------------------------------|
| C | -3.536411 | 3.215443  | 0.109487  | E(GFN2-xTB) = -169.236440741096 Hartree                    |
| H | -3.393194 | 3.264140  | 1.207602  | E(GFN-FF) = -24.051237318642 Hartree                       |
| H | -4.603200 | 2.982818  | -0.088042 | E(M06/def2-TZVP) = -3593.612440974443 Hartree              |
| H | -3.317524 | 4.219445  | -0.310276 | E(PBE - D3(BJ)/def2-TZVP) = -3592.328706835875 Hartree     |
| C | -2.905341 | 1.981434  | -2.019513 | E(PBE0 - D3(BJ)/def2-TZVP) = -3592.632086238828 Hartree    |
| H | -2.228882 | 1.239239  | -2.485569 | E(PBEh-3c) = -3588.834590178223 Hartree                    |
| H | -2.799105 | 2.935046  | -2.575887 | E(PM6) = 175.76578 Kcal/mol                                |
| H | -3.945103 | 1.632153  | -2.175499 | E(PM7) = 62.98373 Kcal/mol                                 |
| C | 0.920157  | 3.195365  | 3.043694  | E( $\omega$ B97X-V/def2-TZVP) = -3596.392810185007 Hartree |
| H | 0.628078  | 2.232609  | 3.511006  |                                                            |
| C | 2.437041  | 3.342521  | 3.205013  | Coordinates:                                               |
| H | 2.982555  | 2.613624  | 2.581071  | Fe 0.147149 0.056866 0.408117                              |
| H | 2.729253  | 3.171738  | 4.260543  | C 1.956544 -0.213910 -0.499227                             |
| H | 2.787320  | 4.360218  | 2.934175  | C 2.526716 -0.614680 -1.742415                             |
| C | 0.196714  | 4.337760  | 3.786368  | C 3.879898 -0.320304 -2.025904                             |
| H | -0.904970 | 4.287276  | 3.679327  | H 4.300777 -0.647014 -2.989352                             |
| H | 0.515758  | 5.319601  | 3.379204  | C 4.708865 0.305040 -1.085454                              |
| H | 0.442000  | 4.321405  | 4.868260  | H 5.765305 0.500988 -1.322871                              |
| C | 1.458076  | -0.350770 | -0.970198 | C 4.198469 0.612069 0.179435                               |
| C | 2.638682  | -0.791302 | -0.296365 | H 4.858324 1.016641 0.962923                               |
| C | 3.371987  | -1.886145 | -0.805768 | C 2.839570 0.361336 0.465883                               |
| H | 4.268283  | -2.224577 | -0.262012 | C 1.861155 -1.535451 -2.728181                             |
| C | 2.997645  | -2.516401 | -2.000813 | C 1.251789 -1.058626 -3.919840                             |
| H | 3.570097  | -3.377966 | -2.376882 | C 0.791050 -1.995507 -4.865132                             |
| C | 1.938039  | -1.990462 | -2.749171 | H 0.323154 -1.622595 -5.795599                             |
| H | 1.701839  | -2.402485 | -3.742613 | C 0.899099 -3.372338 -4.636242                             |
| C | 1.183694  | -0.901384 | -2.257806 | H 0.519137 -4.087331 -5.382415                             |
| C | 3.294358  | -0.062850 | 0.852351  | C 1.494898 -3.835174 -3.457853                             |
| C | 3.123367  | -0.465837 | 2.202418  | H 1.590432 -4.918887 -3.287614                             |
| C | 3.957104  | 0.082001  | 3.197780  | C 2.000972 -2.934911 -2.500344                             |
| H | 3.835325  | -0.243665 | 4.242157  | C 1.117502 0.437902 -4.195596                              |
| C | 4.948177  | 1.014779  | 2.877013  | H 1.108632 0.946597 -3.207210                              |
| H | 5.601142  | 1.423112  | 3.663558  | C -0.182744 0.800925 -4.929147                             |
| C | 5.087519  | 1.443463  | 1.551819  | H -1.080149 0.475165 -4.368992                             |
| H | 5.855030  | 2.191684  | 1.300856  | H -0.225044 0.347698 -5.940119                             |
| C | 4.270723  | 0.925071  | 0.528798  | H -0.251737 1.896346 -5.075183                             |
| C | 2.129105  | -1.552792 | 2.578127  | C 2.333634 0.966065 -4.979396                              |
| H | 1.474825  | -1.703725 | 1.694952  | H 3.280465 0.782091 -4.437902                              |
| C | 1.235187  | -1.160676 | 3.762860  | H 2.246784 2.058957 -5.150117                              |
| H | 0.684487  | -0.220971 | 3.560475  | H 2.406426 0.469889 -5.969460                              |
| H | 1.821576  | -1.024316 | 4.694851  | C 2.782666 -3.476875 -1.305066                             |
| H | 0.480715  | -1.947655 | 3.963259  | H 2.939062 -2.635835 -0.603018                             |
| C | 2.877086  | -2.871017 | 2.844624  | C 2.034916 -4.572434 -0.536534                             |
| H | 3.461015  | -3.187214 | 1.957424  | H 1.062857 -4.203679 -0.156790                             |
| H | 2.172437  | -3.686928 | 3.100674  | H 2.635170 -4.913775 0.331795                              |
| H | 3.586165  | -2.758764 | 3.691019  | H 1.838541 -5.465259 -1.165894                             |
| C | 4.510669  | 1.370512  | -0.909890 | C 4.176093 -3.952567 -1.752850                             |
| H | 3.668979  | 0.982337  | -1.514084 | H 4.742093 -3.133489 -2.238972                             |
| C | 4.513700  | 2.898658  | -1.062545 | H 4.099913 -4.788351 -2.479112                             |
| H | 3.570450  | 3.338503  | -0.683082 | H 4.767442 -4.307660 -0.883617                             |
| H | 4.618815  | 3.179566  | -2.130842 | C 2.328235 0.616339 1.857664                               |
| H | 5.355998  | 3.371463  | -0.516270 | C 2.000741 -0.508904 2.686855                              |
| C | 5.800534  | 0.745829  | -1.468933 | C 1.619184 -0.268652 4.024807                              |
| H | 5.758722  | -0.360283 | -1.423096 | H 1.381913 -1.119584 4.676932                              |
| H | 6.689358  | 1.076928  | -0.892168 | C 1.581658 1.025740 4.545562                               |
| H | 5.953243  | 1.037226  | -2.528776 | H 1.280861 1.189999 5.591319                               |
| C | 0.175844  | -0.285551 | -3.194145 | C 1.942065 2.127694 3.743265                               |
| C | 0.495427  | 0.938167  | -3.866466 | H 1.925706 3.117192 4.174987                               |
| C | -0.380762 | 1.412115  | -4.860161 | C 2.328237 1.942373 2.404812                               |
| H | -0.145359 | 2.346073  | -5.389315 | C 2.244972 -1.948361 2.223625                              |
| C | -1.539052 | 0.705347  | -5.210220 | H 1.919530 -2.016818 1.164462                              |
| H | -2.201341 | 1.089841  | -6.001099 | C 3.752404 -2.265734 2.258298                              |
| C | -1.853844 | -0.479608 | -4.542416 | H 4.334074 -1.578178 1.615526                              |
| H | -2.774271 | -1.023391 | -4.803450 | H 3.933674 -3.300111 1.900768                              |
| C | -1.017575 | -0.983018 | -3.525380 | H 4.143894 -2.186086 3.294000                              |
| C | 1.796806  | 1.686049  | -3.583661 | C 1.459626 -3.001354 3.009161                              |
| H | 1.951913  | 1.643147  | -2.484436 | H 0.380112 -2.767184 3.042220                              |
| C | 2.994121  | 0.987407  | -4.257835 | H 1.828390 -3.109988 4.050324                              |
| H | 3.121037  | -0.053707 | -3.907194 | H 1.564195 -3.988994 2.519393                              |
| H | 3.935053  | 1.534510  | -4.043110 | C 2.739717 3.138114 1.548893                               |
| H | 2.856944  | 0.964728  | -5.358921 | H 3.705388 2.877245 1.067729                               |
| C | 1.775569  | 3.163483  | -3.997657 | C 1.714754 3.371699 0.432867                               |
| H | 0.877311  | 3.693879  | -3.627004 | H 1.597930 2.480647 -0.215176                              |
| H | 1.803582  | 3.281560  | -5.100856 | H 2.014269 4.217866 -0.216681                              |
| H | 2.668627  | 3.680613  | -3.593484 | H 0.730364 3.613152 0.870719                               |
| C | -1.431340 | -2.247741 | -2.787652 | C 2.960028 4.433076 2.338966                               |
| H | -0.757932 | -2.350540 | -1.912365 | H 3.690146 4.305102 3.163453                               |
| C | -2.862449 | -2.130579 | -2.252827 | H 2.010806 4.814569 2.769599                               |
| H | -2.976749 | -1.227326 | -1.623336 | H 3.347872 5.223202 1.665281                               |
| H | -3.117537 | -3.007017 | -1.630313 | C -1.849413 0.408012 0.210194                              |
| H | -3.609249 | -2.073087 | -3.071619 | C -2.472750 1.670077 -0.023315                             |
| C | -1.267297 | -3.509868 | -3.649656 | C -3.828686 1.743406 -0.418573                             |
| H | -0.219395 | -3.648592 | -3.980954 | H -4.273471 2.734646 -0.597627                             |
| H | -1.904526 | -3.460334 | -4.557476 | C -4.616322 0.591850 -0.532315                             |
| H | -1.566522 | -4.410162 | -3.074379 | H -5.673543 0.667098 -0.829307                             |
|   |           |           |           | C -4.050696 -0.649063 -0.220817                            |
|   |           |           |           | H -4.661160 -1.565077 -0.253777                            |
|   |           |           |           | C -2.688175 -0.743997 0.129273                             |
|   |           |           |           | C -1.841386 2.999805 0.280288                              |
|   |           |           |           | C -1.366693 3.847987 -0.756497                             |
|   |           |           |           | C -1.013820 5.174381 -0.439586                             |

Conformation 25.  
Multiplicity: 5  
Charge: 0  
E(B97-3c) = -3593.864730263530 Hartree  
E(GFN1-xTB) = -169.715152983924 Hartree

|   |           |           |           |   |           |           |           |
|---|-----------|-----------|-----------|---|-----------|-----------|-----------|
| H | -0.662312 | 5.846308  | -1.236464 | C | -1.656742 | -0.849838 | 3.745631  |
| C | -1.080177 | 5.648371  | 0.875087  | H | -1.041310 | -1.005646 | 4.658404  |
| H | -0.792680 | 6.686341  | 1.103362  | C | -3.099650 | -0.626982 | 4.240191  |
| C | -1.497854 | 4.792541  | 1.901582  | H | -3.483914 | -1.520298 | 4.772278  |
| H | -1.538984 | 5.165836  | 2.935919  | H | -3.784321 | -0.406102 | 3.398169  |
| C | -1.897087 | 3.470389  | 1.625412  | C | -3.136489 | 0.232356  | 4.941435  |
| C | -1.240549 | 3.354710  | -2.196184 | H | -1.111907 | 0.418104  | 3.071409  |
| H | -1.262252 | 2.244218  | -2.160456 | H | -0.118360 | 0.246987  | 2.594927  |
| C | 0.091073  | 3.777730  | -2.837897 | H | -0.967524 | 1.216916  | 3.824934  |
| H | 0.958089  | 3.387953  | -2.271346 | H | -1.794450 | 0.813114  | 2.294953  |
| H | 0.192026  | 4.880352  | -2.896758 | C | -2.269365 | -3.839234 | -0.452450 |
| H | 0.163105  | 3.396139  | -3.873997 | H | -2.432548 | -2.848018 | -0.921534 |
| C | -2.432662 | 3.813207  | -3.054357 | C | -1.289944 | -4.608844 | -1.346892 |
| H | -3.392374 | 3.455966  | -2.633912 | H | -0.317039 | -4.089974 | -1.410440 |
| H | -2.346973 | 3.420326  | -4.088596 | H | -1.702433 | -4.703643 | -2.372174 |
| H | -2.477675 | 4.920910  | -3.111760 | H | -1.097764 | -5.635988 | -0.973111 |
| C | -2.469736 | 2.603070  | 2.743983  | C | -3.633763 | -4.550633 | -0.401641 |
| H | -2.389869 | 1.550149  | 2.407455  | H | -4.371806 | -3.967814 | 0.182079  |
| C | -1.697419 | 2.716694  | 4.062484  | H | -3.543950 | -5.552937 | 0.067331  |
| H | -0.622010 | 2.504234  | 3.914971  | H | -4.039813 | -4.687653 | -1.425098 |
| H | -2.088908 | 1.986676  | 4.799622  | C | -2.501720 | 1.540213  | -1.794443 |
| H | -1.793123 | 3.722595  | 4.521335  | C | -2.224998 | 1.183638  | -3.143406 |
| C | -3.964113 | 2.909382  | 2.950200  | C | -2.090827 | 2.209321  | -4.097789 |
| H | -4.540343 | 2.755556  | 2.017081  | H | -1.892947 | 1.952109  | -5.148798 |
| H | -4.109154 | 3.962415  | 3.271149  | C | -2.184255 | 3.557462  | -3.729073 |
| H | -4.396062 | 2.250576  | 3.732267  | H | -2.053512 | 4.344251  | -4.488040 |
| C | -2.186211 | -2.102814 | 0.521647  | C | -2.434340 | 3.900280  | -2.396440 |
| C | -2.235190 | -2.438576 | 1.909726  | H | -2.506945 | 4.961674  | -2.113332 |
| C | -1.880678 | -3.738029 | 2.314760  | C | -2.626304 | 2.905382  | -1.417866 |
| H | -1.932494 | -4.008072 | 3.380813  | C | -2.164514 | -0.281897 | -3.570400 |
| C | -1.480543 | -4.698396 | 1.378489  | H | -1.873153 | -0.866843 | -2.672268 |
| H | -1.195578 | -5.709246 | 1.707570  | C | -3.551739 | -0.778900 | -4.017995 |
| C | -1.457308 | -4.368947 | 0.020787  | H | -4.303209 | -0.668365 | -3.212715 |
| H | -1.169499 | -5.129485 | -0.722204 | H | -3.514060 | -3.849894 | -4.307359 |
| C | -1.819368 | -3.084617 | -0.439830 | H | -3.904793 | -0.199766 | -4.896612 |
| C | -2.799018 | -1.460420 | 2.938330  | C | -1.120990 | -0.552350 | -4.663509 |
| H | -2.895000 | -0.477859 | 2.437211  | H | -0.127582 | -0.143517 | -4.393093 |
| C | -4.216019 | -1.893019 | 3.354626  | H | -1.416825 | -0.103943 | -5.634766 |
| H | -4.882324 | -1.974467 | 2.472820  | H | -1.013768 | -1.643624 | -4.832708 |
| H | -4.662148 | -1.156602 | -4.054878 | C | -3.052206 | 3.304049  | -0.006021 |
| H | -4.205261 | -2.881259 | 3.860271  | H | -3.019364 | 2.387449  | 0.618143  |
| C | -1.888785 | -1.254739 | 4.154663  | C | -2.103560 | 4.322036  | 0.633159  |
| H | -0.910433 | -0.830742 | 3.856791  | H | -1.064365 | 3.948083  | 0.636416  |
| H | -1.699526 | -2.200488 | 4.704160  | H | -2.404983 | 4.534328  | 1.680297  |
| H | -2.356518 | -0.547247 | 4.869475  | H | -2.101424 | 5.289863  | 0.089589  |
| C | -1.893713 | -2.921540 | -1.958165 | C | -4.502739 | 3.819681  | 0.002966  |
| H | -1.050065 | -3.527323 | -2.354763 | H | -5.208987 | 3.063283  | -0.391509 |
| C | -3.194933 | -3.556354 | -2.489701 | H | -4.601914 | 4.730698  | -0.623326 |
| H | -3.315237 | -4.603203 | -2.146569 | H | -4.822389 | 4.081256  | 1.033113  |
| H | -3.201382 | -3.551492 | -3.599304 | C | 2.018914  | 0.223592  | 0.108859  |
| H | -4.078580 | -2.982077 | -2.143428 | C | 2.652397  | 1.483677  | -0.106315 |
| C | -1.724032 | -1.517157 | -2.541821 | C | 4.059915  | 1.586426  | -0.213720 |
| H | -0.852644 | -0.994682 | -2.102435 | H | 4.501314  | 2.585388  | -0.349829 |
| H | -2.616129 | -0.882040 | -2.394114 | C | 4.881830  | 0.457769  | -0.175852 |
| H | -1.540572 | -1.608945 | -3.628152 | H | 5.972760  | 0.553183  | -0.289937 |

Conformation 27.

Multiplicity: 5

Charge: 0

E(B97-3c) = -3593.855891483977 Hartree

E(GFN1-xTB) = -169.710964105228 Hartree

E(GFN2-xTB) = -169.232663529372 Hartree

E(GFN-FF) = -24.044367125238 Hartree

E(M06/def2-TZVP) = -3593.603482345096 Hartree

E(PBE - D3(BJ)/def2-TZVP) = -3592.318520362066 Hartree

E(PBE0 - D3(BJ)/def2-TZVP) = -3592.623967292348 Hartree

E(PBEh-3c) = -3588.825210403138 Hartree

E(PM6) = 194.26395 Kcal/mol

E(PM7) = 69.19441 Kcal/mol

E( $\omega$ B97X-V/def2-TZVP) = -3596.391768741060 Hartree

Coordinates:

|    |           |           |           |   |          |           |           |
|----|-----------|-----------|-----------|---|----------|-----------|-----------|
| Fe | 0.034229  | -0.339716 | 0.155920  | H | 0.850298 | 2.908607  | 4.263429  |
| C  | -2.019316 | -0.332926 | -0.047390 | C | 3.237171 | 3.255072  | 2.834146  |
| C  | -2.638612 | -1.270936 | 0.836359  | H | 4.009379 | 2.834995  | 2.161233  |
| C  | -4.039653 | -1.353540 | 0.984613  | H | 3.379704 | 2.806957  | 3.839856  |
| H  | -4.456400 | -2.084667 | 1.694125  | H | 3.415774 | 4.347491  | 2.919264  |
| C  | -4.884806 | -0.546421 | 0.218213  | C | 2.315223 | 2.622699  | -2.789440 |
| H  | -5.978807 | -0.620519 | 0.317857  | H | 2.517114 | 1.575906  | -2.482175 |
| C  | -4.310846 | 0.345938  | -0.690516 | C | 1.252158 | 2.574697  | -3.890579 |
| H  | -4.953497 | 0.977186  | -1.323088 | H | 0.310023 | 2.137496  | -3.515475 |
| C  | -2.907459 | 0.482557  | -0.810433 | H | 1.606439 | 1.965718  | -4.748364 |
| C  | -1.872165 | -2.320438 | 1.591122  | H | 1.011572 | 3.584818  | -4.282866 |
| C  | -1.501301 | -2.150888 | 2.954987  | C | 3.633958 | 3.209972  | -3.324788 |
| C  | -1.019228 | -3.271763 | 3.661692  | H | 4.436055 | 3.183508  | -2.561678 |
| H  | -0.745440 | -3.150496 | 4.721655  | H | 3.499942 | 4.267376  | -3.634911 |
| C  | -0.889762 | -4.522637 | 3.051603  | H | 3.986502 | 2.640629  | -4.209835 |
| C  | -0.505814 | -5.379496 | 3.626336  | C | 2.428326 | -2.280840 | 0.584783  |
| C  | -1.238254 | -4.676654 | 1.706246  | C | 2.497766 | -2.614046 | 1.972533  |
| H  | -1.135547 | -5.661346 | 1.226710  | C | 2.296131 | -3.948404 | 2.364718  |
| C  | -1.743318 | -3.596545 | 0.962135  | H | 2.348275 | -4.212115 | 3.431356  |

|   |          |           |           |   |           |           |           |
|---|----------|-----------|-----------|---|-----------|-----------|-----------|
| C | 2.052280 | -4.947849 | 1.417482  | H | 1.936291  | 2.354233  | -0.337926 |
| H | 1.902361 | -5.990116 | 1.738492  | C | 2.544557  | 4.186520  | 0.609668  |
| C | 1.986788 | -4.616120 | 0.061650  | H | 1.513194  | 4.493823  | 0.862316  |
| H | 1.794164 | -5.403171 | -0.684476 | H | 2.833149  | 4.703590  | -0.328410 |
| C | 2.168746 | -3.290787 | -0.384365 | H | 3.218912  | 4.541806  | -1.416543 |
| C | 2.919823 | -1.579390 | 3.015828  | C | 4.071241  | 2.326964  | -0.098547 |
| H | 2.810632 | -0.577099 | 2.553995  | H | 4.240455  | 1.237768  | -0.166365 |
| C | 2.053843 | -1.596809 | 4.281454  | H | 4.868793  | 2.763656  | 0.538136  |
| H | 0.985643 | -1.459786 | 4.037335  | H | 4.194909  | 2.748343  | -1.115966 |
| H | 2.363158 | -0.781840 | 4.967322  | C | -0.778969 | 1.316695  | 4.027212  |
| H | 2.150739 | -2.550606 | 4.840413  | H | -1.130927 | 2.368543  | 3.962979  |
| C | 4.405934 | -1.758845 | 3.377270  | C | -1.732047 | 0.469568  | 3.170215  |
| H | 5.054406 | -1.667828 | 2.485153  | H | -1.783086 | 0.828687  | 2.124575  |
| H | 4.586064 | -2.756586 | 3.829537  | H | -2.759208 | 0.501649  | 3.585318  |
| H | 4.723878 | -0.988764 | 4.110046  | H | -1.406861 | -0.585204 | 3.157990  |
| C | 2.150590 | -3.066077 | -1.898203 | C | -0.890455 | -0.897209 | 5.497735  |
| H | 1.641973 | -3.966448 | -2.306670 | H | -0.249367 | 1.510359  | 6.162572  |
| C | 1.347668 | -1.854905 | -2.395405 | H | -0.621202 | -0.170187 | 5.636556  |
| H | 0.374939 | -1.747667 | -1.859513 | H | -1.938228 | 1.013977  | 5.839006  |
| H | 1.109648 | -1.972006 | -3.470569 | C | -0.004666 | -1.942814 | -0.141227 |
| H | 1.900949 | -0.904567 | -2.275369 | C | -0.734295 | -2.935092 | 0.582295  |
| C | 3.566530 | -3.065482 | -2.507615 | C | -1.005732 | -4.189959 | -0.014561 |
| H | 4.139072 | -3.962027 | -2.195894 | H | -1.564487 | -4.938231 | 0.568284  |
| H | 4.137161 | -2.167519 | -2.199117 | C | -0.533976 | -4.517903 | -1.289503 |
| H | 3.508034 | -3.064130 | -3.615849 | H | -0.752699 | -5.504083 | -1.726548 |

Conformation 28.

Multiplicity: 5

Charge: 0

E(B97-3c) = -3593.859555228174 Hartree

E(GFN1-xTB) = -169.710873146138 Hartree

E(GFN2-xTB) = -169.235896181251 Hartree

E(GFN-FF) = -24.044662880788 Hartree

E(M06/def2-TZVP) = -3593.609560879721 Hartree

E(PBE - D3(BJ)/def2-TZVP) = -3592.323967382504 Hartree

E(PBE0 - D3(BJ)/def2-TZVP) = -3592.628407848730 Hartree

E(PBEh-3c) = -3588.829809006462 Hartree

E(PM6) = 182.74979 Kcal/mol

E(PM7) = 67.32603 Kcal/mol

E( $\omega$ B97X-V/def2-TZVP) = -3596.386623643481 Hartree

Coordinates:

|    |           |           |           |   |           |           |           |
|----|-----------|-----------|-----------|---|-----------|-----------|-----------|
| Fe | 0.273286  | 0.079639  | 0.045997  | H | -5.335293 | -1.469609 | 0.776698  |
| C  | -0.500405 | 1.983685  | 0.119988  | C | -4.435679 | -4.077244 | 1.269816  |
| C  | -1.398008 | 2.776463  | -0.653267 | H | -3.780165 | -4.943091 | 1.050637  |
| C  | -1.957892 | 3.959192  | -0.112348 | H | -5.210323 | -4.026484 | 0.476988  |
| H  | -2.662100 | 4.534831  | -0.732843 | H | -4.950733 | -4.283727 | 2.231072  |
| C  | -1.614336 | 4.422236  | 1.161430  | C | 1.333041  | -3.032151 | 2.710899  |
| H  | -2.056512 | 5.350016  | 1.555391  | H | 1.528255  | -2.298656 | 1.900227  |
| C  | -0.659524 | 3.716905  | 1.899403  | C | 2.265145  | -2.693638 | 3.879658  |
| H  | -0.303227 | 4.105076  | 2.866508  | H | 2.018716  | -1.716267 | 4.331898  |
| C  | -0.119259 | 2.518362  | 1.388849  | H | 3.314052  | -2.644258 | 3.525847  |
| C  | -1.723275 | 2.616603  | -2.114425 | H | 2.225544  | -3.469043 | 4.672754  |
| C  | -2.908357 | 1.980166  | -2.576690 | C | 1.684421  | -4.432814 | 2.171808  |
| C  | -3.292360 | 2.159316  | -3.920188 | H | 1.130115  | -4.684644 | 1.248836  |
| H  | -4.215031 | 1.671561  | -4.273452 | H | 1.452152  | -5.206906 | 2.932498  |
| C  | -2.528305 | 2.928557  | -4.805907 | H | 2.768338  | -4.497492 | 1.943613  |
| H  | -2.854618 | 3.060383  | -5.848836 | C | 1.513170  | -1.431901 | -2.105520 |
| C  | -1.336765 | 3.507526  | -4.359404 | C | 2.815063  | -1.282656 | -1.529270 |
| H  | -0.721220 | 4.095181  | -5.058282 | C | 3.756223  | -0.460245 | -2.179247 |
| C  | -0.919890 | 3.367408  | -3.020983 | H | 4.767669  | -0.360465 | -1.758324 |
| C  | -3.751899 | 1.040225  | -1.721128 | C | 3.445545  | 0.184679  | -3.380247 |
| H  | -4.613855 | 0.758080  | -2.364823 | H | 4.189813  | 0.831276  | -3.869884 |
| C  | -4.348056 | 1.645402  | -0.438799 | C | 2.199782  | -0.032297 | -3.982234 |
| H  | -4.808591 | 2.634509  | -0.633414 | H | 1.980600  | 0.433740  | -4.954519 |
| H  | -3.587052 | 1.778396  | 0.353531  | C | 1.228781  | -0.852188 | -3.377852 |
| H  | -5.135778 | 0.976045  | -0.038611 | C | 3.276248  | -2.195517 | -0.395804 |
| C  | -2.972936 | -0.252130 | -1.433852 | H | 2.369501  | -2.591733 | 0.096005  |
| H  | -2.573515 | -0.700966 | -2.364012 | C | 4.019728  | -3.400705 | -1.001716 |
| H  | -3.612737 | -1.005259 | -0.936496 | H | 3.384616  | -3.929266 | -1.740419 |
| H  | -2.107808 | -0.058430 | -0.761603 | H | 4.298443  | -4.125567 | -0.208929 |
| C  | 0.360784  | 4.063845  | -2.565945 | H | 4.948237  | -3.080261 | -1.518757 |
| H  | 0.531134  | 3.783747  | -1.508809 | C | 4.106980  | -1.501075 | 0.684672  |
| C  | 1.585245  | 3.582722  | -3.358514 | H | 3.524070  | -0.704147 | 1.185048  |
| H  | 1.713517  | 2.486695  | -3.265393 | H | 5.037044  | -1.047177 | 0.283439  |
| H  | 2.508799  | 4.070046  | -2.981788 | H | 4.413446  | -2.231422 | 1.460098  |
| H  | 1.501548  | 3.823290  | -4.439164 | C | -0.049571 | -1.175993 | -4.140470 |
| C  | 0.215978  | 5.593523  | -2.611002 | H | -0.752647 | -1.646511 | -3.422650 |
| H  | -0.634814 | 5.932373  | -1.986724 | C | -0.726343 | 0.069646  | -4.716528 |
| H  | 0.040965  | 5.954957  | -3.645888 | H | -0.881315 | 0.836671  | -3.938235 |
| H  | 1.135368  | 6.086537  | -2.232347 | H | -1.715032 | -0.184527 | -5.147397 |
| C  | 0.954964  | 1.848819  | 2.193034  | H | -0.126408 | 0.528610  | -5.528937 |
| C  | 2.307857  | 1.924036  | 1.729543  | C | 0.236990  | -2.196882 | -5.258623 |
| C  | 3.329393  | 1.415542  | 2.558654  | H | 0.704905  | -3.123949 | -4.873236 |
| H  | 4.375542  | 1.473283  | 2.229598  | H | 0.928015  | -1.766388 | -6.013083 |
| C  | 3.036868  | 0.863219  | 3.807452  | H | -0.701486 | -2.476633 | -5.780163 |
| H  | 3.848946  | 0.471391  | 4.438842  |   |           |           |           |
| C  | 1.713144  | 0.816451  | 4.264725  |   |           |           |           |
| H  | 1.506804  | 0.399733  | 5.259254  |   |           |           |           |
| C  | 0.653054  | 1.309276  | 3.484731  |   |           |           |           |
| C  | 2.674723  | 2.660757  | 0.435373  |   |           |           |           |

Conformation 29.

Multiplicity: 5

Charge: 0

E(B97-3c) = -3593.858900479013 Hartree

```

E(GFN1-xTB) = -169.706134784175 Hartree
E(GFN2-xTB) = -169.221632009004 Hartree
E(GFN-FF) = -24.131474225878 Hartree
E(M06/def2-TZVP) = -3593.604869074244 Hartree
E(PBE - D3(BJ)/def2-TZVP) = -3592.326692080129 Hartree
E(PBE0 - D3(BJ)/def2-TZVP) = -3592.618860379635 Hartree
E(PBEh-3c) = -3588.816441902036 Hartree
E(PM6) = 155.92226 Kcal/mol
E(PM7) = 58.16683 Kcal/mol
E(ωB97X-V/def2-TZVP) = -3596.371327932491 Hartree

Coordinates:
Fe 0.301122 0.343081 -0.113376
C -0.506948 0.423135 1.702542
C -1.893170 0.569453 2.020188
C -2.409493 -0.056559 3.176670
H -3.484027 0.042679 3.398849
C -1.574773 -0.760149 4.057430
H -1.998043 -1.251649 4.946744
C -0.191959 -0.764224 3.839494
H 0.485092 -1.215699 4.581496
C 0.350823 -0.160720 2.682982
C -2.859539 1.504286 1.326192
C -3.815889 1.054050 0.377667
C -4.868161 1.910168 -0.004971
H -5.620565 1.549625 -0.723035
C -4.976695 3.203804 0.512514
H -5.809460 3.856611 0.209140
C -4.002260 3.668189 1.402353
H -4.073987 4.692533 1.799157
C -2.943238 2.840154 1.821432
C -3.776849 -0.354720 -0.194196
H -2.816857 -0.805657 0.121053
C -3.809244 -0.353026 -1.729848
H -2.931658 0.178153 -2.146673
H -4.725400 0.130617 -2.125993
H -3.787554 -1.387032 -2.123814
C -4.910013 -1.208541 0.399821
H -4.839478 -1.252316 1.505264
H -4.871398 -2.245932 0.011077
H -5.904423 -0.787408 0.143418
C -1.967804 3.371700 2.865106
H -1.131860 2.649932 2.926360
C -1.370575 4.731059 2.473096
H -0.876691 4.676392 1.483167
H -0.614858 5.052248 3.219105
H -2.140932 5.528397 2.428322
C -2.627567 3.426008 4.253927
H -2.995749 2.426680 4.559346
H -3.491377 4.123255 4.261792
H -1.903678 3.770431 5.021043
C 1.854884 -0.055611 2.596157
C 2.490845 1.197982 2.877655
C 3.894365 1.242068 2.968003
H 4.391404 2.196486 3.190059
C 4.674920 0.090322 2.805428
H 5.770588 0.148470 2.894738
C 4.054440 -1.126029 2.516905
H 4.667148 -2.028040 2.369364
C 2.652675 -1.216657 2.397738
C 1.681396 2.459815 3.165751
H 0.833067 2.461499 2.444865
C 1.100893 2.421261 4.592830
H 0.431243 1.554222 4.744034
H 0.519675 3.342041 4.802874
H 1.919478 2.358179 5.339566
C 2.460533 3.766697 2.967757
H 2.985935 3.803339 1.993642
H 3.218769 3.921528 3.763410
H 1.765450 4.628497 3.012202
C 2.035853 -2.560096 2.039557
H 0.966826 -2.378890 1.810782
C 2.680219 -3.144865 0.777393
H 2.615396 -2.429924 -0.065105
H 2.163400 -4.072073 0.469300
H 3.750057 -3.394441 0.933444
C 2.102663 -3.560147 3.205276
H 1.588738 -3.175379 4.107994
H 3.154840 -3.778737 3.483697
H 1.623229 -4.519351 2.919779
C 0.076856 -0.864573 -1.737048
C -0.178139 -2.149315 -2.295685
H -0.780968 -2.226664 -3.574130
C -1.022446 -3.220677 -3.982268
C -1.002371 -1.085750 -4.357273
H -1.439733 -1.186550 -5.362204
C -0.594195 0.170561 -3.893577
H -0.659172 1.043346 -4.556355
C -0.073619 0.288969 -2.587334
C 0.390076 -3.462861 -1.797686
C -0.274717 -4.390632 -0.944841

C 0.323705 -5.644565 -0.700130
H -0.200441 -6.352101 -0.038161
C 1.540292 -6.010901 -1.283076
H 1.979204 -7.000082 -1.082487
C 2.189899 -5.101913 -2.121151
H 3.148157 -5.380011 -2.585187
C 1.640470 -3.832932 -2.386120
C -1.624997 -4.145082 -0.279831
H -1.853343 -5.082896 0.271749
C -2.759780 -3.965111 -1.299655
H -2.764311 -4.794893 -2.034804
H -2.661487 -3.017094 -1.859394
H -3.743580 -3.957987 -0.788095
C -1.564908 -3.026519 0.767892
H -0.862379 -3.285354 1.583203
H -2.558367 -2.851221 1.225983
H -1.217389 -2.072423 0.326294
C 2.403629 -2.912343 -3.340746
H 1.943772 -1.906624 -3.283373
C 3.884708 -2.762111 -2.955635
H 4.003447 -2.453184 -1.898633
H 4.372759 -1.999196 -3.595730
H 4.446365 -3.708941 -3.092488
C 2.266766 -3.388979 -4.797584
H 1.205313 -3.431237 -5.109982
H 2.697952 -4.403613 -4.927941
C 2.799349 -2.701963 -5.487420
H 0.381083 1.583791 -1.961064
C 1.693472 1.584060 -1.312093
H 2.038167 2.708686 -0.511582
C 3.003752 2.704984 0.011932
C 1.199137 3.814834 -0.407710
H 1.481144 4.661399 0.235125
C 0.012893 3.866003 -1.159666
H -0.607417 4.772207 -1.117462
C -0.410395 2.788168 -1.949232
H 2.814649 0.639222 -1.780534
H 2.388923 -0.376960 -1.886784
C 3.273058 1.091849 -3.178638
H 2.436241 1.066235 -3.904966
H 4.077607 0.428877 -3.557514
H 3.667385 2.128955 -3.146637
C 3.990832 0.540483 -0.807604
H 3.661539 0.282304 0.216985
H 4.570230 1.484929 -0.750389
H 4.692034 -0.248281 -1.143948
C -1.658303 2.950440 -2.805409
H -2.069132 1.938215 -2.994532
C -2.761716 3.774086 -2.131333
H -2.960502 3.422611 -1.104082
H -3.705544 3.692744 -2.706814
H -2.504694 4.825542 -2.083535
C -1.283345 3.580975 -4.162630
H -0.473591 3.030353 -4.681543
H -0.923056 4.620264 -4.015494
H -2.164621 3.618274 -4.835683

Conformation 30.
Multiplicity: 5
Charge: 0
E(B97-3c) = -3593.859560649872 Hartree
E(GFN1-xTB) = -169.715344862263 Hartree
E(GFN2-xTB) = -169.241268869526 Hartree
E(GFN-FF) = -24.040024822118 Hartree
E(M06/def2-TZVP) = -3593.609797125480 Hartree
E(PBE - D3(BJ)/def2-TZVP) = -3592.322026353394 Hartree
E(PBE0 - D3(BJ)/def2-TZVP) = -3592.626453187046 Hartree
E(PBEh-3c) = -3588.822948795612 Hartree
E(PM6) = 168.20229 Kcal/mol
E(PM7) = 59.27699 Kcal/mol
E(ωB97X-V/def2-TZVP) = -3596.382656836694 Hartree

Coordinates:
Fe -0.318772 -0.220240 -0.159804
C -1.410219 1.440588 -0.732775
C -1.344691 2.859027 -0.814902
C -2.503296 3.613610 -1.121625
H -2.414567 4.709454 -1.189796
C -3.754872 3.007890 -1.276690
H -4.648789 3.618343 -1.475565
C -3.855706 1.616662 -1.160762
H -4.831832 1.116019 -1.252398
C -2.696125 0.852022 -0.928917
C -0.123193 3.672603 -0.503715
C 0.879624 3.891575 -1.487387
H 1.956276 4.742500 -1.177278
C 2.735665 4.928374 -1.930618
C 2.052953 5.359213 0.077999
H 2.907926 6.015544 0.303865
C 1.053700 5.150792 1.035559
H 1.125386 5.648554 2.015529

```



|   |           |           |           |                                                            |           |           |           |
|---|-----------|-----------|-----------|------------------------------------------------------------|-----------|-----------|-----------|
| C | -0.053047 | 4.324036  | 0.758640  | H                                                          | 0.487035  | 0.252831  | 5.617973  |
| C | 0.740654  | 3.276192  | -2.877242 | C                                                          | 1.699961  | 1.837303  | 4.782740  |
| H | 0.218666  | 2.306140  | -2.740334 | H                                                          | 1.618452  | 2.471514  | 5.678847  |
| C | 2.077063  | 2.998057  | -3.576290 | C                                                          | 2.409582  | 2.284939  | 3.667042  |
| H | 2.757310  | 2.391462  | -2.946996 | H                                                          | 2.878916  | 3.281766  | 3.678933  |
| H | 2.604876  | 3.936103  | -3.845964 | C                                                          | 2.528741  | 1.497666  | 2.502087  |
| H | 1.904963  | 2.447449  | -4.523536 | C                                                          | 0.553414  | -1.645489 | 3.639143  |
| C | -0.156096 | 4.154689  | -3.770399 | H                                                          | 0.206851  | -1.865459 | 2.606334  |
| H | -1.161416 | 4.289591  | -3.327403 | C                                                          | 1.617128  | -2.699607 | 4.002837  |
| H | -0.285138 | 3.694279  | -4.772103 | H                                                          | 2.458470  | -2.696429 | 3.286098  |
| H | 0.295242  | 5.159167  | -3.909570 | H                                                          | 1.173934  | -3.716617 | 4.007274  |
| C | -1.169295 | 4.191875  | 1.792952  | H                                                          | 2.026581  | -2.499625 | 5.014672  |
| H | -1.933040 | 3.512118  | 1.367998  | C                                                          | -0.650433 | -1.791070 | 4.579053  |
| C | -0.683727 | 3.556269  | 3.099540  | H                                                          | -1.406558 | -0.997595 | 4.422424  |
| H | -0.218069 | 2.570931  | 2.915037  | H                                                          | -0.344892 | -1.758059 | 5.645564  |
| H | -1.528845 | 3.411700  | 3.803972  | H                                                          | -1.141514 | -2.772177 | 4.416470  |
| H | 0.072259  | 4.186886  | 3.609696  | C                                                          | 3.344825  | 2.111299  | 1.359092  |
| C | -1.862995 | 5.541833  | 2.039516  | H                                                          | 3.077775  | 3.189930  | 1.386674  |
| H | -2.253662 | 5.974142  | 1.096273  | C                                                          | 4.859630  | 2.026485  | 1.632878  |
| H | -1.166425 | 6.282920  | 2.483932  | H                                                          | 5.117101  | 2.413261  | 2.639182  |
| H | -2.714121 | 5.419634  | 2.740995  | H                                                          | 5.421455  | 2.620336  | 0.882215  |
| C | -2.795639 | -0.647203 | -0.883609 | H                                                          | 5.215868  | 0.978986  | 1.566702  |
| C | -2.882643 | -1.340750 | 0.366167  | C                                                          | 3.033440  | 1.644141  | -0.067559 |
| C | -3.019325 | -2.746491 | 0.332244  | H                                                          | 1.941353  | 1.596509  | -0.248873 |
| H | -3.131141 | -3.283346 | 1.285984  | H                                                          | 3.470148  | 0.655352  | -0.299506 |
| C | -3.048197 | -3.454914 | -0.869180 | H                                                          | 3.451876  | 2.377666  | -0.783980 |
| H | -3.134797 | -4.550479 | -0.860331 |                                                            |           |           |           |
| C | -2.975141 | -2.767440 | -2.086594 |                                                            |           |           |           |
| H | -3.010420 | -3.333590 | -3.027413 | Conformation 32.                                           |           |           |           |
| C | -2.866242 | -1.367795 | -2.120997 | Multiplicity: 5                                            |           |           |           |
| C | -3.082530 | -0.689083 | 1.741797  | Charge: 0                                                  |           |           |           |
| H | -2.890819 | -1.510727 | 2.465481  | E(B97-3c) = -3593.854300309898 Hartree                     |           |           |           |
| C | -2.154218 | 0.461484  | 2.146202  | E(GFN1-xTB) = -169.710364367265 Hartree                    |           |           |           |
| H | -1.073145 | 0.241645  | 1.970044  | E(GFN2-xTB) = -169.235688379871 Hartree                    |           |           |           |
| H | -2.239734 | 0.648439  | 3.235894  | E(GFN-FF) = -24.039690456829 Hartree                       |           |           |           |
| H | -2.394834 | 1.405054  | 1.627103  | E(M06/def2-TZVP) = -3593.603649160272 Hartree              |           |           |           |
| C | -4.555725 | -0.271597 | 1.915204  | E(PBE - D3(BJ)/def2-TZVP) = -3592.318681547038 Hartree     |           |           |           |
| H | -5.241938 | -1.115217 | 1.704039  | E(PBE0 - D3(BJ)/def2-TZVP) = -3592.622719349496 Hartree    |           |           |           |
| H | -4.810088 | 0.559867  | 1.227961  | E(PBEh-3c) = -3588.820667468501 Hartree                    |           |           |           |
| H | -4.740152 | 0.075596  | 2.952486  | E(PM6) = 187.56521 Kcal/mol                                |           |           |           |
| C | -2.921093 | -0.629908 | -3.458258 | E(PM7) = 71.21472 Kcal/mol                                 |           |           |           |
| H | -2.456109 | 0.366454  | -3.303101 | E( $\omega$ B97X-V/def2-TZVP) = -3596.380427035978 Hartree |           |           |           |
| C | -2.167280 | -1.333693 | -4.594646 |                                                            |           |           |           |
| H | -1.128375 | -1.577722 | -4.312750 | Coordinates:                                               |           |           |           |
| H | -2.139576 | -0.681329 | -5.490653 | Fe                                                         | -0.164081 | 0.233145  | -0.039849 |
| H | -2.663628 | -2.278661 | -4.897067 | C                                                          | -1.912397 | -0.828594 | -0.292444 |
| C | -4.384292 | -0.398079 | -3.885386 | C                                                          | -2.307083 | -2.102350 | -0.803714 |
| H | -4.951182 | 0.175317  | -3.129713 | C                                                          | -3.642566 | -2.550115 | -0.651125 |
| H | -4.903239 | -1.366899 | -4.038906 | H                                                          | -3.903362 | -3.551007 | -1.028300 |
| H | -4.425072 | 0.164955  | -4.840358 | C                                                          | -4.628932 | -1.751245 | -0.066475 |
| C | 1.359129  | -1.254044 | 0.428188  | H                                                          | -5.661218 | -2.120637 | 0.030997  |
| C | 1.818175  | -2.350451 | -0.368311 | C                                                          | -4.284108 | -0.470555 | 0.375150  |
| C | 3.143723  | -2.829286 | -0.274351 | H                                                          | -5.041839 | 0.192624  | 0.822024  |
| H | 3.455029  | -3.661742 | -0.924140 | C                                                          | -2.949611 | -0.023425 | 0.273374  |
| C | 4.037873  | -2.293065 | 0.657634  | C                                                          | -1.487227 | -3.065261 | -1.627626 |
| H | 5.068058  | -2.673611 | 0.730728  | C                                                          | -0.652411 | -4.064365 | -1.052667 |
| C | 3.578233  | -1.304022 | 1.531161  | C                                                          | -0.161888 | -5.097507 | -1.876260 |
| H | 4.234251  | -0.924400 | 2.329100  | H                                                          | 0.476605  | -5.872562 | -1.422759 |
| C | 2.268722  | -0.781695 | 1.420453  | C                                                          | -0.464802 | -5.159507 | -3.240531 |
| C | 0.914325  | -3.196216 | -1.223519 | H                                                          | -0.075293 | -5.982507 | -3.858972 |
| C | 0.751337  | -2.993605 | -2.621190 | C                                                          | -1.252590 | -4.156005 | -3.810238 |
| C | 0.042283  | -3.958394 | -3.365730 | H                                                          | -1.478147 | -4.185689 | -4.887596 |
| H | -0.072280 | -3.809978 | -4.451164 | C                                                          | -1.773699 | -3.109974 | -3.024905 |
| C | -0.501165 | -5.096795 | -2.760691 | C                                                          | -0.182711 | -4.059315 | 0.397773  |
| H | -1.045446 | -5.837963 | -3.366228 | H                                                          | 0.342419  | -5.030160 | 0.533645  |
| C | -0.341832 | -5.287496 | -1.384418 | C                                                          | -1.286732 | -4.008389 | 1.466494  |
| H | -0.756760 | -6.190253 | -0.909141 | H                                                          | -2.079007 | -4.756506 | 1.264016  |
| C | 0.367840  | -4.358239 | -0.600415 | H                                                          | -1.768191 | -3.014682 | 1.521071  |
| C | 1.356198  | -1.817529 | -3.386935 | H                                                          | -0.854742 | -4.229497 | 2.463994  |
| H | 0.912370  | -1.879332 | -4.404625 | C                                                          | 0.872481  | -2.962899 | 0.601335  |
| C | 2.879689  | -1.934056 | -3.577413 | H                                                          | 1.649089  | -2.989762 | -0.187667 |
| H | 3.155482  | -2.919351 | -4.003456 | H                                                          | 1.370199  | -3.058730 | 1.583243  |
| H | 3.415838  | -1.811348 | -2.617053 | H                                                          | 0.407636  | -1.950967 | 0.571354  |
| H | 3.241475  | -1.146041 | -4.269849 | C                                                          | -2.645206 | -2.054844 | -3.701907 |
| C | 0.976759  | -0.439357 | -2.829514 | H                                                          | -2.929056 | -1.319894 | -2.924548 |
| H | -0.112261 | -0.368946 | -2.612507 | H                                                          | -1.867141 | -1.286918 | -4.781268 |
| H | 1.208617  | 0.357148  | -3.562461 | H                                                          | -0.956333 | -0.816800 | -4.362716 |
| H | 1.540983  | -0.197442 | -1.906342 | H                                                          | -2.496396 | -0.482435 | -5.215380 |
| C | 0.646025  | -4.679281 | 0.869116  | H                                                          | -1.867141 | -1.950277 | -5.614515 |
| H | 1.113062  | -3.783819 | 1.320946  | C                                                          | -3.946504 | -2.652860 | -4.259293 |
| C | -0.618547 | -4.979769 | 1.683760  | H                                                          | -4.533722 | -3.153117 | -3.463731 |
| H | -1.292993 | -4.104038 | 1.698574  | H                                                          | -3.742869 | -3.403312 | -5.051406 |
| H | -0.350313 | -5.222757 | 2.732534  | H                                                          | -4.581625 | -1.859613 | -4.704976 |
| H | -1.186523 | -5.843746 | 1.279826  | C                                                          | -2.663473 | 1.344286  | 0.834564  |
| C | 1.664538  | -5.826947 | 0.986122  | C                                                          | -2.680431 | 2.560110  | 0.005265  |
| H | 2.602805  | -5.586576 | 0.449225  | C                                                          | -2.540526 | 3.770234  | 0.620221  |
| H | 1.262031  | -6.769288 | 0.559611  | H                                                          | -2.554293 | 4.669474  | -0.015488 |
| H | 1.918489  | -6.015884 | 2.049764  | C                                                          | -2.425936 | 3.902590  | 2.005053  |
| C | 1.921570  | 0.212665  | 2.488354  | H                                                          | -2.330767 | 4.901035  | 2.457921  |
| C | 1.161743  | -0.240624 | 3.612865  | C                                                          | -2.446584 | 2.761897  | 2.818234  |
| C | 1.060350  | 0.591184  | 4.742921  | H                                                          | -2.370270 | 2.874994  | 3.908106  |
|   |           |           |           | C                                                          | -2.577106 | 1.480472  | 2.259518  |

|   |           |           |           |                                                            |           |           |           |
|---|-----------|-----------|-----------|------------------------------------------------------------|-----------|-----------|-----------|
| C | -3.032636 | 2.526869  | -1.485132 | E(B97-3c) = -3593.863636730184 Hartree                     |           |           |           |
| H | -2.752323 | 3.549103  | -1.820604 | E(GFN1-xTB) = -169.708943157087 Hartree                    |           |           |           |
| C | -2.291197 | 1.546870  | -2.400357 | E(GFN2-xTB) = -169.225720563659 Hartree                    |           |           |           |
| H | -1.212350 | 1.477809  | -2.150151 | E(GFN-FF) = -24.126324792384 Hartree                       |           |           |           |
| H | -2.355184 | 1.882174  | -3.455313 | E(M06/def2-TZVP) = -3593.609934844182 Hartree              |           |           |           |
| H | -2.708727 | 0.527208  | -2.342426 | E(PBE - D3(BJ)/def2-TZVP) = -3592.330664601461 Hartree     |           |           |           |
| C | -4.557284 | 2.412929  | -1.683947 | E(PBE0 - D3(BJ)/def2-TZVP) = -3592.624614097380 Hartree    |           |           |           |
| H | -5.101800 | 3.164320  | -1.078068 | E(PBEh-3c) = -3588.823340892234 Hartree                    |           |           |           |
| H | -4.919795 | 1.406766  | -1.394277 | E(PM6) = 151.96419 Kcal/mol                                |           |           |           |
| H | -4.819446 | 2.572068  | -2.750373 | E(PM7) = 55.64619 Kcal/mol                                 |           |           |           |
| C | -2.664509 | 0.248087  | 3.154593  | E( $\omega$ B97X-V/def2-TZVP) = -3596.376997650897 Hartree |           |           |           |
| H | -3.422513 | -0.422735 | 2.700129  |                                                            |           |           |           |
| C | -1.330801 | -0.507188 | 3.173184  | Coordinates:                                               |           |           |           |
| H | -1.002060 | -0.796215 | 2.152509  | Fe                                                         | -0.156784 | 0.504572  | -0.386650 |
| H | -1.411848 | -1.441452 | 3.764633  | C                                                          | 0.423675  | -0.946465 | -1.685348 |
| H | -0.540933 | 0.118080  | 3.622414  | C                                                          | 1.228397  | -2.098916 | -1.902727 |
| C | -3.115958 | 0.548115  | 4.589244  | C                                                          | 0.834961  | -3.030941 | -2.890923 |
| H | -4.057842 | 1.132277  | 4.615744  | H                                                          | 1.427625  | -3.951050 | -3.014557 |
| H | -2.342906 | 1.110229  | 5.153260  | C                                                          | -0.257574 | -2.789203 | -3.736509 |
| H | -3.286520 | -0.400904 | 5.136018  | H                                                          | -0.521856 | -3.521962 | -4.514126 |
| C | 1.840243  | 0.478776  | 0.370793  | C                                                          | -0.976196 | -1.593457 | -3.629695 |
| C | 2.591570  | 0.449364  | 1.592925  | H                                                          | -1.761730 | -1.365485 | -4.336515 |
| C | 4.000249  | 0.355034  | 1.565366  | C                                                          | -0.645899 | -0.676454 | -2.607912 |
| H | 4.545968  | 0.335210  | 2.521009  | C                                                          | 2.566034  | -2.378007 | -1.261117 |
| C | 4.711581  | 0.346828  | 0.359821  | C                                                          | 2.679433  | -3.052099 | -0.018396 |
| H | 5.810214  | 0.280376  | 0.360237  | C                                                          | 3.952612  | -3.444186 | 0.441959  |
| C | 4.007955  | 0.488338  | -0.837380 | H                                                          | 4.037372  | -3.974737 | 1.402985  |
| H | 4.548747  | 0.570871  | -1.792207 | C                                                          | 5.103077  | -3.194597 | -0.311765 |
| C | 2.595323  | 0.552755  | -0.839090 | H                                                          | 6.088828  | -3.520891 | 0.053930  |
| C | 2.001886  | 0.711312  | 2.951819  | C                                                          | 4.992171  | -2.515819 | -1.530393 |
| C | 1.970123  | -0.280909 | 3.970930  | H                                                          | 5.898792  | -2.306457 | -2.118147 |
| C | 1.470328  | 0.061984  | 5.243760  | C                                                          | 3.741957  | -2.092318 | -2.018346 |
| H | 1.432985  | -0.703464 | 6.033710  | C                                                          | 1.450943  | -3.457515 | 0.780208  |
| C | 1.003275  | 1.351593  | 5.516307  | H                                                          | 0.576221  | -3.005625 | 0.274161  |
| H | 0.591701  | 1.593507  | 6.508409  | C                                                          | 1.480591  | -2.928326 | 2.221364  |
| C | 1.095317  | 2.342602  | 4.530520  | H                                                          | 1.523038  | -1.821537 | 2.241396  |
| H | 0.783927  | 3.371210  | 4.765852  | H                                                          | 2.355101  | -3.315613 | 2.783964  |
| C | 1.627886  | 2.055083  | 3.260060  | H                                                          | 0.570373  | -3.233133 | 2.774346  |
| C | 2.501954  | -1.693018 | 3.747475  | C                                                          | 1.278182  | -4.986077 | 0.729109  |
| H | 2.671863  | -1.810516 | 2.657564  | H                                                          | 1.196179  | -5.343120 | -0.317480 |
| C | 1.513287  | -2.782235 | 4.194468  | H                                                          | 0.365785  | -5.303951 | 1.272469  |
| H | 0.522348  | -2.655376 | 3.719223  | H                                                          | 2.142535  | -5.504638 | 1.193130  |
| H | 1.363178  | -2.772952 | 5.293540  | C                                                          | 3.683989  | -1.364498 | -3.358959 |
| H | 1.896273  | -3.788724 | 3.927502  | H                                                          | 2.676884  | -0.911211 | -3.440346 |
| C | 3.856845  | -1.886843 | 4.453982  | C                                                          | 4.709946  | -0.224205 | -3.460533 |
| H | 4.609597  | -1.148801 | 4.114400  | H                                                          | 4.655536  | 0.456412  | -2.588752 |
| H | 4.260702  | -2.901617 | 4.258184  | H                                                          | 4.528267  | 0.374621  | -4.376695 |
| H | 3.749243  | -1.770308 | 5.552526  | H                                                          | 5.749311  | -0.607776 | -3.522819 |
| C | 1.989688  | 3.197530  | 2.313608  | C                                                          | 3.843119  | -2.341665 | -4.537261 |
| H | 2.043492  | 2.773699  | 1.293615  | H                                                          | 3.056127  | -3.120027 | -4.525915 |
| C | 0.985357  | 4.350144  | 2.277645  | H                                                          | 4.827294  | -2.853371 | -4.496255 |
| H | -0.021656 | 3.998077  | 1.989750  | H                                                          | 3.778711  | -1.804144 | -5.506100 |
| H | 1.308078  | 5.112710  | 1.539648  | C                                                          | -1.339220 | 0.633749  | -2.349913 |
| H | 0.901585  | 4.868839  | 3.255503  | C                                                          | -0.492695 | 1.806592  | -2.157062 |
| C | 3.399006  | 3.711282  | 2.668046  | C                                                          | -1.087573 | 2.948557  | -1.546445 |
| H | 4.148615  | 2.896551  | 2.637768  | H                                                          | -0.444376 | 3.823746  | -1.365762 |
| H | 3.412008  | 4.147714  | 3.688686  | C                                                          | -2.445490 | 3.001116  | -1.248570 |
| H | 3.720651  | 4.496672  | 1.952970  | H                                                          | -2.867819 | 3.894247  | -0.765949 |
| C | 1.939683  | 0.792967  | -2.171422 | C                                                          | -3.283652 | 1.940617  | -1.641138 |
| C | 2.054621  | -0.181477 | -3.206433 | H                                                          | -4.367361 | 2.029146  | -1.483775 |
| C | 1.543375  | 0.112972  | -4.484644 | C                                                          | -2.769462 | 0.771015  | -2.215902 |
| H | 1.620344  | -0.641067 | -5.282546 | C                                                          | 0.857102  | 2.068316  | -2.865683 |
| C | 0.945344  | 1.346299  | -4.757877 | H                                                          | 0.793477  | 3.149465  | -3.120444 |
| H | 0.549725  | 1.559077  | -5.762837 | C                                                          | 2.077108  | 1.923098  | -1.946860 |
| C | 0.859241  | 2.314034  | -3.750972 | H                                                          | 1.943133  | 2.496998  | -1.008901 |
| H | 0.405706  | 3.287550  | -3.982431 | H                                                          | 2.994643  | 2.305511  | -2.438371 |
| C | 1.350731  | 2.068504  | -2.454830 | H                                                          | 2.250053  | 0.859509  | -1.683984 |
| C | 2.755717  | -1.519622 | -2.993054 | H                                                          | 1.030284  | 1.336415  | -4.200548 |
| H | 2.986468  | -1.607773 | -1.912291 | C                                                          | 0.146173  | 1.472512  | -4.855074 |
| C | 1.856883  | -2.701816 | -3.368940 | H                                                          | 1.185524  | 0.250092  | -4.069817 |
| H | 0.898101  | -2.665234 | -2.821484 | H                                                          | 1.917151  | 1.740652  | -4.729953 |
| H | 2.349969  | -3.663994 | -3.125096 | C                                                          | -3.721948 | -0.281809 | -2.764588 |
| H | 1.620930  | -2.717937 | -4.452750 | H                                                          | -3.228719 | -1.270396 | -2.657345 |
| C | 4.087223  | -1.580067 | -3.763243 | C                                                          | -5.070749 | -0.356946 | -2.042854 |
| H | 4.772023  | -0.756195 | -3.480403 | H                                                          | -4.946370 | -0.463539 | -0.951139 |
| H | 3.918005  | -1.509268 | -4.857981 | H                                                          | -5.646934 | -1.230711 | -2.408820 |
| H | 4.607860  | -2.539902 | -3.566473 | H                                                          | -5.692902 | 0.541147  | -2.237018 |
| C | 1.347284  | 3.194606  | -1.418732 | C                                                          | -3.956866 | -0.012728 | -4.267733 |
| H | 1.074254  | 2.736815  | -0.442918 | H                                                          | -3.012718 | 0.104818  | -4.835192 |
| C | 2.757070  | 3.796208  | -1.265155 | H                                                          | -4.529379 | 0.928833  | -4.397762 |
| H | 3.501527  | 3.035405  | -0.964271 | H                                                          | -4.541975 | -0.834683 | -4.729364 |
| H | 2.756214  | 4.595473  | -0.496407 | C                                                          | -0.438306 | 0.589948  | 1.597255  |
| H | 3.090217  | 4.243395  | -2.224734 | C                                                          | -1.411868 | -0.169940 | 2.318846  |
| C | 0.333423  | 4.309818  | -1.693956 | C                                                          | -1.166040 | -0.536480 | 3.660844  |
| H | -0.684795 | 3.914650  | -1.866876 | H                                                          | -1.912913 | -1.150583 | 4.188910  |
| H | 0.618647  | 4.921536  | -2.575032 | C                                                          | -0.015448 | -0.102483 | 4.333026  |
| H | 0.285077  | 4.992759  | -0.823234 | H                                                          | 0.166307  | -0.405193 | 5.375456  |
|   |           |           |           | C                                                          | 0.858009  | 0.781611  | 3.690131  |
|   |           |           |           | H                                                          | 1.703614  | 1.220538  | 4.241252  |
|   |           |           |           | C                                                          | 0.648905  | 1.145417  | 2.340898  |
|   |           |           |           | C                                                          | -2.800362 | -0.488744 | 1.816426  |

Conformation 6.  
Multiplicity: 5  
Charge: 0

|   |           |           |           |   |           |           |           |
|---|-----------|-----------|-----------|---|-----------|-----------|-----------|
| C | -3.137356 | -1.759607 | 1.281793  | H | -4.649537 | -0.611819 | -3.449664 |
| C | -4.490814 | -2.079456 | 1.056409  | C | -2.553702 | -0.123866 | -3.155136 |
| H | -4.750356 | -3.071959 | 0.656978  | C | 0.458904  | -1.994857 | -4.738190 |
| C | -5.507245 | -1.163637 | 1.343239  | H | 1.162123  | -1.453509 | -4.074360 |
| H | -6.560856 | -1.431169 | 1.169626  | C | 0.803436  | -1.608103 | -6.186963 |
| C | -5.173281 | 0.102172  | 1.838253  | H | 0.712772  | -0.516120 | -6.346104 |
| H | -5.973403 | 0.824681  | 2.059102  | H | 0.123000  | -2.110993 | -6.905407 |
| C | -3.833964 | 0.458392  | 2.084801  | H | 1.842474  | -1.905746 | -6.438334 |
| C | -2.079019 | -2.825174 | 1.046488  | C | 0.686188  | -3.498487 | -4.509256 |
| H | -1.095213 | -2.329879 | 1.171154  | H | 0.445291  | -3.793386 | -3.469022 |
| C | -2.130624 | -3.412534 | -0.371545 | H | 1.745820  | -3.762447 | -4.704690 |
| H | -1.941055 | -2.633692 | -1.135448 | H | 0.063707  | -4.120125 | -5.185234 |
| H | -3.112909 | -3.879612 | -0.590045 | C | -2.879478 | 1.089848  | -2.299038 |
| H | -1.359004 | -4.197685 | -0.500130 | H | -1.913820 | 1.488282  | -1.930737 |
| C | -2.197927 | -3.921018 | 2.120475  | C | -3.541561 | 2.175579  | -3.166315 |
| H | -2.103180 | -3.495633 | 3.139488  | H | -2.895982 | 2.460206  | -4.021677 |
| H | -1.410696 | -4.691063 | 1.995661  | H | -3.749128 | 3.087427  | -2.571068 |
| H | -3.181517 | -4.431267 | 2.059519  | H | -4.507640 | 1.820230  | -3.580829 |
| C | -3.532675 | 1.870784  | 2.730320  | C | -3.743941 | 0.750917  | -1.075185 |
| H | -2.452748 | 2.000171  | 2.585549  | H | -3.228878 | 0.043727  | -0.397729 |
| C | -4.300653 | 2.970405  | 2.087480  | H | -4.714785 | 0.299674  | -1.367032 |
| H | -4.137990 | 3.002548  | 0.993242  | H | -3.966809 | 1.663119  | -0.486386 |
| H | -3.964312 | 3.936955  | 2.515791  | C | 2.718224  | 0.167062  | -0.462969 |
| H | -5.393088 | 2.900920  | 2.268769  | C | 2.539765  | -1.228427 | -0.062598 |
| C | -3.789254 | 1.755023  | 4.247243  | C | 2.978317  | -1.605791 | 1.238570  |
| H | -3.177805 | 0.968905  | 4.730698  | H | 2.806201  | -2.636698 | 1.575995  |
| H | -4.856738 | 1.538827  | 4.461740  | C | 3.648713  | -0.711510 | 2.066192  |
| H | -3.532588 | 2.724792  | 4.721576  | H | 3.968729  | -1.023345 | 3.071040  |
| C | 1.529542  | 2.217675  | 1.754869  | C | 3.958775  | 0.579314  | 1.601299  |
| C | 2.918521  | 1.989856  | 1.544997  | H | 4.551197  | 1.243989  | 2.243579  |
| C | 3.725317  | 3.039595  | 1.060556  | C | 3.518460  | 1.044776  | 0.355720  |
| H | 4.798068  | 2.860587  | 0.894223  | C | 2.285158  | -2.337097 | -1.106416 |
| C | 3.184753  | 4.294517  | 0.776856  | H | 1.418475  | -2.044045 | -1.731947 |
| H | 3.825393  | 5.100532  | 0.387169  | C | 3.508767  | -2.422755 | -2.036720 |
| C | 1.821843  | 4.527142  | 1.002716  | H | 3.679600  | -1.467521 | -2.570921 |
| H | 1.411541  | 5.526964  | 0.804892  | H | 3.360790  | -3.217393 | -2.796192 |
| C | 0.979567  | 3.519451  | 1.508473  | H | 4.425207  | -2.663242 | -1.458525 |
| C | 3.577628  | 0.647678  | 1.837587  | C | 1.961576  | -3.701110 | -0.493809 |
| H | 2.770255  | -0.093093 | 2.006538  | H | 1.133673  | -3.644819 | 0.237651  |
| C | 4.419264  | 0.148157  | 0.658042  | H | 2.840533  | -4.148080 | 0.015125  |
| H | 3.813395  | 0.067434  | -0.263335 | H | 1.654582  | -4.406711 | -1.291166 |
| H | 4.824196  | -0.858442 | 0.871087  | C | 3.854952  | 2.468395  | -0.081377 |
| H | 5.279949  | 0.815980  | 0.448101  | H | 4.195996  | 2.418195  | -1.134256 |
| C | 4.431271  | 0.713340  | 3.117128  | C | 2.605699  | 3.356806  | -0.029580 |
| H | 3.839184  | 1.032319  | 3.997465  | H | 1.784913  | 2.952872  | -0.648384 |
| H | 5.266107  | 1.435194  | 2.997735  | H | 2.828337  | 4.380489  | -0.392458 |
| H | 4.872216  | -0.279769 | 3.341280  | H | 2.239249  | 3.433877  | 1.010567  |
| C | -0.462398 | 3.861652  | 1.885444  | C | 4.995713  | 3.115941  | 0.713780  |
| H | -1.095677 | 3.024662  | 1.521454  | H | 5.910429  | 2.489681  | 0.726258  |
| C | -0.615513 | 3.942940  | 3.417683  | H | 4.700246  | 3.319477  | 1.763785  |
| H | -0.353082 | 2.989669  | 3.912214  | H | 5.256657  | 4.091750  | 0.257987  |
| H | -1.661200 | 4.191435  | 3.691602  | C | -0.789921 | 0.199170  | 1.564624  |
| H | 0.041992  | 4.736949  | 3.828487  | C | -1.293616 | 1.486772  | 1.932946  |
| C | -0.998077 | 5.158085  | 1.264551  | C | -2.597009 | 1.606440  | 2.463219  |
| H | -0.854375 | 5.203361  | 0.167614  | H | -2.973630 | 2.607465  | 2.727625  |
| H | -0.512652 | 6.055217  | 1.702029  | C | -3.393166 | 0.475947  | 2.693232  |
| H | -2.084122 | 5.247903  | 1.466459  | H | -4.409891 | 0.586909  | 3.099924  |

Conformation 9.

Multiplicity: 5

Charge: 0

E(B97-3c) = -3593.865199182437 Hartree  
E(GFN1-xTB) = -169.710101482010 Hartree  
E(GFN2-xTB) = -169.224817520193 Hartree  
E(GFN-FF) = -24.132752866128 Hartree  
E(M06/def2-TZVP) = -3593.612487956287 Hartree  
E(PBE - D3(BJ)/def2-TZVP) = -3592.333150682348 Hartree  
E(PBE0 - D3(BJ)/def2-TZVP) = -3592.626205992720 Hartree  
E(PBEh-3c) = -3588.824782696111 Hartree  
E(PM6) = 152.41249 Kcal/mol  
E(PM7) = 53.08478 Kcal/mol  
E( $\omega$ B97X-V/def2-TZVP) = -3596.378915123636 Hartree

Coordinates:

|    |           |           |           |   |           |           |           |
|----|-----------|-----------|-----------|---|-----------|-----------|-----------|
| Fe | 0.577094  | -0.169639 | 0.162694  | H | -0.375267 | 4.941777  | -1.513206 |
| C  | 0.666207  | 0.170487  | -1.829836 | H | -1.520853 | 3.865096  | -2.359072 |
| C  | -0.018708 | 0.348229  | -3.061099 | C | -2.805635 | 4.539620  | -0.023316 |
| C  | 0.574513  | 1.157036  | -4.057097 | H | -3.359661 | 4.299899  | 0.906406  |
| H  | 0.013029  | 1.354796  | -4.983969 | H | -3.500318 | 4.406811  | -0.877750 |
| C  | 1.888420  | 1.633338  | -3.925771 | H | -2.529276 | 5.613545  | 0.019603  |
| H  | 2.341913  | 2.219452  | -4.739610 | C | 0.513452  | 1.907086  | 4.200253  |
| C  | 2.650667  | 1.289666  | -2.802544 | H | 0.152692  | 0.948636  | 3.781870  |
| H  | 3.718442  | 1.548938  | -2.768714 | C | 1.958887  | 1.686507  | 4.664618  |
| C  | 2.038590  | 0.586743  | -1.742113 | H | 2.612643  | 1.415507  | 3.813069  |
| C  | -1.217469 | -0.457327 | -3.493004 | H | 2.002219  | 0.862966  | 5.406540  |
| C  | -0.959900 | -1.557111 | -4.368584 | H | 2.385347  | 2.585933  | 5.155358  |
| C  | -2.047126 | -2.259375 | -4.921521 | C | -0.407204 | 2.270828  | 5.379139  |
| H  | -1.855150 | -3.099149 | -5.606852 | H | -1.462422 | 2.351335  | 5.050894  |
| C  | -3.367258 | -1.924486 | -4.598060 | H | -0.113705 | 3.244307  | 5.824341  |
| H  | -4.205457 | -2.489484 | -5.033811 | H | -0.354864 | 1.499434  | 6.174820  |
| C  | -3.611741 | -0.874408 | -3.707462 | C | -1.021617 | -2.355219 | 1.869839  |
|    |           |           |           | C | -1.523295 | -3.273517 | 0.906582  |

|   |           |           |           |   |           |           |           |
|---|-----------|-----------|-----------|---|-----------|-----------|-----------|
| C | -1.215755 | -4.643287 | 1.031407  | H | -0.674043 | 1.677329  | 4.528708  |
| H | -1.618861 | -5.355562 | 0.296644  | C | -1.980425 | -1.509550 | 3.853700  |
| C | -0.390005 | -5.104548 | 2.058383  | H | -1.895119 | -2.242817 | 3.027201  |
| H | -0.156072 | -6.176823 | 2.144051  | H | -3.036654 | -1.180101 | 3.896484  |
| C | 0.160848  | -4.190764 | 2.965752  | H | -1.768522 | -2.033953 | 4.808100  |
| H | 0.827464  | -4.560455 | 3.757156  | C | -2.508342 | 2.015167  | -0.728295 |
| C | -0.143285 | -2.817829 | 2.900878  | C | -2.496344 | 2.235409  | -2.139242 |
| C | -2.359823 | -2.808336 | -0.278011 | C | -3.714622 | 2.136045  | -2.837522 |
| H | -2.216163 | -1.711071 | -0.365878 | H | -3.721268 | 2.302062  | -3.923466 |
| C | -1.864974 | -3.430120 | -1.588714 | C | -4.914059 | 1.832829  | -2.185142 |
| H | -0.787606 | -3.227466 | -1.740624 | H | -5.852737 | 1.765152  | -2.755657 |
| H | -2.414510 | -3.006628 | -2.447472 | C | -4.910332 | 1.609958  | -0.805874 |
| H | -2.011610 | -4.529612 | -1.611985 | H | -5.854611 | 1.367539  | -0.294904 |
| C | -3.862822 | -3.068168 | -0.086535 | C | -3.723391 | 1.688016  | -0.052964 |
| H | -4.260530 | -2.542354 | 0.802599  | C | -1.222102 | 2.606806  | -2.891444 |
| H | -4.065675 | -4.152581 | 0.037545  | H | -0.392404 | 2.603721  | -2.397892 |
| H | -4.426430 | -2.713275 | -0.973671 | C | -0.913225 | 4.111510  | -2.789714 |
| C | 0.415101  | -1.871885 | 3.961971  | H | 0.026531  | 4.345931  | -3.330015 |
| H | 0.654407  | -0.920214 | 3.442288  | H | -0.784549 | 4.444706  | -1.743688 |
| C | -0.634330 | -1.563780 | 5.047553  | H | -1.729654 | 4.714665  | -3.239692 |
| H | -1.526623 | -1.059851 | 4.632072  | C | -1.237152 | 2.171680  | -4.362943 |
| H | -0.203860 | -0.902635 | 5.827339  | H | -1.492112 | 1.099491  | -4.473674 |
| H | -0.965345 | -2.500795 | 5.541642  | H | -0.234761 | 2.319483  | -4.809140 |
| C | 1.703765  | -2.376347 | 4.625466  | H | -1.953651 | 2.769387  | -4.965244 |
| H | 2.456764  | -2.705249 | 3.883463  | C | -3.799689 | 1.450195  | -1.454434 |
| H | 1.509462  | -3.229354 | 5.308264  | H | -2.762348 | 1.389955  | 1.839645  |
| H | 2.155893  | -1.569736 | 5.236466  | C | -4.509594 | 0.130685  | 1.803737  |

## ONEHAS

Conformation 12.

Multiplicity: 3

Charge: 0

E(B97-3c) = -3245.807407571001 Hartree

E(M06/def2-TZVP) = -3245.833553992144 Hartree

E(PBE - D3(BJ)/def2-TZVP) = -3244.546696525168 Hartree

E(PBE0 - D3(BJ)/def2-TZVP) = -3244.794277672185 Hartree

E(PBEh-3c) = -3241.122784359298 Hartree

E(PM6) = -144.03455 Kcal/mol

E(PM7) = -168.29481 Kcal/mol

E( $\omega$ B97X-V/def2-TZVP) = -3246.878545832495 Hartree

E(GFN1-xTB) = -165.443257451535 Hartree

E(GFN2-xTB) = -162.842394260921 Hartree

E(GFN-FF) = -22.329415705169 Hartree

Coordinates:

|   |           |           |           |   |           |           |           |
|---|-----------|-----------|-----------|---|-----------|-----------|-----------|
| V | -0.120290 | 0.464668  | -0.061726 | H | 0.005194  | -3.488890 | -6.597809 |
| O | 0.294920  | -2.666341 | 0.201537  | C | 2.127884  | 1.157053  | -1.632775 |
| O | -1.899268 | -3.336947 | 0.535816  | C | 2.026449  | 2.427028  | -1.015805 |
| N | 0.762403  | 0.846123  | 1.666870  | H | 1.036634  | 2.812922  | -0.735170 |
| N | -1.286121 | 2.079985  | 0.028479  | C | 3.164242  | 3.206607  | -0.759095 |
| N | 0.984390  | 0.337146  | -1.714138 | H | 3.041091  | 4.176166  | -0.250247 |
| N | -1.406749 | -0.905059 | 0.212079  | C | 4.444823  | 1.586430  | -1.158639 |
| H | -2.409831 | -0.696484 | 0.165737  | C | 4.537031  | 1.546069  | -1.832968 |
| C | 0.847573  | 2.108425  | 2.171137  | H | 5.524760  | 1.189511  | -2.168617 |
| C | 0.075944  | 3.186209  | 1.701326  | C | 3.417265  | 0.743219  | -2.059499 |
| H | 0.265409  | 4.154179  | 2.184760  | H | 3.530633  | -0.233317 | -2.549292 |
| C | -0.997257 | 3.165850  | 0.776787  | C | 5.677590  | 3.603751  | -0.867862 |
| C | 1.824741  | 2.381028  | 3.291854  | H | 6.291280  | 3.133155  | -0.068838 |
| H | 1.650289  | 1.715012  | 4.159952  | H | 5.419027  | 4.625385  | -0.527353 |
| H | 1.760760  | 3.431307  | 3.628477  | H | 6.330164  | 3.694889  | -1.760387 |
| H | 2.860844  | 2.178600  | 2.950770  | C | 0.353765  | -4.087379 | 0.496224  |
| C | -1.804220 | 4.441130  | 0.659345  | C | -1.143805 | -4.544462 | 0.242732  |
| H | -2.619531 | 4.360213  | -0.080383 | C | 0.784696  | -4.235321 | 1.957192  |
| H | -1.140416 | 5.278841  | 0.362864  | H | 1.744065  | -3.704684 | 2.105329  |
| H | -2.239826 | 4.715153  | 1.640872  | H | 0.920964  | -5.297163 | 2.241487  |
| C | 1.263348  | -0.218053 | 2.503114  | H | 0.048062  | -3.773831 | 2.642451  |
| C | 2.593520  | -0.697240 | 2.376504  | C | 1.379049  | -4.733122 | -0.432531 |
| C | 3.076121  | -1.605823 | 3.339112  | H | 1.188751  | -4.469110 | -1.488970 |
| H | 4.112384  | -1.968038 | 3.256871  | H | 1.365200  | -5.836745 | -0.328729 |
| C | 2.272577  | -2.047958 | 4.393592  | H | 2.394504  | -4.376959 | -0.170609 |
| H | 2.675008  | -2.742833 | 5.146283  | C | -1.415643 | -4.899219 | -1.224871 |
| C | 0.940899  | -1.623439 | 4.465728  | H | -2.509543 | -4.987933 | -1.373657 |
| H | 0.296764  | -2.000544 | 5.274310  | H | -0.944447 | -5.860222 | -1.509136 |
| C | 0.406612  | -0.724139 | 3.525564  | H | -1.037655 | -4.109946 | -1.904019 |
| C | 3.501155  | -0.297256 | 1.223970  | C | -1.632578 | -5.660682 | 1.160235  |
| H | 2.987336  | 0.499120  | 0.651887  | H | -1.586292 | -5.360756 | 2.223080  |
| C | 4.852332  | 0.267999  | 1.688300  | H | -1.024321 | -6.577193 | 1.022991  |
| H | 4.722071  | 1.131710  | 2.371545  | H | -2.685420 | -5.907920 | 0.919877  |
| H | 5.437224  | 0.614870  | 0.812768  | B | -1.031662 | -2.270614 | 0.335518  |
| H | 5.461528  | -0.492061 | 2.220143  |   |           |           |           |
| C | 3.689919  | -1.506746 | 0.289512  |   |           |           |           |
| H | 4.108545  | -2.371921 | 0.845641  |   |           |           |           |
| H | 4.390662  | -1.263364 | -0.532118 |   |           |           |           |
| H | 2.721714  | -1.817620 | -0.149530 |   |           |           |           |
| C | -1.054632 | -0.303039 | 3.633694  |   |           |           |           |
| H | -1.327446 | 0.142556  | 2.657229  |   |           |           |           |
| C | -1.272837 | 0.765429  | 4.719448  |   |           |           |           |
| H | -0.995814 | 0.378815  | 5.722679  |   |           |           |           |
| H | -2.340139 | 1.068980  | 4.756281  |   |           |           |           |

Conformation 14.

Multiplicity: 3

Charge: 0

E(B97-3c) = -3245.807559768978 Hartree

E(M06/def2-TZVP) = -3245.832323544536 Hartree

E(PBE - D3(BJ)/def2-TZVP) = -3244.546918780320 Hartree

E(PBE0 - D3(BJ)/def2-TZVP) = -3244.794067184479 Hartree

E(PBEh-3c) = -3241.121740502013 Hartree

E(PM6) = -149.80649 Kcal/mol

E(PM7) = -168.80914 Kcal/mol  
E( $\omega$ B97X-V/def2-TZVP) = -3246.878271518955 Hartree  
E(GFN1-xTB) = -165.444559293266 Hartree  
E(GFN2-xTB) = -162.840417247739 Hartree  
E(GFN-FF) = -22.328108762868 Hartree

Coordinates:

|   |           |           |           |
|---|-----------|-----------|-----------|
| V | -0.143516 | 0.063693  | -0.495559 |
| O | 1.270747  | -2.881901 | 2.293573  |
| O | 1.029832  | -0.600079 | 2.607399  |
| N | -1.882254 | 0.610287  | 0.236333  |
| N | -0.963366 | -0.765383 | -2.117671 |
| N | 1.157776  | 1.526591  | -0.796353 |
| N | 0.474086  | -1.504231 | 0.379142  |
| H | 0.586779  | -2.338918 | -0.208641 |
| C | -2.967546 | 0.854256  | -0.550486 |
| C | -3.083770 | 0.382172  | -1.868678 |
| H | -4.010980 | 0.648243  | -2.394089 |
| C | -2.200281 | -0.471740 | -2.573781 |
| C | -4.089515 | 1.700116  | 0.004800  |
| H | -4.462395 | 1.316497  | 0.974472  |
| H | -4.933069 | 1.761209  | -0.706279 |
| H | -3.715787 | 2.727923  | 0.198118  |
| C | -2.707467 | -1.024984 | -3.888150 |
| H | -1.948798 | -1.628477 | -4.416116 |
| H | -3.024140 | -0.194732 | -4.551381 |
| H | -3.605369 | -1.653000 | -3.719918 |
| C | -2.077164 | 0.690890  | 1.660803  |
| C | -2.720745 | -0.408789 | 2.302324  |
| C | -3.068225 | -0.282108 | 3.658297  |
| H | -3.587370 | -1.112927 | 4.160258  |
| C | -2.759984 | 0.876803  | 4.382574  |
| H | -3.048606 | 0.960531  | 5.441454  |
| C | -2.057717 | 1.913206  | 3.758989  |
| H | -1.785637 | 2.810755  | 4.335684  |
| C | -1.700419 | 1.842514  | 2.398240  |
| C | -3.050735 | -1.692407 | 1.546439  |
| H | -2.480436 | -1.657258 | 0.597190  |
| C | -2.587769 | -2.945202 | 2.306614  |
| H | -1.492072 | -2.940793 | 2.467993  |
| H | -2.836053 | -3.857035 | 1.727457  |
| H | -3.086266 | -3.041791 | 3.293006  |
| C | -4.544871 | -1.789376 | 1.191218  |
| H | -5.173041 | -1.818330 | 2.106273  |
| H | -4.745946 | -2.715484 | 0.613336  |
| H | -4.879397 | -0.932665 | 0.574914  |
| C | -0.911047 | 2.977002  | 1.768271  |
| H | -0.819017 | 2.752789  | 0.689134  |
| C | 0.508390  | 3.018729  | 2.359534  |
| H | 0.481497  | 3.266349  | 3.441903  |
| H | 1.120244  | 3.789061  | 1.849961  |
| H | 1.012928  | 2.039307  | 2.249786  |
| C | -1.613571 | 4.337945  | 1.886947  |
| H | -2.638438 | 4.304616  | 1.464555  |
| H | -1.043382 | 5.108317  | 1.329530  |
| H | -1.695927 | 4.671912  | 2.942514  |
| C | -0.160709 | -1.755856 | -2.784115 |
| C | 0.865545  | -1.350134 | -3.691197 |
| H | 1.621730  | -2.353095 | -4.326468 |
| C | 2.411565  | -2.061420 | -5.031820 |
| C | 1.393402  | -3.712112 | -4.083053 |
| H | 1.997026  | -4.474651 | -4.598113 |
| C | 0.405276  | -4.093170 | -3.172158 |
| H | 0.235840  | -5.161653 | -2.970772 |
| C | -0.382087 | -3.137962 | -2.501196 |
| C | 1.140300  | 0.121656  | -3.994593 |
| H | 1.031265  | 0.668086  | -3.034626 |
| C | 0.122463  | 0.718363  | -4.984164 |
| H | 0.360285  | 1.783792  | -5.178473 |
| H | -0.911430 | 0.681044  | -4.598358 |
| H | 0.147225  | 0.175689  | -5.952404 |
| C | 2.563862  | 0.380021  | -4.504935 |
| H | 3.331066  | -0.033554 | -3.821970 |
| H | 2.738458  | 1.470823  | -4.585961 |
| H | 2.725783  | -0.045054 | -5.517810 |
| C | -1.449150 | -3.625793 | -1.521920 |
| H | -1.809674 | -2.743369 | -0.956269 |
| C | -0.893400 | -4.639453 | -0.504863 |
| H | -0.543098 | -5.567199 | -1.001413 |
| H | -1.686626 | -4.933215 | 0.210301  |
| H | -0.052094 | -4.233342 | 0.089715  |
| C | -2.654463 | -4.241677 | -2.256845 |
| H | -3.092232 | -3.546618 | -2.996624 |
| H | -3.449750 | -4.517837 | -1.533914 |
| H | -2.358048 | -5.163128 | -2.800315 |
| C | 0.633391  | 2.745777  | -1.261235 |
| C | 1.200809  | 4.003641  | -0.931911 |
| H | 2.142573  | 4.037569  | -0.366287 |
| C | 0.563866  | 5.194598  | -1.297548 |
| H | 1.027262  | 6.154097  | -1.015033 |
| C | -0.661981 | 5.204914  | -1.997115 |

|   |           |           |           |
|---|-----------|-----------|-----------|
| C | -1.209572 | 3.954317  | -2.346868 |
| H | -2.153514 | 3.909950  | -2.914423 |
| C | -0.569783 | 2.756078  | -2.011339 |
| H | -1.011673 | 1.805831  | -2.341700 |
| C | -1.351432 | 6.492679  | -2.371714 |
| H | -0.821892 | 7.372733  | -1.957323 |
| H | -2.395808 | 6.520002  | -1.995678 |
| H | -1.405605 | 6.623976  | -3.473690 |
| C | 2.559140  | 1.395906  | -0.665890 |
| C | 3.442253  | 1.946417  | -1.627775 |
| H | 3.026190  | 2.510843  | -2.473924 |
| C | 4.826134  | 1.775713  | -1.518869 |
| H | 5.480862  | 2.208901  | -2.292783 |
| C | 5.399867  | 1.050351  | -0.453821 |
| C | 4.517260  | 0.511735  | 0.503694  |
| H | 4.929877  | -0.049782 | 1.358462  |
| C | 3.130628  | 0.685183  | 0.413408  |
| H | 2.474262  | 0.280407  | 1.194812  |
| C | 6.894007  | 0.893167  | -0.325584 |
| H | 7.342581  | 1.730790  | 0.252611  |
| H | 7.390363  | 0.883740  | -1.316710 |
| H | 7.162852  | -0.044192 | 0.201177  |
| C | 1.988394  | -2.570088 | 3.515753  |
| C | 1.426180  | -1.134541 | 3.897406  |
| C | 3.481255  | -2.554943 | 3.162215  |
| H | 3.751568  | -3.531689 | 2.715976  |
| H | 4.117538  | -2.387262 | 4.052977  |
| H | 3.705392  | -1.770089 | 2.413500  |
| C | 1.699046  | -3.658955 | 4.544915  |
| H | 0.612531  | -3.790649 | 4.699702  |
| H | 2.169471  | -3.416556 | 5.518836  |
| H | 2.113748  | -4.624153 | 4.193457  |
| C | 0.177275  | -1.189835 | 4.779739  |
| H | -0.269954 | -0.179308 | 4.828645  |
| H | 0.418989  | -1.521797 | 5.808419  |
| H | -0.588614 | -1.867331 | 4.357162  |
| C | 2.456783  | -0.186447 | 4.508218  |
| H | 3.300944  | -0.000628 | 3.819129  |
| H | 2.856245  | -0.593650 | 5.458696  |
| H | 1.976630  | 0.788128  | 4.726025  |
| B | 0.895139  | -1.668834 | 1.724686  |

Conformation 17.

Multiplicity: 3

Charge: 0

E(B97-3c) = -3245.801539281352 Hartree

E(M06/def2-TZVP) = -3245.829049263117 Hartree

E(PBE - D3(BJ)/def2-TZVP) = -3244.540307955796 Hartree

E(PBE0 - D3(BJ)/def2-TZVP) = -3244.787944505697 Hartree

E(PBEh-3c) = -3241.116237118545 Hartree

E(PM6) = -148.93650 Kcal/mol

E(PM7) = -167.99316 Kcal/mol

E( $\omega$ B97X-V/def2-TZVP) = -3246.872093387058 Hartree

E(GFN1-xTB) = -165.438439133982 Hartree

E(GFN2-xTB) = -162.835264001613 Hartree

E(GFN-FF) = -22.322441839424 Hartree

Coordinates:

|   |           |           |           |
|---|-----------|-----------|-----------|
| V | 0.127637  | 0.418946  | 0.105026  |
| O | -2.083691 | -2.896228 | 1.787176  |
| O | -0.399281 | -3.075856 | 0.205300  |
| N | 2.101772  | 0.254494  | -0.239374 |
| N | 0.367103  | 1.743630  | 0.1583545 |
| N | -0.829279 | 1.099925  | -1.451740 |
| N | -0.916974 | -0.820014 | 1.112620  |
| H | -1.500420 | -0.372342 | 1.833367  |
| C | 3.025810  | 1.121182  | 0.223751  |
| C | 2.721714  | 2.163901  | 1.127033  |
| H | 3.564436  | 2.817458  | 1.390029  |
| C | 1.510282  | 2.439037  | 1.796011  |
| C | 4.478498  | 0.995150  | -0.180437 |
| H | 4.640948  | 0.198101  | -0.926642 |
| H | 5.098349  | 0.771097  | 0.711811  |
| H | 4.848360  | 1.954252  | -0.593966 |
| C | 1.498636  | 3.607116  | 2.757513  |
| H | 0.976646  | 3.367038  | 3.702771  |
| H | 0.944724  | 4.455919  | 2.304025  |
| H | 2.524641  | 3.946901  | 2.986820  |
| C | 2.444764  | -0.793270 | -1.166622 |
| C | 2.358642  | -0.525978 | -2.572455 |
| C | 2.539423  | -1.586228 | -3.478252 |
| H | 2.462165  | -1.384374 | -4.556611 |
| H | 2.799843  | -2.886358 | -3.033485 |
| C | 2.910325  | -3.710838 | -3.754025 |
| C | 2.937060  | -3.121715 | -1.664456 |
| H | 3.174567  | -4.137211 | -1.308055 |
| C | 2.793622  | -2.096978 | -0.704803 |
| H | 2.129993  | 0.876465  | -3.124611 |
| H | 1.720457  | 1.493846  | -2.304296 |
| C | 3.458009  | 1.518286  | -3.571972 |
| H | 4.203567  | 1.556987  | -2.757007 |

|   |           |           |           |                                                            |           |           |           |
|---|-----------|-----------|-----------|------------------------------------------------------------|-----------|-----------|-----------|
| H | 3.280915  | 2.555658  | -3.922807 | B                                                          | -1.132993 | -2.219760 | 1.023094  |
| H | 3.908662  | 0.946902  | -4.410492 |                                                            |           |           |           |
| C | 1.123939  | 0.924804  | -4.284227 | Conformation 22.                                           |           |           |           |
| H | 1.537105  | 0.463401  | -5.205308 | Multiplicity: 3                                            |           |           |           |
| H | 0.876735  | 1.978008  | -4.522123 | Charge: 0                                                  |           |           |           |
| H | 0.178291  | 0.407826  | -4.036914 | E(B97-3c) = -3245.801048785473 Hartree                     |           |           |           |
| C | 3.153282  | -2.510726 | 0.725630  | E(M06/def2-TZVP) = -3245.827186985248 Hartree              |           |           |           |
| H | 2.819778  | -3.568186 | 0.792705  | E(PBE - D3(BJ)/def2-TZVP) = -3244.540156876541 Hartree     |           |           |           |
| C | 2.487097  | -1.787998 | 1.895320  | E(PBE0 - D3(BJ)/def2-TZVP) = -3244.787684529594 Hartree    |           |           |           |
| H | 2.879621  | -0.764459 | 2.049754  | E(PBEh-3c) = -3241.115928865082 Hartree                    |           |           |           |
| H | 2.677538  | -2.355523 | 2.829633  | E(PM6) = -146.90124 Kcal/mol                               |           |           |           |
| H | 1.393200  | -1.721451 | 1.757035  | E(PM7) = -168.32908 Kcal/mol                               |           |           |           |
| C | 4.686453  | -2.533844 | 0.897916  | E( $\omega$ B97X-V/def2-TZVP) = -3246.871824045993 Hartree |           |           |           |
| H | 5.178979  | -3.130848 | 0.104849  | E(GFN1-xTB) = -165.438495317643 Hartree                    |           |           |           |
| H | 4.957267  | -2.973389 | 1.880188  | E(GFN2-xTB) = -162.836387569533 Hartree                    |           |           |           |
| H | 5.112852  | -1.511910 | 0.860916  | E(GFN-FF) = -22.324061356567 Hartree                       |           |           |           |
| C | -0.700503 | 1.899541  | 2.545004  |                                                            |           |           |           |
| C | -1.761977 | 2.817702  | 2.326571  | Coordinates:                                               |           |           |           |
| C | -2.759787 | 2.945025  | 3.312850  | V                                                          | 0.278278  | 0.358105  | 0.114517  |
| H | -3.580613 | 3.660589  | 3.150195  | O                                                          | -0.887803 | -2.586994 | -1.359183 |
| C | -2.728395 | 2.183744  | 4.484441  | O                                                          | 0.525673  | -3.944014 | -0.121773 |
| H | -3.517402 | 2.298471  | 5.243156  | N                                                          | 0.151133  | 1.388990  | -1.589309 |
| C | -1.690883 | 1.264069  | 4.680042  | N                                                          | 2.103959  | 1.047927  | 0.570175  |
| H | -1.672993 | 0.653247  | 5.595071  | N                                                          | -1.143101 | 0.859788  | 1.353299  |
| C | -0.667834 | 1.098753  | 3.729131  | N                                                          | 0.713678  | -1.495733 | 0.194741  |
| C | -1.860809 | 3.650073  | 1.060316  | H                                                          | 1.467253  | -1.726457 | 0.857007  |
| H | -0.989438 | 3.394858  | 0.430265  | C                                                          | 0.950375  | 2.432439  | -1.899505 |
| C | -1.802985 | 5.161699  | 1.330637  | C                                                          | 2.094899  | 2.771532  | -1.149803 |
| H | -1.781417 | 5.717900  | 0.371121  | H                                                          | 2.650254  | 3.648551  | -1.511367 |
| H | -0.899188 | 5.443823  | 1.907586  | C                                                          | 2.679396  | 2.101747  | -0.049930 |
| H | -2.686533 | 5.511002  | 1.904902  | C                                                          | 0.656643  | 3.300900  | -3.103891 |
| C | -3.120147 | 3.283760  | 0.260059  | H                                                          | -0.189902 | 2.918878  | -3.700403 |
| H | -3.165512 | 2.191480  | 0.087825  | H                                                          | 1.549967  | 3.368447  | -3.756008 |
| H | -3.113519 | 3.788819  | -0.726897 | H                                                          | 0.416929  | 4.332977  | -2.776742 |
| H | -4.045112 | 3.583486  | 0.795851  | C                                                          | 4.009518  | 2.651721  | 0.423709  |
| C | 0.446553  | 0.090517  | 3.982392  | H                                                          | 4.417413  | 2.096770  | 1.285963  |
| H | 0.919887  | -0.094980 | 3.002175  | H                                                          | 3.888997  | 3.715790  | 0.712568  |
| C | -0.075686 | -1.258551 | 4.501789  | H                                                          | 4.754699  | 2.626031  | -0.396256 |
| H | -0.477820 | -1.181165 | 5.533415  | C                                                          | -0.948758 | 0.984292  | -2.424892 |
| H | 0.753011  | -1.995189 | 4.532787  | C                                                          | -2.260187 | 1.496706  | -2.158832 |
| H | -0.871147 | -1.672846 | 3.852125  | C                                                          | -3.353445 | 0.959168  | -2.861856 |
| C | 1.527625  | 0.647713  | 4.925954  | H                                                          | -4.363041 | 1.340164  | -2.647916 |
| H | 2.001235  | 1.562741  | 4.522123  | C                                                          | -3.178467 | -0.039139 | -3.825593 |
| H | 2.329795  | -0.103624 | 5.078904  | H                                                          | -4.046082 | -0.463051 | -4.353720 |
| H | 1.100462  | 0.896116  | 5.920324  | C                                                          | -1.886368 | -0.473354 | -4.129306 |
| C | -1.683072 | 0.086034  | -1.962544 | H                                                          | -1.739408 | -1.228377 | -4.918571 |
| C | -3.092230 | 0.226365  | -2.033431 | C                                                          | -0.747961 | 0.026124  | -3.462830 |
| H | -3.556388 | 1.171510  | -1.720820 | C                                                          | -2.503823 | 2.667455  | -1.212767 |
| C | -3.893339 | -0.830205 | -2.473484 | H                                                          | -1.604194 | 2.781540  | -0.580393 |
| H | -4.986269 | -0.693523 | -2.511672 | C                                                          | -2.685575 | 3.974858  | -2.010213 |
| C | -3.338304 | -2.073519 | -2.854917 | H                                                          | -1.832895 | 4.183468  | -2.682049 |
| C | -1.942205 | -2.211770 | -2.769305 | H                                                          | -2.794064 | 4.833952  | -1.316636 |
| H | -1.468713 | -3.164867 | -3.051640 | H                                                          | -3.599808 | 3.927068  | -2.638214 |
| C | -1.126083 | -1.156130 | -2.338100 | C                                                          | -3.707964 | 2.478168  | -0.278378 |
| H | -0.036955 | -1.299294 | -2.292652 | H                                                          | -4.667307 | 2.505716  | -0.836377 |
| C | -4.219628 | -3.201916 | -3.327586 | H                                                          | -3.733185 | 3.296317  | 0.467889  |
| H | -4.721149 | -2.953240 | -4.286969 | H                                                          | -3.661510 | 1.523767  | 0.276207  |
| H | -5.022628 | -3.421866 | -2.593306 | C                                                          | 0.593326  | -0.452903 | -4.029515 |
| H | -3.639790 | -4.132552 | -3.483486 | H                                                          | 0.385059  | -1.482849 | -4.387559 |
| C | -0.771689 | 2.374250  | -2.019842 | C                                                          | 1.798489  | -0.570157 | -3.093771 |
| C | -1.586466 | 2.799336  | -3.100102 | H                                                          | 2.240747  | 0.413410  | -2.842371 |
| H | -2.312891 | 2.102850  | -3.539268 | H                                                          | 2.589946  | -1.164744 | -3.594786 |
| C | -1.462085 | 4.088479  | -3.633494 | H                                                          | 1.538912  | -1.077884 | -2.147456 |
| H | -2.115004 | 4.377532  | -4.473366 | C                                                          | 0.957615  | 0.370435  | -5.282645 |
| C | -0.527837 | 5.019617  | -3.137500 | H                                                          | 0.125884  | 0.390841  | -6.014668 |
| C | 0.307722  | 4.583556  | -2.087337 | H                                                          | 1.848866  | -0.062147 | -5.782597 |
| H | 1.075851  | 5.264231  | -1.685425 | H                                                          | 1.198545  | 1.418388  | -5.016911 |
| C | 0.199872  | 3.299463  | -1.546731 | C                                                          | 2.868939  | 0.275750  | 1.519193  |
| H | 0.895675  | 2.996803  | -0.749074 | C                                                          | 2.640677  | 0.428972  | 2.917216  |
| C | -0.432490 | 6.418974  | -3.690509 | C                                                          | 3.381754  | -0.361116 | 3.815373  |
| H | -1.055764 | 7.132310  | -3.107220 | H                                                          | 3.212894  | -0.240692 | 4.895423  |
| H | -0.782205 | 6.468576  | -4.741044 | C                                                          | 4.322312  | -1.292591 | 3.362691  |
| H | 0.607654  | 6.801865  | -3.658896 | H                                                          | 4.889650  | -1.903494 | 4.081154  |
| C | -2.174067 | -4.239452 | 1.254450  | C                                                          | 4.530772  | -1.444937 | 1.988713  |
| C | -0.754076 | -4.430495 | 0.578045  | H                                                          | 5.266018  | -2.182059 | 1.631049  |
| C | -3.320928 | -4.244720 | 0.236140  | C                                                          | 3.820766  | -0.678250 | 1.044732  |
| H | -4.241127 | -3.885060 | 0.736601  | C                                                          | 1.646811  | 1.448035  | 3.445776  |
| H | -3.515026 | -5.258104 | -0.167609 | H                                                          | 0.897329  | 1.597221  | 2.649638  |
| H | -3.102787 | -3.559775 | -0.606060 | C                                                          | 2.307218  | 2.814393  | 3.697566  |
| C | -2.474368 | -5.202514 | 2.400134  | H                                                          | 1.548533  | 3.548543  | 4.036733  |
| H | -1.745552 | -5.092825 | 3.224019  | H                                                          | 2.775007  | 3.218571  | 2.779943  |
| H | -2.460343 | -6.253798 | 2.048173  | H                                                          | 3.095301  | 2.737223  | 4.476105  |
| H | -3.482439 | -4.991326 | 2.807886  | C                                                          | 0.890289  | 0.979003  | 4.695427  |
| C | 0.303591  | -4.929506 | 1.570793  | H                                                          | 0.530857  | -0.063053 | 4.583903  |
| H | 1.299135  | -4.884273 | 1.088137  | H                                                          | 0.012122  | 1.633877  | 4.866624  |
| H | 0.118972  | -5.976725 | 1.879619  | H                                                          | 1.519982  | 1.021647  | 5.608738  |
| H | 0.332668  | -4.291336 | 2.476055  | C                                                          | 4.117808  | -0.887382 | -0.436783 |
| C | -0.749131 | -5.299828 | -0.676630 | H                                                          | 3.394326  | -0.275895 | -1.007010 |
| H | -1.431018 | -4.900617 | -1.448832 | C                                                          | 3.931412  | -2.352279 | -0.871148 |
| H | -1.049774 | -6.340194 | -0.439651 | H                                                          | 4.655093  | -3.023358 | -0.363867 |
| H | 0.272742  | -5.321936 | -1.104823 | H                                                          | 4.100445  | -2.451884 | -1.962804 |

|   |           |           |           |   |           |           |           |
|---|-----------|-----------|-----------|---|-----------|-----------|-----------|
| H | 2.911702  | -2.719114 | -0.650015 | C | 1.865564  | 1.105367  | 4.148258  |
| C | 5.535156  | -0.404446 | -0.798413 | H | 1.947534  | 2.031759  | 4.737673  |
| H | 5.705145  | 0.646789  | -0.497904 | C | 1.602614  | -0.105750 | 4.798338  |
| H | 5.704206  | -0.481189 | -1.892267 | H | 1.468151  | -0.131960 | 5.890575  |
| H | 6.308229  | -1.022499 | -0.295938 | C | 1.535686  | -1.285002 | 4.050489  |
| C | -1.973936 | -0.251861 | 1.663260  | H | 1.365019  | -2.244258 | 4.562217  |
| C | -2.031214 | -0.806535 | 2.964104  | C | 1.709709  | -1.282725 | 2.652867  |
| H | -1.429333 | -0.352857 | 3.763176  | C | 2.374345  | 2.510455  | 2.115198  |
| C | -2.835126 | -1.918301 | 3.232642  | H | 2.450899  | 2.350006  | 1.024200  |
| H | -2.860805 | -2.328678 | 4.255042  | C | 1.285255  | 3.569318  | 2.343510  |
| C | -3.609407 | -2.530505 | 2.221984  | H | 0.315813  | 3.249209  | 1.916133  |
| C | -3.534910 | -1.983560 | 0.927280  | H | 1.567631  | 4.526362  | 1.860439  |
| H | -4.127639 | -2.429572 | 0.113059  | H | 1.138659  | 3.773496  | 3.423797  |
| C | -2.734897 | -0.867175 | 0.645821  | C | 3.741755  | 3.027370  | 2.598881  |
| H | -2.695980 | -0.467525 | -0.377672 | H | 3.725672  | 3.261241  | 3.683722  |
| C | -4.449167 | -3.748398 | 2.512879  | H | 4.015785  | 3.958074  | 2.060654  |
| H | -4.852192 | -3.732142 | 3.545012  | H | 4.547127  | 2.286081  | 2.428710  |
| H | -3.850230 | -4.680382 | 2.412805  | H | 1.767476  | -2.611403 | 1.913806  |
| H | -5.302038 | -3.833979 | 1.810674  | C | 1.746336  | -2.391557 | 0.831018  |
| C | -1.343287 | 2.098449  | 1.968303  | C | 0.580958  | -3.532976 | 2.225470  |
| C | -0.526139 | 3.201157  | 1.594922  | H | 0.571589  | -3.845803 | 3.290587  |
| H | 0.260340  | 3.068498  | 0.835615  | H | 0.642796  | -4.050685 | 1.680810  |
| C | -0.696484 | 4.461021  | 2.175303  | H | -0.386203 | -3.045830 | 2.001984  |
| H | -0.034115 | 5.283230  | 1.858869  | C | 3.093677  | -3.340067 | 2.203722  |
| C | -1.690568 | 4.704787  | 3.146258  | H | 3.971878  | -2.697889 | 1.997743  |
| C | -2.511054 | 3.615457  | 3.502462  | H | 3.176305  | -4.248096 | 1.571929  |
| H | -3.307136 | 3.763712  | 4.250594  | H | 3.154368  | -3.653743 | 3.267038  |
| C | -2.352958 | 2.345547  | 2.933942  | C | 0.189454  | 1.437976  | -3.057600 |
| H | -3.027956 | 1.532132  | 3.232121  | C | -0.077814 | 2.841412  | -3.096085 |
| C | -1.893783 | 6.075026  | 3.742206  | C | -0.897074 | 3.320838  | -4.144953 |
| H | -2.641257 | 6.665128  | 3.167229  | H | -1.086245 | 4.404247  | -4.203676 |
| H | -0.953681 | 6.662351  | 3.747567  | C | -1.455518 | 2.481674  | -5.105769 |
| H | -2.264614 | 6.016113  | 4.785328  | H | -2.082906 | 2.895935  | -5.909355 |
| C | -1.061061 | -3.929910 | -1.875730 | C | -1.207735 | 1.106748  | -5.037424 |
| C | -0.458921 | -4.825168 | -0.714158 | H | -1.651241 | 0.442324  | -5.791518 |
| C | -0.253863 | -4.032335 | -3.175422 | C | -0.390915 | 0.561337  | -4.033562 |
| H | -0.623454 | -3.267671 | -3.884860 | C | 0.411328  | 3.961056  | -2.152645 |
| H | -0.361143 | -5.025894 | -3.652595 | H | 0.801563  | 4.739465  | -2.847829 |
| H | 0.821717  | -3.840280 | -2.992394 | C | 1.525233  | 3.674396  | -1.144671 |
| C | -2.543291 | -4.156002 | -2.160918 | H | 1.736932  | 4.600372  | -0.573665 |
| H | -3.158186 | -3.986212 | -1.259227 | H | 2.474240  | 3.352382  | -1.608483 |
| H | -2.724707 | -5.186934 | -2.526089 | C | 1.214835  | 2.899279  | -0.423360 |
| H | -2.880577 | -3.444687 | -2.940742 | H | -0.777293 | 4.613355  | -1.407402 |
| C | -1.485582 | -5.147526 | 0.379057  | H | -1.614397 | 4.863173  | -2.087229 |
| H | -0.952856 | -5.577197 | 1.249775  | H | -0.445736 | 5.551076  | -0.916688 |
| H | -2.244085 | -5.878418 | 0.035569  | H | -1.176870 | 3.956040  | -0.609527 |
| H | -1.999528 | -4.226316 | 0.715902  | C | -0.124174 | -0.941576 | -4.024364 |
| C | 0.239929  | -6.098684 | -1.182069 | H | -0.084435 | -1.243094 | -2.959801 |
| H | 1.093212  | -5.872880 | -1.847741 | C | 1.225385  | -1.232097 | -4.662694 |
| H | -0.465524 | -6.763928 | -1.719711 | H | 1.282408  | -0.957141 | -5.710407 |
| H | 0.631178  | -6.651499 | -0.305393 | H | 1.341112  | -2.423169 | -4.669961 |
| B | 0.123948  | -2.640013 | -0.404967 | H | 2.087215  | -0.913351 | -4.105214 |

Conformation 23.

Multiplicity: 3

Charge: 0

E(B97-3c) = -3245.793225753192 Hartree  
E(M06/def2-TZVP) = -3245.817524484608 Hartree  
E(PBE - D3(BJ)/def2-TZVP) = -3244.533924957005 Hartree  
E(PBE0 - D3(BJ)/def2-TZVP) = -3244.780760643286 Hartree  
E(PBEh-3c) = -3241.106749211474 Hartree  
E(PM6) = -142.86329 Kcal/mol  
E(PM7) = -161.26403 Kcal/mol  
E( $\omega$ B97X-V/def2-TZVP) = -3246.864639838727 Hartree  
E(GFN1-xTB) = -165.433160972686 Hartree  
E(GFN2-xTB) = -162.827517342368 Hartree  
E(GFN-FF) = -22.315109370906 Hartree

Coordinates:

|   |           |           |           |   |           |           |           |
|---|-----------|-----------|-----------|---|-----------|-----------|-----------|
| V | 0.327300  | 0.008867  | -0.437446 | H | 2.992625  | -6.180505 | -3.562584 |
| O | -1.581615 | 0.880722  | 2.419084  | C | -1.830554 | -1.965264 | -0.427888 |
| O | -2.554424 | 2.687223  | 1.348706  | C | -2.402338 | -1.716140 | 0.836841  |
| N | 2.027873  | 0.036468  | 0.561627  | H | -1.765187 | -1.373348 | 1.663783  |
| N | 1.086611  | 0.871045  | -2.078513 | C | -3.779748 | -1.883444 | 1.041190  |
| N | -0.436301 | -1.795015 | -0.646340 | H | -4.196024 | -1.704654 | 2.045400  |
| N | -0.902330 | 1.361129  | 0.070924  | C | -4.640620 | -2.298401 | 0.007820  |
| H | -1.166695 | 1.972223  | -0.713379 | C | -4.061173 | -2.549925 | -1.254313 |
| C | 3.238468  | 0.169524  | -0.038345 | H | -4.701463 | -2.877649 | -2.089385 |
| C | 3.396343  | 0.550653  | -1.386775 | C | -2.689069 | -2.390207 | -1.469451 |
| H | 4.434344  | 0.607588  | -1.740210 | H | -2.259719 | -2.602078 | -2.456358 |
| C | 2.415074  | 0.955895  | -2.322358 | C | -6.124755 | -2.443142 | 0.230069  |
| C | 4.494955  | -0.149462 | 0.738290  | H | -6.674074 | -1.548159 | -0.135425 |
| H | 4.385190  | 0.066250  | 1.816556  | H | -6.367293 | -2.559173 | 1.304807  |
| H | 5.363697  | 0.406748  | 0.340758  | H | -6.537841 | -3.317421 | -0.312434 |
| H | 4.716726  | -1.234071 | 0.646733  | C | -2.443090 | 1.507980  | 3.405222  |
| C | 2.906400  | 1.559414  | -3.621290 | C | -3.380146 | 2.428161  | 2.511501  |
| H | 2.300017  | 1.237289  | -4.487319 | C | -1.559391 | 2.304543  | 4.369000  |
| H | 3.964821  | 1.293873  | -3.798414 | H | -0.788943 | 1.626206  | 4.782050  |
| H | 2.834089  | 2.666893  | -3.587880 | H | -2.150500 | 2.725097  | 5.205794  |
| C | 1.923841  | -0.036544 | 1.996939  | H | -1.037903 | 3.131070  | 3.853557  |
| C | 2.029576  | 1.169575  | 2.753944  | C | -3.172175 | 0.409940  | 4.176962  |

|   |           |           |          |
|---|-----------|-----------|----------|
| H | -3.733423 | -0.259962 | 3.502299 |
| H | -3.879402 | 0.844300  | 4.911669 |
| H | -2.432572 | -0.202060 | 4.730061 |
| C | -4.635261 | 1.701625  | 2.009761 |
| H | -5.125394 | 2.331247  | 1.241823 |
| H | -5.362491 | 1.513475  | 2.824112 |
| H | -4.372727 | 0.734954  | 1.537020 |
| C | -3.760069 | 3.761285  | 3.150494 |
| H | -2.866678 | 4.369548  | 3.381443 |
| H | -4.334322 | 3.602255  | 4.085143 |
| H | -4.395506 | 4.340142  | 2.451736 |
| B | -1.648927 | 1.632782  | 1.252787 |

Conformation 27.

Multiplicity: 3

Charge: 0

E(B97-3c) = -3245.781403204910 Hartree  
 E(M06/def2-TZVP) = -3245.813225579809 Hartree  
 E(PBE - D3(BJ)/def2-TZVP) = -3244.521840173242 Hartree  
 E(PBE0 - D3(BJ)/def2-TZVP) = -3244.769945125457 Hartree  
 E(PBEh-3c) = -3241.094502843497 Hartree  
 E(PM6) = -146.60975 Kcal/mol  
 E(PM7) = -160.53152 Kcal/mol  
 E( $\omega$ B97X-V/def2-TZVP) = -3246.853863091834 Hartree  
 E(GFN1-xTB) = -165.427016702338 Hartree  
 E(GFN2-xTB) = -162.819046830402 Hartree  
 E(GFN-FF) = -22.309054926778 Hartree

Coordinates:

|   |           |           |           |
|---|-----------|-----------|-----------|
| V | 0.552269  | -0.058340 | 0.119855  |
| O | -2.893716 | -0.936093 | -2.348666 |
| O | -2.544982 | 1.253399  | -1.686648 |
| N | 2.061006  | 1.296096  | 0.183168  |
| N | 1.799844  | -1.500427 | -0.571222 |
| N | -0.154360 | -0.272287 | 1.925447  |
| N | -0.771146 | -0.473674 | -1.205268 |
| H | -0.621983 | -1.444838 | -1.521017 |
| C | 3.372794  | 0.982894  | 0.156292  |
| C | 3.841294  | -0.347423 | 0.075008  |
| H | 4.924979  | -0.476658 | 0.193327  |
| C | 3.128577  | -1.501389 | -0.311985 |
| C | 4.427742  | 2.068102  | 0.146200  |
| H | 4.714046  | 2.284433  | -0.904848 |
| H | 5.342723  | 1.731708  | 0.668713  |
| H | 4.078255  | 3.015961  | 0.591203  |
| C | 3.915645  | -2.780732 | -0.487583 |
| H | 3.904226  | -3.124571 | -1.540814 |
| H | 3.460128  | -3.599661 | 0.104626  |
| H | 4.965266  | -2.646982 | -0.169698 |
| C | 1.640675  | 2.668902  | 0.281032  |
| C | 1.185582  | 3.299672  | -0.920362 |
| C | 0.722335  | 4.624976  | -0.868666 |
| H | 0.368060  | 5.105685  | -1.791719 |
| C | 0.716850  | 5.340904  | 0.331715  |
| H | 0.360911  | 6.381827  | 0.360260  |
| C | 1.175374  | 4.721184  | 1.494506  |
| H | 1.177977  | 5.285863  | 2.440572  |
| C | 1.638834  | 3.385831  | 1.520389  |
| H | 1.230269  | 2.588596  | -2.268139 |
| C | 1.238137  | 1.497481  | -2.066046 |
| C | -0.003572 | 2.873286  | -3.131497 |
| H | -0.932838 | 2.672529  | -2.567111 |
| H | 0.000102  | 2.217715  | -4.025198 |
| H | -0.022306 | 3.920213  | -3.500037 |
| C | 2.521162  | 2.932159  | -3.031754 |
| H | 2.580932  | 4.023568  | -3.224846 |
| H | 2.545370  | 2.408778  | -4.008933 |
| H | 3.428001  | 2.638707  | -2.469515 |
| C | 2.018737  | 2.908164  | 2.936758  |
| H | 2.487877  | 3.808444  | 3.393138  |
| C | 3.021805  | 1.766840  | 3.125388  |
| H | 2.638657  | 0.804575  | 2.748215  |
| H | 3.204889  | 1.631300  | 4.210479  |
| H | 3.998950  | 1.972807  | 2.653222  |
| C | 0.748946  | 2.616397  | 3.763590  |
| H | 0.012480  | 3.441043  | 3.699459  |
| H | 1.014187  | 2.465864  | 4.829673  |
| H | 0.259258  | 1.693503  | 3.408002  |
| C | 1.285995  | -2.630688 | -1.315272 |
| C | 1.418910  | -2.684351 | -2.739264 |
| C | 0.932301  | -3.834074 | -3.399028 |
| H | 1.038082  | -3.884956 | -4.494639 |
| C | 0.320026  | -4.890434 | -2.720572 |
| H | -0.044187 | -5.769269 | -3.273656 |
| C | 0.169456  | -4.808426 | -1.334860 |
| H | -0.322308 | -5.626023 | -0.785925 |
| C | 0.643106  | -3.695159 | -0.617943 |
| C | 1.937179  | -1.593957 | -3.691078 |
| H | 2.323250  | -2.164279 | -4.564399 |
| C | 3.083716  | -0.681724 | -3.245243 |
| H | 3.424470  | -0.082488 | -4.114175 |

|   |           |           |           |
|---|-----------|-----------|-----------|
| H | 3.958527  | -1.246280 | -2.871223 |
| H | 2.774732  | 0.027458  | -2.457516 |
| C | 0.753815  | -0.749933 | -4.209495 |
| H | -0.043520 | -1.390449 | -4.635975 |
| H | 1.094299  | -0.044717 | -4.995859 |
| H | 0.301970  | -0.169951 | -3.382710 |
| C | 0.425882  | -3.649260 | 0.883946  |
| H | 0.897507  | -2.721624 | 1.250982  |
| C | 1.097339  | -4.814916 | 1.625409  |
| H | 0.629946  | -5.790186 | 1.374686  |
| H | 1.011341  | -4.666962 | 2.721257  |
| H | 2.176855  | -4.889694 | 1.381326  |
| C | -1.070012 | -3.558669 | 1.221846  |
| H | -1.540678 | -2.700597 | 0.702812  |
| H | -1.204079 | -3.421834 | 2.314571  |
| H | -1.612057 | -4.480497 | 0.923932  |
| C | 0.372272  | -0.927428 | 3.043158  |
| C | 1.687646  | -1.457685 | 2.977869  |
| H | 2.275761  | -1.323037 | 2.058688  |
| C | 2.263639  | -2.121287 | 4.064607  |
| H | 3.284774  | -2.522432 | 3.959973  |
| C | 1.579766  | -2.272254 | 5.287919  |
| C | 0.291818  | -1.704586 | 5.368920  |
| H | -0.269376 | -1.776555 | 6.315101  |
| C | -0.303103 | -1.046164 | 4.286114  |
| H | -1.301564 | -0.606328 | 4.409112  |
| C | 2.206976  | -2.967402 | 6.470058  |
| H | 3.117725  | -3.525965 | 6.177356  |
| H | 1.505618  | -3.685963 | 6.942443  |
| H | 2.502669  | -2.243730 | 7.260597  |
| C | -1.453969 | 0.294747  | 1.930496  |
| C | -1.626629 | 1.621078  | 1.472511  |
| H | -0.746024 | 2.217629  | 1.189939  |
| C | -2.900514 | 2.204840  | 1.407359  |
| H | -2.992862 | 3.236866  | 1.035598  |
| C | -4.045995 | 1.508351  | 1.826604  |
| C | -3.874032 | 0.172799  | 2.260789  |
| H | -4.757264 | -0.411742 | 2.565781  |
| C | -2.616167 | -0.431495 | 2.298927  |
| H | -2.521387 | -1.479261 | 2.611714  |
| C | -5.412468 | 2.145821  | 1.826656  |
| H | -6.154364 | 1.518661  | 1.288809  |
| H | -5.397917 | 3.143430  | 1.346915  |
| H | -5.797321 | 2.276434  | 2.860557  |
| C | -4.165698 | -0.264843 | -2.493608 |
| C | -3.734784 | 1.256736  | -2.519238 |
| C | -5.007632 | -0.615486 | -1.259555 |
| H | -5.077255 | -1.717802 | -1.178028 |
| H | -6.034074 | -0.203282 | -1.325621 |
| H | -4.527750 | -0.234798 | -0.336905 |
| C | -4.844265 | -0.766401 | -3.765223 |
| H | -4.180281 | -0.670205 | -4.643759 |
| H | -5.781858 | -0.208888 | -3.964215 |
| H | -5.100843 | -1.838035 | -3.650555 |
| C | -3.330266 | 1.722583  | -3.924150 |
| H | -2.879153 | 2.731412  | -3.863096 |
| H | -4.206563 | 1.778529  | -4.599120 |
| H | -2.583054 | 1.038041  | -4.371577 |
| C | -4.753067 | 2.220041  | -1.918444 |
| H | -4.960594 | 1.975597  | -0.862792 |
| H | -5.704451 | 2.193418  | -2.487187 |
| H | -4.358720 | 3.254854  | -1.958140 |
| B | -2.029511 | -0.041208 | -1.713954 |

Conformation 30.

Multiplicity: 3

Charge: 0

E(B97-3c) = -3245.778887900713 Hartree  
 E(M06/def2-TZVP) = -3245.807028098133 Hartree  
 E(PBE - D3(BJ)/def2-TZVP) = -3244.519852550107 Hartree  
 E(PBE0 - D3(BJ)/def2-TZVP) = -3244.767704867240 Hartree  
 E(PBEh-3c) = -3241.093521830369 Hartree  
 E(PM6) = -136.19646 Kcal/mol  
 E(PM7) = -154.29838 Kcal/mol  
 E( $\omega$ B97X-V/def2-TZVP) = -3246.851887497893 Hartree  
 E(GFN1-xTB) = -165.423198959961 Hartree  
 E(GFN2-xTB) = -162.816027443892 Hartree  
 E(GFN-FF) = -22.309429283128 Hartree

Coordinates:

|   |           |           |           |
|---|-----------|-----------|-----------|
| V | -0.018082 | -0.191725 | -0.373391 |
| O | 0.667283  | 1.211190  | 2.580084  |
| O | -0.558059 | 3.148733  | 2.253464  |
| N | 1.964531  | -0.228420 | -0.782217 |
| N | -0.595333 | 0.265676  | -2.242153 |
| N | -0.988544 | -1.786924 | 0.294937  |
| N | -0.577431 | 1.415832  | 0.463457  |
| H | -1.294948 | 1.971428  | -0.017838 |
| C | 2.328285  | -0.639132 | -2.027745 |
| C | 1.475508  | -0.614111 | -3.151840 |
| H | 1.941761  | -0.949427 | -4.088760 |



|   |           |           |           |                                                            |           |           |           |
|---|-----------|-----------|-----------|------------------------------------------------------------|-----------|-----------|-----------|
| C | 0.184492  | -0.051594 | -3.297779 | C                                                          | 0.843217  | -6.815748 | -1.908964 |
| C | 3.731648  | -1.146218 | -2.293224 | H                                                          | 1.853669  | -7.049493 | -1.508177 |
| H | 4.425064  | -0.937589 | -1.461238 | H                                                          | 0.927422  | -6.781281 | -3.012975 |
| H | 4.143388  | -0.706404 | -3.222212 | H                                                          | 0.188713  | -7.671168 | -1.643185 |
| H | 3.691833  | -2.245073 | -2.440129 | C                                                          | 0.939681  | 2.038913  | 3.739827  |
| C | -0.275261 | 0.195278  | -4.719492 | C                                                          | -0.207448 | 3.140901  | 3.660271  |
| H | -1.348123 | 0.445563  | -4.786522 | C                                                          | 2.349520  | 2.612625  | 3.577348  |
| H | -0.071333 | -0.695078 | -5.346141 | H                                                          | 3.058882  | 1.778702  | 3.416218  |
| H | 0.303214  | 1.033015  | -5.160286 | H                                                          | 2.666601  | 3.181331  | 4.473256  |
| C | 3.022095  | 0.118887  | 0.150176  | H                                                          | 2.416901  | 3.276631  | 2.695835  |
| C | 3.673882  | 1.391276  | 0.013074  | C                                                          | 0.883850  | 1.153566  | 4.984397  |
| C | 4.735698  | 1.705240  | 0.887669  | H                                                          | -0.064877 | 0.589370  | 5.047546  |
| H | 5.230598  | 2.682384  | 0.770964  | H                                                          | 0.998663  | 1.759371  | 5.905440  |
| C | 5.171679  | 0.831023  | 1.881615  | H                                                          | 1.713576  | 0.420174  | 4.952675  |
| H | 6.004686  | 1.103813  | 2.546667  | C                                                          | -1.474887 | 2.749665  | 4.429956  |
| C | 4.535049  | -0.403072 | 2.002402  | H                                                          | -2.279563 | 3.467268  | 4.177078  |
| H | 4.873113  | -1.117463 | 2.769451  | H                                                          | -1.320312 | 2.769741  | 5.526429  |
| C | 3.477751  | -0.795015 | 1.154559  | H                                                          | -1.824505 | 1.741032  | 4.137342  |
| C | 3.318801  | 2.553669  | -0.927658 | C                                                          | 0.238050  | 4.545344  | 4.060384  |
| H | 4.251236  | 3.157655  | -0.950841 | H                                                          | 1.054332  | 4.911396  | 3.411558  |
| C | 2.992882  | 2.275712  | -2.398102 | H                                                          | 0.585088  | 4.564762  | 5.112841  |
| C | 3.745532  | 1.617916  | -2.873366 | H                                                          | -0.613876 | 5.247001  | 3.965988  |
| H | 2.995672  | 3.237538  | -2.951263 | B                                                          | -0.165765 | 1.926714  | 1.724347  |
| H | 2.000036  | 1.818014  | -2.541501 |                                                            |           |           |           |
| C | 2.248991  | 3.447768  | -0.282204 |                                                            |           |           |           |
| H | 1.292186  | 2.905892  | -0.163056 | Conformation 31.                                           |           |           |           |
| H | 2.067962  | 4.345783  | -0.906616 | Multiplicity: 3                                            |           |           |           |
| H | 2.569270  | 3.793538  | 0.719531  | Charge: 0                                                  |           |           |           |
| C | 2.932925  | -2.193799 | 1.452703  | E(B97-3c) = -3245.787408443377 Hartree                     |           |           |           |
| H | 3.699805  | -2.642182 | 2.120514  | E(M06/def2-TZVP) = -3245.814781131296 Hartree              |           |           |           |
| C | 2.829909  | -3.150033 | 0.259147  | E(PBE - D3(BJ)/def2-TZVP) = -3244.527681443584 Hartree     |           |           |           |
| H | 2.072636  | -2.839392 | -0.480713 | E(PBE0 - D3(BJ)/def2-TZVP) = -3244.775079788862 Hartree    |           |           |           |
| H | 2.532526  | -4.158371 | 0.609766  | E(PBEh-3c) = -3241.103085665205 Hartree                    |           |           |           |
| H | 3.806520  | -3.245353 | -0.255055 | E(PM6) = -134.93475 Kcal/mol                               |           |           |           |
| C | 1.649193  | -2.116885 | 2.289188  | E(PM7) = -161.13247 Kcal/mol                               |           |           |           |
| H | 1.795218  | -1.484306 | 3.185573  | E( $\omega$ B97X-V/def2-TZVP) = -3246.860116028166 Hartree |           |           |           |
| H | 1.329897  | -3.127990 | 2.612367  | E(GFN1-xTB) = -165.430664114686 Hartree                    |           |           |           |
| H | 0.814055  | -1.681748 | 1.709564  | E(GFN2-xTB) = -162.829281041310 Hartree                    |           |           |           |
| C | -1.864662 | 0.919267  | -2.458421 | E(GFN-FF) = -22.315125636774 Hartree                       |           |           |           |
| C | -3.063685 | 0.147582  | -2.556394 |                                                            |           |           |           |
| C | -4.272432 | 0.820451  | -2.816744 | Coordinates:                                               |           |           |           |
| H | -5.198958 | 0.236499  | -2.902998 | V                                                          | 0.071462  | -0.468708 | 0.213491  |
| C | -4.325648 | 2.209279  | -2.968497 | O                                                          | 0.377560  | 2.491289  | -0.791239 |
| H | -5.283656 | 2.708486  | -3.178608 | O                                                          | 2.274583  | 2.284208  | -2.107296 |
| C | -3.154215 | 2.956114  | -2.834644 | N                                                          | 0.334851  | 0.095048  | 2.126806  |
| H | -3.195480 | 4.050888  | -2.937173 | N                                                          | 0.657887  | -2.347032 | 0.482424  |
| C | -1.914526 | 2.341600  | -2.571160 | N                                                          | -1.707564 | -0.422865 | -0.646674 |
| C | -3.074035 | -1.371154 | -2.411318 | N                                                          | 1.397113  | 0.266668  | -0.917281 |
| H | -2.288071 | -1.619277 | -1.672086 | H                                                          | 2.058941  | -0.330129 | -1.422402 |
| C | -2.734337 | -2.091260 | -3.729360 | C                                                          | 0.439896  | -0.833910 | 3.120349  |
| H | -2.744494 | -3.189547 | -3.577398 | C                                                          | 0.451033  | -2.225936 | 2.896747  |
| H | -1.733580 | -1.825963 | -4.114362 | H                                                          | 0.443728  | -2.843366 | 3.804626  |
| H | -3.476912 | -1.842383 | -4.516532 | C                                                          | 0.603664  | -2.947931 | 1.688439  |
| C | -4.400376 | -1.915001 | -1.861756 | C                                                          | 0.552321  | -0.378354 | 4.559478  |
| H | -4.699058 | -1.404217 | -0.925908 | H                                                          | 1.437612  | 0.269738  | 4.707328  |
| H | -4.297979 | -2.996628 | -1.643238 | H                                                          | 0.632270  | -1.244902 | 5.239766  |
| H | -5.227328 | -1.816803 | -2.595646 | C                                                          | -0.321762 | 0.230910  | 4.856156  |
| C | -0.683243 | 3.232437  | -2.443936 | H                                                          | 0.721668  | -4.448888 | 1.815290  |
| H | 0.136168  | 2.605091  | -2.044510 | H                                                          | 1.113864  | -4.917822 | 0.895267  |
| C | -0.905648 | 4.394956  | -1.460916 | H                                                          | -0.278480 | -4.882733 | 2.023235  |
| H | -1.719479 | 5.068876  | -1.797442 | H                                                          | 1.376349  | -4.720234 | 2.665865  |
| H | 0.012025  | 5.009760  | -1.381476 | C                                                          | 0.627622  | 1.460871  | 2.509212  |
| H | -1.154398 | 4.044821  | -0.439896 | C                                                          | 2.003140  | 1.846146  | 2.553366  |
| C | -0.235000 | 3.781469  | -3.810321 | C                                                          | 2.349176  | 3.095908  | 3.099905  |
| H | -0.032362 | 2.973099  | -4.537932 | H                                                          | 3.411087  | 3.379331  | 3.156222  |
| H | 0.692459  | 4.380227  | -3.701404 | C                                                          | 1.375282  | 3.977656  | 3.571294  |
| H | -1.013582 | 4.439015  | -4.250166 | H                                                          | 1.660060  | 4.947791  | 4.005498  |
| C | -1.942535 | -1.776285 | 1.341268  | C                                                          | 0.028984  | 3.619661  | 3.459542  |
| C | -1.780202 | -0.979459 | 2.495196  | H                                                          | -0.749911 | 4.320700  | 3.798901  |
| H | -0.869198 | -0.379670 | 2.617505  | C                                                          | -0.383555 | 2.376740  | 2.934823  |
| C | -2.759975 | -0.963238 | 3.498444  | C                                                          | 3.130451  | 0.940776  | 2.063416  |
| H | -2.599058 | -0.336661 | 4.391370  | H                                                          | 2.662055  | 0.113694  | 1.495601  |
| C | -3.930409 | -1.739512 | 3.412830  | C                                                          | 4.073920  | 1.672327  | 1.093974  |
| C | -4.078449 | -2.551275 | 2.267125  | H                                                          | 3.537113  | 2.033476  | 0.195759  |
| H | -4.978614 | -3.178466 | 2.159469  | H                                                          | 4.872648  | 0.986523  | 0.748016  |
| C | -3.112856 | -2.573414 | 1.257881  | H                                                          | 4.575685  | 2.538525  | 1.571990  |
| H | -3.253786 | -3.219816 | 0.381237  | C                                                          | 3.928656  | 0.328511  | 3.228592  |
| C | -4.983870 | -1.713989 | 4.491158  | H                                                          | 4.374266  | 1.119196  | 3.867593  |
| H | -4.674957 | -1.082547 | 5.347069  | H                                                          | 4.757339  | -0.298922 | 2.842313  |
| H | -5.196422 | -2.731898 | 4.880542  | H                                                          | 3.299441  | -0.315346 | 3.872708  |
| H | -5.946731 | -1.311990 | 4.109363  | C                                                          | -1.897923 | 2.175261  | 2.838106  |
| C | -0.625140 | -3.033399 | -0.249004 | H                                                          | -2.327608 | 3.074837  | 3.329647  |
| C | -0.189451 | -3.130298 | -1.592240 | C                                                          | -2.477106 | 0.975852  | 3.600511  |
| H | -0.220046 | -2.245740 | -2.239348 | H                                                          | -2.114514 | 0.010304  | 3.208577  |
| C | 0.282736  | -4.339557 | -2.120585 | H                                                          | -3.581270 | 0.966536  | 3.499545  |
| H | 0.620466  | -4.363057 | -3.169398 | H                                                          | -2.241924 | 1.035807  | 4.682537  |
| C | 0.318558  | -5.516728 | -1.351741 | C                                                          | -2.361392 | 2.220344  | 1.376073  |
| C | -0.142126 | -5.425820 | -0.018417 | H                                                          | -2.058558 | 3.168688  | 0.892038  |
| H | -0.131002 | -6.326959 | 0.616641  | H                                                          | -3.464646 | 2.122362  | 1.311519  |
| C | -0.594824 | -4.223012 | 0.527892  | H                                                          | -1.918810 | 1.398974  | 0.785032  |
| H | -0.926244 | -4.187231 | 1.575016  | H                                                          | 1.027291  | -3.061444 | -0.716389 |
|   |           |           |           | C                                                          | 0.003592  | -3.637316 | -1.537748 |

|   |           |           |           |   |           |           |           |
|---|-----------|-----------|-----------|---|-----------|-----------|-----------|
| C | 0.351291  | -4.158196 | -2.796795 | V | 0.332629  | -0.340136 | 0.038918  |
| H | -0.440046 | -4.582405 | -3.432097 | O | -1.318444 | 2.287809  | -0.505452 |
| C | 1.675121  | -4.162022 | -3.243974 | O | -2.259129 | 1.751296  | -2.556145 |
| H | 1.930954  | -4.565513 | -4.235245 | N | 2.098685  | 0.603033  | -0.057536 |
| C | 2.675532  | -3.690894 | -2.393436 | N | 1.056994  | -2.112095 | -0.466313 |
| H | 3.728456  | -3.753898 | -2.712531 | N | -0.687980 | -0.513994 | 1.719852  |
| C | 2.398159  | -3.148450 | -1.118459 | N | -0.759149 | 0.092619  | -1.444920 |
| C | -1.437873 | -3.805148 | -1.069827 | H | -1.003850 | -0.601079 | -2.158097 |
| H | -1.586781 | -3.159027 | -0.184860 | C | 3.281031  | -0.079403 | -0.062398 |
| C | -1.700510 | -5.264468 | -0.644241 | C | 3.373228  | -1.483010 | -0.110923 |
| H | -2.716734 | -5.355867 | -0.208818 | H | 4.389891  | -1.890100 | -0.030609 |
| H | -0.973274 | -5.629152 | 0.103746  | C | 2.361578  | -2.440949 | -0.364598 |
| H | -1.644129 | -5.945209 | -1.519385 | C | 4.583416  | 0.690944  | -0.016491 |
| C | -2.478904 | -3.401776 | -2.124409 | H | 4.685882  | 1.366812  | -0.887782 |
| H | -2.312004 | -2.378096 | -2.504250 | H | 5.446124  | 0.000933  | -0.003772 |
| H | -3.493129 | -3.433942 | -1.681418 | H | 4.629772  | 1.338770  | 0.878885  |
| H | -2.472251 | -4.095431 | -2.991018 | C | 2.812674  | -3.878361 | -0.490106 |
| C | 3.666271  | -2.760278 | -0.333104 | H | 2.044728  | -4.521736 | -0.954950 |
| H | 4.374703  | -3.575381 | -0.600955 | H | 3.032417  | -4.285923 | 0.518999  |
| C | 3.619015  | -2.749028 | 1.197234  | H | 3.748261  | -3.947317 | -1.077895 |
| H | 2.993397  | -1.934410 | 1.602555  | C | 2.186923  | 2.006211  | -0.395375 |
| H | 4.647068  | -2.600359 | 1.585989  | C | 2.299132  | 2.326148  | -1.784180 |
| H | 3.248892  | -3.706032 | 1.608969  | C | 2.567380  | 3.654461  | -2.161125 |
| C | 4.311513  | -1.463484 | -0.859910 | H | 2.675737  | 3.896413  | -3.229274 |
| H | 4.377717  | -1.966065 | -0.966065 | C | 2.697389  | 4.666422  | -1.206994 |
| H | 5.340672  | -1.358205 | -0.459093 | H | 2.917254  | 5.700077  | -1.513812 |
| H | 3.742191  | -0.570705 | -0.542184 | C | 2.518790  | 4.352966  | 0.143525  |
| C | -1.811129 | 0.239455  | -1.897663 | H | 2.588667  | 5.149792  | 0.900973  |
| C | -1.043529 | -0.206490 | -2.998765 | C | 2.260048  | 3.038853  | 0.587284  |
| H | -0.378716 | -1.072492 | -2.866648 | C | 2.159619  | 1.269811  | -2.879241 |
| C | -1.128322 | 0.430644  | -4.241870 | H | 1.731737  | 0.367602  | -2.402083 |
| H | -0.518124 | 0.055293  | -5.078903 | C | 1.176126  | 1.714454  | -3.973797 |
| C | -1.986323 | 1.530996  | -4.448524 | H | 0.173595  | 1.935721  | -3.559465 |
| C | -2.746332 | 1.975847  | -3.347220 | H | 1.053093  | 0.911509  | -4.727546 |
| H | -3.420596 | 2.838809  | -3.471394 | H | 1.536440  | 2.613848  | -4.514123 |
| C | -2.657564 | 1.354405  | -2.095201 | C | 3.513545  | 0.873551  | -3.494592 |
| H | -3.251604 | 1.734203  | -1.253075 | H | 4.026544  | 1.751615  | -3.940071 |
| C | -2.051381 | 2.232950  | -5.780890 | H | 3.366779  | 0.124879  | -4.300769 |
| H | -1.887590 | 1.530707  | -6.622452 | H | 4.192851  | 0.424025  | -2.745644 |
| H | -1.266264 | 3.017597  | -5.857005 | C | 2.038066  | 2.875526  | 2.092533  |
| H | -3.027806 | 2.733623  | -5.933790 | H | 2.252350  | 3.880824  | 2.515844  |
| C | -2.853491 | -0.924536 | -0.020198 | C | 2.982689  | 1.907261  | 2.817891  |
| C | -2.725537 | -1.551806 | 1.247834  | H | 2.869930  | 0.867774  | 2.463920  |
| H | -1.742066 | -1.609617 | 1.739717  | H | 2.753550  | 1.902292  | 3.902754  |
| C | -3.820651 | -2.126200 | 1.898512  | H | 4.042014  | 2.213929  | 2.701561  |
| H | -3.661525 | -2.603561 | 2.879168  | C | 0.564022  | 2.580460  | 2.399813  |
| C | -5.112323 | -2.103821 | 1.334147  | H | -0.100565 | 3.355723  | 1.973150  |
| C | -5.241111 | -1.486321 | 0.073368  | H | 0.396970  | 2.528299  | 3.495443  |
| H | -6.229754 | -1.461991 | -0.413939 | H | 0.250093  | 1.612413  | 1.969419  |
| C | -4.151717 | -0.913671 | -0.594134 | C | 0.083026  | -3.067778 | -0.929661 |
| H | -4.302149 | -0.477836 | -1.590602 | C | -0.615713 | -3.910465 | -0.017489 |
| C | -6.301064 | -2.685245 | 2.056824  | C | -1.608373 | -4.770067 | -0.528971 |
| H | -6.797004 | -1.929321 | 2.705077  | H | -2.154295 | -5.422104 | 0.169431  |
| H | -6.007730 | -3.529040 | 2.713348  | C | -1.906895 | -4.816427 | -1.893316 |
| H | -7.069455 | -3.055479 | 1.348614  | H | -2.689633 | -5.493338 | -2.267941 |
| C | 0.727336  | 3.843248  | -1.190205 | C | -1.195662 | -4.002228 | -2.782605 |
| C | 1.725310  | 3.596717  | -2.401983 | H | -1.420213 | -4.051316 | -3.857961 |
| C | 1.395421  | 4.518199  | 0.010262  | C | -0.195251 | -3.123091 | -2.330372 |
| H | 0.724492  | 4.438391  | 0.886107  | C | -0.295572 | -3.967473 | 1.470732  |
| H | 1.600789  | 5.589277  | -0.183629 | H | 0.379598  | -3.122662 | 1.703132  |
| H | 2.345057  | 4.019025  | 0.278500  | C | 0.437572  | -5.274005 | 1.833628  |
| C | -0.552051 | 4.585292  | -1.567629 | H | 0.735716  | -5.258298 | 2.901953  |
| H | -1.147080 | 4.014289  | -2.303208 | H | 1.348662  | -5.431195 | 1.226822  |
| H | -0.317626 | 5.584984  | -1.985138 | H | -0.220413 | -6.154778 | 1.679020  |
| H | -1.175575 | 4.730823  | -0.663376 | C | -1.542263 | -3.821992 | 2.356493  |
| C | 1.008043  | 3.488237  | -3.751836 | H | -2.120024 | -2.911090 | 2.114928  |
| H | 1.728663  | 3.124779  | -4.510531 | H | -1.242052 | -3.754391 | 3.420562  |
| H | 0.610324  | 4.465717  | -4.088324 | H | -2.220300 | -4.695111 | 2.253597  |
| H | 0.174354  | 2.763724  | -3.696656 | C | 0.599976  | -2.297300 | -3.339776 |
| C | 2.875888  | 4.595285  | -2.490883 | H | 1.002705  | -1.421768 | -2.792811 |
| H | 3.499540  | 4.584707  | -1.578216 | C | -0.255065 | -1.770743 | -4.502439 |
| H | 2.493895  | 5.624129  | -2.646959 | H | -0.624806 | -2.591311 | -5.150698 |
| H | 3.524674  | 4.336239  | -3.350592 | H | 0.347323  | -1.098899 | -5.145611 |
| B | 1.366500  | 1.643533  | -1.275010 | H | -1.135899 | -1.194784 | -4.153013 |
|   |           |           |           | C | 1.801481  | -3.091988 | -3.883693 |
|   |           |           |           | H | 2.483661  | -3.413880 | -3.075603 |
|   |           |           |           | H | 2.387859  | -2.473847 | -4.594638 |
|   |           |           |           | H | 1.460559  | -4.001620 | -4.420704 |
|   |           |           |           | C | -2.054956 | -0.136401 | 1.689812  |
|   |           |           |           | C | -2.569634 | 0.908159  | 2.491335  |
|   |           |           |           | H | -1.893530 | 1.450295  | 3.166018  |
|   |           |           |           | C | -3.924912 | 1.257320  | 2.432319  |
|   |           |           |           | H | -4.297304 | 2.073409  | 3.072644  |
|   |           |           |           | C | -4.820757 | 0.597469  | 1.566616  |
|   |           |           |           | C | -4.299630 | -0.433976 | 0.757122  |
|   |           |           |           | H | -4.970024 | -0.972020 | 0.067847  |
|   |           |           |           | C | -2.950300 | -0.799183 | 0.817787  |
|   |           |           |           | H | -2.569811 | -1.613242 | 0.183917  |
|   |           |           |           | C | -6.269371 | 1.003826  | 1.472963  |
|   |           |           |           | H | -6.600074 | 1.555495  | 2.374714  |
|   |           |           |           | H | -6.933262 | 0.125357  | 1.343597  |

Conformation 33.

Multiplicity: 3

Charge: 0

E(B97-3c) = -3245.801500718708 Hartree

E(M06/def2-TZVP) = -3245.826601295537 Hartree

E(PBE - D3(BJ)/def2-TZVP) = -3244.540771413405 Hartree

E(PBE0 - D3(BJ)/def2-TZVP) = -3244.788119946165 Hartree

E(PBEh-3c) = -3241.116327243312 Hartree

E(PM6) = -142.54922 Kcal/mol

E(PM7) = -168.05699 Kcal/mol

E( $\omega$ B97X-V/def2-TZVP) = -3246.872871599081 Hartree

E(GFN1-xTB) = -165.441943619768 Hartree

E(GFN2-xTB) = -162.841266423987 Hartree

E(GFN-FF) = -22.324196416754 Hartree

Coordinates:

|   |           |           |           |   |           |           |           |
|---|-----------|-----------|-----------|---|-----------|-----------|-----------|
| H | -6.442097 | 1.668659  | 0.597916  | H | 4.567299  | 1.344870  | -1.588713 |
| C | -0.077636 | -0.877305 | 2.923754  | C | 3.883411  | 1.783358  | 0.371272  |
| C | 1.307465  | -1.194554 | 2.925835  | H | 3.033534  | 1.644228  | 1.062436  |
| H | 1.890588  | -1.131788 | 1.993746  | H | 4.030394  | 2.876295  | 0.263779  |
| C | 1.963200  | -1.610305 | 4.088151  | H | 4.797863  | 1.369134  | 0.842323  |
| H | 3.038593  | -1.845707 | 4.033258  | C | 2.499501  | 1.813884  | -1.783530 |
| C | 1.285246  | -1.730794 | 5.318280  | H | 2.394346  | 1.369515  | -2.792216 |
| C | -0.091980 | -1.427970 | 5.315158  | H | 2.682471  | 2.901943  | -1.892298 |
| H | -0.665859 | -1.527518 | 6.251302  | H | 1.533313  | 1.690143  | -1.261652 |
| C | -0.764183 | -1.015791 | 4.158587  | C | -2.336188 | -0.640195 | 2.344414  |
| H | -1.844134 | -0.821854 | 4.203839  | C | -3.111235 | 0.556407  | 2.512354  |
| C | 2.001910  | -2.134572 | 6.581931  | C | -4.511800 | 0.461435  | 2.593582  |
| H | 2.327915  | -1.247834 | 7.169291  | H | -5.102442 | 1.378427  | 2.719688  |
| H | 2.911115  | -2.729931 | 6.364036  | C | -5.167508 | -0.769334 | 2.530154  |
| H | 1.351060  | -2.737600 | 7.247199  | H | -6.264406 | -0.824902 | 2.597408  |
| C | -1.971549 | 3.498529  | -0.971176 | C | -4.406949 | -1.928017 | 2.395051  |
| C | -2.943387 | 2.949032  | -2.099681 | H | -4.913867 | -2.905554 | 2.360808  |
| C | -0.884994 | 4.426959  | -1.519721 | C | -2.996220 | -1.912273 | 2.302287  |
| H | -0.118975 | 4.590487  | -0.738212 | C | -2.473145 | 1.934531  | 2.660812  |
| H | -1.299325 | 5.409964  | -1.818200 | H | -1.580326 | 1.948032  | 2.007437  |
| H | -0.372135 | 3.979382  | -2.392031 | C | -2.008466 | 2.200086  | 4.104221  |
| C | -2.683195 | 4.152813  | 0.210213  | H | -1.538245 | 3.201559  | 4.174615  |
| H | -3.328769 | 3.429683  | 0.740784  | H | -1.262608 | 1.463506  | 4.448809  |
| H | -3.298090 | 5.011123  | -0.127439 | H | -2.868019 | 2.167270  | 4.806429  |
| H | -1.933892 | 4.532691  | 0.932429  | C | -3.382892 | 3.084449  | 2.207127  |
| C | -4.301428 | 2.503138  | -1.546554 | H | -3.763051 | 2.934788  | 1.178128  |
| H | -4.840204 | 1.940044  | -2.333706 | H | -2.814536 | 4.034845  | 2.252122  |
| H | -4.928068 | 3.364091  | -1.241369 | H | -4.249122 | 3.221364  | 2.887590  |
| H | -4.167245 | 1.833607  | -0.676011 | C | -2.405689 | -3.323058 | 2.119516  |
| C | -3.131115 | 3.886078  | -3.289155 | H | -3.160954 | -3.973580 | 2.611125  |
| H | -2.172123 | 4.097598  | -3.796549 | C | -1.079967 | -3.674718 | 2.798507  |
| H | -3.581199 | 4.846640  | -2.967088 | H | -0.222677 | -3.103837 | 2.402116  |
| H | -3.812334 | 3.418804  | -4.027358 | H | -0.864985 | -4.750422 | 2.634444  |
| B | -1.434852 | 1.340672  | -1.515828 | H | -1.128911 | -3.515202 | 3.891480  |
|   |           |           |           | C | -2.407895 | -3.743307 | 0.638061  |
|   |           |           |           | H | -3.382078 | -3.525627 | 0.156590  |
|   |           |           |           | H | -2.222190 | -4.833186 | 0.547984  |
|   |           |           |           | H | -1.621766 | -3.222600 | 0.063230  |
|   |           |           |           | C | -0.996124 | 2.693349  | -0.835606 |
|   |           |           |           | C | -1.123156 | 2.131989  | -2.126320 |
|   |           |           |           | H | -0.554796 | 1.228809  | -2.382088 |
|   |           |           |           | C | -1.938432 | 2.732567  | -3.093650 |
|   |           |           |           | H | -2.006642 | 2.271301  | -4.093154 |
|   |           |           |           | C | -2.648942 | 3.922019  | -2.837611 |
|   |           |           |           | C | -2.494650 | 4.495790  | -1.558865 |
|   |           |           |           | H | -3.022498 | 5.433228  | -1.318758 |
|   |           |           |           | C | -1.690712 | 3.901401  | -0.580505 |
|   |           |           |           | H | -1.587793 | 4.381739  | 0.401580  |
|   |           |           |           | C | -3.546273 | 4.542350  | -3.878275 |
|   |           |           |           | H | -3.158996 | 4.375665  | -4.903723 |
|   |           |           |           | H | -3.655955 | 5.634672  | -3.726647 |
|   |           |           |           | H | -4.568220 | 4.104798  | -3.844495 |
|   |           |           |           | C | 0.598603  | 2.893886  | 0.979488  |
|   |           |           |           | C | 1.172477  | 4.109618  | 0.519081  |
|   |           |           |           | H | 0.943312  | 4.460412  | -0.496632 |
|   |           |           |           | C | 2.032920  | 4.850779  | 1.331831  |
|   |           |           |           | H | 2.462254  | 5.786243  | 0.936645  |
|   |           |           |           | C | 2.386052  | 4.426796  | 2.633100  |
|   |           |           |           | H | 1.822585  | 3.220090  | 3.084980  |
|   |           |           |           | C | 2.067849  | 2.847677  | 4.092743  |
|   |           |           |           | C | 0.939258  | 2.478403  | 2.289045  |
|   |           |           |           | H | 0.510524  | 1.555655  | 2.700290  |
|   |           |           |           | C | 3.309445  | 5.247528  | 3.497230  |
|   |           |           |           | H | 2.814577  | 6.175471  | 3.857392  |
|   |           |           |           | H | 4.215043  | 5.565335  | 2.939983  |
|   |           |           |           | H | 3.641112  | 4.681837  | 4.389919  |
|   |           |           |           | C | -1.210651 | -1.976065 | -4.238440 |
|   |           |           |           | C | 0.246921  | -1.348040 | -4.136213 |
|   |           |           |           | C | -2.243216 | -1.007284 | -4.828908 |
|   |           |           |           | H | -3.253919 | -1.439036 | -4.693104 |
|   |           |           |           | H | -2.079392 | -0.832335 | -5.910203 |
|   |           |           |           | H | -2.222315 | -0.032631 | -4.303504 |
|   |           |           |           | C | -1.271550 | -3.317945 | -4.963227 |
|   |           |           |           | H | -0.645612 | -4.078484 | -4.461648 |
|   |           |           |           | H | -0.930824 | -3.215117 | -6.012976 |
|   |           |           |           | H | -2.315530 | -3.688122 | -4.975215 |
|   |           |           |           | C | 1.363636  | -2.393499 | -4.168416 |
|   |           |           |           | H | 2.315698  | -1.909772 | -3.879768 |
|   |           |           |           | H | 1.481076  | -2.832897 | -5.178470 |
|   |           |           |           | H | 1.179754  | -3.210789 | -3.446460 |
|   |           |           |           | C | 0.538070  | -0.250021 | -5.158991 |
|   |           |           |           | H | -0.155582 | 0.604116  | -5.053107 |
|   |           |           |           | H | 0.464954  | -0.642577 | -6.192996 |
|   |           |           |           | H | 1.568174  | 0.129195  | -5.009313 |
|   |           |           |           | B | -0.812117 | -1.299074 | -2.092722 |

Conformation 34.

Multiplicity: 3

Charge: 0

E(B97-3c) = -3245.778711502396 Hartree

E(M06/def2-TZVP) = -3245.806681454457 Hartree

E(PBE - D3(BJ)/def2-TZVP) = -3244.520070438693 Hartree

E(PBE0 - D3(BJ)/def2-TZVP) = -3244.767505271749 Hartree

E(PBEh-3c) = -3241.092875854910 Hartree

E(PM6) = -136.36198 Kcal/mol

E(PM7) = -152.75292 Kcal/mol

E( $\omega$ B97X-V/def2-TZVP) = -3246.851627098034 Hartree

E(GFN1-xTB) = -165.421141429348 Hartree

E(GFN2-xTB) = -162.814203654987 Hartree

E(GFN-FF) = -22.309508032722 Hartree

Coordinates:

|   |           |           |           |
|---|-----------|-----------|-----------|
| V | -0.091688 | 0.118184  | 0.473959  |
| O | -1.575977 | -2.180524 | -2.849755 |
| O | 0.241233  | -0.747144 | -2.815797 |
| N | 1.727055  | -0.648182 | 0.770843  |
| N | -0.898487 | -0.530795 | 2.213503  |
| N | -0.204260 | 2.075068  | 0.162540  |
| N | -1.080398 | -0.953724 | -0.739662 |
| H | -1.968041 | -1.322479 | -0.377191 |
| C | 2.155775  | -0.862204 | 2.047981  |
| C | 1.315311  | -0.834507 | 3.179482  |
| H | 1.830362  | -0.977593 | 4.139070  |
| C | -0.097853 | -0.768926 | 3.275219  |
| C | 3.625107  | -1.121780 | 2.302743  |
| H | 4.046227  | -1.864052 | 1.599025  |
| H | 3.794038  | -1.470162 | 3.337421  |
| H | 4.199464  | -0.185949 | 2.149689  |
| C | -0.665792 | -0.983758 | 4.663552  |
| H | -1.769101 | -0.964181 | 4.679859  |
| H | -0.288978 | -0.196514 | 5.347659  |
| H | -0.320038 | -1.951845 | 5.075059  |
| C | 2.569476  | -1.166190 | -0.289991 |
| C | 2.501292  | -2.576371 | -0.523046 |
| C | 3.409377  | -3.175070 | -1.413741 |
| H | 3.371540  | -4.264264 | -1.564896 |
| C | 4.353729  | -2.416599 | -2.107311 |
| H | 5.064932  | -2.897330 | -2.795834 |
| C | 4.368055  | -1.032636 | -1.924909 |
| H | 5.092502  | -0.419374 | -2.483741 |
| C | 3.498939  | -0.372690 | -1.029048 |
| C | 1.508644  | -3.484051 | 0.196317  |
| H | 0.751622  | -2.831645 | 0.672974  |
| C | 0.764623  | -4.413262 | -0.776435 |
| H | 0.177882  | -3.841718 | -1.521956 |
| H | 0.058199  | -5.060840 | -0.221786 |
| H | 1.458651  | -5.084970 | -1.321661 |
| C | 2.197669  | -4.306461 | 1.300951  |
| H | 3.010497  | -4.933689 | 0.879354  |
| H | 1.471248  | -4.982504 | 1.795137  |
| H | 2.639819  | -3.661430 | 2.083987  |
| C | 3.642949  | 1.148872  | -1.003353 |

**OQOQOB**

Conformation 1.

Multiplicity: 2

Charge: 0  
 E(B97-3c) = -6287.334539666292 Hartree  
 E(M06/def2-TZVP) = -6287.327396830854 Hartree  
 E(PBE - D3(BJ)/def2-TZVP) = -6285.147511291824 Hartree  
 E(PBE0 - D3(BJ)/def2-TZVP) = -6285.322362667313 Hartree  
 E(PBEh-3c) = -6277.924860852325 Hartree  
 E(PM6) = 262.06750 Kcal/mol  
 E(PM7) = 121.09013 Kcal/mol  
 E( $\omega$ B97X-V/def2-TZVP) = -6289.218225469356 Hartree  
 E(GFN1-xTB) = -298.847191368280 Hartree  
 E(GFN2-xTB) = -290.685712758847 Hartree  
 E(GFN-FF) = -36.545250644598 Hartree

Coordinates:

|    |           |           |           |   |            |           |           |
|----|-----------|-----------|-----------|---|------------|-----------|-----------|
| Cu | 0.165046  | -1.124304 | -0.702265 | N | -4.426615  | -0.097347 | 1.314330  |
| N  | 1.120164  | 0.207456  | -1.893151 | H | -3.768084  | -0.645966 | 0.749374  |
| N  | -0.423841 | 0.395384  | 0.496491  | C | -5.394274  | 0.470653  | 0.510656  |
| N  | -0.834468 | -2.448053 | 0.471405  | O | -5.449589  | 0.127638  | -0.677083 |
| N  | 0.844072  | -2.654649 | -1.846764 | C | -6.367847  | 1.485302  | 1.028823  |
| C  | 1.831796  | -0.080461 | -3.038626 | C | -7.705966  | 1.333028  | 0.576981  |
| C  | 2.307309  | 1.145040  | -3.650903 | H | -7.934052  | 0.444703  | -0.029007 |
| H  | 2.878579  | 1.194429  | -4.584260 | C | -8.682052  | 2.268378  | 0.862154  |
| C  | 1.907869  | 2.174738  | -2.837686 | H | -9.717992  | 2.132052  | 0.517297  |
| H  | 2.079228  | 3.248970  | -2.962553 | C | -8.337678  | 3.433177  | 1.599826  |
| C  | 1.195360  | 1.576172  | -1.725618 | C | -9.288281  | 4.444479  | 1.918478  |
| C  | 0.718944  | 2.299478  | -0.616339 | H | -10.330544 | 4.317002  | 1.585489  |
| C  | -0.007775 | 1.709709  | 0.437758  | C | -8.897116  | 5.563877  | 2.633166  |
| C  | -0.497413 | 2.436137  | 1.593073  | H | -9.611228  | 6.360492  | 2.889339  |
| H  | -0.282799 | 3.488320  | 1.807502  | C | -7.538697  | 5.662560  | 3.037916  |
| C  | -1.267452 | 1.559096  | 2.313902  | H | -7.198806  | 6.540945  | 3.616444  |
| H  | -1.813866 | 1.730163  | 3.246754  | N | -6.624102  | 4.746882  | 2.760969  |
| C  | -1.214248 | 0.290433  | 1.620002  | C | -6.979267  | 3.641580  | 2.051562  |
| C  | -1.889737 | -0.862609 | 2.062245  | O | -5.975119  | 2.646633  | 1.730494  |
| C  | -1.678017 | -2.143884 | 1.522572  | C | -4.669847  | 2.729625  | 2.032493  |
| C  | -2.236118 | -3.357396 | 2.084113  | C | -4.019330  | 3.870931  | 2.606050  |
| H  | -2.939203 | -3.389739 | 2.923495  | H | -4.192832  | 4.784232  | 2.010564  |
| C  | -1.668215 | -4.403393 | 1.401580  | H | -2.945572  | 3.615803  | 2.574588  |
| H  | -1.811471 | -5.476596 | 1.562193  | H | -4.354435  | 4.044946  | 3.644910  |
| C  | -0.813330 | -3.824516 | 0.381569  | C | 0.017272   | -6.057789 | -0.347452 |
| C  | -0.075033 | -4.578640 | -0.554721 | C | 1.226077   | -6.611435 | 0.173568  |
| C  | 0.670740  | -4.003888 | -1.604196 | C | 1.298651   | -7.990576 | 0.464859  |
| C  | 1.421123  | -4.782107 | -2.571752 | H | 2.228655   | -8.384396 | 0.892646  |
| H  | 1.436145  | -5.876757 | -2.613601 | C | 0.192963   | -8.813471 | 0.214336  |
| C  | 2.076158  | -3.887011 | -3.378593 | H | 0.263820   | -9.887705 | 0.443410  |
| H  | 2.745482  | -4.093734 | -4.219857 | C | -0.991592  | -8.286058 | -0.322867 |
| C  | 1.704501  | -2.560884 | -2.922080 | H | -1.853267  | -8.939052 | -0.525295 |
| C  | 2.181944  | -1.367775 | -3.497749 | C | -1.071357  | -6.912240 | -0.594921 |
| C  | 1.026736  | 3.755774  | -0.501302 | H | -1.994884  | -6.477950 | -1.006605 |
| C  | -0.016477 | 4.726959  | -0.519152 | N | 2.312276   | -5.743882 | 0.357987  |
| C  | 0.289700  | 6.077712  | -0.238928 | H | 2.155228   | -4.788180 | 0.027819  |
| H  | -0.528362 | 6.806752  | -0.214367 | C | 3.572491   | -5.982679 | 0.874970  |
| C  | 1.614138  | 6.460814  | 0.007626  | O | 3.934094   | -7.031389 | 1.399050  |
| H  | 1.834091  | 7.518303  | 0.220028  | C | 4.502560   | -4.806413 | 0.668885  |
| C  | 2.654335  | 5.518274  | -0.025520 | C | 4.873707   | -4.408458 | -0.647946 |
| H  | 3.695206  | 5.821209  | 0.161600  | H | 4.413538   | -4.918662 | -1.508116 |
| C  | 2.352660  | 4.173534  | -0.277033 | C | 5.818119   | -3.414827 | -0.852979 |
| H  | 3.148386  | 3.414689  | -0.273943 | H | 6.119277   | -3.125761 | -1.870886 |
| N  | -1.308116 | 4.297874  | -0.850779 | C | 6.400682   | -2.746560 | 0.262006  |
| H  | -1.401504 | 3.402550  | -1.353357 | C | 7.362749   | -1.704570 | 0.125890  |
| C  | -2.506096 | 4.893612  | -0.515139 | H | 7.714334   | -1.418616 | -0.877492 |
| O  | -2.579713 | 5.910953  | 0.183967  | C | 7.819183   | -1.046374 | 1.255980  |
| C  | -3.753325 | 4.245270  | -1.069130 | H | 8.546036   | -0.224647 | 1.180618  |
| C  | -4.959649 | 4.940293  | -0.760330 | C | 7.307345   | -1.433540 | 2.524078  |
| H  | -4.847270 | 5.845384  | -0.146370 | H | 7.641638   | -0.901425 | 3.433672  |
| C  | -6.197098 | 4.501831  | -1.184406 | N | 6.433967   | -2.414224 | 2.702172  |
| H  | -7.115577 | 5.036170  | -0.899050 | C | 5.987338   | -3.088225 | 1.602922  |
| C  | -6.285625 | 3.358608  | -2.025234 | C | 5.031864   | -4.151423 | 1.784888  |
| C  | -7.517013 | 2.875589  | -2.549325 | O | 4.529945   | -4.473121 | 3.003570  |
| H  | -8.452845 | 3.372672  | -2.250339 | C | 5.433398   | -4.972549 | 3.995134  |
| C  | -7.516853 | 1.803040  | -3.423981 | H | 5.857729   | -5.944404 | 3.662819  |
| H  | -8.452173 | 1.405359  | -3.845204 | C | 4.827757   | -5.136753 | 4.905817  |
| C  | -6.268545 | 1.230228  | -3.791074 | H | 6.237465   | -4.240252 | 4.206010  |
| H  | -6.240256 | 0.399406  | -4.519680 | C | 3.256289   | -1.468496 | -4.533473 |
| N  | -5.105894 | 1.635942  | -3.311455 | C | 4.596707   | -1.132290 | -4.165882 |
| C  | -5.088097 | 2.656354  | -2.411961 | C | 5.631262   | -1.243446 | -5.120409 |
| C  | -3.821497 | 3.069296  | -1.850715 | H | 6.650084   | -0.974775 | -4.817367 |
| O  | -2.670687 | 2.390766  | -2.091340 | C | 5.337792   | -1.680115 | -6.419255 |
| C  | -2.613967 | 0.971969  | -2.346598 | H | 6.154353   | -1.760752 | -7.152900 |
| H  | -3.446379 | 0.445668  | -1.842606 | C | 4.026163   | -2.014770 | -6.789106 |
| H  | -1.638180 | 0.646680  | -1.936708 | H | 3.802915   | -2.355341 | -7.810896 |
| H  | -2.669953 | 0.773557  | -3.431685 | C | 2.996043   | -1.908369 | -5.842179 |
| C  | -2.935364 | -0.660227 | 3.114037  | H | 1.959849   | -2.160609 | -6.113697 |
| C  | -4.216189 | -0.193852 | 2.695847  | N | 4.807791   | -0.682789 | -2.856407 |
| C  | -5.203778 | 0.080364  | 3.663606  | H | 4.007380   | -0.761628 | -2.214791 |
| H  | -6.198742 | 0.418076  | 3.345060  | C | 5.882541   | 0.004766  | -2.338213 |
| C  | -4.921024 | -0.098314 | 5.023399  | O | 6.973830   | 0.107742  | -2.910005 |
| H  | -5.702597 | 0.123089  | 5.765946  | C | 5.621596   | 0.725026  | -1.034793 |
| C  | -3.667046 | -0.571502 | 5.442151  | C | 6.547705   | 1.765611  | -0.738457 |
| H  | -3.455049 | -0.719325 | 6.511148  | H | 7.375371   | 1.890394  | -1.451779 |
| C  | -2.683728 | -0.854724 | 4.482157  | C | 6.420634   | 2.572345  | 0.375594  |
| H  | -1.690611 | -1.217263 | 4.787711  | H | 7.146012   | 3.374768  | 0.578402  |
|    |           |           |           | C | 5.310224   | 2.398602  | 1.248167  |
|    |           |           |           | C | 5.041331   | 3.260025  | 2.349819  |
|    |           |           |           | H | 5.751438   | 4.070050  | 2.579299  |
|    |           |           |           | C | 3.884640   | 3.088652  | 3.091527  |
|    |           |           |           | H | 3.641023   | 3.752265  | 3.934045  |
|    |           |           |           | C | 2.997257   | 2.036918  | 2.732984  |
|    |           |           |           | H | 2.053305   | 1.894870  | 3.289323  |
|    |           |           |           | N | 3.226830   | 1.193966  | 1.739305  |
|    |           |           |           | C | 4.356633   | 1.345991  | 0.993694  |
|    |           |           |           | C | 4.565412   | 0.469739  | -0.134763 |
|    |           |           |           | O | 3.736387   | -0.564508 | -0.409682 |
|    |           |           |           | C | 3.057091   | -1.324547 | 0.601673  |
|    |           |           |           | H | 3.681496   | -1.421488 | 1.509750  |
|    |           |           |           | H | 2.895062   | -2.320134 | 0.148643  |

|                                                            |           |           |           |   |           |           |           |
|------------------------------------------------------------|-----------|-----------|-----------|---|-----------|-----------|-----------|
| H                                                          | 2.096370  | -0.850217 | 0.875961  | C | 0.928076  | -7.108192 | 2.182819  |
|                                                            |           |           |           | H | 1.378990  | -7.765527 | 2.941248  |
|                                                            |           |           |           | C | 1.055685  | -5.717178 | 2.293746  |
| Conformation 10.                                           |           |           |           | H | 1.601213  | -5.275777 | 3.138744  |
| Multiplicity: 2                                            |           |           |           | N | -0.785153 | -4.525653 | -0.697528 |
| Charge: 0                                                  |           |           |           | H | -0.607043 | -3.531438 | -0.526460 |
| E(B97-3c) = -6287.340214950242 Hartree                     |           |           |           | C | -1.532603 | -4.826697 | -1.823544 |
| E(M06/def2-TZVP) = -6287.333843592487 Hartree              |           |           |           | O | -1.798056 | -5.975544 | -2.197920 |
| E(PBE - D3(BJ)/def2-TZVP) = -6285.150703789915 Hartree     |           |           |           | C | -2.036103 | -3.615525 | -2.564912 |
| E(PBE0 - D3(BJ)/def2-TZVP) = -6285.330952676737 Hartree    |           |           |           | C | -2.813064 | -2.612029 | -1.915314 |
| E(PBEh-3c) = -6277.940909811078 Hartree                    |           |           |           | H | -2.979537 | -2.683840 | -0.828153 |
| E(PM6) = 241.98631 Kcal/mol                                |           |           |           | C | -3.395146 | -1.583213 | -2.640861 |
| E(PM7) = 118.77608 Kcal/mol                                |           |           |           | H | -4.033874 | -0.829751 | -2.154917 |
| E( $\omega$ B97X-V/def2-TZVP) = -6289.231338142972 Hartree |           |           |           | C | -3.192491 | -1.502700 | -4.050127 |
| E(GFN1-xTB) = -298.851199646975 Hartree                    |           |           |           | C | -3.746687 | -0.464098 | -4.851537 |
| E(GFN2-xTB) = -290.678223864397 Hartree                    |           |           |           | H | -4.378237 | 0.310671  | -4.390711 |
| E(GFN-FF) = -36.545262904680 Hartree                       |           |           |           | C | -3.464800 | -0.433749 | -6.207403 |
|                                                            |           |           |           | H | -3.869273 | 0.363746  | -6.848243 |
| Coordinates:                                               |           |           |           | C | -2.640577 | -1.450630 | -6.761895 |
| Cu                                                         | 0.970674  | 0.068310  | 1.805932  | C | -2.407237 | -1.437437 | -7.842943 |
| N                                                          | 2.373890  | 1.400704  | 1.233409  | N | -2.115348 | -2.442389 | -6.058188 |
| N                                                          | 2.221537  | -1.457550 | 1.333613  | C | -2.379116 | -2.487090 | -4.720065 |
| N                                                          | -0.525622 | -1.257833 | 2.117820  | C | -1.800453 | -3.547031 | -3.942964 |
| N                                                          | -0.286385 | 1.604701  | 2.254749  | O | -0.927496 | -4.427770 | -4.504085 |
| C                                                          | 2.217522  | 2.757378  | 1.082544  | C | -1.471694 | -5.398891 | -5.404275 |
| C                                                          | 3.456893  | 3.351766  | 0.610528  | H | -2.155641 | -6.076101 | -4.850794 |
| H                                                          | 3.596610  | 4.415069  | 0.388018  | H | -0.612512 | -5.981740 | -5.786219 |
| C                                                          | 4.375334  | 2.336787  | 0.543796  | H | -1.990519 | -4.905862 | -6.251203 |
| H                                                          | 5.423731  | 2.389810  | 0.231061  | C | -3.690185 | 0.376674  | 3.437626  |
| C                                                          | 3.686878  | 1.122178  | 0.945568  | C | -4.714038 | 0.834796  | 2.556796  |
| C                                                          | 4.301710  | -0.145216 | 1.031839  | C | -6.058958 | 0.835709  | 2.988246  |
| C                                                          | 3.585419  | -1.353266 | 1.172228  | H | -6.831396 | 1.172423  | 2.287215  |
| C                                                          | 4.173507  | -2.678465 | 1.095187  | H | -6.376710 | 0.402720  | 4.281991  |
| H                                                          | 5.242252  | -2.894299 | 1.007011  | C | -7.429373 | 0.411391  | 4.603368  |
| C                                                          | 3.136267  | -3.575506 | 1.130990  | C | -5.376460 | -0.040183 | 5.160674  |
| H                                                          | 3.183872  | -4.666739 | 1.064798  | H | -5.632002 | -0.378349 | 6.175705  |
| C                                                          | 1.922119  | -2.802877 | 1.313473  | C | -4.042392 | -0.054088 | 4.728753  |
| C                                                          | 0.641849  | -3.366133 | 1.495993  | H | -3.242131 | -0.408599 | 5.395905  |
| C                                                          | -0.488393 | -2.615960 | 1.888322  | N | -4.327564 | 1.280422  | 1.281905  |
| C                                                          | -1.777537 | -3.207614 | 2.199772  | H | -3.317839 | 1.269401  | 1.114549  |
| H                                                          | -2.017830 | -4.272454 | 2.108585  | C | -5.103976 | 1.797977  | 0.260873  |
| C                                                          | -2.584785 | -2.188085 | 2.637982  | O | -6.333914 | 1.812664  | 0.264231  |
| H                                                          | -3.626441 | -2.241289 | 2.971047  | C | -4.299849 | 2.426684  | -0.851737 |
| C                                                          | -1.787230 | -0.974644 | 2.592760  | C | -3.265322 | 3.364544  | -0.558594 |
| C                                                          | -2.271736 | 0.295978  | 2.968021  | H | -2.980548 | 3.539060  | 0.490526  |
| C                                                          | -1.543219 | 1.494849  | 2.812685  | H | -2.642679 | 4.085608  | -1.564293 |
| C                                                          | -2.093406 | 2.815491  | 3.053813  | H | -1.867565 | 4.825899  | -1.320671 |
| H                                                          | -3.066057 | 3.013127  | 3.518152  | C | -3.020787 | 3.892336  | -2.923865 |
| C                                                          | -1.186083 | 3.718761  | 2.552584  | C | -2.426648 | 4.601157  | -4.008329 |
| H                                                          | -1.259956 | 4.811034  | 2.524477  | H | -1.619226 | 5.322313  | -3.809015 |
| C                                                          | -0.060555 | 2.949957  | 2.055956  | C | -2.850771 | 4.339797  | -5.300488 |
| C                                                          | 1.074216  | 3.505083  | 1.428038  | H | -2.406672 | 4.862162  | -6.160498 |
| C                                                          | 5.788954  | -0.192531 | 0.959985  | C | -3.868895 | 3.369160  | -5.505117 |
| C                                                          | 6.599526  | 0.475024  | 1.924843  | H | -4.216638 | 3.149852  | -6.531508 |
| C                                                          | 8.004682  | 0.441116  | 1.792916  | N | -4.444921 | 2.684211  | -4.528515 |
| H                                                          | 8.612999  | 0.956284  | 2.551917  | C | -4.043568 | 2.929167  | -3.246884 |
| C                                                          | 8.618249  | -0.233114 | 0.731730  | C | -4.664364 | 2.187641  | -2.182096 |
| H                                                          | 9.715459  | -0.240043 | 0.649870  | O | -5.537973 | 1.181972  | -2.466319 |
| C                                                          | 7.828551  | -0.898118 | -0.218877 | C | -6.857295 | 1.558825  | -2.885184 |
| H                                                          | 8.296461  | -1.424075 | -1.064075 | H | -7.377189 | 2.065857  | -2.046473 |
| C                                                          | 6.433951  | -0.871909 | -0.096529 | H | -7.382163 | 0.617050  | -3.131088 |
| H                                                          | 5.806069  | -1.357674 | -0.857828 | H | -6.813377 | 2.204512  | -3.785699 |
| N                                                          | 6.069967  | 1.254045  | 2.983423  | C | 1.054837  | 4.954332  | 1.686916  |
| H                                                          | 6.432201  | 2.210178  | 3.055632  | C | 0.890406  | 5.324277  | -0.303230 |
| C                                                          | 4.998999  | 1.066623  | 3.850371  | C | 0.872736  | 6.693556  | -0.654429 |
| O                                                          | 4.551383  | 2.021328  | 4.481821  | H | 0.752849  | 6.958571  | -1.710931 |
| C                                                          | 4.524878  | -0.338967 | 4.087044  | C | 1.011969  | 7.672114  | 0.338752  |
| C                                                          | 5.465557  | -1.397295 | 4.253787  | H | 0.995828  | 8.733355  | 0.046957  |
| H                                                          | 6.532920  | -1.185235 | 4.096174  | C | 1.172313  | 7.316762  | 1.686454  |
| C                                                          | 5.061127  | -2.664317 | 4.637421  | H | 1.286830  | 8.090171  | 2.460187  |
| H                                                          | 5.798398  | -3.468910 | 4.780442  | C | 1.193850  | 5.959086  | 2.039183  |
| C                                                          | 3.682986  | -2.936615 | 4.866642  | H | 1.333760  | 5.655917  | 3.087794  |
| C                                                          | 3.193615  | -4.203959 | 5.291602  | N | 0.753824  | 4.287273  | -1.235852 |
| H                                                          | 3.905080  | -5.028198 | 5.458098  | H | 0.690785  | 3.331564  | -0.853953 |
| C                                                          | 1.833105  | -4.378853 | 5.488149  | C | 0.657273  | 4.359576  | -2.607205 |
| H                                                          | 1.421179  | -5.343825 | 5.818510  | O | 0.624699  | 5.428653  | -3.233571 |
| C                                                          | 0.958833  | -3.282171 | 5.239608  | C | 0.630094  | 3.039334  | -3.336732 |
| H                                                          | -0.131790 | -3.412765 | 5.361954  | C | 0.816596  | 3.128900  | -4.748506 |
| N                                                          | 1.370860  | -2.085382 | 4.853609  | H | 0.920266  | 4.144368  | -5.157179 |
| C                                                          | 2.709208  | -1.891014 | 4.676901  | C | 0.852503  | 2.012634  | -5.560212 |
| C                                                          | 3.159054  | -0.584291 | 4.284721  | H | 0.982673  | 2.111392  | -6.648694 |
| O                                                          | 2.245493  | 0.382797  | 4.005626  | C | 0.764287  | 0.713128  | -4.984918 |
| C                                                          | 1.585798  | 1.014371  | 5.112793  | C | 0.872261  | -0.489702 | -5.739314 |
| H                                                          | 1.040677  | 0.265220  | 5.721503  | H | 0.959034  | -0.428854 | -6.835491 |
| H                                                          | 0.864785  | 1.723465  | 4.667229  | C | 0.873046  | -1.711025 | -5.088527 |
| H                                                          | 2.335213  | 1.568640  | 5.712818  | H | 0.918132  | -2.662552 | -5.634912 |
| C                                                          | 0.487247  | -4.847462 | 1.344786  | C | 0.772133  | -1.722522 | -3.669991 |
| C                                                          | -0.230010 | -5.404924 | 0.246648  | H | 0.809156  | -2.686279 | -3.132966 |
| C                                                          | -0.357275 | -6.808819 | 0.135363  | N | 0.620264  | -0.632891 | -2.933368 |
| H                                                          | -0.907561 | -7.212460 | -0.721876 | C | 0.593526  | 0.577205  | -3.561468 |
| C                                                          | 0.217966  | -7.645388 | 1.099192  | C | 0.447077  | 1.766761  | -2.758046 |
| H                                                          | 0.106865  | -8.735442 | 0.994261  |   |           |           |           |

|   |           |           |           |   |          |           |           |
|---|-----------|-----------|-----------|---|----------|-----------|-----------|
| O | 0.184245  | 1.681000  | -1.428114 | C | 5.979436 | -1.213551 | -4.252748 |
| C | -0.749538 | 0.708624  | -0.927293 | H | 6.154647 | -1.339374 | -5.329225 |
| H | -1.493905 | 0.441153  | -1.701592 | C | 6.942011 | -1.591369 | -3.303782 |
| H | -1.249287 | 1.193417  | -0.069198 | H | 7.896424 | -2.022317 | -3.642458 |
| H | -0.223136 | -0.205021 | -0.597790 | C | 6.700093 | -1.414775 | -1.931836 |

Conformation 13.

Multiplicity: 2

Charge: 0

|                                 |                            |
|---------------------------------|----------------------------|
| E(B97-3c) =                     | -6287.358944214261 Hartree |
| E(M06/def2-TZVP) =              | -6287.353695945651 Hartree |
| E(PBE - D3(BJ)/def2-TZVP) =     | -6285.170642422631 Hartree |
| E(PBE0 - D3(BJ)/def2-TZVP) =    | -6285.349504448347 Hartree |
| E(PBEh-3c) =                    | -6277.946062151756 Hartree |
| E(PM6) =                        | 251.10809 Kcal/mol         |
| E(PM7) =                        | 107.18458 Kcal/mol         |
| E( $\omega$ B97X-V/def2-TZVP) = | -6289.250479072040 Hartree |
| E(GFN1-xTB) =                   | -298.866174704961 Hartree  |
| E(GFN2-xTB) =                   | -290.694557285923 Hartree  |
| E(GFN-FF) =                     | -36.567491303311 Hartree   |

Coordinates:

|    |           |           |           |   |           |           |           |
|----|-----------|-----------|-----------|---|-----------|-----------|-----------|
| Cu | -0.216160 | 0.790513  | -1.626642 | C | -2.490989 | 1.479587  | -4.485514 |
| N  | -2.017265 | -0.161644 | -1.792499 | H | -2.940735 | 2.339573  | -3.958070 |
| N  | 0.728322  | -0.906117 | -2.189537 | N | -1.168629 | -1.488053 | -4.537514 |
| N  | 1.588024  | 1.710995  | -1.366451 | C | -0.556147 | 0.396519  | -5.149663 |
| N  | -1.157008 | 2.466939  | -0.973839 | O | 0.885597  | 0.353837  | -5.170229 |
| C  | -3.257925 | 0.373211  | -1.515162 | C | 1.639272  | 1.353579  | -4.645455 |
| C  | -4.293274 | -0.609171 | -1.766234 | C | 1.272521  | 2.740940  | -4.622605 |
| H  | -5.366968 | -0.427805 | -1.643225 | H | 0.761967  | 3.027430  | -5.562432 |
| C  | -3.655029 | -1.761462 | -2.155746 | H | 2.231767  | 3.285985  | -4.528338 |
| H  | -4.094366 | -2.729228 | -2.418900 | H | 0.612349  | 2.967549  | -3.767835 |
| C  | -2.233609 | -1.472843 | -2.156865 | C | 1.249982  | 5.325820  | -0.239120 |
| C  | -1.230628 | -2.428802 | -2.417822 | C | 1.846244  | 5.572411  | 1.031045  |
| C  | 0.143722  | -2.126228 | -2.462691 | C | 2.315937  | 6.870224  | 1.337914  |
| C  | 1.165368  | -3.117123 | -2.741905 | H | 2.793754  | 7.037044  | 2.309604  |
| H  | 0.966178  | -4.161917 | -3.001911 | C | 2.170547  | 7.905477  | 0.405927  |
| C  | 2.373617  | -2.482982 | -2.624286 | H | 2.539900  | 8.910024  | 0.662957  |
| H  | 3.374969  | -2.899210 | -2.771915 | C | 1.560065  | 7.677681  | -0.836866 |
| C  | 2.088804  | -1.104421 | -2.266890 | H | 1.444786  | 8.495500  | -1.563437 |
| C  | 3.091788  | -0.137463 | -2.050385 | C | 1.106131  | 6.388399  | -1.148801 |
| C  | 2.831198  | 1.175921  | -1.628092 | H | 0.638441  | 6.180040  | -2.123076 |
| C  | 3.859605  | 2.177634  | -1.423438 | N | 1.924296  | 4.498263  | 1.929422  |
| H  | 4.931743  | 2.007513  | -1.570399 | H | 1.375067  | 3.656057  | 1.700609  |
| C  | 3.219941  | 3.324777  | -1.023589 | C | 2.645276  | 4.421871  | 3.100031  |
| H  | 3.655371  | 4.298279  | -0.773761 | O | 3.352746  | 5.332898  | 3.537750  |
| C  | 1.801440  | 3.019582  | -0.990786 | C | 2.573314  | 3.099167  | 3.835638  |
| C  | 0.808440  | 3.949190  | -0.623079 | C | 3.596554  | 2.913173  | 4.813651  |
| C  | -0.567929 | 3.655040  | -0.592151 | H | 4.311593  | 3.740613  | 4.928709  |
| C  | -1.574387 | 4.577143  | -0.100873 | C | 3.678512  | 1.767242  | 5.578232  |
| H  | -1.367191 | 5.586771  | 0.269422  | H | 4.483129  | 1.640744  | 6.318817  |
| C  | -2.780280 | 3.928066  | -0.185118 | C | 2.725144  | 0.724946  | 5.401878  |
| H  | -3.772306 | 4.293256  | 0.100385  | C | 2.785246  | -0.510021 | 6.106298  |
| C  | -2.509656 | 2.615039  | -0.740879 | H | 3.579334  | -0.660205 | 6.854665  |
| C  | -3.507954 | 1.654084  | -0.991343 | C | 1.866916  | -1.506313 | 5.821498  |
| C  | -1.632095 | -3.870388 | -2.465955 | H | 1.894432  | -2.481983 | 6.327850  |
| C  | -1.359939 | -4.697555 | -1.328877 | C | 0.877422  | -1.251202 | 4.835405  |
| C  | -1.769996 | -6.048302 | -1.333437 | H | 0.160178  | -2.040889 | 4.564249  |
| H  | -1.554103 | -6.658587 | -0.447988 | N | 0.764976  | -0.103247 | 4.184751  |
| C  | -2.427679 | -6.574090 | -2.453565 | C | 1.667692  | 0.885643  | 4.437085  |
| H  | -2.738532 | -7.629987 | -2.444395 | C | 1.601768  | 2.099581  | 3.661103  |
| C  | -2.690695 | -5.774926 | -3.576987 | O | 0.655070  | 2.236109  | 2.682758  |
| H  | -3.202062 | -6.196497 | -4.454956 | C | -0.731403 | 2.284637  | 3.068519  |
| C  | -2.292275 | -4.428953 | -3.572599 | H | -1.025388 | 1.358855  | 3.599570  |
| H  | -2.481583 | -3.786368 | -4.445749 | H | -1.306832 | 2.381106  | 2.129158  |
| N  | -0.663870 | -4.113791 | -0.264731 | H | -0.920521 | 3.173520  | 3.706833  |
| H  | -0.480458 | -3.103153 | -0.349406 | C | -4.908577 | 2.022424  | -0.614844 |
| C  | -0.031452 | -4.701712 | 0.812568  | C | -5.396506 | 1.723744  | 0.688079  |
| O  | -0.213831 | -5.869817 | 1.172420  | C | -6.665374 | 2.205773  | 1.080329  |
| C  | 1.024286  | -3.837477 | 1.465608  | H | -7.013111 | 2.010232  | 2.101017  |
| C  | 1.994941  | -4.530813 | 2.245059  | C | -7.449546 | 2.935642  | 0.178791  |
| H  | 1.829604  | -5.610627 | 2.375554  | H | -8.437175 | 3.299365  | 0.500806  |
| C  | 3.090593  | -3.892145 | 2.798034  | C | -6.991760 | 3.200450  | -1.121382 |
| H  | 3.825678  | -4.451537 | 3.396636  | H | -7.612187 | 3.770898  | -1.828302 |
| C  | 3.306322  | -2.507597 | 2.544452  | C | -5.721839 | 2.746841  | -1.504862 |
| C  | 4.456187  | -1.793256 | 2.986284  | H | -5.328621 | 2.972842  | -2.507978 |
| H  | 5.205016  | -2.314717 | 3.603213  | N | -4.596798 | 0.935247  | 1.537451  |
| C  | 4.625874  | -0.466623 | 2.621554  | H | -3.970510 | 0.252428  | 1.092735  |
| H  | 5.503478  | 0.110841  | 2.946853  | C | -4.638421 | 0.906380  | 2.916617  |
| C  | 3.634594  | 0.146466  | 1.805662  | O | -5.324028 | 1.681856  | 3.587287  |
| H  | 3.759315  | 1.192768  | 1.472874  | C | -3.778285 | -0.131434 | 3.606834  |
| N  | 2.535379  | -0.472301 | 1.404654  | C | -3.626632 | 0.070776  | 5.011584  |
| C  | 2.343146  | -1.769682 | 1.767499  | H | -4.076177 | 0.988360  | 5.417839  |
| C  | 1.153652  | -2.443181 | 1.305875  | C | -3.007472 | -0.854902 | 5.827078  |
| O  | 0.178297  | -1.779089 | 0.649230  | H | -2.923658 | -0.684980 | 6.911191  |
| C  | -0.255589 | -0.474159 | 1.078388  | C | -2.482843 | -2.053179 | 5.266822  |
| H  | -0.141298 | -0.374509 | 2.175194  | C | -1.858024 | -3.071324 | 6.041871  |
| H  | -1.316970 | -0.411597 | 0.783353  | H | -1.801653 | -2.950485 | 7.135191  |
| H  | 0.353200  | 0.315134  | 0.600138  | C | -1.320859 | -4.183548 | 5.412912  |
| C  | 4.484179  | -0.535194 | -2.430879 | H | -0.834025 | -4.986896 | 5.985297  |
| C  | 4.762641  | -0.661668 | -3.821587 | C | -1.389188 | -4.264530 | 3.993855  |

|   |           |           |          |   |           |           |           |
|---|-----------|-----------|----------|---|-----------|-----------|-----------|
| H | -0.935692 | -5.116815 | 3.455793 | H | 4.231634  | -6.025399 | 0.465842  |
| N | -1.982435 | -3.347427 | 3.241661 | H | 5.840492  | -6.323825 | -0.335291 |
| C | -2.557342 | -2.268056 | 3.843077 | C | -3.526226 | -0.083620 | -3.362031 |
| C | -3.251389 | -1.299940 | 3.023780 | C | -3.073005 | 1.041693  | -4.104461 |
| O | -3.390060 | -1.478676 | 1.684549 | C | -3.932874 | 1.662400  | -5.032770 |
| C | -3.718815 | -2.772733 | 1.138430 | H | -3.564769 | 2.534410  | -5.592046 |
| H | -2.803323 | -3.313149 | 0.843631 | C | -5.227327 | 1.169735  | -5.236043 |
| H | -4.352660 | -2.568332 | 0.256812 | H | -5.889407 | 1.665947  | -5.961402 |
| H | -4.277426 | -3.376541 | 1.878610 | C | -5.669630 | 0.035759  | -4.535348 |

Conformation 17.

Multiplicity: 2

Charge: 0

E(B97-3c) = -6287.319172005627 Hartree

E(M06/def2-TZVP) = -6287.313392255152 Hartree

E(PBE - D3(BJ)/def2-TZVP) = -6285.129449916969 Hartree

E(PBE0 - D3(BJ)/def2-TZVP) = -6285.304824974927 Hartree

E(PBEh-3c) = -6277.919914744156 Hartree

E(PM6) = 237.59374 Kcal/mol

E(PM7) = 132.12321 Kcal/mol

E( $\omega$ B97X-V/def2-TZVP) = -6289.202259619319 Hartree

E(GFN1-xTB) = -298.827719399502 Hartree

E(GFN2-xTB) = -290.672718880042 Hartree

E(GFN-FF) = -36.522153968158 Hartree

Coordinates:

|    |           |            |           |   |           |           |           |
|----|-----------|------------|-----------|---|-----------|-----------|-----------|
| Cu | -0.607665 | -1.667057  | 0.309080  | H | -5.315450 | 8.978797  | -1.718740 |
| N  | 1.199236  | -2.570075  | 0.423020  | C | -3.985350 | 8.331961  | -3.334326 |
| N  | -0.497958 | -1.693652  | -1.712324 | H | -3.964555 | 9.325772  | -3.818859 |
| N  | -2.364020 | -0.675096  | 0.204498  | N | -3.264313 | 7.380850  | -3.907418 |
| N  | -0.755423 | -1.722828  | 2.332749  | C | -3.250762 | 6.138045  | -3.346797 |
| C  | 1.850344  | -2.986794  | 1.565238  | O | -2.428940 | 5.103001  | -3.929060 |
| C  | 3.179280  | -3.466082  | 1.232781  | O | -1.710613 | 5.217631  | -5.066535 |
| H  | 3.910142  | -3.830433  | 1.962145  | C | -1.228547 | 6.454463  | -5.585849 |
| C  | 3.310237  | -3.361333  | -0.129132 | H | -2.028488 | 7.030487  | -6.088216 |
| H  | 4.160440  | -3.637279  | -0.761311 | H | -0.437644 | 6.173355  | -6.308973 |
| C  | 2.063324  | -2.818278  | -0.625969 | H | -0.799413 | 7.088425  | -4.786186 |
| C  | 1.776233  | -2.652936  | -1.991926 | C | -3.676629 | 0.343136  | -3.621802 |
| C  | 0.545345  | -2.170826  | -2.478262 | C | -3.674875 | 1.756277  | 3.726586  |
| C  | 0.201594  | -2.107449  | -3.884764 | C | -4.569059 | 2.399632  | 4.601457  |
| H  | 0.853261  | -2.432607  | -4.703192 | H | -4.558845 | 4.96967   | 4.653777  |
| C  | -1.066939 | -1.584091  | -3.956830 | C | -5.450658 | 1.651472  | 5.390701  |
| H  | -1.679120 | -1.404964  | -4.848446 | H | -6.145565 | 2.164990  | 6.071927  |
| C  | -1.480303 | -1.300164  | -2.595668 | C | -5.442843 | 0.249614  | 5.312742  |
| C  | -2.673870 | -0.629957  | -2.262980 | H | -6.134390 | -0.344379 | 5.928794  |
| C  | -3.055279 | -0.327782  | -0.940967 | C | -4.562672 | -0.395025 | 4.433701  |
| C  | -4.238353 | 0.435687   | -0.590031 | H | -4.570310 | -1.491619 | 4.344372  |
| H  | -4.961206 | 0.842315   | -1.304124 | N | -2.792329 | 2.532308  | 2.925358  |
| C  | -4.253214 | 0.543732   | 0.776579  | H | -1.775902 | 3.278638  | 3.009488  |
| H  | -4.985004 | 1.067752   | 1.399596  | C | -3.258953 | 3.423729  | 1.982264  |
| C  | -3.082547 | -0.159064  | 1.264468  | O | -4.465079 | 3.640067  | 1.811437  |
| C  | -2.787822 | -0.335469  | 2.632641  | C | -2.205086 | 4.062802  | 1.129933  |
| C  | -1.731670 | -1.134144  | 3.109451  | C | -1.258581 | 3.200643  | 0.491284  |
| C  | -1.518697 | -1.461600  | 4.506967  | H | -1.276503 | 2.129746  | 0.745456  |
| H  | -2.142554 | -1.115185  | 5.336769  | C | -0.398011 | 3.654852  | -0.489372 |
| C  | -0.417499 | -2.275592  | 4.559874  | H | 0.282022  | 2.966386  | -1.011444 |
| H  | 0.044994  | -2.735573  | 5.439628  | C | -0.426914 | 5.026571  | -0.874648 |
| C  | 0.083515  | -2.389156  | 3.203884  | C | 0.404234  | 5.558449  | -1.901161 |
| C  | 1.322170  | -2.972415  | 2.872842  | H | 1.060824  | 4.876846  | -2.459364 |
| C  | 2.819394  | -3.065425  | -2.982978 | C | 0.324406  | 6.908327  | -2.202927 |
| C  | 2.843013  | -4.398858  | -3.479223 | H | 0.954110  | 7.354537  | -2.982722 |
| C  | 3.829866  | -4.761826  | -4.421984 | C | -0.593927 | 7.717471  | -1.479997 |
| H  | 3.830755  | -5.772059  | -4.849208 | H | -0.669848 | 8.796503  | -1.710011 |
| C  | 4.795497  | -3.834125  | -4.829651 | N | -1.394147 | 7.259599  | -0.529122 |
| H  | 5.558095  | -4.142576  | -5.560707 | C | -1.333547 | 5.934119  | -0.226754 |
| C  | 4.783334  | -2.521117  | -4.334495 | O | -2.235538 | 5.429649  | 0.789794  |
| H  | 5.537401  | -1.791104  | -4.663004 | C | -3.026134 | 6.377402  | 1.328857  |
| C  | 3.785823  | -2.144678  | -3.424304 | H | -3.615851 | 6.254809  | 2.614170  |
| H  | 3.748164  | -1.117571  | -3.030979 | H | -4.583635 | 5.717074  | 2.569495  |
| N  | 1.836141  | -5.275204  | -3.046733 | H | -3.761569 | 7.288846  | 2.982169  |
| H  | 0.985658  | -4.831304  | -2.682173 | H | -2.946967 | 5.710249  | 3.316735  |
| C  | 1.745346  | -6.656584  | -3.020898 | C | 2.148000  | -3.591793 | 3.953491  |
| O  | 0.669886  | -7.201061  | -2.779195 | C | 2.789898  | -2.801608 | 4.953339  |
| C  | 2.974904  | -7.478798  | -3.297313 | C | 3.604485  | -3.439841 | 5.918592  |
| C  | 2.888634  | -8.461134  | -4.319344 | H | 4.098758  | -2.817457 | 6.672288  |
| H  | 1.945145  | -8.535733  | -4.879942 | C | 3.768017  | -4.830106 | 5.896316  |
| C  | 3.950201  | -9.302602  | -4.603475 | H | 4.404930  | -5.303513 | 6.659111  |
| C  | 3.879577  | -10.052499 | -5.405626 | C | 3.135542  | -5.615004 | 4.920765  |
| C  | 5.151355  | -9.197676  | -3.849690 | H | 3.262810  | -6.707539 | 4.907679  |
| C  | 6.297165  | -10.002299 | -4.110195 | C | 2.335664  | -4.987237 | 3.956851  |
| H  | 6.248610  | -10.754887 | -4.913081 | H | 1.832566  | -5.580581 | 3.178401  |
| C  | 7.449783  | -9.824368  | -3.364185 | N | 2.579715  | -1.414632 | 4.934382  |
| H  | 8.350643  | -10.428710 | -3.546656 | H | 1.929333  | -1.042794 | 4.225190  |
| C  | 7.449574  | -8.831654  | -2.346266 | O | 3.043297  | -0.474403 | 5.826046  |
| H  | 8.361305  | -8.664657  | -1.743731 | C | 3.820237  | -0.724517 | 6.751745  |
| N  | 6.403788  | -8.073178  | -2.058747 | C | 2.520312  | 0.940012  | 5.646230  |
| C  | 5.256933  | -8.232841  | -2.777799 | C | 2.976677  | 1.846827  | 6.649745  |
| C  | 4.121652  | -7.387654  | -2.489165 | H | 3.646870  | 1.421731  | 7.410529  |
| O  | 4.098485  | -6.457260  | -1.509897 | C | 2.620860  | 3.178521  | 6.652033  |
| C  | 4.784309  | -6.643551  | -0.267464 | H | 3.005575  | 3.864357  | 7.422114  |
| H  | 4.760615  | -7.706099  | 0.046513  | C | 1.740685  | 3.679236  | 5.653170  |
|    |           |            |           | C | 1.331076  | 5.040491  | 5.602640  |

|   |           |          |          |   |          |          |           |
|---|-----------|----------|----------|---|----------|----------|-----------|
| H | 1.719744  | 5.744416 | 6.355186 | C | 0.978398 | 0.111872 | 5.551684  |
| C | 0.459019  | 5.453669 | 4.610932 | O | 1.395309 | 1.241267 | 6.148290  |
| H | 0.131067  | 6.499947 | 4.526268 | C | 2.558804 | 1.945706 | 5.745557  |
| C | -0.029068 | 4.485494 | 3.694894 | H | 3.392041 | 1.248613 | 5.505620  |
| H | -0.742142 | 4.784606 | 2.908568 | H | 2.849307 | 2.569676 | 6.611787  |
| N | 0.315916  | 3.203784 | 3.711133 | H | 2.367823 | 2.577269 | 4.855828  |
| C | 1.220941  | 2.786170 | 4.646679 | C | 5.477486 | 1.737847 | -3.233639 |
| C | 1.664886  | 1.412902 | 4.634588 | C | 5.293641 | 3.091428 | -2.826178 |
| O | 1.215452  | 0.558084 | 3.664136 | C | 6.343513 | 4.021098 | -2.993195 |
| C | 1.524354  | 0.867698 | 2.289982 | H | 6.185997 | 5.052273 | -2.655239 |
| H | 1.063926  | 1.828622 | 1.991996 | C | 7.551654 | 3.607546 | -3.569694 |
| H | 1.094370  | 0.038779 | 1.698455 | H | 8.361232 | 4.342668 | -3.695101 |
| H | 2.624784  | 0.899788 | 2.143284 | C | 7.739414 | 2.279308 | -3.982559 |

Conformation 22.

Multiplicity: 2

Charge: 0

E(B97-3c) = -6287.329015287301 Hartree

E(M06/def2-TZVP) = -6287.318642663349 Hartree

E(PBE - D3(BJ)/def2-TZVP) = -6285.142703178262 Hartree

E(PBE0 - D3(BJ)/def2-TZVP) = -6285.317520040165 Hartree

E(PBEh-3c) = -6277.926779512231 Hartree

E(PM6) = 254.54567 Kcal/mol

E(PM7) = 114.14864 Kcal/mol

E( $\omega$ B97X-V/def2-TZVP) = -6289.213333313693 Hartree

E(GFN1-xTB) = -298.84581164812 Hartree

E(GFN2-xTB) = -290.683398326237 Hartree

E(GFN-FF) = -36.536953511415 Hartree

Coordinates:

|    |           |           |           |   |           |           |           |
|----|-----------|-----------|-----------|---|-----------|-----------|-----------|
| Cu | 1.764629  | -1.413395 | -2.297578 | H | -3.498547 | 5.729555  | 0.710117  |
| N  | 1.382508  | -2.792965 | -0.850867 | H | -1.761694 | 5.939269  | 2.530257  |
| N  | 3.524999  | -0.961011 | -1.405539 | N | -0.165540 | 5.440434  | 1.311102  |
| N  | 2.121231  | -0.004759 | -3.715360 | O | 0.268090  | 5.081742  | 0.069365  |
| N  | 0.001077  | -1.862165 | -3.187042 | C | 1.686811  | 4.936158  | -0.173406 |
| C  | 0.295713  | -3.640541 | -0.780992 | O | 2.653677  | 5.113137  | 0.743051  |
| C  | 0.363552  | -4.439548 | 0.426138  | C | 2.490965  | 4.795272  | 2.130631  |
| H  | -0.366512 | -5.204616 | 0.710437  | H | 1.823318  | 5.512812  | 2.640106  |
| C  | 1.483618  | -4.035104 | 1.106733  | H | 3.512920  | 4.843883  | 2.552930  |
| H  | 1.859329  | -4.400961 | 2.067884  | H | 2.100037  | 3.764174  | 2.254106  |
| C  | 2.122802  | -3.016741 | 0.292614  | C | -0.852721 | 0.497387  | -6.043270 |
| C  | 3.327723  | -2.372352 | 0.632402  | C | -2.092141 | 1.118122  | -5.718124 |
| C  | 3.986678  | -1.450298 | -0.201678 | C | -2.901024 | 1.646899  | -6.745792 |
| C  | 5.274151  | -0.862937 | 0.115899  | H | -3.864005 | 2.099700  | -6.483397 |
| H  | 5.870326  | -1.100337 | 1.004406  | C | -2.478727 | 1.575731  | -8.078802 |
| C  | 5.580142  | -0.003280 | -0.909932 | H | -3.121292 | 1.992481  | -8.869048 |
| H  | 6.468319  | 0.625025  | -1.032909 | C | -1.249762 | 0.983059  | -8.409096 |
| C  | 4.477476  | -0.066445 | -1.848375 | H | -0.921211 | 0.924903  | -9.457256 |
| C  | 4.382452  | 0.746436  | -2.995065 | C | -0.447205 | 0.449993  | -7.391902 |
| C  | 3.254841  | 0.774592  | -3.837605 | H | 0.506448  | -0.041572 | -7.636326 |
| C  | 3.096095  | 1.719136  | -4.926356 | N | -2.493256 | 1.178038  | -4.369897 |
| H  | 3.855580  | 2.444390  | -5.238150 | H | -1.752698 | 1.023255  | -3.680940 |
| C  | 1.837855  | 1.525534  | -5.436483 | C | -3.791344 | 0.918877  | -3.919989 |
| H  | 1.348842  | 2.062934  | -6.255114 | O | -4.747524 | 0.797248  | -4.674575 |
| C  | 1.247385  | 0.428239  | -4.691116 | C | -3.908413 | 0.859824  | -2.420881 |
| C  | -0.021181 | -0.120990 | -4.968111 | C | -3.407299 | 1.930689  | -1.636824 |
| C  | -0.557187 | -1.231618 | -4.281653 | H | -2.833575 | 2.722018  | -2.142263 |
| C  | -1.819740 | -1.857733 | -4.626382 | C | -3.652676 | 2.014250  | -0.275333 |
| H  | -2.470362 | -1.555008 | -5.453598 | H | -3.267157 | 2.853611  | 0.319632  |
| C  | -2.026722 | -2.859483 | -3.715920 | C | -4.440363 | 1.013479  | 0.306639  |
| H  | -2.877664 | -3.542849 | -3.640600 | C | -4.827289 | 1.094860  | 1.719933  |
| C  | -0.887892 | -2.853998 | -2.817908 | H | -4.485930 | 1.954500  | 2.317144  |
| C  | -0.770509 | -3.703675 | -1.701722 | C | -5.621468 | 0.107096  | 2.272665  |
| C  | 3.889631  | -2.620362 | 1.993947  | H | -5.936766 | 0.146708  | 3.324668  |
| C  | 3.740156  | -1.620104 | 2.992701  | C | -5.996408 | -0.994166 | 1.455186  |
| C  | 4.158056  | -1.882687 | 4.312072  | H | -6.588319 | -0.822469 | 1.883828  |
| H  | 4.032810  | -1.103953 | 5.077083  | N | -5.654440 | -1.111780 | 0.182726  |
| C  | 4.722825  | -3.119671 | 4.644210  | C | -4.907492 | -0.131236 | -0.399119 |
| H  | 5.040226  | -3.310586 | 5.680162  | C | -4.600668 | -0.211071 | -1.810904 |
| C  | 4.902412  | -4.101126 | 3.656452  | O | -4.927942 | -1.222013 | -2.631175 |
| H  | 5.362577  | -5.067400 | 3.910509  | C | -5.464280 | -2.477974 | -2.214733 |
| C  | 4.489304  | -3.845725 | 2.341170  | H | -4.831470 | -2.956722 | -1.443487 |
| H  | 4.612301  | -4.611239 | 1.560440  | H | -5.474762 | -3.095437 | -3.133868 |
| N  | 3.175396  | -0.370281 | 2.644007  | H | -6.486860 | -2.374978 | -1.808054 |
| H  | 3.516439  | 0.074299  | 1.784220  | C | -1.855657 | -4.707730 | -1.474391 |
| C  | 2.189622  | 0.359929  | 3.287156  | C | -2.805348 | -4.549064 | -0.421559 |
| O  | 1.961419  | 1.523345  | 2.943615  | C | -3.816689 | -5.524335 | -0.252550 |
| C  | 1.363095  | -0.386603 | 4.293025  | H | -4.531052 | -5.391710 | 0.567255  |
| C  | 0.825802  | -1.636464 | 3.841727  | C | -3.884717 | -6.625370 | -1.114660 |
| H  | 1.094824  | -1.982460 | 2.833669  | H | -4.681548 | -7.370097 | -0.965834 |
| C  | -0.043433 | -2.389614 | 4.599233  | C | -2.958795 | -6.784493 | -2.156710 |
| H  | -0.458223 | -3.330330 | 4.208522  | H | -3.014852 | -7.651340 | -2.831428 |
| C  | -0.439343 | -1.920504 | 5.883552  | C | -1.953500 | -5.823074 | -2.326872 |
| C  | -1.331177 | -2.638321 | 6.727784  | H | -1.213354 | -5.928696 | -3.134440 |
| H  | -1.729702 | -3.605542 | 6.384034  | N | -2.698085 | -3.417228 | 0.396212  |
| C  | -1.694799 | -2.101986 | 7.951886  | H | -2.042958 | -2.679262 | 0.103898  |
| H  | -2.384075 | -2.629703 | 8.627878  | C | -3.319272 | -3.183454 | 1.607165  |
| C  | -1.158624 | -0.837561 | 8.321056  | O | -4.146440 | -3.956109 | 2.102651  |
| H  | -1.441545 | -0.387009 | 9.290698  | C | -2.911887 | -1.932702 | 2.351076  |
| N  | -0.319123 | -0.140889 | 7.568568  | C | -3.434861 | -1.867322 | 3.674300  |
| C  | 0.050042  | -0.657706 | 6.365476  | H | -4.054744 | -2.721033 | 3.982753  |



|   |           |           |           |   |           |           |           |
|---|-----------|-----------|-----------|---|-----------|-----------|-----------|
| C | -3.177914 | -0.811785 | 4.522945  | C | 2.062683  | -0.216168 | 7.122055  |
| H | -3.565078 | -0.802300 | 5.552598  | H | 2.473612  | 0.809774  | 7.108960  |
| C | -2.393848 | 0.279238  | 4.064515  | N | 1.741935  | -0.738421 | 5.947774  |
| C | -2.083221 | 1.401122  | 4.883645  | C | 1.244091  | -2.006774 | 5.908326  |
| H | -2.422900 | 1.407152  | 5.930684  | C | 0.889871  | -2.572118 | 4.629882  |
| C | -1.346128 | 2.450412  | 4.362885  | O | 1.012766  | -1.897456 | 3.471909  |
| H | -1.076379 | 3.321392  | 4.977554  | C | 0.439587  | -0.585518 | 3.329839  |
| C | -0.927288 | 2.375580  | 3.007635  | H | -0.558377 | -0.556969 | 3.809539  |
| H | -0.353705 | 3.206376  | 2.564236  | H | 0.320665  | -0.439481 | 2.240691  |
| N | -1.180546 | 1.340063  | 2.222294  | H | 1.105856  | 0.193464  | 3.743875  |
| C | -1.875543 | 0.281594  | 2.717879  | C | -4.232613 | -1.820066 | -2.025113 |
| C | -2.111488 | -0.870075 | 1.872270  | C | -5.187396 | -2.377921 | -1.123424 |
| O | -1.624316 | -0.987654 | 0.611228  | C | -6.476172 | -2.714974 | -1.596029 |
| C | -0.666400 | -0.118040 | -0.015919 | H | -7.186851 | -3.166703 | -0.894863 |
| H | -1.105882 | 0.873036  | -0.221723 | C | -6.815063 | -2.479019 | -2.934363 |
| H | -0.404239 | -0.637334 | -0.956798 | H | -7.823893 | -2.746169 | -3.284666 |
| H | 0.233525  | 0.013041  | 0.613544  | C | -5.889358 | -1.911503 | -3.823595 |

Conformation 26.

Multiplicity: 2

Charge: 0

E(B97-3c) = -6287.318670069100 Hartree

E(M06/def2-TZVP) = -6287.311337184255 Hartree

E(PBE - D3(BJ)/def2-TZVP) = -6285.132064212398 Hartree

E(PBE0 - D3(BJ)/def2-TZVP) = -6285.306367682145 Hartree

E(PBEh-3c) = -6277.913089849062 Hartree

E(PM6) = 266.17446 Kcal/mol

E(PM7) = 138.11293 Kcal/mol

E( $\omega$ B97X-V/def2-TZVP) = -6289.203175746834 Hartree

E(GFN1-xTB) = -298.825300793360 Hartree

E(GFN2-xTB) = -290.669636716637 Hartree

E(GFN-FF) = -36.519877367473 Hartree

Coordinates:

|    |           |           |           |   |           |           |           |
|----|-----------|-----------|-----------|---|-----------|-----------|-----------|
| Cu | 0.270814  | -0.816000 | -0.240811 | C | -1.995829 | -1.542047 | 6.047541  |
| N  | 1.778401  | -1.921312 | 0.543756  | H | -1.262496 | -0.773168 | 6.350086  |
| N  | -0.748985 | -2.509735 | -0.670652 | N | -2.381814 | -1.523388 | 4.780118  |
| N  | -1.219292 | 0.296347  | -1.046881 | C | -3.293748 | -2.441150 | 4.353349  |
| N  | 1.292135  | 0.890775  | 0.201939  | C | -3.720884 | -2.423576 | 2.974227  |
| C  | 2.917334  | -1.446658 | 1.159822  | O | -3.105887 | -1.620308 | 2.070439  |
| C  | 3.773790  | -2.551358 | 1.543316  | C | -3.190715 | -0.175033 | 2.219485  |
| H  | 4.750472  | -2.443180 | 2.025624  | H | -4.222912 | 0.172392  | 1.996964  |
| C  | 3.123723  | -3.699622 | 1.172729  | H | -2.490918 | 0.244406  | 1.472804  |
| H  | 3.464910  | -4.735001 | 1.276558  | H | -2.887862 | 0.129187  | 3.238344  |
| C  | 1.862863  | -3.297700 | 0.581245  | C | -0.439105 | 4.022295  | -1.104667 |
| C  | 0.868426  | -4.198484 | 0.159927  | C | -0.392302 | 4.524246  | -2.437120 |
| C  | -0.349733 | -3.804678 | -0.425008 | C | -0.545716 | 5.910713  | -2.655920 |
| C  | -1.391443 | -4.731507 | -0.822987 | H | -0.444764 | 6.315234  | -3.669776 |
| H  | -1.341859 | -5.818790 | -0.714089 | C | -0.799913 | 6.775777  | -1.587279 |
| C  | -2.421534 | -3.979611 | -1.320457 | H | -0.922102 | 7.852850  | -1.786814 |
| H  | -3.379618 | -4.323378 | -1.723664 | C | -0.878978 | 6.287147  | -0.275337 |
| C  | -2.018993 | -2.591373 | -1.202897 | H | -1.080315 | 6.966247  | 0.566109  |
| C  | -2.849300 | -1.508685 | -1.554295 | C | -0.683566 | 4.919142  | -0.046392 |
| C  | -2.453941 | -0.160296 | -1.466637 | H | -0.728031 | 4.514727  | 0.975961  |
| C  | -3.298028 | 0.959267  | -1.832199 | N | -0.143546 | 3.616338  | -3.483558 |
| H  | -4.336845 | 0.869789  | -2.167038 | H | 0.321112  | 2.739199  | -3.215784 |
| C  | -2.544565 | 2.095171  | -1.670197 | C | -0.485794 | 3.635963  | -4.819075 |
| H  | -2.822790 | 3.137007  | -1.856740 | O | -0.131088 | 2.727536  | -5.573407 |
| C  | -1.253207 | 1.670566  | -1.173834 | C | -1.259390 | 4.801942  | -5.377959 |
| C  | -0.226402 | 2.569359  | -0.819471 | C | -0.614292 | 5.605663  | -6.355001 |
| C  | 0.946958  | 2.182988  | -0.142638 | H | 0.429435  | 5.370320  | -6.611758 |
| C  | 1.935521  | 3.113688  | 0.368790  | C | -1.271660 | 6.656953  | -6.971308 |
| H  | 1.912795  | 4.197817  | 0.219999  | H | -0.762235 | 7.282390  | -7.719735 |
| C  | 2.852434  | 2.372763  | 1.068496  | C | -2.624176 | 6.935999  | -6.632780 |
| H  | 3.736678  | 2.722249  | 1.611788  | C | -3.352367 | 8.020552  | -7.199831 |
| C  | 2.462465  | 0.984163  | 0.929124  | H | -2.859500 | 8.659010  | -7.950013 |
| C  | 3.230150  | -0.095768 | 1.405338  | C | -4.655388 | 8.261398  | -6.798693 |
| C  | 1.098957  | -5.658082 | 0.368618  | H | -5.240154 | 9.093965  | -7.216891 |
| C  | 1.203770  | -6.239854 | 1.661490  | C | -5.231148 | 7.403937  | -5.821381 |
| C  | 1.483078  | -7.616991 | 1.787691  | H | -6.266898 | 7.582286  | -5.478490 |
| H  | 1.554251  | -8.049900 | 2.797514  | N | -4.597911 | 6.376124  | -5.279073 |
| C  | 1.650744  | -8.427328 | 0.659844  | C | -3.315685 | 6.117013  | -5.662069 |
| H  | 1.869425  | -9.498522 | 0.783411  | C | -2.608882 | 5.013430  | -5.056838 |
| C  | 1.524575  | -7.868435 | -0.621113 | O | -3.143824 | 4.181575  | -4.135028 |
| H  | 1.649798  | -8.493429 | -1.517618 | C | -4.520268 | 3.790266  | -4.176554 |
| C  | 1.250891  | -6.501526 | -0.753229 | H | -5.167314 | 4.527506  | -3.667131 |
| H  | 1.173094  | -6.048874 | -1.752932 | H | -4.560652 | 2.808749  | -3.666718 |
| N  | 1.108962  | -5.481066 | -2.853061 | H | -4.871454 | 3.677407  | -5.221538 |
| H  | 1.809988  | -5.687201 | 3.567786  | C | 4.456162  | 0.188899  | 2.213790  |
| O  | 0.173156  | -4.520125 | 3.207534  | C | 5.643260  | 0.692050  | 1.604242  |
| C  | -0.795147 | -4.207276 | 2.530094  | C | 6.791838  | 0.909740  | 2.400176  |
| C  | 0.494116  | -3.915982 | 4.559452  | H | 7.697143  | 1.288007  | 1.911911  |
| C  | 0.384305  | -4.698763 | 5.739730  | C | 6.751674  | 0.642559  | 3.774810  |
| H  | 0.049321  | -5.744161 | 5.650386  | H | 7.655365  | 0.820229  | 4.378147  |
| C  | 0.651405  | -4.160728 | 6.989826  | C | 5.583983  | 0.154767  | 4.381734  |
| H  | 0.537332  | -4.766572 | 7.901496  | H | 5.554647  | -0.051302 | 5.462343  |
| C  | 1.095063  | -2.814060 | 7.097100  | C | 4.444783  | -0.073404 | 3.596286  |
| C  | 1.431381  | -2.202409 | 8.338516  | H | 3.519754  | -0.453332 | 4.057888  |
| H  | 1.317036  | -2.781013 | 9.269090  | N | 5.599011  | 0.958819  | 0.230583  |
| C  | 1.908868  | -0.902182 | 8.358864  | H | 4.701814  | 0.786356  | -0.251250 |
| H  | 2.180391  | -0.405844 | 9.302185  | C | 6.553881  | 1.552305  | -0.563563 |

|   |          |           |           |   |           |           |           |
|---|----------|-----------|-----------|---|-----------|-----------|-----------|
| O | 7.695242 | 1.830245  | -0.183839 | C | -5.699342 | -7.408663 | -6.070657 |
| C | 6.105931 | 1.912407  | -1.968558 | H | -6.440825 | -8.222204 | -6.029682 |
| C | 7.080121 | 2.629770  | -2.725483 | C | -5.316368 | -6.848689 | -7.277420 |
| H | 8.044451 | 2.800290  | -2.252265 | H | -5.736189 | -7.198838 | -8.231982 |
| C | 6.832345 | 3.077117  | -4.006969 | C | -4.360418 | -5.796667 | -7.259867 |
| H | 7.604471 | 3.619085  | -4.574450 | H | -4.045632 | -5.326325 | -8.209570 |
| C | 5.556556 | 2.861069  | -4.600223 | N | -3.802113 | -5.328691 | -6.155022 |
| C | 5.208585 | 3.337683  | -5.895376 | C | -4.159009 | -5.867547 | -4.954913 |
| H | 5.966611 | 3.872358  | -6.489658 | C | -3.572346 | -5.344204 | -3.742400 |
| C | 3.927200 | 3.132176  | -6.378136 | O | -2.647734 | -4.357734 | -3.710357 |
| H | 3.625375 | 3.487731  | -7.374646 | C | -1.679936 | -4.178616 | -4.749054 |
| C | 2.984687 | 2.455430  | -5.554606 | H | -1.306801 | -5.153754 | -5.120527 |
| H | 1.942183 | 2.315761  | -5.891533 | H | -0.846678 | -3.620884 | -4.279618 |
| N | 3.274207 | 1.985881  | -4.347719 | H | -2.097824 | -3.615242 | -5.602729 |
| C | 4.538613 | 2.155008  | -3.863576 | C | -3.016969 | 1.295492  | 5.394284  |
| C | 4.852948 | 1.642414  | -2.551794 | C | -3.605941 | 2.497219  | 4.892968  |
| O | 3.911074 | 0.956397  | -1.838352 | C | -4.462635 | 3.258557  | 5.716608  |
| C | 3.295433 | -0.212753 | -2.415756 | H | -4.902671 | 4.175406  | 5.306234  |
| H | 2.705972 | 0.067088  | -3.307662 | C | -4.729860 | 2.830417  | 7.023780  |
| H | 2.637956 | -0.617943 | -1.625566 | H | -5.400209 | 3.431660  | 7.656856  |
| H | 4.072517 | -0.963096 | -2.676102 | C | -4.153082 | 1.655197  | 7.529738  |

Conformation 3.

Multiplicity: 2

Charge: 0

E(B97-3c) = -6287.335305010298 Hartree

E(M06/def2-TZVP) = -6287.332416021612 Hartree

E(PBE - D3(BJ)/def2-TZVP) = -6285.148760403490 Hartree

E(PBE0 - D3(BJ)/def2-TZVP) = -6285.324726779480 Hartree

E(PBEh-3c) = -6277.930383103001 Hartree

E(PM6) = 239.99018 Kcal/mol

E(PM7) = 115.73053 Kcal/mol

E( $\omega$ B97X-V/def2-TZVP) = -6289.223305646209 Hartree

E(GFN1-xTB) = -298.850032310286 Hartree

E(GFN2-xTB) = -290.687291468786 Hartree

E(GFN-FF) = -36.548023991548 Hartree

Coordinates:

|    |           |           |           |   |           |           |           |
|----|-----------|-----------|-----------|---|-----------|-----------|-----------|
| Cu | 0.069978  | -0.934022 | 2.242479  | C | -1.430282 | 1.302015  | -2.319083 |
| N  | -0.110109 | -1.710096 | 0.383162  | H | -0.679531 | 0.548470  | -2.617964 |
| N  | -1.931641 | -0.699416 | 2.351605  | N | -1.463478 | 1.622249  | -1.035547 |
| N  | 0.283768  | -0.039429 | 4.047402  | C | -2.393762 | 2.521657  | -0.611075 |
| N  | 2.065958  | -1.325237 | 2.204614  | C | -2.458847 | 2.840844  | 0.790269  |
| C  | 0.908565  | -2.160676 | -0.432491 | O | -1.510213 | 2.287436  | 1.613615  |
| C  | 0.384153  | -2.490014 | -1.744386 | C | -0.502411 | 3.195756  | 2.102184  |
| H  | 0.983296  | -2.882464 | 3.573651  | H | 0.063887  | 3.623930  | 1.251229  |
| C  | -0.964502 | -2.239516 | -1.706015 | H | 0.181186  | 2.600000  | 2.734609  |
| H  | -1.712838 | -2.390049 | -2.490304 | H | -0.955575 | 4.005201  | 2.713347  |
| C  | -1.265152 | -1.775098 | -0.366355 | C | 3.904299  | 0.077713  | 5.210880  |
| C  | -2.570415 | -1.500498 | 0.090439  | C | 4.999141  | 0.855305  | 4.748206  |
| C  | -2.859456 | -1.043741 | 1.392031  | C | 6.137209  | 1.016135  | 5.562417  |
| C  | -4.201136 | -0.795112 | 1.888048  | H | 6.970275  | 1.628320  | 5.185610  |
| H  | -5.122713 | -1.010329 | 1.337577  | C | 6.197829  | 0.433873  | 6.834757  |
| C  | -4.064600 | -0.248319 | 3.138865  | H | 7.095535  | 0.569273  | 7.456531  |
| H  | -4.849183 | 0.081673  | 3.828515  | C | 5.103124  | -0.299598 | 7.317371  |
| C  | -2.641358 | -0.163644 | 3.404910  | H | 5.134184  | -0.750788 | 8.320316  |
| C  | -2.091554 | 0.511235  | 4.516269  | C | 3.972040  | -0.471575 | 6.508215  |
| C  | -0.709299 | 0.591813  | 4.770339  | H | 3.122424  | -1.073021 | 6.864839  |
| C  | -0.124811 | 1.346192  | 5.863988  | N | 4.987348  | 1.472745  | 3.473869  |
| H  | -0.691008 | 1.961102  | 6.571142  | H | 5.737206  | 1.264860  | 2.804077  |
| C  | 1.228374  | 1.135996  | 5.810491  | C | 4.042262  | 2.381741  | 3.055820  |
| H  | 2.010691  | 1.558755  | 6.447806  | O | 3.092378  | 2.732295  | 3.762020  |
| C  | 1.471746  | 0.254415  | 4.685544  | C | 4.243758  | 2.980775  | 1.684781  |
| C  | 2.740787  | -0.239425 | 4.332633  | C | 3.527824  | 4.192327  | 1.458989  |
| C  | 2.981037  | -1.039860 | 3.197574  | H | 2.967811  | 4.591339  | 2.317095  |
| C  | 4.266369  | -1.619926 | 2.864085  | C | 3.503491  | 4.811230  | 0.226294  |
| H  | 5.157161  | -1.576249 | 3.499656  | H | 2.942037  | 5.744276  | 0.071072  |
| C  | 4.129271  | -2.212648 | 1.634015  | C | 4.187572  | 4.219707  | -0.871598 |
| H  | 4.883190  | -2.746560 | 1.046741  | C | 4.163104  | 4.771492  | -2.183393 |
| C  | 2.757209  | -2.001858 | 1.218071  | H | 3.585308  | 5.691912  | -2.361715 |
| C  | 2.252984  | -2.347011 | -0.052424 | C | 4.840687  | 4.138447  | -3.211463 |
| C  | -3.708191 | -1.650170 | -0.868852 | H | 4.823487  | 4.531358  | -4.238071 |
| C  | -4.136043 | -2.932212 | -1.322139 | C | 5.548269  | 2.942027  | -2.917685 |
| C  | -5.237801 | -3.015995 | -2.201566 | H | 6.072454  | 2.398667  | -3.724097 |
| H  | -5.609114 | -3.998535 | -2.516135 | N | 5.602817  | 2.401303  | -1.710394 |
| C  | -5.878754 | -1.856749 | -2.653234 | C | 4.937597  | 3.001745  | -0.685021 |
| H  | -6.731415 | -1.952006 | -3.342628 | C | 4.974361  | 2.398148  | 0.628582  |
| C  | -5.458550 | -0.591047 | -2.217188 | O | 5.724513  | 1.303084  | 0.913908  |
| H  | -5.964844 | 0.321918  | -2.563552 | C | 5.974825  | 0.236228  | -0.017681 |
| C  | -4.388696 | -0.502126 | -1.318115 | H | 5.062150  | -0.002253 | -0.594838 |
| H  | -4.055883 | 0.477328  | -0.947733 | H | 6.251744  | -0.629726 | 0.611286  |
| N  | -3.470244 | -4.056807 | -0.814021 | H | 6.783798  | 0.499301  | -0.720666 |
| H  | -2.903727 | -3.885409 | 0.024971  | C | 3.200528  | -2.950680 | -1.043218 |
| C  | -3.412092 | -5.386400 | -1.193143 | C | 3.695236  | -2.199382 | -2.151408 |
| O  | -2.884500 | -6.212533 | -0.449802 | C | 4.603191  | -2.803741 | -3.051384 |
| C  | -4.015086 | -5.830530 | -2.499506 | H | 4.969800  | -2.207516 | -3.894532 |
| C  | -4.955021 | -6.894251 | -2.436633 | C | 5.008208  | -4.129943 | -2.856472 |
| H  | -5.219765 | -7.283056 | -1.442481 | H | 5.715432  | -4.582340 | -3.568440 |
| C  | -5.517243 | -7.432677 | -3.580335 | C | 4.524199  | -4.878333 | -1.773184 |
| H  | -6.254115 | -8.247557 | -3.519627 | H | 4.839140  | -5.921916 | -1.625643 |
| C  | -5.138333 | -6.926966 | -4.853622 | C | 3.625107  | -4.281753 | -0.877878 |

|   |           |           |           |
|---|-----------|-----------|-----------|
| H | 3.227727  | -4.851793 | -0.024635 |
| N | 3.244370  | -0.880488 | -2.300375 |
| H | 2.659525  | -0.501932 | -1.543004 |
| C | 3.429102  | -0.017652 | -3.361245 |
| O | 4.146564  | -0.269242 | -4.334415 |
| C | 2.626331  | 1.265362  | -3.324978 |
| C | 2.498981  | 1.899292  | -4.591156 |
| H | 3.000068  | 1.399117  | -5.432354 |
| C | 1.786546  | 3.069622  | -4.759998 |
| H | 1.681169  | 3.532430  | -5.752938 |
| C | 1.190107  | 3.694364  | -3.632703 |
| C | 0.459417  | 4.911539  | -3.736427 |
| H | 0.333389  | 5.371069  | -4.729514 |
| C | -0.075193 | 5.497241  | -2.602113 |
| H | -0.648299 | 6.434680  | -2.651211 |
| C | 0.136654  | 4.852783  | -1.354277 |
| H | -0.274738 | 5.299883  | -0.430316 |
| N | 0.803259  | 3.718285  | -1.215597 |
| C | 1.326450  | 3.111387  | -2.316388 |
| C | 2.037542  | 1.855222  | -2.181562 |
| O | 2.222865  | 1.198211  | -1.017973 |
| C | 1.539189  | 1.451606  | 0.227133  |
| H | 1.842385  | 2.423842  | 0.642076  |
| H | 1.874235  | 0.635794  | 0.891373  |
| H | 0.442456  | 1.411627  | 0.076391  |

Conformation 30.

Multiplicity: 2

Charge: 0

E(B97-3c) = -6287.335181890482 Hartree  
 E(M06/def2-TZVP) = -6287.329801195106 Hartree  
 E(PBE - D3(BJ)/def2-TZVP) = -6285.146661111422 Hartree  
 E(PBE0 - D3(BJ)/def2-TZVP) = -6285.325660216599 Hartree  
 E(PBEh-3c) = -6277.931148379664 Hartree  
 E(PM6) = 274.06109 Kcal/mol  
 E(PM7) = 124.90508 Kcal/mol  
 E( $\omega$ B97X-V/def2-TZVP) = -6289.224330992368 Hartree  
 E(GFN1-xTB) = -298.835888980236 Hartree  
 E(GFN2-xTB) = -290.671057223873 Hartree  
 E(GFN-FF) = -36.542369676091 Hartree

Coordinates:

|    |           |           |           |
|----|-----------|-----------|-----------|
| Cu | -0.528735 | 0.006191  | -0.045052 |
| N  | 1.295766  | 0.865926  | -0.179446 |
| N  | 0.017308  | -1.428416 | -1.366172 |
| N  | -2.354582 | -0.839779 | 0.091952  |
| N  | -1.047221 | 1.388506  | 1.352926  |
| C  | 1.780578  | 1.933413  | 0.555729  |
| C  | 3.096934  | 2.301938  | 0.077868  |
| H  | 3.697460  | 3.125442  | 0.477211  |
| C  | 3.413376  | 1.430641  | -0.936371 |
| H  | 4.329820  | 1.389651  | -1.534851 |
| C  | 2.296882  | 0.520206  | -1.071150 |
| C  | 2.308114  | -0.623405 | -1.898779 |
| C  | 1.236219  | -1.528507 | -2.008587 |
| C  | 1.270156  | -2.723179 | -2.828062 |
| H  | 2.122323  | -3.042577 | -3.436290 |
| C  | 0.049272  | -3.329501 | -2.691965 |
| H  | -0.299773 | -4.250067 | -3.170117 |
| C  | -0.721283 | -2.525069 | -1.761702 |
| C  | -2.030180 | -2.850316 | -1.334554 |
| C  | -2.784617 | -2.026943 | -0.476818 |
| C  | -4.161105 | -2.280865 | -0.099496 |
| H  | -4.734829 | -3.166800 | -0.387317 |
| H  | -4.575197 | -1.204815 | 0.643502  |
| C  | -5.556889 | -1.024523 | 1.093951  |
| C  | -3.434489 | -0.321662 | 0.770271  |
| C  | -3.472738 | 0.899098  | 1.482810  |
| C  | -2.320739 | 1.633736  | 1.823244  |
| C  | -2.301610 | 2.730492  | 2.770569  |
| H  | -3.182045 | 3.131010  | 3.283793  |
| C  | -0.989426 | 3.103991  | 2.912860  |
| H  | -0.571978 | 3.877380  | 3.566173  |
| C  | -0.222426 | 2.310478  | 1.969320  |
| C  | 1.118736  | 2.577885  | 1.624132  |
| C  | 3.585830  | -0.942926 | -2.609238 |
| C  | 4.702594  | -1.407569 | -1.856202 |
| C  | 5.939619  | -1.627905 | -2.495362 |
| H  | 6.793878  | -1.954928 | -1.891232 |
| C  | 6.056812  | -1.416169 | -3.875538 |
| H  | 7.026700  | -1.592381 | -4.364853 |
| C  | 4.953352  | -0.995678 | -4.634422 |
| H  | 5.049284  | -0.839753 | -5.719078 |
| C  | 3.726422  | -0.761573 | -3.996316 |
| H  | 2.857469  | -0.406525 | -4.571059 |
| N  | 4.520702  | -1.623770 | -0.478189 |
| H  | 3.545826  | -1.729553 | -0.190748 |
| C  | 5.437746  | -1.373751 | 0.533655  |
| O  | 6.635511  | -1.198112 | 0.323958  |
| C  | 4.816438  | -1.243397 | 1.903190  |
| C  | 3.504095  | -0.706621 | 2.061391  |

|   |           |           |           |
|---|-----------|-----------|-----------|
| H | 2.900826  | -0.470820 | 1.174417  |
| C | 2.972244  | -0.421266 | 3.305842  |
| H | 1.958796  | -0.001063 | 3.392452  |
| C | 3.742418  | -0.658668 | 4.476790  |
| C | 3.267359  | -0.385893 | 5.790341  |
| H | 2.270308  | 0.064123  | 5.917756  |
| C | 4.060681  | -0.703045 | 6.880671  |
| H | 3.723565  | -0.511584 | 7.910046  |
| C | 5.331965  | -1.299094 | 6.646603  |
| H | 5.971854  | -1.571854 | 7.505375  |
| N | 5.816886  | -1.559522 | 5.441587  |
| C | 5.057289  | -1.237644 | 4.355612  |
| C | 5.577673  | -1.543453 | 3.044837  |
| O | 6.743417  | -2.215369 | 2.918858  |
| H | 7.957624  | -1.520810 | 3.217395  |
| C | 8.126679  | -0.730243 | 2.456871  |
| H | 8.766757  | -2.271381 | 3.146690  |
| H | 7.935978  | -1.100677 | 4.243244  |
| C | -2.627771 | -4.127771 | -1.841618 |
| C | -2.005476 | -5.365688 | -1.534514 |
| C | -2.482351 | -6.555468 | -2.118107 |
| H | -1.967908 | -7.497677 | -1.893122 |
| C | -3.594408 | -6.520438 | -2.969272 |
| H | -3.959786 | -7.456029 | -3.419622 |
| C | -4.244754 | -5.305790 | -3.238022 |
| H | -5.118793 | -5.276903 | -3.905676 |
| C | -3.762268 | -4.114279 | -2.678495 |
| H | -4.238704 | -3.155424 | -2.927989 |
| N | -0.913944 | -5.367969 | -0.645455 |
| H | -0.892554 | -4.668022 | 0.102065  |
| C | 0.288244  | -6.000618 | -0.877230 |
| O | 0.460705  | -6.791432 | -1.807923 |
| C | 1.418727  | -5.651597 | 0.067176  |
| C | 2.654549  | -6.291753 | -0.241269 |
| H | 2.645416  | -6.939359 | -1.129969 |
| C | 3.792098  | -6.105903 | 0.517499  |
| H | 4.739238  | -4.597309 | 0.248058  |
| C | 3.731391  | -5.310689 | 1.695333  |
| C | 4.829562  | -5.163856 | 2.589528  |
| H | 5.800639  | -5.609627 | 2.324517  |
| C | 4.658804  | -4.479033 | 3.779171  |
| H | 5.490043  | -4.329092 | 4.482438  |
| C | 3.381370  | -3.922532 | 4.059695  |
| H | 3.218277  | -3.389102 | 5.012986  |
| N | 2.349855  | -3.984674 | 3.232587  |
| C | 2.495818  | -4.658631 | 2.055761  |
| C | 1.357345  | -4.780016 | 1.174281  |
| O | 0.183226  | -4.136286 | 1.434827  |
| C | 0.149498  | -2.798648 | 1.958163  |
| H | 0.261552  | -2.799830 | 3.055979  |
| H | -0.828521 | -2.382179 | 1.649783  |
| H | 0.963247  | -2.187361 | 1.517703  |
| C | -4.830389 | 1.499248  | 1.668259  |
| C | -5.488877 | 1.918568  | 0.469056  |
| C | -6.808825 | 2.402797  | 0.513297  |
| H | -7.302324 | 2.680517  | -0.426620 |
| C | -7.460650 | 2.507424  | 1.750733  |
| H | -8.492826 | 2.887818  | 1.784263  |
| C | -6.811377 | 2.139412  | 2.940069  |
| H | -7.330522 | 2.229130  | 3.905684  |
| C | -5.501798 | 1.632707  | 2.893540  |
| H | -4.998617 | 1.303415  | 3.815201  |
| N | -4.753375 | 1.801171  | -0.718251 |
| H | -3.753257 | 1.658775  | -0.561190 |
| H | -5.169159 | 1.428990  | -1.985385 |
| O | -6.331405 | 1.473700  | -2.379281 |
| C | -3.996080 | 0.941538  | -2.806245 |
| C | -2.767206 | 1.669637  | -2.811160 |
| H | -2.726187 | 2.634186  | -2.274695 |
| C | -1.664292 | 1.202616  | -3.504800 |
| H | -0.719425 | 1.767167  | -3.505380 |
| C | -1.737762 | -0.014162 | -4.238542 |
| C | -0.643847 | -0.552772 | -4.971025 |
| H | 0.316989  | -0.014382 | -4.974751 |
| C | -0.802982 | -1.747004 | -5.653316 |
| H | 0.026247  | -2.198658 | -6.217062 |
| C | -2.065912 | -2.399246 | -5.600958 |
| H | -2.209580 | -3.356495 | -6.134325 |
| N | -3.110179 | -1.934783 | -4.931701 |
| C | -2.968700 | -0.763453 | -4.249913 |
| C | -4.091916 | -0.273183 | -3.492342 |
| O | -5.199648 | -1.051441 | -3.352505 |
| C | -6.119137 | -1.052394 | -4.448664 |
| H | -6.568373 | -0.042993 | -4.559489 |
| H | -6.912675 | -1.777647 | -4.188379 |
| H | -5.617884 | -1.374990 | -5.384895 |
| C | 1.881553  | 3.617998  | 2.385576  |
| C | 1.561816  | 5.006445  | 2.299157  |
| C | 2.326430  | 5.945234  | 3.029403  |
| H | 2.060397  | 7.005242  | 2.948277  |
| C | 3.394533  | 5.514545  | 3.825746  |

|   |           |          |           |   |           |           |           |
|---|-----------|----------|-----------|---|-----------|-----------|-----------|
| H | 3.978201  | 6.261181 | 4.385567  | C | -5.437868 | -4.519883 | 2.629429  |
| C | 3.726973  | 4.153992 | 3.906511  | O | -6.324894 | -5.374165 | 2.606005  |
| H | 4.569985  | 3.815681 | 4.526869  | C | -5.514583 | -3.271404 | 3.468527  |
| C | 2.971245  | 3.220954 | 3.184179  | C | -5.296998 | -2.029695 | 2.787832  |
| H | 3.222353  | 2.151281 | 3.227666  | H | -4.981147 | -2.059811 | 1.734380  |
| N | 0.491464  | 5.377876 | 1.476464  | C | -5.529624 | -0.804770 | 3.379221  |
| H | 0.005563  | 4.617786 | 0.974813  | H | -5.379118 | 0.125486  | 2.810948  |
| C | -0.107769 | 6.609667 | 1.340888  | C | -6.000383 | -0.752704 | 4.721702  |
| O | 0.287400  | 7.643288 | 1.884991  | C | -6.281164 | 0.466522  | 5.400205  |
| C | -1.352308 | 6.629438 | 0.474771  | H | -6.140839 | 1.420270  | 4.867030  |
| C | -2.090315 | 7.850600 | 0.520964  | C | -6.724217 | 0.433199  | 6.712004  |
| H | -1.673889 | 8.642762 | 1.159926  | H | -6.951011 | 1.357263  | 7.264636  |
| C | -3.257398 | 8.027233 | -0.194335 | C | -6.877577 | -0.832595 | 7.341765  |
| H | -3.815118 | 8.974414 | -0.135300 | H | -7.223361 | -0.880895 | 8.391260  |
| C | -3.756485 | 6.977549 | -1.017098 | N | -6.626464 | -1.989591 | 6.748441  |
| C | -4.963245 | 7.073514 | -1.765265 | C | -6.203628 | -1.974113 | 5.456220  |
| H | -5.550609 | 8.003930 | -1.718545 | C | -5.938508 | -3.251562 | 4.813446  |
| C | -5.380065 | 5.997430 | -2.531526 | O | -6.104812 | -4.305501 | 5.625260  |
| H | -6.310476 | 6.033919 | -3.116566 | C | -5.509790 | -5.570157 | 5.371663  |
| C | -4.575854 | 4.825639 | -2.553025 | H | -6.114966 | -6.169559 | 4.663797  |
| H | -4.893094 | 3.957291 | -3.157912 | H | -5.445844 | -6.076225 | 6.353590  |
| N | -3.446215 | 4.696894 | -1.872199 | H | -4.485989 | -5.453568 | 4.952615  |
| C | -3.026083 | 5.739599 | -1.102662 | C | -3.980001 | 1.814134  | -0.219789 |
| C | -1.818684 | 5.585349 | -0.336786 | C | -4.211276 | 2.036612  | -1.611040 |
| O | -1.175294 | 4.371049 | -0.367808 | C | -5.300034 | 2.849539  | -2.006012 |
| C | -0.396986 | 4.080821 | -1.539655 | H | -5.469416 | 3.002235  | -3.077810 |
| H | -1.022189 | 4.157524 | -2.451114 | C | -6.129449 | 3.435058  | -1.041548 |
| H | -0.033577 | 3.044427 | -1.412592 | H | -6.970809 | 4.062698  | -1.372863 |
| H | 0.469345  | 4.773290 | -1.613196 | C | -5.899930 | 3.232725  | 0.327740  |

Conformation 6.

Multiplicity: 2

Charge: 0

E(B97-3c) = -6287.321627227346 Hartree

E(M06/def2-TZVP) = -6287.318295915039 Hartree

E(PBE - D3(BJ)/def2-TZVP) = -6285.136873575140 Hartree

E(PBE0 - D3(BJ)/def2-TZVP) = -6285.312063486670 Hartree

E(PBEh-3c) = -6277.916003702228 Hartree

E(PM6) = 257.39815 Kcal/mol

E(PM7) = 133.22851 Kcal/mol

E( $\omega$ B97X-V/def2-TZVP) = -6289.206697843812 Hartree

E(GFN1-xTB) = -298.825323984688 Hartree

E(GFN2-xTB) = -290.664448258978 Hartree

E(GFN-FF) = -36.528459760401 Hartree

Coordinates:

|    |           |           |           |   |           |           |           |
|----|-----------|-----------|-----------|---|-----------|-----------|-----------|
| Cu | -0.237623 | -1.069419 | 1.286095  | C | 1.868863  | -1.638945 | -4.998351 |
| N  | 0.064409  | -3.073261 | 1.425940  | H | 2.731595  | -2.082335 | -4.466882 |
| N  | -2.035995 | -1.394530 | 0.420936  | N | 0.939064  | -1.074722 | -4.243168 |
| N  | -0.573721 | 0.928870  | 1.230431  | C | -0.139446 | -0.501351 | -4.848828 |
| N  | 1.617973  | -0.739924 | 2.036499  | C | -1.144134 | 0.131010  | -4.027601 |
| C  | 1.169510  | -3.711399 | 1.952379  | O | -1.001009 | 0.128051  | -2.669250 |
| C  | 0.990788  | -5.149617 | 1.889553  | C | 0.113547  | 0.874799  | -2.125672 |
| H  | 1.722619  | -5.884974 | 2.238954  | H | 1.073870  | 0.497050  | -2.517945 |
| C  | -0.234812 | -5.372165 | 1.315792  | H | 0.073049  | 0.713206  | -1.034907 |
| H  | -0.721938 | -6.328143 | 1.097575  | H | 0.002900  | 1.952396  | -2.357898 |
| C  | -0.794982 | -4.070534 | 1.009094  | C | 2.526223  | 2.529985  | 2.095351  |
| C  | -2.021169 | -3.881594 | 0.344517  | C | 2.975127  | 3.690133  | 0.965608  |
| C  | -2.561859 | -2.613965 | 0.046467  | C | 3.818367  | 4.804611  | 1.148582  |
| C  | -3.830688 | -2.423824 | -0.629598 | H | 4.231564  | 5.311871  | 0.267108  |
| H  | -4.447919 | -3.230577 | -1.039096 | C | 4.167800  | 5.223498  | 2.438629  |
| C  | -4.083789 | -1.075821 | -0.621609 | H | 4.822285  | 6.099441  | 2.561927  |
| H  | -4.955844 | -0.546885 | -1.019967 | C | 3.711598  | 4.516108  | 3.561068  |
| C  | -2.956238 | -0.441911 | 0.035360  | H | 3.988284  | 4.839496  | 4.575510  |
| C  | -2.852943 | 0.948070  | 0.243063  | C | 2.910573  | 3.380200  | 3.381678  |
| C  | -1.729341 | 1.567891  | 0.823592  | H | 2.554921  | 2.806578  | 4.250704  |
| C  | -1.573346 | 3.003089  | 0.956753  | N | 2.599908  | 3.271303  | -0.336076 |
| H  | -2.348913 | 3.738300  | 0.717186  | H | 2.616985  | 2.261458  | -0.537291 |
| C  | -0.297650 | 3.221591  | 1.416033  | C | 2.099053  | 4.029632  | -1.368207 |
| H  | 0.192428  | 4.173237  | 1.647572  | O | 1.791339  | 3.528821  | -2.452560 |
| C  | 0.325313  | 1.923027  | 1.556394  | C | 1.850054  | 5.504842  | -1.148525 |
| C  | 1.671324  | 1.738579  | 1.927370  | C | 0.563357  | 5.947895  | -0.739052 |
| C  | 2.253212  | 0.478640  | 2.159361  | H | -0.200753 | 5.196526  | -0.493871 |
| C  | 3.612305  | 0.287762  | 2.632124  | O | 0.265712  | 7.299158  | -0.676027 |
| H  | 4.335595  | 1.091381  | 2.803380  | H | -0.731876 | 7.639900  | -0.359947 |
| C  | 3.774830  | -1.057821 | 2.831995  | C | 1.252206  | 8.263811  | -1.023457 |
| H  | 4.657793  | -1.590029 | 3.201691  | C | 1.021411  | 9.666621  | -0.949842 |
| C  | 2.532424  | -1.692648 | 2.435839  | H | 0.031733  | 10.030292 | -0.631112 |
| C  | 2.340878  | -3.087164 | 2.425048  | C | 2.040131  | 10.548474 | -1.269770 |
| C  | -2.831707 | -5.089082 | -0.008531 | H | 1.893175  | 11.637384 | -1.219441 |
| C  | -3.987998 | -5.411023 | 0.762510  | C | 3.297557  | 10.016509 | -1.667095 |
| C  | -4.760559 | -6.543933 | 0.426029  | H | 4.126045  | 10.703440 | -1.919424 |
| H  | -5.647463 | -6.769482 | 1.029711  | N | 3.555611  | 8.721012  | -1.760852 |
| C  | -4.383726 | -7.344763 | -0.660074 | C | 2.563226  | 7.835793  | -1.455905 |
| H  | -4.996422 | -8.223710 | -0.912210 | C | 2.829931  | 6.424064  | -1.532929 |
| C  | -3.243019 | -7.042441 | -1.419553 | O | 4.046793  | 5.905888  | -1.860650 |
| H  | -2.953010 | -7.676443 | -2.270290 | C | 4.699263  | 6.324270  | -3.065599 |
| C  | -2.475012 | -5.916913 | -1.086772 | H | 4.033801  | 6.153542  | -3.939230 |
| H  | -1.581910 | -5.656514 | -1.674686 | H | 5.592399  | 5.678936  | -3.161289 |
| N  | -4.300805 | -4.565563 | 1.836786  | H | 4.987674  | 7.390846  | -3.013189 |
| H  | -3.622955 | -3.815617 | 1.996996  | C | 3.458703  | -3.970281 | 2.882523  |

|   |          |           |           |   |           |           |           |
|---|----------|-----------|-----------|---|-----------|-----------|-----------|
| C | 4.602989 | -4.185940 | 2.057722  | C | -4.534166 | -1.142185 | -3.402043 |
| C | 5.608016 | -5.081819 | 2.492038  | H | -3.803668 | -0.370931 | -3.692541 |
| H | 6.470560 | -5.249281 | 1.837274  | N | -5.252622 | -3.197760 | -0.405676 |
| C | 5.484709 | -5.732472 | 3.725828  | H | -4.652819 | -2.656713 | 0.231368  |
| H | 6.279462 | -6.423834 | 4.045270  | C | -5.508426 | -4.485683 | 0.022124  |
| C | 4.369848 | -5.513972 | 4.549144  | O | -6.222152 | -5.277795 | -0.596493 |
| H | 4.279016 | -6.024434 | 5.519236  | C | -4.748547 | -4.928847 | 1.259516  |
| C | 3.364784 | -4.637426 | 4.117066  | C | -4.818510 | -6.328036 | 1.511903  |
| H | 2.475982 | -4.456732 | 4.740297  | H | -5.481149 | -6.897426 | 0.843871  |
| N | 4.681032 | -3.481389 | 0.848527  | C | -4.092962 | -6.938820 | 2.515872  |
| H | 3.947480 | -2.778397 | 0.658446  | H | -4.163537 | -8.023919 | 2.684627  |
| C | 5.678702 | -3.516559 | -0.100925 | C | -3.209766 | -6.163933 | 3.316476  |
| O | 6.645046 | -4.282585 | -0.064897 | C | -2.360734 | -6.729337 | 4.311215  |
| C | 5.557651 | -2.496136 | -1.217905 | H | -2.419268 | -7.811143 | 4.510045  |
| C | 6.665751 | -2.473972 | -2.118253 | C | -1.462180 | -5.924596 | 4.991671  |
| H | 7.458164 | -3.211852 | -1.926442 | H | -0.783211 | -6.338060 | 5.751784  |
| C | 6.731046 | -1.589733 | -3.175711 | C | -1.421436 | -4.538386 | 4.676934  |
| H | 7.585924 | -1.604878 | -3.869300 | H | -0.689707 | -3.878815 | 5.177697  |
| C | 5.698560 | -0.627847 | -3.367912 | N | -2.217294 | -3.967948 | 3.786234  |
| C | 5.716451 | 0.338829  | -4.412359 | C | -3.111602 | -4.738640 | 3.104638  |
| H | 6.550244 | 0.335402  | -5.132313 | C | -3.942906 | -4.122097 | 2.095501  |
| C | 4.695057 | 1.269775  | -4.495131 | O | -3.941620 | -2.876213 | 1.862908  |
| H | 4.676111 | 2.033662  | -5.286340 | C | -3.607343 | -1.781956 | 2.828624  |
| C | 3.663314 | 1.245935  | -3.515940 | H | -4.043811 | -2.025661 | 3.816579  |
| H | 2.870806 | 2.014885  | -3.519328 | H | -4.052005 | -0.849258 | 2.432053  |
| N | 3.599526 | 0.349754  | -2.538005 | H | -2.512017 | -1.682403 | 2.937333  |
| C | 4.578902 | -0.597932 | -2.461471 | C | -2.503660 | 4.507643  | 0.612621  |
| C | 4.504667 | -1.588052 | -1.416386 | C | -2.151052 | 5.121446  | -0.628362 |
| O | 3.404365 | -1.598157 | -0.598495 | C | -2.412066 | 6.501168  | -0.806052 |
| C | 2.182520 | -2.061869 | -1.210707 | H | -2.101953 | 6.970796  | -1.745371 |
| H | 1.927208 | -1.486121 | -2.121188 | C | -3.039153 | 7.242141  | 0.202063  |
| H | 1.390628 | -1.922536 | -0.453570 | H | -3.234452 | 8.312268  | 0.033310  |
| H | 2.265945 | -3.144797 | -1.447970 | C | -3.418203 | 6.638197  | 1.409879  |

Conformation 8.

Multiplicity: 2

Charge: 0

E(B97-3c) = -6287.348705406908 Hartree

E(M06/def2-TZVP) = -6287.343554937966 Hartree

E(PBE - D3(BJ)/def2-TZVP) = -6285.165369469711 Hartree

E(PBE0 - D3(BJ)/def2-TZVP) = -6285.340672448954 Hartree

E(PBEh-3c) = -6277.934632264553 Hartree

E(PM6) = 259.34585 Kcal/mol

E(PM7) = 116.68290 Kcal/mol

E( $\omega$ B97X-V/def2-TZVP) = -6289.236062146734 Hartree

E(GFN1-xTB) = -298.855723892688 Hartree

E(GFN2-xTB) = -290.686496946523 Hartree

E(GFN-FF) = -36.570043816992 Hartree

Coordinates:

|    |           |           |           |   |           |           |           |
|----|-----------|-----------|-----------|---|-----------|-----------|-----------|
| Cu | -1.115358 | -0.188219 | 1.239497  | C | -0.735100 | -0.727325 | -5.729751 |
| N  | -1.474296 | -1.895579 | 0.218181  | H | -0.979207 | -1.792873 | -5.567730 |
| N  | -2.608213 | 0.728450  | 0.217924  | N | -0.902877 | 0.077988  | -4.692429 |
| N  | -0.675700 | 1.556791  | 2.172303  | C | -0.635910 | 1.405517  | -4.839483 |
| N  | 0.312550  | -1.119838 | 2.325356  | C | -0.821322 | 2.281309  | -3.701595 |
| C  | -0.757526 | -3.070906 | 0.302943  | O | -1.101725 | 1.786749  | -2.474205 |
| C  | -1.236457 | -4.018077 | -0.683966 | C | -0.440719 | 0.584855  | -2.012330 |
| H  | -0.829031 | -5.024116 | -0.829152 | H | -1.034612 | -0.305242 | -2.272618 |
| C  | -2.274510 | -3.408827 | -1.343691 | H | -0.387455 | 0.693450  | -0.916266 |
| H  | -2.895637 | -3.810034 | -2.151776 | H | 0.578803  | 0.511042  | -2.437030 |
| C  | -2.424706 | -2.088635 | -0.760679 | C | 1.878896  | 1.103382  | 4.984036  |
| C  | -3.441578 | -1.180111 | -1.127351 | C | 3.067697  | 1.884706  | 4.854510  |
| C  | -3.511195 | 0.141488  | -0.646388 | C | 3.870761  | 2.110696  | 5.998792  |
| C  | -4.461927 | 1.132589  | -1.115196 | H | 4.784729  | 2.702310  | 5.877444  |
| H  | -5.310097 | 0.922741  | -1.774859 | C | 3.495537  | 1.590012  | 7.242763  |
| C  | -4.063057 | 2.338393  | -0.596025 | H | 4.135588  | 1.782081  | 8.117782  |
| H  | -4.513745 | 3.327042  | -0.735993 | C | 2.322380  | 0.833818  | 7.381642  |
| C  | -2.896769 | 2.076184  | 0.223949  | H | 2.024719  | 0.429110  | 8.360265  |
| C  | -2.166476 | 3.079083  | 0.892324  | C | 1.530929  | 0.595454  | 6.250597  |
| C  | -1.149603 | 2.808461  | 1.832176  | H | 0.610202  | -0.001667 | 6.333440  |
| C  | -0.517374 | 3.817871  | 2.661663  | N | 3.382032  | 2.412512  | 3.594787  |
| H  | -0.693664 | 4.895101  | 2.585285  | H | 2.734988  | 2.202220  | 2.821670  |
| C  | 0.289774  | 3.153476  | 3.548544  | C | 4.387497  | 3.301961  | 3.270113  |
| H  | 0.908941  | 3.574016  | 4.347873  | O | 5.277647  | 3.642219  | 4.054956  |
| C  | 0.216647  | 1.746191  | 3.210968  | C | 4.329057  | 3.920051  | 1.886536  |
| C  | 1.011076  | 0.750842  | 3.814571  | C | 5.321766  | 4.916268  | 1.658067  |
| C  | 1.047147  | -0.587236 | 3.367486  | H | 6.031303  | 5.079494  | 2.481889  |
| C  | 1.934884  | -1.597225 | 3.911454  | C | 5.389959  | 5.637931  | 0.483798  |
| H  | 2.633267  | -1.435071 | 4.738435  | H | 6.166324  | 6.404041  | 0.335575  |
| C  | 1.732466  | -2.740392 | 3.180059  | C | 4.421262  | 5.420465  | -0.533548 |
| H  | 2.224797  | -3.712539 | 3.288434  | C | 4.379038  | 6.185966  | -1.733456 |
| C  | 0.722366  | -2.430935 | 2.189561  | H | 5.149428  | 6.954906  | -1.903138 |
| C  | 0.262997  | -3.351252 | 1.226770  | C | 3.363523  | 5.973551  | -2.649597 |
| C  | -4.473851 | -1.658218 | -2.094792 | H | 3.589577  | 6.559675  | -3.577317 |
| C  | -5.377093 | -2.693949 | -1.707872 | C | 2.389611  | 4.979932  | -2.360929 |
| C  | -6.314683 | -3.185641 | -2.640438 | H | 1.563948  | 4.806841  | -3.070800 |
| H  | -6.988390 | -3.992416 | -2.329133 | N | 2.405092  | 4.230847  | -1.268742 |
| C  | -6.353787 | -2.651921 | -3.936101 | C | 3.395020  | 4.420930  | -0.350762 |
| H  | -7.091210 | -3.043501 | -4.653289 | C | 3.394709  | 3.637167  | 0.866700  |
| C  | -5.470167 | -1.632522 | -4.324746 | O | 2.484010  | 2.663208  | 1.107869  |
| H  | -5.499980 | -1.225809 | -5.346367 | C | 1.870513  | 1.874947  | 0.079239  |

|   |           |           |           |   |           |           |           |
|---|-----------|-----------|-----------|---|-----------|-----------|-----------|
| H | 0.998701  | 2.400744  | -0.343623 | C | -1.092907 | -3.214314 | 0.783151  |
| H | 1.560893  | 0.935751  | 0.575788  | C | -2.183131 | -3.832719 | 1.418722  |
| H | 2.588280  | 1.661371  | -0.731263 | H | -2.665277 | -4.698942 | 0.940785  |
| C | 0.928283  | -4.690032 | 1.189143  | C | -2.674618 | -3.359422 | 2.643971  |
| C | 2.240611  | -4.801890 | 0.646130  | H | -3.532834 | -3.853815 | 3.123322  |
| C | 2.925974  | -6.034752 | 0.718524  | C | -2.078672 | -2.243039 | 3.243743  |
| H | 3.949463  | -6.093443 | 0.329564  | H | -2.476937 | -1.864038 | 4.197997  |
| C | 2.290924  | -7.148801 | 1.284356  | C | -0.975833 | -1.597765 | 2.656057  |
| H | 2.833177  | -8.105492 | 1.331489  | C | -0.613132 | -3.678816 | -0.587723 |
| C | 0.979363  | -7.059334 | 1.776537  | H | 0.438447  | -3.343113 | -0.697071 |
| H | 0.481587  | -7.938789 | 2.211013  | C | -0.625362 | -5.202756 | -0.763506 |
| C | 0.307747  | -5.829247 | 1.727992  | H | -0.051469 | -5.711087 | 0.038114  |
| H | -0.710342 | -5.734123 | 2.128407  | H | -0.173847 | -5.481907 | -1.737306 |
| N | 2.770327  | -3.658463 | 0.031287  | H | -1.655244 | -5.615730 | -0.754432 |
| H | 2.096916  | -2.915603 | -0.206133 | C | -1.424791 | -2.980018 | -1.695381 |
| C | 4.073503  | -3.391125 | -0.317861 | H | -1.424387 | -1.879253 | -1.552275 |
| O | 5.021505  | -4.147014 | -0.097143 | H | -2.485913 | -3.303907 | -1.673070 |
| C | 4.298596  | -2.053067 | -0.995682 | H | -1.012546 | -3.207702 | -2.700471 |
| C | 5.646157  | -1.583940 | -0.973741 | C | -0.336040 | -0.394138 | 3.339617  |
| H | 6.376799  | -2.216314 | -0.449332 | H | 0.525045  | -0.085790 | 2.711777  |
| C | 6.013675  | -0.396970 | -1.575909 | C | 0.204931  | -0.744657 | 4.736665  |
| H | 7.051465  | -0.035581 | -1.518867 | H | 0.921386  | -1.589939 | 4.704334  |
| C | 5.048726  | 0.373293  | -2.285533 | H | -0.614092 | -1.029566 | 5.429401  |
| C | 5.343336  | 1.618384  | -2.910725 | H | 0.727184  | 0.127277  | 5.181858  |
| H | 6.364348  | 2.024989  | -2.840411 | C | -1.301606 | 0.800334  | 3.408217  |
| C | 4.345280  | 2.299647  | -3.587634 | H | -1.641727 | 1.092919  | 2.398229  |
| H | 4.535545  | 3.272292  | -4.064145 | H | -0.806957 | 1.678021  | 3.872733  |
| C | 3.047091  | 1.722371  | -3.646623 | H | -2.200137 | 0.561071  | 4.014516  |
| H | 2.235955  | 2.241975  | -4.188384 | C | 1.174559  | 1.876320  | -1.651735 |
| N | 2.726965  | 0.575728  | -3.064707 | C | 0.390023  | 1.838635  | -2.843087 |
| C | 3.691297  | -0.099342 | -2.373395 | C | -0.022344 | 3.057228  | -3.411869 |
| C | 3.325716  | -1.303662 | -1.675302 | H | -0.618200 | 3.043825  | -4.337474 |
| O | 2.001337  | -1.665878 | -1.623224 | C | 0.314093  | 4.283293  | -2.824751 |
| C | 1.435077  | -2.235191 | -2.817888 | H | -0.007865 | 5.226254  | -3.291348 |
| H | 1.446520  | -1.494639 | -3.641538 | C | 1.041830  | 4.304319  | -1.624104 |
| H | 0.391788  | -2.502968 | -2.567304 | H | 1.275612  | 5.269853  | -1.151860 |
| H | 1.994186  | -3.150607 | -3.108377 | C | 1.465153  | 3.118241  | -1.005481 |

## QUHVAS

Conformation 16.

Multiplicity: 4

Charge: 0

E(B97-3c) = -3413.539581620455 Hartree

E(M06/def2-TZVP) = -3413.225808808773 Hartree

E(PBE - D3(BJ)/def2-TZVP) = -3412.100375520925 Hartree

E(PBE0 - D3(BJ)/def2-TZVP) = -3412.314778635724 Hartree

E(PBEh-3c) = -3408.877130841416 Hartree

E(PM6) = 95.08553 Kcal/mol

E(PM7) = 109.71159 Kcal/mol

E( $\omega$ B97X-V/def2-TZVP) = -3415.597894742145 Hartree

E(GFN1-xTB) = -148.541413151347 Hartree

E(GFN2-xTB) = -147.320508912646 Hartree

E(GFN-FF) = -20.504451894755 Hartree

Coordinates:

|    |           |           |           |   |           |           |           |
|----|-----------|-----------|-----------|---|-----------|-----------|-----------|
| Co | -0.135033 | 0.030378  | -0.336980 | N | -1.865150 | 0.354268  | -0.066474 |
| N  | 0.588906  | -1.427145 | 0.766997  | C | -2.996932 | 0.945529  | 0.053072  |
| N  | 1.528759  | 0.658613  | -1.025825 | C | -3.065739 | 2.401174  | 0.044656  |
| C  | 2.536625  | -2.876839 | 1.670887  | C | -2.148878 | 3.302895  | -0.176154 |
| C  | 1.893502  | -1.747278 | 0.789058  | H | -1.435010 | 2.931818  | -0.925655 |
| C  | 2.845146  | -1.044804 | 0.002896  | C | -2.152949 | 4.655305  | 0.189303  |
| H  | 3.861765  | -1.438206 | 0.074038  | H | -1.439089 | 5.344225  | -0.287166 |
| C  | 2.719056  | 0.067523  | -0.861254 | C | -3.059695 | 5.124722  | 1.154322  |
| C  | 4.018328  | 0.457329  | -1.636112 | H | -3.058291 | 6.186233  | 1.445935  |
| C  | 1.579016  | -3.766697 | 2.486729  | C | -3.971107 | 4.233247  | 1.744368  |
| H  | 2.194663  | -4.483149 | 3.068471  | H | -4.678956 | 4.592638  | 2.507192  |
| H  | 0.897053  | -4.354052 | 1.847111  | C | -3.982537 | 2.883281  | 1.365476  |
| H  | 0.957000  | -3.202667 | 3.202346  | H | -4.694742 | 2.184780  | 1.830251  |
| C  | 3.339372  | -3.840727 | 0.760715  | C | -4.269168 | 0.181803  | -0.138137 |
| H  | 3.768705  | -4.657273 | 1.376458  | C | -4.273260 | -1.209661 | 0.102714  |
| H  | 4.177696  | -3.350321 | 0.230561  | H | -3.349446 | -1.682231 | 0.462453  |
| H  | 2.680413  | -4.302771 | -0.002167 | C | -5.434321 | -1.963296 | -0.099580 |
| C  | 3.489727  | -2.186937 | 2.678096  | H | -5.422650 | -3.044497 | -0.109482 |
| H  | 3.987086  | -2.948844 | 3.313441  | C | -6.610122 | -1.342518 | -0.557540 |
| H  | 2.926655  | -1.502226 | 3.343865  | H | -7.523914 | -1.935217 | -0.717817 |
| H  | 4.276494  | -1.592905 | 2.174752  | C | -6.614569 | 0.039623  | -0.806285 |
| C  | 3.913203  | 1.698521  | -2.541515 | H | -7.529740 | 0.530986  | -1.171216 |
| H  | 4.869939  | 1.807966  | -3.091743 | C | -5.454829 | 0.799839  | -0.593411 |
| H  | 3.748863  | 2.630319  | -1.971223 | H | -5.460469 | 1.881413  | -0.795476 |
| H  | 3.105093  | 1.620360  | -3.291069 |   |           |           |           |
| C  | 4.381760  | -0.743355 | -2.545150 |   |           |           |           |
| H  | 5.303968  | -0.518687 | -3.120183 |   |           |           |           |
| H  | 3.567736  | -0.947956 | -3.270035 |   |           |           |           |
| H  | 4.554814  | -1.670294 | -1.965698 |   |           |           |           |
| C  | 5.168732  | 0.720678  | -0.635820 |   |           |           |           |
| H  | 6.088108  | 1.003897  | -1.188082 |   |           |           |           |
| H  | 5.411148  | -0.163591 | -0.016077 |   |           |           |           |
| H  | 4.914027  | 1.555098  | 0.048410  |   |           |           |           |
| C  | -0.472080 | -2.105129 | 1.427102  |   |           |           |           |

Conformation 20.

Multiplicity: 4

Charge: 0

E(B97-3c) = -3413.537101997373 Hartree

E(M06/def2-TZVP) = -3413.222595181089 Hartree

E(PBE - D3(BJ)/def2-TZVP) = -3412.098679869604 Hartree

E(PBE0 - D3(BJ)/def2-TZVP) = -3412.312788690261 Hartree

E(PBEh-3c) = -3408.871848368477 Hartree

E(PM6) = 98.56898 Kcal/mol

E(PM7) = 113.04935 Kcal/mol  
 E( $\omega$ B97X-V/def2-TZVP) = -3415.593775659198 Hartree  
 E(GFN1-xTB) = -148.535663096653 Hartree  
 E(GFN2-xTB) = -147.314873545114 Hartree  
 E(GFN-FF) = -20.502125605986 Hartree

Coordinates:

|    |           |           |           |
|----|-----------|-----------|-----------|
| Co | 0.253011  | 0.121641  | 0.146248  |
| N  | -1.268137 | -0.929560 | 0.802848  |
| N  | -0.498980 | 1.854874  | 0.427515  |
| C  | -3.580710 | -1.203577 | 1.877144  |
| C  | -2.366018 | -0.360834 | 1.350113  |
| C  | -2.474818 | 1.043648  | 1.496874  |
| H  | -3.371210 | 1.377552  | 2.017197  |
| C  | -1.622590 | 2.107823  | 1.104780  |
| C  | -2.063337 | 3.522817  | 1.599858  |
| C  | -4.766794 | -0.320806 | 2.324850  |
| H  | -5.602621 | -0.982563 | 2.628080  |
| H  | -5.136365 | 0.331473  | 1.509114  |
| H  | -4.521986 | 0.311832  | 3.200949  |
| C  | -4.121367 | -2.134451 | 0.772672  |
| H  | -5.038527 | -2.640640 | 1.136870  |
| H  | -3.394222 | -2.918557 | 0.503331  |
| H  | -4.386082 | -1.567175 | -0.141477 |
| C  | -3.171022 | -2.055156 | 3.098888  |
| H  | -4.067939 | -2.560799 | 3.512258  |
| H  | -2.734703 | -1.427423 | 3.901217  |
| H  | -2.441672 | -2.838401 | 2.827969  |
| C  | -2.017505 | 3.491765  | 3.149010  |
| H  | -2.314922 | 4.480260  | 3.556042  |
| H  | -0.992490 | 3.267469  | 3.507378  |
| H  | -2.695762 | 2.726463  | 3.572272  |
| C  | -3.506987 | 3.823750  | 1.134201  |
| H  | -3.812565 | 4.829400  | 1.488753  |
| H  | -4.243628 | 3.094802  | 1.522520  |
| H  | -3.578778 | 3.820162  | 0.027690  |
| C  | -1.177651 | 4.696278  | 1.142152  |
| H  | -1.544620 | 5.620658  | 1.632912  |
| H  | -1.214220 | 4.861131  | 0.050599  |
| H  | -0.116899 | 4.568100  | 1.423894  |
| C  | -0.950632 | -2.317055 | 0.731702  |
| C  | -1.185574 | -3.047514 | -0.471992 |
| C  | -0.765572 | -4.388774 | -0.535241 |
| H  | -0.945214 | -4.960755 | -1.458204 |
| C  | -0.124636 | -5.009059 | 0.543639  |
| H  | 0.187082  | -6.061969 | 0.473195  |
| C  | 0.141613  | -4.269531 | 1.703114  |
| H  | 0.677571  | -4.745887 | 2.537846  |
| C  | -0.238230 | -2.919985 | 1.814734  |
| C  | -1.835962 | -2.404319 | -1.696029 |
| H  | -2.286389 | -1.447318 | -1.361885 |
| C  | -0.785134 | -2.062087 | -2.767004 |
| H  | -0.027595 | -1.360431 | -2.374972 |
| H  | -1.266368 | -1.597100 | -3.651940 |
| H  | -0.253372 | -2.974663 | -3.108149 |
| C  | -2.946847 | -3.271729 | -2.312213 |
| H  | -3.700444 | -3.586456 | -1.565009 |
| H  | -2.532749 | -4.189197 | -2.779019 |
| C  | -3.470872 | -2.711336 | -3.113333 |
| H  | 0.195856  | -2.103829 | 3.032011  |
| H  | -0.456164 | -1.208641 | 3.080084  |
| C  | 1.641377  | -1.600230 | 2.849837  |
| H  | 1.765997  | -1.078180 | 1.879567  |
| H  | 2.360874  | -2.444825 | 2.853767  |
| H  | 1.922201  | -0.904253 | 3.667825  |
| C  | 0.061236  | -2.856035 | 4.363651  |
| H  | -0.958341 | -3.261678 | 4.514771  |
| H  | 0.289775  | -2.177911 | 5.211087  |
| H  | 0.774446  | -3.703537 | 4.430162  |
| C  | 0.382821  | 2.711731  | -0.270783 |
| C  | 1.726335  | 2.847690  | 0.193365  |
| C  | 2.615123  | 3.641838  | -0.553014 |
| H  | 3.649863  | 3.766075  | -0.200072 |
| C  | 2.208638  | 4.271730  | -1.735187 |
| C  | 2.916601  | 4.895640  | -2.300737 |
| C  | 0.902741  | 4.079475  | -2.213089 |
| H  | 0.601735  | 4.548562  | -3.161000 |
| C  | -0.023232 | 3.289236  | -1.514672 |
| C  | 2.190886  | 2.159916  | 1.473472  |
| H  | 1.425341  | 1.382437  | 1.717176  |
| C  | 3.533220  | 1.435289  | 1.305170  |
| H  | 3.491583  | 0.707795  | 0.471337  |
| H  | 3.787060  | 0.877529  | 2.229057  |
| H  | 4.363221  | 2.144395  | 1.108847  |
| C  | 2.219897  | 3.132545  | 2.664265  |
| H  | 1.230182  | 3.599034  | 2.837668  |
| H  | 2.948597  | 3.950594  | 2.485343  |
| H  | 2.518638  | 2.607487  | 3.594724  |
| C  | -1.401735 | 2.976037  | -2.085651 |
| H  | -2.107175 | 2.908513  | -1.232474 |
| C  | -1.387016 | 1.589109  | -2.756574 |

|   |           |           |           |
|---|-----------|-----------|-----------|
| H | -2.408803 | 1.281427  | -3.059369 |
| H | -0.987159 | 0.819017  | -2.066742 |
| H | -0.738643 | 1.587286  | -3.656174 |
| C | -1.943771 | 4.047712  | -3.036963 |
| H | -1.939030 | 5.054227  | -2.570722 |
| H | -2.986998 | 3.809115  | -3.326314 |
| H | -1.354129 | 4.104081  | -3.975206 |
| N | 1.529363  | -0.817697 | -0.671093 |
| C | 2.475184  | -1.164911 | -1.464857 |
| C | 2.583257  | -0.585400 | -2.842748 |
| C | 2.236210  | 0.764810  | -3.062297 |
| H | 1.952055  | 1.388954  | -2.204047 |
| C | 2.264731  | 1.360785  | -4.353233 |
| H | 2.006958  | 2.367002  | -4.499172 |
| C | 2.624286  | 0.504466  | -5.449234 |
| H | 2.641606  | 0.928916  | -6.464803 |
| C | 2.966120  | -0.842263 | -5.242528 |
| H | 3.241988  | -1.478673 | -6.097487 |
| C | 2.956188  | -1.382049 | -3.948365 |
| H | 3.219660  | -2.438418 | -3.788559 |
| C | 3.477651  | -2.184664 | -1.022440 |
| C | 3.075253  | -3.190029 | -0.116639 |
| H | 2.023801  | -3.222183 | 0.200180  |
| C | 3.997010  | -4.129971 | 0.357760  |
| H | 3.661947  | -4.916145 | 1.052412  |
| C | 5.339822  | -4.074849 | -0.055482 |
| H | 6.066100  | -4.812427 | 0.319276  |
| C | 5.750661  | -3.075814 | -0.953071 |
| H | 6.801931  | -3.023525 | -1.275985 |
| C | 4.825973  | -2.139906 | -1.440242 |
| H | 5.151640  | -1.355200 | -2.139754 |

Conformation 21.

Multiplicity: 4

Charge: 0

E(B97-3c) = -3413.535794721675 Hartree  
 E(M06/def2-TZVP) = -3413.221368215538 Hartree  
 E(PBE - D3(BJ)/def2-TZVP) = -3412.097389635454 Hartree  
 E(PBE0 - D3(BJ)/def2-TZVP) = -3412.312508426199 Hartree  
 E(PBEh-3c) = -3408.871439088500 Hartree  
 E(PM6) = 99.56668 Kcal/mol  
 E(PM7) = 107.19404 Kcal/mol  
 E( $\omega$ B97X-V/def2-TZVP) = -3415.592108477200 Hartree  
 E(GFN1-xTB) = -148.533934476783 Hartree  
 E(GFN2-xTB) = -147.311344835929 Hartree  
 E(GFN-FF) = -20.493475506248 Hartree

Coordinates:

|    |           |           |           |
|----|-----------|-----------|-----------|
| Co | -0.063504 | -0.442176 | 0.430065  |
| N  | 0.872075  | -0.398027 | -1.320972 |
| N  | -1.825498 | -0.841831 | -0.236113 |
| C  | 0.925921  | -0.779436 | -3.892851 |
| C  | 0.251307  | -0.707443 | -2.471938 |
| C  | -1.127114 | -1.052104 | -2.510432 |
| H  | -1.488826 | -1.310049 | -3.507905 |
| C  | -2.132898 | -1.088898 | -1.518809 |
| C  | -3.559504 | -2.054684 | -2.054362 |
| C  | 0.850098  | -2.252828 | -4.367878 |
| H  | 1.319099  | -2.349205 | -5.368935 |
| H  | -0.189485 | -2.625137 | -4.442445 |
| H  | 1.397801  | -2.918624 | -3.670815 |
| C  | 0.136074  | 0.126511  | -4.871290 |
| H  | 0.609731  | 0.092348  | -5.873766 |
| H  | 0.143586  | 1.180175  | -4.527264 |
| H  | -0.920393 | -0.178490 | -4.991638 |
| C  | 2.403299  | -0.355297 | -4.014322 |
| H  | 2.691351  | -0.445030 | -5.082008 |
| H  | 3.087480  | -0.993359 | -3.430471 |
| H  | 2.580887  | 0.689560  | -3.707011 |
| C  | -3.483844 | -2.830293 | -2.768292 |
| H  | -4.486400 | -3.100319 | -3.158956 |
| H  | -3.168364 | -3.629158 | -2.068823 |
| H  | -2.780430 | -2.832257 | -3.622299 |
| C  | -4.005523 | -0.386553 | -3.080369 |
| H  | -5.010743 | -0.642350 | -3.474212 |
| H  | -3.312056 | -0.312277 | -3.940362 |
| H  | -4.071363 | 0.616010  | -2.613666 |
| C  | -4.666641 | -1.569129 | -0.989358 |
| H  | -5.591994 | -1.925608 | -1.486087 |
| H  | -4.897407 | -0.603432 | -0.507335 |
| H  | -4.415952 | -2.289286 | -0.190849 |
| C  | 2.231105  | 0.002874  | -1.196519 |
| C  | 2.561940  | 1.387077  | -1.224579 |
| C  | 3.915307  | 1.754828  | -1.113976 |
| H  | 4.185599  | 2.821738  | -1.151757 |
| C  | 4.923826  | 0.795751  | -0.958177 |
| H  | 5.977196  | 1.105568  | -0.885873 |
| C  | 4.575664  | -0.557582 | -0.856161 |
| H  | 5.362025  | -1.309703 | -0.687964 |
| C  | 3.236355  | -0.974991 | -0.953100 |
| C  | 1.492960  | 2.465773  | -1.368321 |

|   |           |           |           |   |           |           |           |
|---|-----------|-----------|-----------|---|-----------|-----------|-----------|
| H | 0.510693  | 1.951461  | -1.389307 | N | 1.588373  | -0.130306 | -0.977502 |
| C | 1.491377  | 3.413728  | -0.157450 | C | -1.340369 | -3.660095 | -1.175660 |
| H | 1.329572  | 2.856563  | 0.783237  | C | -0.629804 | -2.258548 | -1.098287 |
| H | 0.683932  | 4.168350  | -0.250631 | C | 0.700031  | -2.271449 | -1.606204 |
| H | 2.452450  | 3.961894  | -0.070471 | H | 0.970918  | -3.202185 | -2.107764 |
| C | 1.635820  | 3.260325  | -2.677852 | C | 1.741778  | -1.316941 | -1.592437 |
| H | 1.597568  | 2.603241  | -3.568905 | C | 2.994293  | -1.708320 | -2.441373 |
| H | 2.599217  | 3.810739  | -2.711085 | C | -2.855688 | -3.667729 | -0.898945 |
| H | 0.821245  | 4.007837  | -2.771725 | H | -3.221392 | -4.709991 | -0.999778 |
| C | 2.877229  | -2.441587 | -0.747007 | H | -3.416661 | -3.040999 | -1.615182 |
| H | 1.811012  | -2.559182 | -1.031511 | H | -3.111439 | -3.320703 | 0.114571  |
| C | 3.009019  | -2.800029 | 0.745079  | C | -1.150317 | -4.329366 | -2.560380 |
| H | 2.428847  | -2.094373 | 1.371206  | H | -1.689212 | -5.298374 | -2.564365 |
| H | 4.067567  | -2.738583 | 1.072507  | H | -0.093443 | -4.551844 | -2.800837 |
| H | 2.651221  | -3.832262 | 0.941091  | H | -1.567085 | -3.711434 | -3.378262 |
| C | 3.699674  | -3.398970 | -1.623008 | C | -0.645475 | -4.552942 | -0.116212 |
| H | 3.616040  | -3.147504 | -2.699457 | H | -1.119705 | -5.556277 | -0.095332 |
| H | 3.353439  | -4.444286 | -1.488343 | H | -0.727683 | -4.114501 | 0.896810  |
| H | 4.776534  | -3.373962 | -1.356675 | H | 0.431969  | -4.682149 | -0.337802 |
| C | -2.667336 | -0.649497 | 0.884605  | C | 2.517105  | -1.784229 | -3.915079 |
| C | -3.374942 | 0.585591  | 1.030532  | H | 3.367190  | -2.054698 | -4.575355 |
| C | -4.179825 | 0.770718  | 2.164491  | H | 2.124616  | -0.801905 | -4.248888 |
| H | -4.741908 | 1.709630  | 2.275490  | H | 1.715260  | -2.533738 | -4.058217 |
| C | -4.267188 | -0.208228 | 3.164285  | C | 3.541171  | -3.085883 | -2.003426 |
| H | -4.905717 | -0.047503 | 4.045909  | H | 4.440991  | -3.339991 | -2.600609 |
| C | -3.514527 | -1.383151 | 3.044446  | H | 2.808621  | -3.903185 | -2.146852 |
| H | -3.555570 | -2.142920 | 3.841369  | H | 3.833435  | -3.077381 | -0.935603 |
| C | -2.701588 | -1.630837 | 1.922071  | C | 4.163734  | -0.708170 | -2.407992 |
| C | -3.195866 | 1.698269  | 0.004683  | H | 4.942375  | -1.060705 | -3.114769 |
| H | -2.912894 | 1.220199  | -0.953676 | H | 4.630705  | -0.619022 | -1.411820 |
| C | -4.466095 | 2.518520  | -0.250010 | H | 3.860310  | 0.305673  | -2.724922 |
| H | -5.326850 | 1.872360  | -0.518215 | C | -2.507503 | -0.898884 | -0.214623 |
| H | -4.301128 | 3.231545  | -1.083077 | C | -3.351022 | -0.343620 | -1.231321 |
| H | -4.757107 | 3.119848  | 0.635905  | C | -4.701500 | -0.094210 | -0.929416 |
| C | -2.015465 | 2.600921  | 0.408166  | H | -5.351835 | 0.309024  | -1.722468 |
| H | -1.103161 | 1.999361  | 0.598692  | C | -5.218469 | -0.308832 | 0.353697  |
| H | -2.231970 | 3.159436  | 1.341501  | H | -6.274655 | -0.096462 | 0.575765  |
| H | -1.785241 | 3.331404  | -0.394202 | C | -4.351340 | -0.732095 | 1.362418  |
| C | -1.910808 | -2.938968 | 1.883723  | H | -4.730021 | -0.831710 | 2.392383  |
| H | -2.092612 | -3.408790 | 2.874534  | C | -2.992741 | -1.026011 | 1.120686  |
| C | -0.389079 | -2.755174 | 1.781732  | C | -2.870729 | 0.070987  | -2.626576 |
| H | 0.139928  | -3.708381 | 1.987858  | H | -3.738427 | 0.616832  | -3.055920 |
| H | -0.001533 | -2.003041 | 2.496205  | C | -1.715174 | 1.084395  | -2.606173 |
| H | -0.069976 | -2.487707 | 0.740530  | H | -1.883308 | 1.884546  | -1.860174 |
| C | -2.405669 | -3.934592 | 0.822304  | H | -1.587949 | 1.558538  | -3.601403 |
| H | -3.493880 | -4.121552 | 0.913328  | H | -0.744341 | 0.578012  | -2.391149 |
| H | -1.882862 | -4.906918 | 0.932519  | C | -2.566281 | -1.079003 | -3.598451 |
| H | -2.200752 | -3.559094 | -0.198734 | H | -3.392908 | -1.816149 | -3.631744 |
| N | 0.963398  | 0.318806  | 1.684879  | H | -1.634026 | -1.630370 | -3.321602 |
| C | 1.299950  | 1.015162  | 2.707392  | H | -2.426288 | -0.681519 | -4.625179 |
| C | 2.683802  | 0.921285  | 3.271110  | C | -2.206069 | -1.467667 | 2.365141  |
| C | 3.740403  | 0.504254  | 2.433004  | H | -2.544933 | -0.753498 | 3.149427  |
| H | 3.520155  | 0.293007  | 1.378838  | C | -0.678489 | -1.361991 | 2.353825  |
| C | 5.040210  | 0.376356  | 2.933585  | H | -0.344409 | -0.351518 | 2.049042  |
| H | 5.851486  | 0.064130  | 2.257522  | H | -0.195251 | -2.099554 | 1.685321  |
| C | 5.308400  | 0.654658  | 4.285477  | H | -0.296769 | -1.542352 | 3.379197  |
| H | 6.331033  | 0.554512  | 4.680708  | C | -2.641978 | -2.867526 | 2.846859  |
| C | 4.263875  | 1.066251  | 5.129431  | H | -3.742888 | -2.948506 | 2.941240  |
| H | 4.464443  | 1.281275  | 6.190454  | H | -2.194924 | -3.091172 | 3.837305  |
| C | 2.961288  | 1.204362  | 4.627064  | H | -2.309777 | -3.658525 | 2.146067  |
| H | 2.146233  | 1.523788  | 5.293656  | C | 2.579195  | 0.780785  | -0.523922 |
| C | 0.332226  | 1.962802  | 3.357386  | C | 3.401628  | 0.447805  | 0.597720  |
| C | 0.711760  | 3.293065  | 3.644309  | C | 4.301162  | 1.413905  | 1.080545  |
| H | 1.740060  | 3.619087  | 3.425659  | H | 4.942712  | 1.160514  | 1.938892  |
| C | -0.212444 | 4.196799  | 4.186614  | C | 4.388479  | 2.690337  | 0.510545  |
| H | 0.092068  | 5.235448  | 4.388131  | H | 5.096225  | 3.431428  | 0.911410  |
| C | -1.520715 | 3.776364  | 4.478979  | C | 3.559356  | 3.016002  | -0.570117 |
| H | -2.242448 | 4.481192  | 4.919595  | H | 3.620745  | 4.019857  | -1.018454 |
| C | -1.901575 | 2.452112  | 4.208659  | C | 2.656704  | 2.082016  | -1.107045 |
| H | -2.921569 | 2.109498  | 4.435812  | C | 3.301768  | -0.895303 | 1.314405  |
| C | -0.987854 | 1.555282  | 3.637385  | H | 2.595041  | -1.531088 | 0.744274  |
| H | -1.297769 | 0.524995  | 3.405889  | C | 4.652060  | -1.630006 | 1.379385  |
| H |           |           |           | H | 5.110603  | -1.751187 | 0.378354  |
| H |           |           |           | H | 4.524913  | -2.639361 | 1.821770  |
| H |           |           |           | H | 5.379369  | -1.082541 | 2.013918  |
| C |           |           |           | C | 2.723112  | -0.716587 | 2.728993  |
| H |           |           |           | H | 1.775690  | -0.148139 | 2.712223  |
| H |           |           |           | H | 3.425899  | -0.158458 | 3.381490  |
| H |           |           |           | H | 2.530962  | -1.701847 | 3.201181  |
| H |           |           |           | C | 1.786209  | 2.474450  | -2.294344 |
| C |           |           |           | H | 1.227581  | 1.565673  | -2.599729 |
| C |           |           |           | C | 2.620507  | 2.922995  | -3.505675 |
| H |           |           |           | H | 1.963022  | 3.139144  | -4.372656 |
| H |           |           |           | H | 3.344919  | 2.142197  | -3.813182 |
| H |           |           |           | H | 3.195936  | 3.846325  | -3.287332 |
| C |           |           |           | C | 0.759419  | 3.549495  | -1.896455 |
| H |           |           |           | H | 0.134785  | 3.213011  | -1.043477 |
| H |           |           |           | H | 0.083791  | 3.787468  | -2.743450 |
| H |           |           |           | H | 1.263269  | 4.489796  | -1.590601 |
| N |           |           |           | N | -0.976419 | 1.630651  | 0.760727  |
| C |           |           |           | C | -1.217696 | 2.369947  | 1.779776  |

Conformation 24.

Multiplicity: 4

Charge: 0

E(B97-3c) = -3413.522213598330 Hartree

E(M06/def2-TZVP) = -3413.209283793482 Hartree

E(PBE - D3(BJ)/def2-TZVP) = -3412.084606376122 Hartree

E(PBE0 - D3(BJ)/def2-TZVP) = -3412.298501840146 Hartree

E(PBEh-3c) = -3408.856680718656 Hartree

E(PM6) = 105.36936 Kcal/mol

E(PM7) = 118.40729 Kcal/mol

E( $\omega$ B97X-V/def2-TZVP) = -3415.576821403597 Hartree

E(GFN1-xTB) = -148.524828018604 Hartree

E(GFN2-xTB) = -147.299872495061 Hartree

E(GFN-FF) = -20.494233203666 Hartree

Coordinates:

|    |           |           |           |
|----|-----------|-----------|-----------|
| Co | -0.091171 | 0.500574  | -0.303213 |
| N  | -1.150774 | -1.153966 | -0.547752 |



|   |           |          |          |
|---|-----------|----------|----------|
| C | -2.488557 | 3.152291 | 1.870471 |
| C | -3.574556 | 2.793098 | 1.040231 |
| H | -3.458808 | 1.926680 | 0.374399 |
| C | -4.771895 | 3.514096 | 1.080873 |
| H | -5.611278 | 3.207243 | 0.437581 |
| C | -4.906338 | 4.615754 | 1.944873 |
| H | -5.849028 | 5.183375 | 1.977716 |
| C | -3.830592 | 4.987559 | 2.766979 |
| H | -3.925019 | 5.853837 | 3.439890 |
| C | -2.630662 | 2.651240 | 2.734128 |
| H | -1.789150 | 4.563934 | 3.374681 |
| C | -0.226177 | 2.443533 | 2.904665 |
| C | 1.140574  | 2.622366 | 2.622366 |
| H | 1.460247  | 2.798492 | 1.579737 |
| C | 2.083168  | 2.678679 | 3.659367 |
| H | 3.141808  | 2.857355 | 3.419395 |
| C | 1.680085  | 2.467596 | 4.987800 |
| H | 2.422551  | 2.480057 | 5.800381 |
| C | 0.324432  | 2.237347 | 5.275911 |
| H | 0.003505  | 2.059174 | 6.313920 |
| C | -0.625052 | 2.238207 | 4.243882 |
| H | -1.688856 | 2.066022 | 4.468850 |

Conformation 25.

Multiplicity: 4

Charge: 0

E(B97-3c) = -3413.534120938863 Hartree

E(M06/def2-TZVP) = -3413.218951084109 Hartree

E(PBE - D3(BJ)/def2-TZVP) = -3412.095580918157 Hartree

E(PBE0 - D3(BJ)/def2-TZVP) = -3412.309826816540 Hartree

E(PBEh-3c) = -3408.866317617005 Hartree

E(PM6) = 101.74523 Kcal/mol

E(PM7) = 113.44669 Kcal/mol

E( $\omega$ B97X-V/def2-TZVP) = -3415.587721198738 Hartree

E(GFN1-xTB) = -148.531934483411 Hartree

E(GFN2-xTB) = -147.310010848297 Hartree

E(GFN-FF) = -20.495824033238 Hartree

Coordinates:

|    |           |           |           |
|----|-----------|-----------|-----------|
| Co | 0.217598  | -0.409987 | -0.096342 |
| N  | 0.128325  | 0.292893  | 1.748532  |
| N  | -1.562905 | -1.110090 | -0.192172 |
| C  | -1.163725 | 0.845506  | 3.920626  |
| C  | -0.960562 | 0.166169  | 2.518386  |
| C  | -2.101575 | -0.568137 | 2.079826  |
| H  | -2.879533 | -0.657650 | 2.835042  |
| C  | -2.421254 | -1.173799 | 0.848536  |
| C  | -3.767831 | -1.964179 | 0.758084  |
| C  | -2.115902 | 2.044260  | 3.676920  |
| H  | -2.305259 | 2.579150  | 4.630908  |
| H  | -3.089496 | 1.712375  | 3.265852  |
| H  | -1.676098 | 2.767110  | 2.963291  |
| C  | -1.838259 | -0.120667 | 4.928434  |
| H  | -1.884485 | 0.370806  | 5.920911  |
| H  | -1.260476 | -1.058253 | 5.042337  |
| H  | -2.877280 | -0.388442 | 4.658176  |
| C  | 0.102445  | 1.372558  | 4.624275  |
| H  | -0.199990 | 1.801248  | 5.601620  |
| H  | 0.618635  | 2.164995  | 4.060019  |
| H  | 0.840581  | 0.574411  | 4.822507  |
| C  | -3.503850 | -3.358946 | 0.152230  |
| H  | -4.433855 | -3.962323 | 0.185287  |
| H  | -2.722985 | -3.904065 | 0.719776  |
| H  | -3.188035 | -3.295340 | -0.903853 |
| C  | -4.819783 | -1.228251 | -0.102174 |
| H  | -5.775483 | -1.791605 | -0.072954 |
| H  | -4.514038 | -1.146643 | -1.160657 |
| H  | -5.016740 | -0.209968 | 0.288106  |
| C  | -4.401452 | -2.189812 | 2.148018  |
| H  | -5.295420 | -2.834469 | 2.030865  |
| H  | -4.743648 | -1.246221 | 2.617564  |
| H  | -3.706838 | -2.697055 | 2.846266  |
| C  | 1.401433  | 0.792191  | 2.133857  |
| C  | 2.378174  | -0.122331 | 2.629154  |
| C  | 3.635451  | 0.387952  | 3.005269  |
| H  | 4.384658  | -0.311486 | 3.410241  |
| C  | 3.960849  | 1.741279  | 2.848459  |
| H  | 4.952712  | 2.113148  | 3.145585  |
| C  | 3.023511  | 2.604258  | 2.268804  |
| H  | 3.290593  | 3.659364  | 2.101724  |
| C  | 1.743471  | 2.155581  | 1.898555  |
| C  | 2.173679  | -1.636523 | 2.726200  |
| C  | 3.168811  | -2.025495 | 3.033394  |
| C  | 1.178451  | -2.103589 | 3.800164  |
| H  | 1.399875  | -1.651154 | 4.787379  |
| H  | 1.233946  | -3.205980 | 3.915428  |
| H  | 0.135136  | -1.853859 | 3.526300  |
| C  | 1.873076  | -2.304640 | 1.373497  |
| C  | 2.551614  | -1.944995 | 0.577346  |
| H  | 0.814107  | -2.132366 | 1.057992  |
| H  | 1.976586  | -3.406943 | 1.450823  |

|   |           |           |           |
|---|-----------|-----------|-----------|
| C | 0.762221  | 3.130183  | 1.255960  |
| H | -0.198368 | 2.589222  | 1.130966  |
| C | 1.235472  | 3.551294  | -0.146338 |
| H | 1.353903  | 2.673495  | -0.805734 |
| H | 2.212754  | 4.075211  | -0.098628 |
| C | 0.504936  | 4.240488  | -0.617463 |
| H | 0.505359  | 4.370883  | 2.128986  |
| H | 0.183038  | 4.103862  | 3.154648  |
| H | -0.284558 | 5.005502  | 1.677296  |
| H | 1.417518  | 4.996380  | 2.218746  |
| C | -1.852661 | -1.271812 | -1.572939 |
| C | -2.537503 | -0.217749 | -2.261344 |
| C | -2.789287 | -0.366164 | -3.634618 |
| H | -3.329069 | 0.428682  | -4.169731 |
| C | -2.340941 | -1.490939 | -4.342592 |
| H | -2.547233 | -1.586039 | -5.419367 |
| C | -1.606200 | -2.478510 | -3.676592 |
| H | -1.224623 | -3.343088 | -4.240752 |
| C | -1.347751 | -2.349326 | -2.295801 |
| C | -2.880778 | 1.082488  | -1.538663 |
| H | -3.057408 | 0.839750  | -0.472562 |
| C | -1.674241 | 2.037878  | -1.581936 |
| H | -0.742692 | 1.540991  | -1.235780 |
| H | -1.845778 | 2.923370  | -0.936694 |
| H | -1.475935 | 2.387262  | -2.615358 |
| C | -4.139534 | 1.779410  | -2.068563 |
| H | -5.016223 | 1.101335  | -2.076207 |
| H | -3.996454 | 2.162721  | -3.099948 |
| H | -4.388519 | 2.653808  | -1.433796 |
| C | -0.490891 | -3.457137 | -1.616727 |
| H | -0.600249 | -3.309360 | -0.522140 |
| C | 0.993083  | -3.251305 | -1.975075 |
| H | 1.635902  | -3.986385 | -1.448560 |
| H | 1.341617  | -2.235121 | -1.699714 |
| H | 1.155902  | -3.372205 | -3.066066 |
| C | -0.933220 | -4.892329 | -1.940805 |
| H | -2.002661 | -5.056782 | -1.704123 |
| H | -0.336251 | -5.620390 | -1.354531 |
| H | -0.782301 | -5.136722 | -3.012534 |
| N | 1.657645  | 0.166187  | -0.981753 |
| C | 2.429732  | 0.556065  | -1.928886 |
| C | 3.912601  | 0.407434  | -1.793974 |
| C | 4.481359  | 0.344634  | -0.502261 |
| H | 3.820491  | 0.452837  | 0.368439  |
| C | 5.858787  | 0.162949  | -0.338421 |
| H | 6.283633  | 0.130611  | 0.677056  |
| C | 6.694018  | 0.031664  | -1.461960 |
| H | 7.778002  | -0.111707 | -1.333928 |
| C | 6.138019  | 0.087521  | -2.750400 |
| H | 6.784710  | -0.021407 | -3.634783 |
| C | 4.758373  | 0.278461  | -2.918046 |
| H | 4.326950  | 0.313401  | -3.929537 |
| C | 1.871371  | 1.178391  | -3.173541 |
| C | 0.716271  | 0.636489  | -3.775505 |
| H | 0.259384  | -0.268887 | -3.349079 |
| C | 0.156419  | 1.242145  | -4.908515 |
| H | -0.735148 | 0.795593  | -5.372944 |
| C | 0.726025  | 2.409749  | -5.442357 |
| H | 0.281408  | 2.887294  | -6.328997 |
| C | 1.867431  | 2.865189  | -4.840723 |
| H | 2.313968  | 3.885631  | -5.247590 |
| C | 2.443341  | 2.348446  | -3.721280 |
| H | 3.337873  | 2.783464  | -3.250346 |

Conformation 26.

Multiplicity: 4

Charge: 0

E(B97-3c) = -3413.527433727270 Hartree

E(M06/def2-TZVP) = -3413.214203684880 Hartree

E(PBE - D3(BJ)/def2-TZVP) = -3412.089406301248 Hartree

E(PBE0 - D3(BJ)/def2-TZVP) = -3412.304146377179 Hartree

E(PBEh-3c) = -3408.864841198544 Hartree

E(PM6) = 101.41495 Kcal/mol

E(PM7) = 116.72492 Kcal/mol

E( $\omega$ B97X-V/def2-TZVP) = -3415.587044619962 Hartree

E(GFN1-xTB) = -148.527441701144 Hartree

E(GFN2-xTB) = -147.305221332721 Hartree

E(GFN-FF) = -20.492337919882 Hartree

Coordinates:

|    |           |           |           |
|----|-----------|-----------|-----------|
| Co | 0.099354  | -0.336096 | -0.050237 |
| N  | -1.675722 | -1.037815 | 0.075784  |
| N  | -0.106581 | 1.168039  | 1.217054  |
| C  | -3.981119 | -1.348982 | 1.124036  |
| C  | -2.613951 | -0.612522 | 0.943738  |
| C  | -2.378130 | 0.528152  | 1.740116  |
| H  | -3.216457 | 0.810051  | 2.374760  |
| C  | -1.251610 | 1.391199  | 1.876049  |
| C  | -1.524847 | 2.592288  | 2.853450  |
| C  | -4.860923 | -0.705079 | 2.216482  |
| H  | -5.801116 | -1.285411 | 2.302953  |

|   |           |           |           |                                                            |           |           |            |
|---|-----------|-----------|-----------|------------------------------------------------------------|-----------|-----------|------------|
| H | -5.141739 | 0.338993  | 1.973891  | C                                                          | 4.453454  | 0.183741  | -0.273820  |
| H | -4.370936 | -0.716070 | 3.210101  | H                                                          | 3.730801  | 0.780163  | 0.299155   |
| C | -4.794379 | -1.322083 | -0.185701 | C                                                          | 2.190175  | -0.478081 | -3.260607  |
| H | -5.779428 | -1.806335 | -0.024482 | C                                                          | 1.049766  | -1.206368 | -3.659609  |
| H | -4.286180 | -1.861645 | -1.004025 | H                                                          | 0.478756  | -1.763939 | -2.902491  |
| H | -4.979742 | -0.279540 | -0.512930 | C                                                          | 0.658948  | -1.234410 | -5.005160  |
| C | -3.743569 | -2.814955 | 1.547295  | H                                                          | -0.219513 | -1.827601 | -5.303000  |
| H | -4.715864 | -3.292778 | 1.784733  | C                                                          | 1.388260  | -0.517767 | -5.969040  |
| H | -3.106614 | -2.875706 | 2.452394  | H                                                          | 1.076385  | -0.533067 | -7.024447  |
| H | -3.271885 | -3.408754 | 0.744378  | C                                                          | 2.522277  | 0.214472  | -5.580470  |
| C | -1.947816 | 2.029868  | 4.234091  | H                                                          | 3.097508  | 0.780467  | -6.329620  |
| H | -2.109786 | 2.868970  | 4.941165  | C                                                          | 2.927986  | 0.225822  | -4.238298  |
| H | -1.154483 | 1.380314  | 4.656000  | H                                                          | 3.818065  | 0.797175  | -3.933911  |
| H | -2.883696 | 1.441018  | 4.198161  |                                                            |           |           |            |
| C | -2.678910 | 3.428809  | 2.246161  | Conformation 27.                                           |           |           |            |
| H | -2.904308 | 4.293207  | 2.904088  | Multiplicity: 4                                            |           |           |            |
| H | -3.608393 | 2.841564  | 2.122468  | Charge: 0                                                  |           |           |            |
| H | -2.393200 | 3.823037  | 1.249991  | E(B97-3c) = -3413.527900609814 Hartree                     |           |           |            |
| C | -0.365962 | 3.570864  | 3.125898  | E(M06/def2-TZVP) = -3413.218268966413 Hartree              |           |           |            |
| H | -0.749163 | 4.366066  | 3.797583  | E(PBE - D3(BJ)/def2-TZVP) = -3412.089538559284 Hartree     |           |           |            |
| H | 0.014246  | 4.059903  | 2.213806  | E(PBE0 - D3(BJ)/def2-TZVP) = -3412.305313805650 Hartree    |           |           |            |
| H | 0.493781  | 3.095453  | 3.628930  | E(PBEh-3c) = -3408.861985515107 Hartree                    |           |           |            |
| C | -1.729035 | -2.070544 | -0.898051 | E(PM6) = 104.83845 Kcal/mol                                |           |           |            |
| C | -1.208636 | -3.362363 | -0.543477 | E(PM7) = 111.70127 Kcal/mol                                |           |           |            |
| C | -1.219392 | -4.391609 | -1.495370 | E( $\omega$ B97X-V/def2-TZVP) = -3415.582289098760 Hartree |           |           |            |
| H | -0.831200 | -5.383441 | -1.220448 | E(GFN1-xTB) = -148.527088177185 Hartree                    |           |           |            |
| C | -1.703376 | -4.171365 | -2.791243 | E(GFN2-xTB) = -147.303018689219 Hartree                    |           |           |            |
| H | -1.714409 | -4.989226 | -3.526802 | E(GFN-FF) = -20.492925981894 Hartree                       |           |           |            |
| C | -2.124275 | -2.889840 | -3.153806 |                                                            |           |           |            |
| H | -2.442637 | -2.706601 | -4.192494 | Coordinates:                                               |           |           |            |
| C | -2.125774 | -1.804443 | -2.250222 | Co                                                         | 0.315487  | -0.117045 | -0.137706  |
| C | -0.534034 | -3.588286 | 0.806992  | N                                                          | -0.479683 | 1.076984  | 1.265000   |
| H | -0.892138 | -2.798576 | 1.497690  | N                                                          | -0.475661 | 0.709218  | -1.690937  |
| H | -0.846151 | -4.947438 | 1.447047  | C                                                          | -1.577513 | 3.331105  | 1.904620   |
| H | -1.935610 | -5.119624 | 1.550384  | C                                                          | -1.203505 | 2.155317  | 0.922368   |
| H | -0.392617 | -5.005554 | 2.457183  | C                                                          | -1.580603 | 2.414000  | -0.424099  |
| H | -0.424937 | -5.787540 | 0.857647  | H                                                          | -2.205619 | 3.298155  | -0.537148  |
| C | 0.987347  | -3.405771 | 0.648712  | C                                                          | -1.288760 | 1.775593  | -1.652881  |
| H | 1.238404  | -2.422364 | 0.192432  | C                                                          | -2.027229 | 2.383957  | -2.894328  |
| H | 1.413450  | -4.181301 | -0.020818 | C                                                          | -2.979384 | 3.918549  | -2.959386  |
| H | 1.504788  | -3.466381 | 1.626861  | H                                                          | -3.230074 | 4.669832  | 2.374663   |
| C | -2.456553 | -0.438309 | -2.883957 | H                                                          | -3.765158 | 3.138212  | 1.619335   |
| H | -1.775202 | -0.404889 | -3.764235 | H                                                          | -3.038377 | 4.440884  | 0.625471   |
| C | -2.143733 | 0.833422  | -2.088836 | C                                                          | -1.571040 | 3.016691  | 3.415005   |
| H | -1.080121 | 0.863119  | -1.774736 | H                                                          | -1.888661 | 3.931603  | 3.955859   |
| H | -2.775074 | 0.951712  | -1.187832 | H                                                          | -0.577906 | 2.734793  | 3.799255   |
| H | -2.309139 | 1.716239  | -2.739986 | C                                                          | -2.273728 | 2.207859  | 3.682319   |
| C | -3.885300 | -0.368296 | -3.461327 | H                                                          | -0.518755 | 4.433343  | 1.644190   |
| H | -4.136223 | -1.261799 | -4.065986 | H                                                          | -0.713742 | 5.310535  | 2.295960   |
| H | -3.982979 | 0.520220  | -4.117699 | H                                                          | -0.537337 | 4.770351  | 0.589109   |
| H | -4.646070 | -0.279764 | -2.663351 | H                                                          | 0.502064  | 4.066589  | 1.866364   |
| C | 1.103315  | 1.904593  | 1.351502  | C                                                          | -1.933771 | 3.930459  | -2.892789  |
| C | 2.041949  | 1.525137  | 2.351407  | H                                                          | -2.429981 | 4.324885  | -3.802555  |
| C | 3.251972  | 2.236177  | 2.442503  | H                                                          | -0.879704 | 4.270204  | -2.907235  |
| H | 3.978147  | 1.960272  | 3.222777  | H                                                          | -2.433490 | 4.400628  | -2.024964  |
| C | 3.554125  | 3.275511  | 1.553235  | C                                                          | -3.515683 | 1.973663  | -2.770972  |
| H | 4.508834  | 3.816011  | 1.635410  | H                                                          | -4.096472 | 2.385839  | -3.622345  |
| C | 2.642039  | 3.603312  | 0.541789  | H                                                          | -3.963431 | 2.347637  | -1.8229513 |
| H | 2.887905  | 4.405858  | -0.170708 | H                                                          | -3.627104 | 0.871641  | -2.784572  |
| C | 1.410296  | 2.936227  | 0.420599  | C                                                          | -1.513917 | 1.925347  | -4.273238  |
| C | 1.785442  | 0.338615  | 3.274414  | H                                                          | -2.069599 | 2.482716  | -5.054555  |
| H | 0.733887  | 0.021420  | 3.121021  | H                                                          | -1.672863 | 0.850482  | -4.458256  |
| C | 2.885695  | -0.842205 | 2.867847  | H                                                          | -0.437452 | 2.132672  | -4.413125  |
| H | 2.549949  | -1.087707 | 1.796626  | C                                                          | -0.281077 | 0.593508  | 2.586459   |
| H | 2.455621  | -1.744608 | 3.472010  | C                                                          | 0.918006  | 0.895602  | 3.294570   |
| H | 3.757829  | -0.597409 | 3.018336  | C                                                          | 1.067591  | 0.428099  | 4.612021   |
| C | 1.952181  | 0.680815  | 4.762548  | H                                                          | 1.984599  | 0.675187  | 5.168590   |
| H | 1.292703  | 1.517711  | 5.068048  | C                                                          | 0.079104  | -0.350801 | 5.224089   |
| H | 2.995269  | 0.971707  | 5.003725  | H                                                          | 0.204141  | -0.699826 | 6.260176   |
| H | 1.702995  | -0.196896 | 5.393405  | C                                                          | -1.052567 | -0.716739 | 4.485466   |
| C | 0.431422  | 3.337282  | -0.678830 | H                                                          | -1.811766 | -1.373812 | 4.939448   |
| H | -0.492358 | 2.744835  | -0.519878 | C                                                          | -1.253420 | -0.278692 | 3.161843   |
| C | 0.969522  | 2.980344  | -2.075299 | C                                                          | 2.043587  | 1.696277  | 2.653142   |
| H | 0.235099  | 3.257272  | -2.859739 | H                                                          | 1.643926  | 2.116378  | 1.706876   |
| H | 1.169952  | 1.896156  | -2.159955 | C                                                          | 2.519785  | 2.870836  | 3.522909   |
| H | 1.916039  | 3.517840  | -2.294085 | H                                                          | 1.683891  | 3.535072  | 3.820799   |
| C | 0.049199  | 4.825262  | -0.604537 | H                                                          | 3.264439  | 3.483303  | 2.974047   |
| H | -0.364517 | 5.096941  | 0.386927  | H                                                          | 3.011663  | 2.516054  | 4.451890   |
| H | -0.714228 | 5.068948  | -1.371429 | C                                                          | 3.217417  | 0.766006  | 2.296109   |
| H | 0.924564  | 5.481367  | -0.789642 | H                                                          | 2.877159  | -0.061591 | 1.644757   |
| N | 1.663811  | -0.268577 | -0.903759 | H                                                          | 3.651917  | 0.311422  | 3.210122   |
| C | 2.561028  | -0.407077 | -1.809405 | H                                                          | 4.023042  | 1.326376  | 1.777690   |
| C | 4.007046  | -0.484644 | -1.434022 | C                                                          | -2.500587 | -0.796448 | 2.438892   |
| C | 4.929625  | -1.249483 | -2.181557 | H                                                          | -2.900274 | -1.580274 | 3.117882   |
| H | 4.587483  | -1.783512 | -3.080854 | C                                                          | -2.211538 | -1.500981 | 1.105768   |
| C | 6.267276  | -1.346974 | -1.770957 | H                                                          | -1.394623 | -2.241012 | 1.198313   |
| H | 6.974023  | -1.955895 | -2.355782 | H                                                          | -1.938164 | -0.774170 | 0.310454   |
| C | 6.704031  | -0.672083 | -0.619081 | H                                                          | -3.118566 | -2.030533 | 0.748703   |
| H | 7.756539  | -0.742408 | -0.304248 | C                                                          | -3.626335 | 0.237734  | 2.269736   |
| C | 5.791525  | 0.095285  | 0.126282  | H                                                          | -3.884178 | 0.728380  | 3.229397   |
| H | 6.125184  | 0.636609  | 1.025424  | H                                                          | -4.542559 | -0.258897 | 1.888162   |

|   |           |           |           |   |           |           |           |
|---|-----------|-----------|-----------|---|-----------|-----------|-----------|
| H | -3.348218 | 1.020471  | 1.537665  | H | 1.360899  | -3.720277 | -2.962701 |
| C | 0.093348  | 0.037725  | -2.802129 | C | 1.696691  | 2.951401  | -3.600047 |
| C | -0.585155 | -1.067266 | -3.400963 | H | 1.840722  | 3.880657  | -4.189039 |
| C | 0.007402  | -1.708661 | -4.500362 | H | 1.902057  | 2.091018  | -4.265227 |
| H | -0.517172 | -2.551328 | -4.975686 | H | 2.457448  | 2.938883  | -2.793561 |
| C | 1.254336  | -1.306599 | -4.994497 | C | 0.076677  | 4.244361  | -2.238121 |
| H | 1.697888  | -1.812940 | -5.865097 | H | 0.251244  | 5.075836  | -2.951763 |
| C | 1.949128  | -0.276657 | -4.347273 | H | 0.784241  | 4.369856  | -1.401352 |
| H | 2.950892  | 0.014690  | -4.701782 | H | -0.941299 | 4.362658  | -1.828149 |
| C | 1.403485  | 0.403070  | -3.242750 | C | -0.786575 | -2.918914 | -4.137252 |
| C | -1.906324 | -1.579560 | -2.842350 | H | -0.709610 | 3.861057  | -4.717823 |
| H | -2.288664 | -0.807103 | -2.143879 | H | -1.811964 | 2.861813  | -3.719360 |
| C | -2.973963 | -1.802825 | -3.924315 | H | -0.666253 | 2.078706  | -4.847314 |
| H | -3.135675 | -0.894197 | -4.538600 | C | 0.419166  | -2.608659 | -0.792242 |
| H | -3.942469 | -2.078727 | -3.459679 | C | 1.762406  | -3.026629 | -0.541663 |
| H | -2.695112 | -2.628341 | -4.611012 | C | 1.967516  | -4.250954 | 0.114010  |
| C | -1.666368 | -2.860020 | -2.022994 | H | 2.996221  | -4.594855 | 0.297585  |
| H | -0.936015 | -2.676567 | -1.212255 | C | 0.889080  | -5.033717 | 0.554010  |
| H | -1.253988 | -3.671742 | -2.656575 | H | 1.072759  | -5.988738 | 1.068172  |
| H | -2.611139 | -3.219164 | -1.566408 | C | -0.421970 | -4.586610 | 0.347622  |
| C | 2.272129  | 1.456632  | -2.555415 | H | -1.265826 | -5.192723 | 0.711358  |
| H | 3.242648  | 1.411191  | -3.095146 | C | -0.685212 | -3.380256 | -0.325158 |
| C | 2.590375  | 1.113426  | -1.091833 | C | 2.931372  | -2.118929 | -0.905034 |
| H | 3.412975  | 1.748078  | -0.703357 | H | 2.592071  | -1.443244 | -1.715886 |
| H | 2.895502  | 0.057355  | -0.960304 | C | 3.289784  | -1.229399 | 0.296988  |
| H | 1.727428  | 1.340789  | -0.414390 | H | 2.398687  | -0.684074 | 0.678663  |
| C | 1.770934  | 2.905167  | -2.679098 | H | 4.056033  | -0.472439 | 0.016345  |
| H | 1.542190  | 3.169463  | -3.730525 | H | 3.685039  | -1.828444 | -1.138653 |
| H | 2.549463  | 3.607988  | -2.316880 | C | 4.159754  | -2.876078 | -1.424130 |
| H | 0.863239  | 3.075979  | -2.068767 | H | 3.903595  | -3.538687 | -2.275982 |
| N | 1.123954  | -1.546218 | 0.582389  | H | 4.623841  | -3.504018 | -0.635838 |
| C | 1.653619  | -2.711635 | 0.655124  | H | 4.936164  | -2.162004 | -1.765639 |
| C | 1.602319  | -3.684789 | -0.487707 | C | -2.121481 | -2.918878 | -0.549888 |
| C | 1.251592  | -5.034912 | -0.262407 | H | -2.071898 | -1.979242 | -1.142005 |
| H | 1.045437  | -5.371994 | 0.764909  | C | -2.824631 | -2.595804 | 0.780435  |
| C | 1.153302  | -5.936587 | -1.331643 | H | -2.270723 | -1.825239 | 1.353795  |
| H | 0.861742  | -6.981227 | -1.142027 | H | -2.909608 | -3.497791 | 1.420826  |
| C | 1.435801  | -5.507240 | -2.641570 | H | -3.848820 | -2.211312 | 0.598728  |
| H | 1.376707  | -6.217407 | -3.480601 | C | -2.930157 | -3.936103 | -1.372517 |
| C | 1.795349  | -4.169899 | -2.872056 | H | -2.449769 | -4.150583 | -2.348328 |
| H | 2.019245  | -3.822718 | -3.890883 | H | -3.952496 | -3.554319 | -1.571104 |
| C | 1.861719  | -3.260573 | -1.807123 | H | -3.032397 | -4.900132 | -0.833102 |
| H | 2.117979  | -2.207549 | -1.998166 | C | -0.404328 | -2.576848 | 0.014640  |
| C | 2.346316  | -3.143841 | 1.911632  | C | -1.755828 | 3.007908  | 0.138583  |
| C | 1.941693  | -2.593223 | 3.146587  | C | -2.049700 | 4.041382  | 1.044714  |
| H | 1.097746  | -1.890448 | 3.156316  | H | -3.088611 | 4.391726  | 1.142864  |
| C | 2.600810  | -2.941263 | 4.330932  | C | -1.047926 | 4.621576  | 1.835116  |
| H | 2.263166  | -2.505288 | 5.283676  | H | -1.296069 | 5.430961  | 2.537362  |
| C | 3.681088  | -3.840202 | 4.302009  | C | 0.267081  | 4.149397  | 1.739859  |
| H | 4.200657  | -4.113034 | 5.233475  | H | 1.048758  | 4.589037  | 2.378658  |
| C | 4.093212  | -4.392012 | 3.077837  | C | 0.614030  | 3.123925  | 0.842301  |
| H | 4.942129  | -5.092422 | 3.046407  | C | -2.871830 | 2.323759  | -0.643422 |
| C | 3.428129  | -4.052155 | 1.890699  | H | -2.398786 | 1.755798  | -1.470354 |
| H | 3.757225  | -4.482350 | 0.932852  | C | -3.583949 | 1.298441  | 0.259111  |

Conformation 28.

Multiplicity: 4

Charge: 0

E(B97-3c) = -3413.540469089547 Hartree

E(M06/def2-TZVP) = -3413.227428110345 Hartree

E(PBE - D3(BJ)/def2-TZVP) = -3412.100688568439 Hartree

E(PBE0 - D3(BJ)/def2-TZVP) = -3412.315721314877 Hartree

E(PBEh-3c) = -3408.881497774843 Hartree

E(PM6) = 94.93429 Kcal/mol

E(PM7) = 109.90711 Kcal/mol

E( $\omega$ B97X-V/def2-TZVP) = -3415.600531592023 Hartree

E(GFN1-xTB) = -148.540569864825 Hartree

E(GFN2-xTB) = -147.319931789785 Hartree

E(GFN-FF) = -20.504681129888 Hartree

Coordinates:

|    |           |           |           |   |           |           |          |
|----|-----------|-----------|-----------|---|-----------|-----------|----------|
| Co | -0.243746 | -0.214629 | 0.088515  | H | 3.047886  | 4.565225  | 1.093614 |
| N  | 0.182779  | -1.344777 | -1.387044 | C | -0.403733 | -0.283831 | 3.111920 |
| N  | -0.102051 | 1.501159  | -0.863815 | C | 0.667363  | -1.132134 | 3.727495 |
| C  | 0.443793  | -1.917764 | -3.879222 | C | 1.158764  | -2.253457 | 3.025794 |
| C  | 0.317346  | -0.949778 | -2.661128 | H | 0.716260  | -2.511173 | 2.052986 |
| C  | 0.290029  | 0.425021  | -2.985848 | C | 2.186682  | -3.036331 | 3.566228 |
| H  | 0.420767  | 0.632785  | -4.050013 | H | 2.543478  | -3.916236 | 3.009961 |
| C  | 0.130700  | 1.585747  | -2.183786 | C | 2.752565  | -2.702045 | 4.808005 |
| C  | 0.267475  | 2.919210  | -3.001755 | H | 3.560915  | -3.317314 | 5.232757 |
| C  | -0.793753 | -1.684454 | -4.781708 | C | 2.278849  | -1.580368 | 5.508834 |
| H  | -0.751095 | -2.359380 | -5.661451 | H | 2.724915  | -1.306329 | 6.477404 |
| H  | -0.856907 | -0.643712 | -5.152600 | C | 1.237112  | -0.805834 | 4.978842 |
| H  | -1.729445 | -1.903195 | -4.227890 | H | 0.866635  | 0.071840  | 5.529870 |
| C  | 1.733458  | -1.597556 | -4.668887 | C | -1.465792 | 0.291448  | 3.996047 |
| H  | 1.813926  | -2.275457 | -5.543292 | C | -1.942818 | -0.398202 | 5.132383 |
| H  | 2.633206  | -1.748924 | -4.039003 | H | -1.497844 | -1.367345 | 5.404109 |
| H  | 1.754359  | -0.557590 | -5.047191 | C | -2.989465 | 0.135915  | 5.898486 |
| C  | 0.471606  | -3.420354 | -3.544988 | H | -3.359451 | -0.416388 | 6.775989 |
| H  | 0.490531  | -3.983988 | -4.500005 | C | -3.563548 | 1.369409  | 5.549760 |
| H  | -0.421459 | -3.747524 | -2.982988 | H | -4.379981 | 1.788959  | 6.157836 |

C -3.084741 2.066518 4.426387  
H -3.516243 3.042090 4.153346  
C -2.050330 1.529403 3.651676  
H -1.668780 2.063266 2.770903

Conformation 29.  
Multiplicity: 4  
Charge: 0  
E(B97-3c) = -3413.522536342741 Hartree  
E(M06/def2-TZVP) = -3413.210624300072 Hartree  
E(PBE - D3(BJ)/def2-TZVP) = -3412.084408221077 Hartree  
E(PBE0 - D3(BJ)/def2-TZVP) = -3412.299522016722 Hartree  
E(PBEh-3c) = -3408.858963670647 Hartree  
E(PM6) = 109.03085 Kcal/mol  
E(PM7) = 117.05991 Kcal/mol  
E( $\omega$ B97X-V/def2-TZVP) = -3415.577131082867 Hartree  
E(GFN1-xTB) = -148.524678972839 Hartree  
E(GFN2-xTB) = -147.301010405657 Hartree  
E(GFN-FF) = -20.489309074126 Hartree

Coordinates:  
Co 0.468167 0.107570 0.035649  
N 0.026595 -0.762849 -1.689490  
N 0.086625 -1.385977 1.185640  
C -0.636223 -2.846635 -3.118885  
C -0.333602 -2.051623 -1.785425  
C -0.470167 -2.861009 -0.624192  
H -0.760389 -3.891447 -0.839979  
C -0.301665 -2.600171 0.754200  
C -0.531859 -3.848046 1.672917  
C -0.431797 -2.087229 -4.443602  
H -0.651248 -2.786724 -5.276446  
H 0.601474 -1.721702 -4.576691  
H -1.106611 -1.220233 -4.549121  
C 0.273158 -4.103463 -3.179782  
H 0.073699 -4.650203 -4.124102  
H 0.089801 -4.807803 -2.346591  
H 1.344797 -3.834502 -3.167310  
C -2.105872 -3.340257 -3.109518  
H -2.263052 -4.035814 -3.959277  
H -2.818275 -2.502973 -3.236351  
H -2.371630 -3.874399 -2.177233  
C 0.488586 -4.934952 1.245888  
H 0.365083 -5.834911 1.883016  
H 1.527745 -4.567843 1.370981  
H 0.367074 -5.246846 0.191270  
C -1.971910 -4.375952 1.470466  
H -2.137223 -5.269695 2.106732  
H -2.175984 -4.666227 0.421977  
H -2.719142 -3.610591 1.760090  
C -0.329576 -3.639053 3.185700  
H -0.451638 -4.621291 3.686402  
H -1.061488 -2.942777 3.630111  
H 0.679733 -3.263393 3.431721  
C 0.188994 0.152333 -2.759797  
C 1.502745 0.368276 -3.284171  
C 1.649833 1.198123 -4.409433  
H 2.657969 1.341430 -4.830228  
C 0.552253 1.846017 -4.990401  
H 0.680785 2.471147 -5.886515  
C -0.699025 1.728756 -4.380242  
H -1.555117 2.289439 -4.789033  
C -0.911465 0.922217 -3.241669  
C 2.782859 -0.213551 -2.676614  
H 3.599302 0.286233 -3.241539  
C 3.009268 0.170489 -1.207300  
H 2.807746 1.240545 -1.017928  
H 4.051911 -0.053544 -0.901378  
H 2.379282 -0.454983 -0.521176  
C 2.983153 -1.723795 -2.869026  
H 2.821437 -2.030876 -3.921176  
H 2.295206 -2.304053 -2.224906  
H 4.018326 -2.009863 -2.589359  
C -2.306428 1.054270 -2.608167  
H -3.011684 1.067761 -3.470265  
C -2.422033 2.432317 -1.919135  
H -2.113270 3.258857 -2.588516  
H -1.776081 2.467191 -1.021778  
H -3.467728 2.616892 -1.597787  
C -2.809613 -0.026737 -1.645987  
H -2.828418 -1.031718 -2.098773  
H -3.845041 0.220819 -1.335299  
H -2.190171 -0.088519 -0.733379  
C 0.099619 -0.893696 2.518761  
C 1.342278 -0.712446 3.191840  
C 1.334192 -0.198746 4.501036  
H 2.289343 -0.068271 5.033183  
C 0.135257 0.135887 5.142257  
H 0.146516 0.518384 6.174207  
C -1.077151 0.002782 4.451315  
H -2.014896 0.306233 4.940689

C -1.122980 -0.491913 3.138431  
C 2.665351 -1.039816 2.511625  
H 2.420037 -1.510871 1.536983  
C 3.448297 0.254821 2.228737  
H 2.834905 0.970464 1.643999  
H 4.375557 0.047377 1.656536  
H 3.739295 0.759159 3.173391  
C 3.511243 -2.046505 3.306530  
H 2.958986 -2.991788 3.481351  
H 3.806273 -1.642131 4.296767  
H 4.443334 -2.293341 2.757891  
C -2.444515 -0.523193 2.379217  
H -2.305682 -1.174881 1.493354  
C -2.771795 0.890530 1.863291  
H -3.692507 0.885696 1.245623  
H -1.941554 1.287662 1.246273  
H -2.917952 1.596676 2.706300  
C -3.607210 -1.103058 3.197015  
H -3.367239 -2.108008 3.599887  
H -4.512823 -1.195945 2.563552  
H -3.877076 -0.453356 4.055147  
N 0.487904 1.896371 -0.048887  
C 0.417677 3.140020 0.251440  
C -0.291697 3.606056 1.491077  
C -0.038327 2.995316 2.736094  
H 0.710190 2.191511 2.803306  
C -0.734107 3.406864 3.881368  
H -0.511518 2.930075 4.846801  
C -1.715517 4.407358 3.793395  
H -2.267140 4.721871 4.692625  
C -1.990431 5.003696 2.552415  
H -2.765782 5.783342 2.473429  
C -1.273149 4.618764 1.411781  
H -1.479470 5.093657 0.440432  
C 1.014085 4.171748 -0.656052  
H 1.238451 3.847008 -2.012498  
C 0.936119 2.854045 -2.371320  
C 1.821917 4.775447 -2.881005  
H 1.975312 4.502977 -3.936720  
C 2.200023 6.049462 -2.409430  
H 2.658994 6.776577 -3.092134  
C 1.986363 6.376533 -1.061550  
H 2.285704 7.286278 -0.683371  
C 1.394384 5.450033 -0.190196  
H 1.234737 5.713327 0.866018

Conformation 6.  
Multiplicity: 4  
Charge: 0  
E(B97-3c) = -3413.532685288374 Hartree  
E(M06/def2-TZVP) = -3413.222124048085 Hartree  
E(PBE - D3(BJ)/def2-TZVP) = -3412.094209379966 Hartree  
E(PBE0 - D3(BJ)/def2-TZVP) = -3412.308342631976 Hartree  
E(PBEh-3c) = -3408.870757868448 Hartree  
E(PM6) = 99.67616 Kcal/mol  
E(PM7) = 114.02554 Kcal/mol  
E( $\omega$ B97X-V/def2-TZVP) = -3415.589059046359 Hartree  
E(GFN1-xTB) = -148.535057129350 Hartree  
E(GFN2-xTB) = -147.313145160225 Hartree  
E(GFN-FF) = -20.500698107896 Hartree

Coordinates:  
Co 0.007013 0.251105 -0.055104  
N 0.505242 -1.536927 -0.711237  
N 1.148615 0.291787 1.474187  
C 2.079556 -3.670236 -0.718265  
C 1.524447 -2.236812 -0.179045  
C 2.239800 -1.764932 0.952926  
H 3.067312 -2.410069 1.256747  
C 2.118988 -0.592049 1.735336  
C 3.226605 -0.405489 2.821053  
C 1.309237 -4.274197 -1.875518  
H 1.792597 -5.249953 -2.087189  
H 1.326397 -3.682998 -2.807119  
H 0.251761 -4.471800 -1.627088  
C 3.530416 -3.379141 -1.210577  
H 3.955323 -4.335613 -1.579214  
H 4.194023 -2.999984 -0.409641  
H 3.559861 -2.652343 -2.045039  
C 2.099873 -4.635825 0.442524  
H 2.467469 -5.611194 0.063412  
H 1.085428 -4.791730 0.858400  
H 2.760803 -4.335004 1.277074  
C 4.586390 -0.327961 2.080833  
H 5.406891 -0.173310 2.811580  
H 4.596865 0.521299 1.368017  
H 4.808001 -1.248225 1.507383  
C 3.225329 -1.617816 3.780913  
H 4.024682 -1.496022 4.540571  
H 3.402457 -2.577472 3.258852  
H 2.258668 -1.698626 4.318183

|   |           |           |           |                                                            |
|---|-----------|-----------|-----------|------------------------------------------------------------|
| C | 3.112723  | 0.862827  | 3.687164  | Multiplicity: 5                                            |
| H | 4.000929  | 0.909359  | 4.349620  | Charge: 0                                                  |
| H | 2.216826  | 0.863255  | 4.333097  | E(B97-3c) = -5596.386662097501 Hartree                     |
| H | 3.093442  | 1.792277  | 3.090028  | E(M06/def2-TZVP) = -5596.635267331795 Hartree              |
| C | -0.165167 | -1.823712 | -1.933732 | E(PBE - D3(BJ)/def2-TZVP) = -5594.599066129174 Hartree     |
| C | 0.430437  | -1.365440 | -3.149399 | E(PBE0 - D3(BJ)/def2-TZVP) = -5594.995838439150 Hartree    |
| C | -0.222175 | -1.618923 | -4.367571 | E(PBEh-3c) = -5589.624015247439 Hartree                    |
| H | 0.239005  | -1.275952 | -5.306190 | E(PM6) = -2.72851 Kcal/mol                                 |
| C | -1.448827 | -2.293317 | -4.404169 | E(PM7) = 107.91092 Kcal/mol                                |
| H | -1.946761 | -2.495580 | -5.364238 | E( $\omega$ B97X-V/def2-TZVP) = -5597.233921337914 Hartree |
| C | -2.045017 | -2.687732 | -3.202115 | E(GFN1-xTB) = -152.461249225203 Hartree                    |
| H | -3.022168 | -3.196771 | -3.222591 | E(GFN2-xTB) = -152.110505793784 Hartree                    |
| C | -1.440551 | -2.459028 | -1.948853 | E(GFN-FF) = -19.124830578190 Hartree                       |
| C | 1.720999  | -0.551122 | -3.142352 |                                                            |
| H | 2.197725  | -0.685904 | -2.150647 | Coordinates:                                               |
| C | 2.731157  | -1.005882 | -4.206362 | Cr 0.291712 -0.318149 -0.695226                            |
| H | 2.938293  | -2.093142 | -4.141014 | Al -1.281855 4.319588 0.898640                             |
| H | 3.691924  | -0.465154 | -4.084234 | Cl 1.864300 -0.598462 -2.344844                            |
| H | 2.369887  | -0.796927 | -5.234363 | Cl -1.083540 4.500465 3.083910                             |
| C | 1.401059  | 0.949056  | -3.290636 | Cl 0.207347 5.573835 -0.059247                             |
| H | 0.660053  | 1.274317  | -2.532238 | N -2.364441 -1.910997 -0.356539                            |
| H | 0.961842  | 1.164507  | -4.286862 | H -3.165912 -2.546264 -0.336617                            |
| H | 2.318600  | 1.564045  | -3.178659 | N -1.496735 0.192913 0.235627                              |
| C | -2.272358 | -2.858550 | -0.724001 | N -0.748368 2.446158 0.542139                              |
| C | -2.942617 | -3.665145 | -1.095357 | P -1.052148 -2.118690 -1.468742                            |
| C | -3.181990 | -1.692751 | -0.292988 | P 0.545103 2.015747 -0.522931                              |
| H | -3.769460 | -1.298351 | -1.145410 | P 1.533467 -1.234139 1.320476                              |
| H | -2.575774 | -0.853878 | 0.098489  | C -2.498111 -0.733003 0.367642                             |
| H | -3.886293 | -2.014756 | 0.501416  | C -3.600532 -0.529492 1.212003                             |
| C | -1.538251 | -3.439846 | 0.492045  | H -4.383993 -1.294981 1.292187                             |
| H | -0.869825 | -4.276483 | 0.211905  | C -3.634860 0.651449 1.969255                              |
| H | -2.281589 | -3.835002 | 1.214504  | H -4.451562 0.816661 2.687915                              |
| H | -0.932177 | -2.678929 | 1.017443  | C -2.652041 1.625604 1.812704                              |
| C | 0.723738  | 1.446129  | 2.172981  | H -2.656872 2.547420 2.409486                              |
| C | 0.955264  | 2.729293  | 1.590717  | C -1.615251 1.428376 0.860846                              |
| C | 0.458567  | 3.865367  | 2.254737  | C -0.584736 -3.867759 -1.266398                            |
| H | 0.640129  | 4.861267  | 1.822944  | C -0.823394 -4.562137 -0.063397                            |
| C | -0.261978 | 3.752112  | 3.449933  | H -1.384179 -4.080913 0.751466                             |
| H | -0.635310 | 4.653802  | 3.957892  | C -0.317553 -5.859983 0.104269                             |
| C | -0.529010 | 2.481422  | 3.982676  | H -0.508276 -6.394227 1.046905                             |
| H | -1.124021 | 2.396231  | 4.903932  | C 0.438403 -6.462462 -0.913461                             |
| C | -0.066134 | 1.313661  | 3.356718  | H 0.838733 -7.478215 -0.775320                             |
| C | 1.730686  | 2.879647  | 0.285226  | C 0.688252 -5.765345 -2.107973                             |
| H | 1.825991  | 1.858657  | -0.156294 | H 1.286529 -6.231342 -2.905341                             |
| C | 0.989838  | 3.754470  | -0.737208 | C 0.181005 -4.472029 -2.287988                             |
| H | -0.025889 | 3.360041  | -0.936126 | H 0.389509 -3.920219 -3.217624                             |
| H | 1.540004  | 3.774444  | -1.699417 | C -1.760213 -2.005242 -3.154513                            |
| H | 0.893954  | 4.802877  | -0.388043 | C -1.468553 -0.844624 -3.899986                            |
| C | 3.159883  | 3.532207  | 0.532244  | H -0.765369 -0.099099 -3.494275                            |
| H | 3.722607  | 2.726056  | 1.215808  | C -2.054885 -0.659809 -5.160942                            |
| H | 3.140324  | 4.403010  | 0.990361  | H -1.821666 0.247594 -5.738488                             |
| H | 3.724491  | 3.461231  | -0.420236 | C -2.927841 -1.629567 -5.678552                            |
| C | -0.455647 | -0.068770 | 3.865886  | H -3.387825 -1.483878 -6.667886                            |
| H | 0.346968  | -0.771939 | 3.564634  | C -3.210796 -2.793171 -4.941201                            |
| C | -1.743197 | -0.533729 | 3.160311  | H -3.888832 -3.555939 -5.353411                            |
| H | -1.980612 | -1.587091 | 3.413789  | C -2.626188 -2.986030 -3.681773                            |
| H | -1.642606 | -0.461159 | 2.058795  | H -2.835455 -3.904647 -3.110411                            |
| H | -2.605880 | 0.100694  | 3.448165  | C 2.138783 2.578138 0.155613                               |
| C | -0.592388 | -0.155360 | 5.390300  | C 2.253607 3.342143 1.331899                               |
| H | 0.320960  | 0.204799  | 5.906443  | H 1.360298 3.666798 1.882358                               |
| H | -0.770739 | -1.204713 | 5.700683  | C 3.526192 3.677768 1.814679                               |
| H | -1.450150 | 0.441247  | 5.763658  | H 3.608693 4.274108 2.735169                               |
| N | -1.373514 | 0.992668  | -0.903941 | C 4.680879 3.259854 1.135667                               |
| C | -2.450155 | 1.643992  | -1.150019 | H 5.675498 3.533449 1.520069                               |
| C | -3.415855 | 1.982501  | -0.054999 | C 4.566132 2.480710 -0.026924                              |
| C | -2.930366 | 2.346612  | 1.218987  | H 5.467693 2.136344 -0.556394                              |
| H | -1.845470 | 2.427663  | 1.375856  | C 3.299532 2.128226 -0.514673                              |
| C | -3.817865 | 2.613797  | 2.269205  | H 3.203820 1.481235 -1.401485                              |
| H | -3.417024 | 2.914188  | 3.249151  | C 0.229737 2.887260 -2.100358                              |
| C | -5.204068 | 2.501860  | 2.070251  | C 1.193807 3.663869 -2.766488                              |
| H | -5.901066 | 2.706837  | 2.897298  | H 2.170448 3.847482 -2.296086                              |
| C | -5.697385 | 2.130286  | 0.808529  | C 0.891979 4.226375 -4.014989                              |
| H | -6.782024 | 2.032656  | 0.646958  | H 1.645853 4.840800 -4.529971                              |
| C | -4.811734 | 1.883145  | -0.249990 | C -0.369059 4.025469 -4.598528                             |
| H | -5.200361 | 1.592488  | -1.237685 | H -0.602782 4.476780 -5.574735                             |
| C | -2.769244 | 2.053012  | -2.554081 | C -1.335676 3.255309 -3.930239                             |
| C | -3.488974 | 3.232726  | -2.845991 | H -2.330208 3.102157 -4.376603                             |
| H | -3.855044 | 3.863305  | -2.021760 | C -1.036153 2.679966 -2.687923                             |
| C | -3.721246 | 3.611529  | -4.176583 | H -1.791378 2.070205 -2.167091                             |
| H | -4.273512 | 4.539415  | -4.391441 | C -3.095137 4.652149 0.187094                              |
| C | -3.250539 | 2.813079  | -5.231801 | H -3.036711 4.467243 -0.910833                             |
| H | -3.440832 | 3.108673  | -6.275051 | H -3.824933 3.908143 0.575501                              |
| C | -2.538918 | 1.634061  | -4.948440 | C -3.593614 6.081255 0.454705                              |
| H | -2.174268 | 0.995066  | -5.767860 | H -4.591524 6.287302 0.007750                              |
| C | -2.295068 | 1.260161  | -3.622280 | H -2.889820 6.836095 0.044492                              |
| H | -1.739261 | 0.341545  | -3.390509 | H -3.676018 6.283993 1.543792                              |
|   |           |           |           | C 2.006283 -0.000015 2.610672                              |
|   |           |           |           | C 3.328510 0.159596 3.070931                               |
|   |           |           |           | H 4.146712 -0.442104 2.651196                              |
|   |           |           |           | C 3.617181 1.095785 4.076334                               |
|   |           |           |           | H 4.655060 1.211416 4.424188                               |

**ROBHUN**

Conformation 10.

|   |           |           |           |   |           |           |           |
|---|-----------|-----------|-----------|---|-----------|-----------|-----------|
| C | 2.597002  | 1.884375  | 4.628465  | H | -4.669184 | 1.202307  | -3.347990 |
| H | 2.830289  | 2.622414  | 5.410780  | C | -3.356632 | 0.148910  | -1.987675 |
| C | 1.281543  | 1.749591  | 4.157882  | H | -3.625401 | 0.784444  | -1.130360 |
| H | 0.478086  | 2.399774  | 4.534188  | C | -1.804390 | -2.948697 | 0.230575  |
| C | 0.990903  | 0.816206  | 3.154955  | C | -2.614707 | -3.875453 | -0.451376 |
| H | -0.042011 | 0.743068  | 2.786887  | H | -3.188841 | -3.558920 | -1.332642 |
| C | 0.620775  | -2.474009 | 2.345870  | C | -2.711213 | -5.193879 | 0.017912  |
| C | 1.176734  | -3.706176 | 2.745997  | H | -3.350128 | -5.914305 | -0.515066 |
| H | 2.210294  | -3.965839 | 2.477963  | C | -2.016239 | -5.591252 | 1.171020  |
| C | 0.417541  | -4.620700 | 3.492965  | H | -2.102699 | -6.625524 | 1.537448  |
| H | 0.867203  | -5.579147 | 3.794892  | C | -1.218268 | -4.664635 | 1.862550  |
| C | -0.903317 | -4.317070 | 3.858205  | H | -0.679111 | -4.965521 | 2.773778  |
| H | -1.495551 | -5.036907 | 4.443280  | C | -1.107559 | -3.349837 | 1.390653  |
| C | -1.458249 | -3.082439 | 3.482210  | H | -0.477654 | -2.623221 | 1.927870  |
| H | -2.488045 | -2.822068 | 3.771160  | C | -4.266559 | -1.153076 | 3.377356  |
| C | -0.703801 | -2.171622 | 2.730557  | H | -3.389011 | -0.805424 | 3.967420  |
| H | -1.155221 | -1.212707 | 2.443645  | H | -5.148954 | -0.680962 | 3.866364  |
| C | 3.116448  | -2.076063 | 0.857735  | C | -4.377314 | -2.684916 | 3.451976  |
| H | 3.738233  | -1.265957 | 0.421230  | H | -4.479652 | -3.058172 | 4.495178  |
| H | 3.630034  | -2.426645 | 1.778220  | H | -3.486092 | -3.184260 | 3.016090  |
| C | 2.926841  | -3.199948 | -0.165883 | H | -5.250276 | -3.058098 | 2.877950  |
| H | 3.900848  | -3.679984 | -0.389681 | C | -0.345715 | -2.155200 | -2.888147 |
| H | 2.522777  | -2.789349 | -1.110991 | C | -0.299641 | 1.097543  | -3.820203 |
| H | 2.234580  | -3.989146 | 0.188292  | H | 0.191126  | 0.150078  | -3.545177 |

Conformation 12.

Multiplicity: 5

Charge: 0

E(B97-3c) = -5596.388741295847 Hartree

E(M06/def2-TZVP) = -5596.637594551751 Hartree

E(PBE - D3(BJ)/def2-TZVP) = -5594.601050021001 Hartree

E(PBE0 - D3(BJ)/def2-TZVP) = -5594.997897810705 Hartree

E(PBEh-3c) = -5589.628078717655 Hartree

E(PM6) = -6.68397 Kcal/mol

E(PM7) = 98.27049 Kcal/mol

E( $\omega$ B97X-V/def2-TZVP) = -5597.236224588247 Hartree

E(GFN1-xTB) = -152.466692943338 Hartree

E(GFN2-xTB) = -152.117532403262 Hartree

E(GFN-FF) = -19.125123480387 Hartree

Coordinates:

|    |           |           |           |
|----|-----------|-----------|-----------|
| Cr | 0.656844  | -0.379961 | -0.274018 |
| Al | -4.161846 | -0.434672 | 1.533698  |
| Cl | 1.473327  | -1.631865 | -2.018105 |
| Cl | -4.957010 | 1.599257  | 1.255293  |
| Cl | -5.121756 | -1.747188 | 0.091895  |
| N  | 2.217869  | 0.604282  | 2.237960  |
| H  | 2.839195  | 0.806981  | 3.025369  |
| N  | -0.020489 | 0.314123  | 1.563266  |
| N  | -2.271542 | -0.233928 | 0.970368  |
| P  | 2.717882  | -0.398610 | 0.919351  |
| P  | -1.555925 | -1.202514 | -0.274614 |
| P  | 0.541348  | 1.924465  | -1.295092 |
| C  | 0.860636  | 0.832612  | 2.472878  |
| C  | 0.444902  | 1.568158  | 3.589012  |
| H  | 1.184771  | 1.975574  | 4.291100  |
| C  | -0.931520 | 1.792032  | 3.747771  |
| H  | -1.293638 | 2.407404  | 4.584625  |
| C  | -1.845276 | 1.236667  | 2.860118  |
| H  | -2.920481 | 1.429788  | 2.961517  |
| C  | -1.384078 | 0.436500  | 1.781142  |
| C  | 4.283115  | 0.368345  | 0.377549  |
| C  | 4.701681  | 1.644539  | 0.803723  |
| H  | 4.097823  | 2.203652  | 1.534536  |
| C  | 5.878472  | 2.206362  | 0.283625  |
| H  | 6.204197  | 3.200920  | 0.624154  |
| C  | 6.634226  | 1.505113  | -0.668785 |
| H  | 7.554478  | 1.949305  | -1.077036 |
| C  | 6.211034  | 0.237676  | -1.104810 |
| H  | 6.794802  | -0.310232 | -1.859659 |
| C  | 5.039893  | -0.330897 | -0.588254 |
| H  | 4.696043  | -1.314461 | -0.945381 |
| C  | 3.251791  | -2.012092 | 1.613446  |
| C  | 4.349800  | -2.133271 | 2.490442  |
| H  | 4.972214  | -1.254280 | 2.723884  |
| C  | 4.654758  | -3.379127 | 3.055536  |
| H  | 5.508267  | -3.475034 | 3.743814  |
| C  | 3.875621  | -4.506577 | 2.738703  |
| H  | 4.120268  | -5.482969 | 3.184060  |
| C  | 2.795618  | -4.391761 | 1.849800  |
| H  | 2.188789  | -5.272371 | 1.590099  |
| C  | 2.482287  | -3.146162 | 1.284671  |
| H  | 1.649408  | -3.047116 | 0.569508  |
| C  | -2.446392 | -0.914666 | -1.831447 |
| C  | -2.117095 | -1.729619 | -2.936492 |
| H  | -1.359300 | -2.520986 | -2.832695 |
| C  | -2.741750 | -4.172069 | -4.172069 |
| H  | -2.494278 | -2.159923 | -5.027055 |
| C  | -3.661818 | -0.462602 | -4.322812 |
| H  | -4.142442 | -0.287257 | -5.297149 |
| C  | -3.955337 | 0.373143  | -3.234576 |

Conformation 13.

Multiplicity: 5

Charge: 0

E(B97-3c) = -5596.381461906616 Hartree

E(M06/def2-TZVP) = -5596.630859369398 Hartree

E(PBE - D3(BJ)/def2-TZVP) = -5594.594213748065 Hartree

E(PBE0 - D3(BJ)/def2-TZVP) = -5594.990841260730 Hartree

E(PBEh-3c) = -5589.618818048475 Hartree

E(PM6) = 3.63514 Kcal/mol

E(PM7) = 116.33626 Kcal/mol

E( $\omega$ B97X-V/def2-TZVP) = -5597.229013990561 Hartree

E(GFN1-xTB) = -152.460005404970 Hartree

E(GFN2-xTB) = -152.111342636979 Hartree

E(GFN-FF) = -19.126197386254 Hartree

Coordinates:

|    |           |           |           |
|----|-----------|-----------|-----------|
| Cr | 0.250465  | -0.792403 | -0.175308 |
| Al | -4.125790 | 0.766571  | 2.101154  |
| Cl | 0.493616  | -2.700074 | -1.421508 |
| Cl | -5.360680 | -0.980705 | 1.721512  |
| Cl | -3.725832 | 0.990590  | 4.226497  |
| N  | 2.335674  | 0.857313  | 1.371403  |
| H  | 3.153909  | 1.377705  | 1.693786  |
| N  | 0.000391  | 0.736471  | 1.194524  |
| N  | -2.356262 | 0.339743  | 1.301324  |
| P  | 2.414746  | -0.795275 | 0.856479  |
| P  | -1.971231 | -1.172336 | 0.530152  |
| P  | 0.610465  | 0.755561  | -2.122015 |
| C  | 1.098554  | 1.449465  | 1.598135  |
| C  | 0.988567  | 2.694173  | 2.231142  |
| H  | 1.889703  | 3.249671  | 2.524133  |
| C  | -0.304174 | 3.167929  | 2.510163  |
| H  | -0.435378 | 4.141269  | 3.005806  |
| C  | -1.423870 | 2.401201  | 2.208271  |
| H  | -2.423247 | 2.746089  | 2.490157  |
| C  | -1.270167 | 1.144310  | 1.566235  |
| C  | 3.987028  | -0.961871 | -0.058967 |
| C  | 5.186723  | -0.369190 | 0.383052  |
| H  | 5.209825  | 0.236330  | 1.303052  |
| C  | 6.369530  | -0.561246 | -0.343107 |

|   |           |           |           |
|---|-----------|-----------|-----------|
| H | 7.303089  | -0.088180 | -0.002979 |
| C | 6.366015  | -1.368798 | -1.493524 |
| H | 7.300046  | -1.528122 | -2.053719 |
| C | 5.175980  | -1.973806 | -1.924567 |
| H | 5.171509  | -2.608044 | -2.824007 |
| C | 3.980905  | -1.763248 | -1.218672 |
| H | 3.032420  | -2.214367 | -1.557429 |
| C | 2.708221  | -1.750533 | -2.396819 |
| C | 2.269690  | -1.253785 | 3.642011  |
| H | 1.859444  | -0.235195 | 3.716915  |
| C | 2.349290  | -2.061675 | 4.786559  |
| H | 2.007299  | -1.666968 | 5.755223  |
| C | 2.857235  | -3.367659 | 4.695184  |
| H | 2.915329  | -4.000421 | 5.593588  |
| C | 3.288217  | -3.866218 | 3.453996  |
| H | 3.684688  | -4.890019 | 3.378255  |
| C | 3.213071  | -3.065132 | 2.306631  |
| H | 3.544706  | -3.462537 | 1.334637  |
| C | -3.141916 | -1.449789 | -0.833194 |
| C | -3.064733 | -2.683087 | -1.517286 |
| H | -2.377610 | -3.467040 | -1.166110 |
| C | -3.840189 | -2.894562 | -2.665920 |
| H | -3.777534 | -3.859269 | -3.191748 |
| C | -4.680937 | -1.879297 | -3.150454 |
| H | -5.284830 | -2.047595 | -4.055003 |
| C | -4.747728 | -0.648709 | -2.478064 |
| H | -5.406947 | 0.151180  | -2.847311 |
| C | -3.984238 | -0.433055 | -1.323221 |
| H | -4.051546 | 0.527458  | -0.794752 |
| C | -2.131729 | -2.535288 | 1.739490  |
| C | -1.065370 | -2.660881 | 2.655174  |
| H | -0.221317 | -1.954463 | 2.610370  |
| C | -1.066741 | -3.689581 | 3.604907  |
| H | -0.228119 | -3.774085 | 4.312416  |
| C | -2.126792 | -4.610824 | 3.631943  |
| H | -2.128642 | -5.426173 | 4.371516  |
| C | -3.183064 | -4.495259 | 2.713664  |
| H | -4.016188 | -5.213866 | 2.738561  |
| C | -3.194176 | -3.457783 | 1.769767  |
| H | -4.034576 | -3.348874 | 1.070985  |
| C | -5.023967 | 2.352115  | 1.299487  |
| H | -5.069743 | 2.235949  | 0.191175  |
| H | -6.077495 | 2.183965  | 1.623642  |
| C | -4.608021 | 3.782656  | 1.668784  |
| H | -5.339702 | 4.548640  | 1.328920  |
| H | -3.629768 | 4.062984  | 1.223423  |
| H | -4.505758 | 3.901369  | 2.768831  |
| C | -0.492392 | 2.218381  | -2.311518 |
| C | -1.687948 | 2.277959  | -1.572818 |
| H | -1.936889 | 1.470471  | -0.871950 |
| C | -2.566837 | 3.362002  | -1.728366 |
| H | -3.494463 | 3.398629  | -1.137788 |
| C | -2.253253 | 4.393686  | -2.624939 |
| H | -2.938647 | 5.246452  | -2.745007 |
| C | -1.060514 | 4.340328  | -3.367945 |
| H | -0.812457 | 5.149165  | -4.072236 |
| C | -0.181777 | 3.259635  | -3.212980 |
| H | 0.757209  | 3.227175  | -3.787420 |
| C | 2.277030  | 1.529945  | -2.136994 |
| C | 2.516839  | 2.644651  | -1.301413 |
| H | 1.686377  | 3.087352  | -0.729492 |
| C | 3.801191  | 3.194814  | -1.202683 |
| H | 3.970451  | 4.068334  | -0.553824 |
| C | 4.866868  | 2.640590  | -1.932774 |
| H | 5.876358  | 3.071521  | -1.853334 |
| C | 4.635336  | 1.538719  | -2.769094 |
| H | 5.462974  | 1.097239  | -3.343870 |
| C | 3.350150  | 0.984222  | -2.870760 |
| H | 3.189285  | 0.112761  | -3.521157 |
| C | 0.463127  | -0.105166 | -3.761541 |
| H | 0.850956  | 0.571094  | -4.552640 |
| H | 1.125176  | -0.993219 | -3.689796 |
| C | -0.975748 | -0.548591 | -4.028026 |
| H | -1.042725 | -1.074827 | -5.001145 |
| H | -1.673681 | 0.311795  | -4.056808 |
| H | -1.322347 | -1.248536 | -3.242667 |

| Coordinates: |           |           |
|--------------|-----------|-----------|
| Cr           | -0.607837 | 0.188841  |
| Al           | 4.408126  | 1.392755  |
| Cl           | -2.283937 | 1.457888  |
| Cl           | 5.175090  | 1.533398  |
| Cl           | 4.306360  | 3.393582  |
| N            | -0.394205 | -2.922169 |
| N            | -0.462643 | -3.941699 |
| H            | 1.032814  | -1.064697 |
| N            | 2.536289  | 0.790138  |
| P            | -1.607128 | -1.900671 |
| P            | 1.186570  | 1.659592  |
| P            | -1.033162 | 0.626000  |
| C            | 0.860815  | -2.415280 |
| C            | 1.879989  | -3.266856 |
| H            | 1.700606  | -4.347423 |
| C            | 3.097941  | -2.683943 |
| H            | 3.899738  | -3.310979 |
| C            | 3.304807  | -1.317720 |
| H            | 4.242185  | -0.841358 |
| C            | 2.283069  | -0.513135 |
| C            | -3.140036 | -2.634534 |
| C            | -3.142003 | -3.342756 |
| H            | -2.197459 | -3.499425 |
| C            | -4.345347 | -3.834020 |
| H            | -4.338459 | -4.385067 |
| C            | -5.553797 | -3.611003 |
| H            | -6.497530 | -3.995956 |
| C            | -5.558634 | -2.884242 |
| H            | -6.505208 | -2.698369 |
| C            | -4.358674 | -2.393171 |
| H            | -4.364548 | -1.822380 |
| C            | -1.668217 | -2.277363 |
| C            | -2.088087 | -3.527156 |
| H            | -2.481077 | -4.295067 |
| C            | -2.013995 | -3.785315 |
| H            | -2.338108 | -4.761094 |
| C            | -1.529561 | -2.798545 |
| H            | -1.474555 | -3.006167 |
| C            | -1.123985 | -1.549712 |
| H            | -0.750873 | -0.770386 |
| C            | -1.193144 | -1.286430 |
| H            | -0.890586 | -0.304007 |
| C            | 1.093714  | 3.265148  |
| C            | 1.969758  | 3.606219  |
| H            | 2.797015  | 2.936558  |
| C            | 1.777295  | 4.806084  |
| H            | 2.468414  | 5.069819  |
| C            | 0.721695  | 5.667888  |
| H            | 0.579443  | 6.610020  |
| C            | -0.155879 | 5.322477  |
| H            | -0.994597 | 5.985643  |
| C            | 0.017917  | 4.118628  |
| H            | -0.703093 | 3.819465  |
| C            | 1.528555  | 1.947500  |
| C            | 1.513425  | 3.212748  |
| H            | 1.368336  | 4.117101  |
| C            | 1.721730  | 3.318235  |
| H            | 1.716965  | 4.310854  |
| C            | 1.958406  | 2.170111  |
| H            | 2.130896  | 2.260943  |
| C            | 1.985792  | 0.906462  |
| H            | 2.183360  | 0.002809  |
| C            | 1.762593  | 0.792781  |
| H            | 1.778063  | -0.199054 |
| C            | 5.364906  | 0.144353  |
| H            | 4.793759  | 0.141146  |
| H            | 5.312052  | -0.899106 |
| C            | 6.825210  | 0.547165  |
| H            | 7.342290  | -0.125361 |
| H            | 6.891882  | 1.577342  |
| H            | 7.420780  | 0.539747  |
| C            | 0.343070  | -0.076947 |
| C            | 0.401034  | -1.466099 |
| H            | -0.441592 | -2.110949 |
| C            | 1.526116  | -2.028252 |
| H            | 1.555061  | -3.111440 |
| C            | 2.622086  | -1.220919 |
| H            | 3.514198  | -1.668274 |
| C            | 2.585581  | 0.154910  |
| H            | 3.454924  | 0.789887  |
| C            | 1.451061  | 0.725899  |
| H            | 1.446465  | 1.803648  |
| C            | -2.581171 | -0.124688 |
| C            | -3.709843 | -0.094637 |
| H            | -3.607468 | -0.813041 |
| C            | -4.951613 | -0.550921 |
| H            | -5.824924 | -0.519612 |
| C            | -5.073234 | -1.066661 |
| H            | -6.045943 | -1.437539 |

Conformation 14.

Multiplicity: 5

Charge: 0

E(B97-3c) = -5596.391804898873 Hartree

E(M06/def2-TZVP) = -5596.639195694533 Hartree

E(PBE - D3(BJ)/def2-TZVP) = -5594.603531118059 Hartree

E(PBE0 - D3(BJ)/def2-TZVP) = -5595.000697110750 Hartree

E(PBEh-3c) = -5589.630706915516 Hartree

E(PM6) = -6.75326 Kcal/mol

E(PM7) = 102.32169 Kcal/mol

E( $\omega$ B97X-V/def2-TZVP) = -5597.238714056441 Hartree

E(GFN1-xTB) = -152.466465307826 Hartree

E(GFN2-xTB) = -152.118048322471 Hartree

E(GFN-FF) = -19.123985372431 Hartree

|   |           |           |           |
|---|-----------|-----------|-----------|
| C | -3.950652 | -1.111736 | -4.446544 |
| H | -4.042694 | -1.511808 | -5.468125 |
| C | -2.710441 | -0.632252 | -3.997765 |
| H | -1.838488 | -0.651028 | -4.669217 |
| C | -1.177867 | 2.387056  | -2.632459 |
| H | -0.266659 | 2.905367  | -2.274383 |
| H | -1.144388 | 2.367736  | -3.742486 |
| C | -2.428472 | 3.090738  | -2.107826 |
| H | -2.403481 | 4.162092  | -2.390446 |
| H | -2.488872 | 3.027039  | -1.003099 |
| H | -3.354084 | 2.646601  | -2.524987 |

Conformation 19.

Multiplicity: 5

Charge: 0

E(B97-3c) = -5596.387477016558 Hartree  
E(M06/def2-TZVP) = -5596.635339660322 Hartree  
E(PBE - D3(BJ)/def2-TZVP) = -5594.599477123957 Hartree  
E(PBE0 - D3(BJ)/def2-TZVP) = -5594.995563611253 Hartree  
E(PBEh-3c) = -5589.622642189024 Hartree  
E(PM6) = -0.77869 Kcal/mol  
E(PM7) = 114.46982 Kcal/mol  
E( $\omega$ B97X-V/def2-TZVP) = -5597.232967487661 Hartree  
E(GFN1-xTB) = -152.457780957736 Hartree  
E(GFN2-xTB) = -152.110266014246 Hartree  
E(GFN-FF) = -19.097472231007 Hartree

Coordinates:

|    |           |           |           |
|----|-----------|-----------|-----------|
| Cr | 0.200994  | 0.130735  | 0.478513  |
| Al | 2.569220  | -3.159814 | -2.701227 |
| Cl | 1.321595  | 1.431955  | 1.989730  |
| Cl | 1.955744  | -2.716336 | -4.759525 |
| Cl | 4.604405  | -2.481540 | -2.381178 |
| N  | -2.383548 | -1.491453 | 1.085562  |
| H  | -3.246383 | -1.930378 | 1.416234  |
| N  | -0.558688 | -1.598024 | -0.392419 |
| N  | 1.459272  | -1.908440 | -1.639487 |
| P  | -1.462414 | -0.397439 | 2.065064  |
| P  | 2.104997  | -0.650091 | -0.650570 |
| P  | -0.683444 | 1.884797  | -1.110424 |
| C  | -1.797372 | -2.065107 | -0.037940 |
| C  | -2.460604 | -3.058337 | -0.773935 |
| H  | -3.453470 | -3.408466 | -0.460870 |
| C  | -1.825699 | -3.556366 | -1.922997 |
| H  | -2.338298 | -4.297781 | -2.554066 |
| C  | -0.543776 | -3.134372 | -2.265534 |
| H  | -0.041437 | -3.503947 | -3.169098 |
| C  | 0.129802  | -2.200073 | -1.434959 |
| C  | -2.675253 | 0.834649  | 2.630168  |
| C  | -3.834322 | 1.128347  | 1.883145  |
| H  | -4.084816 | 0.530613  | 0.993944  |
| C  | -4.648499 | 2.207718  | 2.256786  |
| H  | -5.549807 | 2.430922  | 1.666843  |
| C  | -4.305305 | 3.006814  | 3.358613  |
| H  | -4.942992 | 3.857594  | 3.642417  |
| C  | -3.141833 | 2.724058  | 4.094890  |
| H  | -2.865569 | 3.352465  | 4.955116  |
| C  | -2.325355 | 1.643404  | 3.735454  |
| H  | -1.402717 | 1.434589  | 4.298351  |
| C  | -0.942640 | -1.311164 | 3.563582  |
| C  | -1.839566 | -1.668390 | 4.591705  |
| H  | -2.887272 | -1.329504 | 4.554215  |
| C  | -1.389104 | -2.445499 | 5.668211  |
| H  | -2.087167 | -2.726135 | 6.471606  |
| C  | -0.046997 | -2.861607 | 5.723633  |
| H  | 0.302309  | -3.469303 | 6.572375  |
| C  | 0.848970  | -2.497447 | 4.705859  |
| H  | 1.903057  | -2.811039 | 4.749106  |
| C  | 0.405417  | -1.721396 | 3.625378  |
| H  | 1.106867  | -1.412091 | 2.832928  |
| C  | 2.901678  | 0.624638  | -1.687960 |
| C  | 3.158927  | 1.867854  | -1.063023 |
| H  | 2.918620  | 2.007423  | 0.004044  |
| C  | 3.664594  | 2.937756  | -1.816323 |
| H  | 3.857291  | 3.902581  | -1.323160 |
| C  | 3.894603  | 2.783578  | -3.193614 |
| H  | 4.282323  | 3.626227  | -3.786451 |
| C  | 3.615954  | 1.555356  | -3.815544 |
| H  | 3.781813  | 1.430003  | -4.896191 |
| C  | 3.122191  | 0.473182  | -3.071447 |
| H  | 2.883773  | -0.469055 | -3.584794 |
| C  | 3.339306  | -1.413906 | 0.456005  |
| C  | 4.493255  | -0.728150 | 0.876559  |
| H  | 4.749596  | 0.243937  | 0.431093  |
| C  | 5.326710  | -1.300149 | 1.847957  |
| H  | 6.234335  | -0.765931 | 2.167342  |
| C  | 5.014542  | -2.550735 | 2.404828  |
| H  | 5.675666  | -2.996921 | 3.163142  |
| C  | 3.861394  | -3.234833 | 1.984988  |
| H  | 3.617205  | -4.222102 | 2.406239  |
| C  | 3.019837  | -2.667121 | 1.018719  |

|   |           |           |           |
|---|-----------|-----------|-----------|
| H | 2.119498  | -3.206123 | 0.685277  |
| C | 2.217915  | -5.018282 | -2.102469 |
| H | 3.169192  | -5.373346 | -1.645572 |
| H | 1.486891  | -4.985758 | -1.261565 |
| C | 1.743823  | -6.014866 | -3.169758 |
| H | 1.600700  | -7.042990 | -2.769293 |
| H | 2.464147  | -6.089580 | -4.010778 |
| H | 0.776599  | -5.708090 | -3.622430 |
| C | -2.511310 | 1.767033  | -1.347232 |
| C | -3.387092 | 2.857538  | -1.169843 |
| H | -2.985454 | 3.840278  | -0.882608 |
| C | -4.769621 | 2.690833  | -1.344831 |
| H | -5.441893 | 3.550871  | -1.201398 |
| C | -5.295869 | 1.438522  | -1.701370 |
| H | -6.380901 | 1.312034  | -1.836053 |
| C | -4.428210 | 0.350107  | -1.892329 |
| H | -4.824930 | -0.636277 | -2.177940 |
| C | -3.046934 | 0.511336  | -1.712596 |
| H | -2.380299 | -0.350555 | -1.855445 |
| C | -0.433074 | 3.558439  | -0.408313 |
| C | 0.285444  | 4.574866  | -1.068778 |
| H | 0.693591  | 4.408010  | -2.075418 |
| C | 0.496150  | 5.813062  | -0.439770 |
| H | 1.061719  | 6.598620  | -0.963931 |
| C | -0.012428 | 6.050236  | 0.845888  |
| H | 0.153751  | 7.022296  | 1.334555  |
| C | -0.724826 | 5.037957  | 1.510956  |
| H | -1.117511 | 5.207614  | 2.525091  |
| C | -0.921386 | 3.796035  | 0.896391  |
| H | -1.454726 | 3.000287  | 1.436763  |
| C | -0.065781 | 2.014565  | -2.863818 |
| H | -0.583699 | 2.877496  | -3.333196 |
| H | 1.010179  | 2.269364  | -2.780663 |
| C | -0.242149 | 0.744195  | -3.694170 |
| H | 0.221993  | 0.879323  | -4.691211 |
| H | -1.309649 | 0.496098  | -3.855088 |
| H | 0.254239  | -0.131904 | -3.234662 |

Conformation 29.

Multiplicity: 5

Charge: 0

E(B97-3c) = -5596.389669026221 Hartree  
E(M06/def2-TZVP) = -5596.638730052295 Hartree  
E(PBE - D3(BJ)/def2-TZVP) = -5594.601785709922 Hartree  
E(PBE0 - D3(BJ)/def2-TZVP) = -5594.999421417705 Hartree  
E(PBEh-3c) = -5589.628270586791 Hartree  
E(PM6) = -3.43148 Kcal/mol  
E(PM7) = 116.09397 Kcal/mol  
E( $\omega$ B97X-V/def2-TZVP) = -5597.237306392426 Hartree  
E(GFN1-xTB) = -152.466153330815 Hartree  
E(GFN2-xTB) = -152.114335810143 Hartree  
E(GFN-FF) = -19.131015148398 Hartree

Coordinates:

|    |           |           |           |
|----|-----------|-----------|-----------|
| Cr | 0.137706  | -0.643828 | 0.213450  |
| Al | -1.477923 | 2.050779  | -3.849012 |
| Cl | 1.288344  | -2.626509 | 0.122526  |
| Cl | -3.611179 | 2.374316  | -3.544760 |
| Cl | -0.399593 | 3.975192  | -3.890985 |
| N  | -1.814018 | 0.387719  | 2.403544  |
| H  | -2.423369 | 0.611919  | 3.192872  |
| N  | -1.184244 | 0.952616  | 0.209564  |
| N  | -0.873858 | 1.272507  | -2.133754 |
| P  | -1.160654 | -1.198610 | 2.149099  |
| P  | -0.164571 | -0.301338 | -2.109950 |
| P  | 2.043143  | 0.671158  | 1.223288  |
| C  | -1.807472 | 1.319445  | 1.372993  |
| C  | -2.413938 | 2.574574  | 1.524662  |
| H  | -2.893401 | 2.844816  | 2.475312  |
| C  | -2.374227 | 3.457804  | 0.434495  |
| H  | -2.805378 | 4.465270  | 0.531892  |
| C  | -1.823063 | 3.065673  | -0.781954 |
| H  | -1.803883 | 3.741434  | -1.645288 |
| C  | -1.284250 | 1.761193  | -0.910361 |
| C  | -0.461243 | -1.681717 | 3.762077  |
| C  | 0.540921  | -2.675972 | 3.734958  |
| H  | 0.895274  | -3.061112 | 2.763957  |
| C  | 1.092248  | -3.141448 | 4.936917  |
| H  | 1.874356  | -3.915397 | 4.912758  |
| C  | 0.654300  | -2.619568 | 6.165223  |
| H  | 1.088363  | -2.987827 | 7.107213  |
| C  | -0.329293 | -1.618661 | 6.191088  |
| H  | -0.661259 | -1.193779 | 7.150361  |
| C  | -0.885583 | -1.146645 | 4.993135  |
| H  | -1.639799 | -0.346496 | 5.030163  |
| C  | -2.603914 | -2.310294 | 1.923615  |
| C  | -3.292233 | -2.930675 | 2.985502  |
| H  | -2.948399 | -2.793586 | 4.022580  |
| C  | -4.409302 | -3.734908 | 2.714248  |
| H  | -4.946658 | -4.220870 | 3.542891  |
| C  | -4.836702 | -3.928307 | 1.389495  |



|   |           |           |           |   |           |           |           |
|---|-----------|-----------|-----------|---|-----------|-----------|-----------|
| H | -5.710035 | -4.565607 | 1.182985  | P | 0.547016  | -2.061510 | -0.550634 |
| C | -4.144089 | -3.321554 | 0.328843  | C | 0.936624  | 1.640612  | -1.995074 |
| H | -4.461554 | -3.478451 | -0.713303 | C | 0.517820  | 2.202440  | -3.207091 |
| C | -3.026614 | -2.519153 | 0.593871  | H | 1.248584  | 2.417854  | -3.998031 |
| H | -2.466359 | -2.056415 | -0.235575 | C | -0.846376 | 2.488924  | -3.357576 |
| C | 1.384160  | -0.247162 | -3.077045 | H | -1.214074 | 2.928983  | -4.296435 |
| C | 1.854007  | 0.934293  | -3.685905 | C | -1.737337 | 2.254059  | -2.316779 |
| H | 1.261645  | 1.861661  | -3.655091 | H | -2.786837 | 2.556049  | -2.404178 |
| C | 3.093679  | 0.935843  | -4.341045 | C | -1.268454 | 1.696095  | -1.097296 |
| H | 3.450059  | 1.864383  | -4.811750 | C | 4.215403  | -0.193207 | -0.492760 |
| C | 3.868422  | -0.233218 | -4.400861 | C | 4.889032  | -0.709680 | 0.631789  |
| H | 4.838576  | -0.226664 | -4.920556 | H | 4.597430  | -0.390139 | 1.644334  |
| C | 3.408264  | -1.407706 | -3.784318 | C | 5.897052  | -1.666032 | 0.456160  |
| H | 4.020173  | -2.322179 | -3.807291 | H | 6.413673  | -2.079640 | 1.335585  |
| C | 2.178782  | -1.415828 | -3.110008 | C | 6.238831  | -2.108124 | -0.833839 |
| H | 1.858895  | -2.314914 | -2.561014 | H | 7.028837  | -2.862527 | -0.966662 |
| C | -1.369528 | -1.374433 | -2.984722 | C | 5.565539  | -1.591298 | -1.951963 |
| C | -0.987979 | -2.484959 | -3.762911 | H | 5.826110  | -1.938529 | -2.963389 |
| H | 0.074620  | -2.682127 | -3.963722 | C | 4.550980  | -0.635526 | -1.785012 |
| C | -1.966259 | -3.332768 | -4.302536 | H | 3.997310  | -0.260502 | -2.658495 |
| H | -1.658811 | -4.191902 | -4.917685 | C | 3.509400  | 2.404121  | 0.641244  |
| C | -3.328575 | -3.083812 | -4.070709 | C | 4.841160  | 2.834343  | 0.471391  |
| H | -4.092439 | -3.747675 | -4.502801 | H | 5.535318  | 2.249227  | -0.152288 |
| C | -3.711612 | -1.970940 | -3.304941 | C | 5.279798  | 4.002574  | 1.111621  |
| H | -4.776630 | -1.743948 | -3.145738 | H | 6.319525  | 4.339958  | 0.982396  |
| C | -2.740103 | -1.120395 | -2.757959 | C | 4.396743  | 4.738235  | 1.921322  |
| H | -3.056392 | -0.230862 | -2.192995 | H | 4.748802  | 5.651440  | 2.425016  |
| C | -1.065050 | 0.936903  | -5.437942 | C | 3.071797  | 4.306824  | 2.097665  |
| H | -0.531539 | 1.628403  | -6.130010 | H | 2.377162  | 4.868709  | 2.740170  |
| H | -0.321811 | 0.145782  | -5.203448 | C | 2.627800  | 3.138998  | 1.462602  |
| C | -2.279250 | 0.316463  | -6.145901 | H | 1.594454  | 2.822988  | 1.611251  |
| H | -1.999738 | -0.204473 | -7.087947 | C | -2.567093 | -0.294362 | 2.089164  |
| H | -3.042206 | 1.080106  | -6.402114 | C | -3.285112 | -1.103799 | 1.185481  |
| H | -2.788918 | -0.428905 | -5.501970 | H | -3.147669 | -0.975335 | 0.102019  |
| C | 2.483920  | 2.328237  | 0.559810  | C | -4.205578 | -2.042256 | 1.664807  |
| C | 3.393146  | 3.164383  | 1.244136  | H | -4.775559 | -2.655220 | 0.951450  |
| H | 3.832114  | 2.835529  | 2.199272  | C | -4.392229 | -2.202487 | 3.046822  |
| C | 3.724273  | 4.419534  | 0.716697  | H | -5.117143 | -2.939884 | 3.423576  |
| H | 4.434940  | 5.066804  | 1.253362  | C | -3.653341 | -1.419383 | 3.947422  |
| C | 3.144111  | 4.856520  | -0.488367 | H | -3.801386 | -1.536738 | 5.031696  |
| H | 3.398690  | 5.848477  | -0.892098 | C | -2.743308 | -0.463208 | 3.474347  |
| C | 2.237080  | 4.033366  | -1.170676 | H | -2.199831 | 0.177062  | 4.183985  |
| H | 1.755417  | 4.360566  | -2.105122 | C | -1.119129 | 2.283349  | 2.571539  |
| C | 1.915029  | 2.770211  | -0.647986 | C | -0.327158 | 2.055079  | 3.720492  |
| H | 1.208422  | 2.129168  | -1.189456 | H | 0.078103  | 1.050261  | 3.919633  |
| C | 1.755884  | 1.054497  | 2.998745  | C | -0.007171 | 3.123073  | 4.570895  |
| C | 2.328944  | 0.299312  | 4.042764  | H | 0.606618  | 2.939559  | 5.465978  |
| H | 2.996855  | -0.544388 | 3.818462  | C | -0.450185 | 4.422397  | 4.270119  |
| C | 2.052388  | 0.617943  | 5.381056  | H | -0.194155 | 5.260367  | 4.936750  |
| H | 2.509817  | 0.022197  | 6.184807  | C | -1.212211 | 4.651115  | 3.112785  |
| C | 1.192575  | 1.681705  | 5.693271  | H | -1.557219 | 5.666685  | 2.866291  |
| H | 0.979189  | 1.929680  | 6.744185  | C | -1.550233 | 3.589121  | 2.260520  |
| C | 0.606295  | 2.428786  | 4.657592  | H | -2.137387 | 3.786761  | 1.350507  |
| H | -0.066000 | 3.268620  | 4.892408  | C | -4.932897 | 0.934737  | -1.404373 |
| C | 0.885611  | 2.120022  | 3.320065  | H | -4.154231 | 0.444687  | -2.036141 |
| H | 0.436580  | 2.720966  | 2.514021  | H | -5.402246 | 0.106147  | -0.827137 |
| C | 3.656141  | -0.253147 | 1.206617  | C | -5.981044 | 1.619757  | -2.293581 |
| H | 4.362892  | 0.255557  | 1.895862  | H | -6.457391 | 0.927428  | -3.022966 |
| H | 3.424374  | -1.260739 | 1.610635  | H | -5.542881 | 2.460003  | -2.872929 |
| C | 4.215297  | -0.371114 | -0.210067 | H | -6.798207 | 2.062400  | -1.686278 |
| H | 5.164425  | -0.943704 | -0.205483 | C | -0.738851 | -3.196662 | 0.111777  |
| H | 4.417923  | 0.622884  | -0.656694 | C | -0.804069 | -3.330960 | 1.516672  |
| H | 3.502630  | -0.904532 | -0.867520 | H | -0.156784 | -2.707116 | 2.154638  |

Conformation 3.

Multiplicity: 5

Charge: 0

E(B97-3c) = -5596.388285026355 Hartree

E(M06/def2-TZVP) = -5596.636453081783 Hartree

E(PBE - D3(BJ)/def2-TZVP) = -5594.600260659020 Hartree

E(PBE0 - D3(BJ)/def2-TZVP) = -5594.996489040624 Hartree

E(PBEh-3c) = -5589.625217250199 Hartree

E(PM6) = -2.23795 Kcal/mol

E(PM7) = 106.40593 Kcal/mol

E( $\omega$ B97X-V/def2-TZVP) = -5597.234034402487 Hartree

E(GFN1-xTB) = -152.461881746984 Hartree

E(GFN2-xTB) = -152.113314569061 Hartree

E(GFN-FF) = -19.124607277134 Hartree

Coordinates:

|    |           |           |           |
|----|-----------|-----------|-----------|
| Cr | 0.705972  | 0.132565  | 0.595169  |
| Al | -4.014180 | 2.106421  | -0.092685 |
| Cl | 1.582480  | -0.778067 | 2.518205  |
| Cl | -4.745132 | 2.057315  | 1.945252  |
| Cl | -3.916572 | 4.211337  | -0.695184 |
| N  | 2.289055  | 1.391709  | -1.761653 |
| H  | 2.930406  | 1.842610  | -2.419709 |
| N  | 0.064033  | 1.327230  | -0.986988 |
| N  | -2.111295 | 1.526783  | -0.023656 |
| P  | 2.805195  | 0.924069  | -0.176599 |
| P  | -1.369561 | 0.897108  | 1.403174  |

Conformation 34.

Multiplicity: 5  
 Charge: 0  
 E(B97-3c) = -5596.380713574475 Hartree  
 E(M06/def2-TZVP) = -5596.629801015921 Hartree  
 E(PBE - D3(BJ)/def2-TZVP) = -5594.593726632473 Hartree  
 E(PBE0 - D3(BJ)/def2-TZVP) = -5594.990670524994 Hartree  
 E(PBEh-3c) = -5589.619190962568 Hartree  
 E(PM6) = -1.13712 Kcal/mol  
 E(PM7) = 122.68174 Kcal/mol  
 E( $\omega$ B97X-V/def2-TZVP) = -5597.228309406410 Hartree  
 E(GFN1-xTB) = -152.459079655257 Hartree  
 E(GFN2-xTB) = -152.107621759448 Hartree  
 E(GFN-FF) = -19.085915780954 Hartree

Coordinates:

|    |           |           |           |
|----|-----------|-----------|-----------|
| Cr | 0.129793  | -0.417705 | -0.299332 |
| Al | -3.785280 | 2.863836  | 0.270108  |
| Cl | 0.933795  | -0.628176 | -2.433145 |
| Cl | -5.381433 | 1.452142  | 0.734459  |
| Cl | -3.525005 | 4.341928  | 1.874054  |
| N  | -0.681760 | -2.515237 | 1.858843  |
| H  | -0.852408 | -3.305417 | 2.486562  |
| N  | -1.272409 | -0.323860 | 1.253338  |
| N  | -2.154539 | 1.740641  | 0.434900  |
| P  | 0.050239  | -2.750903 | 0.307031  |
| P  | -1.143342 | 1.457610  | -0.923080 |
| P  | 2.367988  | -0.024861 | 0.854439  |
| C  | -1.354178 | -1.339171 | 2.168332  |
| C  | -2.062479 | -1.215831 | 3.371370  |
| H  | -2.099340 | -2.056833 | 4.077003  |
| C  | -2.683687 | 0.012293  | 3.644301  |
| H  | -3.207532 | 0.161686  | 4.600272  |
| C  | -2.666753 | 1.037011  | 2.703179  |
| H  | -3.156575 | 2.002754  | 2.884772  |
| C  | -2.020404 | 0.829707  | 1.457176  |
| C  | 1.455697  | -3.832577 | 0.752123  |
| C  | 2.042195  | -3.750550 | 2.033464  |
| H  | 1.611848  | -3.082339 | 2.794261  |
| C  | 3.188835  | -4.502871 | 2.330303  |
| H  | 3.637541  | -4.431958 | 3.332801  |
| C  | 3.764305  | -5.329577 | 1.352096  |
| H  | 4.665218  | -5.916758 | 1.585509  |
| C  | 3.187831  | -5.405326 | 0.072748  |
| H  | 3.636931  | -6.049866 | -0.697847 |
| C  | 2.038888  | -4.661306 | -0.230036 |
| H  | 1.591533  | -4.722528 | -1.234203 |
| C  | -1.071553 | -3.814460 | -0.679321 |
| C  | -1.704277 | -3.213000 | -1.786817 |
| H  | -1.445163 | -2.180042 | -2.072465 |
| C  | -2.648285 | -3.938064 | -2.530005 |
| H  | -3.140413 | -3.459676 | -3.390218 |
| C  | -2.958500 | -5.258870 | -2.172178 |
| H  | -3.700714 | -5.827060 | -2.753468 |
| C  | -2.320010 | -5.864125 | -1.074323 |
| H  | -2.561267 | -6.902545 | -0.800340 |
| C  | -1.375054 | -5.147045 | -0.328029 |
| H  | -0.868863 | -5.627354 | 0.524699  |
| C  | -0.331732 | 3.033875  | -1.356030 |
| C  | 0.716068  | 2.996921  | -2.303507 |
| H  | 1.038107  | 2.030546  | -2.723733 |
| C  | 1.357562  | 4.186273  | -2.676424 |
| H  | 2.173178  | 4.154304  | -3.414475 |
| C  | 0.975798  | 5.407216  | -2.097276 |
| H  | 1.482404  | 6.338952  | -2.392487 |
| C  | -0.032722 | 5.433899  | -1.121660 |
| H  | -0.321968 | 6.383447  | -0.646231 |
| C  | -0.684030 | 4.251449  | -0.740248 |
| H  | -1.454035 | 4.286699  | 0.046056  |
| C  | -2.254327 | 0.975520  | -2.299558 |
| C  | -2.001985 | 1.322813  | -3.639736 |
| H  | -1.185924 | 2.017348  | -3.885873 |
| C  | -2.801176 | 0.788616  | -4.661168 |
| H  | -2.603927 | 1.068575  | -5.707064 |
| C  | -3.848515 | -0.094944 | -4.354324 |
| H  | -4.475301 | -0.508371 | -5.159064 |
| C  | -4.106204 | -0.434349 | -3.015779 |
| H  | -4.942099 | -1.103491 | -2.761826 |
| C  | -3.310777 | 0.093136  | -1.988719 |
| H  | -3.535089 | -0.160119 | -0.941576 |
| C  | -3.978358 | 3.752862  | -1.495381 |
| H  | -4.128732 | 4.825030  | -1.231117 |
| H  | -3.026549 | 3.731971  | -2.067795 |
| C  | -5.133454 | 3.261695  | -2.379842 |
| H  | -5.271741 | 3.894228  | -3.284305 |
| H  | -6.097822 | 3.253484  | -1.831007 |
| H  | -4.964546 | 2.223701  | -2.731083 |
| C  | 2.938748  | 1.691814  | 0.500435  |
| C  | 2.194420  | 2.766557  | 1.034192  |
| H  | 1.312782  | 2.575778  | 1.665541  |
| C  | 2.563557  | 4.089570  | 0.766323  |
| H  | 1.969464  | 4.912388  | 1.189570  |

|   |          |           |           |
|---|----------|-----------|-----------|
| C | 3.667147 | 4.361418  | -0.058699 |
| H | 3.946521 | 5.402306  | -0.280360 |
| C | 4.397307 | 3.300598  | -0.612231 |
| H | 5.257129 | 3.503805  | -1.268848 |
| C | 4.037442 | 1.971318  | -0.336475 |
| H | 4.625839 | 1.156316  | -0.780687 |
| C | 2.370466 | -0.075489 | 2.703600  |
| C | 1.214400 | 0.349993  | 3.391299  |
| H | 0.338193 | 0.703100  | 2.830244  |
| C | 1.160806 | 0.312032  | 4.792776  |
| H | 0.246869 | 0.646985  | 5.305948  |
| C | 2.256787 | -0.163314 | 5.527589  |
| H | 2.213412 | -0.199065 | 6.626764  |
| C | 3.412857 | -0.590047 | 4.852851  |
| H | 4.281262 | -0.955362 | 5.422552  |
| C | 3.473030 | -0.543566 | 3.452214  |
| H | 4.391648 | -0.872794 | 2.946900  |
| C | 3.825493 | -1.098137 | 0.408356  |
| H | 4.743702 | -0.553889 | 0.717481  |
| H | 3.743227 | -1.986810 | 1.065479  |
| C | 3.911036 | -1.538834 | -1.052716 |
| H | 4.836938 | -2.128456 | -1.210743 |
| H | 3.909394 | -0.685277 | -1.757136 |
| H | 3.046608 | -2.167944 | -1.334324 |

Conformation 4.

Multiplicity: 5  
 Charge: 0  
 E(B97-3c) = -5596.393395311546 Hartree  
 E(M06/def2-TZVP) = -5596.640177094025 Hartree  
 E(PBE - D3(BJ)/def2-TZVP) = -5594.605472482395 Hartree  
 E(PBE0 - D3(BJ)/def2-TZVP) = -5595.002097578518 Hartree  
 E(PBEh-3c) = -5589.631420967067 Hartree  
 E(PM6) = -8.32198 Kcal/mol  
 E(PM7) = 104.41180 Kcal/mol  
 E( $\omega$ B97X-V/def2-TZVP) = -5597.239390152394 Hartree  
 E(GFN1-xTB) = -152.465031779568 Hartree  
 E(GFN2-xTB) = -152.114128355145 Hartree  
 E(GFN-FF) = -19.127906897701 Hartree

Coordinates:

|    |           |           |           |
|----|-----------|-----------|-----------|
| Cr | 0.851843  | -0.149373 | -0.042183 |
| Al | -3.885964 | -1.774537 | 1.024903  |
| Cl | 2.164236  | -0.764231 | -1.829198 |
| Cl | -4.080215 | -2.717974 | 2.999136  |
| Cl | -4.959790 | 0.140992  | 0.959741  |
| N  | 1.860850  | 0.980238  | 2.673361  |
| N  | 2.341399  | 1.266018  | 3.530539  |
| H  | -0.115799 | 0.036732  | 1.795297  |
| N  | -2.007867 | -1.157183 | 0.963230  |
| P  | 2.725289  | 0.339480  | 1.321347  |
| P  | -0.937174 | -1.658414 | -0.293193 |
| P  | 0.222623  | 2.069408  | -0.963426 |
| C  | 0.501599  | 0.700581  | 2.821779  |
| C  | -0.174235 | 1.085337  | 3.985224  |
| H  | 0.355450  | 1.634620  | 4.775190  |
| H  | -1.528137 | 0.740354  | 4.098419  |
| H  | -2.095532 | 1.031783  | 4.994738  |
| C  | -2.157537 | 0.007009  | 3.099648  |
| H  | -3.199199 | -0.310439 | 3.212984  |
| C  | -1.431623 | -0.374869 | 1.942778  |
| C  | 3.915021  | 1.654492  | 0.905656  |
| C  | 3.852386  | 2.939148  | 1.482636  |
| H  | 3.113307  | 3.150376  | 2.269833  |
| C  | 4.706590  | 3.955245  | 1.026080  |
| H  | 4.655916  | 4.955711  | 1.482051  |
| C  | 5.614564  | 3.699281  | -0.013445 |
| H  | 6.278046  | 4.499428  | -0.374682 |
| C  | 5.669857  | 2.421970  | -0.597645 |
| H  | 6.371452  | 2.221911  | -1.421447 |
| H  | 4.824335  | 1.400608  | -0.145016 |
| C  | 4.842573  | 0.409871  | -0.625320 |
| C  | 3.735047  | -1.066958 | 1.918738  |
| C  | 3.169578  | -2.350054 | 1.762197  |
| H  | 2.194479  | -2.457054 | 1.257466  |
| C  | 3.853924  | -3.478983 | 2.232490  |
| H  | 3.405862  | -4.475896 | 2.103173  |
| C  | 5.106209  | -3.330528 | 2.851094  |
| H  | 5.647669  | -4.216837 | 3.215641  |
| C  | 5.677036  | -2.054197 | 2.997800  |
| H  | 6.662475  | -1.942990 | 3.475389  |
| C  | 4.996232  | -0.920234 | 2.531010  |
| H  | 5.448380  | 0.079121  | 2.631680  |
| C  | -1.927493 | -1.646859 | -1.824788 |
| C  | -2.877307 | -0.622078 | -2.017015 |
| H  | -3.075610 | 0.114492  | -1.225340 |
| C  | -3.623880 | -0.573765 | -3.200406 |
| H  | -4.378276 | 0.215850  | -3.326719 |
| C  | -3.409471 | -1.524135 | -4.210942 |
| H  | -3.997187 | -1.483101 | -5.140564 |
| C  | -2.445834 | -2.528919 | -4.031844 |

|   |           |           |           |   |           |           |           |
|---|-----------|-----------|-----------|---|-----------|-----------|-----------|
| H | -2.277194 | -3.280502 | -4.817954 | H | -0.284501 | 6.749312  | 0.617919  |
| C | -1.707026 | -2.595856 | -2.841428 | C | -2.420746 | 6.332378  | 0.653782  |
| H | -0.974614 | -3.403302 | -2.695465 | H | -2.703491 | 7.339414  | 0.311829  |
| C | -0.444034 | -3.389649 | 0.058823  | C | -3.413199 | 5.672328  | 0.905498  |
| C | 0.668593  | -3.920845 | -0.633533 | H | -4.474942 | 5.623874  | 0.761679  |
| H | 1.192643  | -3.305058 | -1.383052 | C | -3.055656 | 4.085053  | 1.336018  |
| C | 1.132743  | -5.208042 | -0.324981 | H | -3.835531 | 3.327467  | 1.504317  |
| H | 1.997341  | -5.618791 | -0.868724 | C | -0.504586 | 2.250409  | 3.699739  |
| C | 0.508058  | -5.960706 | 0.684504  | C | -0.986445 | 3.209863  | 4.612971  |
| H | 0.877141  | -6.968743 | 0.928638  | H | -1.740837 | 3.946192  | 4.293389  |
| C | -0.580040 | -5.420543 | 1.388938  | C | -0.490514 | 3.229856  | 5.924772  |
| H | -1.065651 | -5.999574 | 2.189021  | H | -0.864162 | 3.978533  | 6.639855  |
| C | -1.059229 | -4.137247 | 1.083809  | C | 0.487115  | 2.302173  | 6.324152  |
| H | -1.899328 | -3.718297 | 1.660732  | H | 0.876651  | 2.326394  | 7.353305  |
| C | -4.376475 | -3.111624 | -0.352043 | C | 0.976444  | 1.353345  | 5.411353  |
| H | -4.604370 | -2.595893 | -1.308771 | H | 1.752416  | 0.633650  | 5.713342  |
| H | -3.493964 | -3.753793 | -0.572477 | C | 0.485712  | 1.328315  | 4.099101  |
| C | -5.563813 | -3.992574 | 0.070350  | H | 0.878121  | 0.599642  | 3.369269  |
| H | -5.814702 | -4.761563 | -0.693241 | C | 2.045361  | -1.604276 | -1.350956 |
| H | -6.482067 | -3.389334 | 0.234964  | C | 1.701389  | -2.722554 | -2.136700 |
| H | -5.361642 | -4.521362 | 1.024645  | H | 1.018901  | -3.495179 | -1.749540 |
| C | -0.827882 | 2.041125  | -2.472425 | C | 2.224268  | -2.848395 | -3.431947 |
| C | -0.448574 | 1.147655  | -3.498609 | H | 1.951606  | -3.724721 | -4.039238 |
| H | 0.389485  | 0.451036  | -3.332442 | C | 3.088724  | -1.869499 | -3.946395 |
| C | -1.147348 | 1.140423  | -4.713011 | H | 3.492877  | -1.970626 | -4.965056 |
| H | -0.850331 | 0.436629  | -5.504826 | C | 3.424375  | -0.751376 | -3.166667 |
| C | -2.238601 | 2.002558  | -4.906924 | H | 4.078907  | 0.032091  | -3.575762 |
| H | -2.794040 | 1.984526  | -5.857021 | C | 2.895580  | -0.606402 | -1.876524 |
| C | -2.631127 | 2.875353  | -3.880032 | H | 3.105517  | 0.300520  | -1.286776 |
| H | -3.490403 | 3.548183  | -4.024319 | C | 2.604353  | -1.629725 | 1.560474  |
| C | -1.925719 | 2.902584  | -2.666756 | C | 2.162093  | -1.908921 | 2.872745  |
| H | -2.228728 | 3.598082  | -1.870029 | H | 1.089383  | -2.049971 | 3.077173  |
| C | -0.688830 | 3.054402  | 0.279541  | C | 3.095556  | -2.074679 | 3.904080  |
| C | -0.095941 | 4.125885  | 0.980870  | H | 2.744483  | -2.323639 | 4.917129  |
| H | 0.908303  | 4.482779  | 0.707310  | C | 4.470157  | -1.948855 | 3.639917  |
| C | -0.781852 | 4.743285  | 2.039057  | H | 5.202409  | -2.083036 | 4.450418  |
| H | -0.310932 | 5.581439  | 2.575751  | C | 4.908179  | -1.665643 | 2.336823  |
| C | -2.060337 | 4.298970  | 2.412145  | H | 5.984203  | -1.578467 | 2.123044  |
| H | -2.592648 | 4.784206  | 3.244280  | C | 3.980690  | -1.503745 | 1.296347  |
| C | -2.653466 | 3.226965  | 1.725209  | H | 4.331610  | -1.298335 | 0.274385  |
| H | -3.644236 | 2.842193  | 2.009876  | C | 2.497166  | -4.905944 | 0.919731  |
| C | -1.970446 | 2.605530  | 0.672607  | H | 2.972617  | -4.400428 | 1.787983  |
| H | -2.445121 | 1.747272  | 0.172393  | H | 2.380643  | -5.966156 | 1.251367  |
| C | 1.673233  | 3.091149  | -1.517928 | C | 3.421012  | -4.863424 | -0.301196 |
| H | 2.283412  | 3.281247  | -0.611397 | H | 4.381291  | -5.395621 | -0.122645 |
| H | 2.269796  | 2.380705  | -2.128452 | H | 3.682878  | -3.824751 | -0.588249 |
| C | 1.353274  | 4.374461  | -2.279967 | H | 2.950509  | -5.331028 | -1.191507 |
| H | 2.288427  | 4.909599  | -2.544476 | C | 0.110244  | 1.165780  | -3.202847 |
| H | 0.725447  | 5.065632  | -1.682093 | C | 1.182954  | 2.080875  | -3.114966 |
| H | 0.806716  | 4.158980  | -3.219161 | H | 1.384480  | 2.594410  | -2.160616 |

Conformation 8.

Multiplicity: 5

Charge: 0

E(B97-3c) = -5596.388164410458 Hartree

E(M06/def2-TZVP) = -5596.635454850569 Hartree

E(PBE - D3(BJ)/def2-TZVP) = -5594.600298670206 Hartree

E(PBE0 - D3(BJ)/def2-TZVP) = -5594.997220541527 Hartree

E(PBEh-3c) = -5589.625248199500 Hartree

E(PM6) = -6.60257 Kcal/mol

E(PM7) = 97.36029 Kcal/mol

E(ωB97X-V/def2-TZVP) = -5597.234767327922 Hartree

E(GFN1-xTB) = -152.464141699474 Hartree

E(GFN2-xTB) = -152.113454681391 Hartree

E(GFN-FF) = -19.126872343514 Hartree

Coordinates:

|    |           |           |           |
|----|-----------|-----------|-----------|
| Cr | 0.123190  | 0.706834  | 0.515218  |
| Al | 0.588363  | -4.396157 | 0.869767  |
| Cl | 1.872643  | 2.185773  | 0.360448  |
| Cl | -0.296884 | -4.782115 | 2.826314  |
| Cl | -0.484770 | -5.444816 | -0.747886 |
| N  | -2.561846 | 1.133173  | 2.034900  |
| H  | -3.329178 | 1.365636  | 2.671603  |
| N  | -1.309315 | -0.663051 | 1.152324  |
| N  | 0.100253  | -2.500364 | 0.560734  |
| P  | -1.120322 | 2.091672  | 1.982486  |
| P  | 1.319032  | -1.315020 | 0.298436  |
| P  | -0.969271 | 1.025835  | -1.720486 |
| C  | -2.493836 | -0.218117 | 1.675240  |
| C  | -3.599314 | -1.056777 | 1.850922  |
| H  | -4.534176 | -0.658322 | 2.267934  |
| C  | -3.476243 | -2.396458 | 1.449493  |
| H  | -4.339377 | -3.073743 | 1.528337  |
| H  | -2.267259 | -2.881104 | 0.966562  |
| C  | -2.155508 | -3.923601 | 0.645429  |
| C  | -1.150562 | -2.012045 | 0.876780  |
| C  | -1.698563 | 3.757594  | 1.523453  |
| C  | -0.699507 | 4.721022  | 1.259306  |
| H  | 0.363021  | 4.445443  | 1.356038  |
| C  | -1.065550 | 6.003445  | 0.829146  |

## UZEYAA

Conformation 14.

Multiplicity: 3

Charge: 0

E(B97-3c) = -3893.561204159994 Hartree

E(M06/def2-TZVP) = -3893.294578076202 Hartree

E(PBE - D3(BJ)/def2-TZVP) = -3891.975745389707 Hartree

E(PBE0 - D3(BJ)/def2-TZVP) = -3892.237337119500 Hartree

E(PBEh-3c) = -3888.291926142691 Hartree

E(PM6) = 88.99137 Kcal/mol

E(PM7) = 41.77057 Kcal/mol

E(ωB97X-V/def2-TZVP) = -3895.850580102099 Hartree

E(GFN1-xTB) = -161.271244584265 Hartree  
 E(GFN2-xTB) = -160.183795911328 Hartree  
 E(GFN-FF) = -22.397406714193 Hartree

Coordinates:

|    |           |           |           |
|----|-----------|-----------|-----------|
| Co | -0.172086 | -0.355137 | -0.146222 |
| N  | 1.456171  | 0.791283  | -0.325789 |
| N  | -1.116257 | 0.306368  | -1.709477 |
| C  | 3.008065  | 2.311970  | -1.773283 |
| C  | 1.659692  | 1.578250  | -1.395316 |
| C  | 0.658924  | 1.768220  | -2.381168 |
| H  | 0.950545  | 2.465317  | -3.166786 |
| C  | -0.648684 | 1.261874  | -2.536877 |
| C  | -1.435931 | 1.934978  | -3.721952 |
| C  | 3.529501  | 1.635803  | -3.068340 |
| H  | 4.478689  | 2.113246  | -3.388851 |
| H  | 2.805356  | 1.708164  | -3.901512 |
| H  | 3.732636  | 0.559654  | -2.896171 |
| C  | 2.747324  | 3.812706  | -2.056495 |
| H  | 3.703940  | 4.307556  | -2.321877 |
| H  | 2.343030  | 4.324680  | -1.159890 |
| H  | 2.043950  | 3.988571  | -2.891998 |
| C  | 4.171129  | 2.275143  | -0.761506 |
| H  | 5.047609  | 2.759497  | -1.239794 |
| H  | 4.472670  | 1.254091  | -0.476320 |
| H  | 3.954404  | 2.829669  | 0.168250  |
| C  | -0.577866 | 1.895495  | -5.014534 |
| H  | -1.162781 | 2.320713  | -5.855480 |
| H  | -0.301085 | 0.857109  | -5.282098 |
| H  | 0.355928  | 2.483684  | -4.939513 |
| C  | -2.798159 | 1.323355  | -4.108763 |
| H  | -3.183384 | 1.876833  | -4.989614 |
| H  | -3.556057 | 1.400715  | -3.311390 |
| H  | -2.721542 | 0.257698  | -4.391275 |
| C  | -1.680168 | 3.414527  | -3.334319 |
| H  | -2.219043 | 3.939857  | -4.150562 |
| H  | -0.730033 | 3.950700  | -3.145084 |
| H  | -2.295720 | 3.491414  | -2.417065 |
| C  | 2.329780  | 0.733371  | 0.785760  |
| C  | 3.182309  | -0.387033 | 1.005607  |
| C  | 3.999506  | -0.382470 | 2.156430  |
| H  | 4.645038  | -1.255786 | 2.343202  |
| C  | 4.031331  | 0.700322  | 3.040993  |
| H  | 4.696379  | 0.681996  | 3.917343  |
| C  | 3.196747  | 1.803749  | 2.806234  |
| H  | 3.215304  | 2.651760  | 3.504811  |
| C  | 2.321054  | 1.831390  | 1.710609  |
| C  | 3.383554  | -1.579328 | 0.058045  |
| H  | 3.392207  | -2.469461 | 0.724277  |
| C  | 2.319985  | -1.848357 | -1.008978 |
| H  | 1.304528  | -1.874004 | -0.555576 |
| H  | 2.487907  | -2.845724 | -1.464396 |
| H  | 2.320580  | -1.094320 | -1.817286 |
| C  | 4.770392  | -1.520469 | -0.617138 |
| H  | 4.967134  | -2.457704 | -1.177385 |
| H  | 5.585328  | -1.383478 | 0.120339  |
| H  | 4.824817  | -0.681408 | -1.339620 |
| C  | 1.383818  | 3.013068  | 1.476091  |
| H  | 1.405824  | 3.232636  | 0.388773  |
| C  | -0.071627 | 2.644101  | 1.807343  |
| H  | -0.357632 | 1.704679  | 1.293011  |
| H  | -0.766910 | 3.442214  | 1.476091  |
| H  | -0.212598 | 2.483261  | 2.894493  |
| C  | 1.799234  | 4.296247  | 2.202392  |
| H  | 1.140766  | 5.135058  | 1.898587  |
| H  | 2.845465  | 4.583912  | 1.971535  |
| H  | 1.708230  | 4.195915  | 3.304213  |
| C  | -2.423759 | -0.248314 | -1.750613 |
| C  | -3.490978 | 0.423753  | -1.074408 |
| C  | -4.785132 | -0.122078 | -1.116496 |
| H  | -5.604989 | 0.398715  | -0.598655 |
| C  | -5.049467 | -1.310945 | -1.807113 |
| H  | -6.071361 | -1.717310 | -1.849142 |
| C  | -3.992710 | -1.986726 | -2.428227 |
| H  | -4.185388 | -2.939458 | -2.947435 |
| C  | -2.674686 | -1.491780 | -2.410663 |
| C  | -3.238094 | 1.682342  | -0.253475 |
| H  | -2.235947 | 2.064570  | -0.534048 |
| C  | -4.262279 | 2.796408  | -0.515304 |
| H  | -4.355346 | 3.023375  | -1.596248 |
| H  | -3.959846 | 3.727799  | 0.005608  |
| H  | -5.271842 | 2.526958  | -0.141934 |
| C  | -3.185725 | 1.311588  | 1.237640  |
| H  | -2.370043 | 0.585864  | 1.425560  |
| H  | -4.135582 | 0.840646  | 1.565059  |
| H  | -2.996059 | 2.198437  | 1.874588  |
| C  | -1.596805 | -2.399931 | -3.004499 |
| H  | -2.146261 | -3.112637 | -3.657550 |
| C  | -0.512748 | -1.756738 | -3.880214 |
| H  | -0.952001 | -1.125365 | -4.677277 |
| H  | 0.079474  | -2.553582 | -4.375372 |

|   |           |           |           |
|---|-----------|-----------|-----------|
| H | 0.185143  | -1.129436 | -3.294870 |
| C | -0.969613 | -3.221780 | -1.867653 |
| H | -1.725942 | -3.827786 | -1.331798 |
| H | -0.522305 | -2.522959 | -1.125472 |
| H | -0.164457 | -3.890101 | -2.236479 |
| P | -0.320275 | -1.543158 | 1.769640  |
| C | 0.928347  | -2.881029 | 2.127351  |
| C | 1.001858  | -3.933327 | 1.187153  |
| H | 0.311895  | -3.951087 | 0.331452  |
| C | 1.935903  | -4.966107 | 1.336062  |
| H | 1.974861  | -5.774196 | 0.589934  |
| C | 2.817238  | -4.969073 | 2.430255  |
| H | 3.557192  | -5.775518 | 2.544208  |
| C | 2.732604  | -3.944576 | 3.384223  |
| H | 3.401690  | -3.946408 | 4.258448  |
| C | 1.792626  | -2.910797 | 3.238433  |
| H | 1.733841  | -2.129587 | 4.007128  |
| C | -1.853974 | -2.587397 | 1.921216  |
| C | -2.946888 | -2.397642 | 1.058984  |
| H | -2.889367 | -1.649480 | 0.257651  |
| C | -4.119196 | -3.156555 | 1.218374  |
| H | -4.960042 | -2.991349 | 0.529042  |
| C | -4.207065 | -4.109934 | 2.241999  |
| H | -5.126096 | -4.702315 | 2.369595  |
| C | -3.116813 | -4.306359 | 3.107958  |
| H | -3.179140 | -5.052765 | 3.914520  |
| C | -1.946942 | -3.553149 | 2.948017  |
| H | -1.095753 | -3.711525 | 3.627589  |
| C | -0.437726 | -0.584885 | 3.347862  |
| C | -1.687450 | -0.334924 | 3.955383  |
| H | -2.598479 | -0.794661 | 3.546460  |
| C | -1.776473 | 0.499217  | 5.079974  |
| H | -2.759855 | 0.688770  | 5.537243  |
| C | -0.621010 | 1.080622  | 5.627177  |
| H | -0.692652 | 1.729400  | 6.513423  |
| C | 0.624345  | 0.834091  | 5.029944  |
| H | 1.540338  | 1.289572  | 5.435309  |
| C | 0.713055  | 0.022217  | 3.890265  |
| H | 1.687599  | -0.124273 | 3.411380  |

Conformation 19.

Multiplicity: 3  
 Charge: 0  
 E(B97-3c) = -3893.559999889183 Hartree  
 E(M06/def2-TZVP) = -3893.292016440676 Hartree  
 E(PBE - D3(BJ)/def2-TZVP) = -3891.974521353261 Hartree  
 E(PBE0 - D3(BJ)/def2-TZVP) = -3892.235869461007 Hartree  
 E(PBEh-3c) = -3888.292285114661 Hartree  
 E(PM6) = 88.38083 Kcal/mol  
 E(PM7) = 51.12475 Kcal/mol  
 E( $\omega$ B97X-V/def2-TZVP) = -3895.849692308639 Hartree  
 E(GFN1-xTB) = -161.269486258523 Hartree  
 E(GFN2-xTB) = -160.182943194542 Hartree  
 E(GFN-FF) = -22.395905907788 Hartree

Coordinates:

|    |           |           |           |
|----|-----------|-----------|-----------|
| Co | 0.072310  | -0.206940 | 0.235800  |
| N  | -0.988378 | 1.414448  | 0.617536  |
| N  | 1.791638  | 0.666641  | 0.001662  |
| C  | -1.223241 | 4.002259  | 0.800963  |
| C  | -0.437344 | 2.635647  | 0.756076  |
| C  | 0.972101  | 2.802596  | 0.752072  |
| C  | 1.299783  | 3.809061  | 1.013280  |
| C  | 2.026508  | 1.942003  | 0.389678  |
| C  | 3.455242  | 2.581559  | 0.570517  |
| C  | -0.562125 | 5.018420  | 1.769189  |
| H  | -1.203344 | 5.920191  | 1.833875  |
| H  | 0.433672  | 5.365586  | 1.433514  |
| H  | -0.457936 | 4.607175  | 2.791754  |
| C  | -1.133660 | 4.594498  | -0.630191 |
| H  | -1.630234 | 5.586859  | -0.663194 |
| H  | -1.635261 | 3.942097  | -1.370708 |
| H  | -0.078997 | 4.719508  | -0.946250 |
| C  | -2.710922 | 3.947785  | 1.205164  |
| H  | -3.097840 | 4.986951  | 1.239547  |
| H  | -2.862572 | 3.500665  | 2.203658  |
| H  | -3.338823 | 3.387046  | 0.495278  |
| C  | 3.626823  | 2.826205  | 2.093739  |
| H  | 4.619038  | 3.280711  | 2.296755  |
| H  | 3.568797  | 1.873378  | 2.656783  |
| H  | 2.847444  | 3.500570  | 2.497204  |
| C  | 4.657997  | 1.733066  | 0.112040  |
| H  | 5.586480  | 2.257266  | 0.419265  |
| H  | 4.695737  | 1.598182  | -0.983518 |
| H  | 4.674504  | 0.732324  | 0.573474  |
| C  | 3.567387  | 3.939169  | -0.163402 |
| H  | 4.572414  | 4.373724  | 0.014887  |
| H  | 2.822287  | 4.682504  | 0.179276  |
| H  | 3.447053  | 3.818791  | -1.258287 |
| C  | -2.339283 | 1.102463  | 0.911622  |
| C  | -2.698211 | 0.765103  | 2.253296  |

|   |           |           |           |                                                         |           |           |           |
|---|-----------|-----------|-----------|---------------------------------------------------------|-----------|-----------|-----------|
| C | -4.052651 | 0.497484  | 2.532516  | Conformation 20.                                        |           |           |           |
| H | -4.335280 | 0.252373  | 3.569383  | Multiplicity: 3                                         |           |           |           |
| C | -5.037171 | 0.543732  | 1.536610  | Charge: 0                                               |           |           |           |
| H | -6.090152 | 0.343592  | 1.786157  | E(B97-3c) = -3893.569504779442 Hartree                  |           |           |           |
| C | -4.661799 | 0.826281  | 0.216948  | E(M06/def2-TZVP) = -3893.298385363765 Hartree           |           |           |           |
| H | -5.428228 | 0.841967  | -0.572396 | E(PBE - D3(BJ)/def2-TZVP) = -3891.984093131889 Hartree  |           |           |           |
| C | -3.326811 | 1.102416  | -0.120003 | E(PBE0 - D3(BJ)/def2-TZVP) = -3892.245171708628 Hartree |           |           |           |
| C | -1.711096 | 0.699771  | 3.422856  | E(PBEh-3c) = -3888.303727951105 Hartree                 |           |           |           |
| H | -2.277874 | 0.187423  | 4.231020  | E(PM6) = 80.46644 Kcal/mol                              |           |           |           |
| C | -0.473401 | -0.170009 | 3.168296  | E(PM7) = 36.81475 Kcal/mol                              |           |           |           |
| H | -0.773426 | -1.175459 | 2.828043  | E(ωB97X-V/def2-TZVP) = -3895.860776698953 Hartree       |           |           |           |
| H | 0.113701  | -0.294931 | 4.102066  | E(GFN1-xTB) = -161.275614469677 Hartree                 |           |           |           |
| H | 0.216194  | 0.286209  | 2.419129  | E(GFN2-xTB) = -160.190050598074 Hartree                 |           |           |           |
| C | -1.303994 | 2.071020  | 3.987528  | E(GFN-FF) = -22.406342276997 Hartree                    |           |           |           |
| H | -0.752177 | 1.939153  | 4.941341  |                                                         |           |           |           |
| H | -2.184377 | 2.712533  | 4.190405  | Coordinates:                                            |           |           |           |
| H | -0.631898 | 2.605704  | 3.289482  | Co                                                      | -0.073153 | -0.090218 | -0.207773 |
| C | -2.948549 | 1.449198  | -1.555189 | N                                                       | -0.032710 | 0.890436  | 1.500949  |
| H | -1.970486 | 1.502365  | -1.502365 | N                                                       | -1.710473 | -1.076021 | 0.050916  |
| C | -2.727622 | 0.185356  | -2.398487 | C                                                       | -1.011671 | 1.363790  | 3.881555  |
| H | -1.927052 | -0.432321 | -1.949872 | C                                                       | -1.009156 | 0.754402  | 2.422490  |
| H | -2.425011 | 0.446838  | -3.433216 | C                                                       | -2.153635 | -0.047294 | 2.174220  |
| H | -3.643087 | -0.438932 | -2.445372 | H                                                       | -2.895061 | -0.005188 | 2.971909  |
| C | -3.945996 | 2.398284  | -2.235140 | C                                                       | -2.522971 | -0.899450 | 1.114239  |
| H | -3.550909 | 2.730997  | -3.216947 | C                                                       | -3.967930 | -1.505945 | 1.263680  |
| H | -4.140908 | 3.301240  | -1.621984 | C                                                       | -2.405510 | 1.952481  | 4.232218  |
| H | -4.920854 | 1.905062  | -2.428858 | H                                                       | -2.351482 | 2.439974  | 5.226474  |
| C | 2.629897  | -0.022689 | -0.914115 | H                                                       | -3.207829 | 1.133333  | 4.190880  |
| C | 3.261841  | -1.250040 | -0.547923 | H                                                       | -2.718972 | 2.719947  | 3.497600  |
| C | 4.129259  | -1.862478 | -1.467633 | C                                                       | -0.722858 | 0.191622  | 4.853128  |
| H | 4.639566  | -2.794361 | -1.188671 | H                                                       | -0.743069 | 0.552977  | 5.902729  |
| C | 4.350670  | -1.318803 | -2.738404 | H                                                       | 0.275116  | -0.249122 | 4.666120  |
| H | 5.040274  | -1.813067 | -3.439218 | H                                                       | -1.473576 | -0.616050 | 4.748995  |
| C | 3.662725  | -0.161226 | -3.122870 | C                                                       | -0.008017 | 2.494865  | 4.190880  |
| H | 3.813600  | 0.241474  | -4.134636 | H                                                       | -0.195040 | 2.840295  | 5.228368  |
| C | 2.792356  | 0.499589  | -2.238032 | H                                                       | -0.131884 | 3.365485  | 3.522207  |
| C | 2.963579  | -1.901166 | 0.796799  | H                                                       | 1.045276  | 2.177740  | 4.133953  |
| H | 1.855581  | -1.789636 | 0.903283  | C                                                       | -4.961029 | -0.313481 | 1.243138  |
| C | 3.303658  | -3.392837 | 0.846708  | H                                                       | -6.001034 | -0.685437 | 1.352807  |
| H | 2.866891  | -3.946569 | -0.006101 | H                                                       | -4.898783 | 0.238497  | 0.284530  |
| H | 2.914682  | -3.846225 | 1.780002  | H                                                       | -4.764792 | 0.408930  | 2.058021  |
| H | 4.401726  | -3.556461 | 0.841324  | C                                                       | -4.421828 | -2.485696 | 0.164189  |
| C | 3.579364  | -1.178129 | 2.005290  | H                                                       | -5.486333 | -2.739831 | 0.346488  |
| H | 3.243133  | -0.127374 | 2.063312  | H                                                       | -3.847022 | -3.428668 | 0.165762  |
| H | 4.687991  | -1.191703 | 1.957616  | H                                                       | -4.352164 | -2.054013 | -0.848911 |
| H | 3.279989  | -1.681634 | 2.948724  | C                                                       | -4.118773 | -2.244735 | 2.615242  |
| C | 2.009384  | 1.730902  | -2.689733 | H                                                       | -5.150518 | -2.642063 | 2.706333  |
| H | 2.003718  | 2.450758  | -1.847369 | H                                                       | -3.938845 | -1.587721 | 3.487854  |
| C | 2.618560  | 2.458145  | -3.892871 | H                                                       | -3.423316 | -3.104665 | 2.690641  |
| H | 3.685092  | 2.710497  | -3.723405 | C                                                       | 1.088287  | 1.747820  | 1.650857  |
| H | 2.070968  | 3.403312  | -4.083455 | C                                                       | 1.030236  | 3.072722  | 1.115127  |
| H | 2.556770  | 1.855681  | -4.823086 | C                                                       | 2.099078  | 3.949055  | 1.376373  |
| C | 0.536687  | 1.376704  | -2.948935 | H                                                       | 2.053499  | 4.980950  | 1.000233  |
| H | 0.065261  | 0.970751  | -2.031116 | C                                                       | 3.226058  | 3.533817  | 2.100194  |
| H | 0.437243  | 0.623504  | -3.757797 | H                                                       | 4.043817  | 4.241016  | 2.306186  |
| H | -0.043480 | 2.275697  | -3.242498 | C                                                       | 3.320101  | 2.201573  | 2.518948  |
| P | -0.819367 | -2.295139 | 0.026847  | H                                                       | 4.226981  | 1.860627  | 3.040201  |
| C | -0.771255 | -3.515786 | 1.437677  | C                                                       | 2.271579  | 1.290365  | 2.302121  |
| C | -1.672987 | -4.599593 | 1.514330  | C                                                       | -0.147535 | 3.503994  | 0.247392  |
| H | -2.447547 | -4.720376 | 0.743448  | H                                                       | -0.383640 | 2.602589  | -0.365575 |
| C | -1.590090 | -5.526150 | 2.565105  | C                                                       | -1.417361 | 3.851819  | 1.042125  |
| H | -2.302356 | -6.364444 | 2.606654  | H                                                       | -1.767661 | 2.998598  | 1.649492  |
| C | -0.606682 | -5.387388 | 3.556910  | H                                                       | -2.239540 | 4.127918  | 0.349759  |
| H | -0.545002 | -6.113409 | 4.381824  | H                                                       | -1.240172 | 4.715714  | 1.716488  |
| C | 0.293935  | -4.313361 | 3.491608  | C                                                       | 0.197105  | 4.650697  | -0.709900 |
| H | 1.066822  | -4.189574 | 4.265691  | H                                                       | -0.639502 | 4.823036  | -1.415013 |
| C | 0.209256  | -3.386190 | 2.442789  | H                                                       | 1.102167  | 4.435417  | -1.311470 |
| H | 0.912629  | -2.543884 | 2.410533  | H                                                       | 0.361796  | 5.603016  | -0.163608 |
| C | 0.222019  | -3.147810 | -1.246983 | C                                                       | 2.408867  | -0.155035 | 2.764218  |
| C | 0.665264  | -2.377075 | -2.340560 | H                                                       | 1.384304  | -0.574047 | 2.823080  |
| H | 0.438079  | -1.301862 | -2.368871 | C                                                       | 3.175470  | -0.980451 | 1.717291  |
| C | 1.398471  | -2.967069 | -3.378849 | H                                                       | 2.642564  | -0.972160 | 0.747719  |
| H | 1.744764  | -2.346218 | -4.217672 | H                                                       | 3.282848  | -2.035509 | 2.042651  |
| C | 1.710723  | -4.334394 | -3.326662 | H                                                       | 4.187185  | -0.562938 | 1.537768  |
| H | 2.297412  | -4.798105 | -4.134302 | C                                                       | 3.055122  | -0.295170 | 4.150518  |
| C | 1.281059  | -5.107626 | -2.235954 | H                                                       | 3.001397  | -1.348192 | 4.495123  |
| H | 1.527657  | -6.179454 | -2.188059 | H                                                       | 2.552681  | 0.339648  | 4.907859  |
| C | 0.535707  | -4.520648 | -1.201079 | H                                                       | 4.128337  | -0.014603 | 4.134882  |
| H | 0.199387  | -5.132950 | -0.351597 | C                                                       | -1.737507 | -2.202812 | -0.809925 |
| C | -2.516700 | -2.650447 | -0.623430 | C                                                       | -1.397119 | -3.491570 | -0.287093 |
| C | -2.745878 | -3.274597 | -1.865924 | C                                                       | -1.475832 | -4.606480 | -1.139509 |
| H | -1.896520 | -3.584275 | -2.491570 | H                                                       | -1.241794 | -5.605941 | -0.746166 |
| C | -4.057787 | -3.500322 | -2.311114 | C                                                       | -1.859829 | -4.470775 | -2.480668 |
| H | -4.224994 | -3.985755 | -3.284963 | H                                                       | -1.935177 | -5.358065 | -3.127239 |
| C | -5.150452 | -3.115456 | -1.518055 | C                                                       | -2.104635 | -3.195459 | -3.003901 |
| H | -6.178492 | -3.295859 | -1.867613 | H                                                       | -2.348874 | -3.090541 | -4.070155 |
| C | -4.924270 | -2.495243 | -0.278585 | C                                                       | -2.025132 | -2.046391 | -2.200066 |
| H | -5.770873 | -2.177265 | 0.348015  | C                                                       | -0.929457 | -3.631680 | 1.159241  |
| C | -3.616510 | -2.254665 | 0.163302  | H                                                       | -1.608889 | -3.022235 | 1.789268  |
| H | -3.450541 | -1.750126 | 1.127610  | C                                                       | -0.974629 | -5.062308 | 1.703668  |
|   |           |           |           | H                                                       | -1.980540 | -5.515630 | 1.591836  |

|   |           |           |           |   |           |           |           |
|---|-----------|-----------|-----------|---|-----------|-----------|-----------|
| H | -0.717117 | -5.066987 | 2.781932  | H | 3.177992  | 4.174846  | 0.550559  |
| H | -0.245225 | -5.724189 | 1.191998  | C | 4.537473  | 1.704269  | -1.484346 |
| C | 0.471607  | -3.024998 | 1.335302  | H | 5.469549  | 2.295508  | -1.596625 |
| H | 0.467759  | -1.953187 | 1.040006  | H | 4.336584  | 1.208666  | -2.450944 |
| H | 1.225719  | -3.555335 | 0.718590  | H | 4.732352  | 0.914406  | -0.738747 |
| H | 0.799235  | -3.063973 | 2.393758  | C | 3.245053  | 3.705393  | -2.186678 |
| C | -2.182790 | -0.654946 | -2.796929 | H | 4.222191  | 4.191801  | -2.384710 |
| H | -1.384435 | -0.062586 | -2.284913 | H | 2.522547  | 4.504054  | -1.931859 |
| C | -1.917578 | -0.597419 | -4.303401 | H | 2.910270  | 3.234736  | -3.132414 |
| H | -0.970743 | -1.102149 | -4.573859 | C | -2.108773 | 1.217564  | 0.817374  |
| H | -1.847588 | 0.457115  | -4.638897 | C | -2.216485 | 0.982520  | 2.217242  |
| H | -2.740953 | -1.068781 | -4.880263 | C | -3.491398 | 0.688104  | 2.741042  |
| C | -3.516476 | 0.026740  | -2.456126 | H | -3.586736 | 0.492791  | 3.821528  |
| H | -3.658593 | 0.114875  | -1.363568 | C | -4.630607 | 0.632764  | 1.933698  |
| H | -4.373275 | -0.540022 | -2.876391 | H | -5.611178 | 0.402976  | 2.374907  |
| H | -3.547673 | 1.050271  | -2.885357 | C | -4.500989 | 0.827044  | 0.551765  |
| P | 1.486500  | 0.403082  | -1.729798 | H | -5.391850 | 0.754869  | -0.091189 |
| C | 1.475730  | -0.984483 | -2.962297 | C | -3.254972 | 1.102053  | -0.028796 |
| C | 1.268472  | -2.291580 | -2.477267 | C | -1.072843 | 1.060359  | 3.241184  |
| H | 1.053924  | -2.447265 | -1.409296 | H | -1.248117 | 0.184327  | 3.908531  |
| C | 1.321745  | -3.391564 | -3.345348 | C | 0.380425  | 0.944011  | 2.757737  |
| H | 1.148810  | -4.402189 | -2.948275 | H | 0.543087  | 0.027567  | 2.132787  |
| C | 1.565338  | -3.193790 | -4.713101 | H | 1.051102  | 0.816463  | 3.633839  |
| H | 1.595341  | -4.054276 | -5.398815 | H | 0.734955  | 1.826980  | 2.195800  |
| C | 1.762810  | -1.893321 | -5.206216 | C | -1.207845 | 2.313446  | 4.130764  |
| H | 1.949489  | -1.732467 | -6.279156 | H | -0.480155 | 2.282397  | 4.968010  |
| C | 1.724430  | -0.792925 | -4.336256 | H | -2.224773 | 2.402166  | 4.560261  |
| H | 1.883204  | 0.221949  | -4.729547 | H | -1.008789 | 3.234977  | 3.547824  |
| C | 3.306292  | 0.510152  | -1.386435 | C | -3.128412 | 1.284824  | -1.538654 |
| C | 4.194057  | -0.537491 | -1.707786 | H | -2.145756 | 1.762926  | -1.724045 |
| H | 3.827180  | -1.427944 | -2.238123 | C | -3.072346 | -0.072980 | -2.260810 |
| C | 5.549325  | -0.452492 | -1.353244 | H | -2.299560 | -0.721589 | -1.868641 |
| H | 6.229624  | -1.279442 | -1.608856 | H | -2.936173 | 0.056972  | -3.348731 |
| C | 6.037669  | 0.681233  | -0.685065 | H | -4.073773 | -0.603700 | -2.130770 |
| H | 7.101619  | 0.747172  | -0.410715 | C | -4.212139 | 2.195232  | -2.136476 |
| C | 5.158460  | 1.728872  | -0.367102 | H | -4.009987 | 2.383199  | -3.211002 |
| H | 5.521455  | 2.620410  | 0.166157  | H | -4.257571 | 3.175888  | -1.622173 |
| C | 3.801508  | 1.641165  | -0.705439 | H | -5.220009 | 1.735406  | -2.070773 |
| H | 3.120737  | 2.459349  | -0.429408 | C | 2.520778  | -0.351067 | -1.286972 |
| C | 1.220801  | 1.878533  | -2.825135 | C | 3.214891  | -1.387309 | -0.583773 |
| C | -0.101948 | 2.299143  | -3.071126 | C | 3.847576  | -2.395381 | -1.331863 |
| H | -0.934779 | 1.790773  | -2.563535 | H | 4.392493  | -3.191923 | -0.807926 |
| C | -0.366910 | 3.361548  | -3.945961 | C | 3.800527  | -2.413241 | -2.731975 |
| H | -1.407479 | 3.671576  | -4.127066 | H | 4.311288  | -3.210678 | -3.292288 |
| C | 0.691771  | 4.037441  | -4.572942 | C | 3.082332  | -1.421107 | -3.411443 |
| H | 0.486855  | 4.879352  | -5.251484 | H | 3.029680  | -1.451866 | -4.509174 |
| C | 2.013865  | 3.637954  | -4.322757 | C | 2.425169  | -0.390552 | -2.717644 |
| H | 2.850685  | 4.164546  | -4.806807 | C | 3.213911  | -1.427703 | 0.942895  |
| C | 2.278545  | 2.561514  | -3.460878 | H | 2.136951  | -1.329600 | 1.226745  |
| H | 3.317395  | 2.249461  | -3.279617 | C | 3.723608  | -2.747697 | 1.523949  |

Conformation 22.

Multiplicity: 3

Charge: 0

E(B97-3c) = -3893.560355371872 Hartree

E(M06/def2-TZVP) = -3893.289586107422 Hartree

E(PBE - D3(BJ)/def2-TZVP) = -3891.975409048667 Hartree

E(PBE0 - D3(BJ)/def2-TZVP) = -3892.235198999790 Hartree

E(PBEh-3c) = -3888.287746335652 Hartree

E(PM6) = 89.32346 Kcal/mol

E(PM7) = 46.70307 Kcal/mol

E( $\omega$ B97X-V/def2-TZVP) = -3895.848380704743 Hartree

E(GFN1-xTB) = -161.274026535109 Hartree

E(GFN2-xTB) = -160.183986600368 Hartree

E(GFN-FF) = -22.395614900441 Hartree

Coordinates:

|    |           |           |           |   |           |           |           |
|----|-----------|-----------|-----------|---|-----------|-----------|-----------|
| Co | 0.231587  | -0.151408 | 0.155394  | P | -0.774077 | -2.112437 | 0.663390  |
| N  | -0.845371 | 1.502766  | 0.250229  | C | 0.192724  | -3.185877 | 1.847956  |
| N  | 1.833264  | 0.658761  | -0.574761 | C | 0.515708  | -4.527643 | 1.561809  |
| C  | -1.094032 | 4.093513  | 0.238618  | H | 0.240706  | -4.961350 | 0.590017  |
| C  | -0.335625 | 2.726165  | 0.050867  | C | 1.184017  | -5.320332 | 2.508607  |
| C  | 1.009140  | 2.903777  | -0.378422 | H | 1.427007  | -6.365952 | 2.264677  |
| H  | 1.308200  | 3.948929  | -0.477163 | C | 1.540286  | -4.788143 | 3.756518  |
| C  | 2.030629  | 1.988090  | -0.698480 | H | 2.061236  | -5.412299 | 4.498203  |
| C  | 3.407923  | 2.660817  | -1.057056 | C | 1.237663  | -3.448524 | 4.046835  |
| C  | -0.251219 | 5.031763  | 1.141437  | H | 1.521048  | -3.014018 | 5.017766  |
| H  | -0.815024 | 5.967866  | 1.331893  | C | 0.579992  | -2.652863 | 3.097127  |
| H  | 0.718826  | 5.318028  | 0.694083  | H | 0.361607  | -1.603338 | 3.337545  |
| H  | -0.040489 | 4.556999  | 2.121016  | C | -0.833107 | -3.206241 | -0.835007 |
| C  | -1.246340 | 4.733318  | -1.163603 | C | 0.104270  | -2.940553 | -1.851777 |
| H  | -1.748247 | 5.720024  | -1.080548 | H | 0.800685  | -2.096016 | -1.741464 |
| H  | -1.864512 | 4.092949  | -1.824013 | C | 0.164792  | -3.744527 | -2.999564 |
| H  | -0.269209 | 4.884923  | -1.661854 | H | 0.911233  | -3.513769 | -3.774170 |
| C  | -2.496450 | 4.049283  | 0.876377  | C | -0.719925 | -4.823348 | -3.147279 |
| H  | -2.862989 | 5.092646  | 0.967261  | H | -0.681992 | -5.451553 | -4.050462 |
| H  | -2.494362 | 3.605218  | 1.887234  | C | -1.654360 | -5.100981 | -2.135107 |
| C  | -3.230403 | 3.490264  | 0.274375  | H | -2.346779 | -5.950293 | -2.241782 |
| C  | 3.894139  | 3.398706  | 0.218849  | C | -1.709016 | -4.303453 | -0.982064 |
| H  | 4.868621  | 3.891810  | 0.020313  | H | -2.437233 | -4.537308 | -0.191824 |
| H  | 4.037323  | 2.693045  | 1.060453  | C | -2.476993 | -2.371503 | 1.378890  |

|   |           |           |           |
|---|-----------|-----------|-----------|
| C | -3.597333 | -2.298938 | 0.525716  |
| H | -3.457328 | -2.076965 | -0.539506 |
| C | -4.889292 | -2.532501 | 1.016109  |
| H | -5.746265 | -2.479546 | 0.327192  |
| C | -5.091092 | -2.818467 | 2.374166  |
| H | -6.105889 | -3.000694 | 2.759295  |
| C | -3.986070 | -2.868762 | 3.236968  |
| H | -4.127679 | -3.092379 | 4.305586  |
| C | -2.690489 | -2.652716 | 2.744305  |
| H | -1.838557 | -2.731191 | 3.433810  |

Conformation 23.

Multiplicity: 3

Charge: 0

E(B97-3c) = -3893.565328902517 Hartree  
E(M06/def2-TZVP) = -3893.296543162907 Hartree  
E(PBE - D3(BJ)/def2-TZVP) = -3891.979858930894 Hartree  
E(PBE0 - D3(BJ)/def2-TZVP) = -3892.242067120452 Hartree  
E(PBEh-3c) = -3888.300130612013 Hartree  
E(PM6) = 82.56325 Kcal/mol  
E(PM7) = 41.17791 Kcal/mol  
E( $\omega$ B97X-V/def2-TZVP) = -3895.861757008122 Hartree  
E(GFN1-xTB) = -161.276371334800 Hartree  
E(GFN2-xTB) = -160.190617326721 Hartree  
E(GFN-FF) = -22.400222107330 Hartree

Coordinates:

|    |           |           |           |
|----|-----------|-----------|-----------|
| Co | 0.238553  | 0.074257  | -0.119211 |
| N  | -0.898731 | -1.251626 | 0.853661  |
| N  | 0.761726  | -1.133172 | -1.542082 |
| C  | -1.857502 | -3.660229 | 1.222990  |
| C  | -1.023874 | -2.540483 | 0.479085  |
| C  | -0.363194 | -3.050223 | -0.663371 |
| H  | -0.531714 | -4.114296 | -0.837000 |
| C  | 0.439522  | -2.435116 | -1.645641 |
| C  | 0.865666  | -3.410455 | -2.803028 |
| C  | -2.862423 | -4.293041 | 0.225907  |
| H  | -3.448343 | -5.083787 | 0.738157  |
| H  | -2.372141 | -4.756181 | -0.650730 |
| H  | -3.577627 | -3.534628 | -0.151436 |
| C  | -0.861786 | -4.748538 | 1.701668  |
| H  | -1.414543 | -5.572306 | 2.199361  |
| H  | -0.142415 | -4.333148 | 2.436483  |
| H  | -0.275437 | -5.184821 | 0.870978  |
| C  | -2.689930 | -3.261673 | 2.459698  |
| H  | -3.175657 | -4.181295 | 2.846837  |
| H  | -3.489107 | -2.536109 | 2.228410  |
| H  | -2.083403 | -2.841540 | 3.279727  |
| C  | -0.419175 | -3.963504 | -3.469691 |
| H  | -0.146668 | -4.660652 | -4.289086 |
| H  | -1.019726 | -3.140195 | -3.906433 |
| H  | -1.067867 | -4.511178 | -2.760555 |
| C  | 1.734584  | -2.845936 | -3.945051 |
| H  | 1.908236  | -3.666278 | -4.671872 |
| H  | 2.723677  | -2.494546 | -3.603282 |
| H  | 1.254822  | -2.015042 | -4.491262 |
| C  | 1.675299  | -4.579423 | -2.187484 |
| H  | 1.974384  | -5.289866 | -2.985964 |
| H  | 1.104905  | -5.147824 | -1.428128 |
| H  | 2.600453  | -4.203482 | -1.705026 |
| C  | -1.656081 | -0.660338 | 1.894057  |
| C  | -2.979563 | -0.197389 | 1.622149  |
| C  | -3.716151 | 0.385235  | 2.667386  |
| H  | -4.743669 | 0.726892  | 2.476618  |
| C  | -3.158883 | 0.551863  | 3.943880  |
| H  | -3.743276 | 1.031142  | 4.744304  |
| C  | -1.867246 | 0.069280  | 4.205646  |
| H  | -1.457935 | 0.150502  | 5.223079  |
| C  | -1.113198 | -0.578508 | 3.211062  |
| C  | -3.578780 | -0.395058 | 0.233326  |
| H  | -3.204178 | -1.372740 | -0.136363 |
| C  | -5.109795 | -0.460329 | 0.220196  |
| H  | -5.496124 | -1.220164 | 0.929762  |
| H  | -5.472730 | -0.722555 | -0.794376 |
| H  | -5.565126 | 0.516635  | 0.484702  |
| C  | -3.074630 | 0.662208  | -0.760860 |
| H  | -3.362026 | 0.398108  | -1.798450 |
| H  | -1.966846 | 0.742412  | -0.721572 |
| H  | -3.478084 | 1.667125  | -0.527035 |
| C  | 0.174239  | -1.329716 | 3.544612  |
| H  | 0.168336  | -2.228536 | 2.892048  |
| C  | 1.445629  | -0.551482 | 3.191046  |
| H  | 1.391114  | -0.170768 | 2.151954  |
| H  | 2.343067  | -1.197741 | 3.279511  |
| H  | 1.577198  | 0.318103  | 3.862347  |
| C  | 0.232173  | -1.818696 | 4.997791  |
| H  | 1.106113  | -2.486260 | 5.142657  |
| H  | -0.680223 | -2.380962 | 5.284129  |
| H  | 0.349914  | -0.974727 | 5.709084  |
| C  | 1.551111  | -0.413399 | -2.471909 |
| C  | 0.921976  | 0.325487  | -3.515316 |

|   |           |           |           |
|---|-----------|-----------|-----------|
| C | 1.732131  | 1.015086  | -4.435297 |
| H | 1.256953  | 1.578472  | -5.253453 |
| C | 3.128438  | 0.999284  | -4.328873 |
| H | 3.745056  | 1.536851  | -5.065257 |
| C | 3.737385  | 0.311170  | -3.267808 |
| H | 4.833247  | 0.322186  | -3.176108 |
| C | 2.972689  | -0.399119 | -2.329362 |
| C | -0.595251 | 0.400559  | -3.623398 |
| H | -1.007061 | -0.247897 | -2.822711 |
| C | -1.073906 | 1.835575  | -3.349687 |
| H | -0.761345 | 2.166770  | -2.340024 |
| H | -2.178948 | 1.907123  | -3.398834 |
| H | -0.650900 | 2.552444  | -4.083333 |
| C | -1.119550 | -0.122491 | -4.969999 |
| H | -0.802898 | -1.169053 | -5.152051 |
| H | -0.753627 | 0.490626  | -5.819750 |
| H | -2.228223 | -0.093163 | -4.994002 |
| C | 3.619541  | -1.116309 | -1.152810 |
| H | 2.964935  | -1.975859 | -0.899187 |
| C | 5.018871  | -1.668666 | -1.444766 |
| H | 5.020352  | -2.320337 | -2.342065 |
| H | 5.381860  | -2.268660 | -0.586105 |
| H | 5.761658  | -0.861074 | -1.609994 |
| C | 3.627343  | -0.182863 | 0.068484  |
| H | 2.597422  | 0.190807  | 0.272736  |
| H | 4.266671  | 0.705011  | -0.117244 |
| H | 3.988275  | -0.698359 | 0.981351  |
| P | 0.384851  | 2.210722  | 0.664842  |
| C | -1.174761 | 3.210920  | 0.642683  |
| C | -1.432455 | 4.134352  | -0.394277 |
| H | -0.667657 | 4.329368  | -1.158819 |
| C | -2.657352 | 4.814978  | -0.456074 |
| H | -2.836949 | 5.532586  | -1.271174 |
| C | -3.642875 | 4.594725  | 0.519582  |
| H | -4.599679 | 5.136782  | 0.475674  |
| C | -3.399506 | 3.668995  | 1.545309  |
| H | -4.165400 | 3.463933  | 2.308906  |
| C | -2.184215 | 2.971121  | 1.595494  |
| H | -2.044354 | 2.210472  | 2.372153  |
| H | 1.489841  | 3.354604  | -0.306649 |
| C | 1.719592  | 4.663006  | 0.178523  |
| H | 1.251118  | 4.984364  | 1.120688  |
| C | 2.536493  | 5.549205  | -0.532326 |
| H | 2.707253  | 6.565048  | -0.144447 |
| C | 3.138871  | 5.142148  | -1.736844 |
| H | 3.781646  | 5.839925  | -2.295550 |
| C | 2.917501  | 3.846749  | -2.221257 |
| H | 3.381426  | 3.509389  | -3.159626 |
| C | 2.095349  | 2.955669  | -1.507426 |
| H | 1.926025  | 1.943434  | -1.892880 |
| C | 1.143286  | 2.568397  | 2.333036  |
| C | 2.550014  | 2.453602  | 2.415705  |
| H | 3.132568  | 2.219824  | 1.512831  |
| C | 3.217208  | 2.643342  | 3.631778  |
| H | 4.313346  | 2.550658  | 3.670504  |
| C | 2.491886  | 2.955360  | 4.793725  |
| H | 3.013287  | 3.107704  | 5.750555  |
| C | 1.097360  | 3.079018  | 4.720289  |
| H | 0.516087  | 3.334055  | 5.619575  |
| C | 0.426463  | 2.888798  | 3.500415  |
| H | -0.662965 | 3.007532  | 3.472853  |

Conformation 3.

Multiplicity: 3

Charge: 0

E(B97-3c) = -3893.562220761271 Hartree  
E(M06/def2-TZVP) = -3893.294167850594 Hartree  
E(PBE - D3(BJ)/def2-TZVP) = -3891.977074941923 Hartree  
E(PBE0 - D3(BJ)/def2-TZVP) = -3892.238360477379 Hartree  
E(PBEh-3c) = -3888.297655951989 Hartree  
E(PM6) = 81.61264 Kcal/mol  
E(PM7) = 38.74997 Kcal/mol  
E( $\omega$ B97X-V/def2-TZVP) = -3895.855103885208 Hartree  
E(GFN1-xTB) = -161.271953209007 Hartree  
E(GFN2-xTB) = -160.184795360752 Hartree  
E(GFN-FF) = -22.403775828697 Hartree

Coordinates:

|    |           |           |           |
|----|-----------|-----------|-----------|
| Co | 0.051448  | -0.208423 | 0.187197  |
| N  | -1.017070 | 0.937339  | -1.016851 |
| N  | -1.040254 | -0.025945 | 1.764722  |
| C  | -3.038280 | 2.546004  | -1.452888 |
| C  | -2.177724 | 1.507303  | -0.627000 |
| C  | -2.722249 | 1.271390  | 0.659974  |
| H  | -3.687531 | 1.750947  | 0.823237  |
| C  | -2.232547 | 0.597358  | 1.798263  |
| C  | -3.204093 | 0.659900  | 3.035353  |
| C  | -4.549232 | 2.194113  | -1.388202 |
| H  | -5.113638 | 2.921549  | -2.006041 |
| H  | -4.977153 | 2.242492  | -0.369272 |
| H  | -4.749550 | 1.183743  | -1.794420 |

|   |           |           |           |                                                         |           |           |           |
|---|-----------|-----------|-----------|---------------------------------------------------------|-----------|-----------|-----------|
| C | -2.835304 | 3.924545  | -0.774261 | C                                                       | 3.557311  | -3.165919 | 0.619972  |
| H | -3.398331 | 4.707666  | -1.324083 | H                                                       | 3.496891  | -3.762201 | -0.301888 |
| H | -1.767928 | 4.215277  | -0.765534 | C                                                       | 4.334286  | -3.623091 | 1.694611  |
| H | -3.188889 | 3.915491  | 0.275223  | H                                                       | 4.876789  | -4.576980 | 1.605977  |
| C | -2.727711 | 2.702056  | -2.956201 | C                                                       | 4.422259  | -2.870156 | 2.877059  |
| H | -3.465280 | 3.410902  | -3.385553 | H                                                       | 5.032297  | -3.232670 | 3.718579  |
| H | -2.819236 | 1.749754  | -3.508174 | C                                                       | 3.723950  | -1.657812 | 2.983173  |
| H | -1.723864 | 3.107004  | -3.159265 | H                                                       | 3.772117  | -1.063026 | 3.906728  |
| C | -4.591916 | 0.127742  | 2.590920  | C                                                       | 2.934603  | -1.207183 | 1.915147  |
| H | -5.288080 | 0.136273  | 3.454905  | H                                                       | 2.365031  | -0.273346 | 2.011970  |
| H | -4.520452 | -0.915336 | 2.222317  | C                                                       | 3.144616  | -0.424475 | -1.659683 |
| H | -5.048346 | 0.733866  | 1.786161  | C                                                       | 4.378080  | -0.048690 | -1.087780 |
| C | -2.808649 | -0.163036 | 4.278300  | H                                                       | 4.601521  | -0.308041 | -0.042725 |
| H | -3.628012 | -0.074774 | 5.021308  | C                                                       | 5.325725  | 0.655389  | -1.846387 |
| H | -1.882082 | 0.194265  | 4.760175  | H                                                       | 6.283337  | 0.943790  | -1.386216 |
| H | -2.683553 | -1.237456 | 4.052517  | C                                                       | 5.060797  | 0.981178  | -3.185918 |
| C | -3.356804 | 2.130934  | 3.491190  | H                                                       | 5.807804  | 1.528719  | -3.780713 |
| H | -4.087022 | 2.195389  | 4.324536  | C                                                       | 3.835400  | 0.606782  | -3.760114 |
| H | -3.714137 | 2.787737  | 2.674459  | H                                                       | 3.606618  | 0.864164  | -4.805379 |
| H | -2.394413 | 2.539359  | 3.856750  | C                                                       | 2.878609  | -0.080459 | -3.001181 |
| C | -0.467612 | 1.066270  | -2.319459 | H                                                       | 1.916380  | -0.351003 | -3.459711 |
| C | 0.392600  | 2.154855  | -2.649746 | Conformation 30.                                        |           |           |           |
| C | 0.835010  | 2.289996  | -3.978023 | Multiplicity: 3                                         |           |           |           |
| H | 1.483129  | 3.139703  | -4.241575 | Charge: 0                                               |           |           |           |
| C | 0.461658  | 1.375602  | -4.968737 | E(B97-3c) = -3893.563746418426 Hartree                  |           |           |           |
| H | 0.795684  | 1.512251  | -6.008452 | E(M06/def2-TZVP) = -3893.294304769163 Hartree           |           |           |           |
| C | -0.309301 | 0.258089  | -4.615607 | E(PBE - D3(BJ)/def2-TZVP) = -3891.978335656992 Hartree  |           |           |           |
| H | -0.559683 | -0.485439 | -5.385402 | E(PBE0 - D3(BJ)/def2-TZVP) = -3892.238782841677 Hartree |           |           |           |
| C | -0.768554 | 0.068015  | -3.299978 | E(PBEh-3c) = -3888.297791553374 Hartree                 |           |           |           |
| C | 0.831614  | 3.179235  | -1.609382 | E(PM6) = 84.72964 Kcal/mol                              |           |           |           |
| H | 0.211082  | 3.010496  | -0.705347 | E(PM7) = 39.87404 Kcal/mol                              |           |           |           |
| C | 2.301389  | 2.955684  | -1.216142 | E(ωB97X-V/def2-TZVP) = -3895.855128730957 Hartree       |           |           |           |
| H | 2.455552  | 1.944233  | -0.799359 | E(GFN1-xTB) = -161.270180153085 Hartree                 |           |           |           |
| H | 2.627592  | 3.698473  | -0.459492 | E(GFN2-xTB) = -160.182244923714 Hartree                 |           |           |           |
| H | 2.967556  | 3.051294  | -2.097703 | E(GFN-FF) = -22.399762225851 Hartree                    |           |           |           |
| C | 0.621433  | 4.631457  | -2.071499 | Coordinates:                                            |           |           |           |
| H | 0.820474  | 5.335304  | -1.237342 | Co                                                      | -0.313747 | 0.051608  | -0.068013 |
| H | -0.410580 | 4.811222  | -2.431362 | N                                                       | 1.147533  | -0.859228 | 0.924850  |
| H | 1.314222  | 4.899886  | -2.895623 | N                                                       | -1.020207 | 1.135697  | 1.355752  |
| C | -1.538120 | -1.190266 | -2.910220 | C                                                       | 2.307882  | -1.407810 | 3.204964  |
| H | -1.145266 | -1.448691 | -1.898566 | C                                                       | 1.369049  | -0.586641 | 2.229665  |
| C | -3.054164 | -0.984405 | -2.753279 | C                                                       | 0.654220  | 0.428840  | 2.916019  |
| H | -3.290976 | -0.251612 | -1.962510 | H                                                       | 1.001424  | 0.587335  | 3.934772  |
| H | -3.541040 | -1.941537 | -2.473187 | C                                                       | -0.452074 | 1.234629  | 2.573956  |
| H | -3.511418 | -0.639234 | -3.704167 | C                                                       | -0.859322 | 2.268446  | 3.682579  |
| C | -1.277371 | -2.367921 | -3.855521 | C                                                       | 3.080707  | -0.475993 | 4.178336  |
| H | -1.727294 | -3.293291 | -3.446670 | H                                                       | 3.774357  | -1.088060 | 4.789201  |
| H | -0.196380 | -2.555811 | -4.004640 | H                                                       | 2.428364  | 0.061483  | 4.892016  |
| H | -1.739381 | -2.195123 | -4.850138 | H                                                       | 3.687170  | 0.276207  | 3.636873  |
| C | -0.301303 | -0.413506 | 2.913043  | C                                                       | 1.354560  | -2.296222 | 4.045826  |
| C | 0.386321  | 0.623298  | 3.630968  | H                                                       | 1.937130  | -2.933094 | 4.744386  |
| C | 1.103318  | 0.297168  | 4.790942  | H                                                       | 0.754143  | -2.963216 | 3.398547  |
| H | 1.622761  | 1.089754  | 5.349018  | H                                                       | 0.648369  | -1.681802 | 4.637947  |
| C | 1.148074  | -1.023472 | 5.261510  | C                                                       | 3.382562  | -2.321856 | 2.578855  |
| H | 1.691705  | -1.267150 | 6.186705  | H                                                       | 3.972129  | -2.770493 | 3.404558  |
| C | 0.497893  | -2.027199 | 4.541473  | H                                                       | 4.084352  | -1.772260 | 1.927116  |
| H | 0.532181  | -3.063133 | 4.914694  | H                                                       | 2.963875  | -3.150678 | 1.987210  |
| C | -0.223567 | -1.764191 | 3.357967  | C                                                       | 0.178076  | 3.416106  | 3.597217  |
| C | 0.359948  | 2.056730  | 3.109448  | H                                                       | -0.055226 | 4.207642  | 4.340424  |
| H | -0.619047 | 2.211997  | 2.614701  | H                                                       | 0.176268  | 3.879850  | 2.592292  |
| C | 0.492606  | 3.121486  | 4.204720  | H                                                       | 1.203316  | 3.045132  | 3.793884  |
| H | -0.249155 | 2.969977  | 5.014940  | C                                                       | -2.273684 | 2.871193  | 3.564287  |
| H | 0.332105  | 4.131711  | 3.776910  | H                                                       | -2.439796 | 3.545349  | 4.429508  |
| H | 1.501466  | 3.122581  | 4.667099  | H                                                       | -3.062585 | 2.097379  | 3.583688  |
| C | 1.428290  | 2.259450  | 2.025149  | H                                                       | -2.420826 | 3.466360  | 2.649269  |
| H | 1.312127  | 1.522835  | 1.197287  | C                                                       | -0.785577 | 1.644597  | 5.100064  |
| H | 2.452331  | 2.133304  | 2.433897  | H                                                       | -1.161101 | 2.379738  | 5.840354  |
| H | 1.355745  | 3.268976  | 1.574913  | H                                                       | 0.242284  | 1.378079  | 5.411774  |
| C | -0.864247 | -2.995581 | 2.701005  | H                                                       | -1.412853 | 0.735344  | 5.175978  |
| H | -1.376982 | -3.528260 | 3.535186  | C                                                       | 1.953926  | -1.750931 | 0.164839  |
| C | -1.930086 | -2.784817 | 1.616947  | C                                                       | 1.614512  | -3.130232 | 0.039714  |
| H | -2.787168 | -2.185717 | 1.974785  | C                                                       | 2.491733  | -3.989713 | -0.645279 |
| H | -2.315758 | -3.771057 | 1.286290  | H                                                       | 2.237109  | -5.057770 | -0.724644 |
| H | -1.530819 | -2.254199 | 0.729973  | C                                                       | 3.681519  | -3.519381 | -1.209905 |
| C | 0.244773  | -3.938160 | 2.191097  | H                                                       | 4.371474  | -4.212409 | -1.715403 |
| H | 0.959785  | -4.207933 | 2.992300  | C                                                       | 3.969089  | -2.148427 | -1.153719 |
| H | 0.834286  | -3.449029 | 1.394737  | H                                                       | 4.881459  | -1.772266 | -1.637412 |
| H | -0.185650 | -4.874338 | 1.779933  | C                                                       | 3.117467  | -1.242349 | -0.495358 |
| P | 1.823115  | -1.266035 | -0.671034 | C                                                       | 0.340443  | -3.708447 | 0.641401  |
| C | 1.537628  | -2.813806 | -1.659140 | H                                                       | -0.081409 | -2.934789 | 1.313489  |
| C | 0.421657  | -3.603050 | -1.318098 | C                                                       | -0.692614 | -3.989779 | -0.462049 |
| H | -0.279736 | -3.241241 | -0.554215 | H                                                       | -0.946841 | -3.067644 | -1.015111 |
| C | 0.196970  | -4.837625 | -1.941507 | H                                                       | -1.626347 | -4.411693 | -0.037076 |
| H | -0.677090 | -5.442023 | -1.654352 | H                                                       | -0.297026 | -4.715771 | -1.201919 |
| C | 1.072416  | -5.289264 | -2.941403 | C                                                       | 0.584995  | -4.973766 | 1.480213  |
| C | 0.891962  | -6.252508 | -3.442291 | H                                                       | -0.346728 | -5.272570 | 2.003635  |
| C | 2.175214  | -4.500420 | -3.305100 | H                                                       | 1.371874  | -4.822577 | 2.245316  |
| H | 2.864460  | -4.844668 | -4.091488 | H                                                       | 0.892123  | -5.831850 | 0.847450  |
| C | 2.413714  | -3.274042 | -2.663537 | C                                                       | 3.417409  | 0.253651  | -0.513646 |
| H | 3.291564  | -2.674193 | -2.944332 |                                                         |           |           |           |
| C | 2.847795  | -1.951783 | 0.722705  |                                                         |           |           |           |



|   |           |           |           |   |           |           |           |
|---|-----------|-----------|-----------|---|-----------|-----------|-----------|
| H | 2.420365  | 0.739892  | -0.600401 | N | -0.839855 | -1.804060 | -0.282236 |
| C | 4.059045  | 0.785009  | 0.778945  | C | -1.869082 | 1.176890  | -3.605762 |
| H | 3.397921  | 0.648403  | 1.652384  | C | -1.377925 | 0.418189  | -2.309043 |
| H | 4.261710  | 1.872133  | 0.684549  | C | -1.839604 | -0.920775 | -2.269864 |
| H | 5.026163  | 0.279214  | 0.982769  | H | -2.480720 | -1.190465 | -3.110811 |
| C | 4.272872  | 0.675909  | -1.713661 | C | -1.668221 | -1.960302 | -1.331094 |
| H | 4.330887  | 1.779945  | -1.770583 | C | -2.525565 | -3.237008 | -1.651318 |
| H | 3.857805  | 0.312294  | -2.673469 | C | -1.225184 | 0.426258  | -4.821687 |
| H | 5.313615  | 0.300423  | -1.621859 | H | -1.562778 | 0.940334  | -5.764798 |
| C | -2.314182 | 1.586366  | 0.980224  | H | -1.485424 | -0.612354 | -4.868668 |
| C | -2.496872 | 2.822506  | 0.285695  | H | -0.119948 | 0.536682  | -4.781250 |
| C | -3.800618 | 3.242949  | -0.031320 | C | -3.412480 | 1.082595  | -3.716610 |
| H | -3.937656 | 4.202714  | -0.552968 | H | -3.753228 | 1.636924  | -4.615119 |
| C | -4.920643 | 2.474905  | 0.301429  | H | -3.903318 | 1.539954  | -2.833742 |
| H | -5.934438 | 2.830004  | 0.061926  | H | -3.783490 | 0.044588  | -3.808700 |
| C | -4.730464 | 1.230188  | 0.915066  | C | -1.532000 | 2.674763  | -3.748868 |
| H | -5.601551 | 0.595497  | 1.145715  | H | -1.895427 | 3.008381  | -4.742930 |
| C | -3.449747 | 0.752479  | 1.247806  | H | -0.451628 | 2.888256  | -3.703825 |
| C | -1.326578 | 3.709857  | -0.122712 | H | -2.027411 | 3.301800  | -2.987370 |
| H | -0.398762 | 3.184410  | 0.191715  | C | -2.094127 | -3.785097 | -3.033869 |
| C | -1.299181 | 3.898794  | -1.649442 | H | -2.702048 | -4.676417 | -3.294363 |
| H | -1.316098 | 2.930031  | -2.180967 | H | -1.029638 | -4.095941 | -3.015944 |
| H | -0.394630 | 4.456215  | -1.966796 | H | -2.214856 | -3.044506 | -3.847141 |
| H | -2.181778 | 4.477931  | -1.991359 | C | -2.445451 | -4.423791 | -0.670747 |
| C | -1.354631 | 5.086055  | 0.566973  | H | -3.136060 | -5.210943 | -1.037462 |
| H | -1.380533 | 5.006579  | 1.669959  | H | -2.757540 | -4.158628 | 0.354585  |
| H | -2.245165 | 5.669654  | 0.254062  | H | -1.437812 | -4.870287 | -0.608496 |
| H | -0.457379 | 5.677542  | 0.290699  | C | -4.015854 | -2.813174 | -1.692700 |
| C | -3.365640 | -0.669221 | 1.806302  | H | -4.654430 | -3.695124 | -1.907249 |
| H | -4.415655 | -1.034559 | 1.785472  | H | -4.222984 | -2.046283 | -2.462736 |
| C | -2.571417 | -1.609988 | 0.891140  | H | -4.328041 | -2.396057 | -0.713622 |
| H | -2.938824 | -1.594480 | -0.152538 | C | -0.223366 | 2.279065  | -1.243377 |
| H | -2.639269 | -2.656701 | 1.248423  | C | 1.056155  | 2.755210  | -1.650557 |
| H | -1.479844 | -1.363247 | 0.905704  | C | 1.336805  | 4.126857  | -1.467924 |
| C | -2.892017 | -0.812301 | 3.262260  | H | 2.332758  | 4.499505  | -1.756465 |
| H | -3.429162 | -0.119796 | 3.940358  | C | 0.388400  | 5.021877  | -0.961764 |
| H | -1.804606 | -0.627189 | 3.359437  | H | 0.634111  | 6.089098  | -0.854514 |
| H | -3.086162 | -1.845891 | 3.616975  | C | -0.875520 | 4.542961  | -0.582672 |
| P | -0.237454 | -0.152440 | -2.285693 | H | -1.621361 | 5.243842  | -0.181222 |
| C | 1.031797  | 0.868325  | -3.175744 | C | -1.191696 | 3.180891  | -0.686808 |
| C | 1.394761  | 2.096317  | -2.588571 | C | 2.152638  | 1.944732  | -2.358698 |
| H | 1.005073  | 2.348802  | -1.590920 | H | 3.091974  | 2.242000  | -1.844194 |
| C | 2.241912  | 2.987818  | -3.260349 | C | 2.094211  | 0.414720  | -2.296793 |
| H | 2.505801  | 3.948220  | -2.792042 | H | 1.956435  | 0.062870  | -1.253240 |
| C | 2.763565  | 2.648759  | -4.519011 | H | 3.055569  | -0.005982 | -2.656353 |
| H | 3.435866  | 3.343403  | -5.044728 | H | 1.277984  | -0.012048 | -2.909280 |
| C | 2.433552  | 1.413728  | -5.098856 | C | 2.310694  | 2.389850  | -3.828596 |
| H | 2.849019  | 1.135021  | -6.079708 | H | 3.214247  | 1.925993  | -4.275462 |
| C | 1.566027  | 0.529987  | -4.436331 | H | 2.411037  | 3.489203  | -3.920477 |
| H | 1.298716  | -0.428762 | -4.904574 | H | 1.440265  | 2.081466  | -4.442346 |
| C | -1.792226 | 0.541870  | -3.047074 | C | -2.543798 | 2.642419  | -0.230122 |
| C | -1.823680 | 1.076315  | -4.352289 | H | -2.847338 | 1.867423  | -0.963478 |
| H | -0.901580 | 1.125361  | -4.949884 | C | -2.414048 | 1.926674  | 1.123813  |
| C | -3.026459 | 1.554936  | -4.891718 | H | -1.581078 | 1.193891  | 1.089795  |
| H | -3.036244 | 1.975250  | -5.909324 | H | -3.343835 | 1.377728  | 1.376695  |
| C | -4.212821 | 1.499278  | -4.140823 | H | -2.186055 | 2.639082  | 1.941290  |
| H | -5.154235 | 1.877391  | -4.567218 | C | -3.659894 | 3.690527  | -0.192800 |
| C | -4.189738 | 0.967958  | -2.843436 | H | -4.631079 | 3.204577  | 0.031223  |
| H | -5.104096 | 0.930088  | -2.234097 | H | -3.759605 | 4.222110  | -1.161279 |
| C | -2.984261 | 0.500185  | -2.299833 | H | -3.490543 | 4.451607  | 0.597274  |
| H | -2.964435 | 0.117154  | -1.271020 | C | -0.576269 | -2.779574 | 0.713389  |
| C | -0.144594 | -1.770292 | -3.183775 | C | 0.462929  | -3.738189 | 0.509018  |
| C | -1.293264 | -2.372575 | -3.738846 | C | 0.711732  | -4.689228 | 1.511897  |
| H | -2.257728 | -1.844511 | -3.711130 | H | 1.503704  | -5.438119 | 1.361909  |
| C | -1.212755 | -3.641698 | -4.331721 | C | -0.035609 | -4.707724 | 2.699138  |
| H | -2.117878 | -4.097999 | -4.761226 | H | 0.164807  | -5.470756 | 3.466661  |
| C | 0.014618  | -4.320911 | -4.387902 | C | -1.027511 | -3.740942 | 2.907361  |
| H | 0.077123  | -5.313781 | -4.858409 | H | -1.598096 | -3.742776 | 3.849174  |
| C | 1.160730  | -3.726163 | -3.836468 | C | -1.313279 | -2.767716 | 1.933537  |
| H | 2.129297  | -4.248078 | -3.860439 | C | 1.316130  | -3.681703 | -0.750348 |
| C | 1.081489  | -2.466152 | -3.228567 | H | 0.709901  | -3.179834 | -1.532025 |
| H | 1.983972  | -2.024504 | -2.782065 | C | 2.537055  | -2.783317 | -0.488601 |
| H |           |           |           | H | 2.195818  | -1.787133 | -0.132938 |
| H |           |           |           | H | 3.138970  | -2.632697 | -1.408279 |
| H |           |           |           | H | 3.189326  | -3.212216 | 0.299908  |
| C |           |           |           | C | 1.730170  | -5.056783 | -1.287788 |
| H |           |           |           | H | 0.850858  | -5.714326 | -1.443821 |
| H |           |           |           | H | 2.426738  | -5.580443 | -0.600861 |
| H |           |           |           | H | 2.253805  | -4.948747 | -2.259258 |
| H |           |           |           | H | -2.361288 | -1.697427 | 2.205504  |
| C |           |           |           | H | -2.482533 | -1.120768 | 1.265711  |
| C |           |           |           | C | -3.732534 | -2.277935 | 2.581341  |
| H |           |           |           | H | -4.112154 | -2.968364 | 1.801422  |
| H |           |           |           | H | -4.475654 | -1.463649 | 2.705691  |
| H |           |           |           | H | -3.695478 | -2.838940 | 3.538320  |
| C |           |           |           | C | -1.846046 | -0.723322 | 3.278269  |
| H |           |           |           | H | -0.900929 | -0.249576 | 2.948010  |
| H |           |           |           | H | -1.643136 | -1.244803 | 4.236612  |
| H |           |           |           | H | -2.575798 | 0.087960  | 3.472868  |
| P |           |           |           | P | 1.613228  | 0.811292  | 1.526097  |
| C |           |           |           | C | 2.401526  | -0.315754 | 2.778152  |

Conformation 31.  
Multiplicity: 3  
Charge: 0  
E(B97-3c) = -3893.567685664138 Hartree  
E(M06/def2-TZVP) = -3893.299025540857 Hartree  
E(PBE - D3(BJ)/def2-TZVP) = -3891.981626915445 Hartree  
E(PBE0 - D3(BJ)/def2-TZVP) = -3892.243500924945 Hartree  
E(PBEh-3c) = -3888.300583467721 Hartree  
E(PM6) = 82.74895 Kcal/mol  
E(PM7) = 38.42901 Kcal/mol  
E( $\omega$ B97X-V/def2-TZVP) = -3895.860393132127 Hartree  
E(GFN1-xTB) = -161.277079756721 Hartree  
E(GFN2-xTB) = -160.190653523218 Hartree  
E(GFN-FF) = -22.404095107430 Hartree

Coordinates:  
Co 0.173462 -0.209516 0.122077  
N -0.571785 0.912887 -1.354090

|   |           |           |           |
|---|-----------|-----------|-----------|
| C | 3.480070  | 0.150805  | 3.562878  |
| H | 3.859621  | 1.173342  | 3.415403  |
| C | 4.066202  | -0.679969 | 4.525749  |
| H | 4.905982  | -0.305612 | 5.131205  |
| C | 3.585548  | -1.988063 | 4.716128  |
| H | 4.049968  | -2.641499 | 5.470692  |
| C | 2.515930  | -2.456061 | 3.940928  |
| H | 2.127559  | -3.476185 | 4.074356  |
| C | 1.926378  | -1.622244 | 2.974939  |
| H | 1.090087  | -1.994987 | 2.369898  |
| C | 0.916593  | 2.106667  | 2.649224  |
| C | 0.610289  | 1.817498  | 3.996839  |
| H | 0.874497  | 0.838910  | 4.422081  |
| C | -0.030681 | 2.772090  | 4.800651  |
| H | -0.265445 | 2.528196  | 5.848188  |
| C | -0.364657 | 4.032092  | 4.278520  |
| H | -0.862502 | 4.780648  | 4.913589  |
| C | -0.063658 | 4.325592  | 2.939479  |
| H | -0.328375 | 5.302564  | 2.506669  |
| C | 0.558586  | 3.366316  | 2.128101  |
| H | 0.747838  | 3.600636  | 1.074193  |
| C | 3.185306  | 1.559846  | 0.864054  |
| C | 3.510136  | 2.928933  | 0.887351  |
| H | 2.834784  | 3.652030  | 1.362270  |
| C | 4.706759  | 3.386380  | 0.310076  |
| H | 4.941118  | 4.461744  | 0.335184  |
| C | 5.598109  | 2.485130  | -0.290425 |
| H | 6.532262  | 2.847840  | -0.745375 |
| C | 5.294734  | 1.112867  | -0.293048 |
| H | 5.993171  | 0.391236  | -0.743663 |
| C | 4.101263  | 0.656161  | 0.279501  |
| H | 3.878536  | -0.421412 | 0.282080  |

Conformation 33.

Multiplicity: 3

Charge: 0

E(B97-3c) = -3893.560975757845 Hartree

E(M06/def2-TZVP) = -3893.293048516383 Hartree

E(PBE - D3(BJ)/def2-TZVP) = -3891.975968812902 Hartree

E(PBE0 - D3(BJ)/def2-TZVP) = -3892.237063850715 Hartree

E(PBEh-3c) = -3888.290290971566 Hartree

E(PM6) = 89.87465 Kcal/mol

E(PM7) = 44.26548 Kcal/mol

E( $\omega$ B97X-V/def2-TZVP) = -3895.851085675509 Hartree

E(GFN1-xTB) = -161.271474674767 Hartree

E(GFN2-xTB) = -160.182984676831 Hartree

E(GFN-FF) = -22.392301594608 Hartree

Coordinates:

|    |           |           |           |
|----|-----------|-----------|-----------|
| Co | 0.087454  | -0.233351 | 0.313362  |
| N  | -0.866734 | 0.756632  | -1.156659 |
| N  | -0.682750 | -1.977049 | -0.057434 |
| C  | -2.252776 | 0.761238  | -3.377266 |
| C  | -1.578541 | 0.116829  | -2.100766 |
| C  | -1.801576 | -1.283351 | -2.051539 |
| H  | -2.385390 | -1.662690 | -2.890785 |
| C  | -1.451663 | -2.280815 | -1.117617 |
| C  | -2.030905 | -3.701684 | -1.469226 |
| C  | -1.655203 | 0.090000  | -4.641324 |
| H  | -2.117396 | 0.528706  | -5.549799 |
| H  | -1.825548 | -1.002694 | -4.671866 |
| H  | -0.561958 | 0.259155  | -4.704067 |
| C  | -3.774825 | 0.469196  | -3.325280 |
| H  | -4.280033 | 0.952908  | -4.186971 |
| H  | -4.225864 | 0.870142  | -2.396880 |
| H  | -4.007471 | -0.611678 | -3.364914 |
| C  | -2.107473 | 2.281139  | -3.595823 |
| H  | -2.627035 | 2.536178  | -4.542573 |
| H  | -1.059176 | 2.606565  | -3.694726 |
| H  | -2.564162 | 2.883525  | -2.793834 |
| C  | -1.336346 | -4.197484 | -2.761276 |
| H  | -1.742504 | -5.188217 | -3.053901 |
| H  | -0.244329 | -4.312021 | -2.611992 |
| H  | -1.488618 | -3.501300 | -3.608730 |
| C  | -1.869841 | -4.804238 | -0.403774 |
| H  | -2.405048 | -5.707732 | -0.761461 |
| H  | -2.304577 | -4.522543 | 0.572367  |
| H  | -0.819436 | -5.092025 | -0.228946 |
| C  | -3.554616 | -3.591575 | -1.737811 |
| H  | -3.961663 | -4.597434 | -1.968840 |
| H  | -3.799483 | -2.932969 | -2.591969 |
| H  | -4.089561 | -3.203567 | -0.849824 |
| C  | -0.640931 | 2.156848  | -1.150985 |
| C  | 0.529249  | 2.717801  | -1.750672 |
| C  | 0.697709  | 4.117579  | -1.685901 |
| H  | 1.609619  | 4.554595  | -2.123351 |
| C  | -0.256401 | 4.963062  | -1.108778 |
| H  | -0.101310 | 6.052443  | -1.099726 |
| C  | -1.399665 | 4.400374  | -0.527003 |
| H  | -2.149335 | 5.055949  | -0.056788 |
| C  | -1.597885 | 3.010453  | -0.508805 |

|   |           |           |           |
|---|-----------|-----------|-----------|
| C | 1.630752  | 1.969387  | -2.523902 |
| H | 2.575720  | 2.358015  | -2.086855 |
| C | 1.710566  | 0.443484  | -2.412222 |
| H | 1.657860  | 0.119786  | -1.353582 |
| H | 2.682522  | 0.098283  | -2.819682 |
| H | 0.902920  | -0.078825 | -2.958915 |
| C | 1.656709  | 2.373473  | -4.014002 |
| H | 2.570206  | 1.973344  | -4.500002 |
| H | 1.652778  | 3.472634  | -4.149623 |
| H | 0.783611  | 1.964314  | -4.560255 |
| C | -2.841208 | 2.453476  | 0.182651  |
| H | -2.817427 | 1.351362  | 0.060933  |
| C | -2.831776 | 2.769125  | 1.688575  |
| H | -1.902727 | 2.426561  | 2.178477  |
| H | -3.695638 | 2.287982  | 2.192854  |
| H | -2.910179 | 3.861455  | 1.867128  |
| C | -4.150750 | 2.974385  | -0.436615 |
| H | -5.026155 | 2.499818  | 0.052838  |
| H | -4.217561 | 2.768120  | -1.521541 |
| H | -4.249986 | 4.071263  | -0.299278 |
| C | -0.309223 | -2.844542 | 0.995720  |
| C | 0.825913  | -3.702208 | 0.851115  |
| C | 1.186950  | -4.541167 | 1.917331  |
| H | 2.054899  | -5.207776 | 1.807752  |
| C | 0.460652  | -4.546484 | 3.116330  |
| H | 0.746896  | -5.221563 | 3.936962  |
| C | -0.621249 | -3.669507 | 3.267395  |
| H | -1.177079 | -3.644680 | 4.218490  |
| C | -1.020735 | -2.802701 | 2.233017  |
| C | 1.650370  | -3.661144 | -0.428029 |
| H | 0.965956  | -3.350181 | -1.242451 |
| C | 2.716882  | -2.561804 | -0.308823 |
| H | 2.219494  | -1.595279 | -0.077135 |
| H | 3.283014  | -2.439190 | -1.255273 |
| H | 3.431453  | -2.780097 | 0.511252  |
| C | 2.265328  | -5.008019 | -0.824459 |
| H | 1.500354  | -5.809681 | -0.872863 |
| H | 3.052084  | -5.334335 | -0.113076 |
| H | 2.743816  | -4.931922 | -1.821922 |
| C | -2.144894 | -1.811715 | -2.521527 |
| H | -2.466645 | -2.043840 | 3.560178  |
| C | -1.641589 | -0.362181 | 2.548253  |
| H | -0.724588 | -0.243421 | 3.155070  |
| H | -2.410234 | 0.311176  | 2.975460  |
| H | -1.471168 | 0.038273  | 1.510883  |
| C | -3.394768 | -1.929101 | 1.634314  |
| H | -3.769759 | -2.970873 | 1.590728  |
| H | -3.193059 | -1.584814 | 0.601823  |
| H | -4.207973 | -1.295935 | 2.045688  |
| P | 1.625722  | 0.982187  | 1.434962  |
| C | 3.069040  | 1.768398  | 0.558088  |
| C | 3.959690  | 0.883187  | -0.088864 |
| H | 3.792851  | -0.200668 | -0.020574 |
| C | 5.058638  | 1.366895  | -0.809539 |
| H | 5.736472  | 0.657104  | -1.307921 |
| C | 5.293372  | 2.749438  | -0.895238 |
| H | 6.152052  | 3.132629  | -1.467126 |
| C | 4.431592  | 3.635476  | -0.232323 |
| H | 4.614597  | 4.720221  | -0.274039 |
| C | 3.330602  | 3.150692  | 0.493490  |
| H | 2.679413  | 3.864149  | 1.014134  |
| C | 2.599835  | -0.005683 | 2.676797  |
| C | 2.172881  | -1.286541 | 3.065949  |
| H | 1.276157  | -1.728068 | 2.610367  |
| C | 2.888800  | -2.011930 | 4.034209  |
| C | 2.537023  | -3.014253 | 4.318850  |
| C | 4.038726  | -1.462512 | 4.617447  |
| H | 4.602653  | -2.032101 | 5.372128  |
| C | 4.471864  | -0.180993 | 4.233223  |
| H | 5.374035  | 0.256842  | 4.687586  |
| C | 3.758064  | 0.543259  | 3.270049  |
| H | 4.100648  | 1.546314  | 2.973652  |
| C | 0.985239  | 2.322059  | 2.542742  |
| H | 0.539761  | 3.540788  | 1.990380  |
| C | 0.602386  | 3.712260  | 0.909146  |
| C | -0.006418 | 4.539924  | 2.808129  |
| H | -0.337984 | 5.484322  | 2.349956  |
| C | -0.155887 | 4.324328  | 4.186409  |
| H | -0.595695 | 5.103791  | 4.827003  |
| C | 0.250844  | 3.099976  | 4.740741  |
| H | 0.131207  | 2.914886  | 5.819383  |
| C | 0.824711  | 2.109036  | 3.929839  |
| H | 1.159776  | 1.164554  | 4.382878  |

Conformation 7.

Multiplicity: 3

Charge: 0

E(B97-3c) = -3893.568404119551 Hartree

E(M06/def2-TZVP) = -3893.297187092774 Hartree

E(PBE - D3(BJ)/def2-TZVP) = -3891.983218186719 Hartree

E(PBE0 - D3(BJ)/def2-TZVP) = -3892.244056380075 Hartree

E(PBEh-3c) = -3888.303860858014 Hartree  
 E(PM6) = 81.92260 Kcal/mol  
 E(PM7) = 42.27180 Kcal/mol  
 E( $\omega$ B97X-V/def2-TZVP) = -3895.861159013871 Hartree  
 E(GFN1-xTB) = -161.277616075449 Hartree  
 E(GFN2-xTB) = -160.191278104577 Hartree  
 E(GFN-FF) = -22.407544264399 Hartree

Coordinates:

|    |           |           |           |
|----|-----------|-----------|-----------|
| Co | -0.138952 | -0.048740 | -0.094793 |
| N  | 1.787715  | -0.451862 | 0.080884  |
| N  | 0.015544  | 1.476534  | -1.245135 |
| C  | 4.275924  | -0.094617 | -0.649100 |
| C  | 2.725024  | 0.225306  | -0.619242 |
| C  | 2.388677  | 1.306222  | -1.468679 |
| H  | 3.248381  | 1.754246  | -1.969055 |
| C  | 1.164292  | 1.948127  | -1.762229 |
| C  | 1.316631  | 3.222924  | -2.667072 |
| C  | 4.658395  | -0.417133 | -2.119772 |
| H  | 5.742373  | -0.646357 | -2.180722 |
| H  | 4.449986  | 0.419481  | -2.812456 |
| H  | 4.105605  | -1.302635 | -2.490346 |
| C  | 5.080793  | 1.148073  | -0.194394 |
| H  | 6.167099  | 0.935247  | -0.270884 |
| H  | 4.865596  | 1.406457  | 0.861115  |
| H  | 4.870454  | 2.043379  | -0.810638 |
| C  | 4.786421  | -1.282887 | 0.191985  |
| H  | 5.863669  | -1.419006 | -0.036971 |
| H  | 4.276157  | -2.230511 | -0.047919 |
| H  | 4.695958  | -1.117934 | 1.278989  |
| C  | 2.178316  | 2.897847  | -3.915003 |
| H  | 2.262689  | 3.805957  | -4.546133 |
| H  | 1.713268  | 2.102564  | -4.529642 |
| H  | 3.207015  | 2.576442  | -3.666117 |
| C  | 0.013163  | 3.845477  | -3.205524 |
| H  | 0.283591  | 4.682157  | -3.881812 |
| H  | -0.632896 | 4.255784  | -2.412079 |
| H  | -0.592001 | 3.126575  | -3.786990 |
| C  | 2.051954  | 4.297355  | -1.828478 |
| H  | 2.174173  | 5.227449  | -2.422326 |
| H  | 3.056925  | 3.954378  | -1.514118 |
| H  | 1.483383  | 4.550672  | -0.913055 |
| C  | 2.110478  | -1.268658 | 1.192667  |
| C  | 1.962612  | -2.686445 | 1.130265  |
| C  | 2.386643  | -3.455135 | 2.227194  |
| H  | 2.298544  | -4.549727 | 2.182895  |
| C  | 2.913959  | -2.857924 | 3.378896  |
| H  | 3.252443  | -3.481821 | 4.219749  |
| C  | 2.968654  | -2.460370 | 3.469627  |
| H  | 3.346382  | -0.994341 | 4.391268  |
| C  | 2.565240  | -0.646061 | 2.397459  |
| C  | 1.328883  | -3.330913 | -0.093825 |
| H  | 0.504389  | -2.625732 | -0.352391 |
| C  | 2.244933  | -3.388750 | -1.327111 |
| H  | 2.589204  | -2.382051 | -1.624443 |
| H  | 1.699275  | -3.825856 | -2.189786 |
| H  | 3.135297  | -4.024154 | -1.138105 |
| C  | 0.723392  | -4.710405 | 0.181968  |
| H  | 0.133165  | -5.052859 | -0.692144 |
| H  | 0.051773  | -4.697542 | 1.061668  |
| H  | 1.510390  | -5.473506 | 0.357955  |
| C  | 2.571956  | 0.875266  | 2.511979  |
| H  | 2.885866  | 1.283686  | 1.530380  |
| C  | 1.147065  | 1.395716  | 2.748765  |
| H  | 0.453945  | 1.001026  | 1.972767  |
| H  | 1.107811  | 2.502018  | 2.702701  |
| H  | 0.754976  | 1.077128  | 3.737108  |
| C  | 3.539802  | 1.426877  | 3.563208  |
| H  | 3.568871  | 2.534249  | 3.514100  |
| H  | 4.571164  | 1.050073  | 3.407621  |
| H  | 3.233726  | 1.156049  | 4.595175  |
| C  | -1.296961 | 1.973433  | -1.454534 |
| C  | -1.806488 | 3.046219  | -0.662456 |
| C  | -3.087222 | 3.549921  | -0.947673 |
| H  | -3.476316 | 4.389504  | -0.351473 |
| C  | -3.873409 | 3.006574  | -1.969428 |
| H  | -4.864554 | 3.428937  | -2.194363 |
| C  | -3.406927 | 1.888885  | -2.676596 |
| H  | -4.053229 | 1.428098  | -3.436616 |
| C  | -2.138207 | 1.338002  | -2.425648 |
| C  | -1.014790 | 3.632314  | 0.500453  |
| H  | 0.008684  | 3.206556  | 0.450122  |
| C  | -0.900954 | 5.164477  | 0.439317  |
| H  | -0.496002 | 5.513578  | -0.530911 |
| H  | -0.231713 | 5.536048  | 1.242255  |
| H  | -1.886917 | 5.652403  | 0.584167  |
| C  | -1.638431 | 3.190979  | 1.836499  |
| H  | -1.669630 | 2.088458  | 1.921906  |
| H  | -2.681658 | 3.555706  | 1.930366  |
| H  | -1.059514 | 3.589148  | 2.694765  |
| C  | -1.686618 | 0.058390  | -3.124710 |

|   |           |           |           |
|---|-----------|-----------|-----------|
| H | -1.181613 | -0.533904 | -2.320935 |
| C | -2.850919 | -0.783253 | -3.656606 |
| H | -3.606203 | -0.995906 | -2.874235 |
| H | -2.476222 | -1.755543 | -4.030745 |
| H | -3.360689 | -0.283213 | -4.506588 |
| C | -0.650142 | 0.289787  | -4.235351 |
| H | 0.260832  | 0.779210  | -3.849222 |
| H | -1.072645 | 0.922544  | -5.043804 |
| H | -0.346001 | -0.677023 | -4.686865 |
| P | -1.694636 | -1.321365 | 0.853363  |
| C | -2.687894 | -2.417500 | -0.276256 |
| C | -4.069008 | -2.635472 | -0.081967 |
| H | -4.591891 | -2.122448 | 0.738502  |
| C | -4.779200 | -3.503852 | -0.925051 |
| H | -5.856839 | -3.659259 | -0.762395 |
| C | -4.119595 | -4.177468 | -1.965732 |
| H | -4.677334 | -4.861357 | -2.623432 |
| C | -2.746821 | -3.967638 | -2.166057 |
| H | -2.220740 | -4.483892 | -2.983599 |
| C | -2.041224 | -3.084962 | -1.335207 |
| H | -0.970746 | -2.910176 | -1.514271 |
| C | -3.030972 | -0.236376 | 1.555577  |
| C | -3.252137 | -0.107298 | 2.942086  |
| H | -2.657215 | -0.699493 | 3.652017  |
| C | -4.237328 | 0.768572  | 3.257555  |
| H | -4.394891 | 0.858990  | 4.511537  |
| C | -5.025334 | 1.511788  | 2.534184  |
| H | -5.802261 | 2.191844  | 2.915503  |
| C | -4.812894 | 1.383732  | 1.152069  |
| H | -5.414627 | 1.965350  | 0.438228  |
| C | -3.816811 | 0.527169  | 0.655190  |
| H | -3.650808 | 0.459867  | -0.420374 |
| C | -1.389161 | -2.457228 | 2.283834  |
| C | -2.012326 | -3.713770 | 2.425084  |
| H | -2.697576 | -4.080068 | 1.647208  |
| C | -1.758085 | -4.505100 | 3.556123  |
| H | -2.245711 | -5.487506 | 3.651901  |
| C | -0.891027 | -4.047481 | 4.561012  |
| H | -0.694443 | -4.670546 | 5.446881  |
| C | -0.267446 | -2.797705 | 4.424303  |
| H | 0.432107  | -2.436205 | 5.192115  |
| C | -0.504774 | -2.014005 | 3.286800  |
| H | 0.018146  | -1.055934 | 3.164019  |

WUDYOL

Conformation 0.

Multiplicity: 2

Charge: 0

E(B97-3c) = -3367.159382788117 Hartree  
 E(M06/def2-TZVP) = -3366.992280859620 Hartree  
 E(PBE - D3(BJ)/def2-TZVP) = -3365.96843372718 Hartree  
 E(PBE0 - D3(BJ)/def2-TZVP) = -3366.034036672497 Hartree  
 E(PBEh-3c) = -3362.577014132278 Hartree  
 E(PM6) = 65.51977 Kcal/mol  
 E(PM7) = 111.42633 Kcal/mol  
 E( $\omega$ B97X-V/def2-TZVP) = -3368.997914549946 Hartree  
 E(GFN1-xTB) = -130.537921840998 Hartree  
 E(GFN2-xTB) = -127.373494875306 Hartree  
 E(GFN-FF) = -15.779968118754 Hartree

Coordinates:

|    |           |           |           |
|----|-----------|-----------|-----------|
| Co | 0.341013  | 0.113855  | -0.487642 |
| N  | -0.075237 | -1.560856 | -1.426005 |
| O  | -4.499134 | -2.980696 | 1.497517  |
| O  | -4.262037 | -1.995241 | 3.533288  |
| C  | -1.841110 | 0.832557  | 1.483856  |
| C  | 1.651714  | -1.541399 | -3.199741 |
| N  | 0.734389  | 1.818529  | 0.398168  |
| C  | -1.947420 | -2.377129 | -0.031781 |
| H  | -2.681466 | -3.177118 | 0.129091  |
| C  | -2.055820 | -1.239553 | 0.764479  |
| C  | 3.703608  | -0.111425 | -3.065595 |
| H  | 4.250731  | -0.599106 | -3.878587 |
| C  | 2.186980  | -2.186930 | -4.433841 |
| N  | 1.973833  | 0.303956  | -1.559455 |
| C  | 2.653988  | -3.519287 | -4.418875 |
| H  | 2.623779  | -4.085865 | -3.476158 |
| C  | 2.764940  | -2.052203 | -6.806212 |
| H  | 2.803205  | -1.473087 | -7.741458 |
| C  | 2.253641  | -1.460059 | -5.642264 |
| H  | 1.891459  | -0.421098 | -5.660861 |
| C  | 3.166838  | -4.110141 | -5.582848 |
| H  | 3.532881  | -5.147746 | -5.552004 |
| C  | 4.223585  | 3.141545  | -0.337265 |
| C  | 3.221974  | -3.739379 | -6.780415 |
| H  | 3.624036  | -3.843831 | -7.693581 |
| C  | 4.650452  | 3.926134  | -1.430494 |
| H  | 4.083884  | 3.884868  | -2.372880 |
| C  | 6.483224  | 4.826856  | -0.108142 |

|   |           |           |           |   |           |           |           |
|---|-----------|-----------|-----------|---|-----------|-----------|-----------|
| H | 7.362924  | 5.482203  | -0.019288 | C | -5.410338 | 5.681984  | -2.230206 |
| C | 4.943269  | 3.220603  | 0.874669  | H | -6.186789 | 6.385076  | -2.567866 |
| H | 4.615301  | 2.612289  | 1.731061  | C | -4.756923 | 3.457096  | -1.494447 |
| C | 6.065112  | 4.054752  | 0.987280  | H | -5.019409 | 2.416583  | -1.250524 |
| H | 6.618569  | 4.099227  | 1.937656  | C | -5.746261 | 4.353746  | -1.923966 |
| C | 5.771338  | 4.761429  | -1.316463 | H | -6.788580 | 4.012388  | -2.016494 |
| H | 6.086966  | 5.371197  | -2.176779 | C | -4.078327 | 6.107966  | -2.106571 |
| C | -3.105522 | -1.036081 | 1.739198  | H | -3.805256 | 7.145206  | -2.353817 |
| C | -1.071571 | -2.472445 | -1.103797 | C | 1.198298  | -3.440328 | -0.469669 |
| C | 3.030937  | 1.179525  | -1.336226 | C | 1.537177  | -0.855322 | -0.266759 |
| C | 0.496979  | -2.052838 | -2.589715 | C | -1.688815 | 3.130830  | 0.292431  |
| C | -1.139844 | -3.529522 | -2.085129 | C | 1.283380  | 1.271953  | 2.770148  |
| H | -1.856481 | -4.358306 | -2.051026 | C | 2.288167  | -0.625883 | 3.478783  |
| C | 2.372548  | -0.477456 | -2.634775 | H | 2.861570  | -1.397335 | 4.005792  |
| C | -0.121255 | 2.549725  | 1.212490  | C | -0.205357 | 3.022076  | 1.921389  |
| C | 4.124697  | 0.895360  | -2.238691 | C | -1.078776 | 0.056150  | -2.618450 |
| H | 5.088510  | 1.413633  | -2.235397 | C | -1.892953 | 4.297018  | 1.123157  |
| C | 0.486804  | 3.798779  | 1.607350  | H | -2.661852 | 5.057490  | 0.955793  |
| H | 0.000063  | 4.550140  | 2.239942  | C | -1.917352 | 0.610717  | -3.655193 |
| C | 1.887620  | 2.580734  | 0.315671  | H | -2.026386 | 0.181090  | -4.657766 |
| C | -0.190768 | -3.249967 | -3.031525 | C | -2.033038 | 1.844730  | -1.763527 |
| H | 0.045182  | -3.804524 | -3.945114 | C | 2.164654  | 0.705731  | 3.772081  |
| C | -3.000553 | 0.285090  | 2.156746  | H | 2.611448  | 1.267341  | 4.598326  |
| C | 1.745072  | 3.811415  | 1.067531  | C | 0.746133  | -3.137837 | -1.749171 |
| H | 2.515787  | 4.585077  | 1.144008  | C | -2.528550 | 1.712328  | -3.118984 |
| C | -1.345191 | 2.115999  | 1.700734  | H | -3.238520 | 2.399410  | -3.590371 |
| H | -1.903634 | 2.765090  | 2.386948  | C | -0.407525 | -1.150392 | -2.750980 |
| C | 3.024679  | 2.259446  | -0.441487 | H | -0.479074 | -1.695714 | -3.700524 |
| N | -1.272067 | -0.105557 | 0.640876  | C | -2.367332 | 2.911565  | -0.915220 |
| C | -4.035362 | -2.094656 | 2.200627  | N | 0.409199  | -1.246849 | -0.428003 |
| C | -3.904282 | 1.063319  | 3.034904  | C | 1.713350  | -4.725365 | 0.058738  |
| O | -3.567182 | 2.011896  | 3.730208  | C | 0.804543  | -3.960613 | -2.980743 |
| O | -5.187722 | 0.633076  | 2.925563  | O | -0.007831 | -3.926996 | -3.894336 |
| C | -6.159390 | 1.314822  | 3.746010  | O | 1.912052  | -4.739917 | -3.001689 |
| H | -7.112635 | 1.217988  | 3.190410  | C | 2.019351  | -5.645575 | -4.116426 |
| H | -5.879889 | 2.385791  | 3.810960  | H | 1.983597  | -5.063081 | -5.061311 |
| C | -5.176717 | -2.951087 | 4.104967  | H | 1.129403  | -6.311740 | -4.121305 |
| H | -5.058026 | -3.920906 | 3.580085  | C | 1.596703  | -7.080923 | -0.159283 |
| H | -6.213166 | -2.598950 | 3.905589  | H | 1.460452  | -7.213088 | 0.935134  |
| C | -6.254541 | 0.698726  | 5.132620  | H | 2.691013  | -7.122633 | -0.349229 |
| H | -6.534060 | -0.371557 | 5.078165  | C | 3.313870  | -6.417510 | -3.964223 |
| H | -7.025427 | 1.227222  | 5.729101  | H | 4.184403  | -5.732417 | -3.949202 |
| H | -5.287378 | 0.787410  | 5.664597  | H | 3.439561  | -7.120727 | -4.811122 |
| C | -4.888903 | -3.051242 | 5.589343  | H | 3.321997  | -7.003255 | -3.023241 |
| H | -3.856717 | -3.412567 | 5.767003  | C | 0.833490  | -8.113988 | -0.962649 |
| H | -5.592806 | -3.762648 | 6.065237  | H | -0.254894 | -8.403020 | -0.768365 |
| H | -4.999192 | -2.067808 | 6.087567  | H | 1.169813  | -9.133638 | -0.689271 |
|   |           |           |           | H | 0.997929  | -7.974901 | -2.049957 |

Conformation 16.

Multiplicity: 2

Charge: 0

E(B97-3c) = converged!) Hartree

E(M06/def2-TZVP) = -3366.992755779787 Hartree

E(PBE - D3(BJ)/def2-TZVP) = -3365.969028660086 Hartree

E(PBE0 - D3(BJ)/def2-TZVP) = -3366.035072868632 Hartree

E(PBEh-3c) = -3362.578405776997 Hartree

E(PM6) = 66.49799 Kcal/mol

E(PM7) = 111.32898 Kcal/mol

E( $\omega$ B97X-V/def2-TZVP) = -3368.999458609018 Hartree

E(GFN1-xTB) = -130.536871835805 Hartree

E(GFN2-xTB) = -127.373131539602 Hartree

E(GFN-FF) = -15.779520085293 Hartree

Coordinates:

|    |           |           |           |
|----|-----------|-----------|-----------|
| Co | -0.118933 | 0.558760  | 0.187646  |
| N  | 0.929731  | 0.314755  | 1.831395  |
| O  | 2.544749  | -4.846189 | 0.947708  |
| O  | 1.109161  | -5.780035 | -0.538752 |
| C  | 0.233181  | -1.786510 | -1.690206 |
| C  | 0.780993  | 2.580355  | 2.817137  |
| N  | -1.137944 | 0.830647  | -1.466642 |
| C  | 1.519281  | -2.076623 | 1.608507  |
| H  | 2.031912  | -2.934244 | 2.062618  |
| C  | 1.021321  | -2.239018 | 0.317827  |
| C  | -0.949883 | 4.246616  | 2.114400  |
| H  | -0.786036 | 4.951506  | 2.935627  |
| C  | 1.232789  | 3.509237  | 3.894048  |
| N  | -0.674315 | 2.333564  | 0.811366  |
| C  | 1.945019  | 4.682805  | 3.565295  |
| H  | 2.171143  | 4.891689  | 2.508761  |
| C  | 1.366761  | 4.135925  | 6.253545  |
| H  | 1.129111  | 3.921320  | 7.306651  |
| C  | 0.945565  | 3.249508  | 5.251585  |
| H  | 0.373151  | 2.347358  | 5.514760  |
| C  | 2.367366  | 5.567814  | 4.567966  |
| H  | 2.927851  | 6.474771  | 4.294453  |
| C  | -3.415557 | 3.875670  | -1.360580 |
| C  | 2.080889  | 5.296397  | 5.915211  |
| H  | 2.411994  | 5.991111  | 6.701961  |
| C  | -3.088711 | 5.212440  | -1.675789 |
| H  | -2.042003 | 5.540942  | -1.590929 |

Conformation 19.

Multiplicity: 2

Charge: 0

E(B97-3c) = -3367.158645434764 Hartree

E(M06/def2-TZVP) = -3366.992065531022 Hartree

E(PBE - D3(BJ)/def2-TZVP) = -3365.967817113296 Hartree

E(PBE0 - D3(BJ)/def2-TZVP) = -3366.033339476244 Hartree

E(PBEh-3c) = -3362.576796724290 Hartree

E(PM6) = 64.33428 Kcal/mol

E(PM7) = 110.92964 Kcal/mol

E( $\omega$ B97X-V/def2-TZVP) = -3368.996388442925 Hartree

E(GFN1-xTB) = -130.539912437967 Hartree

E(GFN2-xTB) = -127.374030582060 Hartree

E(GFN-FF) = -15.783350483146 Hartree

Coordinates:

|    |           |           |           |
|----|-----------|-----------|-----------|
| Co | -0.155954 | 0.564459  | 0.005685  |
| N  | 0.879508  | 0.764894  | 1.654840  |
| O  | 3.336556  | -4.045908 | 1.690732  |
| O  | 3.236691  | -5.017685 | -0.357162 |
| C  | 0.069683  | -2.246691 | -1.087189 |
| C  | -0.066657 | 2.876640  | 2.542636  |
| N  | -1.157831 | 0.397655  | -1.672848 |
| C  | 2.252474  | -1.287605 | 1.549980  |
| H  | 3.045510  | -1.876659 | 2.026768  |
| C  | 1.543959  | -1.888577 | 0.510781  |
| C  | -1.605773 | 4.358232  | 1.224029  |
| H  | -1.769836 | 5.113404  | 1.998953  |
| C  | -0.099353 | 3.817167  | 3.700480  |
| N  | -0.868709 | 2.374609  | 0.244321  |
| C  | 0.385605  | 5.137890  | 3.584475  |
| H  | 0.794490  | 5.475291  | 2.620220  |
| C  | -0.621596 | 4.256238  | 6.048768  |
| H  | -1.020711 | 3.906068  | 7.012932  |
| C  | -0.599460 | 3.386783  | 4.948536  |
| H  | -0.978901 | 2.358396  | 5.045994  |
| C  | 0.364716  | 6.006181  | 4.685755  |
| H  | 0.752646  | 7.030828  | 4.579877  |
| C  | -2.674273 | 3.700308  | -2.838737 |
| C  | -0.140315 | 5.568785  | 5.920581  |
| H  | -0.156436 | 6.250721  | 6.784266  |
| C  | -1.996073 | 4.853413  | -3.289864 |

|   |           |           |           |   |           |           |           |
|---|-----------|-----------|-----------|---|-----------|-----------|-----------|
| H | -0.945532 | 5.003011  | -2.998373 | C | -1.459927 | 4.930310  | -3.013446 |
| C | -3.984230 | 5.597119  | -4.477610 | H | -1.811679 | 3.989537  | -3.463234 |
| H | -4.494041 | 6.334602  | -5.115920 | C | -1.304572 | 7.357779  | -3.045686 |
| C | -4.022247 | 3.516801  | -3.216288 | H | -1.532099 | 8.321824  | -3.525397 |
| H | -4.564688 | 2.631675  | -2.851522 | C | -0.273263 | 6.092130  | -1.241805 |
| C | -4.671100 | 4.457628  | -4.029302 | H | 0.319035  | 6.061040  | -0.314943 |
| H | -5.724357 | 4.302520  | -4.308890 | C | -0.563298 | 7.320282  | -1.853872 |
| C | -2.645088 | 5.792680  | -4.104376 | H | -0.201468 | 8.255151  | -1.399207 |
| H | -2.099187 | 6.682763  | -4.452661 | C | -1.751403 | 6.158857  | -3.623820 |
| C | 1.738395  | -3.257745 | 0.078128  | H | -2.334868 | 6.179707  | -4.556933 |
| C | 1.902698  | -0.063096 | 2.099165  | C | 1.475676  | -3.494166 | -0.831431 |
| C | -1.608297 | 3.116463  | -0.665572 | C | -0.254135 | -1.821378 | 2.092674  |
| C | 0.795539  | 1.770691  | -2.602335 | C | -0.912458 | 3.266144  | 0.092619  |
| C | 2.489694  | 0.452388  | 3.314190  | C | -0.840980 | 0.098235  | 2.992133  |
| H | 3.321959  | -0.021131 | 3.847884  | C | -0.656689 | -2.108006 | 3.449342  |
| C | -0.828973 | 3.150814  | 1.397945  | H | -0.652709 | -3.107978 | 3.898838  |
| C | -1.340118 | -0.757068 | -2.421336 | C | -1.220673 | 2.333446  | 2.066161  |
| C | -2.060367 | 4.353168  | -0.067469 | C | 1.663841  | 0.934073  | -2.404282 |
| H | -2.682290 | 5.097957  | -0.574082 | C | -1.700921 | 4.192801  | 0.874147  |
| C | -2.058657 | -0.471576 | -3.641388 | H | -2.070122 | 5.157710  | 0.513069  |
| H | -2.312557 | -1.222015 | -4.399082 | C | 1.949691  | 1.955185  | -3.384809 |
| C | -1.773390 | 1.400888  | -2.406023 | H | 2.639300  | 1.826782  | -4.227219 |
| C | 1.787126  | 1.580866  | 3.642234  | C | 0.456413  | 2.686912  | -1.852726 |
| H | 1.926408  | 2.251235  | 4.496387  | C | -0.986578 | -0.909581 | 4.023217  |
| C | 0.774275  | -3.498346 | -0.897635 | H | -1.316371 | -0.709519 | 5.047485  |
| C | -2.293517 | 0.877215  | -3.653731 | C | 2.080113  | -2.787091 | -1.863645 |
| H | -2.788698 | 1.476954  | -4.423800 | C | 1.184119  | 3.041107  | -3.054959 |
| C | -0.845130 | -2.015769 | -2.112987 | H | 1.116664  | 4.010896  | -3.558229 |
| H | -1.075983 | -2.855415 | -2.780422 | C | 2.138509  | -0.364445 | -2.507681 |
| C | -1.974921 | 2.716444  | -1.961666 | H | 2.824340  | -0.623890 | -3.324180 |
| N | 0.525635  | -1.284133 | -0.204083 | C | -0.403922 | 3.566695  | -1.178979 |
| C | 2.824180  | -4.132646 | 0.581797  | N | 0.949955  | -1.238124 | -0.535148 |
| C | 0.425839  | -4.751491 | -1.611120 | C | 1.631084  | -4.942827 | -0.527358 |
| O | -0.030838 | -4.805774 | -2.746012 | C | 2.862189  | -3.306064 | -3.009471 |
| O | 0.611571  | -5.844458 | -0.833746 | O | 3.680602  | -2.662168 | -3.653423 |
| C | 0.321264  | -7.115880 | -1.453920 | O | 2.539216  | -4.592364 | -3.278648 |
| H | -0.636747 | -7.032102 | -2.007082 | C | 3.306031  | -5.252324 | -4.306368 |
| H | 0.188008  | -7.809917 | -0.601226 | H | 3.348507  | -6.311914 | -3.985574 |
| C | 4.268032  | -5.939953 | 0.055299  | H | 4.331179  | -4.830874 | -4.312750 |
| H | 5.049475  | -5.377547 | 0.606493  | C | 0.517570  | -6.894655 | 0.229770  |
| H | 4.694162  | -6.314498 | -0.895853 | H | 1.276414  | -7.038253 | 1.028502  |
| C | 1.435503  | -7.574244 | -2.382665 | H | 0.880034  | -7.460810 | -0.654281 |
| H | 1.539893  | -6.879073 | -3.237124 | C | 2.647436  | -5.098452 | -5.667658 |
| H | 1.199427  | -8.581053 | -2.782741 | H | 1.609567  | -5.486400 | -5.654059 |
| H | 2.405021  | -7.631615 | -1.850726 | H | 3.218238  | -5.662911 | -6.432510 |
| C | 3.720965  | -7.072254 | 0.911358  | H | 2.624366  | -4.033859 | -5.970929 |
| H | 3.323979  | -6.679695 | 1.866578  | C | -0.867704 | -7.328137 | 0.662940  |
| H | 4.530949  | -7.792990 | 1.143629  | H | -1.205530 | -6.760536 | 1.553018  |
| H | 2.910996  | -7.617236 | 0.388202  | H | -0.864417 | -8.405467 | 0.921984  |
|   |           |           |           | H | -1.605655 | -7.167832 | -0.147790 |

Conformation 20.

Multiplicity: 2

Charge: 0

E(B97-3c) = -3367.157770368557 Hartree  
 E(M06/def2-TZVP) = -3366.989652078966 Hartree  
 E(PBE - D3(BJ)/def2-TZVP) = -3365.966264661020 Hartree  
 E(PBE0 - D3(BJ)/def2-TZVP) = -3366.031993362115 Hartree  
 E(PBEh-3c) = -3362.575336082713 Hartree  
 E(PM6) = 66.96457 Kcal/mol  
 E(PM7) = 112.31984 Kcal/mol  
 E( $\omega$ B97X-V/def2-TZVP) = -3368.997505453103 Hartree  
 E(GFN1-xTB) = -130.535278876975 Hartree  
 E(GFN2-xTB) = -127.370837819746 Hartree  
 E(GFN-FF) = -15.777239715432 Hartree

Coordinates:

|    |           |           |           |
|----|-----------|-----------|-----------|
| Co | 0.176251  | 0.451465  | 0.164384  |
| N  | -0.355268 | -0.463877 | 1.820653  |
| O  | 2.671290  | -5.568840 | -0.608473 |
| O  | 0.457046  | -5.493827 | -0.112872 |
| C  | 1.742223  | -1.394655 | -1.658225 |
| C  | -1.244887 | 1.432565  | 3.141628  |
| N  | 0.769822  | 1.399734  | -1.448300 |
| C  | 0.217402  | -2.793868 | 1.223514  |
| H  | 0.182066  | -3.840468 | 1.547580  |
| C  | 0.800580  | -2.511683 | -0.009808 |
| C  | -1.866845 | 3.626435  | 2.109352  |
| H  | -2.406283 | 4.023677  | 2.974984  |
| C  | -1.787950 | 1.899328  | 4.450757  |
| N  | -0.657517 | 2.106863  | 0.817524  |
| C  | -2.991544 | 1.376104  | 4.971315  |
| H  | -3.537486 | 0.613420  | 4.395770  |
| C  | -1.615814 | 3.349643  | 6.412472  |
| H  | -1.070240 | 4.122197  | 6.975578  |
| C  | -1.109449 | 2.895367  | 5.185985  |
| H  | -0.171079 | 3.308485  | 4.786074  |
| C  | -3.498369 | 1.832277  | 6.196991  |
| H  | -4.441613 | 1.418311  | 6.585027  |
| C  | -0.720107 | 4.880359  | -1.811932 |
| C  | -2.811370 | 2.818834  | 6.922324  |
| H  | -3.209512 | 3.175877  | 7.884247  |

Conformation 21.

Multiplicity: 2

Charge: 0

E(B97-3c) = -3367.157794361162 Hartree  
 E(M06/def2-TZVP) = -3366.990631836714 Hartree  
 E(PBE - D3(BJ)/def2-TZVP) = -3365.966807133785 Hartree  
 E(PBE0 - D3(BJ)/def2-TZVP) = -3366.032446827778 Hartree  
 E(PBEh-3c) = -3362.575285059553 Hartree  
 E(PM6) = 66.17919 Kcal/mol  
 E(PM7) = 111.82583 Kcal/mol  
 E( $\omega$ B97X-V/def2-TZVP) = -3368.996799562360 Hartree  
 E(GFN1-xTB) = -130.536320680686 Hartree  
 E(GFN2-xTB) = -127.372058919929 Hartree  
 E(GFN-FF) = -15.778291512796 Hartree

Coordinates:

|    |           |           |           |
|----|-----------|-----------|-----------|
| Co | -0.087975 | -0.505802 | -0.248083 |
| N  | 1.590202  | -1.403556 | -0.721929 |
| O  | 5.036760  | 2.641169  | 0.412672  |
| O  | 4.018935  | 4.208668  | 1.700868  |
| C  | 0.389861  | 2.402209  | 0.463700  |
| C  | 0.728149  | -3.473674 | -1.779348 |
| N  | -1.773785 | 0.366226  | 0.255004  |
| C  | 3.217156  | 0.281723  | 0.066193  |
| H  | 4.277368  | 0.537481  | 0.187542  |
| C  | 2.285796  | 1.289487  | 0.304178  |
| C  | -1.687035 | -4.150807 | -1.723312 |
| H  | -1.584682 | -5.068311 | -2.310830 |
| C  | 1.086368  | -4.710284 | -2.533947 |
| H  | -1.080474 | -2.130939 | -0.727216 |
| C  | 0.899345  | -5.990362 | -1.968825 |
| H  | 0.483658  | -6.071182 | -0.953226 |
| C  | 1.992920  | -5.771527 | -4.541656 |
| H  | 2.419384  | -5.680110 | -5.552234 |
| C  | 1.642117  | -4.616157 | -3.828145 |
| H  | 1.791519  | -3.621370 | -4.274331 |
| C  | 1.251865  | -7.145174 | -2.682327 |
| H  | 1.105029  | -8.135372 | -2.224588 |
| C  | -4.730962 | -2.402876 | 0.362569  |
| C  | 1.797929  | -7.039518 | -3.971481 |

|   |           |           |           |   |           |           |           |
|---|-----------|-----------|-----------|---|-----------|-----------|-----------|
| H | 2.074315  | -7.946016 | -4.531044 | C | 7.738456  | 1.429339  | -0.562200 |
| C | -5.837810 | -1.500347 | -0.325733 | H | 8.800591  | 1.701280  | -0.657691 |
| H | -5.670927 | -0.695702 | -1.057484 | C | 0.618761  | -5.401715 | -2.840162 |
| C | -7.340861 | -3.030751 | 0.822424  | H | 0.118779  | -4.728578 | -3.552662 |
| H | -8.356605 | -3.414668 | 1.001600  | C | 1.541440  | -7.585608 | -2.292743 |
| C | -4.952522 | -3.093046 | 1.279495  | H | 1.750130  | -8.629593 | -2.571538 |
| H | -4.093739 | -3.521193 | 1.818189  | C | 1.668180  | -5.768390 | -0.681084 |
| C | -6.247085 | -3.581439 | 1.508863  | H | 1.971963  | -5.385127 | 0.304714  |
| H | -6.402594 | -4.396570 | 2.231993  | C | 1.932992  | -7.099218 | -1.035428 |
| C | -7.131890 | -1.990455 | -0.097025 | H | 2.446585  | -7.761963 | -0.322356 |
| H | -7.982927 | -1.560804 | -0.647235 | C | 0.885716  | -6.732346 | -3.194409 |
| C | 2.639574  | 2.653413  | 0.632303  | H | 0.585244  | -7.103365 | -4.186179 |
| C | 2.877826  | -0.960840 | -0.447825 | C | -2.818874 | 2.424984  | 1.269609  |
| C | -2.425507 | -2.394376 | -0.507197 | C | 0.959894  | 2.208512  | 1.423451  |
| C | 1.760332  | -2.620864 | -1.360255 | C | 1.836069  | -2.622289 | -1.030706 |
| C | 3.859119  | -1.926086 | -0.885267 | C | 2.720974  | 1.272756  | 0.495217  |
| H | 4.941848  | -1.802974 | -0.766355 | C | 2.102803  | 2.995865  | 1.822323  |
| C | -0.610862 | -3.226042 | -1.444045 | H | 2.050102  | 3.884019  | 2.462815  |
| C | -1.956869 | 1.706977  | 0.562879  | C | 3.096732  | -0.850116 | -0.665890 |
| C | -2.805954 | -3.651197 | -1.112948 | C | -2.323213 | -1.694752 | -0.915096 |
| H | -3.818430 | -4.066967 | -1.099365 | C | 3.181319  | -2.977501 | -1.424515 |
| C | -3.321979 | 1.963629  | 0.957300  | H | 3.473492  | -3.949299 | -1.834821 |
| H | -3.706119 | 2.946158  | 1.255516  | C | -2.822658 | -2.977769 | -1.350269 |
| C | -3.018175 | -0.216838 | 0.442964  | H | -3.878524 | -3.197779 | -1.546566 |
| C | 3.167099  | -2.950992 | -1.472427 | C | -0.578830 | -3.026234 | -1.075723 |
| H | 3.554466  | -3.867490 | -1.928864 | C | 3.197799  | 2.429254  | 1.226092  |
| C | 1.447153  | 3.364618  | 0.697273  | H | 4.246089  | 2.739674  | 1.281911  |
| C | -3.974718 | 0.760528  | 0.922278  | C | -3.603373 | 1.563841  | 0.517455  |
| H | -5.015032 | 0.540229  | 1.180981  | C | -1.744412 | -3.819665 | -1.410444 |
| C | -0.969242 | 2.681276  | 0.586822  | H | -1.721614 | -4.882111 | -1.671979 |
| H | -1.259694 | 3.708544  | 0.834419  | C | -3.149771 | -0.614904 | -0.638580 |
| C | -3.346919 | -1.541140 | 0.119257  | H | -4.217051 | -0.698994 | -0.875700 |
| N | 0.913917  | 1.146222  | 0.202448  | C | 0.740922  | -3.485942 | -1.190300 |
| C | 4.018710  | 3.139063  | 0.873932  | N | -1.410545 | 0.782231  | 0.399276  |
| C | 1.307074  | 4.838168  | 0.851742  | C | -3.296527 | 3.685209  | 1.895448  |
| O | 2.007985  | 5.660563  | 0.290300  | C | -5.083209 | 1.629980  | 0.404975  |
| O | 0.280199  | 5.164508  | 1.686232  | O | -5.827303 | 1.946588  | 1.314626  |
| C | 0.069253  | 6.576576  | 1.915633  | O | -5.510400 | 1.288193  | -0.842593 |
| H | -1.011757 | 6.666388  | 2.140948  | C | -6.934781 | 1.405419  | -1.068389 |
| H | 0.297310  | 7.128722  | 0.981745  | H | -7.470204 | 1.055403  | -0.162628 |
| C | 5.274185  | 4.894631  | 1.877121  | H | -7.142508 | 0.714697  | -1.908935 |
| H | 5.838888  | 4.857209  | 0.923015  | C | -3.065851 | 5.162375  | 3.735527  |
| H | 5.877305  | 4.344071  | 2.631711  | H | -4.162987 | 5.122690  | 3.900704  |
| C | 0.923782  | 7.075517  | 3.069053  | H | -2.878216 | 6.025634  | 3.061746  |
| H | 0.728573  | 6.489486  | 3.988960  | C | -7.314953 | 2.838146  | -1.405465 |
| H | 0.695546  | 8.140041  | 3.278774  | H | -7.092867 | 3.507214  | -0.551580 |
| H | 1.999552  | 6.995428  | 2.820403  | H | -8.399614 | 2.902624  | -1.626020 |
| C | 4.966619  | 6.313431  | 2.313282  | H | -6.756422 | 3.197494  | -2.292314 |
| H | 4.341367  | 6.819817  | 1.551956  | C | -2.291281 | 5.262186  | 5.033277  |
| H | 5.906609  | 6.885864  | 2.442473  | H | -2.487868 | 4.384520  | 5.680180  |
| H | 4.420161  | 6.325777  | 3.277538  | H | -2.592845 | 6.174323  | 5.585311  |
|   |           |           |           | H | -1.199696 | 5.317507  | 4.848450  |

Conformation 31.

Multiplicity: 2

Charge: 0

E(B97-3c) = -3367.156200049537 Hartree  
 E(M06/def2-TZVP) = -3366.987783231865 Hartree  
 E(PBE - D3(BJ)/def2-TZVP) = -3365.964460512888 Hartree  
 E(PBE0 - D3(BJ)/def2-TZVP) = -3366.029998563644 Hartree  
 E(PBEh-3c) = -3362.573107430876 Hartree  
 E(PM6) = 68.26084 Kcal/mol  
 E(PM7) = 113.73731 Kcal/mol  
 E( $\omega$ B97X-V/def2-TZVP) = -3368.995951689086 Hartree  
 E(GFN1-xTB) = -130.532667801393 Hartree  
 E(GFN2-xTB) = -127.368916359100 Hartree  
 E(GFN-FF) = -15.776054394029 Hartree

Coordinates:

|    |           |           |           |
|----|-----------|-----------|-----------|
| Co | 0.194843  | -0.280317 | -0.073901 |
| N  | 1.349045  | 1.137849  | 0.630146  |
| O  | -4.152780 | 4.409292  | 1.421693  |
| O  | -2.657441 | 3.949513  | 3.067284  |
| C  | -2.717278 | 0.539068  | 0.010474  |
| C  | 3.564754  | 0.380850  | -0.183752 |
| N  | -0.947487 | -1.731738 | -0.740020 |
| C  | -0.348073 | 2.572008  | 1.710517  |
| H  | -0.521376 | 3.450836  | 2.342341  |
| C  | -1.461245 | 1.929738  | 1.173128  |
| C  | 3.957191  | -1.866188 | -1.229844 |
| H  | 5.023409  | -1.736013 | -1.439166 |
| C  | 5.009650  | 0.729480  | -0.317856 |
| N  | 1.786909  | -1.309898 | -0.582374 |
| C  | 5.402717  | 1.827916  | -1.112342 |
| H  | 4.631615  | 2.408042  | -1.641370 |
| C  | 7.358551  | 0.338668  | 0.236017  |
| H  | 8.121755  | -0.243547 | 0.774595  |
| C  | 6.005172  | -0.008810 | 0.357847  |
| H  | 5.705219  | -0.854588 | 0.994612  |
| C  | 6.756522  | 2.173349  | -1.235217 |
| H  | 7.046326  | 3.028847  | -1.864193 |
| C  | 1.003365  | -4.903074 | -1.576767 |

Conformation 32.

Multiplicity: 2

Charge: 0

E(B97-3c) = -3367.153712380089 Hartree  
 E(M06/def2-TZVP) = -3366.984177544703 Hartree  
 E(PBE - D3(BJ)/def2-TZVP) = -3365.961902676208 Hartree  
 E(PBE0 - D3(BJ)/def2-TZVP) = -3366.027311552042 Hartree  
 E(PBEh-3c) = -3362.571252763582 Hartree  
 E(PM6) = 71.05000 Kcal/mol  
 E(PM7) = 116.59040 Kcal/mol  
 E( $\omega$ B97X-V/def2-TZVP) = -3368.990966907922 Hartree  
 E(GFN1-xTB) = -130.527860062174 Hartree  
 E(GFN2-xTB) = -127.364912983311 Hartree  
 E(GFN-FF) = -15.769901516953 Hartree

Coordinates:

|    |           |           |           |
|----|-----------|-----------|-----------|
| Co | -0.122564 | -0.369242 | 0.189884  |
| N  | -1.877384 | -0.032880 | -0.630422 |
| O  | -1.788608 | 5.429839  | -0.313928 |
| O  | 0.338059  | 6.198859  | -0.050214 |
| C  | 1.467154  | 2.187713  | 0.459883  |
| C  | -2.598935 | -2.343740 | -1.149505 |
| N  | 1.628222  | -0.717769 | 1.013939  |
| C  | -1.946107 | 2.436805  | -0.491640 |
| H  | -2.538025 | 3.345224  | -0.661635 |
| C  | -0.629733 | 2.604021  | -0.072701 |
| C  | -1.532105 | -4.361851 | -0.125772 |
| H  | -2.276170 | -5.085261 | -0.473950 |
| C  | -3.610841 | -3.220994 | -1.808354 |
| N  | -0.495262 | -2.296494 | -0.183507 |
| C  | -4.944599 | -3.271643 | -1.348948 |
| H  | -5.238572 | -2.655128 | -0.486146 |
| C  | -4.177515 | -4.872148 | -3.520290 |
| H  | -3.872088 | -5.496223 | -4.373989 |
| C  | -3.238531 | -4.035588 | -2.899290 |
| H  | -2.199882 | -4.005178 | -3.261439 |
| C  | -5.882542 | -4.109793 | -1.969611 |

|   |           |           |           |   |           |           |           |
|---|-----------|-----------|-----------|---|-----------|-----------|-----------|
| H | -6.917041 | -4.142021 | -1.594967 | C | 7.255461  | 0.709407  | 2.044659  |
| C | 2.049475  | -4.305975 | 2.208220  | H | 7.858296  | 1.629669  | 2.079106  |
| C | -5.502559 | -4.910861 | -3.058171 | C | -0.635081 | 2.717026  | 4.080621  |
| H | -6.239154 | -5.567951 | -3.544898 | C | 7.826073  | -0.520444 | 2.408982  |
| C | 2.199715  | -4.323447 | 3.611463  | H | 8.876331  | -0.568071 | 2.734445  |
| H | 1.831165  | -3.469359 | 4.199478  | C | 0.096330  | 3.858648  | 4.474641  |
| C | 3.268360  | -6.506007 | 3.499726  | H | 0.943475  | 4.191383  | 3.856301  |
| H | 3.742317  | -7.362663 | 4.002471  | C | -1.350275 | 4.156345  | 6.407629  |
| C | 2.524973  | -5.405394 | 1.461443  | H | -1.628187 | 4.715794  | 7.313733  |
| H | 2.426602  | -5.390986 | 0.365551  | C | -1.734586 | 2.312397  | 4.867965  |
| C | 3.129249  | -6.496675 | 2.102715  | H | -2.309205 | 1.423207  | 4.567506  |
| H | 3.499955  | -7.343578 | 1.505286  | C | -2.087501 | 3.025180  | 6.023307  |
| C | 2.802741  | -5.415950 | 4.251925  | H | -2.943231 | 2.691503  | 6.629860  |
| H | 2.906458  | -5.416606 | 5.347708  | C | -0.258616 | 4.571939  | 5.628737  |
| C | 0.034631  | 3.891022  | 0.031141  | H | 0.318360  | 5.463481  | 5.918236  |
| C | -2.490043 | 1.199256  | -0.809012 | C | -1.355089 | -1.909088 | -3.235864 |
| C | 0.201652  | -3.295187 | 0.855880  | C | 2.013241  | -1.947909 | -1.536676 |
| C | -2.750484 | -0.951281 | -1.195121 | C | 0.976259  | 1.327939  | 2.759405  |
| C | -3.755687 | 1.052515  | -1.488927 | C | 3.287216  | -0.988462 | -0.022209 |
| H | -4.418964 | 1.886649  | -1.745714 | C | 3.347392  | -2.461742 | -1.736613 |
| C | -1.556956 | -2.947964 | -0.428250 | H | 3.621547  | -3.189344 | -2.509407 |
| C | 2.673671  | 0.183000  | 1.175431  | C | 2.792799  | 0.372112  | 1.953252  |
| C | -0.459097 | -4.571652 | 0.698022  | C | -2.120536 | 1.583431  | -0.179322 |
| H | -0.131134 | -5.506421 | 1.162912  | C | 1.983288  | 1.403592  | 3.794339  |
| C | 3.815884  | -0.454120 | 1.786291  | H | 1.830018  | 1.845255  | 4.783773  |
| H | 4.763518  | 0.051226  | 2.006351  | C | -2.935988 | 2.568989  | 0.491324  |
| C | 2.100886  | -1.907763 | 1.542700  | H | -3.850234 | 3.005389  | 0.072341  |
| C | -3.901075 | -0.280307 | -1.766326 | C | -1.167939 | 1.968919  | 1.766260  |
| H | -4.715004 | -0.782496 | -2.298443 | C | 4.149434  | -1.839152 | -0.818044 |
| C | 1.363190  | 3.620885  | 0.332972  | H | 5.228210  | -1.947527 | -0.668865 |
| C | 3.455230  | -1.751642 | 2.033356  | C | -2.296868 | -0.904691 | -3.046836 |
| H | 4.047748  | -2.552668 | 2.486757  | C | -2.356514 | 2.795112  | 1.711488  |
| C | 2.624307  | 1.537533  | 0.880817  | H | -2.680360 | 3.470508  | 2.509814  |
| C | 3.515280  | 2.145076  | 1.088438  | C | -2.493381 | 0.983157  | -1.374738 |
| C | 1.417311  | -3.133091 | 1.534986  | H | -3.412713 | 1.320318  | -1.865119 |
| N | 0.254010  | 1.574036  | 0.188803  | C | -0.272811 | 1.961286  | 2.846044  |
| C | -0.598542 | 5.212010  | -0.130668 | N | -0.610271 | -0.586106 | -1.465785 |
| O | 2.501659  | 4.555775  | 0.614538  | C | -1.255946 | -2.967524 | -4.297549 |
| C | 2.904498  | 4.752895  | 1.743085  | C | -3.506855 | -0.788810 | -3.881575 |
| O | 3.127608  | 5.130999  | -0.438340 | O | -3.831911 | -1.633290 | -4.707572 |
| C | 2.708035  | 4.851656  | -1.789318 | O | -4.227056 | 0.340948  | -3.656723 |
| H | 1.699010  | 5.283452  | -1.951807 | C | -5.406807 | 0.521224  | -4.474390 |
| H | 2.635453  | 3.752622  | -1.939367 | H | -6.055269 | 1.191933  | -3.877444 |
| C | -0.138044 | 7.560799  | -0.086329 | H | -5.908306 | -0.459953 | -4.595687 |
| H | -0.981403 | 7.623790  | -0.803592 | C | -2.984075 | -4.287199 | -3.159646 |
| H | 0.720339  | 8.143445  | -0.473805 | H | -3.122144 | -3.358786 | -2.570259 |
| C | 3.729515  | 5.468636  | -2.724008 | H | -2.565971 | -5.060926 | -2.479340 |
| H | 3.794424  | 6.563602  | -2.568107 | C | -5.062463 | 1.126496  | -5.825117 |
| H | 3.442425  | 5.282646  | -3.777934 | H | -4.516445 | 2.083193  | -5.704903 |
| H | 4.735177  | 5.036208  | -2.553425 | H | -5.991096 | 1.326491  | -6.396915 |
| C | -0.556689 | 8.031327  | 1.296887  | H | -4.438021 | 0.429104  | -6.416020 |
| H | -1.434382 | 7.458474  | 1.654233  | C | -4.288490 | -4.746382 | -3.783987 |
| H | -0.835461 | 9.103983  | 1.265103  | H | -4.691580 | -3.950952 | -4.438879 |
| H | 0.271272  | 7.906419  | 2.022458  | H | -5.030704 | -4.971622 | -2.991567 |
|   |           |           |           | H | -4.134942 | -5.663210 | -4.386727 |

Conformation 34.

Multiplicity: 2

Charge: 0

E(B97-3c) = converged! Hartree

E(M06/def2-TZVP) = -3366.980438631788 Hartree

E(PBE - D3(BJ)/def2-TZVP) = -3365.958970872829 Hartree

E(PBE0 - D3(BJ)/def2-TZVP) = -3366.023597447263 Hartree

E(PBEh-3c) = -3362.566554723307 Hartree

E(PM6) = 73.79551 Kcal/mol

E(PM7) = 105.72296 Kcal/mol

E( $\omega$ B97X-V/def2-TZVP) = -3368.986691458641 Hartree

E(GFN1-xTB) = -130.525908425129 Hartree

E(GFN2-xTB) = -127.361609999001 Hartree

E(GFN-FF) = -15.767266564779 Hartree

Coordinates:

|    |           |           |           |
|----|-----------|-----------|-----------|
| Co | 0.456405  | 0.070127  | 0.070517  |
| N  | 1.984542  | -1.028473 | -0.496935 |
| O  | -0.438382 | -2.865773 | -5.192071 |
| O  | -2.012054 | -4.079357 | -4.202022 |
| C  | -1.817331 | -0.097889 | -1.934763 |
| C  | 3.702315  | -0.319341 | 1.138175  |
| N  | -1.020384 | 1.243376  | 0.594766  |
| C  | 0.930639  | -2.312123 | -2.323452 |
| H  | 1.084868  | -3.077679 | -3.095144 |
| C  | -0.297935 | -1.657618 | -2.287332 |
| C  | 3.120146  | 0.837603  | 3.282104  |
| H  | 4.094634  | 0.709903  | 3.764053  |
| C  | 5.128125  | -0.399012 | 1.570087  |
| N  | 1.466981  | 0.649969  | 1.648966  |
| C  | 5.916829  | 0.770340  | 1.631026  |
| H  | 5.468366  | 1.732663  | 1.341560  |
| C  | 7.049441  | -1.689004 | 2.358871  |
| H  | 7.486792  | -2.655492 | 2.652363  |
| C  | 5.711444  | -1.629554 | 1.942686  |
| H  | 5.098297  | -2.542847 | 1.916557  |

Conformation 7.

Multiplicity: 2

Charge: 0

E(B97-3c) = -3367.153670342082 Hartree

E(M06/def2-TZVP) = -3366.984857878342 Hartree

E(PBE - D3(BJ)/def2-TZVP) = -3365.961870035470 Hartree

E(PBE0 - D3(BJ)/def2-TZVP) = -3366.027239527120 Hartree

E(PBEh-3c) = -3362.571294220884 Hartree

E(PM6) = 71.42599 Kcal/mol

E(PM7) = 116.51352 Kcal/mol

E( $\omega$ B97X-V/def2-TZVP) = -3368.990213927448 Hartree

E(GFN1-xTB) = -130.527586939730 Hartree

E(GFN2-xTB) = -127.364617110551 Hartree

E(GFN-FF) = -15.768817979146 Hartree

Coordinates:

|    |           |           |           |
|----|-----------|-----------|-----------|
| Co | 0.400552  | -0.228915 | -0.264917 |
| N  | -0.959671 | -1.457417 | -0.982371 |
| O  | -2.530867 | -2.954505 | 4.383151  |
| O  | -4.019901 | -1.304826 | 4.273840  |
| C  | -0.169153 | 0.468378  | 2.626349  |
| C  | -0.452600 | -1.344767 | -3.403847 |
| N  | 1.757504  | 1.002164  | 0.436007  |
| C  | -2.080851 | -2.120614 | 1.116262  |
| H  | -2.834015 | -2.777874 | 1.571325  |
| C  | -1.426632 | -1.203269 | 1.935292  |
| C  | 1.703981  | -0.448136 | -4.299980 |
| H  | 1.557179  | -0.779649 | -5.332770 |
| C  | -0.859002 | -1.733986 | -4.786318 |
| N  | 1.240240  | -0.132805 | -2.036424 |
| C  | -0.863505 | -3.085423 | -5.194172 |
| H  | -0.556201 | -3.862075 | -4.477796 |
| C  | -1.606006 | -0.295153 | -7.024975 |
| H  | -1.898967 | -0.310389 | -7.739012 |

|   |           |           |           |   |           |           |           |
|---|-----------|-----------|-----------|---|-----------|-----------|-----------|
| C | -1.230539 | -0.743039 | -5.720283 | H | -5.589749 | -1.640392 | -5.754567 |
| H | -1.227877 | 0.312526  | -5.409063 | C | -4.360474 | -1.137307 | -4.038685 |
| C | -1.237602 | -3.436429 | -6.499594 | H | -3.463781 | -0.931054 | -4.642340 |
| H | -1.229906 | -4.494392 | -6.803214 | C | -6.651746 | -1.621813 | -2.496151 |
| C | 4.651099  | 1.591013  | -1.963142 | H | -7.547672 | -1.813050 | -1.886014 |
| C | -1.612082 | -2.442827 | -7.418138 | C | -2.161052 | 4.851878  | 0.637941  |
| H | -1.905945 | -2.718931 | -8.442161 | C | -6.703312 | -1.776380 | -3.890510 |
| C | 5.841574  | 1.093823  | -1.390583 | H | -7.640124 | -2.085321 | -4.378499 |
| H | 5.777063  | 0.332316  | -0.598698 | C | -1.458603 | 5.976837  | 0.155011  |
| C | 7.172244  | 2.522290  | -2.842002 | H | -0.517206 | 5.823991  | -0.394041 |
| H | 8.153462  | 2.884111  | -3.184811 | C | -3.157309 | 7.464252  | 1.060219  |
| C | 4.743541  | 2.567528  | -2.978220 | H | -3.545365 | 8.480936  | 1.224448  |
| H | 3.819637  | 2.973440  | -3.416968 | C | -3.367764 | 5.056693  | 1.340842  |
| C | 5.994396  | 3.028720  | -3.414093 | H | -3.912348 | 4.185744  | 1.735562  |
| H | 6.048770  | 3.794592  | -4.202794 | C | -3.861676 | 6.352747  | 1.549703  |
| C | 7.091975  | 1.554531  | -1.828249 | H | -4.801241 | 6.495451  | 2.105054  |
| H | 8.010720  | 1.151427  | -1.375588 | C | -1.954058 | 7.272399  | 0.363008  |
| C | -1.792917 | -0.969154 | 3.310354  | H | -1.396636 | 8.138422  | -0.025258 |
| C | -1.895654 | -2.183619 | -0.257388 | C | 3.356087  | -1.880394 | -1.949587 |
| C | 2.492576  | 0.381769  | -2.350829 | C | 0.151345  | -2.135327 | -1.823169 |
| C | -1.225299 | -1.759861 | -2.309394 | C | -2.318463 | 2.570026  | -0.381173 |
| C | -2.751579 | -2.945808 | -1.135124 | C | -1.908211 | -1.384318 | -2.002035 |
| H | -3.569448 | -3.592490 | -0.796311 | C | -0.557831 | -3.075126 | -2.658295 |
| C | 0.746659  | -0.636804 | -3.232679 | H | -0.112416 | -3.977636 | -3.093111 |
| C | 1.740377  | 1.652171  | 1.662543  | C | -2.991104 | 0.724886  | -1.382837 |
| C | 2.801364  | 0.153232  | -3.744983 | C | 1.279730  | 1.973184  | 1.852620  |
| H | 3.743860  | 0.427827  | -4.228529 | C | -3.606700 | 2.859839  | -0.970336 |
| C | 2.884888  | 2.522074  | 1.800773  | H | -4.109072 | 3.830976  | -0.924921 |
| H | 3.082054  | 3.148135  | 2.678707  | C | 1.251653  | 3.214962  | 2.589098  |
| C | 2.920228  | 1.434673  | -0.181405 | H | 1.974617  | 3.487591  | 3.366678  |
| C | -2.363452 | -2.650709 | -2.414641 | C | -0.438377 | 3.114463  | 1.090845  |
| H | -2.791611 | -3.007284 | -3.356553 | C | -1.850275 | -2.630191 | -2.739356 |
| C | -1.014682 | 0.095767  | 3.746691  | H | -2.697946 | -3.086687 | -3.259769 |
| C | 3.632937  | 2.371425  | 0.664001  | C | 3.568160  | -0.964891 | 1.170443  |
| H | 4.574386  | 2.859728  | 0.392751  | C | 0.194744  | 3.936341  | 2.102609  |
| C | 0.823869  | 1.441325  | 2.683712  | H | -0.154717 | 4.929145  | 2.403566  |
| H | 0.923240  | 2.001806  | 3.621966  | C | 2.295690  | 1.037382  | 1.989420  |
| C | 3.326562  | 1.100213  | -1.481279 | H | 3.095537  | 1.212483  | 2.720475  |
| N | -0.439386 | -0.322478 | 1.524877  | C | -1.615781 | 3.479172  | 0.423021  |
| C | -2.786560 | -1.816653 | 4.046501  | N | 1.515924  | -0.448089 | 0.189523  |
| C | -1.005643 | 0.713371  | 5.085223  | C | 4.258319  | -2.958003 | -0.375920 |
| O | -0.305534 | 1.648864  | 5.449870  | C | 4.734679  | -0.884035 | 2.068875  |
| O | -1.910381 | 0.097924  | 5.896879  | O | 4.994660  | 0.017972  | 2.852028  |
| C | -2.042127 | 0.610095  | 7.238548  | O | 5.518261  | -1.986305 | 1.916778  |
| H | -1.042470 | 0.929182  | 7.596181  | C | 6.740304  | -2.031644 | 2.678559  |
| H | -2.386698 | -0.256674 | 7.835027  | H | 6.504556  | -1.849232 | 3.748270  |
| C | -4.378002 | 0.005123  | 3.791284  | H | 7.395102  | -1.197095 | 2.347956  |
| H | -4.228511 | 0.050706  | 2.690433  | C | 3.380421  | -4.385755 | 1.381811  |
| H | -3.716458 | 0.764692  | 4.254824  | H | 2.321143  | -4.182869 | 1.111781  |
| C | -3.032727 | 1.762179  | 7.296644  | H | 3.670055  | -3.677385 | 2.184493  |
| H | -2.666427 | 2.621982  | 6.702241  | C | 7.376490  | -3.386090 | 2.441797  |
| H | -3.161332 | 2.100741  | 8.344530  | H | 6.720533  | -4.203685 | 2.802529  |
| H | -4.025785 | 1.454975  | 6.910872  | H | 8.340948  | -3.452430 | 2.982864  |
| C | -5.826690 | 0.248751  | 4.164763  | H | 7.566273  | -3.549799 | 1.362790  |
| H | -6.488473 | -0.516434 | 3.713415  | C | 3.571725  | -5.823446 | 1.821890  |
| H | -6.150007 | 1.246970  | 3.808764  | H | 3.296590  | -6.526942 | 1.011465  |
| H | -5.957761 | 0.210828  | 5.264699  | H | 2.937229  | -6.040049 | 2.704002  |
|   |           |           |           | H | 4.628775  | -6.012014 | 2.096522  |

Conformation 8.  
Multiplicity: 2  
Charge: 0

E(B97-3c) = -3367.154119375566 Hartree  
E(M06/def2-TZVP) = -3366.985739053207 Hartree  
E(PBE - D3(BJ)/def2-TZVP) = -3365.962259767386 Hartree  
E(PBE0 - D3(BJ)/def2-TZVP) = -3366.027980937023 Hartree  
E(PBEh-3c) = -3362.572047966654 Hartree  
E(PM6) = 72.23415 Kcal/mol  
E(PM7) = 116.67385 Kcal/mol  
E( $\omega$ B97X-V/def2-TZVP) = -3368.991576301752 Hartree  
E(GFN1-xTB) = -130.526583704417 Hartree  
E(GFN2-xTB) = -127.364666652091 Hartree  
E(GFN-FF) = -15.768569036261 Hartree

Coordinates:

|    |           |           |           |
|----|-----------|-----------|-----------|
| Co | -0.217741 | 0.406859  | -0.238094 |
| N  | -0.681461 | -1.099115 | -1.420832 |
| O  | 4.963679  | -2.785479 | -1.347956 |
| O  | 4.223327  | -4.167893 | 0.231610  |
| C  | 2.422518  | -0.073979 | 1.163685  |
| N  | -3.034765 | -0.550293 | -1.965944 |
| C  | 0.229330  | 1.908412  | 0.947436  |
| C  | 1.465009  | -2.322431 | -1.416202 |
| H  | 2.023251  | -3.169828 | -1.837340 |
| C  | 2.079808  | -1.549689 | -0.434597 |
| C  | -4.038487 | 1.705101  | -1.565093 |
| H  | -4.966210 | 1.528037  | -2.118214 |
| C  | -4.295954 | -0.983148 | -2.637040 |
| N  | -1.932913 | 1.264476  | -0.663090 |
| C  | -5.458304 | -1.226503 | -1.874289 |
| H  | -5.414855 | -1.106416 | -0.781253 |
| C  | -5.554784 | -1.531071 | -4.659874 |

## YIKLUC

Conformation 15.

Multiplicity: 2Charge: 0

E(B97-3c) = -2948.798826903968 Hartree  
E(M06/def2-TZVP) = -2948.910938074289 Hartree  
E(PBE - D3(BJ)/def2-TZVP) = -2947.690999370790 Hartree  
E(PBE0 - D3(BJ)/def2-TZVP) = -2947.965475922643 Hartree  
E(PBEh-3c) = -2944.948574562258 Hartree  
E(PM6) = -240.82987 Kcal/mol  
E(PM7) = -237.54253 Kcal/mol  
E( $\omega$ B97X-V/def2-TZVP) = -2949.536671886141 Hartree  
E(GFN1-xTB) = -184.761142349843 Hartree  
E(GFN2-xTB) = -119.355662246845 Hartree  
E(GFN-FF) = -16.235874247916 Hartree

Coordinates:

|    |           |           |           |
|----|-----------|-----------|-----------|
| Ti | -0.249646 | 0.084504  | 0.330300  |
| Si | -2.589284 | -1.741210 | 2.160932  |
| Si | -1.869116 | 1.344554  | 2.851139  |
| O  | 1.088659  | -1.168665 | 0.369543  |
| O  | -0.608686 | 1.368743  | -0.923206 |
| C  | -1.870596 | -0.081500 | 1.597721  |
| H  | -2.584681 | 0.271314  | 0.806976  |
| C  | 2.190835  | -1.937049 | 0.202094  |
| C  | 3.066473  | -2.128318 | 1.320159  |
| C  | 4.214227  | -2.918016 | 1.121607  |
| H  | 4.908695  | -3.080191 | 1.954916  |
| C  | 4.501742  | -3.502719 | -0.114222 |
| H  | 5.408190  | -4.113213 | -0.239942 |
| C  | 3.630435  | -3.309910 | -1.189050 |



|   |           |           |           |                                                            |
|---|-----------|-----------|-----------|------------------------------------------------------------|
| H | 3.871768  | -3.779144 | -2.150795 | E(B97-3c) = -2948.799008603179 Hartree                     |
| C | 2.460663  | -2.534569 | -1.073157 | E(M06/def2-TZVP) = -2948.911594541606 Hartree              |
| C | 2.791324  | -1.502470 | 2.706419  | E(PBE - D3(BJ)/def2-TZVP) = -2947.691071045034 Hartree     |
| C | 3.868660  | -1.896699 | 3.737898  | E(PBE0 - D3(BJ)/def2-TZVP) = -2947.965841782781 Hartree    |
| H | 3.921258  | -2.993843 | 3.885548  | E(PBEh-3c) = -2944.948731135618 Hartree                    |
| H | 3.616088  | -1.440441 | 4.716031  | E(PM6) = -242.13411 Kcal/mol                               |
| H | 4.876558  | -1.533218 | 3.453147  | E(PM7) = -237.72387 Kcal/mol                               |
| C | 2.807556  | 0.040522  | 2.615161  | E( $\omega$ B97X-V/def2-TZVP) = -2949.536955821065 Hartree |
| H | 3.753685  | 0.399782  | 2.162840  | E(GFN1-xTB) = -185.525070356678 Hartree                    |
| H | 2.720559  | 0.486169  | 3.627622  | E(GFN2-xTB) = -119.357568975882 Hartree                    |
| H | 1.970853  | 0.430090  | 2.004676  | E(GFN-FF) = -16.238101160526 Hartree                       |
| C | 1.436381  | -1.997178 | 3.261166  |                                                            |
| H | 0.590871  | -1.703410 | 2.614985  | Coordinates:                                               |
| H | 1.256198  | -1.569457 | 4.268689  | Ti -0.193762 -0.234261 -0.368563                           |
| H | 1.430517  | -3.102263 | 3.350351  | Si -2.907316 -2.436706 -0.123707                           |
| C | 1.523314  | -2.376674 | -2.292953 | Si -1.433031 -1.633432 -2.915310                           |
| C | 2.019228  | -3.181245 | -3.512112 | O -1.050667 1.155490 0.461925                              |
| H | 3.012531  | -2.840477 | -3.867735 | O 1.584841 -0.694562 -0.388553                             |
| H | 1.305041  | -3.043453 | -4.348750 | C -1.367854 -1.367854 -1.022805                            |
| H | 2.077459  | -4.267635 | -3.299934 | H -0.588973 -2.593033 -0.858280                            |
| C | 1.449354  | -0.900136 | -2.737741 | C -1.262913 2.295643 1.163941                              |
| H | 1.048923  | -0.238173 | -1.949968 | C -1.883367 3.407537 0.505737                              |
| H | 0.783912  | -0.791528 | -3.618220 | C -2.034687 4.594832 1.246500                              |
| H | 2.452161  | -0.519980 | -3.017497 | H -2.494969 5.471375 0.774512                              |
| C | 0.115470  | -2.909335 | -1.950253 | C -1.620472 4.694043 2.577319                              |
| H | 0.162307  | -3.969430 | -1.630278 | H -1.751032 5.637476 3.128151                              |
| H | -0.549458 | -2.843212 | -2.835604 | C -1.055030 3.584419 3.210060                              |
| H | -0.351137 | -2.334373 | -1.130807 | H -0.754977 3.676278 4.261112                              |
| C | -0.526898 | 2.038195  | -2.095447 | C -0.861729 2.362484 2.538323                              |
| C | -1.626843 | 1.934616  | -3.014060 | C -2.418188 3.330528 -0.943770                             |
| C | -1.521558 | 2.616748  | -4.237519 | C -3.087473 4.649712 -1.379161                             |
| H | -2.337570 | 2.551230  | -4.968019 | H -3.950570 4.914413 -0.736162                             |
| C | -0.398791 | 3.390736  | -4.553272 | H -3.467310 4.537941 -2.414518                             |
| H | -0.343242 | 3.919345  | -5.516474 | H -2.377170 5.500855 -1.377028                             |
| C | 0.646795  | 3.491017  | -3.636752 | C -1.281289 3.057528 -1.952131                             |
| H | 1.512243  | 4.119300  | -3.891685 | H -0.501936 3.843128 -1.894173                             |
| C | 0.630847  | 2.818094  | -2.396138 | H -1.682304 3.046226 -2.986906                             |
| C | -2.900782 | 1.123339  | -2.682538 | H -0.793626 2.081140 -1.773287                             |
| C | -3.574336 | 1.706251  | -1.417724 | C -3.487054 2.221070 -1.038742                             |
| H | -4.456426 | 1.095661  | -1.131700 | H -3.063923 1.229720 -0.804947                             |
| H | -3.921383 | 2.742269  | -1.605839 | H -3.915040 2.186402 -2.062217                             |
| H | -2.877439 | 1.733422  | -0.561751 | H -4.317266 2.410817 -0.329085                             |
| C | -2.566252 | -0.372408 | -2.485183 | C -0.235305 1.163411 3.288336                              |
| H | -1.890142 | -0.547419 | -1.626034 | C -0.033959 1.463788 4.787950                              |
| H | -2.072503 | -0.787359 | -3.386328 | H 0.677737 2.295931 4.958771                               |
| H | -3.492409 | -0.955659 | -2.302059 | H 0.386015 0.565370 5.282993                               |
| C | -3.938593 | 1.195587  | -3.821070 | C -0.988636 1.709986 5.294348                              |
| H | -4.838048 | 0.616407  | -3.530972 | H 1.162076 0.848493 2.710778                               |
| H | -3.555212 | 0.760383  | -4.765873 | H 1.139953 0.591229 1.636026                               |
| H | -4.263774 | 2.235701  | -4.023290 | H 1.623242 -0.013469 3.234739                              |
| C | 1.848831  | 3.073969  | -1.467306 | H 1.837551 1.719868 2.823874                               |
| C | 3.161801  | 2.868708  | -2.263184 | C -1.160693 -0.072165 3.208542                             |
| H | 3.232675  | 1.828177  | -2.639333 | H -2.149243 0.151269 3.658123                              |
| H | 4.034725  | 3.055234  | -1.604759 | H -0.714705 -0.923547 3.763055                             |
| H | 3.253770  | 3.548643  | -3.131168 | H -1.334888 -0.400412 2.167673                             |
| C | 1.760095  | 4.538985  | -0.975417 | C 2.887461 -0.783381 -0.030668                             |
| H | 1.749295  | 5.253553  | -1.821800 | C 3.364303 -2.037216 0.486772                              |
| H | 2.626580  | 4.786222  | -0.327269 | C 4.710221 -2.120587 0.877781                              |
| H | 0.833175  | 4.697074  | -0.387647 | H 5.100052 -3.062896 1.282083                              |
| C | 1.976311  | 2.178447  | -0.220629 | C 5.577064 -1.028289 0.762668                              |
| H | 1.155772  | 2.340232  | 0.504495  | H 6.628583 -1.118533 1.073366                              |
| H | 2.918771  | 2.427485  | 0.307726  | C 5.098451 0.172008 0.241529                               |
| H | 2.045673  | 1.103120  | -0.482143 | H 5.796509 1.015225 0.139899                               |
| C | -1.902705 | -3.199942 | 1.159474  | C 3.757267 0.342365 -0.165653                              |
| H | -2.146736 | -3.093416 | 0.082920  | C 2.443903 -3.269629 0.612987                              |
| H | -2.355301 | -4.150033 | 1.513343  | C 3.194998 -4.501566 1.157979                              |
| H | -0.801771 | -3.291017 | 1.250209  | H 2.494518 -5.359274 1.209713                              |
| C | -2.291189 | -2.117339 | 3.997943  | H 3.587132 -4.333183 2.180996                              |
| H | -1.212140 | -2.177984 | 4.240822  | H 4.039560 -4.801489 0.505687                              |
| H | -2.748309 | -3.098544 | 4.243275  | C 1.903272 -3.660638 -0.783563                             |
| H | -2.751466 | -1.358248 | 4.661701  | H 2.733318 -4.007484 -1.431518                             |
| C | -4.465466 | -1.686794 | 1.856244  | H 1.415927 -2.810572 -1.291311                             |
| H | -4.944265 | -0.872517 | 2.436681  | H 1.167875 -4.487823 -0.699284                             |
| H | -4.948279 | -2.644422 | 2.142782  | H 1.301534 -2.982541 1.614270                              |
| H | -4.680289 | -1.506774 | 0.781734  | C 0.649826 -3.872683 1.723719                              |
| C | -3.593062 | 1.553739  | 3.625474  | H 0.658065 -2.134869 1.309613                              |
| H | -4.354600 | 1.756372  | 2.844678  | H 1.718419 -2.739461 2.612615                              |
| H | -3.596121 | 2.408393  | 4.333649  | C 3.415385 1.725354 -0.782298                              |
| H | -3.910446 | 0.649597  | 4.182476  | C 3.869124 2.850542 0.179845                               |
| C | -1.460691 | 3.001242  | 2.004193  | H 3.334045 2.778763 1.148211                               |
| H | -0.400624 | 3.065935  | 1.684163  | H 3.639550 3.841199 -0.263315                              |
| H | -1.640725 | 3.832568  | 2.717881  | H 4.955204 2.825849 0.389601                               |
| H | -2.091870 | 3.178342  | 1.109937  | C 4.185704 1.844825 -2.120122                              |
| C | -0.605425 | 1.078232  | 4.236954  | H 5.278448 1.734016 -1.977372                              |
| H | -0.807076 | 0.149966  | 4.805436  | H 4.000029 2.833870 -2.588829                              |
| H | -0.639469 | 1.930424  | 4.947053  | H 3.858061 1.059914 -2.831748                              |
| H | 0.423615  | 1.011717  | 3.832402  | C 1.933432 2.000162 -1.087299                              |
|   |           |           |           | H 1.522008 1.304739 -1.842804                              |
|   |           |           |           | H 1.837165 3.022390 -1.505212                              |
|   |           |           |           | H 1.307133 1.981510 -0.173476                              |
|   |           |           |           | C -2.373602 -3.326228 1.465368                             |

Conformation 18.  
 Multiplicity: 2  
 Charge: 0

|   |           |           |           |
|---|-----------|-----------|-----------|
| H | -1.722004 | -4.193463 | 1.232421  |
| H | -3.265441 | -3.709506 | 2.003585  |
| H | -1.818457 | -2.660570 | 2.154568  |
| C | -4.120327 | -1.055799 | 0.332238  |
| H | -3.645715 | -0.284761 | 0.971521  |
| H | -4.977521 | -1.485291 | 0.891362  |
| H | -4.523893 | -0.549884 | -0.567168 |
| C | -3.871419 | -3.726317 | -1.140920 |
| H | -4.259820 | -3.316690 | -2.095074 |
| H | -4.741264 | -4.089302 | -0.554269 |
| H | -3.236815 | -4.603985 | -1.380394 |
| C | -1.283777 | -3.345615 | -3.720205 |
| H | -0.345282 | -3.841828 | -3.396740 |
| H | -1.259072 | -3.256101 | -4.826352 |
| H | -2.130661 | -4.003914 | -3.444531 |
| C | 0.039909  | -0.616753 | -3.588655 |
| H | -0.054106 | 0.467645  | -3.370865 |
| H | 0.077553  | -0.723221 | -4.694324 |
| H | 1.013729  | -0.966823 | -3.187538 |
| C | -3.016714 | -0.768953 | -3.488691 |
| H | -3.926809 | -1.315855 | -3.170893 |
| H | -3.033333 | -0.695248 | -4.595680 |
| H | -3.078769 | 0.257754  | -3.077069 |

Conformation 19.

Multiplicity: 2

Charge: 0

E(B97-3c) = -2948.800186434236 Hartree  
 E(M06/def2-TZVP) = -2948.912489165615 Hartree  
 E(PBE - D3(BJ)/def2-TZVP) = -2947.691353850068 Hartree  
 E(PBE0 - D3(BJ)/def2-TZVP) = -2947.966681188626 Hartree  
 E(PBEh-3c) = -2944.950971498311 Hartree  
 E(PM6) = -242.72091 Kcal/mol  
 E(PM7) = -239.10820 Kcal/mol  
 E(ωB97X-V/def2-TZVP) = -2950.750865069244 Hartree  
 E(GFN1-xTB) = -184.901846225052 Hartree  
 E(GFN2-xTB) = -119.360676620274 Hartree  
 E(GFN-FF) = -16.240378744308 Hartree

Coordinates:

|    |           |           |           |
|----|-----------|-----------|-----------|
| Ti | -0.390808 | -0.291344 | -0.073004 |
| Si | -0.568328 | -3.592821 | -0.890954 |
| Si | -3.188564 | -2.000989 | 0.124707  |
| O  | 1.119519  | -0.512770 | 0.926182  |
| O  | -0.809368 | 1.264090  | -0.926158 |
| C  | -1.482006 | -1.949682 | -0.704704 |
| H  | -1.695555 | -1.587326 | -1.741613 |
| C  | 2.176864  | -0.322238 | 1.747527  |
| C  | 1.986327  | -0.380942 | 3.161136  |
| C  | 3.125164  | -0.189591 | 3.972201  |
| H  | 3.017020  | -0.243453 | 5.065365  |
| C  | 4.386680  | 0.065707  | 3.436769  |
| H  | 5.251035  | 0.216017  | 4.100715  |
| C  | 4.544653  | 0.130791  | 2.047670  |
| H  | 5.542359  | 0.336453  | 1.640648  |
| C  | 3.464638  | -0.061047 | 1.169700  |
| O  | 0.659661  | -0.673855 | 3.911861  |
| C  | -0.620754 | -0.743085 | 3.058665  |
| H  | -0.824944 | 0.216169  | 2.539375  |
| H  | -1.486059 | -0.936597 | 3.725598  |
| H  | -0.588576 | -1.566620 | 2.319971  |
| C  | 0.806330  | -2.040872 | 4.623618  |
| H  | 0.971407  | -2.850925 | 3.884280  |
| H  | -0.112007 | -2.279174 | 5.200007  |
| H  | 1.661861  | -2.046831 | 5.326976  |
| C  | 0.413043  | 0.439576  | 4.959895  |
| H  | 1.227896  | 0.513772  | 5.704595  |
| H  | -0.527558 | 0.239667  | 5.513588  |
| H  | 0.316780  | 1.427543  | 4.464693  |
| C  | 3.687545  | -0.001470 | -0.358748 |
| C  | 5.169801  | 0.230347  | -0.716652 |
| H  | 5.549957  | 1.199219  | -0.334909 |
| H  | 5.275538  | 0.246946  | -1.819891 |
| C  | 5.823706  | -0.578319 | -0.333117 |
| H  | 2.893118  | 1.168291  | -0.983356 |
| H  | 1.802389  | 1.077874  | -0.831742 |
| H  | 3.069132  | 1.211834  | -2.077531 |
| H  | 3.208181  | 2.136400  | -0.546073 |
| C  | 3.277725  | -1.344039 | -1.002979 |
| H  | 3.881738  | -2.177954 | -0.591399 |
| H  | 3.440274  | -1.310674 | -2.100289 |
| H  | 2.214398  | -1.578260 | -0.822028 |
| C  | -0.730675 | 2.455129  | -1.565689 |
| C  | -0.609404 | 3.660438  | -0.802592 |
| C  | -0.468946 | 4.862829  | -1.521744 |
| H  | -0.359905 | 5.808638  | -0.976714 |
| C  | -0.459486 | 4.892665  | -2.919053 |
| H  | -0.334511 | 5.848613  | -3.449548 |
| C  | -0.623102 | 3.706608  | -3.640493 |
| H  | -0.633672 | 3.753651  | -4.736621 |
| C  | -0.775082 | 2.464852  | -2.997011 |

|   |           |           |           |
|---|-----------|-----------|-----------|
| C | -0.639851 | 3.684820  | 0.744341  |
| C | -1.932203 | 3.020552  | 1.268756  |
| H | -1.956947 | 3.055807  | 2.377812  |
| H | -2.012308 | 1.964143  | 0.958923  |
| H | -2.829171 | 3.549820  | 0.888301  |
| C | -0.628827 | 5.126371  | 1.293967  |
| H | -1.493545 | 5.716783  | 0.930164  |
| H | 0.300728  | 5.670960  | 1.033278  |
| H | -0.689421 | 5.092798  | 2.400357  |
| C | 0.601829  | 2.974723  | 1.326466  |
| H | 0.587520  | 3.018852  | 2.435342  |
| H | 1.536340  | 3.456649  | 0.977269  |
| H | 0.657348  | 1.909252  | 1.042872  |
| C | -1.005403 | 1.178938  | -3.823541 |
| C | 0.162964  | 0.182827  | -3.635285 |
| H | 1.119759  | 0.642188  | -3.955594 |
| H | -0.003562 | -0.727861 | -4.246766 |
| H | 0.291031  | -0.146231 | -2.584862 |
| C | -2.361210 | -0.574879 | -3.422361 |
| H | -2.422303 | 0.346604  | -2.338753 |
| H | -2.520485 | -0.408644 | -3.963103 |
| H | -3.194117 | 1.230595  | -3.685512 |
| C | -1.084682 | 1.473421  | -5.335734 |
| H | -1.904561 | 2.177743  | -5.581017 |
| H | -1.283635 | 0.528383  | -5.880281 |
| H | -0.136485 | 1.889053  | -5.732196 |
| C | 0.564035  | -3.497461 | -2.412238 |
| H | -0.047659 | -3.358579 | -3.328370 |
| H | 1.138975  | -4.439555 | -2.531426 |
| C | 1.287357  | -2.661568 | -2.360049 |
| H | 0.436084  | -3.975957 | 0.672411  |
| H | 1.168046  | -3.173065 | 0.892942  |
| H | 0.990882  | -4.929960 | 0.559364  |
| H | -0.233214 | -4.078247 | 1.551473  |
| C | -1.720921 | -5.070663 | -1.227408 |
| H | -2.442061 | -5.259560 | -0.407963 |
| H | -1.114765 | -5.991295 | -1.360395 |
| H | -2.300199 | -4.913283 | -2.160290 |
| C | -3.235178 | -3.145422 | 1.637879  |
| H | -3.024704 | -4.199827 | 1.371756  |
| H | -4.246514 | -3.109275 | 2.093178  |
| H | -2.506689 | -2.838179 | 2.413529  |
| C | -4.488608 | -2.577730 | -1.133646 |
| H | -4.509797 | -1.900594 | -2.012864 |
| H | -5.501523 | -2.574338 | -0.679045 |
| H | -4.278375 | -3.602488 | -1.498609 |
| C | -3.746425 | -0.278051 | 0.714516  |
| H | -3.150237 | 0.086795  | 1.575709  |
| H | -4.805580 | -0.323329 | 1.045960  |
| H | -3.682389 | 0.480094  | -0.092876 |

Conformation 27.

Multiplicity: 2

Charge: 0

E(B97-3c) = -2948.803891329012 Hartree  
 E(M06/def2-TZVP) = -2948.915175095847 Hartree  
 E(PBE - D3(BJ)/def2-TZVP) = -2947.695438774124 Hartree  
 E(PBE0 - D3(BJ)/def2-TZVP) = -2947.969672993215 Hartree  
 E(PBEh-3c) = -2944.95295564924 Hartree  
 E(PM6) = -241.69681 Kcal/mol  
 E(PM7) = -239.68146 Kcal/mol  
 E(ωB97X-V/def2-TZVP) = -2950.752305316419 Hartree  
 E(GFN1-xTB) = -184.829154260005 Hartree  
 E(GFN2-xTB) = -119.364115948828 Hartree  
 E(GFN-FF) = -16.239977096284 Hartree

Coordinates:

|    |           |           |           |
|----|-----------|-----------|-----------|
| Ti | -0.446714 | -0.113517 | 0.145374  |
| Si | -3.299243 | 1.362745  | 1.370323  |
| Si | -3.203310 | -1.756519 | 0.509448  |
| O  | -0.201063 | 1.121250  | -1.183512 |
| O  | 0.821936  | -1.181061 | 0.928959  |
| C  | -2.279305 | -0.209168 | 1.108601  |
| H  | -1.890764 | -0.503904 | 2.115017  |
| C  | 0.493825  | 1.757680  | -2.164881 |
| C  | 0.251433  | 1.393883  | -3.527856 |
| C  | 1.024215  | 2.034615  | -4.515153 |
| H  | 0.871435  | 1.777907  | -5.570548 |
| C  | 1.989737  | 2.991739  | -4.192130 |
| H  | 2.584700  | 3.466119  | -4.986672 |
| C  | 2.181123  | 3.356999  | -2.857023 |
| H  | 2.928400  | 4.126224  | -2.626825 |
| C  | 1.439972  | 2.774024  | -1.811179 |
| C  | -0.822855 | 0.359735  | -3.938900 |
| C  | -0.948650 | 0.241151  | -5.471393 |
| H  | -1.232066 | 1.202852  | -5.944231 |
| H  | -1.740448 | -0.495774 | -5.713371 |
| H  | -0.011213 | -0.115983 | -5.942236 |
| C  | -0.459270 | -1.049150 | -3.418689 |
| H  | 0.508864  | -1.375479 | -3.847339 |
| H  | -1.234766 | -1.784602 | -3.717228 |

```

H      -0.372934      -1.088210      -2.314098      E(GFN-FF) = -16.231355531878 Hartree
C      -2.206810      0.792353      -3.406104
H      -2.238800      0.837214      -2.304224      Coordinates:
H      -2.985221      0.079349      -3.748850      Ti      -0.300105      -0.208153      0.134316
H      -2.474783      1.797163      -3.790261      Si      -0.795552      -2.750629      2.316985
C      1.676720      3.257627      -0.358394      Si      -2.881174      -0.336303      2.315353
C      2.634621      4.462607      -0.283992      O      1.130723      0.616398      0.946917
H      3.651629      4.208311      -0.644021      O      -0.793835      -0.264188      -1.635990
H      2.729161      4.782583      0.772920      C      -1.581653      -1.328620      1.338198
H      2.263292      5.330176      -0.865413      H      -2.150658      -1.817856      0.505937
C      2.319042      2.125754      0.474073      C      2.233260      1.403534      1.071460
H      1.663407      1.235566      0.528129      C      3.541053      0.824319      1.134940
H      2.514594      2.461398      1.512933      C      4.637419      1.711667      1.196291
H      3.277862      1.796518      0.028801      H      5.652839      1.295694      1.251833
C      0.334370      3.706858      0.263759      C      4.486082      3.095984      1.204145
C      -0.094629      4.548684      -0.316588      H      5.367831      3.752790      1.240956
H      0.489589      4.054680      1.305950      C      3.198543      3.639968      1.191995
H      -0.411754      2.894232      0.275769      H      3.087871      4.730350      1.229641
C      1.997180      -1.598879      1.469763      C      2.052787      2.828676      1.142517
C      2.132646      -1.498710      2.896554      C      3.897909      -0.680989      1.259048
C      3.371493      -1.863245      3.457723      C      4.339073      -0.928427      2.723002
H      3.518330      -1.786305      4.541783      H      5.210802      -0.303182      3.000762
C      4.427033      -2.334800      2.672384      H      4.618099      -1.993259      2.868149
H      5.384099      -2.613197      3.138587      H      3.514508      -0.692294      3.425369
C      4.254398      -2.473624      1.293606      C      2.762664      -1.666257      0.948555
H      5.082831      -2.867364      0.692175      H      1.937237      -1.582164      1.671216
C      3.050740      -2.120142      0.655849      H      3.154235      -2.702268      1.012333
C      0.979450      -1.050774      3.816768      H      2.359076      -1.527196      -0.069358
C      1.373716      -1.118462      5.309804      C      5.063993      -1.042959      0.307188
H      0.505087      -0.814686      5.927674      H      4.791555      -0.841128      -0.748449
H      2.208807      -0.432339      5.555521      H      5.296195      -2.123626      0.397683
H      1.660074      -2.143636      5.618725      H      5.997014      -0.490161      0.526524
C      -0.221106      -2.011583      3.640800      C      0.655918      3.485159      1.209887
H      0.047433      -3.028465      3.986072      C      0.741867      5.014819      1.394779
H      -0.541796      -2.091356      2.587760      H      1.279335      5.292856      2.323170
H      -1.086067      -1.665021      4.244041      H      -0.284312      5.427563      1.467612
C      0.588999      0.421446      3.562094      H      1.238837      5.515608      0.539913
H      -0.233644      0.729796      4.238727      C      -0.111461      2.936058      2.435079
H      0.233899      0.616024      2.530407      H      -0.250154      1.840805      2.387691
H      1.457442      1.086551      3.740146      H      -1.111608      3.408805      2.512743
C      2.902902      -2.312197      -0.873225      H      0.446010      3.163808      3.365841
C      2.747705      -0.939292      -1.561975      C      -0.120332      3.255944      -0.103866
H      1.835588      -0.405020      -1.246141      H      0.445497      3.648423      -0.972219
H      2.692118      -1.059097      -2.663062      H      -1.106749      3.762195      -0.074504
H      3.611278      -0.284167      -1.333929      H      -0.319849      2.183901      -0.304450
C      4.140634      -2.988550      -1.493566      C      -0.933822      -0.280262      -2.988208
H      5.054800      -2.370978      -1.384555      C      0.172140      -0.678885      -3.809476
H      3.967095      -3.134124      -2.578716      C      -0.013403      -0.689938      -5.204338
H      4.337457      -3.984924      -1.049927      H      0.816398      -0.990302      -5.855505
C      1.691147      -3.226376      -1.162314      C      -1.228733      -0.332034      -5.790846
H      1.861929      -4.238350      -0.742075      H      -1.344565      -0.351894      -6.884775
H      1.532720      -3.332739      -2.255379      C      -2.296196      0.050450      -4.976279
H      0.762356      -2.832716      -0.714797      H      -3.244600      0.329294      -5.451044
C      -3.493859      2.318534      -0.246928      C      -2.189700      0.091184      -3.573278
H      -2.512474      2.616578      -0.664975      C      1.529066      -1.116197      -3.220312
H      -4.098924      3.230210      -0.078000      C      2.548456      -1.494417      -4.314928
H      -4.031162      1.727816      -1.017853      H      3.499119      -1.797954      -3.832031
C      -5.033736      1.041796      2.082862      H      2.775939      -0.643947      -4.988382
H      -5.666998      0.420826      1.417927      H      2.204343      -2.347011      -4.933659
H      -5.554814      2.011627      2.228033      C      1.320360      -2.385134      -2.362433
H      -4.974981      0.543118      3.072011      H      0.893574      -3.197900      -2.983657
C      -2.414211      2.453863      2.647437      H      0.622150      -2.216345      -1.519398
H      -2.354124      1.937232      3.627339      H      2.282375      -2.743582      -1.944076
H      -2.972094      3.401042      2.801449      C      2.166305      0.046907      -2.426636
H      -1.383488      2.714103      2.337120      H      3.150530      -0.248633      -2.011891
C      -4.395158      -1.367014      -0.911361      H      1.548395      0.000502      -1.581227
H      -5.168669      -0.629733      -0.617183      H      2.326977      0.919029      -3.091307
H      -4.914188      -2.292855      -1.234248      C      -3.398756      0.556853      -2.734816
H      -3.850759      -0.956489      -1.785069      C      -4.629016      0.873814      -3.609182
C      -4.153874      -2.531971      1.959670      H      -4.436193      1.699743      -4.322631
H      -3.465980      -2.750991      2.802624      H      -5.464123      1.192417      -2.953464
H      -4.623243      -3.488357      1.647965      H      -4.975007      -0.009445      -4.182680
H      -4.949493      -1.861369      2.339838      C      -3.828636      -0.553395      -1.750302
C      -2.030213      -3.125915      -0.105448      H      -4.114713      -1.470665      -2.303678
H      -1.497339      -2.879355      -1.051793      H      -4.707722      -0.227448      -1.156455
H      -2.622707      -4.045796      -0.299538      H      -3.020852      -0.818794      -1.047845
H      -1.261613      -3.384228      0.651870      C      -3.024518      1.860496      -1.996708
                                           H      -2.187583      1.709896      -1.293393
                                           H      -3.889109      2.248394      -1.420423
                                           H      -2.722970      2.639763      -2.725529
                                           C      -2.082937      -3.820682      3.221646
                                           H      -2.619746      -3.260734      4.013373
                                           H      -1.572978      -4.680274      3.705737
                                           H      -2.836961      -4.227523      2.517182
                                           C      0.065975      -3.937705      1.108648
                                           H      -0.683690      -4.385468      0.423097
                                           H      0.555029      -4.767746      1.660210
                                           H      0.835925      -3.443289      0.486956
                                           C      0.410190      -2.095489      3.639321
                                           H      0.815335      -1.098035      3.376761
                                           H      1.265170      -2.788016      3.777293

```

```

Conformation 29.
Multiplicity: 2
Charge: 0
E(B97-3c) = -2948.791163204811 Hartree
E(M06/def2-TZVP) = -2948.905511797009 Hartree
E(PBE - D3(BJ)/def2-TZVP) = -2947.683627294572 Hartree
E(PBE0 - D3(BJ)/def2-TZVP) = -2947.958092797182 Hartree
E(PBEh-3c) = -2944.943985125730 Hartree
E(PM6) = -238.12200 Kcal/mol
E(PM7) = -233.41507 Kcal/mol
E( $\omega$ B97X-V/def2-TZVP) = -2949.529129626508 Hartree
E(GFN1-xTB) = -182.425733895070 Hartree
E(GFN2-xTB) = -119.352012362808 Hartree

```

|   |           |           |          |   |           |           |           |
|---|-----------|-----------|----------|---|-----------|-----------|-----------|
| H | -0.104215 | -1.996916 | 4.615617 | H | -1.052980 | 2.829364  | -3.126817 |
| C | -3.333644 | 1.332946  | 1.529380 | H | -0.862291 | 1.850212  | -1.646994 |
| H | -2.457001 | 1.972752  | 1.315871 | H | -2.131909 | 3.102499  | -1.717230 |
| H | -3.996105 | 1.890660  | 2.224939 | C | -3.061753 | -1.733454 | 1.334006  |
| H | -3.888103 | 1.186253  | 0.583943 | C | -2.159425 | -2.846807 | 0.755696  |
| C | -2.288704 | 0.020252  | 4.082233 | H | -2.723866 | -3.487218 | 0.048351  |
| H | -2.191506 | -0.900855 | 4.690300 | H | -1.778875 | -3.490274 | 1.575084  |
| H | -3.022595 | 0.681073  | 4.588417 | H | -1.282689 | -2.442771 | 0.217106  |
| H | -1.307912 | 0.537259  | 4.090362 | C | -2.266090 | -0.853520 | 2.323537  |
| C | -4.513891 | -1.305357 | 2.372703 | H | -1.396617 | -0.359050 | 1.854284  |
| H | -4.878018 | -1.498049 | 1.342031 | H | -1.881647 | -1.467663 | 3.162977  |
| H | -5.292090 | -0.714041 | 2.899483 | H | -2.911582 | -0.058766 | 2.746561  |
| H | -4.414228 | -2.280789 | 2.886093 | C | -4.158925 | -2.443917 | 2.154559  |

Conformation 30.

Multiplicity: 2

Charge: 0

E(B97-3c) = -2948.802276506778 Hartree

E(M06/def2-TZVP) = -2948.914707507206 Hartree

E(PBE - D3(BJ)/def2-TZVP) = -2947.694500312586 Hartree

E(PBE0 - D3(BJ)/def2-TZVP) = -2947.969024251896 Hartree

E(PBEh-3c) = -2944.953222712317 Hartree

E(PM6) = -241.84948 Kcal/mol

E(PM7) = -239.71992 Kcal/mol

E( $\omega$ B97X-V/def2-TZVP) = -2949.540600975737 Hartree

E(GFN1-xTB) = -183.882366870867 Hartree

E(GFN2-xTB) = -119.363430066704 Hartree

E(GFN-FF) = -16.242713488232 Hartree

Coordinates:

|    |           |           |           |
|----|-----------|-----------|-----------|
| Ti | 0.250663  | -0.096100 | -0.354447 |
| Si | 3.181711  | 0.206908  | -2.172044 |
| Si | 1.429299  | -2.485404 | -2.337591 |
| O  | 0.886681  | 0.597109  | 1.206376  |
| O  | -1.522391 | -0.287852 | -0.719506 |
| C  | 1.492161  | -0.628305 | -1.934626 |
| H  | 0.824733  | -0.146007 | -2.699048 |
| C  | 1.107429  | 1.081858  | 2.452651  |
| C  | 1.841966  | 0.272177  | 3.378277  |
| C  | 2.048657  | 0.791451  | 4.669752  |
| H  | 2.604586  | 0.200737  | 5.407950  |
| C  | 1.565865  | 2.047740  | 5.044468  |
| H  | 1.744173  | 2.427622  | 6.061541  |
| C  | 0.859367  | 2.821865  | 4.120856  |
| H  | 0.493690  | 3.806688  | 4.435277  |
| C  | 0.606191  | 2.375938  | 2.809405  |
| C  | 2.393719  | -1.124792 | 3.009099  |
| C  | 3.199393  | -1.745581 | 4.168657  |
| H  | 4.072178  | -1.123473 | 4.451519  |
| H  | 3.584398  | -2.735991 | 3.853408  |
| H  | 2.577590  | -1.904499 | 5.072237  |
| C  | 1.233456  | -2.098824 | 2.703960  |
| H  | 0.551144  | -2.179997 | 3.573361  |
| H  | 1.629800  | -3.110757 | 2.481022  |
| H  | 0.629158  | -1.777402 | 1.833654  |
| C  | 3.350270  | -1.029144 | 1.800435  |
| H  | 2.837118  | -0.673862 | 0.889760  |
| H  | 3.782837  | -2.025747 | 1.577145  |
| H  | 4.185386  | -0.331210 | 2.012070  |
| C  | -0.184292 | 3.279501  | 1.832086  |
| C  | 0.650852  | 3.575227  | 0.567606  |
| H  | 1.609293  | 4.064825  | 0.832958  |
| H  | 0.092617  | 4.251469  | -0.112120 |
| H  | 0.893550  | 2.655724  | 0.005914  |
| C  | -0.528447 | 4.643738  | 2.465658  |
| H  | -1.183396 | 4.540356  | 3.353676  |
| H  | -1.075330 | 5.258170  | 1.722743  |
| H  | 0.377924  | 5.208209  | 2.762808  |
| C  | -1.527234 | 2.617897  | 1.451687  |
| H  | -1.398624 | 1.666231  | 0.906820  |
| H  | -2.115723 | 3.292317  | 0.796875  |
| H  | -2.131346 | 2.406728  | 2.355967  |
| C  | -2.872140 | -0.171741 | -0.762807 |
| C  | -3.457415 | 0.633614  | -1.793112 |
| C  | -4.858156 | 0.767489  | -1.789361 |
| H  | -5.344943 | 1.384986  | -2.554155 |
| C  | -5.656182 | 0.127750  | -0.837185 |
| H  | -6.749359 | 0.250039  | -0.860724 |
| C  | -5.062340 | -0.676368 | 0.138964  |
| H  | -5.709821 | -1.178517 | 0.867868  |
| C  | -3.667131 | -0.852795 | 0.213710  |
| C  | -2.616246 | 1.310101  | -2.901319 |
| C  | -3.498930 | 2.094578  | -3.893422 |
| H  | -2.855762 | 2.535825  | -4.680953 |
| H  | -4.043588 | 2.926358  | -3.403024 |
| H  | -4.238957 | 1.441613  | -4.397286 |
| C  | -1.876628 | 0.222806  | -3.714218 |
| H  | -2.602981 | -0.439247 | -4.227158 |
| H  | -1.246942 | -0.411721 | -3.068598 |
| H  | -1.230830 | 0.688920  | -4.487559 |
| C  | -1.611547 | 2.325276  | -2.311368 |

Conformation 32.

Multiplicity: 2

Charge: 0

E(B97-3c) = -2948.795389771905 Hartree

E(M06/def2-TZVP) = -2948.907235114917 Hartree

E(PBE - D3(BJ)/def2-TZVP) = -2947.687910692649 Hartree

E(PBE0 - D3(BJ)/def2-TZVP) = -2947.962032391801 Hartree

E(PBEh-3c) = -2944.946301764185 Hartree

E(PM6) = -239.70165 Kcal/mol

E(PM7) = -237.61489 Kcal/mol

E( $\omega$ B97X-V/def2-TZVP) = -2950.746549455186 Hartree

E(GFN1-xTB) = -183.227376004867 Hartree

E(GFN2-xTB) = -119.356187457274 Hartree

E(GFN-FF) = -16.234881433313 Hartree

Coordinates:

|    |           |           |           |
|----|-----------|-----------|-----------|
| Ti | 0.356914  | -0.081411 | 0.367559  |
| Si | 0.293980  | -1.068460 | 3.592250  |
| Si | 3.018437  | -1.484275 | 1.908412  |
| O  | -0.938803 | -1.236036 | -0.214424 |
| O  | 0.758781  | 1.543663  | -0.374777 |
| C  | 1.373867  | -0.557257 | 1.209995  |
| H  | 1.709618  | 0.485621  | 2.347673  |
| C  | -1.884530 | -1.743396 | -1.048130 |
| C  | -1.570194 | -2.906151 | -1.823458 |
| C  | -2.532542 | -3.344766 | -2.752194 |
| H  | -2.320498 | -4.221885 | -3.375767 |
| C  | -3.759656 | -2.694908 | -2.905783 |
| H  | -4.487838 | -3.055403 | -3.647590 |
| C  | -4.068037 | -1.600941 | -2.093756 |
| H  | -5.049386 | -1.124377 | -2.206254 |
| C  | -3.160319 | -1.099771 | -1.141075 |
| C  | -0.250653 | -3.692425 | -1.651573 |
| C  | -0.229568 | -4.973150 | -2.510667 |
| H  | -1.060418 | -5.659777 | -2.252522 |
| H  | 0.720308  | -5.515151 | -2.329609 |
| H  | -0.281938 | -4.753715 | -3.595891 |
| C  | 0.961841  | -2.843139 | -2.088783 |
| H  | 0.885547  | -2.563544 | -3.158175 |
| H  | 1.903100  | -3.414094 | -1.949498 |
| H  | 1.048733  | -1.906614 | -1.504764 |
| C  | -0.099043 | -4.135008 | -0.179516 |
| H  | -0.030752 | -3.273440 | 0.506250  |
| H  | 0.816043  | -4.750915 | -0.059849 |
| H  | -0.965663 | -4.751069 | 0.134143  |
| C  | -3.579229 | -0.075809 | -0.226477 |
| C  | -3.444309 | -0.341430 | 1.254941  |
| H  | -4.100277 | -1.206838 | 1.478140  |
| H  | -3.742591 | -0.494229 | 1.921263  |
| H  | -2.409549 | -0.630389 | 1.509299  |

|   |           |           |           |   |           |           |           |
|---|-----------|-----------|-----------|---|-----------|-----------|-----------|
| C | -5.054687 | 0.470850  | -0.446444 | C | -1.141709 | 2.635909  | 1.003867  |
| H | -5.239677 | 0.853759  | -1.470027 | C | -0.999992 | 3.188084  | 2.317429  |
| H | -5.321460 | 1.280614  | 0.261814  | C | -1.867937 | 4.237536  | 2.671533  |
| H | -5.743868 | -0.376739 | -0.260380 | H | -1.795701 | 4.686036  | 3.669668  |
| C | -2.742348 | 1.341441  | -0.513914 | C | -2.826093 | 4.733668  | 1.783606  |
| H | -1.674408 | 1.233196  | -0.242288 | H | -3.489217 | 5.556362  | 2.089891  |
| H | -3.132543 | 2.198161  | 0.073027  | C | -2.937943 | 4.182947  | 0.504453  |
| H | -2.780060 | 1.617251  | -1.585993 | H | -3.695291 | 4.590380  | -0.176046 |
| C | 0.709229  | 2.714553  | -1.059431 | C | -2.113321 | 3.126265  | 0.073117  |
| C | 0.834122  | 2.691160  | -2.492711 | C | 0.059335  | 2.680796  | 3.323807  |
| C | 0.705873  | 3.909062  | -3.181872 | C | -0.172497 | 1.191387  | 3.660040  |
| H | 0.791460  | 3.921929  | -4.274987 | H | -1.193620 | 1.027094  | 4.057631  |
| C | 0.457114  | 5.113418  | -2.516844 | H | 0.555133  | 0.853071  | 4.426508  |
| H | 0.339680  | 6.048326  | -3.084730 | H | -0.048517 | 0.537360  | 2.776068  |
| C | 0.372022  | 5.117444  | -1.126816 | C | 1.477339  | 2.881869  | 2.743970  |
| H | 0.184861  | 6.071661  | -0.614673 | H | 1.609188  | 2.345621  | 1.789169  |
| C | 0.520556  | 3.945983  | -0.353929 | H | 2.241047  | 2.513130  | 3.459858  |
| C | 1.071714  | 1.391367  | -3.296760 | H | 1.673411  | 3.956194  | 2.554350  |
| C | 2.329222  | 0.652745  | -2.789131 | C | 0.000858  | 3.452014  | 4.657910  |
| H | 2.494818  | -0.275862 | -3.372705 | H | 0.191014  | 4.535625  | 4.523927  |
| H | 2.253161  | 0.372877  | -1.724102 | H | 0.784091  | 3.060481  | 5.337671  |
| H | 3.227837  | 1.292488  | -2.903015 | H | -0.974476 | 3.329954  | 5.170396  |
| C | 1.308939  | 1.674801  | -4.795041 | C | -2.294816 | 2.537673  | -1.348025 |
| H | 2.181784  | 2.337744  | -4.959920 | C | -2.789223 | 1.075436  | -1.260385 |
| H | 0.425272  | 2.131109  | -5.284071 | H | -2.066181 | 0.403867  | -0.763489 |
| H | 1.512395  | 0.716970  | -5.314523 | H | -2.971143 | 0.668053  | -2.276764 |
| C | -0.181798 | 0.493943  | -3.210233 | H | -3.738419 | 1.015012  | -0.692071 |
| H | -0.050482 | -0.422039 | -3.820469 | C | -0.981685 | 2.618106  | -2.158731 |
| H | -1.072954 | 1.031431  | -3.590805 | H | -0.620811 | 3.663944  | -2.226697 |
| H | -0.409410 | 0.173156  | -2.179100 | H | -1.144957 | 2.243432  | -3.190334 |
| C | 0.420384  | 4.142787  | 1.182339  | H | -0.171837 | 2.013961  | -1.709460 |
| C | 1.349232  | 5.308439  | 1.608544  | C | -3.354847 | 3.316321  | -2.154365 |
| H | 2.402599  | 5.089591  | 1.340472  | H | -4.358566 | 3.264554  | -1.687765 |
| H | 1.296300  | 5.446668  | 2.707824  | H | -3.438737 | 2.871800  | -3.166193 |
| H | 1.076098  | 6.274317  | 1.143235  | H | -3.082375 | 4.383269  | -2.280007 |
| C | -1.042488 | 4.495304  | 1.541259  | C | -1.309348 | -2.548730 | -0.363288 |
| H | -1.389184 | 5.399945  | 1.003849  | C | -2.095455 | -3.071308 | -0.719875 |
| H | -1.141302 | 4.682867  | 2.630963  | C | -2.830280 | -4.244603 | 0.481022  |
| H | -1.722676 | 3.661766  | 1.274647  | H | -3.434807 | -4.677706 | 1.286889  |
| C | 0.838043  | 2.937867  | 2.038680  | C | -2.815131 | -4.855587 | -0.762895 |
| H | 0.121522  | 2.100065  | 1.955885  | H | -3.392684 | -5.808999 | -0.917437 |
| H | 0.855200  | 3.240820  | 3.105835  | C | -2.071810 | -4.337853 | -1.806548 |
| H | 1.847054  | 2.569547  | 1.771359  | H | -2.078126 | -4.845435 | -2.781818 |
| C | -0.711940 | -2.634263 | 3.232630  | C | -1.312816 | -3.157700 | -1.654836 |
| H | -1.397460 | -2.503439 | 2.372121  | C | -2.158759 | -2.387243 | 2.105867  |
| H | -1.325557 | -2.894686 | 4.120027  | C | -0.762204 | -2.362113 | 2.766257  |
| H | -0.053867 | -3.497845 | 3.011466  | H | -0.819883 | -1.900156 | 3.772883  |
| C | 1.314005  | -1.390597 | 5.166457  | H | -0.030660 | -1.782695 | 2.171812  |
| H | 2.017565  | -2.239686 | 5.053241  | H | -0.363590 | -3.390235 | 2.878041  |
| H | 0.632077  | -1.628708 | 6.009681  | C | -3.091280 | -3.144260 | 3.074506  |
| H | 1.903143  | -0.494834 | 5.451089  | H | -2.746179 | -4.180020 | 3.265239  |
| C | -0.900598 | 0.341747  | 4.037024  | H | -4.134622 | -3.186138 | 2.702880  |
| H | -0.343844 | 1.243967  | 4.362864  | H | -3.107063 | -2.615343 | 4.048377  |
| H | -1.559820 | 0.030562  | 4.874335  | C | -2.730344 | -0.956777 | 1.969412  |
| H | -1.551200 | 0.633397  | 3.188714  | H | -2.842287 | -0.490845 | 2.969318  |
| C | 2.845701  | -3.349320 | 2.195524  | H | -3.728652 | -0.981038 | 1.488696  |
| H | 2.507979  | -3.581467 | 3.225354  | H | -2.085309 | -0.292883 | 1.367743  |
| H | 3.827805  | -3.843318 | 2.044109  | C | -0.555071 | -2.671358 | -2.920079 |
| C | 2.123178  | -3.803216 | 1.490087  | C | 0.155655  | -1.308854 | -2.824629 |
| H | 4.288699  | -0.783565 | 3.135825  | H | -0.543073 | -0.489025 | -2.569980 |
| H | 4.430207  | 0.305368  | 2.973032  | H | 0.597950  | -1.067158 | -3.812323 |
| H | 5.274009  | -1.275898 | 2.996842  | H | 0.989997  | -1.310857 | -2.098555 |
| H | 3.975120  | -0.931753 | 4.187627  | C | 0.514600  | -3.729398 | -3.282249 |
| C | 3.770145  | -1.225571 | 0.181407  | H | 1.244999  | -3.850645 | -2.457254 |
| H | 3.154136  | -1.676248 | -0.621743 | H | 1.072099  | -3.422826 | -4.191881 |
| H | 4.775373  | -1.695749 | 0.135459  | H | 0.064419  | -4.721992 | -3.479094 |
| H | 3.896619  | -0.147248 | -0.048388 | C | -1.567512 | -2.538438 | -4.085123 |
|   |           |           |           | H | -2.078384 | -3.491786 | -4.318021 |
|   |           |           |           | H | -1.045435 | -2.205411 | -5.005650 |
|   |           |           |           | H | -2.347128 | -1.788207 | -3.841515 |
|   |           |           |           | C | 3.959452  | -2.059147 | -1.836411 |
|   |           |           |           | H | 3.091351  | -2.155250 | -2.517969 |
|   |           |           |           | H | 4.455948  | -3.050345 | -1.787155 |
|   |           |           |           | H | 4.674254  | -1.346488 | -2.293068 |
|   |           |           |           | C | 4.968422  | -1.408041 | 1.015545  |
|   |           |           |           | H | 5.665158  | -0.623162 | 0.661177  |
|   |           |           |           | H | 5.517389  | -2.372450 | 1.041367  |
|   |           |           |           | H | 4.676443  | -1.158857 | 2.057047  |
|   |           |           |           | C | 2.384847  | -2.963456 | 0.616050  |
|   |           |           |           | H | 2.061722  | -2.755816 | 1.656491  |
|   |           |           |           | H | 2.996272  | -3.890148 | 0.637381  |
|   |           |           |           | H | 1.475197  | -3.170573 | 0.017880  |
|   |           |           |           | C | 2.598041  | 3.187905  | -0.735255 |
|   |           |           |           | H | 1.497289  | 3.265971  | -0.645706 |
|   |           |           |           | H | 2.934201  | 3.927025  | -1.492281 |
|   |           |           |           | C | 3.038527  | 3.483354  | 0.238139  |
|   |           |           |           | H | 2.641027  | 1.644395  | -3.045736 |
|   |           |           |           | H | 2.936446  | 0.163095  | -3.414454 |
|   |           |           |           | H | 3.115199  | 1.923267  | -3.702529 |
|   |           |           |           | H | 1.542961  | 1.259456  | -3.159978 |
|   |           |           |           | C | 5.085666  | 1.538263  | -1.222823 |

Conformation 33.  
 Multiplicity: 2  
 Charge: 0  
 E(B97-3c) = -2948.797897032777 Hartree  
 E(M06/def2-TZVP) = -2948.911673040435 Hartree  
 E(PBE - D3(BJ)/def2-TZVP) = -2947.690176946010 Hartree  
 E(PBE0 - D3(BJ)/def2-TZVP) = -2947.965346112416 Hartree  
 E(PBEh-3c) = -2944.950169364931 Hartree  
 E(PM6) = -243.08368 Kcal/mol  
 E(PM7) = -239.63652 Kcal/mol  
 E( $\omega$ B97X-V/def2-TZVP) = -2950.749844454588 Hartree  
 E(GFN1-xTB) = -183.922041756334 Hartree  
 E(GFN2-xTB) = -119.359085331138 Hartree  
 E(GFN-FF) = -16.242295614269 Hartree

Coordinates:

|    |           |           |           |
|----|-----------|-----------|-----------|
| Ti | 0.441880  | 0.048089  | 0.141416  |
| Si | 3.428986  | -1.540195 | -0.088390 |
| Si | 3.183687  | 1.457676  | -1.251333 |
| O  | -0.321179 | 1.624142  | 0.632865  |
| O  | -0.544562 | -1.457561 | -0.140713 |
| C  | 2.508642  | 0.121297  | -0.081053 |
| H  | 2.649524  | 0.541980  | 0.954145  |

|   |          |          |           |
|---|----------|----------|-----------|
| H | 5.456895 | 1.751252 | -0.199329 |
| H | 5.431849 | 2.359329 | -1.885127 |
| H | 5.564993 | 0.601290 | -1.569341 |

Conformation 34.

Multiplicity: 2

Charge: 0

E(B97-3c) = -2948.793606837194 Hartree  
E(M06/def2-TZVP) = -2948.907717400867 Hartree  
E(PBE - D3(BJ)/def2-TZVP) = -2947.685639913320 Hartree  
E(PBE0 - D3(BJ)/def2-TZVP) = -2947.961066829451 Hartree  
E(PBEh-3c) = -2944.946018581296 Hartree  
E(PM6) = -241.79341 Kcal/mol  
E(PM7) = -238.47640 Kcal/mol  
E( $\omega$ B97X-V/def2-TZVP) = -2949.533379306207 Hartree  
E(GFN1-xTB) = -184.321434540650 Hartree  
E(GFN2-xTB) = -119.355282959582 Hartree  
E(GFN-FF) = -16.239270560723 Hartree

Coordinates:

|    |           |           |           |
|----|-----------|-----------|-----------|
| Ti | -0.020270 | 0.524757  | -0.014373 |
| Si | 2.279271  | 2.881064  | -0.542367 |
| Si | -0.516942 | 3.154804  | -2.145403 |
| O  | 0.727286  | -0.069710 | 1.534704  |
| O  | -1.057999 | -0.566998 | -1.025009 |
| C  | 0.436812  | 2.451505  | -0.665384 |
| H  | -0.038745 | 2.923543  | 0.239274  |
| C  | 1.102536  | -0.684409 | 2.678865  |
| C  | 1.928937  | -1.856255 | 2.592700  |
| C  | 2.310140  | -2.471585 | 3.797020  |
| H  | 2.942728  | -3.367069 | 3.770844  |
| C  | 1.902291  | -1.976195 | 5.040617  |
| H  | 2.215032  | -2.479909 | 5.967279  |
| C  | 1.098026  | -0.839403 | 5.095099  |
| H  | 0.786335  | -0.460744 | 6.079457  |
| C  | 0.674419  | -0.156906 | 3.934797  |
| C  | 2.387443  | -2.454175 | 1.241307  |
| C  | 3.326258  | -3.661941 | 1.441444  |
| H  | 4.245689  | -3.388646 | 1.997082  |
| H  | 3.638564  | -4.045641 | 0.449579  |
| H  | 2.830167  | -4.496217 | 1.976371  |
| C  | 1.165359  | -2.968548 | 0.445928  |
| H  | 0.614819  | -3.735869 | 1.025962  |
| H  | 1.494456  | -3.432963 | -0.506934 |
| H  | 0.445224  | -2.170087 | 0.192610  |
| C  | 3.181372  | -1.413950 | 0.419050  |
| H  | 2.568968  | -0.535212 | 0.147095  |
| H  | 3.550241  | -1.869780 | -0.522901 |
| H  | 4.058264  | -1.047063 | 0.989452  |
| C  | -0.205982 | 1.099506  | 4.175453  |
| C  | -0.693362 | 1.858341  | 2.926930  |
| H  | 0.149290  | 2.246661  | 2.326640  |
| H  | -1.298523 | 2.729354  | 3.253517  |
| H  | -1.345623 | 1.236507  | 2.280569  |
| C  | 0.616554  | 2.113576  | 5.009135  |
| H  | 0.945285  | 1.691972  | 5.978532  |
| H  | 0.010571  | 3.018638  | 5.222204  |
| H  | 1.523054  | 2.427370  | 4.452882  |
| C  | -1.470781 | 0.678437  | 4.962007  |
| H  | -2.073242 | -0.045548 | 4.376135  |
| H  | -2.105066 | 1.565020  | 5.169444  |
| C  | -1.227242 | 0.204982  | 5.932600  |
| H  | -1.808182 | -1.502190 | -1.645082 |
| C  | -1.397006 | -2.000756 | -2.918016 |
| C  | -2.261993 | -2.915697 | -3.554783 |
| H  | -1.993420 | -3.300233 | -4.549059 |
| C  | -3.450387 | -3.348800 | -2.968612 |
| H  | -4.100759 | -4.062332 | -3.496058 |
| C  | -3.807376 | -2.876643 | -1.700196 |
| H  | -4.738041 | -3.240395 | -1.248184 |
| C  | -3.010443 | -1.952831 | -1.002829 |
| C  | -0.108965 | -1.615480 | -3.696795 |
| C  | 0.947048  | -0.799249 | -2.924686 |
| H  | 1.842751  | -0.675609 | -3.567400 |
| H  | 1.274689  | -1.311298 | -2.000113 |
| H  | 0.595822  | 0.216252  | -2.667226 |
| C  | -0.522798 | -0.793034 | -4.940528 |
| H  | -1.025847 | 0.148427  | -4.641717 |
| H  | -1.220767 | -1.355113 | -5.592196 |
| H  | 0.370053  | -0.526789 | -5.544187 |
| C  | 0.611200  | -2.910038 | -4.150075 |
| H  | 1.532821  | -2.651624 | -4.710902 |
| H  | -0.010424 | -3.542755 | -4.811744 |
| H  | 0.903950  | -3.522938 | -3.273308 |
| C  | -3.436775 | -1.465420 | 0.404292  |
| C  | -2.377335 | -1.863940 | 1.458322  |
| H  | -2.204690 | -2.958494 | 1.449773  |
| H  | -2.723618 | -1.581494 | 2.474247  |
| H  | -1.400950 | -1.372948 | 1.298167  |
| C  | -3.665893 | 0.063730  | 0.419257  |
| H  | -2.739224 | 0.632125  | 0.207033  |

|   |           |           |           |
|---|-----------|-----------|-----------|
| H | -4.034875 | 0.383943  | 1.415647  |
| H | -4.419528 | 0.357518  | -0.338640 |
| C | -4.765196 | -2.113024 | 0.848174  |
| H | -5.603784 | -1.855377 | 0.170868  |
| H | -5.028203 | -1.743156 | 1.859270  |
| H | -4.691013 | -3.217218 | 0.908071  |
| C | 2.909542  | 2.568401  | 1.223824  |
| H | 2.383454  | 3.223406  | 1.949643  |
| H | 3.992094  | 2.804652  | 1.288200  |
| H | 2.766264  | 1.519776  | 1.549908  |
| C | 3.317663  | 1.859221  | -1.757976 |
| H | 3.243664  | 0.772884  | -1.553094 |
| H | 4.386384  | 2.147408  | -1.674810 |
| H | 3.001353  | 2.028141  | -2.806066 |
| C | 2.610865  | 4.719834  | -0.902847 |
| H | 2.345867  | 4.999703  | -1.942355 |
| H | 3.687721  | 4.947281  | -0.756627 |
| H | 2.030632  | 5.371269  | -0.217456 |
| C | -2.154366 | 2.240781  | -2.451978 |
| H | -2.005910 | 1.166044  | -2.674617 |
| H | -2.683997 | 2.702265  | -3.311722 |
| H | -2.826789 | 2.308164  | -1.572098 |
| C | 0.487665  | 3.076762  | -3.754793 |
| H | 1.412070  | 3.686040  | -3.700737 |
| H | -0.127172 | 3.472415  | -4.589660 |
| H | 0.777764  | 2.039677  | -4.015164 |
| C | -0.970221 | 4.968206  | -1.804275 |
| H | -1.588349 | 5.051866  | -0.886002 |
| H | -1.559116 | 5.389486  | -2.645788 |
| H | -0.069538 | 5.597982  | -1.664513 |

Conformation 9.

Multiplicity: 2

Charge: 0

E(B97-3c) = -2948.804852850955 Hartree  
E(M06/def2-TZVP) = -2948.916764770754 Hartree  
E(PBE - D3(BJ)/def2-TZVP) = -2947.696434917210 Hartree  
E(PBE0 - D3(BJ)/def2-TZVP) = -2947.970999992164 Hartree  
E(PBEh-3c) = -2944.954722030579 Hartree  
E(PM6) = -242.88212 Kcal/mol  
E(PM7) = -240.24007 Kcal/mol  
E( $\omega$ B97X-V/def2-TZVP) = -2950.753886133855 Hartree  
E(GFN1-xTB) = -184.676767207757 Hartree  
E(GFN2-xTB) = -119.364870949251 Hartree  
E(GFN-FF) = -16.241107833530 Hartree

Coordinates:

|    |           |           |           |
|----|-----------|-----------|-----------|
| Ti | 0.382302  | -0.113896 | -0.234362 |
| Si | 2.987610  | 1.634351  | -1.694703 |
| Si | 3.058992  | -1.578517 | -1.310113 |
| O  | 0.367039  | 0.892064  | 1.289678  |
| O  | -1.039142 | -1.040786 | -0.926181 |
| C  | 2.034670  | 0.013480  | -1.484187 |
| H  | 1.476937  | -0.132477 | -2.442613 |
| C  | -0.071879 | 1.407400  | 2.466064  |
| C  | 0.432396  | 0.860267  | 3.689451  |
| C  | -0.096499 | 1.369013  | 4.890545  |
| H  | 0.256381  | 0.968741  | 5.848887  |
| C  | -1.063552 | 2.377630  | 4.902033  |
| H  | -1.462178 | 2.750019  | 5.857497  |
| C  | -1.508108 | 2.924466  | 3.695563  |
| H  | -2.250609 | 3.731121  | 3.726755  |
| C  | -1.029603 | 2.471459  | 2.451423  |
| C  | 1.522435  | -0.235938 | 3.726734  |
| H  | 1.967257  | -0.553408 | 5.169171  |
| C  | 2.379299  | 0.338116  | 5.682885  |
| H  | 2.765355  | -1.322020 | 5.140567  |
| H  | 1.140483  | -0.959925 | 5.785385  |
| C  | 0.990895  | -1.555139 | 3.125040  |
| H  | 0.112349  | -1.922573 | 3.691225  |
| H  | 1.775964  | -2.439024 | 3.155438  |
| H  | 0.678962  | -1.440371 | 2.068359  |
| C  | 2.778819  | 0.236089  | 2.962570  |
| H  | 2.570327  | 0.414701  | 1.893945  |
| H  | 3.579805  | -0.527974 | 3.039286  |
| H  | 3.168657  | 1.181858  | 3.389813  |
| C  | -1.521291 | 3.138483  | 1.145289  |
| H  | -2.437118 | 4.346983  | 1.429773  |
| H  | -3.370344 | 4.055242  | 1.951847  |
| H  | -2.730857 | 4.812641  | 0.467774  |
| H  | -1.926431 | 5.122793  | 2.034518  |
| C  | -2.350979 | 2.150623  | 0.295480  |
| H  | -1.780896 | 1.254224  | -0.014595 |
| H  | -2.704330 | 2.643606  | -0.633206 |
| H  | -3.236758 | 1.794782  | 0.856966  |
| C  | -0.317200 | 3.673658  | 0.339425  |
| H  | 0.253561  | 4.416901  | 0.931973  |
| H  | -0.668157 | 4.171346  | -0.588012 |
| H  | 0.380652  | 2.868308  | 0.050678  |
| C  | -2.272237 | -1.425311 | -1.344171 |
| C  | -2.652004 | -1.153829 | -2.699890 |

|   |           |           |           |
|---|-----------|-----------|-----------|
| C | -3.956503 | -1.504432 | -3.093263 |
| H | -4.285266 | -1.300278 | -4.119743 |
| C | -4.851990 | -2.113449 | -2.210610 |
| H | -5.867614 | -2.373201 | -2.544818 |
| C | -4.445958 | -2.406818 | -0.906318 |
| H | -5.156927 | -2.905107 | -0.236142 |
| C | -3.159994 | -2.082858 | -0.433216 |
| C | -1.679008 | -0.523913 | -3.720346 |
| C | -0.439587 | -1.437769 | -3.876870 |
| H | 0.310714  | -0.966423 | -4.545625 |
| H | -0.734652 | -2.407269 | -4.326320 |
| H | 0.044991  | -1.653820 | -2.909132 |
| C | -1.287729 | 0.907978  | -3.289493 |
| H | -0.774481 | 0.943340  | -2.308338 |
| H | -2.189644 | 1.547656  | -3.209686 |
| H | -0.605768 | 1.365882  | -4.034767 |
| C | -2.311363 | -0.395523 | -5.121387 |
| H | -1.562882 | 0.032180  | -5.818368 |
| H | -3.191002 | 0.279101  | -5.125396 |
| H | -2.623087 | -1.377470 | -5.529976 |
| C | -2.757217 | -2.458292 | 1.011649  |
| C | -1.511649 | -3.372685 | 0.989974  |
| H | -1.727883 | -4.310173 | 0.438816  |
| H | -1.213518 | -3.643332 | 2.023631  |
| H | -0.648340 | -2.887993 | 0.502008  |
| C | -2.494666 | -1.186927 | 1.847176  |
| H | -1.652590 | -0.589963 | 1.459406  |
| H | -2.253108 | -1.452802 | 2.896080  |
| H | -3.387825 | -0.531590 | 1.858366  |
| C | -3.872868 | -3.239462 | 1.735487  |
| H | -4.798249 | -2.639953 | 1.848713  |
| H | -3.525103 | -3.504377 | 2.754046  |
| H | -4.129172 | -4.183169 | 1.213748  |
| C | 4.549927  | 1.435501  | -2.765151 |
| H | 5.292927  | 0.743681  | -2.320528 |
| H | 5.043747  | 2.422007  | -2.890772 |
| H | 4.294569  | 1.056489  | -3.775970 |
| C | 1.893515  | 2.873658  | -2.629084 |
| H | 1.671173  | 2.496583  | -3.648856 |
| H | 2.418103  | 3.845838  | -2.737079 |
| H | 0.928743  | 3.062564  | -2.120321 |
| C | 3.524037  | 2.368415  | -0.032363 |
| H | 2.658529  | 2.574558  | 0.627820  |
| H | 4.066692  | 3.322274  | -0.197254 |
| H | 4.205428  | 1.680672  | 0.507692  |
| C | 3.662818  | -2.134784 | -3.021398 |
| H | 2.802393  | -2.308053 | -3.700549 |
| H | 4.231306  | -3.085096 | -2.943571 |
| H | 4.320608  | -1.376409 | -3.489442 |
| C | 2.032415  | -3.025966 | -0.612431 |
| H | 1.746603  | -2.870203 | 0.448290  |
| H | 2.639986  | -3.955403 | -0.653370 |
| H | 1.105801  | -3.211034 | -1.193724 |
| C | 4.536826  | -1.345389 | -0.147734 |
| H | 5.238827  | -0.568848 | -0.510935 |
| H | 5.101194  | -2.296807 | -0.059810 |
| H | 4.202797  | -1.053336 | 0.867246  |
